# Supplementary material for: Gene expression in mouse muscle over time after nickel pellet implantation
Source: Royal Society of Chemistry journal article supplement (doi:10.1039/c9mt00289h), 2020-02-12
Supplement: c9mt00289h1.xlsx [file c9mt00289h1.xlsx]

## Sheet: Subset of Figure1_NickelConcent
Sample	Array	Week	Treatment	leg	Animal #	Tumor	Serum_Comment	tissue__Comment	Pathologist Analysis
38	124	2	N	L	37	No Tumor	normal
37	125	2	N	R	37	No Tumor	normal	inflammation
40	126	2	N	L	38	No Tumor	normal
39	127	2	N	R	38	No Tumor	normal	inflammation
42	128	2	N	L	39	No Tumor	normal
41	129	2	N	R	39	No Tumor	normal	inflammation; no pellet
44	130	2	N	L	40	No Tumor	normal
43	131	2	N	R	40	No Tumor	normal	inflammation
46	132	2	N	L	41	No Tumor	normal
45	133	2	N	R	41	No Tumor	normal	inflammation
58	134	6	N	L	42	No Tumor	normal
57	135	6	N	R	42	No Tumor	normal	inflammation; near bone
60	136	6	N	L	43	No Tumor	slightly hemolyzed
59	137	6	N	R	43	No Tumor	slightly hemolyzed	white infection
65	138	6	N	L	45	No Tumor	slightly hemolyzed
64	139	6	N	R	45	No Tumor	slightly hemolyzed
76	140	6	N	L	46	No Tumor	normal
75	141	6	N	R	46	No Tumor	normal
78	142	9	N	L	82	No Tumor	normal
77	143	9	N	R	82	No Tumor	normal	red tissue; near bone
80	144	9	N	L	83	No Tumor	normal
79	145	9	N	R	83	No Tumor	normal
84	146	9	N	L	85	No Tumor	slightly hemolyzed
83	147	9	N	R	85	No Tumor	normal	brown inflammation
86	148	9	N	L	86	No Tumor	normal
85	149	9	N	R	86	No Tumor	slightly hemolyzed	pellet in white capsule
118	1	12	N	L	102	No Tumor	normal
117	2	12	N	R	102	No Tumor	normal
120	3	12	N	L	103	No Tumor	normal
119	4	12	N	R	103	No Tumor	normal
122	5	12	N	L	104	No Tumor	normal
121	6	12	N	R	104	No Tumor	normal
124	7	12	N	L	105	No Tumor	normal
123	8	12	N	R	105	No Tumor	normal
126	9	12	N	L	106	No Tumor	normal
125	10	12	N	R	106	No Tumor	normal	abscess
158	11	15	N	L	112	No Tumor	normal
157	12	15	N	R	112	No Tumor	normal	capsule
160	13	15	N	L	113	No Tumor	normal
159	14	15	N	R	113	No Tumor	normal	capsule
162	15	15	N	L	114	No Tumor	normal
161	16	15	N	R	114	Possible	normal	capsule; cancer-like
164	17	15	N	L	115	No Tumor	normal
163	18	15	N	R	115	No Tumor	normal	abscess; blood filled
166	19	15	N	L	116	No Tumor	normal
165	20	15	N	R	116	Possible	normal	capsule; cancer like
138	21	18	N	L	127	No Tumor	slightly hemolyzed
137	22	18	N	R	127	No Tumor	slightly hemolyzed
140	23	18	N	L	128	No Tumor	normal
139	24	18	N	R	128	No Tumor	normal	bloody mass around pellet
142	25	18	N	L	129	No Tumor	normal
141	26	18	N	R	129	No Tumor	normal	seroma around pellet
144	27	18	N	L	130	No Tumor	normal
143	28	18	N	R	130	No Tumor	normal	blood surrounding pellet
146	29	18	N	L	131	No Tumor	slightly hemolyzed
145	30	18	N	R	131	No Tumor	slightly hemolyzed	bloody mass around pellet
198	54	21	N	L	187	No Tumor	normal
197	55	21	N	R	187	No Tumor	normal	abscess
200	56	21	N	L	188	No Tumor	slightly hemolyzed
199	57	21	N	R	188	No Tumor	slightly hemolyzed
202	58	21	N	L	189	No Tumor	hemolyzed
201	59	21	N	R	189	No Tumor	hemolyzed
204	60	21	N	L	190	No Tumor	normal
203	61	21	N	R	190	No Tumor	normal	capsule; fibrous
206	62	21	N	L	191	No Tumor	normal
205	63	21	N	R	191	No Tumor	normal	kidney stones
180	31	24	N	L	138	No Tumor	normal
179	32	24	N	R	138	No Tumor	normal
182	33	24	N	L	139	No Tumor	normal
181	34	24	N	R	139	Possible	normal	tumor-like mass
184	35	24	N	L	140	No Tumor	normal
183	36	24	N	R	140	Possible	normal	tumor-like mass; with blood
186	37	24	N	L	141	No Tumor	normal
185	38	24	N	R	141	No Tumor	normal	pellet in left leg
243	39	27	N	L	142	No Tumor	normal
242	40	27	N	R	142	No Tumor	normal	red
244	41	27	N	R	143	Possible	normal	tumor-like red mass
246	42	27	N	L	144	No Tumor	hemolyzed
245	43	27	N	R	144	Possible	hemolyzed	tumor-like red mass
248	44	27	N	L	145	No Tumor	normal
247	45	27	N	R	145	No Tumor	normal	fatty tissue around pellet
250	46	27	N	L	146	No Tumor	normal
249	47	27	N	R	146	Possible	normal	tumor-like red mass
266	74	30	N	L	207	No Tumor	normal
265	75	30	N	R	207	Tumor	normal
268	86	30	N	L	227	No Tumor	normal
267	87	30	N	R	227	Tumor	normal
270	98	30	N	L	243	No Tumor	normal
269	99	30	N	R	243	No Tumor	normal
272	100	30	N	L	244	No Tumor	normal
271	101	30	N	R	244	Tumor	normal
284	50	33	N	L	169	No Tumor	normal
283	51	33	N	R	169	Tumor	normal	small tumor
286	52	33	N	L	171	No Tumor	normal
285	53	33	N	R	171	Tumor	normal	inflammation
288	72	33	N	L	201	No Tumor	normal
287	73	33	N	R	201	Possible	normal	possible small tumor
290	104	33	N	L	246	No Tumor	hemolyzed
289	105	33	N	R	246	Possible	hemolyzed	possible small tumor
292	109	33	N	L	254	No Tumor	hemolyzed
291	110	33	N	R	254	Tumor	hemolyzed	small tumor
304	48	37	N	L	168	No Tumor	normal
303	49	37	N	R	168	No Tumor	normal
306	78	37	N	L	211	No Tumor	normal
305	79	37	N	R	211	No Tumor	normal
307	88	37	N	R	228	No Tumor	normal	fibrotic tissue around pellet
309	107	37	N	L	253	No Tumor	normal
308	108	37	N	R	253	Tumor	normal
310	113	37	N	R	256	No Tumor	slightly hemolyzed	may have been mixed up with right leg
311	114	37	N	R	256	No Tumor	slightly hemolyzed	abdominal tumor
323	64	41	N	L	197	No Tumor	normal
322	65	41	N	R	197	No Tumor	normal
327	68	41	N	L	199	No Tumor	normal
326	69	41	N	R	199	No Tumor	normal
325	70	41	N	L	200	No Tumor	normal
324	71	41	N	R	200	No Tumor	normal	pellet breaking up
329	84	41	N	L	216	No Tumor	normal
328	85	41	N	R	216	No Tumor	normal
331	111	41	N	L	255	No Tumor	normal
330	112	41	N	R	255	No Tumor	normal
343	82	46	N	L	214	No Tumor	normal
342	83	46	N	R	214	Tumor	normal	1 cm tumor; preserved; maybe salivary gland methasthesis	fibrosarcoma								Figure 2. 08‐0214. Nickel.
345	89	46	N	L	230	No Tumor	normal										Fibrosarcoma. The tumor is
344	90	46	N	R	230	Tumor	normal	0.5 cm; foci on kidney									composed of streaming and
347	91	46	N	L	237	No Tumor	normal										interlacing bundles of
346	92	46	N	R	237	No Tumor	normal	kidney, liver, and bladder problems									malignant, densely packed
348	93	46	N	L	239	No Tumor	normal										spindloid cells. HE 200x. Left
350	102	46	N	L	245	No Tumor	normal										Normal Adjacent Skeletal
349	103	46	N	R	245	No Tumor	normal										Muscle 100x HE.
369	80	51	N	L	212	No Tumor	normal
368	81	51	N	R	212	No Tumor	normal	kidney atrophied
362	94	51	N	L	241	No Tumor	normal
361	95	51	N	R	241	No Tumor	normal
364	96	51	N	L	242	No Tumor	normal
363	97	51	N	R	242	No Tumor	normal
365	106	51	N	R	252	No Tumor	normal
367	115	51	N	L	257	No Tumor	normal
366	116	51	N	R	257	No Tumor	normal
395	66	53	N	L	198	No Tumor	normal
394	67	53	N	R	198	No Tumor	normal	hair loss
397	76	53	N	L	209	No Tumor	normal
396	77	53	N	R	209	No Tumor	normal
