# Supplementary material for: Gene expression in mouse muscle over time after nickel pellet implantation
Source: Royal Society of Chemistry journal article supplement (doi:10.1039/c9mt00289h), 2020-02-12
Supplement: c9mt00289h2.xlsx [file c9mt00289h2.xlsx]

## Sheet: Explanation of Data
Explanation of Data Sheet
Exp2 Diff of leg*Week = (R 02)-(L 02)	Values transformed back from log2 values shown in column Diff of leg*Week = (R 02)-(L 02)
Sig Index for Diff of leg*Week = (R 02)-(L 02)	Gene in row significant based on FDR of 0.05 are given a 1; otherwise 0
Sum Sig Index (Column AF) shows the sum of all the "1" values across a row which is the number of times a gene was found significant
To find a specific gene, search the Symbol Column (column B)
Genes expression has been sorted for 2 week time period
To sort genes for any time points (columns D to Q) select a column heading and used Data\Sort

## Sheet: Supplementary Data Table 1
PROBE_ID	Symbol	Definition	Exp2 Diff of leg*Week = (R 02)-(L 02)	Exp2 Diff of leg*Week = (R 06)-(L 06)	Exp2 Diff of leg*Week = (R 09)-(L 09)	Exp2 Diff of leg*Week = (R 12)-(L 12)	Exp2 Diff of leg*Week = (R 15)-(L 15)	Exp2 Diff of leg*Week = (R 18)-(L 18)	Exp2 Diff of leg*Week = (R 21)-(L 21)	Exp2 Diff of leg*Week = (R 24)-(L 24)	Exp2 Diff of leg*Week = (R 27)-(L 27)	Exp2 Diff of leg*Week = (R 30)-(L 30)	Exp2 Diff of leg*Week = (R 33)-(L 33)	Exp2 Diff of leg*Week = (R 37)-(L 37)	Exp2 Diff of leg*Week = (R 41)-(L 41)	Exp2 Diff of leg*Week = (R 46)-(L 46)	Sig Index for Diff of leg*Week = (R 02)-(L 02)	Sig Index for Diff of leg*Week = (R 06)-(L 06)	Sig Index for Diff of leg*Week = (R 09)-(L 09)	Sig Index for Diff of leg*Week = (R 12)-(L 12)	Sig Index for Diff of leg*Week = (R 15)-(L 15)	Sig Index for Diff of leg*Week = (R 18)-(L 18)	Sig Index for Diff of leg*Week = (R 21)-(L 21)	Sig Index for Diff of leg*Week = (R 24)-(L 24)	Sig Index for Diff of leg*Week = (R 27)-(L 27)	Sig Index for Diff of leg*Week = (R 30)-(L 30)	Sig Index for Diff of leg*Week = (R 33)-(L 33)	Sig Index for Diff of leg*Week = (R 37)-(L 37)	Sig Index for Diff of leg*Week = (R 41)-(L 41)	Sig Index for Diff of leg*Week = (R 46)-(L 46)	Sum Sig Index for Diffs	Avg Sig Index for Diffs	Variance_Complete_Date2	Variance_Plate	Variance_Animal	Variance_Residual	SumVariance	SampleVariance	PropVar_Complete_Date2	PropVar_Plate	PropVar_Animal	PropVar_Residual	RSquare	N2RLL	AIC	AICC	BIC	F_T3_leg_Week	NDF_T3_leg_Week
ILMN_2772632	Saa3	Mus musculus serum amyloid A 3 (Saa3), mRNA.	2027.66	468.791	3262.98	1661.51	19.9788	276.196	232.225	212.954	9.7969	963.206	161.417	10.1825	505.909	291.143	1	1	1	1	0	1	1	1	0	1	1	0	1	1	11	0.785714	5.1261	0	0	7.92812	13.0542	24.9836	0.392678	0	0	0.607322	0.763767	435.9	439.9	440	439.5	9.52	27
ILMN_2777498	Il1b		781.093	169.131	359.388	199.281	12.9507	18.4439	131.291	47.365	3.13491	262.614	38.4297	17.9945	121.381	42.8154	1	1	1	1	0	0	1	1	0	1	1	0	1	0	9	0.642857	5.32808	0	0	5.19773	10.5258	15.4024	0.506192	0	0	0.493808	0.749107	402	406	406.1	405.6	8.75	27
ILMN_2737685	Mmp13	Mus musculus matrix metallopeptidase 13 (Mmp13), mRNA.	720.86	139.33	596.55	1076.12	729.619	984.502	2529.33	397.187	310.57	6929.01	59.2123	4.35877	2188.46	606.454	1	1	1	1	1	1	1	1	1	1	1	0	1	1	13	0.928571	7.8574	0	0.986329	5.38258	14.2263	27.6939	0.552314	0	0.069331	0.378354	0.8753	412.6	418.6	419	418	16.41	27
ILMN_2690603	Spp1	Mus musculus secreted phosphoprotein 1 (Spp1), mRNA.	493.968	51.4893	99.6864	382.252	20.491	150.313	446.613	46.0483	27.4447	177.942	8.48918	14.1831	237.97	68.9124	1	1	1	1	1	1	1	1	1	1	0	0	1	1	12	0.857143	3.76184	0.231657	0	4.16318	8.15668	15.3334	0.461198	0.028401	0	0.510401	0.803329	386.9	392.9	393.2	392.3	11.34	27
ILMN_2619952	Mmp10	Mus musculus matrix metallopeptidase 10 (Mmp10), mRNA.	422.461	196.157	273.505	294.475	24.5621	181.336	404.916	79.5216	122.108	503.867	31.2325	4.11786	394.642	68.0965	1	1	1	1	0	1	1	1	1	1	0	0	1	1	11	0.785714	3.05944	0	0	5.84183	8.90127	18.1198	0.343708	0	0	0.656292	0.759842	411	415	415.2	414.6	9.32	27
ILMN_1223257	Ccl4	Mus musculus chemokine (C-C motif) ligand 4 (Ccl4), mRNA.	311.778	246.179	971.234	266.59	47.0734	71.8293	254.419	186.47	9.08225	786.789	104.813	3.22948	281.788	58.4386	1	1	1	1	1	1	1	1	0	1	1	0	1	0	11	0.785714	5.96053	0	0	6.61202	12.5726	19.0933	0.474091	0	0	0.525909	0.74245	421.4	425.4	425.5	425	8.38	27
ILMN_2763245	Cxcl1	Mus musculus chemokine (C-X-C motif) ligand 1 (Cxcl1), mRNA.	271.437	201.658	381.86	99.834	9.07564	19.1016	129.533	76.0486	17.4456	1179.04	42.7018	2.82895	394.806	80.0669	1	1	1	1	0	0	1	1	0	1	1	0	1	1	10	0.714286	0	0	0	5.65513	5.65513	15.622	0	0	0	1	0.728502	407.6	409.6	409.6	409.4	8.05	27
ILMN_2705628	Clec4d	Mus musculus C-type lectin domain family 4, member d (Clec4d), mRNA.	240.735	173.782	834.62	202.22	51.1414	80.1455	169.817	87.307	2.77464	134.541	48.7752	14.8077	153.302	135.237	1	1	1	1	1	1	1	1	0	1	1	0	1	1	12	0.857143	3.47828	0	0	5.67633	9.15461	16.6156	0.379949	0	0	0.620051	0.745641	408.8	412.8	412.9	412.4	8.67	27
ILMN_2725927	Serpina3g	Mus musculus serine (or cysteine) peptidase inhibitor, clade A, member 3G (Serpina3g), mRNA.	196.836	163.446	424.435	20.4842	10.5343	15.4609	41.7296	36.2278	12.8902	254.079	57.1547	3.76687	48.6736	65.0435	1	1	1	0	0	0	1	0	0	1	0	0	0	0	5	0.357143	0	0	0	7.02914	7.02914	14.4599	0	0	0	1	0.635417	425.2	427.2	427.3	427	5.23	27
ILMN_2635272	Igh-VJ558	PREDICTED: Mus musculus immunoglobulin heavy chain (J558 family) (Igh-VJ558), mRNA.	169.049	155.015	49.883	32.624	5.24441	31.3148	6.74688	25.4488	99.3938	40.3669	37.7048	3.6334	13.9108	17.8841	1	1	1	1	0	1	0	0	1	0	1	0	0	0	7	0.5	0	0	0.935105	4.67308	5.60818	11.9138	0	0	0.166739	0.833261	0.748122	405.8	409.8	410	409.4	6.21	27
ILMN_3160750	AA467197	Mus musculus expressed sequence AA467197 (AA467197), mRNA.	143.417	80.9635	245.725	140.418	32.8363	79.355	81.7179	34.1562	3.23943	136.063	26.3207	7.1952	85.1598	35.8411	1	1	1	1	1	1	1	1	0	1	1	0	1	1	12	0.857143	1.30235	0	0	4.08455	5.38689	12.3998	0.241762	0	0	0.758238	0.754249	381.8	385.8	385.9	385.4	9.11	27
ILMN_1230152	Adamts4		116.703	67.1819	191.762	39.1799	13.5665	8.78977	76.5091	47.9647	12.7514	120.015	39.8236	10.7374	160.271	59.5453	1	1	1	1	0	0	1	1	0	1	1	0	1	1	10	0.714286	0	0	0	4.7521	4.7521	11.9252	0	0	0	1	0.701132	393.5	395.5	395.5	395.3	7.04	27
ILMN_2771176	Ccl7		113.797	114.325	268.648	170.02	16.802	27.6657	175.755	78.2327	12.3421	242.073	45.142	6.62873	107.255	75.1821	1	1	1	1	0	0	1	1	0	1	1	0	1	1	10	0.714286	0	0	0	5.75539	5.75539	15.0248	0	0	0	1	0.712706	409	411	411.1	410.8	7.44	27
ILMN_2835117	Ccl7	Mus musculus chemokine (C-C motif) ligand 7 (Ccl7), mRNA.	111.504	102.452	334.926	220.797	28.8652	27.4898	198.27	99.9026	10.1934	221.501	105.995	7.92616	289.028	91.6058	1	1	1	1	1	0	1	1	0	1	1	0	1	1	11	0.785714	2.96942	0	0	5.76626	8.73568	15.8797	0.339918	0	0	0.660082	0.729493	410	414	414.1	413.5	7.97	27
ILMN_2711075	Mmp9	Mus musculus matrix metallopeptidase 9 (Mmp9), mRNA.	108.419	24.9028	25.4122	4.92007	2.41342	4.74571	7.11192	6.26505	5.25221	18.6241	3.00945	4.1436	4.68993	2.93093	1	1	1	0	0	0	0	0	0	1	0	0	0	0	4	0.285714	0	0	0	2.04828	2.04828	4.48092	0	0	0	1	0.657166	325.3	327.3	327.4	327.1	5.75	27
ILMN_2919411	Osm	Mus musculus oncostatin M (Osm), mRNA.	108.136	42.9256	70.9153	24.3191	7.3211	4.24731	31.9442	5.95985	5.56249	20.5695	12.2465	3.09511	70.752	12.1063	1	1	1	1	0	0	1	0	0	0	0	0	1	0	6	0.428571	4.27787	0	0	3.29916	7.57704	7.66745	0.564584	0	0	0.435416	0.680286	365.3	369.3	369.5	368.9	6.24	27
ILMN_2688912	F10		107.156	83.8749	221.89	68.5707	25.0816	22.2241	155.137	57.6371	7.38573	51.6251	17.7851	8.14076	129.147	27.7744	1	1	1	1	1	1	1	1	0	1	0	0	1	1	11	0.785714	1.64658	0	0	3.90645	5.55303	11.5396	0.296519	0	0	0.703481	0.747662	378.3	382.3	382.5	381.9	8.72	27
ILMN_2772264	Igh-VJ558		104.347	176.244	36.557	76.5028	9.49574	42.5349	8.39029	17.6666	148.734	57.7667	94.296	2.86639	24.7073	38.5638	1	1	0	1	0	0	0	0	1	0	1	0	0	0	5	0.357143	0	0	0	7.23168	7.23168	14.31	0	0	0	1	0.620981	427.5	429.5	429.6	429.3	4.92	27
ILMN_2995688	EG433016	Mus musculus predicted gene, EG433016 (EG433016), mRNA.	95.2584	110.753	140.104	13.8474	3.9527	10.3609	104.444	8.1541	3.70523	42.9316	5.43385	4.61565	115.017	35.9366	1	1	1	1	0	0	1	0	0	1	0	0	1	1	8	0.571429	0.459485	0.044509	0	3.50152	4.00552	9.34767	0.114713	0.011112	0	0.874175	0.722686	369.9	375.9	376.3	375.3	7.55	27
ILMN_3072427	Il1rn	Mus musculus interleukin 1 receptor antagonist (Il1rn), transcript variant 1, mRNA.	94.7579	68.7347	147.887	49.2264	14.5956	8.63682	54.6103	16.3623	5.60724	15.0846	13.3605	2.93079	34.9616	13.0266	1	1	1	1	0	0	1	0	0	0	0	0	1	0	6	0.428571	1.24814	0	0	3.96375	5.21189	9.28441	0.23948	0	0	0.76052	0.681483	379.4	383.4	383.5	382.9	6.24	27
ILMN_2803674	S100a9	Mus musculus S100 calcium binding protein A9 (calgranulin B) (S100a9), mRNA.	92.4435	28.1468	42.4215	4.41551	3.17567	5.80109	11.1652	6.92541	1.03229	15.7918	6.64618	8.82268	11.6178	5.81004	1	0	1	0	0	0	0	0	0	0	0	0	0	0	2	0.142857	8.37297	0.21726	0.05917	3.79854	12.4479	7.57775	0.672639	0.017454	0.004753	0.305154	0.64289	381.4	389.4	389.9	388.5	4.46	27
ILMN_2899041	Mmp3	Mus musculus matrix metallopeptidase 3 (Mmp3), mRNA.	89.3595	157.692	497.715	72.0497	27.0235	18.0832	211.387	60.8569	35.228	1662.88	56.3561	2.66081	232.959	67.3497	1	1	1	1	0	0	1	1	0	1	1	0	1	1	10	0.714286	2.86356	0	0	6.33099	9.19455	16.391	0.311441	0	0	0.688559	0.712151	417.5	421.5	421.6	421	7.29	27
ILMN_1245710	Ccl2	Mus musculus chemokine (C-C motif) ligand 2 (Ccl2), mRNA.	88.9332	45.538	101.64	95.7208	11.862	15.2256	85.8615	9.1724	9.032	51.2365	9.21111	6.2619	22.4618	12.5934	1	1	1	1	1	1	1	0	0	1	0	0	1	0	9	0.642857	1.50076	0	0	2.71775	4.21851	8.59167	0.355755	0	0	0.644245	0.764406	349.1	353.1	353.2	352.6	9.45	27
ILMN_2811154	Cxcl2	Mus musculus chemokine (C-X-C motif) ligand 2 (Cxcl2), mRNA.	88.0728	40.2374	66.273	15.2725	5.06457	6.42802	26.2212	5.38175	3.15087	16.0633	6.5957	2.84988	28.0767	9.10642	1	1	1	1	0	0	1	0	0	0	0	0	0	0	5	0.357143	0	0	0	3.6194	3.6194	7.43494	0	0	0	1	0.634893	371.4	373.4	373.5	373.2	5.22	27
ILMN_2753809	Mmp3	Mus musculus matrix metallopeptidase 3 (Mmp3), mRNA.	86.1946	130.804	600.127	96.436	23.7162	28.5729	469.298	198.676	30.5968	1133.94	129.362	6.23743	425.692	69.1492	1	1	1	1	0	0	1	1	0	1	1	0	1	0	9	0.642857	2.75699	0	0	7.27548	10.0325	18.9221	0.274807	0	0	0.725193	0.713298	428.6	432.6	432.8	432.2	7.35	27
ILMN_2952275	Arg1	Mus musculus arginase 1, liver (Arg1), mRNA.	85.663	102.615	139.783	36.0728	9.97806	18.7183	85.8187	6.99998	3.05498	54.3962	9.54735	3.96014	88.5037	25.9372	1	1	1	1	0	0	1	0	0	1	0	0	1	0	7	0.5	0	0	0	4.80819	4.80819	10.5001	0	0	0	1	0.656562	394.4	396.4	396.5	396.2	5.74	27
ILMN_1250421	Mmp12	Mus musculus matrix metallopeptidase 12 (Mmp12), mRNA.	81.1939	30.211	142.143	161.134	26.8871	48.864	78.9605	64.5155	14.8389	91.5423	29.0487	5.72812	62.4155	63.1386	1	0	1	1	1	1	1	1	0	1	1	0	1	1	11	0.785714	0.281721	0	0	4.10651	4.38823	11.9561	0.064199	0	0	0.935801	0.742839	381.8	385.8	386	385.4	8.61	27
ILMN_2965903	Hdc	Mus musculus histidine decarboxylase (Hdc), mRNA.	77.5282	44.9163	71.9676	2.80979	4.79762	1.36268	21.3766	21.9877	2.12566	55.4097	10.9891	2.77431	29.248	10.276	1	1	1	0	0	0	1	1	0	1	1	0	1	0	8	0.571429	0.061675	0	0.367333	2.40879	2.8378	6.95074	0.021733	0	0.129443	0.848824	0.77072	349.3	355.3	355.6	354.7	7.66	27
ILMN_2625377	Rgs1	Mus musculus regulator of G-protein signaling 1 (Rgs1), mRNA.	77.3002	80.215	252.012	92.3641	12.2856	18.823	87.9127	34.3711	10.8594	112.994	26.281	5.61343	60.883	34.6598	1	1	1	1	0	0	1	1	0	1	1	0	1	1	10	0.714286	0.175203	0	0	3.97907	4.15427	11.3976	0.042174	0	0	0.957826	0.738465	379.2	383.2	383.4	382.8	8.37	27
ILMN_1248139	Gp49a		74.4436	127.991	195.06	90.0603	22.4496	26.7154	61.2951	67.6949	3.52926	57.9311	42.0738	12.1654	127.407	37.365	1	1	1	1	1	1	1	1	0	1	1	0	1	1	12	0.857143	3.20339	0	0	4.03573	7.23912	12.0651	0.442511	0	0	0.557489	0.75114	381.3	385.3	385.5	384.9	8.72	27
ILMN_2680827	Il7r	Mus musculus interleukin 7 receptor (Il7r), mRNA.	73.818	111.109	133.17	19.5986	11.7393	6.20605	35.3687	62.0711	8.4318	81.6737	18.8504	7.74594	30.5931	26.0262	1	1	1	1	0	0	1	1	0	1	0	0	0	0	7	0.5	2.40778	0	0	4.5278	6.93558	10.1692	0.347164	0	0	0.652836	0.668349	390.4	394.4	394.5	394	5.95	27
ILMN_1242457	Fpr2	Mus musculus formyl peptide receptor 2 (Fpr2), mRNA.	72.7714	159.454	331.617	74.9169	20.0101	14.3428	42.7028	41.9588	2.37416	139.724	46.8865	32.6709	83.7316	35.8328	1	1	1	1	0	0	1	1	0	1	1	0	1	0	9	0.642857	0	0	0	5.31514	5.31514	13.3407	0	0	0	1	0.701188	402.6	404.6	404.6	404.4	7.04	27
ILMN_2770066	LOC100044439	PREDICTED: Mus musculus similar to cytochrome P450 CYP4F18 (LOC100044439), mRNA.	70.7582	72.3356	134.585	5.99126	4.03486	2.55288	37.648	6.98314	3.32379	46.7038	11.7644	16.3309	33.83	9.09832	1	1	1	0	0	0	1	0	0	1	0	0	0	0	5	0.357143	0	0	0	4.21599	4.21599	8.24062	0	0	0	1	0.616292	383.8	385.8	385.9	385.6	4.82	27
ILMN_2987709	Slc15a3	Mus musculus solute carrier family 15, member 3 (Slc15a3), mRNA.	67.6187	101.427	286.447	79.4084	16.0233	13.6124	59.9497	47.6713	3.04573	145.1	52.8992	7.22129	73.0241	40.5958	1	1	1	1	0	0	1	1	0	1	1	0	1	0	9	0.642857	0.55096	0	0	5.11579	5.66675	12.1952	0.097227	0	0	0.902773	0.686163	399.7	403.7	403.8	403.3	6.53	27
ILMN_2704562	LOC100047628	PREDICTED: Mus musculus similar to Chain L, Structural Basis Of Antigen Mimicry In A Clinically Relevant Melanoma Antigen System, transcript variant 3 (LOC100047628), mRNA.	63.5623	49.0348	24.4176	10.0772	2.34756	15.721	2.58027	10.4597	49.8332	27.5688	20.8692	4.71847	4.98237	10.8587	1	0	0	0	0	0	0	0	1	0	0	0	0	0	2	0.142857	0	0	0.357351	5.95899	6.31634	9.82159	0	0	0.056576	0.943424	0.569375	416.4	420.4	420.6	420	3.32	27
ILMN_1253919	Ccl3	Mus musculus chemokine (C-C motif) ligand 3 (Ccl3), mRNA.	60.0503	101.725	114.663	45.7107	9.89473	13.282	61.6701	13.1788	3.4838	71.0732	14.9638	2.87506	54.7669	15.9083	1	1	1	1	0	0	1	0	0	1	0	0	1	0	7	0.5	0.195451	0	0	3.33165	3.5271	8.89932	0.055414	0	0	0.944586	0.719639	364.9	368.9	369	368.4	7.63	27
ILMN_3009860	Sell	Mus musculus selectin, lymphocyte (Sell), mRNA.	58.3071	50.9332	54.0894	3.75809	2.24987	-1.15331	20.5001	5.5615	2.35448	31.0338	19.1806	6.0572	14.1969	8.66515	1	0	1	0	0	0	0	0	0	0	0	0	0	0	2	0.142857	0	0	0	4.89014	4.89014	7.67079	0	0	0	1	0.521874	395.8	397.8	397.9	397.6	3.27	27
ILMN_3161013	Hk3	Mus musculus hexokinase 3 (Hk3), nuclear gene encoding mitochondrial protein, mRNA.	54.1082	77.1664	90.8617	31.7565	13.9886	17.3237	40.994	38.9709	5.01724	61.7857	11.4403	3.66255	34.1623	12.4942	1	1	1	1	1	1	1	1	0	1	0	0	1	0	10	0.714286	0	0	0	3.40524	3.40525	8.78564	0	0	0	1	0.709306	366.5	368.5	368.6	368.3	7.32	27
ILMN_2433955	Irg1	PREDICTED: Mus musculus immunoresponsive gene 1 (Irg1), mRNA.	54.0342	103.666	174.668	15.4246	3.7493	4.67041	25.8333	6.45738	4.12796	29.8122	11.9997	6.48418	103.064	34.1067	1	1	1	0	0	0	1	0	0	0	0	0	1	1	6	0.428571	0.468742	0	0	4.10475	4.5735	8.98487	0.102491	0	0	0.897509	0.658251	381.9	385.9	386	385.5	5.68	27
ILMN_1225192	Nfkbid	Mus musculus nuclear factor of kappa light polypeptide gene enhancer in B-cells inhibitor, delta (Nfkbid), mRNA.	53.9892	32.1824	58.9962	18.644	5.18995	2.86677	15.2528	7.36635	2.85153	30.6915	15.4405	3.26304	25.555	9.09837	1	1	1	1	0	0	1	0	0	1	0	0	0	0	6	0.428571	0	0	0	3.49263	3.49263	6.91089	0	0	0	1	0.620964	368.6	370.6	370.6	370.3	4.91	27
ILMN_2653132	Clec7a	Mus musculus C-type lectin domain family 7, member a (Clec7a), mRNA.	52.9772	13.9063	73.2573	12.8771	4.83253	3.41438	28.0887	6.73417	4.94053	41.9171	17.7972	4.59897	72.7765	65.5027	1	0	1	1	0	0	1	0	0	1	1	0	1	1	8	0.571429	0.290811	0	0	3.22341	3.51422	7.80751	0.082752	0	0	0.917248	0.691019	362.2	366.2	366.4	365.8	6.39	27
ILMN_2742075	Cd14	Mus musculus CD14 antigen (Cd14), mRNA.	48.1863	44.935	101.457	27.3487	26.4926	8.32168	42.9528	20.0468	3.62796	29.5448	24.5534	6.62017	44.4794	15.022	1	1	1	1	1	0	1	1	0	1	1	0	1	0	10	0.714286	0.239239	0	0	3.28563	3.52487	8.60667	0.067872	0	0	0.932128	0.714198	363.8	367.8	367.9	367.3	7.33	27
ILMN_2721929	Havcr2	Mus musculus hepatitis A virus cellular receptor 2 (Havcr2), mRNA.	46.1137	43.3602	63.1648	38.043	10.0832	8.30195	28.7128	6.23991	12.5715	14.4811	14.5374	4.63569	28.8527	9.46176	1	1	1	1	0	0	1	0	1	0	1	0	1	0	8	0.571429	0.701796	0	0	2.82854	3.53033	7.1868	0.19879	0	0	0.80121	0.706156	351.9	355.9	356.1	355.5	7.1	27
ILMN_2948143	Slc7a11	Mus musculus solute carrier family 7 (cationic amino acid transporter, y+ system), member 11 (Slc7a11), mRNA.	45.8969	68.0725	55.3899	15.6057	7.65276	4.21892	14.7553	6.07338	5.02471	12.7639	8.82808	3.31835	26.2832	7.24256	1	1	1	1	0	0	1	0	0	0	0	0	1	0	6	0.428571	0	0	0	2.80301	2.80301	6.17297	0	0	0	1	0.659441	350.7	352.7	352.8	352.5	5.81	27
ILMN_1214071	Ifitm1	Mus musculus interferon induced transmembrane protein 1 (Ifitm1), mRNA.	45.8794	54.9672	70.9264	19.937	8.85947	2.56565	23.0111	9.66822	3.45116	35.6583	16.1661	1.87502	51.8918	15.9341	1	1	1	1	0	0	1	0	0	1	1	0	1	0	8	0.571429	8.97532	0	0	2.97191	11.9472	7.70656	0.751247	0	0	0.248753	0.713904	357.6	361.6	361.7	361.1	7.17	27
ILMN_2883326	Pira3	Mus musculus paired-Ig-like receptor A3 (Pira3), mRNA.	42.1052	17.9689	159.933	33.3631	16.145	13.2551	29.8877	31.3089	3.14546	69.5944	36.6039	13.0279	52.7512	25.1475	1	0	1	1	0	0	1	1	0	1	1	0	1	0	8	0.571429	0	0	0	4.09734	4.09734	9.62498	0	0	0	1	0.680726	381.5	383.5	383.5	383.3	6.4	27
ILMN_2915303	Trem3	Mus musculus triggering receptor expressed on myeloid cells 3 (Trem3), mRNA.	40.6385	39.7101	86.734	20.0371	3.35274	4.71988	20.2805	3.82511	2.45766	21.7032	7.33959	3.86151	38.0151	5.7581	1	1	1	1	0	0	1	0	0	1	0	0	1	0	7	0.5	0	0	0	2.7616	2.7616	6.36703	0	0	0	1	0.6747	349.5	351.5	351.6	351.3	6.22	27
ILMN_3090207	Cyp4f18	Mus musculus cytochrome P450, family 4, subfamily f, polypeptide 18 (Cyp4f18), mRNA.	39.1645	54.5409	46.3083	5.22648	4.93271	2.07139	20.8437	4.28153	4.67644	16.4966	7.37772	5.2694	9.84529	14.408	1	1	1	0	0	0	1	0	0	0	0	0	0	0	4	0.285714	1.2958	0	0	2.97178	4.26758	5.88711	0.303638	0	0	0.696362	0.623761	356.2	360.2	360.3	359.8	4.88	27
ILMN_2660555	Bcl2a1d		38.2768	52.6356	178.54	50.8008	4.81635	9.89586	33.7679	43.3069	3.84816	170.084	66.1847	7.21621	29.866	28.4796	1	0	1	1	0	0	1	1	0	1	1	0	0	0	7	0.5	4.5226	0	0	5.27908	9.80168	11.2154	0.461411	0	0	0.538589	0.649879	403.1	407.1	407.3	406.7	5.39	27
ILMN_2684370	Igk-C		38.0929	42.8087	22.728	8.07152	2.40934	12.4697	2.17896	8.80379	35.7766	27.1943	17.2635	5.05269	4.73359	9.0493	1	0	0	0	0	0	0	0	1	0	0	0	0	0	2	0.142857	0	0	0.522784	4.85958	5.38236	8.38109	0	0	0.097129	0.902871	0.603772	403.2	407.2	407.4	406.8	3.43	27
ILMN_2617996	Prl2c2	Mus musculus prolactin family 2, subfamily c, member 2 (Prl2c2), mRNA.	37.8941	151.685	700.322	854.431	68.9539	300.183	1319.47	244.154	195.505	1496.07	163.172	31.2542	1194.62	36.303	0	1	1	1	1	1	1	1	1	1	1	0	1	0	11	0.785714	3.29271	0	0	6.28202	9.57473	22.4389	0.343896	0	0	0.656104	0.791456	416.9	420.9	421.1	420.5	11.07	27
ILMN_2704576	Mmp3	Mus musculus matrix metallopeptidase 3 (Mmp3), mRNA.	37.8173	38.3796	334.648	143.253	23.6902	18.8916	300.641	71.4593	28.7149	658.193	31.2114	5.34195	95.6041	154.407	1	0	1	1	1	0	1	1	1	1	1	0	1	1	11	0.785714	0	0	0	4.68613	4.68613	14.416	0	0	0	1	0.756202	392.4	394.4	394.4	394.2	9.31	27
ILMN_1245549	6330404C01Rik		37.0943	33.6647	75.9485	33.4353	9.05064	15.3898	64.8457	8.02819	12.3948	33.156	14.0388	1.92726	11.7577	35.7606	1	1	1	1	0	1	1	0	1	1	1	0	0	1	10	0.714286	0	0	0	2.75072	2.75072	7.5831	0	0	0	1	0.727942	349.2	351.2	351.3	351	8.03	27
ILMN_1224472	Ccl4	Mus musculus chemokine (C-C motif) ligand 4 (Ccl4), mRNA.	37.0512	52.7464	114.887	49.322	8.25988	6.45403	55.042	12.4349	2.18694	96.4895	21.0851	5.35932	42.8919	14.524	1	1	1	1	0	0	1	0	0	1	1	0	1	0	8	0.571429	0	0	0	3.5348	3.5348	8.78084	0	0	0	1	0.698081	369.5	371.5	371.6	371.3	6.94	27
ILMN_2993314	Clec4n	Mus musculus C-type lectin domain family 4, member n (Clec4n), mRNA.	36.8138	54.753	108.852	27.4075	12.865	11.8643	17.8895	56.1485	6.25444	99.1953	27.5055	14.4856	106.82	14.8671	1	0	1	1	0	0	0	1	0	1	0	0	1	0	6	0.428571	2.07806	0	0	5.14331	7.22137	10.5254	0.287766	0	0	0.712234	0.635703	400.6	404.6	404.7	404.2	5.1	27
ILMN_2687586	Cxcl16	Mus musculus chemokine (C-X-C motif) ligand 16 (Cxcl16), mRNA.	36.7596	40.7869	123.955	16.5056	11.7638	7.72	29.93	38.7587	4.40767	78.09	15.3898	4.91554	27.1328	20.4201	1	1	1	0	0	0	1	1	0	1	0	0	0	0	6	0.428571	0	0	0	4.16645	4.16645	8.82257	0	0	0	1	0.645813	382.8	384.8	384.9	384.6	5.47	27
ILMN_1219154	Mt2	Mus musculus metallothionein 2 (Mt2), mRNA.	36.5266	8.2213	13.9927	18.2641	3.48563	3.73964	14.226	5.03311	3.67011	11.3202	7.00787	2.16727	6.69229	9.33592	1	0	1	1	0	0	1	0	0	0	0	0	0	0	4	0.285714	0.897175	0	0	2.09863	2.99581	4.30804	0.299477	0	0	0.700523	0.636895	328	332	332.1	331.6	5.06	27
ILMN_2777319	Stc1	Mus musculus stanniocalcin 1 (Stc1), mRNA.	36.0818	15.9034	16.6071	12.6775	3.94652	6.04482	10.9444	4.57232	15.0057	37.7865	6.90528	5.85898	19.7265	29.9631	1	0	1	1	0	0	1	0	1	1	0	0	0	1	7	0.5	0	0	0	2.99556	2.99556	6.03164	0	0	0	1	0.627519	356.1	358.1	358.2	357.9	5.05	27
ILMN_1255648	Csf3r	Mus musculus colony stimulating factor 3 receptor (granulocyte) (Csf3r), mRNA.	35.0004	47.8816	66.4904	14.4885	4.22842	7.01698	12.6254	10.4841	2.42594	15.538	9.89637	7.32993	52.7196	12.1112	1	1	1	1	0	0	1	0	0	0	0	0	1	0	6	0.428571	0	0	0	2.6695	2.6695	6.38447	0	0	0	1	0.686406	346.8	348.8	348.8	348.6	6.57	27
ILMN_2601215	Cyp7b1	Mus musculus cytochrome P450, family 7, subfamily b, polypeptide 1 (Cyp7b1), mRNA.	33.8252	54.0317	41.2444	20.9393	4.97439	14.2541	19.2006	9.48978	5.31618	58.1242	34.2255	2.67721	20.1704	29.1485	1	1	1	1	0	0	1	0	0	1	1	0	0	1	8	0.571429	2.19799	0	0	3.52328	5.72128	7.6812	0.384179	0	0	0.615821	0.658501	370.2	374.2	374.3	373.7	5.62	27
ILMN_2909597	Havcr2	Mus musculus hepatitis A virus cellular receptor 2 (Havcr2), mRNA.	32.7779	17.3629	51.2543	34.5272	5.19434	6.59535	18.6681	3.80791	17.1184	27.9685	10.3392	3.83271	25.3937	19.164	1	0	1	1	0	0	1	0	1	1	0	0	1	1	8	0.571429	0	0	0	2.76843	2.76843	6.46935	0	0	0	1	0.679052	349.7	351.7	351.8	351.5	6.35	27
ILMN_2847115	Gpr109a	Mus musculus G protein-coupled receptor 109A (Gpr109a), mRNA.	32.7665	40.1205	120.796	3.35711	7.03319	3.15038	31.2512	12.7167	1.56775	32.1928	8.7073	-1.35234	46.9721	15.596	1	1	1	0	0	0	1	0	0	0	0	0	1	0	5	0.357143	1.09503	0	0	3.79918	4.89421	7.38803	0.22374	0	0	0.77626	0.616239	375.9	379.9	380	379.5	4.68	27
ILMN_1249498	Plek	Mus musculus pleckstrin (Plek), mRNA.	32.5103	34.918	112.276	23.4543	10.5407	11.856	40.0186	21.1487	3.28428	87.5337	32.6322	1.77098	20.5424	25.6591	1	1	1	1	0	0	1	1	0	1	1	0	0	0	8	0.571429	4.43598	0	0	3.83784	8.27381	8.85242	0.536147	0	0	0.463853	0.677782	377.5	381.5	381.7	381.1	6.11	27
ILMN_1242739	LOC218617		31.5567	36.8544	143.703	51.6931	9.90392	7.69822	62.8866	25.5261	5.43308	92.5803	33.6947	1.09799	33.3165	23.97	1	1	1	1	0	0	1	1	0	1	1	0	1	0	9	0.642857	3.66667	0	0	3.79873	7.4654	9.27599	0.491155	0	0	0.508845	0.695484	376.5	380.5	380.7	380.1	6.63	27
ILMN_1236702	Lilrb4	Mus musculus leukocyte immunoglobulin-like receptor, subfamily B, member 4 (Lilrb4), mRNA.	31.4372	50.7417	75.733	68.5156	13.3699	16.1641	64.5462	13.9184	4.60299	24.8309	6.04001	4.91969	33.3789	8.16796	1	1	1	1	1	1	1	1	0	1	0	0	1	0	10	0.714286	0.309003	0	0	2.60729	2.9163	7.56642	0.105957	0	0	0.894043	0.74225	345.1	349.1	349.3	348.7	8.5	27
ILMN_2660263	Bcl2a1b	Mus musculus B-cell leukemia/lymphoma 2 related protein A1b (Bcl2a1b), mRNA.	30.7763	31.0639	183.642	53.4138	7.29789	7.2899	33.8936	34.9096	3.89274	144.094	51.5446	7.11726	10.9767	14.8915	1	0	1	1	0	0	1	1	0	1	1	0	0	0	7	0.5	8.25447	0	0	4.63167	12.8861	10.3284	0.64057	0	0	0.35943	0.667022	393.1	397.1	397.2	396.6	5.84	27
ILMN_2959293	Upp1	Mus musculus uridine phosphorylase 1 (Upp1), mRNA.	30.7481	17.1559	70.9313	31.6765	6.3121	7.74666	24.8312	13.9059	3.85893	29.0594	15.9278	2.85077	26.433	11.0127	1	1	1	1	0	0	1	1	0	1	1	0	1	0	9	0.642857	0	0	0	2.25866	2.25866	6.27006	0	0	0	1	0.729828	333.2	335.2	335.3	335	8.1	27
ILMN_1235647	Sox11	Mus musculus SRY-box containing gene 11 (Sox11), mRNA.	30.3874	38.0309	19.1026	9.10034	6.84172	4.00617	6.38081	4.68874	2.92117	2.15168	1.67516	2.82196	2.18429	-1.50959	1	1	1	1	1	0	1	0	0	0	0	0	0	0	6	0.428571	0	0	0	1.57438	1.57438	3.80001	0	0	0	1	0.689268	304	306	306.1	305.8	6.65	27
ILMN_2806180	Csf3r	Mus musculus colony stimulating factor 3 receptor (granulocyte) (Csf3r), mRNA.	29.659	34.4699	35.9389	5.52671	2.43898	2.69821	11.6741	1.19152	1.83219	8.94367	5.72748	2.256	10.6126	7.05164	1	1	1	0	0	0	1	0	0	0	0	0	0	0	4	0.285714	0	0	3.5e-18	2.01907	2.01907	4.37406	0	0	1.73e-18	1	0.653799	324.2	326.2	326.2	326	5.67	27
ILMN_2710905	S100a8	Mus musculus S100 calcium binding protein A8 (calgranulin A) (S100a8), mRNA.	29.6072	25.5591	28.5442	4.96461	2.06463	4.37308	8.45954	5.70232	-1.01489	13.3719	3.3566	4.70748	8.39851	3.73921	1	1	1	0	0	0	1	0	0	0	0	0	0	0	4	0.285714	5.6919	0.070302	0.069098	2.22407	8.05537	5.18627	0.706597	0.008727	0.008578	0.276098	0.696522	338.2	346.2	346.7	345.4	5.88	27
ILMN_2618918	Slc2a6	Mus musculus solute carrier family 2 (facilitated glucose transporter), member 6 (Slc2a6), mRNA.	29.4037	17.9893	100.561	13.8234	9.61322	4.76855	10.3418	15.1598	2.42116	37.8232	8.8881	1.23304	12.4175	22.2002	1	0	1	1	0	0	0	1	0	1	0	0	0	1	6	0.428571	0	0	0	3.0973	3.0973	6.60495	0	0	0	1	0.648298	358.8	360.8	360.9	360.6	5.53	27
ILMN_2728270	B4galnt1	Mus musculus beta-1,4-N-acetyl-galactosaminyl transferase 1 (B4galnt1), transcript variant 1, mRNA.	28.7333	61.7058	40.7104	17.8123	3.87372	2.2449	8.76346	16.8441	3.94832	32.204	15.1692	2.83122	4.34052	10.7154	1	1	1	1	0	0	0	1	0	1	0	0	0	0	6	0.428571	0	0	0.06976	3.32705	3.39681	6.49489	0	0	0.020537	0.979463	0.623545	366.3	370.3	370.4	369.9	4.72	27
ILMN_2788223	Kng1	Mus musculus kininogen 1 (Kng1), mRNA.	28.6651	50.2099	73.8896	5.76372	4.661	18.1982	12.5382	10.5861	5.23474	16.2069	17.5674	6.57687	11.2148	14.0051	1	1	1	0	0	1	1	0	0	0	1	0	0	0	6	0.428571	1.15262	0.047545	0.240828	2.64151	4.0825	6.66214	0.282332	0.011646	0.05899	0.647032	0.729995	354.4	362.4	362.9	361.6	6.36	27
ILMN_2692315	Dpep2		28.1776	33.6173	61.6797	88.4543	9.55503	31.7867	48.8342	12.6111	4.54303	67.7634	10.8585	6.00321	21.1351	17.4897	1	1	1	1	0	1	1	0	0	1	0	0	1	1	9	0.642857	0	0	0	2.85918	2.85918	8.10809	0	0	0	1	0.735525	352.3	354.3	354.4	354.1	8.34	27
ILMN_2904108	Mrgpra2	Mus musculus MAS-related GPR, member A2 (Mrgpra2), mRNA.	28.1361	19.8817	15.0108	3.99872	2.02837	3.24288	21.955	2.50355	1.46796	4.77191	4.64378	1.14417	5.68371	8.0909	1	1	1	0	0	0	1	0	0	0	0	0	0	0	4	0.285714	0	0	0	2.73231	2.73231	5.12478	0	0	0	1	0.600132	348.7	350.7	350.7	350.5	4.5	27
ILMN_2600744	Rgs16	Mus musculus regulator of G-protein signaling 16 (Rgs16), mRNA.	27.1269	13.9085	47.0819	28.9201	24.5794	10.8254	21.0645	5.35867	8.57151	27.3911	5.74059	12.672	13.5981	22.0718	1	0	1	1	1	0	1	0	0	1	0	0	0	1	7	0.5	0	0	0	2.88882	2.88882	6.72755	0	0	0	1	0.67795	353.2	355.2	355.2	355	6.32	27
ILMN_2485839	Tnfrsf1b	Mus musculus tumor necrosis factor receptor superfamily, member 1b (Tnfrsf1b), mRNA.	26.3449	18.187	34.9313	18.0334	5.88687	9.10873	12.1316	7.05942	4.64167	28.3898	10.5343	3.51397	7.40158	14.0606	1	1	1	1	0	0	1	0	0	1	0	0	0	1	7	0.5	0.30499	0	0	2.47377	2.77876	5.45457	0.109758	0	0	0.890242	0.660797	340.9	344.9	345	344.5	5.8	27
ILMN_2735961	Tlr13	Mus musculus toll-like receptor 13 (Tlr13), mRNA.	26.3307	90.8155	68.957	88.0603	76.8164	24.5606	50.2231	23.3136	2.26222	61.6787	24.0789	5.00041	25.1166	22.5248	1	1	1	1	1	1	1	1	0	1	1	0	1	1	12	0.857143	0	0	0.075045	2.35556	2.43061	8.96487	0	0	0.030875	0.969125	0.809441	335.2	339.2	339.4	338.8	11.97	27
ILMN_1251748	Cytip	Mus musculus cytohesin 1 interacting protein (Cytip), mRNA.	25.961	180.335	67.9676	42.3738	8.35199	8.45175	27.7078	32.7035	8.98691	78.5225	43.1257	3.98935	21.1468	10.3442	0	1	1	1	0	0	1	1	0	1	1	0	0	0	7	0.5	4.80747	0	0	4.62475	9.43223	9.75325	0.509686	0	0	0.490314	0.647481	392.5	396.5	396.7	396.1	5.42	27
ILMN_1257574	Esm1	Mus musculus endothelial cell-specific molecule 1 (Esm1), mRNA.	25.7701	16.271	18.2156	23.7626	10.0543	17.651	7.4654	7.51071	12.453	6.74227	7.17896	-1.32174	-1.32348	7.27186	1	0	0	1	0	0	0	0	0	0	0	0	0	0	2	0.142857	0	0	0	3.7118	3.7118	6.14804	0	0	0	1	0.547196	373.5	375.5	375.5	375.3	3.63	27
ILMN_2625125	Cx3cr1		25.7433	18.4698	17.8259	8.36207	2.0102	3.71413	5.9196	8.05983	6.26689	8.79043	10.1862	5.28072	8.25785	22.5101	1	1	1	1	0	0	0	0	0	0	0	0	0	1	5	0.357143	0	0	0	2.33075	2.33075	4.75988	0	0	0	1	0.632751	335.8	337.8	337.8	337.6	5.17	27
ILMN_2657478	Cd53	Mus musculus CD53 antigen (Cd53), mRNA.	25.4259	24.4038	141.301	31.5376	7.80122	4.07091	24.2912	23.0961	5.14391	67.4213	27.4322	4.22939	16.4077	14.3774	1	0	1	1	0	0	1	0	0	1	1	0	0	0	6	0.428571	0	0	0	4.14863	4.14863	8.55881	0	0	0	1	0.63646	382.5	384.5	384.5	384.3	5.25	27
ILMN_1238433	Rbp1		25.1799	5.66863	23.0205	6.34359	10.7549	5.69561	17.5722	5.82618	5.89842	54.5674	8.19915	1.14145	17.272	8.54495	1	0	1	1	1	1	1	1	1	1	1	0	1	1	12	0.857143	0.996897	0	0.397835	1.06469	2.45942	4.46453	0.405338	0	0.16176	0.432902	0.861103	292.5	298.5	298.8	297.9	11.68	27
ILMN_1216871	Lcp1	Mus musculus lymphocyte cytosolic protein 1 (Lcp1), mRNA.	25.0229	26.162	86.91	39.5372	11.3832	9.29352	23.7214	16.4083	2.38144	78.2182	22.7607	6.0081	36.0551	12.2923	1	1	1	1	0	0	1	1	0	1	1	0	1	0	9	0.642857	0.994629	0	0	3.26894	4.26357	7.96982	0.233285	0	0	0.766715	0.693952	363.7	367.7	367.9	367.3	6.53	27
ILMN_2740738	Slc7a11		24.9917	39.4622	39.8747	10.061	7.95642	2.17539	14.8744	7.27211	4.26819	9.41069	6.50602	4.77604	33.0009	5.55438	1	1	1	1	0	0	1	0	0	0	0	0	1	0	6	0.428571	1.47715	0	0	2.58987	4.06702	5.50847	0.363202	0	0	0.636798	0.649865	345.2	349.2	349.3	348.8	5.32	27
ILMN_2624328	Adamts7	Mus musculus a disintegrin-like and metallopeptidase (reprolysin type) with thrombospondin type 1 motif, 7 (Adamts7), mRNA.	24.869	10.2095	22.2002	15.7909	6.58836	11.2998	11.3642	4.62868	5.30032	16.007	4.30436	1.42121	15.1621	11.0015	1	0	1	1	0	1	1	0	0	1	0	0	1	0	7	0.5	0	0	0	2.15902	2.15902	4.70444	0	0	0	1	0.655801	329.6	331.6	331.6	331.4	5.72	27
ILMN_2702141	Mefv	Mus musculus Mediterranean fever (Mefv), mRNA.	24.7366	20.4898	20.3256	8.8128	2.41386	1.69331	8.31744	2.68608	2.09528	6.80848	3.13747	6.92373	5.35554	3.12795	1	1	1	1	0	0	1	0	0	0	0	0	0	0	5	0.357143	0	0	0	1.8717	1.8717	3.70859	0	0	0	1	0.62148	318	320	320.1	319.8	4.93	27
ILMN_1230278	LOC100044702	PREDICTED: Mus musculus similar to LPS-induced CXC chemokine (LOC100044702), mRNA.	24.4079	9.2	15.3525	8.77403	1.15711	1.62102	7.85864	2.18935	5.8483	12.0905	6.74082	2.82373	11.7357	6.1602	1	0	1	1	0	0	0	0	0	0	0	0	0	0	3	0.214286	0	0	0.070503	2.33174	2.40224	4.25881	0	0	0.029349	0.970651	0.601088	338.2	342.2	342.4	341.8	4.17	27
ILMN_2590884	Plaur	Mus musculus plasminogen activator, urokinase receptor (Plaur), mRNA.	24.3007	20.0575	58.6791	31.9907	4.65454	4.65022	20.1955	13.3781	4.32155	29.3414	7.96514	6.64839	35.358	16.382	1	1	1	1	0	0	1	1	0	1	0	0	1	1	9	0.642857	1.15931	0	0	2.64707	3.80638	6.52597	0.30457	0	0	0.69543	0.697682	346.8	350.8	351	350.4	6.73	27
ILMN_2722732	Srgn	Mus musculus serglycin (Srgn), mRNA.	24.1977	23.4054	31.8291	3.95786	3.78796	4.03159	10.2058	-1.03544	1.27547	7.34332	5.03328	3.10106	5.69488	17.1915	1	1	1	0	0	0	1	0	0	0	0	0	0	1	5	0.357143	5.03761	0	0	2.59065	7.62827	4.86606	0.660388	0	0	0.339612	0.604745	346.1	350.1	350.2	349.7	4.18	27
ILMN_3103896	Timp1	Mus musculus tissue inhibitor of metalloproteinase 1 (Timp1), transcript variant 2, mRNA.	24.0598	50.1612	74.3018	89.7052	15.9703	39.2617	196.78	125.116	10.5646	204.544	16.9381	2.92029	229.55	62.2413	0	1	1	1	0	1	1	1	0	1	0	0	1	1	9	0.642857	4.98404	0	0	4.39714	9.38118	12.7325	0.531281	0	0	0.468719	0.74331	388.5	392.5	392.7	392.1	8.27	27
ILMN_1257444	Slc37a1		23.8146	52.3796	75.9591	75.6317	12.959	34.2326	49.597	18.1173	5.49942	61.0421	19.2002	4.03057	39.745	9.04456	1	1	1	1	0	1	1	1	0	1	1	0	1	0	10	0.714286	0	0	0	3.45824	3.45824	8.85486	0	0	0	1	0.70709	367.8	369.8	369.8	369.5	7.24	27
ILMN_2685157	Abcc3	Mus musculus ATP-binding cassette, sub-family C (CFTR/MRP), member 3 (Abcc3), mRNA.	23.6673	5.99267	50.434	30.4641	9.50944	13.7917	20.7981	21.5166	3.22354	40.492	16.3685	5.42372	10.6231	15.0004	1	0	1	1	1	1	1	1	0	1	1	0	0	1	10	0.714286	0	0	0	2.58218	2.58218	6.53715	0	0	0	1	0.703749	344.1	346.1	346.1	345.9	7.13	27
ILMN_2463181	Tnc	Mus musculus tenascin C (Tnc), mRNA.	23.6218	61.0816	29.1364	39.201	14.4789	20.06	92.7182	20.7768	6.50764	65.9165	9.45777	13.1803	128.739	156.187	0	1	1	1	0	0	1	0	0	1	0	0	1	1	7	0.5	3.61473	0	0	4.38032	7.99505	10.6138	0.452121	0	0	0.547879	0.692991	388	392	392.1	391.6	6.4	27
ILMN_2769918	Timp1		23.556	55.4866	90.5285	160.412	12.6419	47.5665	199.416	143.057	6.29818	1315.14	17.3787	4.61669	198.097	415.679	0	1	1	1	0	1	1	1	0	1	0	0	1	1	9	0.642857	6.618	0	0	4.87027	11.4883	15.1111	0.576066	0	0	0.423934	0.760547	396.9	400.9	401.1	400.5	9	27
ILMN_1256824	Gpr171	Mus musculus G protein-coupled receptor 171 (Gpr171), mRNA.	23.5377	33.2504	99.9545	25.329	5.53307	5.85299	27.9044	14.4791	23.7699	54.6822	23.0685	4.49303	15.3291	20.562	1	0	1	1	0	0	1	0	1	1	1	0	0	0	7	0.5	0.07916	0	0	3.8747	3.95386	8.55047	0.020021	0	0	0.979979	0.660324	377	381	381.2	380.6	5.75	27
ILMN_2665666	Pstpip1	Mus musculus proline-serine-threonine phosphatase-interacting protein 1 (Pstpip1), mRNA.	23.0929	73.7208	44.7968	15.4118	7.79809	7.08086	15.0328	18.9191	5.11036	54.6949	17.3477	4.99488	31.9394	19.9234	1	1	1	1	0	0	1	1	0	1	1	0	1	1	10	0.714286	0.4355	0	0	3.20501	3.64051	7.81803	0.119626	0	0	0.880374	0.693451	361.9	365.9	366	365.5	6.52	27
ILMN_2463180	Tnc		22.9998	62.0976	34.3431	69.929	9.48087	13.6471	61.7403	39.1177	5.88175	183.491	7.82871	8.3493	104.216	128.317	1	1	1	1	0	0	1	1	0	1	0	0	1	1	9	0.642857	0.675268	0	0	4.07112	4.74639	10.4694	0.14227	0	0	0.85773	0.70936	381.3	385.3	385.5	384.9	7.08	27
ILMN_2631161	Fcgr4	Mus musculus Fc receptor, IgG, low affinity IV (Fcgr4), mRNA.	22.9345	513.481	1238.63	646.999	86.7926	154.949	155.665	169.404	6.37553	961.338	401.317	10.4109	522.758	166.045	0	1	1	1	1	1	1	1	0	1	1	0	1	1	11	0.785714	5.38281	0	0	8.19192	13.5747	22.0346	0.396531	0	0	0.603469	0.723252	438.5	442.5	442.7	442.1	7.65	27
ILMN_2888552	Slc1a4	Mus musculus solute carrier family 1 (glutamate/neutral amino acid transporter), member 4 (Slc1a4), mRNA.	22.4174	22.5788	25.6267	16.3931	9.08874	12.0503	23.468	19.3328	17.8489	51.8786	21.8309	3.70002	24.1084	20.6163	1	1	1	1	1	1	1	1	1	1	1	0	1	1	13	0.928571	0	0	0	2.42187	2.42187	6.61941	0	0	0	1	0.725595	338.9	340.9	341	340.7	7.93	27
ILMN_1228718	Sdc1	Mus musculus syndecan 1 (Sdc1), mRNA.	21.8646	18.3804	33.7023	13.691	4.81809	9.85974	18.0392	5.38231	9.65318	38.5556	8.30353	3.75922	12.1036	21.2477	1	1	1	1	0	0	1	0	0	1	0	0	0	1	7	0.5	0.129687	0	0	2.52526	2.65495	5.68706	0.048847	0	0	0.951153	0.667413	342.4	346.4	346.6	346	5.97	27
ILMN_1222860	381484	Mus musculus predicted gene, 381484 (381484), mRNA.	21.0979	47.5278	101.281	147.605	7.43968	34.0144	80.4009	7.46996	4.44684	67.4369	20.9576	4.65281	16.8838	6.92469	1	1	1	1	0	1	1	0	0	1	1	0	0	0	8	0.571429	0.846999	0	0	2.87212	3.71912	8.71173	0.227742	0	0	0.772258	0.753982	353.2	357.2	357.4	356.8	8.83	27
ILMN_1246517	Klra17	Mus musculus killer cell lectin-like receptor, subfamily A, member 17 (Klra17), mRNA.	21.0424	33.2327	86.4773	42.8261	5.27364	14.1382	41.3289	14.2634	7.97932	166.426	17.5035	5.14317	43.1244	14.0642	0	0	1	1	0	0	1	0	0	1	0	0	1	0	5	0.357143	0.084607	0	0	4.05332	4.13793	9.15014	0.020447	0	0	0.979553	0.667956	380.7	384.7	384.8	384.2	5.96	27
ILMN_1215807	Glipr1	Mus musculus GLI pathogenesis-related 1 (glioma) (Glipr1), mRNA.	20.9449	11.6031	88.5764	79.6046	6.69248	9.50048	21.9365	29.9576	5.15447	47.9547	11.6635	2.38667	25.4143	26.3532	1	0	1	1	0	0	1	1	0	1	0	0	0	1	7	0.5	0	0	0	3.62458	3.62458	8.07605	0	0	0	1	0.663396	371.6	373.6	373.6	373.4	5.91	27
ILMN_1253947	Traf1		20.5651	20.4194	21.9869	14.0806	4.57718	2.08537	13.1588	6.52047	3.08737	27.2862	8.19532	3.12152	10.3704	7.57467	1	1	1	1	0	0	1	0	0	1	0	0	0	0	6	0.428571	0	0	0	2.80958	2.80958	5.22789	0	0	0	1	0.596934	350.9	352.9	353	352.7	4.44	27
ILMN_2479717	Pilra		20.3506	34.454	199.951	98.2946	6.46074	24.5704	32.4584	21.7622	6.7601	138.711	49.5616	3.4683	44.7826	27.617	0	0	1	1	0	1	1	0	0	1	1	0	1	0	7	0.5	4.34444	0	0	4.237	8.58145	10.3691	0.50626	0	0	0.49374	0.696203	385.4	389.4	389.6	389	6.74	27
ILMN_2959291	Upp1	Mus musculus uridine phosphorylase 1 (Upp1), mRNA.	20.2237	13.8431	54.8797	15.3132	24.9914	9.08084	44.24	39.5697	2.5842	31.8223	17.509	3.69793	25.2072	23.0011	1	0	1	1	1	0	1	1	0	1	1	0	1	1	10	0.714286	0	0	0	3.21126	3.21126	7.56718	0	0	0	1	0.681725	361.8	363.8	363.8	363.5	6.43	27
ILMN_1236868	Idb2		20.2212	15.226	27.3957	12.1921	6.81418	2.8247	14.5219	24.5253	3.76872	18.1605	16.1518	4.28259	16.6733	11.071	1	0	1	1	0	0	1	1	0	0	1	0	0	0	6	0.428571	0	0	0	3.03867	3.03867	5.9895	0	0	0	1	0.6195	357.3	359.3	359.3	359.1	4.88	27
ILMN_2591777	Tmem49	Mus musculus transmembrane protein 49 (Tmem49), mRNA.	20.217	17.2625	18.2323	14.7698	13.3065	5.49293	21.6405	7.524	2.42573	11.2975	7.39333	2.59814	11.0896	8.74576	1	1	1	1	1	0	1	0	0	1	0	0	1	0	8	0.571429	0.683261	0	0	1.76729	2.45055	4.58003	0.278819	0	0	0.721181	0.712293	314	318	318.2	317.6	7.23	27
ILMN_2721149	Arl11	Mus musculus ADP-ribosylation factor-like 11 (Arl11), mRNA.	20.0555	40.0593	57.2221	57.2705	9.56682	29.6416	26.4391	20.8489	3.76456	80.9542	29.5104	4.5451	19.7932	32.0557	1	1	1	1	0	1	1	1	0	1	1	0	0	1	10	0.714286	0.521974	0	0	3.15665	3.67862	8.36043	0.141894	0	0	0.858106	0.717796	360.7	364.7	364.8	364.3	7.48	27
ILMN_2868220	Inhba	Mus musculus inhibin beta-A (Inhba), mRNA.	20.0176	52.7561	69.7478	29.0918	6.31236	7.848	48.4875	13.0853	5.43818	35.5489	5.59718	10.2928	73.1727	82.8344	1	1	1	1	0	0	1	1	0	1	0	0	1	1	9	0.642857	1.71585	0	0	2.33412	4.04998	7.58192	0.42367	0	0	0.57633	0.77091	336.9	340.9	341.1	340.5	9.7	27
ILMN_2756613	Adam8	Mus musculus a disintegrin and metallopeptidase domain 8 (Adam8), mRNA.	19.7229	21.1688	26.6678	18.0207	10.5508	6.92049	21.9474	3.59546	6.8751	17.1009	11.744	3.47372	18.1908	3.03581	1	1	1	1	1	0	1	0	0	1	1	0	1	0	9	0.642857	0	0	0	2.53285	2.53285	5.59598	0	0	0	1	0.660535	342.5	344.5	344.6	344.3	5.84	27
ILMN_3006219	Fyb	Mus musculus FYN binding protein (Fyb), mRNA.	19.621	24.6725	135.773	16.9332	12.8605	6.85936	19.6667	15.4226	3.93404	114.444	33.3838	-1.19192	15.0612	10.7934	1	0	1	1	0	0	1	0	0	1	1	0	0	0	6	0.428571	2.7439	0	0	3.48672	6.23061	7.77041	0.440389	0	0	0.559611	0.666153	369.5	373.5	373.6	373	5.86	27
ILMN_2797726	Steap2	Mus musculus six transmembrane epithelial antigen of prostate 2 (Steap2), mRNA. XM_900299 XM_905527 XM_919398 XM_919422 XM_919426 XM_919434 XM_919444 XM_979606 XM_979649 XM_979723 XM_979751 XM_979777 XM_979804	19.6016	18.3071	29.6745	6.46863	6.11851	10.1162	24.3444	5.9309	5.97476	27.7664	8.76573	3.36149	7.03979	9.36606	1	0	1	0	0	0	1	0	0	1	0	0	0	0	4	0.285714	0	0	0	3.23948	3.23948	5.76002	0	0	0	1	0.578194	362.5	364.5	364.5	364.3	4.11	27
ILMN_2653725	LOC100046802	PREDICTED: Mus musculus similar to Inhbb protein (LOC100046802), mRNA.	19.5724	10.7069	36.5988	13.6004	5.31062	5.19987	14.1231	6.32307	6.42214	18.6211	12.9509	5.82409	9.36211	9.63499	1	0	1	1	0	0	1	0	0	1	1	0	0	0	6	0.428571	0	0	0	2.55231	2.55231	5.30819	0	0	0	1	0.639381	343.1	345.1	345.2	344.9	5.32	27
ILMN_2656504	Retnlg	Mus musculus resistin like gamma (Retnlg), mRNA.	19.505	35.9437	8.99158	2.09911	1.10354	1.47161	5.72764	4.13088	-1.05654	8.15697	1.76611	-1.18258	13.6794	5.89027	1	1	0	0	0	0	0	0	0	0	0	0	0	0	2	0.142857	0.543741	0	0.720333	2.18541	3.44948	5.14465	0.15763	0	0.208823	0.633547	0.745934	351.5	357.5	357.8	356.9	4.31	27
ILMN_2474052	5830411I20		19.4753	38.2919	19.9844	49.6534	6.47374	14.1634	28.2062	18.7719	5.99095	195.488	35.2396	7.28692	20.6929	34.8384	0	0	0	1	0	0	1	0	0	1	1	0	0	1	5	0.357143	0.13595	0	0	4.35024	4.48619	9.01586	0.030304	0	0	0.969696	0.638422	386.4	390.4	390.6	390	5.26	27
ILMN_3118707	Sla	Mus musculus src-like adaptor (Sla), transcript variant 2, mRNA.	19.4073	58.1591	196.243	44.5799	7.53862	20.1045	35.6631	31.865	6.62771	109.011	46.8979	7.04946	35.6781	15.1575	0	1	1	1	0	0	1	0	0	1	1	0	0	0	6	0.428571	0.850125	0	0	5.12058	5.9707	10.8145	0.142383	0	0	0.857617	0.646106	399.9	403.9	404	403.5	5.42	27
ILMN_2765032	Kcnn4	Mus musculus potassium intermediate/small conductance calcium-activated channel, subfamily N, member 4 (Kcnn4), mRNA.	19.4049	25.5072	25.9457	26.2175	4.95952	6.78454	24.7082	14.9252	7.28622	50.4308	18.244	2.04135	8.6512	10.5578	1	1	1	1	0	0	1	1	0	1	1	0	0	0	8	0.571429	0.410119	0	0	2.33839	2.74851	5.93599	0.149215	0	0	0.850785	0.705608	336.4	340.4	340.6	340	6.98	27
ILMN_1218592	Tes	Mus musculus testis derived transcript (Tes), transcript variant 1, mRNA.	19.1693	14.4093	31.7536	12.5115	7.20261	4.57485	14.7731	16.2788	7.67225	23.3249	10.5296	2.96025	14.7768	10.6951	1	1	1	1	1	0	1	1	1	1	1	0	1	1	12	0.857143	0.109141	0	0	1.9065	2.01564	5.04679	0.054147	0	0	0.945853	0.717089	319.6	323.6	323.8	323.2	7.49	27
ILMN_2609813	Chi3l1	Mus musculus chitinase 3-like 1 (Chi3l1), mRNA.	19.1331	41.861	32.959	3.79016	2.3693	1.71594	13.5301	1.84971	-2.35648	3.23291	2.6636	1.59477	2.97667	6.03868	1	1	1	0	0	0	1	0	0	0	0	0	0	0	4	0.285714	2.38691	0.044211	0	1.83228	4.2634	4.60699	0.55986	0.01037	0	0.429771	0.709236	319.3	325.3	325.6	324.6	6.5	27
ILMN_2619330	Plk3		19.1248	7.57581	9.10999	8.40729	5.00892	3.14656	6.76505	6.78795	1.17197	8.96498	7.01467	-2.03766	10.3575	5.44579	1	0	0	1	0	0	0	0	0	0	0	0	0	0	2	0.142857	0.307955	0	0	2.11691	2.42486	3.72659	0.126999	0	0	0.873001	0.575292	328.3	332.3	332.4	331.9	3.99	27
ILMN_2657867	Napsa	Mus musculus napsin A aspartic peptidase (Napsa), mRNA.	19.062	18.8797	35.9632	24.8522	3.12051	3.31148	21.466	4.52518	3.01446	14.4117	4.95797	3.47593	5.46302	4.94442	1	1	1	1	0	0	1	0	0	0	0	0	0	0	5	0.357143	0	0	0	2.58745	2.58745	5.23225	0	0	0	1	0.62911	344.3	346.3	346.3	346	5.09	27
ILMN_2671253	Gspt2	Mus musculus G1 to S phase transition 2 (Gspt2), mRNA.	18.9585	41.8735	22.7229	8.59192	14.4106	1.55006	7.51931	4.90967	7.72878	38.0749	8.96342	1.0277	7.57108	12.6317	1	1	1	1	1	0	1	0	0	1	0	0	0	1	8	0.571429	0	0	0	2.09848	2.09847	4.85632	0	0	0	1	0.675916	327.3	329.3	329.3	329.1	6.26	27
ILMN_2744138	BC003236		18.838	15.6885	18.6953	31.2213	8.90861	9.79079	14.1935	10.6903	6.38884	31.9815	5.01883	1.13951	7.44085	17.022	1	1	1	1	1	1	1	1	0	1	0	0	0	1	10	0.714286	0	0	0	2.18138	2.18138	5.23753	0	0	0	1	0.687633	330.4	332.4	332.5	332.2	6.6	27
ILMN_2996683	Pvrl2	Mus musculus poliovirus receptor-related 2 (Pvrl2), mRNA.	18.8008	17.43	8.31606	14.8509	13.7794	5.06733	9.37787	6.89141	5.1349	12.3263	10.909	1.70093	6.20243	10.2473	1	0	0	1	1	0	1	0	0	0	0	0	0	0	4	0.285714	2.51055	0	0	2.61318	5.12373	4.95286	0.489984	0	0	0.510016	0.607673	346.2	350.2	350.4	349.8	4.4	27
ILMN_2685516	Hcls1	Mus musculus hematopoietic cell specific Lyn substrate 1 (Hcls1), mRNA.	18.6613	21.783	44.9851	27.8909	10.2171	7.69289	16.6257	7.0538	8.87314	60.085	26.7242	5.42228	21.0391	5.91133	0	0	1	1	0	0	1	0	0	1	1	0	0	0	5	0.357143	0	0	0	3.62671	3.62672	7.33944	0	0	0	1	0.629394	371.6	373.6	373.7	373.4	5.09	27
ILMN_2492264	Wisp1	Mus musculus WNT1 inducible signaling pathway protein 1 (Wisp1), mRNA.	18.5664	56.8452	16.9085	74.0681	9.19672	40.3508	97.3413	34.678	11.784	90.5682	10.7964	1.37048	107.784	41.7849	0	1	0	1	0	1	1	1	0	1	0	0	1	1	8	0.571429	4.25622	0	0	3.65276	7.90898	9.89787	0.538151	0	0	0.461849	0.725715	373.5	377.5	377.7	377.1	7.54	27
ILMN_2740902	Mki67	PREDICTED: Mus musculus antigen identified by monoclonal antibody Ki 67 (Mki67), mRNA.	18.5147	18.3643	18.059	10.875	6.37666	4.0043	13.8025	8.82594	5.77209	26.389	10.983	2.60485	7.35181	12.5111	1	0	1	1	0	0	1	0	0	1	0	0	0	0	5	0.357143	0	0	0	2.69131	2.69131	5.1708	0	0	0	1	0.609639	347.4	349.4	349.5	349.2	4.69	27
ILMN_1243862	Il11	Mus musculus interleukin 11 (Il11), mRNA.	18.499	15.986	17.985	2.16736	1.74506	3.2394	4.13567	4.15378	3.65521	7.3513	3.82219	-1.0369	8.52244	2.9883	1	1	1	0	0	0	0	0	0	0	0	0	0	0	3	0.214286	1.21573	0	0	1.85553	3.07126	3.21456	0.395842	0	0	0.604158	0.570316	318.3	322.3	322.4	321.8	3.62	27
ILMN_2888191	Ccr5	Mus musculus chemokine (C-C motif) receptor 5 (Ccr5), mRNA.	18.2421	51.3574	244.535	187.504	14.2286	26.1185	59.9497	29.9467	2.32253	134.479	37.4093	5.76887	89.5445	19.0472	0	1	1	1	1	1	1	1	0	1	1	0	1	0	10	0.714286	0.324793	0	0	3.57827	3.90306	10.7455	0.083215	0	0	0.916785	0.750788	370.7	374.7	374.9	374.3	8.89	27
ILMN_1250438	Marcksl1	Mus musculus MARCKS-like 1 (Marcksl1), mRNA.	18.0562	21.9944	28.7801	18.4276	4.28543	2.76739	10.5007	10.7434	2.4482	32.0659	4.09198	21.6426	12.1468	15.2626	1	1	1	1	0	0	1	0	0	1	0	0	0	0	6	0.428571	0	0	0	2.77226	2.77226	5.71025	0	0	0	1	0.635883	349.8	351.8	351.9	351.6	5.24	27
ILMN_2959191	Inpp5d	Mus musculus inositol polyphosphate-5-phosphatase D (Inpp5d), mRNA.	17.9878	15.2401	33.1721	14.6998	4.49001	6.81163	11.7579	6.9325	12.3756	44.1345	17.7365	5.02364	6.42279	8.85199	1	0	1	1	0	0	1	0	1	1	1	0	0	0	7	0.5	0	0	0.05293	2.83902	2.89195	5.76462	0	0	0.018302	0.981698	0.637276	353.3	357.3	357.4	356.8	5.05	27
ILMN_2646322	Samsn1	Mus musculus SAM domain, SH3 domain and nuclear localization signals, 1 (Samsn1), mRNA.	17.8361	38.5591	41.1815	20.6221	5.01851	3.84711	32.2628	12.0526	1.55331	52.6344	7.20126	-1.06541	24.8091	5.89742	0	1	1	1	0	0	1	0	0	1	0	0	0	0	5	0.357143	0.605528	0	0	3.96804	4.57357	7.06081	0.132397	0	0	0.867603	0.579881	379.2	383.2	383.4	382.8	4.04	27
ILMN_2743013	Ncf4	Mus musculus neutrophil cytosolic factor 4 (Ncf4), mRNA.	17.7885	52.8488	90.3655	12.644	10.5719	4.80105	19.8131	29.0537	4.25934	54.4943	34.336	5.02781	16.6141	13.1798	1	1	1	0	0	0	1	1	0	1	1	0	0	0	7	0.5	0.851693	0	0	3.40888	4.26058	7.73049	0.199901	0	0	0.800099	0.67078	367	371	371.2	370.6	5.99	27
ILMN_2668696	Il13ra1	Mus musculus interleukin 13 receptor, alpha 1 (Il13ra1), mRNA.	17.755	7.10073	35.0885	7.08712	6.34342	3.6552	14.4853	7.91917	3.34927	21.1888	4.78983	1.64337	15.4125	7.27913	1	0	1	0	0	0	1	0	0	1	0	0	1	0	5	0.357143	6.82779	0	0	2.25017	9.07796	4.81362	0.752128	0	0	0.247872	0.653198	335	339	339.2	338.6	5.32	27
ILMN_2712075	Lcn2	Mus musculus lipocalin 2 (Lcn2), mRNA.	17.5832	41.082	61.4941	10.0882	3.02648	3.84784	16.9369	4.30287	-2.21003	27.8454	8.62695	4.38666	12.1204	30.2003	0	1	1	0	0	0	1	0	0	0	0	0	0	1	4	0.285714	0	0	0.105333	3.66351	3.76884	7.33766	0	0	0.027948	0.972052	0.635736	374.7	378.7	378.8	378.3	4.85	27
ILMN_2680398	Zc3h12d	Mus musculus zinc finger CCCH type containing 12D (Zc3h12d), mRNA.	17.529	24.5963	69.7925	15.4284	6.02834	6.3037	10.3138	3.7927	5.45217	45.9619	20.5576	2.33273	14.1998	34.388	0	0	1	1	0	0	0	0	0	1	1	0	0	1	5	0.357143	0	0	0	3.82631	3.82631	7.02247	0	0	0	1	0.591349	375.9	377.9	378	377.7	4.34	27
ILMN_2959292	Upp1	Mus musculus uridine phosphorylase 1 (Upp1), mRNA.	17.3769	18.6172	50.2238	22.2184	10.6546	11.1479	18.2844	5.98728	2.07728	30.7731	11.2412	6.07338	51.8666	21.5653	1	1	1	1	1	0	1	0	0	1	0	0	1	1	9	0.642857	1.53591	0	0	2.58436	4.12026	6.45901	0.372769	0	0	0.627231	0.702065	345	349	349.2	348.6	6.72	27
ILMN_1230586	Traf1	Mus musculus Tnf receptor-associated factor 1 (Traf1), mRNA.	17.361	12.3948	34.3521	8.35674	8.12169	3.62586	5.57148	4.97932	3.63444	27.0502	13.9944	1.26641	7.80284	8.09137	1	0	1	0	0	0	0	0	0	1	1	0	0	0	4	0.285714	0	0	0	2.61649	2.61649	4.94177	0	0	0	1	0.602902	345.2	347.2	347.2	347	4.55	27
ILMN_2866276	Csf2ra	Mus musculus colony stimulating factor 2 receptor, alpha, low-affinity (granulocyte-macrophage) (Csf2ra), mRNA.	17.3459	16.8378	37.158	28.3426	8.32413	5.93038	11.7718	18.8563	5.14789	35.8392	22.0732	10.0767	15.1751	16.3522	1	0	1	1	0	0	0	1	0	1	1	0	0	0	6	0.428571	0	0	0	3.32759	3.32759	6.97364	0	0	0	1	0.642125	364.6	366.6	366.7	366.4	5.38	27
ILMN_2723860	Pkm2		17.3357	21.8491	54.9434	38.7628	11.0262	9.79978	33.0927	7.43367	6.63295	21.8445	11.0445	2.86453	18.8392	5.10142	1	1	1	1	1	0	1	0	0	1	0	0	1	0	8	0.571429	0	0	0	2.6503	2.6503	6.48733	0	0	0	1	0.693599	346.2	348.2	348.3	348	6.79	27
ILMN_2781030	Napsa	Mus musculus napsin A aspartic peptidase (Napsa), mRNA.	17.3288	37.3051	49.1383	21.3541	8.08866	9.44189	28.3792	22.1	5.16823	128.447	33.3843	1.53763	20.9959	20.3565	0	0	1	1	0	0	1	0	0	1	1	0	0	0	5	0.357143	5.63631	0	0	4.62866	10.265	8.85633	0.549082	0	0	0.450918	0.6116	392.7	396.7	396.9	396.3	4.51	27
ILMN_3116885	Gpr137b	Mus musculus G protein-coupled receptor 137B (Gpr137b), mRNA.	17.3156	21.6336	35.2249	17.978	8.01376	13.0488	33.5198	2.53463	8.94797	21.7132	7.02403	2.70966	12.3206	8.70961	1	1	1	1	1	1	1	0	1	1	0	0	0	0	9	0.642857	1.07482	0	0	2.2061	3.28092	5.53249	0.327598	0	0	0.672402	0.702899	332.1	336.1	336.3	335.7	6.86	27
ILMN_2650289	Rin1	Mus musculus Ras and Rab interactor 1 (Rin1), mRNA.	17.2703	12.8343	15.0019	5.55035	10.1518	7.12999	7.19253	5.81196	6.37722	7.70877	5.18134	2.18499	7.4881	3.8166	1	1	1	1	1	1	1	0	1	0	0	0	0	0	8	0.571429	0.273791	0.056292	0	1.44343	1.77351	3.61375	0.154378	0.03174	0	0.813882	0.708025	299.7	305.7	306	305	6.9	27
ILMN_2856926	Gpr114	Mus musculus G protein-coupled receptor 114 (Gpr114), mRNA.	17.1612	31.0022	22.9322	8.88702	8.21591	2.24295	11.285	12.2376	5.01097	42.0879	15.6843	4.00648	8.26492	11.0888	1	1	1	0	0	0	1	0	0	1	1	0	0	0	6	0.428571	7.15881	0	0	2.90726	10.0661	5.78825	0.711182	0	0	0.288818	0.627263	355.6	359.6	359.8	359.2	4.78	27
ILMN_2747060	Coro1a	Mus musculus coronin, actin binding protein 1A (Coro1a), mRNA.	17.1065	42.0092	64.5189	9.06558	4.74859	3.04913	18.6226	17.2557	3.31153	26.4978	19.4089	1.52641	7.26955	10.4422	0	1	1	0	0	0	1	0	0	0	0	0	0	0	3	0.214286	4.273	0	0	4.24843	8.52143	7.40072	0.501442	0	0	0.498558	0.573185	385.6	389.6	389.8	389.2	3.84	27
ILMN_2616196	Sox11		17.0196	8.56211	4.97122	3.25036	4.02074	1.07259	3.75783	3.04544	1.80318	1.5696	2.15857	1.06738	2.06656	-1.3913	1	1	0	0	0	0	0	0	0	0	0	0	0	0	2	0.142857	0	0.034071	0	1.44572	1.47979	2.55278	0	0.023024	0	0.976976	0.582015	298.7	302.7	302.8	302.3	3.99	27
ILMN_1216335	Cttnbp2nl	Mus musculus CTTNBP2 N-terminal like (Cttnbp2nl), mRNA.	17.0084	27.9395	17.6981	9.00783	4.99104	5.45461	12.5377	5.89953	3.71917	21.837	9.51597	3.0387	17.3024	9.20467	1	1	1	1	0	0	1	0	0	1	1	0	1	0	8	0.571429	0	0	0.132559	1.93101	2.06357	4.55541	0	0	0.064238	0.935762	0.701316	325.8	329.8	329.9	329.4	6.17	27
ILMN_2839313	Actg2	Mus musculus actin, gamma 2, smooth muscle, enteric (Actg2), mRNA.	16.8658	2.08267	2.00236	9.50931	1.27599	1.15627	5.62347	13.5135	23.3404	20.8475	4.56092	-2.14947	5.46757	5.41352	1	0	0	0	0	0	0	0	1	0	0	0	0	0	2	0.142857	0	0	0	3.23536	3.23536	5.15255	0	0	0	1	0.529064	362.4	364.4	364.4	364.1	3.37	27
ILMN_2871945	Trem1	Mus musculus triggering receptor expressed on myeloid cells 1 (Trem1), mRNA.	16.8062	18.3601	35.2854	8.96374	1.8067	1.54063	9.57731	1.27209	3.54822	5.95458	3.93251	1.08019	8.31068	1.3855	1	1	1	1	0	0	1	0	0	0	0	0	0	0	5	0.357143	0	0	0	1.84658	1.84657	3.73658	0	0	0	1	0.629358	316.9	318.9	319	318.7	5.09	27
ILMN_1234229	F630001K14Rik		16.7458	5.49734	8.59531	18.1246	6.09971	4.10498	19.2304	5.3331	3.43842	20.2063	4.5762	1.05571	4.58017	5.30153	1	0	0	1	0	0	1	0	0	1	0	0	0	0	4	0.285714	1.67712	0	0	2.06892	3.74604	4.16232	0.447704	0	0	0.552296	0.630216	327.2	331.2	331.4	330.8	4.89	27
ILMN_1246861	Ctss	Mus musculus cathepsin S (Ctss), mRNA.	16.6745	35.23	111.835	30.0551	12.4294	6.37677	43.8438	18.3699	4.40631	40.2123	20.3908	7.8524	29.0151	15.4123	1	1	1	1	1	0	1	1	0	1	1	0	1	0	10	0.714286	3.6827	0	0	2.95421	6.63692	7.74532	0.554882	0	0	0.445118	0.716564	356.4	360.4	360.5	359.9	7.34	27
ILMN_2759365	Angptl4	Mus musculus angiopoietin-like 4 (Angptl4), mRNA.	16.65	6.01098	17.221	3.78801	5.1362	2.86622	8.97741	8.5782	5.39232	15.5169	10.4051	2.43748	6.6364	5.46786	1	0	1	0	0	0	1	0	0	1	1	0	0	0	5	0.357143	0.2623	0	0	2.29458	2.55688	4.15414	0.102586	0	0	0.897414	0.586807	334.8	338.8	338.9	338.3	4.15	27
ILMN_1247377	Mpeg1	Mus musculus macrophage expressed gene 1 (Mpeg1), mRNA.	16.3529	65.4173	124.269	26.1718	20.8382	11.2511	53.1302	48.2155	4.19122	181.715	15.7614	3.66944	17.5711	19.9117	0	1	1	1	1	0	1	1	0	1	0	0	0	0	7	0.5	0.873507	0	0	3.43309	4.3066	8.90827	0.20283	0	0	0.79717	0.712293	367.6	371.6	371.8	371.2	7.29	27
ILMN_2682566	Il1rn	Mus musculus interleukin 1 receptor antagonist (Il1rn), transcript variant 2, mRNA.	16.3489	27.1309	24.9562	5.40225	3.07968	3.0705	19.0727	2.64066	4.10579	1.64069	3.93489	2.59584	15.8202	-1.00154	1	1	1	0	0	0	1	0	0	0	0	0	1	0	5	0.357143	0	0	0	1.71392	1.71392	3.94143	0	0	0	1	0.674879	307.2	309.2	309.3	309	6.15	27
ILMN_3158725	Raet1b	Mus musculus retinoic acid early transcript beta (Raet1b), mRNA.	16.3336	13.3472	10.0912	15.7295	9.25646	9.61525	19.9094	6.90361	3.29024	10.6528	5.31465	3.26957	9.03652	6.01303	1	0	1	1	1	1	1	0	0	0	0	0	0	0	6	0.428571	0	0	0	2.11956	2.11956	4.61902	0	0	0	1	0.655842	328.1	330.1	330.2	329.9	5.72	27
ILMN_1237712	Irg1	PREDICTED: Mus musculus immunoresponsive gene 1 (Irg1), mRNA.	16.0976	19.3796	28.1844	3.22013	1.62178	1.00265	18.5697	-2.02897	5.35666	4.12626	4.52173	1.82938	13.8227	1.08334	1	1	1	0	0	0	1	0	0	0	0	0	1	0	5	0.357143	0	0	0.031634	1.66128	1.69292	3.91197	0	0	0.018686	0.981314	0.688322	306.2	310.2	310.4	309.8	6.25	27
ILMN_2867382	Psd4	Mus musculus pleckstrin and Sec7 domain containing 4 (Psd4), mRNA.	16.0826	20.3661	26.4217	9.24274	6.93829	2.52053	5.04166	4.9089	2.85321	18.794	9.93917	2.07758	6.86503	4.65503	1	0	1	0	0	0	0	0	0	0	0	0	0	0	2	0.142857	0.393674	0	0	3.03025	3.42393	4.8599	0.114977	0	0	0.885023	0.533702	357.3	361.3	361.5	360.9	3.34	27
ILMN_2687165	Chst2	Mus musculus carbohydrate sulfotransferase 2 (Chst2), mRNA.	16.0017	12.6796	14.3266	17.654	4.88995	3.54848	17.4008	5.29415	8.48262	18.3097	9.2649	1.81513	11.6808	8.08805	1	0	1	1	0	0	1	0	0	0	0	0	0	0	4	0.285714	0.811713	0	0	2.96271	3.77442	5.24709	0.215056	0	0	0.784944	0.578563	355.7	359.7	359.9	359.3	3.96	27
ILMN_3161878	Bid	Mus musculus BH3 interacting domain death agonist (Bid), mRNA.	15.9143	10.4416	51.1274	7.21971	5.31172	4.04896	10.7856	20.8518	6.67927	20.3544	12.315	-1.09445	16.6271	11.0427	1	0	1	0	0	0	0	1	0	0	0	0	0	0	3	0.214286	0.300443	0	0	3.11871	3.41916	5.92362	0.08787	0	0	0.91213	0.606029	359.6	363.6	363.7	363.2	4.51	27
ILMN_2875585	Prl2c3	Mus musculus prolactin family 2, subfamily c, member 3 (Prl2c3), mRNA.	15.887	24.1084	291.252	250.245	62.0483	143.504	902.023	122.867	98.3113	319.994	65.4899	10.5407	500.017	22.0412	0	0	1	1	1	1	1	1	1	1	1	0	1	0	10	0.714286	0.746362	0	0	5.2991	6.04546	17.3037	0.123458	0	0	0.876542	0.771021	402.6	406.6	406.8	406.2	9.86	27
ILMN_1212626	EG665509	PREDICTED: Mus musculus predicted gene, EG665509 (EG665509), mRNA.	15.8655	8.45029	23.5112	14.0518	7.22762	5.8176	16.1614	6.34579	2.74795	16.6914	8.75723	1.588	7.98172	10.34	1	0	1	1	1	0	1	0	0	1	1	0	0	1	8	0.571429	2.54023	0	0	1.84169	4.38191	4.36557	0.579707	0	0	0.420293	0.686582	318.2	322.2	322.3	321.7	6.34	27
ILMN_2560567	A630006E02Rik		15.8433	17.604	9.86231	2.48837	2.10351	-1.065	4.71403	9.8512	2.63066	20.5619	14.4195	4.02799	5.26305	4.2242	1	0	0	0	0	0	0	0	0	0	0	0	0	0	1	0.0714286	0.359613	0	0.410178	3.06641	3.83621	5.02835	0.093742	0	0.106923	0.799335	0.591926	367.8	373.8	374.1	373.2	2.89	27
ILMN_2770386	Fhl2	Mus musculus four and a half LIM domains 2 (Fhl2), mRNA.	15.8427	3.24691	8.6138	10.4346	4.84347	20.043	8.35431	7.87593	6.7142	9.40982	2.42793	1.46846	3.40833	5.77015	1	0	0	1	0	1	0	0	0	0	0	0	0	0	3	0.214286	0	0	0	2.46852	2.46852	4.16677	0	0	0	1	0.555677	340.4	342.4	342.5	342.2	3.75	27
ILMN_2582964	E030040J22Rik		15.5302	16.7648	8.21352	3.144	4.54009	-1.07181	6.54621	1.22033	3.60606	2.6308	4.52432	1.736	5.00325	-1.19163	1	1	1	0	0	0	1	0	0	0	0	0	0	0	4	0.285714	0.30365	0	0	1.26697	1.57062	2.47976	0.193332	0	0	0.806668	0.618505	286.9	290.9	291	290.4	4.66	27
ILMN_2768533	Pgf	Mus musculus placental growth factor (Pgf), mRNA.	15.448	1.88361	9.06244	13.2425	4.59887	7.12715	7.64385	3.5534	4.56519	3.10014	4.05619	1.15986	2.55697	2.60037	1	0	1	1	0	1	1	0	0	0	0	0	0	0	5	0.357143	0	0	0	1.48787	1.48787	3.10122	0	0	0	1	0.640174	299.4	301.4	301.5	301.2	5.34	27
ILMN_2918875	Sln	Mus musculus sarcolipin (Sln), mRNA.	15.433	4.93973	3.12163	1.52292	1.99156	2.14043	1.67141	3.07572	1.41361	1.21821	-1.48504	-2.8699	-1.04993	1.09517	1	0	0	0	0	0	0	0	0	0	0	0	0	0	1	0.0714286	0	0	0.103429	1.78439	1.88782	2.39497	0	0	0.054788	0.945212	0.471966	314.9	318.9	319.1	318.5	2.09	27
ILMN_2690551	Nfkbie	Mus musculus nuclear factor of kappa light polypeptide gene enhancer in B-cells inhibitor, epsilon (Nfkbie), mRNA.	15.4141	31.585	35.305	12.9518	1.93324	2.21553	10.7509	7.40308	5.14544	11.8466	8.73132	4.28992	10.8318	11.6401	1	1	1	1	0	0	1	0	0	0	0	0	0	0	5	0.357143	0	0	0	2.64621	2.64621	5.14048	0	0	0	1	0.613916	346.1	348.1	348.1	347.9	4.77	27
ILMN_1232884	Sphk1	Mus musculus sphingosine kinase 1 (Sphk1), transcript variant 1, mRNA.	15.323	32.3718	49.3114	24.7408	8.7063	13.6226	50.0237	16.8482	5.69825	63.4391	6.29563	2.57984	36.8783	31.9861	0	0	1	1	0	0	1	0	0	1	0	0	1	1	6	0.428571	0	0	0	3.95747	3.95747	8.17287	0	0	0	1	0.636835	378.7	380.7	380.7	380.5	5.26	27
ILMN_2751527	Srgn	Mus musculus serglycin (Srgn), mRNA.	15.2443	3.48108	8.32774	3.51991	1.83203	1.45768	12.3843	-1.04431	1.38631	4.66346	1.28409	10.8089	4.78262	1.65036	1	0	0	0	0	0	1	0	0	0	0	0	0	0	2	0.142857	0.577997	0.005664	0	2.13416	2.71782	3.14212	0.212669	0.002084	0	0.785247	0.494293	329.4	335.4	335.7	334.7	2.74	27
ILMN_2678211	Ciita	Mus musculus class II transactivator (Ciita), mRNA.	15.164	35.0174	37.4664	5.8146	4.42513	1.18282	11.2222	13.3484	3.41835	21.7047	16.17	1.11347	10.0396	12.2112	1	1	1	0	0	0	1	0	0	1	1	0	0	0	6	0.428571	0	0	0	2.92232	2.92232	5.31672	0	0	0	1	0.587764	354.1	356.1	356.2	355.9	4.28	27
ILMN_1237466	LOC677008	PREDICTED: Mus musculus similar to 2B4, transcript variant 2 (LOC677008), mRNA.	15.0819	30.0856	90.9783	113.627	8.9274	14.2055	31.6668	8.44428	12.4527	102.506	31.3866	4.8156	18.3241	10.1539	1	1	1	1	0	0	1	0	0	1	1	0	0	0	7	0.5	0	0	0	3.04456	3.04456	8.3332	0	0	0	1	0.725985	357.4	359.4	359.5	359.2	7.95	27
ILMN_1239963	Snx20	Mus musculus sorting nexin 20 (Snx20), mRNA.	15.0295	10.0843	42.3209	25.3003	6.43437	3.68803	13.5756	5.14894	3.07958	19.6188	10.1052	3.11954	20.4468	12.3588	1	0	1	1	0	0	1	0	0	1	0	0	1	0	6	0.428571	0	0	0	2.58179	2.58179	5.44083	0	0	0	1	0.644109	344.1	346.1	346.1	345.9	5.43	27
ILMN_1223697	Cd44	Mus musculus CD44 antigen (Cd44), transcript variant 2, mRNA.	15.0292	28.808	46.0363	31.2166	7.67305	5.98002	26.1725	29.0472	3.69094	48.5265	12.7637	7.51262	31.3248	15.35	1	1	1	1	1	0	1	1	0	1	1	0	1	1	11	0.785714	0	0	0	2.10298	2.10298	6.36115	0	0	0	1	0.752052	327.5	329.5	329.5	329.3	9.1	27
ILMN_1247981	C730046C01Rik		14.8807	37.2827	14.9814	4.63773	5.75597	4.7162	15.5054	11.9222	6.29956	33.4801	9.46925	2.34486	12.2595	5.97225	1	1	1	0	0	0	1	0	0	1	0	0	0	0	5	0.357143	0	0	0	2.75814	2.75814	5.43401	0	0	0	1	0.619323	349.4	351.4	351.5	351.2	4.88	27
ILMN_1230065	LOC245892		14.8797	2.4599	17.182	10.1687	11.4976	13.9818	16.5819	6.23105	5.71215	25.4031	12.0397	2.87697	1.69968	9.38322	1	0	1	1	1	1	1	0	0	1	1	0	0	0	8	0.571429	0	0	0	2.54102	2.54102	5.05134	0	0	0	1	0.62272	342.8	344.8	344.8	344.6	4.95	27
ILMN_3084954	Tes	Mus musculus testis derived transcript (Tes), transcript variant 1, mRNA.	14.8774	12.1535	26.9619	14.9174	9.39049	4.06999	18.5417	10.2009	6.55325	30.3214	7.60501	3.69652	13.4242	10.7698	1	0	1	1	1	0	1	1	0	1	0	0	1	1	9	0.642857	0	0	0	1.98416	1.98416	4.93614	0	0	0	1	0.698525	322.8	324.8	324.8	324.5	6.95	27
ILMN_2920849	Pira4	Mus musculus paired-Ig-like receptor A4 (Pira4), mRNA.	14.8308	13.9365	40.4103	75.9091	5.69028	5.54937	19.4875	16.5706	4.36583	22.1505	16.6861	8.05906	15.6638	5.88765	0	0	1	1	0	0	1	1	0	0	1	0	0	0	5	0.357143	0.867132	0	0	3.3007	4.16783	6.92413	0.208054	0	0	0.791946	0.644157	364.5	368.5	368.6	368	5.22	27
ILMN_2734340	Stx11	PREDICTED: Mus musculus syntaxin 11 (Stx11), mRNA.	14.8059	10.9539	44.8846	16.3627	4.17368	5.29516	8.49044	4.07175	2.76344	30.8023	18.9575	2.81148	24.3267	12.4764	1	0	1	1	0	0	1	0	0	1	1	0	1	1	8	0.571429	0.678928	0	0	1.89319	2.57212	4.88985	0.263957	0	0	0.736043	0.711258	319.6	323.6	323.7	323.1	7.25	27
ILMN_2749717	Bcl3	Mus musculus B-cell leukemia/lymphoma 3 (Bcl3), mRNA.	14.7762	11.0688	16.6849	13.7079	8.31179	2.68882	18.7298	22.1763	7.31651	15.3369	5.86843	7.13088	6.1977	15.0506	1	0	1	1	1	0	1	1	0	1	0	0	0	1	8	0.571429	1.05862	0	0	2.16775	3.22637	5.03372	0.328114	0	0	0.671886	0.679141	330.7	334.7	334.8	334.3	6.12	27
ILMN_2449412	scavenger receptor		14.5505	74.4276	63.7189	45.6676	24.2266	9.34503	59.5331	23.9927	5.41113	39.5297	12.9981	1.48849	33.1208	31.8208	1	1	1	1	1	0	1	1	0	1	1	0	1	1	11	0.785714	1.96326	0	0	2.68842	4.65168	7.92123	0.422054	0	0	0.577946	0.747435	348.4	352.4	352.5	351.9	8.69	27
ILMN_2675669	Cd72	Mus musculus CD72 antigen (Cd72), mRNA.	14.5045	40.2096	680.794	168.977	9.40573	31.3241	32.1779	40.0478	12.615	835.348	69.9366	15.726	15.3206	39.6959	0	0	1	1	0	0	0	0	0	1	0	0	0	0	3	0.214286	0	0	0	8.07085	8.07085	15.7022	0	0	0	1	0.614505	436.4	438.4	438.5	438.2	4.78	27
ILMN_2640457	Pcdhb22	Mus musculus protocadherin beta 22 (Pcdhb22), mRNA.	14.4957	10.9175	8.76984	6.65574	4.06304	3.63027	6.16713	5.36852	2.17348	16.7092	8.9757	-2.99913	4.59925	7.64138	1	1	1	1	0	0	1	0	0	1	1	0	0	1	8	0.571429	0.646347	0	0	1.29335	1.9397	3.02172	0.333221	0	0	0.666779	0.681121	288.9	292.9	293	292.4	6.28	27
ILMN_2702444	Csgalnact1	Mus musculus chondroitin sulfate N-acetylgalactosaminyltransferase 1 (Csgalnact1), mRNA.	14.4949	26.7692	9.75861	27.7547	9.13928	14.3636	14.407	9.40303	2.18117	5.46795	9.01889	1.96514	6.94625	11.1893	1	1	1	1	1	1	1	1	0	0	0	0	0	0	8	0.571429	0	0	0	2.1058	2.1058	4.95416	0	0	0	1	0.681208	327.6	329.6	329.6	329.4	6.41	27
ILMN_1224404	Col12a1	Mus musculus collagen, type XII, alpha 1 (Col12a1), mRNA.	14.4846	30.8957	47.0484	36.1183	6.45054	32.3339	60.3859	14.3753	7.05057	54.8404	9.22884	19.098	24.9638	47.5803	1	1	1	1	0	1	1	1	0	1	0	0	1	1	10	0.714286	0	0	0	2.45247	2.45247	7.42242	0	0	0	1	0.75219	339.9	341.9	342	341.7	9.11	27
ILMN_2794741	EG408196	Mus musculus predicted gene, EG408196 (EG408196), mRNA.	14.4495	11.0487	19.7715	3.35678	1.95746	1.83958	7.17411	1.53395	1.69313	2.07197	1.53842	1.6637	5.68227	4.46826	1	1	1	0	0	0	1	0	0	0	0	0	0	0	4	0.285714	0	0	0.018985	1.70023	1.71922	2.88619	0	0	0.011043	0.988957	0.563009	311.1	315.1	315.3	314.7	3.74	27
ILMN_2825020	Rassf5	Mus musculus Ras association (RalGDS/AF-6) domain family 5 (Rassf5), mRNA.	14.3537	22.213	35.3815	13.4119	5.86495	5.04778	11.3555	11.0143	4.23369	44.4938	19.7352	7.38757	6.64345	5.08313	0	0	1	0	0	0	0	0	0	0	0	0	0	0	1	0.0714286	0	0	0	4.98809	4.98809	7.51918	0	0	0	1	0.502463	397.4	399.4	399.5	399.2	3.03	27
ILMN_2571616	C430002D13Rik		14.3264	19.3693	11.2332	4.54891	4.27362	2.98721	3.45154	2.89537	13.669	12.3537	12.2194	2.81826	5.76878	4.6618	1	1	0	0	0	0	0	0	1	0	0	0	0	0	3	0.214286	0	0	0.061178	2.68764	2.74882	4.59505	0	0	0.022256	0.977744	0.570884	349.1	353.1	353.3	352.7	3.73	27
ILMN_2470646	LOC100048295	PREDICTED: Mus musculus similar to Wilms tumor homolog (LOC100048295), misc RNA.	14.3018	3.84967	11.2628	6.85844	2.23743	6.84903	7.27073	1.58033	8.18975	12.7884	6.5973	2.53026	7.47151	9.76436	1	0	1	1	0	0	1	0	1	1	0	0	0	1	7	0.5	0	0	0	1.77721	1.77721	3.36378	0	0	0	1	0.603747	313.8	315.8	315.9	315.6	4.57	27
ILMN_2793260	Micall2	Mus musculus MICAL-like 2 (Micall2), mRNA.	14.259	6.08082	7.41694	11.5667	6.03846	9.5996	23.7274	5.71935	8.23033	20.1378	5.86935	1.44894	20.8802	31.5695	1	0	0	1	0	1	1	0	1	1	0	0	1	1	8	0.571429	0	0	0	1.9742	1.9742	4.90518	0	0	0	1	0.698147	322.3	324.3	324.4	324.1	6.94	27
ILMN_1219188	Akr1b8	Mus musculus aldo-keto reductase family 1, member B8 (Akr1b8), mRNA.	14.2469	32.8563	20.5683	27.7612	14.23	7.27401	50.2614	23.6112	20.3218	20.2264	14.9386	4.49193	15.3557	19.1246	0	1	1	1	1	0	1	1	1	0	0	0	0	1	8	0.571429	0.506386	0	0	3.09509	3.60148	7.22378	0.140605	0	0	0.859395	0.679753	359.1	363.1	363.2	362.7	6.3	27
ILMN_1241695	Ms4a6d	Mus musculus membrane-spanning 4-domains, subfamily A, member 6D (Ms4a6d), mRNA.	14.2163	28.7203	104.675	50.7431	18.8229	11.3697	43.9393	42.6937	4.8995	50.005	26.4198	6.66073	54.0067	16.471	0	1	1	1	1	0	1	1	0	1	1	0	1	0	9	0.642857	1.2075	0	0	3.11431	4.32181	8.69971	0.279396	0	0	0.720604	0.73309	359.9	363.9	364.1	363.5	8.01	27
ILMN_1255047	Nhedc2	Mus musculus Na+/H+ exchanger domain containing 2 (Nhedc2), mRNA.	14.1848	3.02556	3.59209	3.11143	1.93053	1.50846	3.14893	1.34516	2.38168	10.3283	1.60342	1.72473	1.98536	1.01428	1	0	0	0	0	0	0	0	0	0	0	0	0	0	1	0.0714286	0	0	0	2.32414	2.32414	2.79395	0	0	0	1	0.376114	335.6	337.6	337.6	337.4	1.81	27
ILMN_2774349	LOC100046401	PREDICTED: Mus musculus similar to SDR2 (LOC100046401), misc RNA.	14.0654	4.06992	15.0303	14.051	5.20017	6.29039	11.2882	4.05556	6.40907	14.0539	7.25211	3.23572	7.53862	12.0676	1	0	1	1	0	0	1	0	0	1	0	0	0	1	6	0.428571	0.162193	0	0	1.74795	1.91015	3.82206	0.084911	0	0	0.915089	0.657755	312.7	316.7	316.8	316.3	5.72	27
ILMN_2755666	Apbb1ip		14.0483	48.1178	47.6317	20.3851	9.65436	8.78642	21.0449	10.6078	3.58339	62.1091	12.881	2.14566	12.5169	19.5589	1	1	1	1	0	0	1	0	0	1	0	0	0	1	7	0.5	1.75468	0	0	2.90718	4.66186	6.73799	0.376391	0	0	0.623609	0.678742	354.6	358.6	358.7	358.2	6.11	27
ILMN_2755008	Nfkbiz	Mus musculus nuclear factor of kappa light polypeptide gene enhancer in B-cells inhibitor, zeta (Nfkbiz), mRNA.	14.0291	21.2673	33.6323	16.8045	6.86824	4.81154	10.7279	4.652	2.97238	15.0119	10.3261	1.49919	10.5534	5.6207	1	1	1	1	1	0	1	0	0	1	1	0	0	0	8	0.571429	0.936032	0	0	1.82699	2.76302	4.32538	0.338771	0	0	0.661229	0.685341	316.9	320.9	321	320.4	6.39	27
ILMN_1218799	Emb	Mus musculus embigin (Emb), mRNA.	13.9651	17.5634	23.4713	9.22955	48.0415	5.00519	20.3746	6.17066	4.68809	17.4796	9.8998	1.97981	10.3228	11.7375	1	1	1	1	1	0	1	0	0	1	1	0	1	1	10	0.714286	1.80295	0	0	1.51223	3.31518	4.76215	0.543846	0	0	0.456154	0.764761	298.6	302.6	302.8	302.2	9.23	27
ILMN_2692316	Dpep2	Mus musculus dipeptidase 2 (Dpep2), mRNA.	13.9639	15.0682	35.2164	27.3559	9.59365	25.5062	48.466	21.8858	2.23968	66.7903	26.38	13.1904	14.6639	40.129	0	0	1	1	0	1	1	1	0	1	1	0	0	1	8	0.571429	0	0	0	3.27027	3.27027	8.00677	0	0	0	1	0.693672	363.2	365.2	365.3	365	6.79	27
ILMN_1224005	Adam8	Mus musculus a disintegrin and metallopeptidase domain 8 (Adam8), mRNA.	13.916	34.2255	18.2478	20.0126	7.02277	7.40282	16.4393	5.09321	4.40188	16.7811	5.77061	3.43993	8.87984	3.15264	1	1	1	1	0	0	1	0	0	0	0	0	0	0	5	0.357143	0	0.013074	0	2.75045	2.76353	5.15388	0	0.004731	0	0.995269	0.601485	349.6	353.6	353.7	353.2	4.48	27
ILMN_2750740	LOC100048721	PREDICTED: Mus musculus similar to fibronectin leucine rich transmembrane protein 3, transcript variant 1 (LOC100048721), mRNA.	13.903	31.1833	22.8366	5.90984	5.00247	5.59088	18.8318	7.9082	6.32259	13.7053	8.44077	3.18104	32.4115	10.8496	0	1	1	0	0	0	1	0	0	0	0	0	1	0	4	0.285714	0	0	0	3.63938	3.63938	6.1151	0	0	0	1	0.55364	371.9	373.9	373.9	373.7	3.72	27
ILMN_2731760	Myo1f	Mus musculus myosin IF (Myo1f), mRNA.	13.891	34.7281	59.523	12.1542	6.84742	9.78689	15.0474	11.9891	4.57534	36.8051	22.8485	6.84104	11.2337	17.8156	0	1	1	1	0	0	1	0	0	1	1	0	0	0	6	0.428571	1.70822	0	0	3.05098	4.75919	6.69883	0.35893	0	0	0.64107	0.660802	358.4	362.4	362.6	362	5.73	27
ILMN_2609323	Lst1		13.8888	13.5467	30.6869	15.1491	4.37651	7.73473	22.8519	20.9939	6.08864	18.758	24.3188	4.90006	14.5052	7.28342	1	0	1	1	0	0	1	1	0	1	1	0	0	0	7	0.5	0	0	0	2.58857	2.58857	5.8166	0	0	0	1	0.666226	344.3	346.3	346.3	346.1	5.99	27
ILMN_2585233	Selpl		13.8703	22.4763	42.3628	27.8889	6.76505	5.10461	15.0309	12.4276	6.75305	70.548	11.9397	3.36028	2.47615	12.2705	0	0	1	1	0	0	1	0	0	1	0	0	0	0	4	0.285714	4.65699	0	0.096736	3.28705	8.04078	6.63613	0.579171	0	0.012031	0.408798	0.642139	367.4	373.4	373.7	372.8	4.89	27
ILMN_1239843	LOC100048461	PREDICTED: Mus musculus similar to dendritic cell-associated C-type lectin-1; DECTIN-1 (LOC100048461), mRNA.	13.8108	5.25358	24.932	17.865	5.87106	1.30507	20.4907	3.44523	2.5642	2.01284	2.88956	2.29652	10.5668	3.76487	1	0	1	1	0	0	1	0	0	0	0	0	1	0	5	0.357143	0	0	0	1.7141	1.7141	3.80578	0	0	0	1	0.662205	310.9	312.9	313	312.7	5.88	27
ILMN_1248510	Soat1	Mus musculus sterol O-acyltransferase 1 (Soat1), mRNA.	13.7064	35.9113	25.4043	22.3085	13.939	3.49884	15.7806	21.7988	1.50507	36.8877	6.57607	2.3603	16.2297	10.7814	1	1	1	1	1	0	1	1	0	1	0	0	1	0	9	0.642857	0.794795	0	0	2.27565	3.07044	5.63515	0.258854	0	0	0.741146	0.698806	334.5	338.5	338.6	338	6.69	27
ILMN_2742912	Gpr176	Mus musculus G protein-coupled receptor 176 (Gpr176), mRNA.	13.6805	21.9214	19.1305	29.2025	12.9056	12.1333	14.9304	15.0861	4.31935	74.0931	10.1515	2.92861	3.36413	21.5417	0	0	1	1	1	0	1	0	0	1	0	0	0	1	6	0.428571	0	0	0	3.2324	3.2324	6.67136	0	0	0	1	0.636611	362.3	364.3	364.3	364.1	5.26	27
ILMN_2774410	Stfa1	Mus musculus stefin A1 (Stfa1), mRNA.	13.6519	7.18141	15.6384	1.97433	1.01466	1.58079	22.2205	1.49983	1.21474	2.03981	2.47808	1.02418	10.3805	3.30714	1	0	1	0	0	0	1	0	0	0	0	0	1	0	4	0.285714	0	0.013615	0.159353	1.35287	1.52584	3.28702	0	0.008923	0.104437	0.886641	0.722616	300.9	306.9	307.2	306.3	5.93	27
ILMN_2889832	Serpina3h	Mus musculus serine (or cysteine) peptidase inhibitor, clade A, member 3H (Serpina3h), mRNA.	13.6511	5.2762	16.9352	5.52763	5.66352	1.96248	11.1349	4.18427	6.3503	19.0357	4.27337	2.76172	5.56661	7.4127	1	0	1	0	0	0	1	0	0	1	0	0	0	0	4	0.285714	0	0	0	2.64546	2.64546	4.28242	0	0	0	1	0.536688	346.1	348.1	348.1	347.8	3.48	27
ILMN_2819929	Plod2	Mus musculus procollagen lysine, 2-oxoglutarate 5-dioxygenase 2 (Plod2), mRNA.	13.6086	16.7014	22.3232	33.516	15.355	7.68689	11.3401	6.36926	5.11839	10.7662	12.1647	4.68801	30.3004	7.83115	1	1	1	1	1	0	1	0	0	0	1	0	1	0	8	0.571429	2.21419	0	0	2.04435	4.25853	5.46168	0.519941	0	0	0.480059	0.721755	326.4	330.4	330.6	330	7.58	27
ILMN_1256894	Kcne4	Mus musculus potassium voltage-gated channel, Isk-related subfamily, gene 4 (Kcne4), mRNA.	13.5957	4.86071	10.1965	6.512	2.59458	1.75927	3.19496	4.91903	4.54913	7.16881	2.90301	3.78402	3.25811	3.29379	1	0	1	1	0	0	0	0	0	0	0	0	0	0	3	0.214286	0	0	0.14921	1.49191	1.64112	2.68901	0	0	0.090919	0.909081	0.618682	307.1	311.1	311.2	310.6	3.82	27
ILMN_1231814	Ccl5	Mus musculus chemokine (C-C motif) ligand 5 (Ccl5), mRNA.	13.5912	9.84461	40.2384	2.55199	3.9211	5.59902	8.02355	16.5404	1.22391	4.76376	8.02597	1.03024	-2.40516	6.05664	0	0	1	0	0	0	0	0	0	0	0	0	0	0	1	0.0714286	0	0	0	4.66517	4.66517	5.9999	0	0	0	1	0.416844	392	394	394.1	393.8	2.14	27
ILMN_2863849	C1qtnf3	Mus musculus C1q and tumor necrosis factor related protein 3 (C1qtnf3), mRNA.	13.5794	17.1052	23.1939	30.1206	58.388	14.2548	10.526	7.13654	5.38632	11.0071	9.91749	7.00954	10.7274	5.02974	1	1	1	1	1	1	1	0	0	0	0	0	0	0	7	0.5	0.750784	0	0	2.49093	3.24171	5.86979	0.231601	0	0	0.768399	0.684356	337.7	341.7	341.9	341.3	6.08	27
ILMN_2910934	Cd52	Mus musculus CD52 antigen (Cd52), mRNA.	13.5573	18.9335	56.2049	16.3484	3.91719	5.66588	17.0521	17.3962	3.6394	143.4	18.1503	4.02619	10.8737	9.57895	0	0	1	1	0	0	1	0	0	1	0	0	0	0	4	0.285714	1.34745	0	0.02062	3.8948	5.26286	7.35158	0.256029	0	0.003918	0.740053	0.606897	378.4	384.4	384.7	383.8	4.42	27
ILMN_2422416	Tnfrsf13b		13.4345	19.6501	42.885	12.8301	4.99775	3.56617	7.43225	6.34183	4.6859	27.2497	9.5548	3.34454	6.10673	17.7311	0	0	1	0	0	0	0	0	0	0	0	0	0	0	1	0.0714286	0	0	0.092329	3.82922	3.92155	6.22059	0	0	0.023544	0.976456	0.54895	377.9	381.9	382.1	381.5	3.4	27
ILMN_2699923	Asprv1	Mus musculus aspartic peptidase, retroviral-like 1 (Asprv1), mRNA.	13.3864	8.39191	9.84387	4.14359	-1.13873	-1.86074	6.14597	-1.05112	-2.46071	2.65338	-1.4345	-2.698	2.4234	2.1248	1	0	1	0	0	0	0	0	0	0	0	0	0	0	2	0.142857	0	0	0.62697	1.75542	2.38239	3.30032	0	0	0.263168	0.736832	0.685	334.8	338.8	338.9	338.4	2.97	27
ILMN_1220996	Ptpn6	Mus musculus protein tyrosine phosphatase, non-receptor type 6 (Ptpn6), transcript variant 2, mRNA.	13.3702	13.961	48.8005	26.9909	5.77356	8.30037	13.8602	16.9446	5.13428	47.1232	22.5867	1.46682	10.2657	6.1586	0	0	1	1	0	0	0	0	0	1	0	0	0	0	3	0.214286	7.52376	0	0.010146	4.65693	12.1908	7.77293	0.617165	0	0.000832	0.382002	0.555997	393.6	399.6	399.9	399	3.6	27
ILMN_3124528	Hvcn1	Mus musculus hydrogen voltage-gated channel 1 (Hvcn1), transcript variant 1, mRNA.	13.3686	5.25261	19.3086	5.79079	2.79371	3.34684	6.64164	6.12655	4.55462	36.7006	8.62485	-1.28251	4.85757	13.5277	0	0	1	0	0	0	0	0	0	1	0	0	0	0	2	0.142857	2.89338	0	0.522295	3.26815	6.68382	5.41037	0.432893	0	0.078143	0.488964	0.604773	375.4	381.4	381.7	380.8	2.98	27
ILMN_2650447	Col23a1	Mus musculus procollagen, type XXIII, alpha 1 (Col23a1), mRNA.	13.3515	15.1698	4.81822	1.59246	2.24081	2.7026	-1.18026	4.26819	3.60644	4.66023	2.91107	-2.40664	2.1178	2.71365	1	1	0	0	0	0	0	0	0	0	0	0	0	0	2	0.142857	0	0	0.377689	1.67598	2.05367	2.79188	0	0	0.183909	0.816091	0.620187	324.2	328.2	328.4	327.8	2.78	27
ILMN_1227434	Itgb7	Mus musculus integrin beta 7 (Itgb7), mRNA.	13.2981	41.5152	53.2801	7.17511	7.8371	2.02971	12.7632	24.8866	4.81949	30.476	25.5624	-2.70058	17.9424	6.62881	0	0	1	0	0	0	0	0	0	0	0	0	0	0	1	0.0714286	0	0	0	4.61656	4.61656	7.3247	0	0	0	1	0.527295	391.2	393.2	393.2	392.9	3.35	27
ILMN_2639972	Ppp1r3b	Mus musculus protein phosphatase 1, regulatory (inhibitor) subunit 3B (Ppp1r3b), mRNA.	13.2657	20.3897	9.65198	10.1276	4.04259	4.69793	11.2947	3.76598	1.44105	5.265	7.72254	2.32272	3.01453	5.85695	1	1	0	1	0	0	1	0	0	0	0	0	0	0	4	0.285714	0	0	0	2.24445	2.24445	3.81291	0	0	0	1	0.558517	332.7	334.7	334.8	334.5	3.8	27
ILMN_2837671	Fblim1	Mus musculus filamin binding LIM protein 1 (Fblim1), mRNA.	13.2457	11.6479	6.89643	13.9574	2.4537	2.21545	11.5962	4.71359	4.04055	23.8922	6.60359	1.69712	8.89483	6.08888	1	0	0	1	0	0	1	0	0	1	0	0	0	0	4	0.285714	0	0.014347	0	2.05245	2.06679	4.00119	0	0.006942	0	0.993058	0.617635	326	330	330.2	329.6	4.76	27
ILMN_1258159	Slc2a1	Mus musculus solute carrier family 2 (facilitated glucose transporter), member 1 (Slc2a1), mRNA.	13.2246	9.91995	10.885	10.7123	4.18173	4.45554	11.8115	6.46971	4.8946	12.2712	4.71473	2.92108	8.90079	6.60557	1	1	1	1	0	0	1	1	1	1	0	0	1	1	10	0.714286	0.012459	0	0	1.09374	1.1062	3.06728	0.011263	0	0	0.988737	0.732647	274.5	278.5	278.7	278.1	8.21	27
ILMN_1242383	Atp2b2		13.2182	7.70912	3.19635	2.52762	4.98551	-1.22283	3.47006	2.20247	2.09461	4.3942	6.3415	2.01521	2.67975	1.51285	1	0	0	0	0	0	0	0	0	0	0	0	0	0	1	0.0714286	0	0	0.058394	1.86581	1.9242	2.74487	0	0	0.030347	0.969653	0.505226	320.2	324.2	324.4	323.8	2.74	27
ILMN_1250001	4930583H14Rik	Mus musculus RIKEN cDNA 4930583H14 gene (4930583H14Rik), mRNA.	13.1967	14.1936	32.6481	18.5286	6.18889	4.76723	15.1357	3.35683	6.14328	12.8503	6.76095	-1.30321	7.37478	13.9679	1	1	1	1	0	0	1	0	0	1	0	0	0	1	7	0.5	0	0.046138	0	2.03094	2.07708	4.60147	0	0.022213	0	0.977787	0.674116	326.2	330.2	330.3	329.7	5.99	27
ILMN_2768154	Saa1		13.1857	12.062	19.5017	4.80854	-1.01418	1.3237	11.3399	1.81894	2.11827	3.29726	2.22657	-1.20828	3.91424	3.58976	1	1	1	0	0	0	1	0	0	0	0	0	0	0	4	0.285714	0	0	0.074612	1.61332	1.68794	3.21488	0	0	0.044203	0.955797	0.639586	309.6	313.6	313.7	313.2	4.72	27
ILMN_2502136	Cd40	Mus musculus CD40 antigen (Cd40), transcript variant 5, mRNA.	13.161	20.0209	17.084	4.33268	2.48285	1.26214	7.63379	6.3708	3.70355	17.5699	8.37419	3.86375	3.79596	4.1702	0	0	1	0	0	0	0	0	0	0	0	0	0	0	1	0.0714286	0	0	0	2.92353	2.92353	4.6982	0	0	0	1	0.533301	354.1	356.1	356.2	355.9	3.43	27
ILMN_3083163	Cp	Mus musculus ceruloplasmin (Cp), transcript variant 2, mRNA.	13.0792	8.63123	12.9345	6.10064	1.49419	2.45849	7.68295	2.69718	2.93696	13.3001	3.83148	2.09398	3.44435	5.32015	1	1	1	1	0	0	1	0	0	1	0	0	0	0	6	0.428571	0	0	0	1.08006	1.08006	2.46372	0	0	0	1	0.67121	273.5	275.5	275.5	275.3	6.12	27
ILMN_1230587	Lpxn	Mus musculus leupaxin (Lpxn), mRNA.	13.0204	39.4887	119.538	39.6624	10.1014	6.69136	55.7678	47.4669	4.56965	87.5236	29.3955	1.79711	20.8957	12.6815	0	0	1	1	0	0	1	1	0	1	1	0	0	0	6	0.428571	5.31799	0	0	4.67058	9.98857	9.69801	0.532407	0	0	0.467593	0.642039	393.4	397.4	397.5	397	5.23	27
ILMN_1256299	Gcnt1	Mus musculus glucosaminyl (N-acetyl) transferase 1, core 2 (Gcnt1), mRNA.	12.9855	29.5769	41.4162	6.56784	5.19736	6.1587	4.87074	4.67106	2.76882	19.4532	6.89189	5.52272	10.0345	5.90316	1	1	1	0	0	0	0	0	0	1	0	0	0	0	4	0.285714	0	0	0.132477	2.2118	2.34428	4.70792	0	0	0.056511	0.943489	0.666533	336.1	340.1	340.3	339.7	5.24	27
ILMN_1235934	Btk	Mus musculus Bruton agammaglobulinemia tyrosine kinase (Btk), mRNA.	12.9542	40.8123	107.805	16.2292	5.5333	3.86515	13.3361	20.8034	4.50877	74.6998	22.9914	3.0172	22.8248	16.6823	0	0	1	0	0	0	0	0	0	1	0	0	0	0	2	0.142857	0.855949	0	0	4.34513	5.20108	8.30078	0.164571	0	0	0.835429	0.608931	386.6	390.6	390.8	390.2	4.59	27
ILMN_1254723	Cxcl16	Mus musculus chemokine (C-X-C motif) ligand 16 (Cxcl16), mRNA.	12.9206	3.38972	11.1336	4.88724	5.75071	3.62398	4.83877	3.06577	11.0675	7.45616	8.92066	1.15594	4.75452	10.8905	1	0	1	1	1	0	1	0	1	1	1	0	0	1	9	0.642857	0	0	0	1.18501	1.18501	2.94917	0	0	0	1	0.698641	281	283	283.1	282.8	6.95	27
ILMN_1256025	LOC100041137	PREDICTED: Mus musculus similar to PIRA2 (LOC100041137), misc RNA.	12.9125	16.8075	48.0362	48.7814	7.79938	10.0687	17.653	4.63534	2.88109	31.2966	7.45819	6.39998	10.2099	4.85995	1	1	1	1	0	0	1	0	0	1	0	0	0	0	6	0.428571	1.66488	0	0	2.42592	4.0908	5.81702	0.406981	0	0	0.593019	0.689598	340	344	344.1	343.6	6.32	27
ILMN_1256122	Hdc		12.8873	18.3317	23.6554	4.64256	1.17259	-1.66968	8.23621	-1.0791	1.06948	2.80085	3.83426	3.18186	9.60843	1.56641	1	1	1	1	0	0	1	0	0	0	0	0	1	0	6	0.428571	0.258446	0.00462	0.072159	1.17356	1.50879	3.09397	0.171293	0.003062	0.047826	0.777819	0.732948	285.6	293.6	294.1	292.7	6.66	27
ILMN_2770429	Plod2		12.761	6.32004	16.1571	6.27354	3.27869	6.6186	6.55575	2.61222	9.41646	9.66989	5.02936	2.61918	7.91195	11.5266	1	0	1	0	0	0	0	0	0	0	0	0	0	0	2	0.142857	0	0	0	2.38145	2.38145	4.01442	0	0	0	1	0.555082	337.5	339.5	339.6	339.3	3.74	27
ILMN_2450767	Dusp4		12.7546	17.7326	17.8024	27.7166	6.36147	4.86267	14.6857	4.56519	15.2763	9.40438	9.08084	2.61952	9.69831	14.1978	0	0	1	1	0	0	1	0	1	0	0	0	0	0	4	0.285714	0	0	0	2.85838	2.85838	5.36888	0	0	0	1	0.600701	352.3	354.3	354.4	354.1	4.51	27
ILMN_1228557	Id2	Mus musculus inhibitor of DNA binding 2 (Id2), mRNA.	12.7215	24.0045	35.7049	11.2678	3.83801	2.98908	19.2451	6.26906	3.65692	30.7483	4.9309	1.20865	11.9306	10.8366	1	1	1	1	0	0	1	0	0	1	0	0	0	0	6	0.428571	0	0	0	2.61006	2.61006	5.02127	0	0	0	1	0.61015	345	347	347	346.8	4.7	27
ILMN_1216213	Incenp	Mus musculus inner centromere protein (Incenp), mRNA.	12.7169	11.6821	17.3718	12.9845	6.02299	3.1069	5.56715	3.7104	3.05952	19.2124	6.4307	2.41076	5.75959	6.34447	1	1	1	1	0	0	0	0	0	1	0	0	0	0	5	0.357143	0	0	0.238241	1.88221	2.12045	3.94842	0	0	0.112354	0.887646	0.678742	327.6	331.6	331.8	331.2	4.89	27
ILMN_1216860	A430006M23Rik		12.6766	4.92276	5.68279	11.4156	2.92752	2.56596	3.68381	2.21468	3.76688	2.43041	1.21216	1.02881	2.05058	1.2952	1	0	1	1	0	0	0	0	0	0	0	0	0	0	3	0.214286	0	0.048052	0	1.19377	1.24182	2.22773	0	0.038695	0	0.961305	0.606997	284	288	288.1	287.6	4.34	27
ILMN_1224077	Vav1	Mus musculus vav 1 oncogene (Vav1), mRNA.	12.5873	36.9875	67.6023	16.0765	7.26358	6.07275	20.7961	26.7599	6.56625	100.237	46.7842	7.26143	23.8326	19.0322	0	1	1	1	0	0	1	1	0	1	1	0	0	0	7	0.5	0.712375	0	0	3.75569	4.46806	7.96335	0.159437	0	0	0.840563	0.647624	374.8	378.8	379	378.4	5.45	27
ILMN_2836501	Rdh12	Mus musculus retinol dehydrogenase 12 (Rdh12), mRNA.	12.5008	4.07302	9.51481	2.54683	1.20102	-1.12834	7.07456	1.13611	-1.33068	5.29049	2.55416	-1.23708	4.1233	3.1598	1	0	1	0	0	0	1	0	0	0	0	0	0	0	3	0.214286	0	0	0	1.66616	1.66616	2.4983	0	0	0	1	0.499812	308.6	310.6	310.7	310.4	3	27
ILMN_1232038	Piwil2	Mus musculus piwi-like homolog 2 (Drosophila) (Piwil2), mRNA.	12.4896	2.88352	5.81418	2.16049	2.74442	1.33464	3.66746	2.15973	1.47028	4.443	3.41379	-1.10188	9.39808	2.09832	1	0	0	0	0	0	0	0	0	0	0	0	1	0	2	0.142857	0	0	0	1.4259	1.4259	2.3137	0	0	0	1	0.537785	296	298	298	297.8	3.49	27
ILMN_2727638	LOC100047339	PREDICTED: Mus musculus similar to lysyl oxidase-like 2 (LOC100047339), mRNA.	12.4429	15.9786	30.1049	21.8839	2.96485	11.5502	9.76554	5.16807	2.5076	26.4623	6.50997	1.55517	8.63682	3.02605	1	0	1	1	0	1	1	0	0	1	0	0	0	0	6	0.428571	1.53243	0	0.074396	2.47194	4.07876	4.84189	0.375709	0	0.01824	0.606051	0.630571	343.8	349.8	350.1	349.2	4.68	27
ILMN_1235908	Fabp5	Mus musculus fatty acid binding protein 5, epidermal (Fabp5), mRNA.	12.3812	4.46461	11.6997	6.82884	5.21302	3.5566	5.7007	3.56864	6.11194	13.5054	6.08645	1.79923	2.63956	8.60008	1	0	1	1	0	0	0	0	0	1	0	0	0	0	4	0.285714	0	0	0	1.77236	1.77236	3.29975	0	0	0	1	0.597161	313.6	315.6	315.7	315.4	4.45	27
ILMN_2447991	A730054J21Rik		12.358	31.6273	23.8629	48.0492	8.86487	17.4116	19.0437	4.36695	10.853	13.7701	7.97813	1.47329	16.3517	15.1783	1	1	1	1	1	1	1	0	0	0	0	0	0	1	8	0.571429	5.05362	0	0	2.46772	7.52134	6.47717	0.671904	0	0	0.328096	0.718094	338.2	342.2	342.4	341.8	7.09	27
ILMN_1216368	B3gnt5	Mus musculus UDP-GlcNAc:betaGal beta-1,3-N-acetylglucosaminyltransferase 5 (B3gnt5), mRNA.	12.3542	8.73435	15.1861	1.60127	1.72054	1.1333	6.83168	1.40092	10.2408	4.01778	3.24873	4.51765	4.3574	3.82087	1	0	1	0	0	0	0	0	1	0	0	0	0	0	3	0.214286	0.099853	0	0	2.2697	2.36955	3.40842	0.04214	0	0	0.95786	0.501143	333.7	337.7	337.9	337.3	2.85	27
ILMN_2479681	Mex3a	Mus musculus mex3 homolog A (C. elegans) (Mex3a), mRNA.	12.3373	13.8925	7.21738	2.98088	5.86252	1.06696	4.11023	3.46565	4.52686	8.98758	4.69638	2.25973	2.86023	9.46703	1	1	1	0	1	0	0	0	0	1	0	0	0	1	6	0.428571	0.009268	0	0.056766	1.30446	1.3705	2.73945	0.006763	0	0.04142	0.951818	0.657248	292.2	298.2	298.5	297.6	5.19	27
ILMN_1250260	Il10rb	Mus musculus interleukin 10 receptor, beta (Il10rb), mRNA.	12.3204	5.29782	7.72053	3.15465	5.60798	3.26396	6.83196	6.40767	1.31284	6.60992	5.01691	2.13881	2.71691	4.26445	1	0	0	0	0	0	1	0	0	0	0	0	0	0	2	0.142857	0.110473	0	0	1.83882	1.94929	3.22444	0.056673	0	0	0.943327	0.572944	316.7	320.7	320.9	320.3	3.72	27
ILMN_1222917	Ptpn1	Mus musculus protein tyrosine phosphatase, non-receptor type 1 (Ptpn1), mRNA.	12.2741	5.8998	19.8708	9.67432	6.17826	2.17174	4.76508	1.77356	2.8174	9.22895	7.02148	1.78285	5.77572	7.96514	1	0	1	1	1	0	0	0	0	0	0	0	0	0	4	0.285714	0	0	0	1.67532	1.67532	3.33231	0	0	0	1	0.622938	309	311	311.1	310.8	4.96	27
ILMN_2886646	Il2rg	Mus musculus interleukin 2 receptor, gamma chain (Il2rg), mRNA.	12.1775	1.65546	5.49931	4.69036	1.17199	3.08629	3.64576	2.77233	6.02024	16.0596	2.74951	1.14642	5.31536	3.46415	1	0	0	0	0	0	0	0	0	1	0	0	0	0	2	0.142857	0	0	0	2.26824	2.26824	3.10716	0	0	0	1	0.452498	333.6	335.6	335.6	335.4	2.48	27
ILMN_2820893	Selplg	Mus musculus selectin, platelet (p-selectin) ligand (Selplg), mRNA.	12.1716	38.2512	133.369	20.4122	15.6332	5.05776	20.1412	20.706	6.32046	40.7078	31.1784	6.77879	11.0607	8.2973	0	1	1	1	1	0	1	0	0	1	1	0	0	0	7	0.5	1.66857	0	0	3.88999	5.55856	7.94408	0.30018	0	0	0.69982	0.635014	378	382	382.1	381.6	5.15	27
ILMN_2669164	Arg2	Mus musculus arginase type II (Arg2), mRNA.	12.1716	7.63926	20.6537	2.587	1.6746	1.42736	12.0343	1.36542	1.42804	3.36716	3.55155	2.22463	11.1962	1.08482	1	0	1	0	0	0	1	0	0	0	0	0	0	0	3	0.214286	0	0	0	1.90842	1.90842	3.33145	0	0	0	1	0.570362	319.6	321.6	321.7	321.4	3.98	27
ILMN_1222795	Cmkbr2		12.1196	5.46353	18.9759	13.0803	3.91014	3.28029	8.12732	1.91163	5.28424	2.84968	3.03348	1.94084	4.99667	1.33667	1	0	1	1	0	0	1	0	0	0	0	0	0	0	4	0.285714	0	0	0	1.30937	1.30937	2.94116	0	0	0	1	0.666109	289.1	291.1	291.1	290.9	5.98	27
ILMN_1237886	Enc1	Mus musculus ectodermal-neural cortex 1 (Enc1), mRNA.	11.992	6.17583	13.9006	17.8103	6.10021	2.71787	12.3862	12.1896	4.52284	16.8686	8.04602	1.67791	6.84903	7.49827	0	0	1	1	0	0	1	0	0	0	0	0	0	0	3	0.214286	0	0	0	2.65772	2.65772	4.62363	0	0	0	1	0.568891	346.4	348.4	348.5	348.2	3.96	27
ILMN_2648098	Srgap3	Mus musculus SLIT-ROBO Rho GTPase activating protein 3 (Srgap3), mRNA.	11.9853	16.0185	6.43404	4.18991	5.9955	1.79356	4.25671	3.73997	7.53172	11.9428	4.89192	1.30133	3.62304	14.6495	1	1	0	0	0	0	0	0	0	0	0	0	0	1	3	0.214286	0	0	0	2.16648	2.16648	3.55925	0	0	0	1	0.543482	329.9	331.9	331.9	331.7	3.57	27
ILMN_3154691	Sirpb1	Mus musculus signal-regulatory protein beta 1 (Sirpb1), transcript variant 3, mRNA.	11.9669	29.3496	47.5525	59.4514	9.01395	10.2257	61.9598	4.36982	2.29699	23.4108	7.08246	6.13619	19.5785	1.95865	1	1	1	1	1	0	1	0	0	1	0	0	1	0	8	0.571429	1.15655	0	0	2.51418	3.67073	6.59134	0.315073	0	0	0.684927	0.715752	342.7	346.7	346.8	346.2	7.11	27
ILMN_2789900	Cd177	Mus musculus CD177 antigen (Cd177), mRNA.	11.8982	53.8622	30.6576	12.7994	7.0109	4.65095	13.8165	5.41477	5.60941	8.98053	8.4005	3.21436	20.0121	2.39696	0	1	1	1	0	0	1	0	0	0	0	0	1	0	5	0.357143	0	0	0	2.72964	2.72964	5.39285	0	0	0	1	0.620381	348.6	350.6	350.6	350.4	4.9	27
ILMN_2746456	Tcirg1	Mus musculus T-cell, immune regulator 1, ATPase, H+ transporting, lysosomal V0 protein A3 (Tcirg1), mRNA.	11.8824	24.2251	34.2771	26.7384	7.4562	4.28709	9.21178	14.7184	3.3088	51.6489	16.8596	5.32982	6.10828	14.57	1	1	1	1	0	0	1	1	0	1	1	0	0	1	9	0.642857	0.023922	0	0	2.40173	2.42565	5.72623	0.009862	0	0	0.990138	0.685518	338.2	342.2	342.4	341.8	6.51	27
ILMN_2604521	Cotl1		11.8745	20.7317	40.6448	13.4747	4.18173	3.3213	13.1335	8.97881	4.11613	90.7106	14.964	2.85763	8.61509	6.17141	0	0	1	1	0	0	1	0	0	1	1	0	0	0	5	0.357143	0.361177	0	0	3.02986	3.39103	5.75299	0.106509	0	0	0.893491	0.606068	357.3	361.3	361.4	360.9	4.52	27
ILMN_2825446	Sdcbp2	Mus musculus syndecan binding protein (syntenin) 2 (Sdcbp2), mRNA.	11.8183	1.67153	13.438	5.53652	4.76805	2.8354	5.1649	6.15443	2.71421	4.64614	1.43913	-1.31019	3.88954	1.9253	1	0	1	0	0	0	0	0	0	0	0	0	0	0	2	0.142857	0.398499	0	0.078554	1.84923	2.32629	3.08466	0.171303	0	0.033768	0.794929	0.569647	320.7	326.7	327	326.1	3.2	27
ILMN_2677876	Arhgap4	Mus musculus Rho GTPase activating protein 4 (Arhgap4), mRNA.	11.7426	21.6371	36.5082	3.81901	2.7057	1.92309	5.05531	14.7954	2.60872	29.5564	14.3142	3.91189	5.95568	4.89808	0	0	1	0	0	0	0	0	0	0	0	0	0	0	1	0.0714286	0	0	0	3.84895	3.84895	5.9745	0	0	0	1	0.516828	376.4	378.4	378.5	378.2	3.21	27
ILMN_1246108	Hist1h2ah	Mus musculus histone cluster 1, H2ah (Hist1h2ah), mRNA.	11.7159	20.0844	80.8093	17.4426	5.43711	3.37831	20.1415	16.2284	1.79813	36.106	7.03451	5.18421	5.14178	24.9725	0	0	1	1	0	0	1	0	0	1	0	0	0	0	4	0.285714	0.700986	0	1.36e-17	3.92461	4.6256	7.4826	0.151545	0	2.94e-18	0.848455	0.608055	378.3	382.3	382.5	381.9	4.36	27
ILMN_2929896	Pbk	Mus musculus PDZ binding kinase (Pbk), mRNA.	11.6509	13.7209	22.4711	10.4016	7.89927	5.22208	18.2353	6.24802	3.71753	23.7903	7.13803	-1.18771	8.24756	18.2031	0	0	1	1	0	0	1	0	0	1	0	0	0	1	5	0.357143	0	0	0	2.56201	2.56201	5.20759	0	0	0	1	0.631018	343.5	345.5	345.5	345.2	5.13	27
ILMN_1222543	Ugt1a10	Mus musculus UDP glycosyltransferase 1 family, polypeptide A10 (Ugt1a10), mRNA.	11.5937	8.801	32.0888	9.21702	6.73987	4.81263	14.9182	17.3258	3.33593	26.0378	16.7786	3.44853	9.3868	6.36631	1	0	1	1	0	0	1	1	0	1	1	0	0	0	7	0.5	0.430216	0	0	2.38833	2.81855	5.04164	0.152637	0	0	0.847363	0.646007	338.1	342.1	342.3	341.7	5.38	27
ILMN_2788073	Hmox1	Mus musculus heme oxygenase (decycling) 1 (Hmox1), mRNA.	11.5618	7.58649	20.2556	35.176	46.1098	12.7599	28.5611	14.4333	1.4251	50.9096	22.5761	3.04899	24.2223	4.93785	0	0	0	1	1	0	1	0	0	1	1	0	0	0	5	0.357143	0	0	0	3.92887	3.92887	7.77703	0	0	0	1	0.621108	378.1	380.1	380.1	379.9	4.92	27
ILMN_2897891	Rgs1	Mus musculus regulator of G-protein signaling 1 (Rgs1), mRNA.	11.5001	6.59817	20.3224	21.4532	3.25627	6.82297	14.6617	2.10344	4.20056	8.17697	4.89353	2.44816	15.5068	1.14478	1	0	1	1	0	0	1	0	0	0	0	0	1	0	5	0.357143	0	0	0	2.15096	2.15096	4.41188	0	0	0	1	0.634346	329.3	331.3	331.3	331.1	5.2	27
ILMN_2589164	H2-DMb2	Mus musculus histocompatibility 2, class II, locus Mb2 (H2-DMb2), mRNA.	11.4695	10.9947	100.111	11.6157	7.15306	1.97055	16.9386	26.7066	7.07824	71.4519	28.0801	3.25465	3.94593	12.8687	0	0	1	0	0	0	0	1	0	1	1	0	0	0	4	0.285714	8.68529	0	0	4.37028	13.0556	7.86196	0.665256	0	0	0.334744	0.587329	388.4	392.4	392.6	392	4.09	27
ILMN_2482600	Tnfrsf11a	Mus musculus tumor necrosis factor receptor superfamily, member 11a (Tnfrsf11a), mRNA.	11.4627	5.50382	19.0013	14.4156	6.64348	5.08228	12.0078	11.7652	5.71631	19.1459	11.481	2.81932	6.83607	8.67582	1	0	1	1	1	0	1	1	0	1	1	0	0	0	8	0.571429	0.094585	0	0	1.74859	1.84317	4.23662	0.051316	0	0	0.948684	0.690879	312.6	316.6	316.8	316.2	6.64	27
ILMN_2711772	Micall2	Mus musculus MICAL-like 2 (Micall2), mRNA.	11.424	11.7094	21.6122	26.1863	7.29405	8.98909	8.47786	21.1055	6.04457	36.9645	3.97457	3.13598	7.2501	7.80523	1	0	1	1	0	0	1	1	0	1	0	0	0	0	6	0.428571	0	0	0	2.31955	2.31955	5.18866	0	0	0	1	0.664719	335.4	337.4	337.5	337.2	5.95	27
ILMN_2663930	Slfn1	Mus musculus schlafen 1 (Slfn1), mRNA.	11.4219	107.844	118.386	4.54815	5.57403	1.40669	27.9768	6.68464	3.12954	30.7426	9.34584	5.16529	25.9897	13.6069	0	1	1	0	0	0	1	0	0	0	0	0	0	0	3	0.214286	0	0	0	3.84541	3.84541	7.58341	0	0	0	1	0.619688	376.3	378.3	378.4	378.1	4.89	27
ILMN_2862538	Col12a1	Mus musculus collagen, type XII, alpha 1 (Col12a1), mRNA.	11.4171	29.1414	26.0232	64.5865	5.21324	15.1395	69.1453	23.4392	18.23	65.0961	7.64412	7.08508	113.433	47.1183	0	0	1	1	0	0	1	1	1	1	0	0	1	1	8	0.571429	0	0	0	3.93	3.93	9.23313	0	0	0	1	0.680769	378.1	380.1	380.2	379.9	6.4	27
ILMN_3151503	C130032J12Rik	Mus musculus RIKEN cDNA C130032J12 gene (C130032J12Rik), mRNA.	11.407	24.7513	9.79045	19.4347	4.71213	4.13826	7.70545	14.7698	2.85358	16.8511	7.15152	1.997	14.433	7.33603	1	1	1	1	0	0	1	1	0	1	0	0	1	0	8	0.571429	0	0	0	1.90873	1.90873	4.29468	0	0	0	1	0.666669	319.6	321.6	321.7	321.4	6	27
ILMN_2661340	Slco4a1	Mus musculus solute carrier organic anion transporter family, member 4a1 (Slco4a1), mRNA.	11.3748	24.316	29.3009	13.6308	4.91632	1.92036	13.662	4.11852	8.55036	20.1839	10.9437	2.86146	9.83051	8.62769	1	1	1	1	0	0	1	0	0	1	1	0	0	0	7	0.5	0	0	0	2.38654	2.38654	4.98891	0	0	0	1	0.641224	337.7	339.7	339.8	339.5	5.36	27
ILMN_1215209	Clecsf9		11.3622	6.3715	31.4072	9.16452	1.99435	1.70719	10.155	5.89943	1.28652	2.91178	1.31026	1.38479	3.92339	4.74341	1	0	1	1	0	0	1	0	0	0	0	0	0	0	4	0.285714	0	0	0	2.3558	2.3558	3.64844	0	0	0	1	0.515725	336.7	338.7	338.7	338.5	3.19	27
ILMN_1220101	Ebi2		11.3502	7.01868	26.4684	8.74513	7.00498	1.9029	7.65488	19.5795	6.93687	8.6456	12.4392	1.17325	5.51349	6.32976	0	0	1	0	0	0	0	1	0	0	0	0	0	0	2	0.142857	0.539034	0	0	2.84536	3.38439	4.9793	0.159271	0	0	0.840729	0.573044	352.3	356.3	356.5	355.9	3.83	27
ILMN_2543393	Cdca8	Mus musculus cell division cycle associated 8 (Cdca8), mRNA.	11.3243	15.7037	26.2105	23.2046	10.4217	3.82829	17.3269	13.3593	3.4105	23.6407	20.6605	1.51345	12.7039	12.7519	1	1	1	1	1	0	1	1	0	1	1	0	1	1	11	0.785714	0.861627	0	0	1.71971	2.58134	4.90043	0.333791	0	0	0.666209	0.738554	311.9	315.9	316.1	315.5	8.31	27
ILMN_2954881	Tcirg1	Mus musculus T-cell, immune regulator 1, ATPase, H+ transporting, lysosomal V0 protein A3 (Tcirg1), mRNA.	11.3184	28.3773	18.3989	12.9513	4.83964	4.28279	14.4653	17.6271	3.50943	31.6866	9.64262	2.04907	10.2456	5.60271	1	1	1	1	0	0	1	1	0	1	1	0	0	0	8	0.571429	0	0	0	1.99722	1.99722	4.63573	0	0	0	1	0.676876	323.3	325.3	325.3	325.1	6.28	27
ILMN_2603976	F730031O20Rik		11.317	8.21921	9.44892	2.91428	1.04979	1.04966	4.0125	1.01245	2.23133	4.40508	3.92454	1.50756	2.98556	1.585	1	1	1	0	0	0	1	0	0	0	1	0	0	0	5	0.357143	0.038822	0	0	0.694882	0.733704	1.73071	0.052912	0	0	0.947088	0.699304	237.9	241.9	242	241.5	6.35	27
ILMN_2631423	H2-Ab1	Mus musculus histocompatibility 2, class II antigen A, beta 1 (H2-Ab1), mRNA.	11.3018	24.8993	17.9748	10.6346	3.48873	2.37565	11.358	2.17626	1.9944	11.6458	7.54358	-1.25828	3.63175	9.87547	1	1	1	1	0	0	1	0	0	0	0	0	0	0	5	0.357143	0	0	0	2.08726	2.08726	3.8192	0	0	0	1	0.590112	326.9	328.9	328.9	328.6	4.32	27
ILMN_2473562	Lat2	Mus musculus linker for activation of T cells family, member 2 (Lat2), transcript variant 2, mRNA.	11.2736	15.888	22.726	19.4239	6.52573	6.16735	18.4501	14.5672	3.67	30.3046	22.6317	2.32227	10.514	18.1221	0	0	1	1	0	0	1	0	0	1	1	0	0	0	5	0.357143	5.77365	0	0	3.1442	8.91786	6.30712	0.647426	0	0	0.352574	0.629855	361.7	365.7	365.9	365.3	4.81	27
ILMN_2602352	Ms4a6d	Mus musculus membrane-spanning 4-domains, subfamily A, member 6D (Ms4a6d), mRNA.	11.2527	27.6007	154.799	133.205	12.4125	20.4414	58.8512	16.3351	2.35992	37.2887	10.7157	5.73107	22.5538	13.8757	0	1	1	1	1	1	1	1	0	1	0	0	0	0	8	0.571429	0.302609	0	0	3.18571	3.48831	8.67917	0.086749	0	0	0.913251	0.725328	361.3	365.3	365.5	364.9	7.74	27
ILMN_2644515	Srpx2	Mus musculus sushi-repeat-containing protein, X-linked 2 (Srpx2), transcript variant 2, mRNA.	11.2241	9.02379	14.0939	12.4395	4.67459	4.36067	13.9379	5.88065	4.33644	14.1775	4.23673	3.39886	5.02028	1.05665	1	0	1	1	0	0	1	0	0	1	0	0	0	0	5	0.357143	0	0	0	2.0515	2.0515	4.01194	0	0	0	1	0.616489	325.5	327.5	327.5	327.2	4.82	27
ILMN_2763002	Eno2	Mus musculus enolase 2, gamma neuronal (Eno2), mRNA.	11.2027	9.16965	16.2986	33.8124	11.2222	5.06671	19.7399	14.7018	5.8916	32.7904	9.29803	3.39023	23.9979	13.9434	1	0	1	1	1	0	1	1	0	1	0	0	1	1	9	0.642857	0	0	0	2.25746	2.25746	5.41944	0	0	0	1	0.687588	333.2	335.2	335.3	335	6.6	27
ILMN_1221121	Gpr35	Mus musculus G protein-coupled receptor 35 (Gpr35), mRNA.	11.1725	17.7695	14.2986	5.46181	5.50766	3.17708	7.92736	3.80818	2.19162	13.7088	8.47918	8.93603	9.26185	14.0442	1	1	1	0	0	0	1	0	0	1	1	0	0	1	7	0.5	0	0	0	1.74931	1.74931	3.69965	0	0	0	1	0.645376	312.5	314.5	314.6	314.3	5.46	27
ILMN_2585275	F630038O13Rik		11.1707	6.37504	1.86287	2.95705	3.8232	3.69782	3.73446	3.54577	4.51476	8.99714	3.47762	1.05532	4.91367	3.87105	1	0	0	0	0	0	0	0	0	0	0	0	0	0	1	0.0714286	0	0	0	1.80983	1.80983	2.81182	0	0	0	1	0.517262	315.3	317.3	317.4	317.1	3.21	27
ILMN_1231309	Ly9	Mus musculus lymphocyte antigen 9 (Ly9), mRNA.	11.1537	16.6806	49.4124	7.76034	10.2959	4.22866	5.5789	21.7535	3.35534	12.7303	22.295	1.36876	4.15006	12.0942	0	0	1	0	0	0	0	1	0	0	1	0	0	0	3	0.214286	0	0	0.464286	3.32019	3.78448	6.42908	0	0	0.122682	0.877318	0.655195	374.5	378.5	378.6	378	4.15	27
ILMN_2562725	C730013O11Rik		11.1533	24.8935	8.05983	11.9379	13.2012	4.01876	6.50956	6.22274	2.64309	31.6558	19.3093	2.84741	6.2208	17.4804	1	1	0	1	1	0	0	0	0	1	1	0	0	1	7	0.5	0	0	0	2.38326	2.38326	4.90967	0	0	0	1	0.635933	337.6	339.6	339.6	339.4	5.24	27
ILMN_2829594	Hspa1a	Mus musculus heat shock protein 1A (Hspa1a), mRNA.	11.0584	10.1892	7.19827	10.6292	2.90988	1.40715	4.31901	1.52891	2.10894	2.58925	1.92019	-1.54415	2.47261	1.48178	1	1	1	1	0	0	0	0	0	0	0	0	0	0	4	0.285714	0	0	0.268638	1.39908	1.66772	2.82515	0	0	0.161081	0.838919	0.680419	307.7	311.7	311.8	311.2	4.11	27
ILMN_2608502	9530019H20Rik		11.0494	5.78573	5.06487	2.50561	5.85415	1.17257	4.68828	1.83213	4.01179	12.8595	5.12029	2.97698	2.36805	1.10961	1	0	0	0	0	0	0	0	0	1	0	0	0	0	2	0.142857	0	0	0	2.00516	2.00516	3.01871	0	0	0	1	0.501816	323.6	325.6	325.7	325.4	3.02	27
ILMN_2930203	Ugt1a10	Mus musculus UDP glycosyltransferase 1 family, polypeptide A10 (Ugt1a10), mRNA.	11.042	15.0428	42.409	25.5821	12.2998	4.41902	23.6876	5.26561	3.17921	31.1451	13.3816	3.66382	4.69286	11.8339	0	0	1	1	1	0	1	0	0	1	0	0	0	0	5	0.357143	0	0	0	3.05805	3.05805	6.15683	0	0	0	1	0.62748	357.8	359.8	359.8	359.6	5.05	27
ILMN_2993836	Dlg3	Mus musculus discs, large homolog 3 (Drosophila) (Dlg3), mRNA.	11.042	19.4092	6.53959	10.3324	2.51239	5.62782	6.55438	2.74584	3.16165	5.38893	6.25929	1.23817	5.0146	2.65549	1	1	0	1	0	0	1	0	0	0	0	0	0	0	4	0.285714	0	0	0.172183	1.74031	1.91249	3.42575	0	0	0.090031	0.909969	0.650569	319.5	323.5	323.6	323	4.42	27
ILMN_3161790	AI451557	Mus musculus expressed sequence AI451557 (AI451557), mRNA.	11.0381	9.83142	69.9426	6.4292	11.1382	2.66748	5.35854	8.52411	4.05262	22.9364	11.5083	1.79493	3.67387	6.11902	0	0	1	0	0	0	0	0	0	0	0	0	0	0	1	0.0714286	3.55715	0	0	3.18165	6.7388	5.2954	0.527861	0	0	0.472139	0.553397	362.3	366.3	366.4	365.9	3.6	27
ILMN_2591781	Tmem49	Mus musculus transmembrane protein 49 (Tmem49), mRNA.	10.9784	26.1565	18.3219	23.5638	7.89719	6.46679	14.7872	3.04349	5.60889	11.5389	7.23228	3.0356	11.7224	4.20163	1	1	1	1	1	0	1	0	0	0	0	0	0	0	6	0.428571	0	0	0	2.13991	2.13991	4.70114	0	0	0	1	0.658608	328.9	330.9	330.9	330.7	5.79	27
ILMN_2672353	Dennd1c	Mus musculus DENN/MADD domain containing 1C (Dennd1c), mRNA.	10.9632	8.47727	17.4957	14.114	5.1337	1.87791	6.70538	9.82801	4.00544	32.0274	10.3426	2.948	6.66652	4.50408	0	0	1	1	0	0	0	0	0	1	0	0	0	0	3	0.214286	0.843859	0	0.030385	2.51043	3.38467	4.53986	0.249318	0	0.008977	0.741705	0.592346	343.3	349.3	349.7	348.7	4.17	27
ILMN_2590917	Aim1		10.9608	27.8428	30.5865	26.9763	12.1548	5.82194	11.3657	8.59323	3.48729	35.4194	7.21625	1.00812	9.50179	3.4725	0	1	1	1	1	0	1	0	0	1	0	0	0	0	6	0.428571	0	0	0	2.80681	2.80681	5.64498	0	0	0	1	0.627084	350.8	352.8	352.9	352.6	5.04	27
ILMN_1219106	Rrad		10.9153	8.67923	12.5664	4.98516	2.93057	1.9183	4.98178	3.25059	4.67696	1.25206	1.98123	2.59842	1.5334	1.4241	0	0	1	0	0	0	0	0	0	0	0	0	0	0	1	0.0714286	0	0.005035	0	2.45509	2.46012	3.25691	0	0.002047	0	0.997953	0.435756	340.2	344.2	344.3	343.7	2.3	27
ILMN_2993109	Ddit4	Mus musculus DNA-damage-inducible transcript 4 (Ddit4), mRNA.	10.9147	5.58813	9.27952	4.79962	4.93004	3.95259	12.7339	7.99169	6.17851	29.7002	5.1001	3.76226	6.01807	5.02048	1	0	1	0	0	0	1	1	0	1	0	0	0	0	5	0.357143	0	0	0	1.55374	1.55374	3.57023	0	0	0	1	0.673606	302.9	304.9	305	304.7	6.19	27
ILMN_3155815	9830134C10Rik	Mus musculus RIKEN cDNA 9830134C10 gene (9830134C10Rik), mRNA.	10.8979	13.2244	10.9066	-1.07149	1.46139	-1.52771	6.96103	1.65651	4.35904	2.96816	4.99808	1.80081	10.3405	-1.28113	1	1	1	0	0	0	1	0	1	0	1	0	1	0	7	0.5	0	0	0.259622	0.855212	1.11483	2.42477	0	0	0.23288	0.76712	0.785874	273.9	277.9	278	277.5	6.78	27
ILMN_2595857	Ankrd37	Mus musculus ankyrin repeat domain 37 (Ankrd37), mRNA.	10.8771	2.0175	5.62479	3.9892	4.78076	4.33333	4.70632	4.24327	3.44152	3.54348	1.77408	1.96395	2.97805	2.70025	1	0	1	0	1	0	1	0	0	0	0	0	0	0	4	0.285714	0	0.079379	0	1.01209	1.09147	2.08831	0	0.072727	0	0.927273	0.647515	272	276	276.2	275.6	4.96	27
ILMN_1250195	Ndrg1	Mus musculus N-myc downstream regulated gene 1 (Ndrg1), mRNA.	10.8258	4.80732	9.07832	8.2843	5.11353	3.97037	8.14435	4.45932	4.40874	9.06768	5.78483	1.87659	6.63456	5.92607	1	0	1	1	1	0	1	1	1	1	1	0	1	1	11	0.785714	0.334793	0	0	0.92299	1.25778	2.55184	0.266177	0	0	0.733823	0.730263	261.4	265.4	265.5	265	7.87	27
ILMN_1235139	Sfpi1	Mus musculus SFFV proviral integration 1 (Sfpi1), mRNA.	10.7936	13.5909	15.4151	19.0503	3.46996	4.73889	14.8806	3.85465	1.79358	15.3812	13.9281	7.85775	11.5099	2.24777	1	1	1	1	0	0	1	0	0	1	1	0	0	0	7	0.5	0	0	0	1.95833	1.95833	4.11281	0	0	0	1	0.642885	321.7	323.7	323.7	323.5	5.4	27
ILMN_2441335	Abcg1		10.7923	20.8109	37.3918	31.2287	9.93624	20.4177	25.5842	20.6229	3.59078	80.4061	33.0998	3.68205	8.99797	18.0549	0	0	1	1	0	0	1	0	0	1	1	0	0	0	5	0.357143	0	0	0.036491	3.9197	3.95619	7.92142	0	0	0.009224	0.990776	0.632276	378.6	382.6	382.8	382.2	5.05	27
ILMN_1236648	A430073A17Rik		10.788	19.8959	6.49037	5.03224	7.26358	2.11906	2.55308	3.85058	3.11739	14.6507	5.84337	3.40424	7.54995	6.38882	1	1	0	0	1	0	0	0	0	1	0	0	0	0	4	0.285714	0.90784	0	0.589696	1.71289	3.21043	3.77558	0.282778	0	0.183681	0.53354	0.730896	332.7	338.7	339	338.1	4.26	27
ILMN_2741935	H2-Ea	Mus musculus histocompatibility 2, class II antigen E alpha (H2-Ea), mRNA.	10.7809	14.1933	40.6526	5.44646	3.7582	1.79365	9.40573	14.7128	3.20602	15.8748	10.7936	1.87158	6.18454	8.6477	1	0	1	0	0	0	1	1	0	1	1	0	0	0	6	0.428571	2.11102	0	0	2.22203	4.33305	4.45256	0.48719	0	0	0.51281	0.6289	333.1	337.1	337.2	336.7	4.9	27
ILMN_1253854	Tgif1	Mus musculus TGFB-induced factor homeobox 1 (Tgif1), mRNA.	10.7745	5.49797	9.89397	20.7319	5.79007	2.10173	6.88693	1.70235	-1.16381	19.2315	9.32174	5.24921	2.75904	2.83753	1	0	1	1	0	0	0	0	0	1	1	0	0	0	5	0.357143	0	0	0	2.01714	2.01714	3.81349	0	0	0	1	0.603288	324.1	326.1	326.1	325.9	4.56	27
ILMN_1248830	Hist1h2an	Mus musculus histone cluster 1, H2an (Hist1h2an), mRNA.	10.7519	13.3296	20.3859	9.05177	6.21597	3.45019	12.9678	11.3873	2.47355	18.6172	16.0622	-1.53077	12.9873	10.3449	0	0	1	0	0	0	1	0	0	0	0	0	0	0	2	0.142857	0.390376	0	0	3.39398	3.78436	5.90618	0.103155	0	0	0.896845	0.570138	366.5	370.5	370.6	370.1	3.82	27
ILMN_1226048	AI504432		10.751	19.5595	61.9701	20.5941	4.21982	2.68082	17.7047	5.35737	6.02909	25.0036	6.88139	3.22225	8.33356	2.23394	0	1	1	1	0	0	1	0	0	1	0	0	0	0	5	0.357143	0	0	0	2.55588	2.55588	5.37127	0	0	0	1	0.643118	343.3	345.3	345.3	345.1	5.41	27
ILMN_2619408	Atf3	Mus musculus activating transcription factor 3 (Atf3), mRNA.	10.7402	3.54848	14.0403	15.9577	9.8609	5.06785	20.7523	8.14492	2.02724	25.2271	2.43914	1.69241	18.3754	9.2983	0	0	0	1	0	0	1	0	0	0	0	0	0	0	2	0.142857	0	0	0	3.55538	3.55538	5.75636	0	0	0	1	0.536766	370	372	372	371.8	3.48	27
ILMN_2717716	Rapgef5		10.7356	15.1709	3.98278	3.36909	5.78638	2.32181	3.83769	2.24875	3.34852	10.423	4.55918	1.27227	3.90584	3.66853	1	1	0	0	1	0	0	0	0	1	0	0	0	0	4	0.285714	0.739776	0	0.276788	1.28446	2.30103	2.55658	0.321498	0	0.120289	0.558213	0.681948	302.8	308.8	309.1	308.1	4.16	27
ILMN_1214631	Adck4		10.7146	5.39541	10.3717	2.31758	1.29972	2.48045	4.14997	3.82524	1.91095	11.075	4.56938	1.5371	3.16462	5.14727	1	0	1	0	0	0	0	0	0	0	0	0	0	0	2	0.142857	0	0	0.229196	1.9599	2.18909	3.10324	0	0	0.104699	0.895301	0.571397	330.3	334.3	334.4	333.9	2.85	27
ILMN_2996648	Prl2c4	Mus musculus prolactin family 2, subfamily c, member 4 (Prl2c4), mRNA.	10.6853	43.2941	160.13	320.611	40.2992	108.147	711.165	56.4548	124.043	259.358	59.9973	8.95939	314.083	15.7339	0	0	1	1	1	1	1	1	1	1	1	0	1	0	10	0.714286	0.594329	0	0	5.08989	5.68422	16.0112	0.104558	0	0	0.895442	0.762208	399.3	403.3	403.5	402.9	9.42	27
ILMN_2642133	Sipa1	Mus musculus signal-induced proliferation associated gene 1 (Sipa1), mRNA.	10.6476	3.18546	4.62884	3.32796	6.36773	1.02363	3.7878	2.12038	4.46219	3.21332	3.716	1.79762	2.457	2.37055	1	0	0	0	1	0	0	0	0	0	0	0	0	0	2	0.142857	0	0	0.150266	1.39273	1.54299	2.40986	0	0	0.097386	0.902614	0.60516	302	306	306.2	305.6	3.42	27
ILMN_2918977	2019-03-01	Mus musculus membrane-associated ring finger (C3HC4) 1 (March1), mRNA.	10.5907	10.5551	49.8044	17.6905	4.18753	6.05814	9.06131	5.05531	3.04455	40.4472	13.1567	7.97097	11.7536	8.34464	0	0	1	1	0	0	0	0	0	1	0	0	0	0	3	0.214286	0.098067	0	0	2.94024	3.03831	5.87699	0.032277	0	0	0.967723	0.625112	354.7	358.7	358.8	358.3	4.87	27
ILMN_3152792	Pira11	Mus musculus paired-Ig-like receptor A11 (Pira11), mRNA.	10.5845	8.29284	44.375	39.6201	11.7421	5.0449	20.4224	10.363	5.46996	50.8685	11.5079	3.06639	6.69894	9.9533	0	0	1	1	0	0	1	0	0	1	0	0	0	0	4	0.285714	0.462088	0	0	3.19602	3.65811	6.73329	0.126319	0	0	0.873681	0.645114	361.7	365.7	365.8	365.2	5.21	27
ILMN_1249336	Mmp13	Mus musculus matrix metallopeptidase 13 (Mmp13), mRNA.	10.5835	16.0897	33.7877	19.7631	4.31619	15.9181	59.9065	5.60067	6.94695	33.4384	3.5671	6.39331	51.0958	19.6559	0	0	1	1	0	1	1	0	0	1	0	0	1	1	7	0.5	0.781487	0	0	2.74333	3.52482	6.39915	0.22171	0	0	0.77829	0.680059	349.5	353.5	353.7	353.1	6.28	27
ILMN_2593787	Kcnk13	Mus musculus potassium channel, subfamily K, member 13 (Kcnk13), mRNA.	10.5616	19.284	46.6838	9.20208	7.94617	4.9409	5.15731	6.13229	4.0359	31.4139	17.2578	1.53211	5.33689	12.919	0	0	1	0	0	0	0	0	0	1	1	0	0	0	3	0.214286	0	0	0.118816	3.02919	3.14801	5.52467	0	0	0.037743	0.962257	0.603751	360.1	364.1	364.2	363.7	4.15	27
ILMN_2696711	Mmp11	Mus musculus matrix metallopeptidase 11 (Mmp11), mRNA.	10.5334	7.83301	10.3061	18.9111	8.31837	11.6999	7.87817	32.8063	4.67375	8.60455	5.23567	8.72003	4.75298	10.5057	0	0	0	1	0	0	0	1	0	0	0	0	0	0	2	0.142857	0	0	0	2.74986	2.74985	5.24263	0	0	0	1	0.606612	349.2	351.2	351.2	351	4.63	27
ILMN_2939681	Lyzs	Mus musculus lysozyme (Lyzs), mRNA.	10.473	5.76825	36.7641	9.1446	7.72471	5.08783	8.5768	10.2244	2.82786	24.3841	7.27388	4.79474	4.78494	8.47189	1	0	1	1	1	0	1	1	0	1	0	0	0	0	7	0.5	0.050551	0	0	2.12129	2.17184	4.45087	0.023275	0	0	0.976725	0.642781	328.2	332.2	332.4	331.8	5.31	27
ILMN_1232202	Cp	Mus musculus ceruloplasmin (Cp), transcript variant 1, mRNA.	10.4626	9.83869	11.1725	4.11468	3.74743	3.89446	11.3117	3.21134	11.1004	27.4722	4.21746	-1.133	6.80298	10.9233	1	0	1	0	0	0	1	0	1	1	0	0	0	1	6	0.428571	0	0	0	1.91615	1.91615	3.78505	0	0	0	1	0.620318	319.9	321.9	322	321.7	4.9	27
ILMN_1233116	Map4k4	Mus musculus mitogen-activated protein kinase kinase kinase kinase 4 (Map4k4), mRNA.	10.4583	2.69858	10.1099	4.62022	4.39725	4.43451	5.88156	4.51789	2.35032	15.0463	4.30086	3.54254	3.02681	15.5505	1	0	1	0	0	0	0	0	0	1	0	0	0	1	4	0.285714	0	0	0	1.97971	1.97971	3.36219	0	0	0	1	0.558387	322.6	324.6	324.6	324.4	3.79	27
ILMN_3102376	Fcgr2b	Mus musculus Fc receptor, IgG, low affinity IIb (Fcgr2b), transcript variant 1, mRNA.	10.4413	12.4744	24.6216	21.5776	7.48987	9.35686	15.1743	6.71622	6.12587	23.0432	17.5969	4.15601	12.0267	9.29996	0	0	1	1	0	0	1	0	0	1	1	0	0	0	5	0.357143	0.129332	0	0	2.46402	2.59335	5.4471	0.04987	0	0	0.95013	0.661191	340.4	344.4	344.6	344	5.76	27
ILMN_1223317	Lgals3	Mus musculus lectin, galactose binding, soluble 3 (Lgals3), mRNA.	10.419	16.5845	46.1993	26.3809	9.64218	11.3327	26.4692	22.6223	5.43928	42.6045	14.3432	3.80093	26.0787	18.2874	1	1	1	1	1	1	1	1	0	1	1	0	1	1	12	0.857143	0.800208	0	0	2.02547	2.82568	6.0374	0.283191	0	0	0.716809	0.749875	325.1	329.1	329.2	328.7	8.86	27
ILMN_1236133	Tpcn2	Mus musculus two pore segment channel 2 (Tpcn2), mRNA.	10.4113	38.9387	70.5965	11.2708	6.60739	12.3784	11.4373	3.84658	8.17535	35.6435	33.7362	1.62387	21.894	28.7037	0	1	1	1	0	0	1	0	0	1	1	0	0	1	7	0.5	0	0	0	3.02421	3.02421	6.67622	0	0	0	1	0.660263	356.9	358.9	358.9	358.7	5.83	27
ILMN_3114585	Cd44	Mus musculus CD44 antigen (Cd44), transcript variant 2, mRNA.	10.3978	15.574	40.4572	21.3813	8.59692	7.68409	18.5055	19.9622	5.92907	100.606	11.776	3.7737	15.8217	13.4654	0	1	1	1	1	0	1	1	0	1	1	0	1	1	10	0.714286	0.786108	0	0	2.33953	3.12564	6.06783	0.251503	0	0	0.748497	0.712397	336.7	340.7	340.8	340.3	7.22	27
ILMN_1220609	Ltb4r1	Mus musculus leukotriene B4 receptor 1 (Ltb4r1), mRNA.	10.3695	47.2017	80.1941	26.1656	12.2877	8.80883	33.5068	21.1227	6.28063	47.7281	16.1451	1.07102	50.912	9.19761	0	1	1	1	1	0	1	1	0	1	1	0	1	0	9	0.642857	0.239058	0	0	2.64768	2.88674	7.14325	0.082813	0	0	0.917187	0.722606	346.3	350.3	350.5	349.9	7.72	27
ILMN_2649392	Fermt3	Mus musculus fermitin family homolog 3 (Drosophila) (Fermt3), mRNA.	10.3648	45.6592	34.603	18.3255	5.64049	3.34383	16.7538	11.4223	2.94869	41.3295	15.6306	5.23988	4.821	10.531	0	1	1	1	0	0	1	0	0	1	1	0	0	0	6	0.428571	0	0	0	3.08908	3.08908	6.12845	0	0	0	1	0.621958	358.6	360.6	360.7	360.4	4.94	27
ILMN_2618176	Socs3	Mus musculus suppressor of cytokine signaling 3 (Socs3), mRNA.	10.3011	12.025	39.6123	5.61233	3.82903	1.67229	14.0286	4.23108	2.50892	38.4897	3.27484	1.98811	15.3937	5.17171	1	1	1	0	0	0	1	0	0	1	0	0	1	0	6	0.428571	0	0	0	1.73412	1.73412	3.97754	0	0	0	1	0.673017	311.8	313.8	313.9	313.6	6.17	27
ILMN_1243451	Hvcn1	Mus musculus hydrogen voltage-gated channel 1 (Hvcn1), transcript variant 1, mRNA.	10.2767	16.7966	85.5176	9.3567	4.29947	5.63142	9.32149	17.9719	7.54476	28.9528	16.771	4.78792	4.23726	8.32495	0	0	1	0	0	0	0	0	0	0	0	0	0	0	1	0.0714286	0	0	0	4.2425	4.2425	6.8513	0	0	0	1	0.535581	384.3	386.3	386.4	386.1	3.46	27
ILMN_2714796	Coro1a	Mus musculus coronin, actin binding protein 1A (Coro1a), mRNA.	10.2726	11.5416	28.7831	6.5375	3.15815	2.60318	7.81237	8.81387	2.9695	19.9189	9.51184	3.9194	5.94235	5.27605	1	0	1	0	0	0	0	0	0	1	0	0	0	0	3	0.214286	0	0	0	2.23157	2.23157	4.15104	0	0	0	1	0.596804	332.3	334.3	334.3	334.1	4.44	27
ILMN_2757986	Sgsh	Mus musculus N-sulfoglucosamine sulfohydrolase (sulfamidase) (Sgsh), mRNA.	10.2369	5.74696	5.05926	1.36224	-1.03972	1.87963	2.47118	-1.25482	1.25525	1.03723	2.54766	1.06459	1.28845	2.63949	1	0	0	0	0	0	0	0	0	0	0	0	0	0	1	0.0714286	0	0	0	1.16853	1.16853	1.63349	0	0	0	1	0.46348	279.9	281.9	281.9	281.7	2.59	27
ILMN_2724785	Kcnab2	Mus musculus potassium voltage-gated channel, shaker-related subfamily, beta member 2 (Kcnab2), mRNA.	10.2227	37.5793	50.567	11.4732	10.1784	2.99945	12.1687	45.3986	6.24467	49.5793	23.0481	4.54606	8.00962	5.21307	0	1	1	0	0	0	0	1	0	1	1	0	0	0	5	0.357143	0	0	0	3.49768	3.49768	6.88032	0	0	0	1	0.61873	368.7	370.7	370.7	370.5	4.87	27
ILMN_2633179	LOC100047788	PREDICTED: Mus musculus similar to gamma-2a immunoglobulin heavy chain (LOC100047788), misc RNA.	10.2182	17.5119	63.1638	35.7482	1.72819	11.4939	2.23634	8.97011	107.48	46.2762	18.9054	8.54899	8.6141	33.1128	0	0	1	1	0	0	0	0	1	0	0	0	0	0	3	0.214286	0	0	1.73201	6.65015	8.38216	13.1507	0	0	0.20663	0.79337	0.68618	437.8	441.8	441.9	441.3	3.58	27
ILMN_1213978	Ptpro	Mus musculus protein tyrosine phosphatase, receptor type, O (Ptpro), mRNA.	10.2039	36.0885	35.716	27.8708	6.9732	10.1654	9.36449	12.1845	2.1381	21.118	17.3727	-1.21151	10.1291	6.63525	0	1	1	1	0	0	1	1	0	1	1	0	0	0	7	0.5	1.40861	0	0	2.47065	3.87926	5.79288	0.363114	0	0	0.636886	0.682383	341.4	345.4	345.5	344.9	5.98	27
ILMN_2632034	Dnahc11	Mus musculus dynein, axonemal, heavy chain 11 (Dnahc11), mRNA.	10.1653	8.32471	8.16612	5.6244	3.36564	1.46226	2.28567	4.31063	4.89139	12.9376	5.92473	1.62788	5.36893	4.93817	1	0	0	0	0	0	0	0	0	1	0	0	0	0	2	0.142857	0	0	0.557572	1.98278	2.54035	3.55602	0	0	0.219486	0.780514	0.657691	340.8	344.8	345	344.4	3.15	27
ILMN_1226525	H2-Ab1	Mus musculus histocompatibility 2, class II antigen A, beta 1 (H2-Ab1), mRNA.	10.1566	10.0815	25.9817	4.98115	3.56534	2.50937	6.69229	9.65315	3.63222	12.2315	8.98457	1.78588	4.80577	8.04518	1	0	1	0	0	0	0	1	0	0	0	0	0	0	3	0.214286	1.24358	0	0	2.04112	3.28471	3.79931	0.378598	0	0	0.621402	0.599997	325.9	329.9	330.1	329.5	4.28	27
ILMN_2849449	Itga5	Mus musculus integrin alpha 5 (fibronectin receptor alpha) (Itga5), mRNA.	10.1234	32.6482	8.37593	25.699	5.53491	5.47971	10.1251	7.46892	5.00231	12.7937	6.8412	1.39289	7.84116	5.99742	1	1	1	1	0	0	1	0	0	1	0	0	0	0	6	0.428571	0.369358	0	0	1.80412	2.17347	4.23554	0.169939	0	0	0.830061	0.681815	315.4	319.4	319.6	319	6.23	27
ILMN_1226990	D130017D19Rik		10.1178	5.18496	4.57287	1.94628	4.14295	1.53791	3.69266	2.27328	2.29681	4.93289	3.65127	1.65196	2.6813	2.26686	1	0	0	0	0	0	0	0	0	0	0	0	0	0	1	0.0714286	0	0	0.068189	1.80863	1.87682	2.57781	0	0	0.036332	0.963668	0.49226	318.2	322.2	322.4	321.8	2.53	27
ILMN_1246733	Gm22	PREDICTED: Mus musculus gene model 22, (NCBI) (Gm22), mRNA.	10.1108	38.7538	16.7902	20.0632	8.60336	13.2769	10.8255	24.7396	5.6301	45.7109	24.7834	1.98667	14.6656	10.692	0	1	1	1	0	0	0	1	0	1	1	0	0	0	6	0.428571	0	0	0	3.13901	3.139	6.54618	0	0	0	1	0.640362	359.9	361.9	362	361.7	5.34	27
ILMN_1239863	E330016A19Rik	Mus musculus RIKEN cDNA E330016A19 gene (E330016A19Rik), mRNA.	10.108	18.3097	22.9791	9.27843	7.43988	2.86171	9.85749	9.68616	3.03082	45.9874	12.7398	2.50817	13.3152	10.4047	0	1	1	1	0	0	1	0	0	1	1	0	0	0	6	0.428571	0	0	0	2.59947	2.59947	5.24275	0	0	0	1	0.628133	344.6	346.6	346.7	346.4	5.07	27
ILMN_3113420	Ptpn6	Mus musculus protein tyrosine phosphatase, non-receptor type 6 (Ptpn6), transcript variant 1, mRNA.	10.0081	13.8624	36.6864	11.0135	3.66761	2.88906	7.39843	6.72053	4.57599	31.0718	8.39104	4.53447	10.4933	10.0979	0	0	1	0	0	0	0	0	0	1	0	0	0	0	2	0.142857	0	0	1.06e-17	3.0651	3.0651	5.26888	0	0	3.47e-18	1	0.563698	358	360	360	359.8	3.88	27
ILMN_2967750	2600011E07Rik	Mus musculus RIKEN cDNA 2600011E07 gene (2600011E07Rik), mRNA.	9.88284	18.3262	12.8578	3.46343	1.25178	1.11721	13.6488	2.2906	1.93589	3.93401	6.13229	1.96253	6.1353	3.27269	1	1	1	0	0	0	1	0	0	0	0	0	0	0	4	0.285714	0	0	0	1.67135	1.67135	3.04601	0	0	0	1	0.588475	308.9	310.9	310.9	310.6	4.29	27
ILMN_2601833	Plcg2	Mus musculus phospholipase C, gamma 2 (Plcg2), mRNA.	9.86487	38.7225	29.2614	33.3992	6.48902	3.83712	12.3666	18.1651	4.11223	23.1697	11.1265	2.27963	8.59521	10.5346	0	1	1	1	0	0	1	1	0	1	0	0	0	0	6	0.428571	0	0	0	2.98174	2.98174	6.07428	0	0	0	1	0.631841	355.7	357.7	357.8	357.5	5.15	27
ILMN_2447483	A630036P20Rik		9.80029	3.92221	7.44411	3.11424	2.92971	1.80788	4.81048	-1.02199	1.78137	15.5176	10.026	2.41104	9.1542	4.40318	1	0	0	0	0	0	0	0	0	1	1	0	0	0	3	0.214286	0.170875	0	0.068955	1.92813	2.16796	3.17298	0.078818	0	0.031806	0.889375	0.560335	323.4	329.4	329.7	328.8	3.33	27
ILMN_2584685	E430021P16Rik		9.79265	15.7739	30.9523	9.90667	3.34308	1.84513	6.80059	17.7907	2.55786	36.177	10.2241	1.76168	4.1274	9.31173	0	0	1	0	0	0	0	0	0	0	0	0	0	0	1	0.0714286	0	0	0	4.09795	4.09795	6.10227	0	0	0	1	0.496341	381.5	383.5	383.6	383.3	2.96	27
ILMN_2727116	Sox4	Mus musculus SRY-box containing gene 4 (Sox4), mRNA.	9.7857	19.1721	8.40327	29.334	7.46499	5.90741	7.90026	8.64371	7.30936	15.1583	17.9132	3.79407	11.6296	6.8997	0	1	0	1	0	0	1	0	0	1	1	0	0	0	5	0.357143	0.186382	0	0	2.2403	2.42668	4.76329	0.076806	0	0	0.923194	0.647964	332.8	336.8	336.9	336.3	5.47	27
ILMN_2630459	Cxcr4		9.77045	6.02043	19.2939	12.3083	5.89619	5.71093	5.94419	4.94133	4.65386	6.56381	4.83939	2.81396	4.35881	5.11473	1	0	1	1	1	1	1	0	0	0	0	0	0	0	6	0.428571	1.0383	0.00071	0	1.20658	2.24559	3.01388	0.462372	0.000316	0	0.537311	0.704327	277.1	283.1	283.4	282.5	6.85	27
ILMN_2867901	Cdc20	Mus musculus cell division cycle 20 homolog (S. cerevisiae) (Cdc20), mRNA.	9.71928	14.5798	6.90863	10.2021	4.02838	2.28671	2.24716	5.49264	4.76338	5.90403	5.66883	1.05774	5.40739	4.13531	1	1	0	1	0	0	0	0	0	0	0	0	0	0	3	0.214286	0	0	0.014012	2.122	2.13602	3.42212	0	0	0.00656	0.99344	0.537968	328.7	332.7	332.9	332.3	3.42	27
ILMN_2997406	Arl4c	Mus musculus ADP-ribosylation factor-like 4C (Arl4c), mRNA.	9.7112	12.6605	17.7978	6.52836	4.32638	3.57211	16.0509	3.85906	6.04757	13.0129	8.85781	1.91797	4.3247	9.049	1	0	1	0	0	0	1	0	0	1	0	0	0	0	4	0.285714	0.461079	0	0	2.05874	2.51982	4.23985	0.182981	0	0	0.817019	0.637366	326.2	330.2	330.3	329.7	4.92	27
ILMN_1230287	4732429D16Rik	Mus musculus RIKEN cDNA 4732429D16 gene (4732429D16Rik), mRNA.	9.70363	15.2761	10.7853	2.09807	2.11395	1.69164	9.41604	2.95452	2.41974	4.38619	2.96324	2.11321	4.54779	2.16008	1	1	1	0	0	0	1	0	0	0	0	0	0	0	4	0.285714	0	0	0	1.34501	1.34501	2.74525	0	0	0	1	0.632545	291.3	293.3	293.3	293.1	5.16	27
ILMN_2631663	BC022687	Mus musculus cDNA sequence BC022687 (BC022687), mRNA.	9.70229	9.83506	31.4688	34.831	9.46721	10.7708	12.6549	7.77625	10.7896	23.3432	12.5921	3.72989	9.37206	15.147	0	0	1	1	1	0	1	0	1	1	1	0	0	1	8	0.571429	0	0	0	2.37529	2.37529	5.65747	0	0	0	1	0.685112	337.3	339.3	339.4	339.1	6.53	27
ILMN_2627217	Pi4k2b	Mus musculus phosphatidylinositol 4-kinase type 2 beta (Pi4k2b), transcript variant 2, mRNA.	9.70027	25.0378	24.8569	5.91402	5.70655	5.74238	15.1472	9.45761	5.35453	31.1048	7.23265	3.11892	21.3614	22.5127	1	1	1	0	0	0	1	0	0	1	0	0	1	1	7	0.5	0.440141	0	0	2.14214	2.58229	4.99514	0.170446	0	0	0.829554	0.679653	329.3	333.3	333.5	332.9	6.22	27
ILMN_3131478	Bcat1	Mus musculus branched chain aminotransferase 1, cytosolic (Bcat1), transcript variant 2, mRNA.	9.67878	23.3093	33.0179	24.6692	6.30135	4.56938	8.30143	2.37109	2.37268	14.9072	8.48771	2.67625	2.68353	11.9194	0	1	1	1	0	0	0	0	0	0	0	0	0	0	3	0.214286	0	0	0.37535	2.42961	2.80496	5.10026	0	0	0.133817	0.866183	0.685099	350.1	354.1	354.2	353.7	4.76	27
ILMN_2592486	Pglyrp1		9.65482	18.0463	10.2486	2.86616	5.57349	1.72901	9.47601	14.4035	1.34811	12.0453	3.43593	-1.03212	4.14757	4.60862	0	0	0	0	0	0	0	1	0	0	0	0	0	0	1	0.0714286	0.530215	0	0	2.79193	3.32215	4.40171	0.1596	0	0	0.8404	0.52609	350.8	354.8	354.9	354.4	3.12	27
ILMN_2429552	Frmd4a		9.6493	6.43913	4.13002	2.11228	5.66227	1.1123	2.06197	1.33726	3.94261	3.81901	6.31004	2.4995	3.02206	1.60384	1	0	0	0	0	0	0	0	0	0	0	0	0	0	1	0.0714286	0.161188	0	0	1.66648	1.82767	2.43013	0.088193	0	0	0.911807	0.486852	308.8	312.8	313	312.4	2.62	27
ILMN_1230708	Clec4a1	Mus musculus C-type lectin domain family 4, member a1 (Clec4a1), mRNA.	9.61792	19.3527	63.8372	92.4204	15.3372	16.7937	26.4237	22.7635	4.74244	107.826	42.4907	11.9933	18.0651	23.4808	0	0	1	1	0	0	1	0	0	1	1	0	0	0	5	0.357143	1.74605	0	0	4.56551	6.31156	9.66717	0.276643	0	0	0.723357	0.64786	390.9	394.9	395	394.5	5.33	27
ILMN_3143483	Lat2	Mus musculus linker for activation of T cells family, member 2 (Lat2), transcript variant 2, mRNA.	9.58132	13.5295	54.7135	14.359	7.70663	6.94921	15.5207	27.7896	6.84184	35.4595	19.8453	2.46799	13.3333	12.7885	0	0	1	1	0	0	1	1	0	1	1	0	0	0	6	0.428571	1.25457	0	0	2.42048	3.67505	6.11462	0.341375	0	0	0.658625	0.705119	339.6	343.6	343.8	343.2	6.95	27
ILMN_3008858	Ctsc	Mus musculus cathepsin C (Ctsc), mRNA.	9.54222	11.3569	15.0222	17.9573	6.16491	2.9822	5.44382	8.32139	2.57902	24.2005	17.2928	1.10465	5.97249	7.79912	1	1	1	1	0	0	0	1	0	1	1	0	0	0	7	0.5	0	0	0.123879	1.85912	1.983	4.20464	0	0	0.062471	0.937529	0.687926	322.6	326.6	326.7	326.1	5.77	27
ILMN_1259252	Anxa1	Mus musculus annexin A1 (Anxa1), mRNA.	9.53379	6.23418	22.6153	14.9546	4.33755	5.29535	10.9448	4.65095	1.77111	23.6451	5.54928	-1.18937	2.5095	5.48688	0	0	1	1	0	0	1	0	0	1	0	0	0	0	4	0.285714	0.506279	0.068978	0	2.24016	2.81542	4.13394	0.179824	0.0245	0	0.795676	0.602931	334.9	340.9	341.2	340.3	4.2	27
ILMN_1231689	Sfrp1	Mus musculus secreted frizzled-related protein 1 (Sfrp1), mRNA.	9.52009	4.89271	13.5301	13.2881	2.10722	3.69148	2.74164	6.69832	4.47374	6.98068	8.62739	3.29075	1.89177	4.84314	0	0	1	1	0	0	0	0	0	0	0	0	0	0	2	0.142857	0	0	0	2.68839	2.68839	3.90308	0	0	0	1	0.48341	347.4	349.4	349.4	349.1	2.81	27
ILMN_3091003	Ms4a7	Mus musculus membrane-spanning 4-domains, subfamily A, member 7 (Ms4a7), transcript variant 1, mRNA.	9.48732	11.8225	189.28	39.7494	9.16122	9.55231	18.6525	43.1361	5.33691	113.473	15.7137	3.76478	22.3412	12.1236	0	0	1	1	0	0	0	1	0	1	0	0	0	0	4	0.285714	0	0	0	4.50099	4.50099	9.22748	0	0	0	1	0.634164	389.1	391.1	391.2	390.9	5.2	27
ILMN_2851576	Tnfsf14	Mus musculus tumor necrosis factor (ligand) superfamily, member 14 (Tnfsf14), mRNA.	9.46613	29.7751	25.7987	19.4357	3.68335	3.0143	17.9039	4.10356	4.38602	10.7941	4.41251	1.55666	11.0446	4.80546	1	1	1	1	0	0	1	0	0	1	0	0	1	0	7	0.5	0.406683	0	0.011757	1.29196	1.7104	3.67908	0.237771	0	0.006874	0.755355	0.740323	289.3	295.3	295.6	294.7	8.19	27
ILMN_1229523	Fcgr1	Mus musculus Fc receptor, IgG, high affinity I (Fcgr1), mRNA.	9.46564	21.0439	38.2516	36.3006	6.93339	6.19466	30.8569	10.5403	2.74751	28.6885	18.7089	4.54689	10.8528	20.4859	0	1	1	1	0	0	1	0	0	1	1	0	0	1	7	0.5	0.752369	0	0	2.84377	3.59614	6.59455	0.209216	0	0	0.790784	0.678103	352.4	356.4	356.5	356	6.17	27
ILMN_2665307	Pilra	Mus musculus paired immunoglobin-like type 2 receptor alpha (Pilra), mRNA.	9.46498	8.77501	15.556	34.5454	1.27789	8.25275	9.54616	2.90195	3.55541	19.8509	9.71592	2.83562	13.4121	5.1709	1	0	1	1	0	1	1	0	0	1	1	0	1	0	8	0.571429	0	0	0	1.80011	1.80011	4.13943	0	0	0	1	0.673848	314.9	316.9	316.9	316.7	6.2	27
ILMN_2988931	Stfa1	Mus musculus stefin A1 (Stfa1), mRNA.	9.46187	6.35577	10.3947	1.31409	1.01024	1.35693	21.3136	1.73706	1.72828	1.04444	2.30362	1.79048	8.92901	3.57735	1	0	1	0	0	0	1	0	0	0	0	0	0	0	3	0.214286	0	0.019249	0.136143	1.79918	1.95457	3.33079	0	0.009848	0.069654	0.920498	0.624334	321.2	327.2	327.5	326.6	3.96	27
ILMN_2689785	Cd68	Mus musculus CD68 antigen (Cd68), mRNA.	9.41101	30.005	85.9038	30.0123	22.2147	8.97648	19.8513	36.886	3.94531	114.521	22.6023	5.71406	12.4715	12.7079	0	0	1	1	1	0	1	1	0	1	1	0	0	0	7	0.5	0	0	0	3.80025	3.80025	8.66564	0	0	0	1	0.671093	375.4	377.4	377.4	377.2	6.12	27
ILMN_2685023	Hmha1	Mus musculus histocompatibility (minor) HA-1 (Hmha1), mRNA.	9.36173	9.2217	14.8645	4.83582	1.61734	1.68223	8.96821	22.9202	3.53262	18.507	15.4325	2.90048	3.11695	7.19041	0	0	1	0	0	0	0	1	0	0	1	0	0	0	3	0.214286	2.65356	0	0	2.74726	5.40082	4.81207	0.491326	0	0	0.508674	0.57548	350.3	354.3	354.4	353.9	3.91	27
ILMN_2506039	A130090K04Rik		9.35767	7.21284	15.323	2.11254	1.63866	-1.08292	3.77684	3.65983	2.77603	9.59334	5.32488	1.36788	1.9164	2.29805	1	0	1	0	0	0	0	0	0	1	0	0	0	0	3	0.214286	0.961064	0	0.240646	1.52745	2.72916	2.81343	0.352146	0	0.088176	0.559678	0.643922	313.4	319.4	319.8	318.8	3.35	27
ILMN_1244272	Epb4.1l3	Mus musculus erythrocyte protein band 4.1-like 3 (Epb4.1l3), mRNA.	9.34908	14.8673	12.2042	7.47918	5.05083	5.18412	8.84658	7.10939	5.66716	21.9396	6.91438	3.13413	10.4478	8.78911	1	1	1	1	0	0	1	1	0	1	1	0	1	1	10	0.714286	0	0	0	1.5532	1.5532	3.67754	0	0	0	1	0.68324	302.9	304.9	305	304.7	6.47	27
ILMN_3003631	Ppap2c	Mus musculus phosphatidic acid phosphatase type 2c (Ppap2c), mRNA.	9.31997	5.67833	8.27466	15.3168	3.17505	1.55949	8.0666	6.95235	7.2509	15.6787	7.28018	1.73989	16.7811	3.26052	1	0	1	1	0	0	1	0	1	1	1	0	1	0	8	0.571429	0	0	0	1.63863	1.63863	3.55542	0	0	0	1	0.654338	307.3	309.3	309.3	309	5.68	27
ILMN_1214634	Aqp9	Mus musculus aquaporin 9 (Aqp9), mRNA.	9.30029	13.334	11.7481	5.20854	2.87954	1.50663	7.24075	1.34257	3.77209	7.344	3.87454	2.07156	3.00632	1.66948	1	1	1	0	0	0	1	0	0	0	0	0	0	0	4	0.285714	0	0	0	1.50207	1.50207	2.77987	0	0	0	1	0.594746	300.2	302.2	302.3	302	4.4	27
ILMN_2909150	Ctgf	Mus musculus connective tissue growth factor (Ctgf), mRNA.	9.29175	15.0971	10.7294	12.4959	5.0645	5.49131	13.4831	8.47008	7.62805	17.5423	4.50585	1.20529	7.21867	9.99074	1	1	1	1	1	0	1	1	1	1	0	0	0	1	10	0.714286	0.166267	0	0	1.32138	1.48765	3.75415	0.111765	0	0	0.888235	0.736756	290.1	294.1	294.2	293.7	8.1	27
ILMN_3059557	Naip5	Mus musculus NLR family, apoptosis inhibitory protein 5 (Naip5), mRNA.	9.28274	3.10423	26.2278	7.52369	6.37551	2.56988	2.44369	2.46421	7.41932	20.0422	9.25062	1.41734	5.56739	8.54363	0	0	1	0	0	0	0	0	0	1	0	0	0	0	2	0.142857	0.480032	0	0.152618	2.65819	3.29083	4.40473	0.145869	0	0.046377	0.807754	0.572138	351.2	357.2	357.5	356.5	3.32	27
ILMN_2564205	Pik3cg		9.28177	19.9991	28.1541	10.0522	4.75656	4.80571	6.17209	5.438	5.53564	33.5661	13.0579	1.60128	6.81541	9.11766	0	1	1	1	0	0	0	0	0	1	1	0	0	0	5	0.357143	1.35669	0	0.214281	2.54493	4.1159	5.03036	0.329622	0	0.052062	0.618316	0.65009	350	356	356.3	355.3	4.43	27
ILMN_1247832	Cd74	Mus musculus CD74 antigen (invariant polypeptide of major histocompatibility complex, class II antigen-associated) (Cd74), transcript variant 1, mRNA.	9.27855	39.7413	31.6965	20.5545	7.44287	2.51289	10.3657	22.9143	6.18503	28.842	10.9285	4.54576	4.44752	8.64406	0	1	1	1	0	0	0	1	0	1	0	0	0	0	5	0.357143	3.30858	0	0	3.27976	6.58834	6.25087	0.502188	0	0	0.497812	0.609894	364.7	368.7	368.8	368.3	4.52	27
ILMN_3009243	Dusp2	Mus musculus dual specificity phosphatase 2 (Dusp2), mRNA.	9.27502	8.88538	30.7966	6.26911	3.60685	1.56184	9.78302	2.98758	3.07402	20.3205	5.49921	2.68221	6.85315	2.75716	0	0	1	0	0	0	0	0	0	0	0	0	0	0	1	0.0714286	0	0	0.15832	2.86685	3.02517	4.54651	0	0	0.052334	0.947666	0.550644	356.8	360.8	361	360.4	3.12	27
ILMN_2913716	H2-Ab1	Mus musculus histocompatibility 2, class II antigen A, beta 1 (H2-Ab1), mRNA.	9.25671	9.81417	54.7847	7.40921	7.78847	2.07534	8.70135	19.1258	3.00146	26.5597	7.65645	1.85005	4.62333	7.61046	0	0	1	0	0	0	0	1	0	1	0	0	0	0	3	0.214286	1.20953	0	0	2.70784	3.91737	5.04933	0.30876	0	0	0.69124	0.600326	348.7	352.7	352.8	352.2	4.34	27
ILMN_1258357	Dok3	Mus musculus docking protein 3 (Dok3), mRNA.	9.22772	32.9422	89.617	8.82062	3.58929	3.85859	9.13687	16.0414	3.22728	26.0787	8.34189	2.25627	10.495	17.3457	0	1	1	0	0	0	0	1	0	1	0	0	0	1	5	0.357143	4.13248	0	0	2.73896	6.87143	6.09959	0.601399	0	0	0.398601	0.66646	350.4	354.4	354.5	354	5.71	27
ILMN_2692960	Ero1lb	Mus musculus ERO1-like beta (S. cerevisiae) (Ero1lb), mRNA.	9.18768	10.0026	4.78743	7.20371	3.01525	1.9314	7.84688	1.665	5.63221	7.95981	3.08758	4.58755	2.54683	4.78599	0	0	0	0	0	0	1	0	0	0	0	0	0	0	1	0.0714286	1.15324	0	0	2.08265	3.23589	3.19076	0.356391	0	0	0.643609	0.513875	327.5	331.5	331.7	331.1	2.81	27
ILMN_2768026	Gusb	Mus musculus glucuronidase, beta (Gusb), mRNA.	9.17097	9.20765	14.7485	6.82799	7.27708	5.53717	9.39804	7.87606	2.19667	29.5885	6.66371	6.14608	7.20218	5.4118	0	0	1	0	0	0	1	0	0	1	0	0	0	0	3	0.214286	0	0	0	2.19068	2.19068	4.48257	0	0	0	1	0.633467	330.8	332.8	332.8	332.6	5.18	27
ILMN_2534201	A430084P05Rik	Mus musculus RIKEN cDNA A430084P05 gene (A430084P05Rik), mRNA.	9.15986	37.5342	33.8445	6.44634	2.91121	1.66281	8.89133	3.46703	7.7486	13.4917	14.5253	2.0509	17.4268	6.90484	0	1	1	0	0	0	0	0	0	0	1	0	0	0	3	0.214286	0.169737	0	0	2.96353	3.13326	5.21276	0.054173	0	0	0.945827	0.574235	355.4	359.4	359.5	359	3.93	27
ILMN_2787257	Coro1a	Mus musculus coronin, actin binding protein 1A (Coro1a), mRNA.	9.15097	14.7905	37.6114	10.5504	4.53474	2.87607	11.3327	8.83114	3.89098	23.793	12.9116	4.83962	6.86725	5.70915	0	0	1	0	0	0	1	0	0	1	0	0	0	0	3	0.214286	0.468428	0	0	2.98237	3.45079	5.17591	0.135745	0	0	0.864255	0.569281	356.1	360.1	360.2	359.7	3.87	27
ILMN_1218181	Ifitm6	Mus musculus interferon induced transmembrane protein 6 (Ifitm6), mRNA.	9.10731	10.8493	27.965	6.47311	3.6083	1.03516	7.95642	3.45881	1.34135	8.67301	2.64721	2.2493	6.63885	8.23974	0	0	1	0	0	0	0	0	0	0	0	0	0	0	1	0.0714286	0	0.035783	0	2.31835	2.35413	4.03021	0	0.0152	0	0.9848	0.573635	336.4	340.4	340.6	340	3.92	27
ILMN_2826916	Ptpre	Mus musculus protein tyrosine phosphatase, receptor type, E (Ptpre), mRNA.	9.10715	12.9412	13.3665	18.2768	4.49874	6.22015	9.49824	7.84718	6.01456	36.7762	12.1182	2.11409	6.63977	5.48588	1	1	1	1	0	0	1	0	0	1	1	0	0	0	7	0.5	1.76385	0	0.082307	2.02771	3.87387	4.42921	0.45532	0	0.021247	0.523433	0.672134	328.7	334.7	335	334.1	5.55	27
ILMN_2774646	Myd88		9.09564	7.61442	41.897	20.7058	5.75949	3.02147	13.1075	4.69093	3.51616	18.7086	9.6311	-2.72242	8.4536	8.90043	0	0	1	1	0	0	1	0	0	1	0	0	0	0	4	0.285714	2.22063	0	0	2.2943	4.51493	4.66891	0.491841	0	0	0.508159	0.634603	335.7	339.7	339.9	339.3	4.92	27
ILMN_2677859	Insl6	Mus musculus insulin-like 6 (Insl6), mRNA.	9.06904	1.69107	11.4695	4.06394	3.95676	2.32906	8.97007	6.23353	2.53271	7.00734	9.08099	-2.48448	3.49849	2.71702	0	0	1	0	0	0	1	0	0	0	0	0	0	0	2	0.142857	0	0	0.243979	2.178	2.42198	3.5299	0	0	0.100735	0.899265	0.579749	338.5	342.5	342.7	342.1	3.04	27
ILMN_2775157	Arg1		9.00281	10.7468	23.8543	7.84177	1.32225	1.80341	14.2732	3.29328	1.52462	15.7757	4.20054	2.47684	21.7966	8.39182	0	0	1	0	0	0	1	0	0	0	0	0	1	0	3	0.214286	1.09948	0	0	2.4842	3.58368	4.40578	0.306801	0	0	0.693199	0.579764	341.7	345.7	345.8	345.3	3.93	27
ILMN_2991255	Gpr84	Mus musculus G protein-coupled receptor 84 (Gpr84), mRNA.	8.99751	7.84533	7.8762	3.62796	1.12776	-1.01535	4.44031	1.09418	1.09216	4.07443	2.61648	1.90427	3.52201	1.1501	1	1	1	0	0	0	1	0	0	0	0	0	0	0	4	0.285714	0	0.018124	0.067591	0.910797	0.996511	1.93766	0	0.018187	0.067827	0.913986	0.674252	266.5	272.5	272.8	271.9	4.98	27
ILMN_1246770	Ybx3		8.97166	17.5935	13.5289	5.92864	3.03998	1.17617	6.93185	2.23779	2.42794	8.05527	3.66636	2.93325	6.34462	2.19316	1	1	1	1	0	0	1	0	0	1	0	0	0	0	6	0.428571	0	0	0	1.34128	1.34128	2.62454	0	0	0	1	0.616711	291	293	293.1	292.8	4.83	27
ILMN_1253813	Nckap1l	Mus musculus NCK associated protein 1 like (Nckap1l), mRNA.	8.97073	52.3373	81.5846	22.9096	5.45841	4.95325	20.4839	30.3174	6.01256	88.5713	36.3296	2.68926	13.6845	8.98193	0	1	1	1	0	0	1	1	0	1	1	0	0	0	7	0.5	1.20597	0	0	4.5322	5.73817	8.40383	0.210167	0	0	0.789833	0.597439	390.1	394.1	394.3	393.7	4.39	27
ILMN_2574165	Slc7a11		8.93799	4.20595	6.27298	2.06729	1.34395	-1.23399	4.26481	1.38204	2.08918	1.99903	3.0602	1.00234	5.96946	1.06372	1	0	1	0	0	0	1	0	0	0	0	0	0	0	3	0.214286	0	0	0	1.08503	1.08503	1.73968	0	0	0	1	0.532229	273.9	275.9	275.9	275.7	3.41	27
ILMN_2997494	Lox	Mus musculus lysyl oxidase (Lox), mRNA.	8.89904	17.9631	26.4886	29.6817	6.87167	8.28729	33.9726	12.3046	5.38386	42.1151	9.11678	3.95504	29.62	14.6058	0	1	1	1	0	0	1	1	0	1	0	0	1	1	8	0.571429	0.547354	0	0	2.19294	2.74029	6.01171	0.199743	0	0	0.800257	0.727659	331.3	335.3	335.5	334.9	7.71	27
ILMN_2759309	Rnase6	Mus musculus ribonuclease, RNase A family, 6 (Rnase6), mRNA.	8.89288	8.2348	17.5719	4.04825	4.04736	1.34817	3.54155	4.85325	2.71765	36.5095	11.0167	-1.71525	6.16927	4.7801	0	0	1	0	0	0	0	0	0	1	0	0	0	0	2	0.142857	5.58994	0	0.383209	3.10089	9.07404	4.79119	0.616037	0	0.042231	0.341732	0.566675	369.4	375.4	375.7	374.7	2.59	27
ILMN_2657844	Cdc2a	Mus musculus cell division cycle 2 homolog A (S. pombe) (Cdc2a), mRNA.	8.87594	10.1333	16.5407	24.0396	4.70776	7.826	4.35038	2.69643	2.60517	13.6204	6.17772	6.00057	3.91913	5.74922	1	0	1	1	0	0	0	0	0	1	0	0	0	0	4	0.285714	0	0	0	1.93134	1.93133	3.87584	0	0	0	1	0.626275	320.6	322.6	322.6	322.4	5.03	27
ILMN_1248811	Ctla2b	PREDICTED: Mus musculus cytotoxic T lymphocyte-associated protein 2 beta (Ctla2b), mRNA.	8.86441	1.69996	7.81732	4.53053	2.16787	3.06221	5.53622	2.25058	3.17483	6.99634	3.17295	2.33395	1.76149	3.36353	1	0	1	0	0	0	0	0	0	0	0	0	0	0	2	0.142857	0.177492	0	0	1.68071	1.85821	2.5511	0.095518	0	0	0.904482	0.507091	309.5	313.5	313.7	313.1	2.77	27
ILMN_1243565	Manba	Mus musculus mannosidase, beta A, lysosomal (Manba), mRNA.	8.85674	7.36729	13.5933	12.975	6.83916	3.6324	2.96432	2.64533	2.34578	14.0024	2.80369	2.13054	1.76068	4.09865	0	0	1	1	0	0	0	0	0	1	0	0	0	0	3	0.214286	0	0	0	2.13562	2.13562	3.23291	0	0	0	1	0.504558	328.7	330.7	330.8	330.5	3.06	27
ILMN_1224211	Epb4.1l2		8.83191	16.3959	9.04393	5.18678	4.03028	1.46079	2.83679	3.5291	3.99256	8.47277	11.8419	3.99991	5.90226	5.99108	1	1	1	0	0	0	0	0	0	0	1	0	0	0	4	0.285714	0	0	0	1.73881	1.73881	3.49501	0	0	0	1	0.626867	312.1	314.1	314.1	313.9	5.04	27
ILMN_2645333	H60a	Mus musculus histocompatibility 60a (H60a), mRNA.	8.8316	17.1353	19.683	15.8917	6.58042	1.63521	8.06324	4.33258	3.97624	14.8213	4.7905	2.57779	5.93892	6.1151	1	1	1	1	1	0	1	0	0	1	0	0	0	0	7	0.5	0	0	0	1.63614	1.63614	3.71448	0	0	0	1	0.669643	307.1	309.1	309.2	308.9	6.08	27
ILMN_2744683	Sirpa	Mus musculus signal-regulatory protein alpha (Sirpa), mRNA.	8.82609	5.64876	14.7243	4.64089	7.01868	7.17436	6.24439	4.29721	6.79816	13.7123	9.00515	3.87877	9.69047	2.69164	0	0	1	0	0	0	0	0	0	0	0	0	0	0	1	0.0714286	1.45889	0	0	2.36778	3.82667	4.03511	0.381242	0	0	0.618758	0.563112	338	342	342.1	341.5	3.72	27
ILMN_2954575	Arhgap30	Mus musculus Rho GTPase activating protein 30 (Arhgap30), mRNA.	8.80425	15.7269	51.807	6.00323	5.26459	3.5392	10.3212	9.9211	3.31562	27.6921	16.0375	4.61306	6.6787	5.43621	0	1	1	0	0	0	1	1	0	1	1	0	0	0	6	0.428571	1.09379	0	0.061748	2.14083	3.29637	4.74953	0.331817	0	0.018732	0.649451	0.673273	331.9	337.9	338.2	337.3	5.73	27
ILMN_2813221	Metrnl	Mus musculus meteorin, glial cell differentiation regulator-like (Metrnl), mRNA.	8.79708	24.3362	10.9047	9.01133	7.05624	4.36218	11.9739	3.33613	4.40412	24.8327	8.78489	6.1534	2.83641	4.7201	0	1	1	1	0	0	1	0	0	1	0	0	0	0	5	0.357143	0	0	0	2.13207	2.13207	4.21776	0	0	0	1	0.620877	328.6	330.6	330.6	330.4	4.91	27
ILMN_1255869	Catnb		8.79693	31.5281	14.8532	11.2916	7.51545	3.73627	5.31533	3.73925	2.80297	12.5681	14.1193	2.26407	19.6692	8.26921	0	1	1	1	0	0	0	0	0	0	1	0	1	0	5	0.357143	0	0	0	2.68932	2.68932	4.91044	0	0	0	1	0.589244	347.4	349.4	349.4	349.2	4.3	27
ILMN_2650739	Arhgap9	Mus musculus Rho GTPase activating protein 9 (Arhgap9), mRNA. XM_986639 XM_986675 XM_986715	8.79114	10.4216	37.994	13.5046	5.52862	3.89899	10.704	9.32724	3.41249	19.8248	8.5281	3.23585	5.76878	6.36366	0	0	1	1	0	0	0	0	0	0	0	0	0	0	2	0.142857	0	0	0.142251	3.1389	3.28115	5.3925	0	0	0.043354	0.956646	0.581604	363.4	367.4	367.6	367	3.69	27
ILMN_2685392	Ccr5	Mus musculus chemokine (C-C motif) receptor 5 (Ccr5), mRNA.	8.7451	8.5976	33.9626	38.7864	5.51469	9.99322	26.8215	4.27515	1.3311	14.7373	4.67171	6.07645	4.49203	2.70139	1	0	1	1	0	1	1	0	0	1	0	0	0	0	6	0.428571	1.50747	0	0	1.96944	3.47692	4.77045	0.433566	0	0	0.566434	0.692819	323.2	327.2	327.3	326.8	6.27	27
ILMN_2867147	Tyrobp	Mus musculus TYRO protein tyrosine kinase binding protein (Tyrobp), mRNA.	8.71167	7.77836	91.2498	14.8301	21.5338	6.30993	19.6716	63.371	1.95166	29.6775	13.6058	1.22279	11.9469	23.364	1	0	1	1	1	0	1	1	0	1	1	0	1	1	10	0.714286	1.90474	0	0.79487	1.61494	4.31455	6.93704	0.441468	0	0.18423	0.374301	0.870516	331.1	337.1	337.4	336.4	11.24	27
ILMN_1254655	Casp4	Mus musculus caspase 4, apoptosis-related cysteine peptidase (Casp4), mRNA.	8.71092	4.18096	21.4562	5.13342	5.31725	3.57855	7.04754	3.3591	2.47432	12.3297	5.40689	1.75503	2.72704	5.15939	1	0	1	1	1	0	1	0	0	1	0	0	0	0	6	0.428571	3.10774	0	0	1.23335	4.34109	2.87214	0.715889	0	0	0.284111	0.681335	286.2	290.2	290.3	289.8	5.87	27
ILMN_1253572	6720422M22Rik		8.70277	6.9456	2.27868	-1.1826	2.54485	4.94827	2.9361	5.08774	2.32804	4.67317	4.04503	1.18451	3.48486	3.42056	1	0	0	0	0	0	0	0	0	0	0	0	0	0	1	0.0714286	1.20128	0	0	1.87631	3.07759	2.58525	0.39033	0	0	0.60967	0.459694	319.1	323.1	323.3	322.7	2.31	27
ILMN_1238215	Ctgf		8.69011	11.0115	9.54933	14.3317	6.06606	5.71509	12.9036	6.15272	6.62089	12.9639	3.83839	1.12868	7.818	9.79271	1	1	1	1	1	1	1	1	1	1	0	0	1	1	12	0.857143	0.578716	0	0	1.26004	1.83876	3.41552	0.314732	0	0	0.685268	0.725081	286.7	290.7	290.9	290.3	7.67	27
ILMN_2598622	Slamf8		8.65255	7.14747	33.3023	7.0582	8.00111	2.74451	8.07678	6.4049	6.41645	17.8737	17.0149	-1.40623	6.54201	12.2986	0	0	1	0	0	0	0	0	0	1	1	0	0	0	3	0.214286	0	0	0	2.32038	2.32038	4.62674	0	0	0	1	0.623864	335.4	337.4	337.5	337.2	4.98	27
ILMN_1259168	6330407A03Rik		8.60738	8.76913	8.99376	2.27767	3.07878	-1.71817	3.88006	2.45377	3.02755	6.76067	9.64262	2.00764	4.23139	2.19826	1	0	1	0	0	0	0	0	0	0	1	0	0	0	3	0.214286	0.012911	0	0.023015	1.63017	1.6661	2.62981	0.007749	0	0.013814	0.978437	0.541574	308	314	314.3	313.4	3.38	27
ILMN_1257631	Apobec1	Mus musculus apolipoprotein B mRNA editing enzyme, catalytic polypeptide 1 (Apobec1), transcript variant 1, mRNA.	8.58549	21.1029	60.9868	68.1773	6.19266	15.31	17.8041	22.0308	4.25613	61.8556	47.4143	6.48568	14.9921	9.55128	0	0	1	1	0	1	1	1	0	1	1	0	0	0	7	0.5	0	0	0.086062	3.11064	3.1967	7.46778	0	0	0.026922	0.973078	0.695792	361.4	365.4	365.5	364.9	6.49	27
ILMN_2970532	Mcm10	Mus musculus minichromosome maintenance deficient 10 (S. cerevisiae) (Mcm10), mRNA.	8.58549	3.11248	3.90325	11.5694	3.22344	1.51417	7.13711	2.94104	6.17289	11.8127	5.56102	2.74014	4.68668	2.58502	0	0	0	1	0	0	1	0	0	0	0	0	0	0	2	0.142857	0.153673	0	0	2.01214	2.16581	3.09896	0.070954	0	0	0.929046	0.513938	324.1	328.1	328.2	327.6	3.11	27
ILMN_2696829	Pcdh19	PREDICTED: Mus musculus protocadherin 19 (Pcdh19), mRNA.	8.5583	10.8305	4.92663	5.29291	3.94007	5.36508	3.88862	3.08175	3.36051	4.91299	9.19771	4.60477	3.21957	1.97325	1	1	0	0	0	0	0	0	0	0	1	0	0	0	3	0.214286	2.36119	0	0	1.74489	4.10608	2.9962	0.575048	0	0	0.424952	0.567321	313.8	317.8	317.9	317.4	3.63	27
ILMN_1246800	Serpina3n	Mus musculus serine (or cysteine) peptidase inhibitor, clade A, member 3N (Serpina3n), mRNA.	8.55089	20.7969	33.5357	5.64424	3.51484	2.90115	9.50562	8.57627	3.59359	31.8003	14.5304	2.14858	6.24254	7.39248	0	1	1	0	0	0	0	0	0	1	1	0	0	0	4	0.285714	0	0	0	2.87517	2.87517	5.06287	0	0	0	1	0.57408	352.8	354.8	354.8	354.6	4.04	27
ILMN_1248267	E030030I06Rik	PREDICTED: Mus musculus RIKEN cDNA E030030I06 gene, transcript variant 1 (E030030I06Rik), mRNA.	8.54541	4.66098	5.69482	6.99265	3.1526	2.12885	2.31466	7.40526	2.00635	2.66155	3.8031	-2.02265	1.00852	1.97853	1	0	1	1	0	0	0	1	0	0	0	0	0	0	4	0.285714	0	0	0.100136	1.2113	1.31143	2.13027	0	0	0.076356	0.923644	0.603879	289	293	293.1	292.6	3.7	27
ILMN_2929526	Cd37	Mus musculus CD37 antigen (Cd37), mRNA.	8.53964	20.6528	19.6513	15.151	3.0212	2.17815	9.35852	3.95486	2.08245	23.0874	9.17209	4.50266	3.03718	3.94605	0	0	1	1	0	0	0	0	0	0	0	0	0	0	2	0.142857	0	0	0.087222	3.31128	3.3985	4.95459	0	0	0.025665	0.974335	0.51131	366.3	370.3	370.5	369.9	2.89	27
ILMN_2524100	Zswim6		8.53638	10.4249	16.5973	14.2772	7.24618	2.66498	9.02959	10.2888	3.2948	51.374	6.62238	5.5831	4.85622	4.42162	1	0	1	1	1	0	1	1	0	1	0	0	0	0	7	0.5	0	0	0	1.86899	1.86899	4.11486	0	0	0	1	0.659347	317.9	319.9	320	319.7	5.81	27
ILMN_1228657	Fcgr2b	Mus musculus Fc receptor, IgG, low affinity IIb (Fcgr2b), transcript variant 2, mRNA.	8.5188	12.9188	52.7848	10.4193	34.1645	4.15601	21.1124	15.3421	3.09854	60.7818	14.3311	2.667	23.9259	7.68269	1	1	1	1	1	0	1	1	0	1	1	0	1	0	10	0.714286	2.15268	0	0.717378	1.66097	4.53102	6.0681	0.475097	0	0.158326	0.366577	0.844399	330.9	336.9	337.2	336.2	9.7	27
ILMN_3135107	Far1	Mus musculus fatty acyl CoA reductase 1 (Far1), transcript variant 2, mRNA.	8.51054	5.35802	7.60198	8.13657	3.00674	3.16784	5.23555	5.60766	1.96539	6.52389	3.5873	2.96276	4.86914	1.40395	1	0	1	1	0	0	1	1	0	0	0	0	0	0	5	0.357143	0	0	0.110621	1.11848	1.2291	2.40805	0	0	0.090002	0.909998	0.680503	283.6	287.6	287.8	287.2	5.17	27
ILMN_2847787	Emr1	Mus musculus EGF-like module containing, mucin-like, hormone receptor-like sequence 1 (Emr1), mRNA.	8.50936	6.37695	51.9193	20.3698	12.8214	15.6835	6.1539	14.1306	3.50086	29.8653	9.738	2.10402	3.60667	9.27593	0	0	1	1	0	0	0	0	0	0	0	0	0	0	2	0.142857	0	0	0	3.89464	3.89464	6.6172	0	0	0	1	0.558578	377.4	379.4	379.4	379.2	3.8	27
ILMN_2733733	Tlr2	Mus musculus toll-like receptor 2 (Tlr2), mRNA.	8.48977	29.7091	80.6121	30.392	15.0409	7.07939	15.5685	11.485	3.07015	21.3989	22.5425	4.2358	22.9104	10.2512	0	1	1	1	1	0	1	0	0	0	1	0	0	0	6	0.428571	0	0	0	3.20417	3.20417	6.94128	0	0	0	1	0.653792	361.6	363.6	363.6	363.4	5.67	27
ILMN_2612079	Rrbp1	Mus musculus ribosome binding protein 1 (Rrbp1), transcript variant 2, mRNA.	8.44765	14.8999	27.6345	21.0922	7.09479	4.83486	17.8182	8.87656	7.09727	37.1983	8.25304	4.46584	12.0818	5.74192	0	0	1	1	0	0	1	0	0	1	0	0	0	0	4	0.285714	0.314665	0	0	2.31616	2.63082	5.08672	0.119607	0	0	0.880393	0.659514	335.6	339.6	339.7	339.1	5.73	27
ILMN_2921303	Tyms-ps	Mus musculus thymidylate synthase, pseudogene (Tyms-ps), non-coding RNA.	8.44224	2.29655	18.4836	2.91101	4.78719	6.24878	12.2326	2.04146	1.89294	5.29183	4.23555	5.24578	3.31605	6.47726	0	0	1	0	0	0	1	0	0	0	0	0	0	0	2	0.142857	1.20404	0	0	2.1405	3.34455	3.59101	0.360001	0	0	0.639999	0.55608	329.7	333.7	333.9	333.3	3.39	27
ILMN_1240935	Sall2	Mus musculus sal-like 2 (Drosophila) (Sall2), mRNA.	8.42528	3.37347	3.11493	1.72771	2.35711	2.16509	4.20458	2.98085	3.78692	4.77599	1.98605	2.41175	3.7463	5.19434	1	0	0	0	0	0	0	0	0	0	0	0	0	0	1	0.0714286	0	0	0	1.67979	1.67979	2.16244	0	0	0	1	0.417397	309.3	311.3	311.3	311.1	2.15	27
ILMN_2429551	Frmd4a		8.41682	4.31472	3.72593	2.54016	4.47386	2.32314	3.09771	2.62006	2.21519	5.43432	2.16025	3.5066	3.13783	2.94268	1	0	0	0	0	0	0	0	0	0	0	0	0	0	1	0.0714286	0.587372	0.018214	0	1.55396	2.15954	2.23927	0.271989	0.008434	0	0.719577	0.4874	304.4	310.4	310.7	309.8	2.54	27
ILMN_1234487	Angpt2	Mus musculus angiopoietin 2 (Angpt2), mRNA.	8.41405	3.41701	5.00719	5.51026	4.11639	3.90304	3.24136	4.74473	3.81142	4.76046	2.74923	1.65168	1.98279	2.89723	1	0	1	1	1	1	1	1	1	1	0	0	0	0	9	0.642857	0	0	0	0.673467	0.673467	1.64591	0	0	0	1	0.693118	235.2	237.2	237.3	237	6.78	27
ILMN_2419078	5033413D16Rik		8.38218	20.8682	7.67212	4.48796	6.17526	2.04195	4.01845	2.9007	2.2112	6.41419	5.03015	1.10942	14.7618	4.79423	0	1	0	0	0	0	0	0	0	0	0	0	1	0	2	0.142857	2.28953	0	0	2.09367	4.3832	3.44562	0.522343	0	0	0.477657	0.54832	328.4	332.4	332.5	332	3.38	27
ILMN_1230302	Napsa	Mus musculus napsin A aspartic peptidase (Napsa), mRNA.	8.35955	28.319	29.6359	15.4706	5.7026	4.89896	16.8596	10.7372	6.25134	29.5087	8.5546	10.9201	12.5978	7.71001	0	0	1	1	0	0	1	0	0	0	0	0	0	0	3	0.214286	0	0	0	3.68619	3.68619	6.40833	0	0	0	1	0.568585	372.9	374.9	375	374.7	3.95	27
ILMN_2445166	Vdr	Mus musculus vitamin D receptor (Vdr), mRNA.	8.35187	10.2869	14.4493	2.72591	8.01821	2.58189	7.16278	2.93818	4.90386	8.05509	8.6132	1.94981	4.4118	2.93513	0	0	1	0	1	0	0	0	0	0	0	0	0	0	2	0.142857	2.50712	0	0.415471	2.26479	5.18738	3.96599	0.483311	0	0.080093	0.436597	0.632133	347.2	353.2	353.5	352.6	3.18	27
ILMN_1215862	Cxcl9	Mus musculus chemokine (C-X-C motif) ligand 9 (Cxcl9), mRNA.	8.33958	20.4114	24.3293	4.36693	8.49033	3.64508	18.0007	10.3075	5.67862	6.95411	18.3738	5.01925	3.97926	6.13215	0	0	1	0	0	0	1	0	0	0	1	0	0	0	3	0.214286	1.41794	0.060218	0	3.12486	4.60301	5.34251	0.308046	0.013082	0	0.678872	0.570096	361.6	367.6	367.9	366.9	3.66	27
ILMN_2646166	Ndrl		8.3224	6.78179	9.21542	8.35767	3.4011	4.25556	9.76338	4.57208	5.25005	8.67903	6.05877	2.14087	6.10306	5.59779	1	1	1	1	0	0	1	1	1	1	1	0	1	1	11	0.785714	0.12413	0	0	0.963883	1.08801	2.60356	0.114089	0	0	0.885911	0.723129	264.5	268.5	268.7	268.1	7.61	27
ILMN_2593143	Dock10		8.309	15.74	17.2518	9.1141	1.92447	3.51275	16.0872	9.54735	5.95695	24.7828	20.0781	1.27234	9.07145	10.4379	0	0	1	0	0	0	1	0	0	1	1	0	0	0	4	0.285714	0	0	0	2.96006	2.96006	5.4374	0	0	0	1	0.591708	355.2	357.2	357.2	356.9	4.35	27
ILMN_1243616	Cdkn3	PREDICTED: Mus musculus cyclin-dependent kinase inhibitor 3, transcript variant 5 (Cdkn3), mRNA.	8.30382	4.60968	17.0184	15.769	6.04868	5.55832	9.26814	7.44592	2.0929	11.1543	8.18992	2.56994	6.99278	10.0511	1	0	1	1	0	0	1	0	0	1	1	0	0	1	7	0.5	0.128552	0	0	1.70619	1.83474	3.75446	0.070065	0	0	0.929935	0.659796	310.7	314.7	314.8	314.3	5.74	27
ILMN_2696749	Rac3	Mus musculus RAS-related C3 botulinum substrate 3 (Rac3), mRNA.	8.2893	7.35487	5.3467	7.15266	2.92529	3.12845	6.28904	3.20811	2.34906	5.07298	3.02881	2.03456	1.99506	4.27866	1	1	1	1	0	0	1	0	0	0	0	0	0	0	5	0.357143	0	0	0	1.09049	1.09049	2.10419	0	0	0	1	0.611314	274.3	276.3	276.3	276.1	4.72	27
ILMN_1245129	Ifitm1	Mus musculus interferon induced transmembrane protein 1 (Ifitm1), mRNA.	8.27581	14.7734	11.9526	4.83106	1.45829	1.42855	6.26398	1.01849	1.35725	2.48532	1.8239	1.9833	4.69579	1.23036	1	1	1	0	0	0	1	0	0	0	0	0	0	0	4	0.285714	0	0	0	1.46333	1.46333	2.43614	0	0	0	1	0.549492	298.1	300.1	300.1	299.9	3.66	27
ILMN_2645493	Pvrl2	Mus musculus poliovirus receptor-related 2 (Pvrl2), mRNA.	8.22306	10.8138	10.4183	7.13533	5.56507	2.60982	5.32943	9.6493	2.37739	13.7679	7.91053	1.14895	5.86135	4.3129	0	0	1	0	0	0	0	1	0	1	0	0	0	0	3	0.214286	0	0	0	2.06884	2.06884	3.47298	0	0	0	1	0.553227	326.1	328.1	328.2	327.9	3.71	27
ILMN_1226904	2900011L18Rik		8.21807	12.2768	10.4001	2.39645	7.69414	1.37188	3.98959	1.60687	2.37081	7.04679	7.50551	2.79032	3.06474	1.46414	0	0	1	0	1	0	0	0	0	0	0	0	0	0	2	0.142857	0.023831	0	0	2.18309	2.20692	3.23582	0.010798	0	0	0.989202	0.494157	330.5	334.5	334.7	334.1	2.89	27
ILMN_1245609	Sgpl1	Mus musculus sphingosine phosphate lyase 1 (Sgpl1), mRNA.	8.20129	23.5611	19.4908	7.25633	4.40756	5.4462	14.0296	8.55371	6.60201	21.1854	10.0333	3.67759	10.116	6.8956	0	1	1	0	0	0	1	0	0	1	0	0	0	0	4	0.285714	0	0	0.00389	2.64304	2.64693	4.86809	0	0	0.00147	0.99853	0.593399	346.1	350.1	350.3	349.7	4.36	27
ILMN_2611000	Il1r2	Mus musculus interleukin 1 receptor, type II (Il1r2), mRNA.	8.19745	33.7559	52.4065	1.71554	5.31953	-1.05296	15.4408	6.92973	1.6452	22.1935	7.96473	-1.20263	30.1566	7.06621	0	1	1	0	0	0	1	0	0	1	0	0	1	0	5	0.357143	0	0	0.66008	2.33961	2.99968	5.78238	0	0	0.22005	0.77995	0.751727	354.3	358.3	358.4	357.9	5.5	27
ILMN_2813224	Metrnl	Mus musculus meteorin, glial cell differentiation regulator-like (Metrnl), mRNA.	8.18425	5.16058	7.69929	2.67756	2.29173	1.184	1.37667	1.71859	1.92718	14.0503	6.96899	1.20234	5.71109	2.43703	1	0	1	0	0	0	0	0	0	1	1	0	0	0	4	0.285714	0	0	0	1.51626	1.51626	2.39678	0	0	0	1	0.525532	301	303	303	302.8	3.32	27
ILMN_2749747	2410004L22Rik	Mus musculus RIKEN cDNA 2410004L22 gene (2410004L22Rik), mRNA.	8.17093	6.22641	7.70409	12.208	4.39956	3.53835	7.25814	2.95411	4.84058	7.05836	8.33135	-1.07239	4.83428	8.93902	0	0	0	1	0	0	1	0	0	0	0	0	0	0	2	0.142857	0	0	0	1.95317	1.95317	3.32779	0	0	0	1	0.559806	321.5	323.5	323.5	323.3	3.82	27
ILMN_2607675	LOC641240	PREDICTED: Mus musculus similar to MHC class II antigen beta chain (LOC641240), mRNA.	8.15763	11.7775	20.1827	5.11382	3.13038	2.23233	6.14955	10.6849	3.69576	12.9496	10.5159	1.84526	4.89192	6.63597	1	1	1	0	0	0	1	1	0	1	1	0	0	0	7	0.5	1.23667	0	0	1.61708	2.85375	3.39829	0.433349	0	0	0.566651	0.64594	307.2	311.2	311.4	310.8	5.26	27
ILMN_1229680	Flrt3	Mus musculus fibronectin leucine rich transmembrane protein 3 (Flrt3), mRNA.	8.13533	38.8444	34.4594	12.3245	8.94846	2.31859	13.4672	11.0529	6.73436	13.5285	8.71515	6.86059	27.9517	16.069	0	1	1	0	0	0	0	0	0	0	0	0	0	0	2	0.142857	0	0	0	3.62435	3.62435	6.36473	0	0	0	1	0.572918	371.6	373.6	373.6	373.3	4.02	27
ILMN_1240318	Slc7a7	Mus musculus solute carrier family 7 (cationic amino acid transporter, y+ system), member 7 (Slc7a7), mRNA.	8.13265	5.77986	13.8427	6.70325	3.75169	2.2226	3.89175	4.17775	6.53159	11.3433	3.28496	3.96571	5.73198	1.01875	1	0	1	1	0	0	0	0	0	1	0	0	0	0	4	0.285714	0.322042	0	0	1.82606	2.1481	3.27687	0.149919	0	0	0.850081	0.583561	316.4	320.4	320.5	320	3.89	27
ILMN_1249975	Ighg	PREDICTED: Mus musculus Immunoglobulin heavy chain (gamma polypeptide), transcript variant 1 (Ighg), mRNA.	8.11182	8.3511	11.5584	4.90054	1.95792	19.0877	1.54555	20.0305	73.0134	24.1006	12.0595	2.72667	10.146	14.6479	0	0	0	0	0	0	0	0	1	0	0	0	0	0	1	0.0714286	0	0	1.54619	6.28803	7.83423	10.4713	0	0	0.197364	0.802636	0.624403	432.4	436.4	436.6	436	2.56	27
ILMN_2877958	Cd80	Mus musculus CD80 antigen (Cd80), mRNA.	8.10521	6.57793	6.69194	3.74514	3.1966	1.33127	5.61358	1.09274	4.35736	3.47907	6.61447	1.98307	3.49599	1.42511	1	0	1	0	0	0	1	0	0	0	1	0	0	0	4	0.285714	0	0	0	1.27506	1.27506	2.23702	0	0	0	1	0.572514	286.9	288.9	289	288.7	4.02	27
ILMN_2915232	Cotl1	Mus musculus coactosin-like 1 (Dictyostelium) (Cotl1), mRNA.	8.059	12.1853	17.5713	7.9053	3.94838	3.24293	8.35303	9.70077	4.18366	18.7255	8.42324	2.20701	7.89442	6.46997	1	1	1	1	0	0	1	1	0	1	1	0	0	0	8	0.571429	0.728952	0	0	1.77017	2.49912	3.74364	0.291683	0	0	0.708317	0.64751	314.2	318.2	318.3	317.8	5.42	27
ILMN_2754285	Col5a3		8.05662	2.93657	7.59066	3.88949	2.6102	3.31245	3.39441	3.79566	3.14669	21.8092	12.972	3.32204	8.60753	6.83978	0	0	0	0	0	0	0	0	0	1	1	0	0	0	2	0.142857	1.87847	0	0	2.3078	4.18626	3.73871	0.448721	0	0	0.551279	0.540791	336.1	340.1	340.2	339.6	3.25	27
ILMN_3021272	Adar	Mus musculus adenosine deaminase, RNA-specific (Adar), transcript variant 1, mRNA.	8.03404	20.0997	13.3383	8.58561	3.56248	1.8081	2.74674	4.37869	3.10831	22.0851	10.4474	3.84089	5.49569	8.667	0	1	1	1	0	0	0	0	0	1	1	0	0	0	5	0.357143	0.808095	0	0	1.99253	2.80062	3.9092	0.288542	0	0	0.711458	0.620019	323.8	327.8	327.9	327.3	4.41	27
ILMN_2685393	Ccr5	Mus musculus chemokine (C-C motif) receptor 5 (Ccr5), mRNA.	8.0307	26.2546	50.031	50.0119	8.07085	9.16748	21.7027	3.33561	2.39093	20.02	7.564	3.39996	8.63762	1.61462	0	1	1	1	0	0	1	0	0	1	0	0	0	0	5	0.357143	0	0	0	2.49432	2.49432	5.72926	0	0	0	1	0.673476	341.3	343.3	343.3	343.1	6.19	27
ILMN_2852672	Tspan32	Mus musculus tetraspanin 32 (Tspan32), mRNA.	8.01249	4.80965	30.9191	3.67917	1.39571	1.36566	1.78849	7.81313	5.32176	35.5916	15.8312	1.42564	5.66994	5.51797	0	0	1	0	0	0	0	0	0	1	1	0	0	0	3	0.214286	0.393699	0	0.622335	2.84849	3.86452	5.13284	0.101875	0	0.161038	0.737087	0.648176	367	373	373.3	372.4	3.23	27
ILMN_1223735	Myh8	Mus musculus myosin, heavy polypeptide 8, skeletal muscle, perinatal (Myh8), mRNA.	8.00749	14.7482	5.6826	3.96896	2.66161	1.94295	-1.14152	2.55403	1.22331	-1.92039	-1.41556	-1.81756	1.00742	-1.23879	1	1	0	0	0	0	0	0	0	0	0	0	0	0	2	0.142857	0	0	0	1.53095	1.53095	2.66272	0	0	0	1	0.568781	301.7	303.7	303.8	303.5	3.96	27
ILMN_1217032	D230048P18Rik		7.99141	100.026	6.4346	7.63125	4.45684	2.15132	5.31784	2.82652	3.21546	23.6915	17.5375	23.2764	4.60159	3.70095	0	1	0	0	0	0	0	0	0	1	1	0	0	0	3	0.214286	2.00017	0	0.034529	2.86128	4.89598	5.58151	0.408533	0	0.007053	0.584414	0.62291	354.3	360.3	360.6	359.7	4	27
ILMN_1257623	Pik3ap1	Mus musculus phosphoinositide-3-kinase adaptor protein 1 (Pik3ap1), mRNA.	7.99058	79.4495	93.7616	50.6721	7.3401	9.97298	20.2005	12.2086	2.311	103.243	20.7563	5.57923	20.1401	12.0011	0	1	1	1	0	0	1	0	0	1	0	0	0	0	5	0.357143	0	0	0	4.51283	4.51283	8.99825	0	0	0	1	0.623857	389.3	391.3	391.4	391.1	4.98	27
ILMN_2455850	Gpr137b-ps	Mus musculus G protein-coupled receptor 137B, pseudogene (Gpr137b-ps), non-coding RNA.	7.96349	9.76419	19.0346	25.7929	9.58102	5.84539	11.7114	16.8258	5.73853	21.9016	9.46203	1.78677	11.5859	7.39795	0	0	1	1	1	0	1	1	0	1	1	0	0	0	7	0.5	0	0	0	2.06986	2.06986	4.77758	0	0	0	1	0.675066	326.2	328.2	328.2	328	6.23	27
ILMN_1260027	Arpc4		7.96169	2.35224	4.37308	3.97254	2.72301	1.59629	3.23346	1.57784	5.40134	6.07156	7.62665	1.35083	2.62085	1.97335	1	0	0	0	0	0	0	0	0	0	1	0	0	0	2	0.142857	0	0	0.171356	1.59943	1.77079	2.43168	0	0	0.096768	0.903232	0.550369	313.2	317.2	317.3	316.8	2.66	27
ILMN_2769521	Ptafr		7.92549	5.93768	8.81784	2.7075	2.30196	2.48643	5.14147	7.12135	1.5404	6.0717	5.44677	-1.66983	12.9798	4.69548	1	0	1	0	0	0	0	1	0	0	0	0	1	0	4	0.285714	0	0.022878	0.037497	1.48989	1.55027	2.68827	0	0.014757	0.024187	0.961055	0.598769	302.6	308.6	308.9	307.9	4.08	27
ILMN_3157568	Bcl2l11	Mus musculus BCL2-like 11 (apoptosis facilitator) (Bcl2l11), transcript variant 1, mRNA.	7.89971	13.7726	6.49228	15.5549	4.37438	2.49857	4.60066	4.6671	2.04299	7.92091	4.35486	3.19484	3.57787	4.25965	1	1	0	1	0	0	0	0	0	0	0	0	0	0	3	0.214286	0.679592	0	0	1.51612	2.19572	2.99505	0.309508	0	0	0.690492	0.622738	301.7	305.7	305.8	305.3	4.66	27
ILMN_2580825	D930038O18Rik		7.89547	4.29731	1.73273	2.48513	1.88123	2.10544	1.22848	1.85151	2.95333	6.21922	2.43568	2.1848	3.61367	1.00746	1	0	0	0	0	0	0	0	0	0	0	0	0	0	1	0.0714286	0	0	0	1.58848	1.58848	1.96153	0	0	0	1	0.392637	304.7	306.7	306.8	306.5	1.94	27
ILMN_2803399	Mcm6	Mus musculus minichromosome maintenance deficient 6 (MIS5 homolog, S. pombe) (S. cerevisiae) (Mcm6), mRNA.	7.86843	4.18966	5.13077	7.48136	7.73156	4.68874	4.2683	3.79579	1.55942	7.88075	5.80119	11.5756	1.39432	4.32915	0	0	0	1	1	0	0	0	0	0	0	0	0	0	2	0.142857	0	0	0	2.11107	2.11107	3.23774	0	0	0	1	0.510985	327.8	329.8	329.8	329.6	3.13	27
ILMN_2476139	Tuba6		7.86025	7.01593	15.5296	7.42556	4.6041	3.53344	11.3711	14.0737	3.60179	15.5582	6.51572	2.42379	7.31606	5.37547	1	0	1	1	0	0	1	1	0	1	0	0	0	0	6	0.428571	0	0	0	1.56945	1.56945	3.58384	0	0	0	1	0.671557	303.8	305.8	305.8	305.6	6.13	27
ILMN_1220034	Junb	Mus musculus Jun-B oncogene (Junb), mRNA.	7.8563	11.3677	10.8237	8.36416	2.91501	1.82147	9.50904	4.08716	3.05891	16.7377	5.37821	1.31639	6.76661	5.23461	1	1	1	1	0	0	1	0	0	1	1	0	1	0	8	0.571429	0	0	0	1.1155	1.1155	2.7205	0	0	0	1	0.692473	276.1	278.1	278.2	277.9	6.76	27
ILMN_2590975	Gpr153	Mus musculus G protein-coupled receptor 153 (Gpr153), mRNA.	7.84175	6.08307	7.82125	5.18729	4.43582	3.12082	5.84507	4.66103	3.30898	18.3101	7.09191	5.02577	6.85156	7.50773	0	0	0	0	0	0	0	0	0	1	0	0	0	0	1	0.0714286	0	0.054891	0.050704	2.15554	2.26113	3.68135	0	0.024276	0.022424	0.9533	0.577559	332.9	338.9	339.2	338.3	3.65	27
ILMN_2642239	Nfkb2		7.82871	5.02782	4.95832	2.74899	2.65156	2.4321	1.27815	1.41706	2.77868	5.24581	2.56454	1.94047	4.05621	2.44748	1	0	0	0	0	0	0	0	0	0	0	0	0	0	1	0.0714286	0	0	0.10048	1.27644	1.37692	1.96626	0	0	0.072975	0.927025	0.54633	293	297	297.1	296.5	2.83	27
ILMN_3149944	Cklf	Mus musculus chemokine-like factor (Cklf), transcript variant 4, mRNA.	7.81773	11.7933	24.0123	8.17886	9.23313	3.04824	14.5683	6.53155	4.10305	12.5577	5.19771	4.07816	2.7092	7.26112	0	0	1	1	1	0	1	0	0	0	0	0	0	0	4	0.285714	0	0	0	2.26707	2.26707	4.57041	0	0	0	1	0.627976	333.5	335.5	335.6	335.3	5.06	27
ILMN_2737390	Moxd1	Mus musculus monooxygenase, DBH-like 1 (Moxd1), mRNA.	7.80352	1.39297	2.11092	1.98242	-1.04838	-1.02552	-1.16792	1.26747	1.02001	-1.14412	-1.38235	-1.1104	1.32446	4.88661	1	0	0	0	0	0	0	0	0	0	0	0	0	1	2	0.142857	0	0	0.09303	0.509991	0.603022	1.09001	0	0	0.154274	0.845726	0.696264	225.3	229.3	229.5	228.9	4.27	27
ILMN_1258652	Rbbp2		7.76292	7.98098	2.52083	2.17052	3.97518	-1.90069	3.01764	2.29831	1.22758	4.65893	5.46956	1.44625	3.22761	2.95785	1	0	0	0	0	0	0	0	0	0	0	0	0	0	1	0.0714286	0	0	0.01102	1.55602	1.56704	2.28414	0	0	0.007032	0.992968	0.492646	303.6	307.6	307.8	307.2	2.84	27
ILMN_1250910	Rab43	Mus musculus RAB43, member RAS oncogene family (Rab43), transcript variant 1, mRNA.	7.74613	10.3317	19.7455	8.53635	5.7488	4.78228	12.4449	5.63982	2.17117	10.5123	5.18466	2.69615	4.66939	4.68262	0	0	1	1	0	0	1	0	0	0	0	0	0	0	3	0.214286	0	0	0	2.27594	2.27594	4.12851	0	0	0	1	0.586545	333.9	335.9	335.9	335.7	4.26	27
ILMN_1235493	Fxyd5	Mus musculus FXYD domain-containing ion transport regulator 5 (Fxyd5), mRNA.	7.72883	12.8391	23.7738	10.0678	5.49127	5.29214	16.6568	9.16144	3.84359	34.4182	9.31254	3.69023	16.0026	9.87998	1	1	1	1	1	0	1	1	0	1	1	0	1	1	11	0.785714	0.28803	0	0	1.384	1.67203	4.09702	0.172264	0	0	0.827736	0.747668	294	298	298.1	297.6	8.73	27
ILMN_1236298	Exoc3l	Mus musculus exocyst complex component 3-like (Exoc3l), mRNA.	7.71585	6.24543	6.38395	5.28389	5.33438	4.4693	5.76676	1.72973	3.46446	3.96082	12.4153	2.24731	3.75514	1.71569	0	0	0	0	0	0	0	0	0	0	1	0	0	0	1	0.0714286	0	0	0.227548	1.80486	2.03241	3.10775	0	0	0.11196	0.88804	0.608467	324.2	328.2	328.4	327.8	3.38	27
ILMN_1250149	Dnmt3l	Mus musculus DNA (cytosine-5-)-methyltransferase 3-like (Dnmt3l), transcript variant 2, mRNA.	7.71237	12.0375	27.659	16.438	10.0162	2.29274	22.6836	6.03028	6.76648	27.3822	6.45716	1.39692	5.04796	7.89533	0	0	1	1	1	0	1	0	0	1	0	0	0	0	5	0.357143	0	0	0	2.14564	2.14564	4.83736	0	0	0	1	0.667334	329.1	331.1	331.1	330.9	6.02	27
ILMN_1213020	EG433865	PREDICTED: Mus musculus predicted gene, EG433865 (EG433865), mRNA.	7.71064	1.80705	33.5328	7.75185	4.21461	6.17226	9.70293	2.27999	4.15598	18.3817	4.36362	2.78169	4.60723	13.0658	0	0	1	0	0	0	1	0	0	1	0	0	0	1	4	0.285714	0.151167	0	0	2.21676	2.36793	4.00484	0.063839	0	0	0.936161	0.585563	331.9	335.9	336	335.5	4.1	27
ILMN_2523794	A630001G21Rik		7.68329	5.47908	10.3268	6.03335	4.0573	2.26051	3.5109	3.55328	5.80284	15.6494	4.5516	2.93511	4.37626	1.29663	0	0	1	0	0	0	0	0	0	1	0	0	0	0	2	0.142857	0	0	0	2.0813	2.0813	3.40303	0	0	0	1	0.541298	326.6	328.6	328.7	328.4	3.54	27
ILMN_1232537	Arl4c	Mus musculus ADP-ribosylation factor-like 4C (Arl4c), mRNA.	7.66282	47.3579	46.7154	18.2166	7.31481	11.4021	16.9207	10.1623	5.647	57.3889	15.887	6.77865	6.24716	10.6254	0	1	1	1	0	0	1	0	0	1	0	0	0	0	5	0.357143	0.051543	0	0	3.91752	3.96907	7.2914	0.012986	0	0	0.987014	0.597188	377.9	381.9	382	381.5	4.43	27
ILMN_2967266	Fxyd5	Mus musculus FXYD domain-containing ion transport regulator 5 (Fxyd5), mRNA.	7.66215	15.0428	23.4697	15.8585	4.95333	5.86792	16.5645	10.3614	4.15728	30.4696	10.7333	2.77308	15.1229	9.40748	1	1	1	1	0	0	1	1	0	1	1	0	1	1	10	0.714286	1.37523	0	0	1.52369	2.89893	4.40598	0.474394	0	0	0.525606	0.742804	302.5	306.5	306.7	306.1	8.42	27
ILMN_1228165	Tbc1d9	Mus musculus TBC1 domain family, member 9 (Tbc1d9), mRNA.	7.60567	14.0718	10.8858	8.30408	7.11567	5.23223	13.9512	2.0369	5.70383	1.8391	3.1746	2.71778	12.7268	3.37107	1	1	1	1	1	0	1	0	0	0	0	0	1	0	7	0.5	1.20575	0	0	1.63829	2.84404	3.36351	0.423957	0	0	0.576043	0.637543	308.2	312.2	312.4	311.8	5.09	27
ILMN_2946520	Npy	Mus musculus neuropeptide Y (Npy), mRNA.	7.58461	18.4976	21.3217	12.8401	10.1728	5.21602	25.8197	14.1475	12.5511	14.1742	8.04309	3.49619	17.2804	13.6761	0	0	1	1	1	0	1	1	1	0	0	0	0	0	6	0.428571	0	0	0	2.69594	2.69594	5.71917	0	0	0	1	0.64646	347.6	349.6	349.6	349.4	5.49	27
ILMN_2603699	Birc5	Mus musculus baculoviral IAP repeat-containing 5 (Birc5), transcript variant 1, mRNA.	7.58041	8.34802	6.30983	30.323	3.28461	2.06637	10.5698	4.05717	1.06547	11.253	5.43187	1.54959	3.33103	1.10668	1	0	0	1	0	0	1	0	0	1	0	0	0	0	4	0.285714	0	0	0	1.64267	1.64267	3.28692	0	0	0	1	0.62518	307.5	309.5	309.5	309.2	5	27
ILMN_1247207	Adm	Mus musculus adrenomedullin (Adm), mRNA.	7.57371	3.99834	3.27059	6.43464	2.27048	3.19397	1.8035	3.08389	1.93883	5.37203	2.09918	1.31946	3.04822	8.49382	1	0	0	1	0	0	0	0	0	0	0	0	0	1	3	0.214286	0	0	0.013551	1.52411	1.53766	2.25354	0	0	0.008813	0.991187	0.497193	302.1	306.1	306.3	305.7	2.88	27
ILMN_1249559	5730494J16Rik		7.54698	15.1516	7.40115	8.4531	5.67681	4.49283	5.31084	3.52104	2.17595	8.32971	4.71653	5.354	7.7996	5.06235	1	1	0	1	0	0	0	0	0	0	0	0	0	0	3	0.214286	0	0	0	1.68754	1.68753	3.21787	0	0	0	1	0.60668	309.6	311.6	311.7	311.4	4.63	27
ILMN_2448591	A730017D01Rik		7.5445	6.96778	10.7038	16.3502	2.11612	3.87058	8.4116	11.8589	6.45436	36.5847	9.77773	1.59374	2.23504	6.10934	0	0	0	1	0	0	0	0	0	1	0	0	0	0	2	0.142857	0.089523	0	0	2.57537	2.6649	4.49423	0.033594	0	0	0.966406	0.570618	344	348	348.1	347.5	3.9	27
ILMN_2461098	Plxnb2	PREDICTED: Mus musculus plexin B2, transcript variant 13 (Plxnb2), mRNA.	7.5347	12.6045	9.92041	18.5206	4.99194	4.2239	10.4485	6.71506	4.87432	17.7638	7.38437	7.65534	12.1123	7.51731	0	1	1	1	0	0	1	0	0	1	0	0	1	0	6	0.428571	0	0	0	1.72804	1.72804	3.99771	0	0	0	1	0.675807	311.6	313.6	313.6	313.3	6.25	27
ILMN_2681241	Birc5		7.53379	8.34686	9.34212	19.9324	5.91575	3.92196	6.47563	3.72238	2.29835	7.71696	4.55981	3.27357	5.57408	1.63716	1	0	1	1	1	0	1	0	0	0	0	0	0	0	5	0.357143	0	0	0	1.60877	1.60877	3.3103	0	0	0	1	0.635508	305.8	307.8	307.8	307.6	5.23	27
ILMN_1229041	Pira2	Mus musculus paired-Ig-like receptor A2 (Pira2), mRNA.	7.53104	11.1874	49.2687	26.6086	8.52914	5.88523	7.34315	7.86434	4.76364	44.7257	13.3186	6.79512	14.4701	7.51097	0	0	1	1	1	0	0	0	0	1	1	0	1	0	6	0.428571	0	0	0	2.1974	2.1974	5.2802	0	0	0	1	0.687881	331	333	333.1	332.8	6.61	27
ILMN_2804487	Aif1	Mus musculus allograft inflammatory factor 1 (Aif1), mRNA.	7.52296	9.73963	29.0492	10.737	5.69983	4.39968	6.69879	18.6264	3.50936	36.0801	14.2639	4.10645	16.9228	8.12772	0	0	1	1	0	0	0	1	0	1	1	0	1	0	6	0.428571	0	0	0.12148	2.33016	2.45164	5.1163	0	0	0.04955	0.95045	0.674577	339.8	343.8	343.9	343.4	5.55	27
ILMN_2944824	Hp	Mus musculus haptoglobin (Hp), mRNA.	7.5111	7.36967	101.7	3.88367	4.64211	3.05077	15.6204	16.3521	6.02802	35.6666	13.9319	1.52351	15.0299	4.47408	0	0	1	0	0	0	1	1	0	1	0	0	0	0	4	0.285714	0	0	0	3.0014	3.0014	5.63719	0	0	0	1	0.600678	356.3	358.3	358.3	358.1	4.51	27
ILMN_1241909	Atl3	Mus musculus atlastin GTPase 3 (Atl3), mRNA.	7.50109	6.0132	10.598	9.0686	3.31728	2.79554	2.56582	5.73185	2.65947	13.5965	5.23431	3.34753	5.17886	3.42539	0	0	1	1	0	0	0	0	0	1	0	0	0	0	3	0.214286	0.674819	0	0	1.95346	2.62828	3.15743	0.256753	0	0	0.743247	0.538541	322.1	326.1	326.2	325.7	3.42	27
ILMN_1222269	1810011H11Rik	PREDICTED: Mus musculus RIKEN cDNA 1810011H11 gene, transcript variant 4 (1810011H11Rik), mRNA.	7.49745	4.11303	14.2013	13.2999	5.07877	7.30154	4.66294	3.9881	8.25747	16.8565	8.05076	2.76027	4.55916	11.7154	0	0	1	1	0	0	0	0	1	1	1	0	0	1	6	0.428571	0.435973	0	0	1.76191	2.19788	3.81418	0.198361	0	0	0.801639	0.655114	313.6	317.6	317.7	317.2	5.49	27
ILMN_2445165	Vdr	Mus musculus vitamin D receptor (Vdr), mRNA.	7.47708	8.92695	6.02944	1.86775	1.65384	2.38576	4.1083	4.51946	6.30604	10.7002	4.08731	1.66284	4.50991	3.56652	0	0	0	0	0	0	0	0	0	1	0	0	0	0	1	0.0714286	0	0	0	1.75074	1.75074	2.63593	0	0	0	1	0.501865	312.6	314.6	314.7	314.4	3.02	27
ILMN_1225085	Prkcb	Mus musculus protein kinase C, beta (Prkcb), mRNA.	7.47604	99.3628	21.2851	16.8132	3.66624	2.28537	8.28545	9.93245	3.6404	52.0719	19.4966	2.54486	17.3902	14.0729	0	1	0	1	0	0	0	0	0	1	0	0	0	0	3	0.214286	2.98077	0	0	4.06585	7.04662	7.00184	0.423007	0	0	0.576993	0.567882	381.9	385.9	386	385.4	3.79	27
ILMN_3085992	Ifi202b	Mus musculus interferon activated gene 202B (Ifi202b), mRNA.	7.46983	15.5657	62.0163	21.876	6.03001	5.09665	9.15932	8.40428	2.00574	31.2482	33.965	3.55051	3.95269	13.9887	0	0	1	1	0	0	0	0	0	1	1	0	0	0	4	0.285714	0.680935	0	0	3.25692	3.93786	6.35659	0.17292	0	0	0.82708	0.617278	363.3	367.3	367.4	366.9	4.73	27
ILMN_1245816	Raet1b	Mus musculus retinoic acid early transcript beta (Raet1b), mRNA.	7.44876	11.1577	17.4463	10.8465	7.44628	5.27584	14.8955	4.36188	10.1764	13.9827	7.17038	3.03122	15.5312	11.7409	1	1	1	1	1	0	1	0	1	1	1	0	1	1	11	0.785714	1.05e-17	0	0	1.50784	1.50784	3.96083	6.94e-18	0	0	1	0.714484	300.5	302.5	302.6	302.3	7.51	27
ILMN_1229193	Msn		7.44863	20.2933	12.1822	13.741	4.89884	1.51162	13.1439	6.48261	2.52089	20.2311	7.40397	7.06773	9.85895	4.07201	0	1	1	1	0	0	1	0	0	1	0	0	0	0	5	0.357143	0.625261	0	0	1.87538	2.50064	4.24627	0.25004	0	0	0.74996	0.670549	318.8	322.8	322.9	322.3	5.78	27
ILMN_1259653	Gng8	Mus musculus guanine nucleotide binding protein (G protein), gamma 8 (Gng8), mRNA.	7.44437	3.40928	7.2822	7.10621	3.8386	4.80838	4.46754	6.95355	4.67741	10.7592	10.0631	2.9176	4.96846	3.83595	1	0	1	1	0	0	0	0	0	1	1	0	0	0	5	0.357143	0.451627	0	0	1.60024	2.05187	2.99425	0.220105	0	0	0.779895	0.601135	305.8	309.8	310	309.4	4.4	27
ILMN_2676876	Pdk3	Mus musculus pyruvate dehydrogenase kinase, isoenzyme 3 (Pdk3), mRNA.	7.42904	3.39129	16.3892	3.65208	4.70528	1.48674	3.46151	5.01465	1.75035	17.6737	9.64596	1.6613	4.82814	5.25179	0	0	1	0	0	0	0	0	0	1	1	0	0	0	3	0.214286	0	0	0	1.97857	1.97857	3.3138	0	0	0	1	0.552198	322.5	324.5	324.6	324.3	3.7	27
ILMN_3112268	Dnmt3l	Mus musculus DNA (cytosine-5-)-methyltransferase 3-like (Dnmt3l), transcript variant 1, mRNA.	7.40937	10.0819	19.7729	15.1189	8.46166	2.26126	12.9588	3.52934	4.65143	19.4312	4.85535	2.21236	5.2273	4.86183	0	0	1	1	1	0	1	0	0	1	0	0	0	0	5	0.357143	0	0	0	2.35632	2.35632	4.36474	0	0	0	1	0.595109	336.7	338.7	338.7	338.5	4.41	27
ILMN_1216880	Emr1	Mus musculus EGF-like module containing, mucin-like, hormone receptor-like sequence 1 (Emr1), mRNA.	7.40693	11.8828	46.105	18.495	11.166	12.4969	8.51602	16.7617	2.59519	41.5728	20.4064	5.49972	2.71578	6.8695	0	0	1	1	0	0	0	0	0	1	1	0	0	0	4	0.285714	0	0.0322	0	3.6177	3.6499	6.66214	0	0.008822	0	0.991178	0.595802	372.1	376.1	376.2	375.7	4.33	27
ILMN_1225037	Grit	Mus musculus Rho GTPase-activating protein (Grit), mRNA.	7.40449	1.7484	1.15753	2.14866	1.15334	1.31139	-1.33995	1.81664	1.68651	2.35153	6.12018	2.63019	2.57481	2.54927	1	0	0	0	0	0	0	0	0	0	1	0	0	0	2	0.142857	0	0	0	1.06754	1.06754	1.46621	0	0	0	1	0.45393	272.5	274.5	274.6	274.3	2.49	27
ILMN_2652482	Dfna5h	Mus musculus deafness, autosomal dominant 5 homolog (human) (Dfna5h), mRNA.	7.38527	4.65818	6.68163	2.90303	3.22925	2.70617	3.56169	2.45743	2.55585	3.04794	2.95867	1.79062	1.52869	3.02185	1	0	1	0	0	0	0	0	0	0	0	0	0	0	2	0.142857	1.88661	0	0.163779	0.977367	3.02775	1.92388	0.623105	0	0.054092	0.322803	0.669856	278.6	284.6	284.9	284	3.83	27
ILMN_2596522	Mt1	Mus musculus metallothionein 1 (Mt1), mRNA.	7.38041	7.48603	10.4559	6.93964	3.58974	3.39627	9.18653	6.76681	3.56508	13.9475	6.75591	2.55353	7.64774	8.37695	1	1	1	1	0	0	1	1	0	1	1	0	1	1	10	0.714286	0.028818	0	0	0.93337	0.962188	2.71417	0.02995	0	0	0.97005	0.742298	261.7	265.7	265.9	265.3	8.61	27
ILMN_2904137	Ambp	Mus musculus alpha 1 microglobulin/bikunin (Ambp), mRNA.	7.37184	5.19539	22.7663	3.77375	1.73135	1.55531	3.55646	2.47804	3.35392	8.25156	3.16022	2.07827	5.35319	1.7878	0	0	1	0	0	0	0	0	0	0	0	0	0	0	1	0.0714286	0	0	0	1.87722	1.87722	2.93838	0	0	0	1	0.520854	318.3	320.3	320.3	320.1	3.26	27
ILMN_1246876	Kit		7.35921	10.9187	5.09162	10.7456	6.07187	2.77051	4.91741	14.4919	4.54335	16.686	5.41421	1.36666	3.04125	4.51748	0	0	0	1	0	0	0	1	0	1	0	0	0	0	3	0.214286	3.04357	0	0	2.03561	5.07918	3.94147	0.599224	0	0	0.400776	0.616375	326.3	330.3	330.5	329.9	4.62	27
ILMN_1249776	Insl3	Mus musculus insulin-like 3 (Insl3), mRNA.	7.34786	7.74554	6.01327	12.061	4.82022	7.14322	6.14673	3.12683	3.39481	32.8776	10.4782	1.79308	8.41988	6.63636	0	0	0	0	0	0	0	0	0	1	0	0	0	0	1	0.0714286	2.65707	0	0	3.66665	6.32371	5.20818	0.420175	0	0	0.579825	0.476085	373.5	377.5	377.6	377.1	2.64	27
ILMN_2672297	Gcnt1	Mus musculus glucosaminyl (N-acetyl) transferase 1, core 2 (Gcnt1), mRNA.	7.33591	17.6729	30.1921	31.3137	6.67848	4.64346	12.2865	5.56064	2.2775	20.9707	5.71202	3.50084	12.9801	1.75717	0	1	1	1	0	0	1	0	0	1	0	0	1	0	6	0.428571	0	0	0	2.04015	2.04015	4.57344	0	0	0	1	0.665435	325	327	327.1	326.8	5.97	27
ILMN_1244424	Adora2b	Mus musculus adenosine A2b receptor (Adora2b), mRNA.	7.30964	7.21267	10.2294	24.1612	3.95205	3.11866	11.14	3.66313	2.63657	10.3185	3.8859	1.4074	11.015	5.47303	0	0	1	1	0	0	1	0	0	0	0	0	0	0	3	0.214286	0	0.009212	0	1.92581	1.93503	3.73781	0	0.004761	0	0.995239	0.615265	320.7	324.7	324.9	324.3	4.75	27
ILMN_1221817	Cd74	Mus musculus CD74 antigen (invariant polypeptide of major histocompatibility complex, class II antigen-associated) (Cd74), transcript variant 1, mRNA.	7.29281	15.6284	13.2779	5.86992	2.97692	2.41567	5.98429	9.94796	3.40623	10.5563	8.81188	1.90848	4.68365	6.17309	0	1	1	0	0	0	0	1	0	1	1	0	0	0	5	0.357143	1.39635	0	0	1.7332	3.12955	3.29391	0.446182	0	0	0.553818	0.608542	312.9	316.9	317	316.4	4.55	27
ILMN_2811737	Casp4	Mus musculus caspase 4, apoptosis-related cysteine peptidase (Casp4), mRNA.	7.27438	5.49251	13.6661	10.6932	5.88915	2.04879	10.0393	3.73776	2.30264	17.0918	4.98692	1.85931	4.01055	3.46405	0	0	1	1	0	0	1	0	0	1	0	0	0	0	4	0.285714	3.74039	0	0	1.84707	5.58746	3.56949	0.669425	0	0	0.330575	0.615859	318.7	322.7	322.9	322.3	4.42	27
ILMN_1236889	Selp	Mus musculus selectin, platelet (Selp), mRNA.	7.26695	13.9323	6.40323	3.94018	2.89547	1.91653	4.1367	5.54313	3.81293	6.7039	4.8503	2.1479	16.5279	3.97448	1	1	1	0	0	0	0	0	0	0	0	0	1	0	4	0.285714	0.268046	0	0	1.39323	1.66128	2.70658	0.161349	0	0	0.838651	0.615409	294.5	298.5	298.6	298.1	4.46	27
ILMN_3139875	Acot1	Mus musculus acyl-CoA thioesterase 1 (Acot1), mRNA.	7.26217	-1.2755	-1.52607	1.22473	1.27371	1.69966	1.58636	1.30369	1.68403	-1.14639	-1.24216	-1.04234	1.49257	1.44611	1	0	0	0	0	0	0	0	0	0	0	0	0	0	1	0.0714286	0	0	0.182302	0.593292	0.775594	1.26497	0	0	0.235048	0.764952	0.715767	244.5	248.5	248.6	248	3.4	27
ILMN_2566321	9930108O06Rik		7.25927	2.18737	6.2581	1.83851	3.18515	-1.16088	1.5478	1.08924	1.84128	2.85805	5.023	1.27629	1.87879	1.42893	1	0	1	0	0	0	0	0	0	0	1	0	0	0	3	0.214286	0	0.00358	0.025887	0.76461	0.794077	1.30014	0	0.004508	0.0326	0.962892	0.574597	248.5	254.5	254.8	253.9	3.63	27
ILMN_1218366	C230081A13Rik		7.23416	4.51941	6.4706	2.43463	4.79118	4.78427	6.14989	5.09039	3.80282	7.37529	3.96969	1.10619	1.61228	8.40977	1	0	1	0	1	0	1	0	0	1	0	0	0	1	6	0.428571	0	0	0	1.15555	1.15555	2.33214	0	0	0	1	0.628383	279	281	281	280.8	5.07	27
ILMN_1214137	LOC229810		7.22088	12.5731	7.57017	12.8417	3.91725	3.5373	11.3233	2.27013	5.7979	7.16715	5.78734	2.18455	5.0284	4.70616	0	0	0	1	0	0	1	0	0	0	0	0	0	0	2	0.142857	0	0	0	2.0346	2.0346	3.46896	0	0	0	1	0.560113	324.8	326.8	326.8	326.6	3.82	27
ILMN_2642417	Mest	Mus musculus mesoderm specific transcript (Mest), mRNA.	7.18929	8.97513	14.7787	1.98102	1.41227	1.74896	4.02721	2.75738	1.86636	3.45464	5.4955	1.93192	4.11616	4.81837	1	1	1	0	0	0	0	0	0	0	0	0	0	0	3	0.214286	1.61655	0	0.509895	1.38583	3.51228	2.72926	0.460257	0	0.145175	0.394568	0.702454	317.1	323.1	323.4	322.5	3.24	27
ILMN_1236539	Pfkl	Mus musculus phosphofructokinase, liver, B-type (Pfkl), mRNA.	7.17896	6.22324	7.07081	6.19833	3.98622	4.73093	7.0626	6.64595	4.72898	9.51673	5.14136	2.65899	6.93198	4.90377	1	1	1	1	1	1	1	1	1	1	1	0	1	1	13	0.928571	0.397666	0	0	0.877711	1.27538	2.41071	0.311803	0	0	0.688197	0.728668	257.4	261.4	261.6	261	7.82	27
ILMN_1239102	H2-Eb1	Mus musculus histocompatibility 2, class II antigen E beta (H2-Eb1), mRNA.	7.17685	9.51498	19.2425	4.44197	2.89026	1.90561	5.11155	13.2772	3.78125	9.52311	8.24846	1.6499	3.15178	5.63422	0	0	1	0	0	0	0	1	0	0	1	0	0	0	3	0.214286	1.29379	0	0	1.72325	3.01703	3.3156	0.428828	0	0	0.571172	0.613262	312.3	316.3	316.5	315.9	4.61	27
ILMN_2591502	A130052D22		7.16318	4.02829	5.19212	3.48365	1.45518	-1.02555	2.4986	2.45322	3.32694	9.0593	6.16606	2.94964	3.97531	2.50589	1	0	0	0	0	0	0	0	0	1	0	0	0	0	2	0.142857	0.383573	0.005926	0.245819	1.41931	2.05462	2.54757	0.186688	0.002884	0.119642	0.690786	0.638378	308.3	316.3	316.9	315.5	3.01	27
ILMN_2890935	Avpr1a	Mus musculus arginine vasopressin receptor 1A (Avpr1a), mRNA.	7.15747	7.76849	6.51222	4.56211	4.95725	3.33093	4.75722	3.26046	3.5076	4.19005	2.1936	-1.04682	2.91791	3.58013	1	0	1	0	0	0	0	0	0	0	0	0	0	0	2	0.142857	0	0	0.074666	1.42317	1.49783	2.39318	0	0	0.049849	0.950151	0.575209	299.9	303.9	304	303.5	3.51	27
ILMN_2416628	Cyth4	Mus musculus cytohesin 4 (Cyth4), mRNA.	7.15264	14.923	31.5573	13.4564	5.33371	6.49059	10.2394	11.5747	4.98419	36.3303	14.0815	3.42623	11.4087	6.42813	0	1	1	1	0	0	1	1	0	1	1	0	0	0	7	0.5	0.424441	0	0	2.04321	2.46765	4.79895	0.172002	0	0	0.827998	0.681967	325.5	329.5	329.7	329.1	6.29	27
ILMN_2722996	Sirpa	Mus musculus signal-regulatory protein alpha (Sirpa), mRNA.	7.14	14.429	15.7633	8.57086	4.95382	5.08942	7.73671	7.171	3.45638	22.5783	10.264	2.30737	7.85204	6.56047	1	1	1	1	0	0	1	1	0	1	1	0	0	0	8	0.571429	0.117344	0	0	1.46957	1.58692	3.49895	0.073945	0	0	0.926055	0.685608	298.6	302.6	302.8	302.2	6.49	27
ILMN_2742928	Fxyd5	Mus musculus FXYD domain-containing ion transport regulator 5 (Fxyd5), mRNA.	7.13951	6.90592	18.5311	13.9925	7.83504	4.6696	20.0824	5.81881	5.36309	43.7325	8.51732	2.51348	19.7969	8.60525	0	0	1	1	1	0	1	0	0	1	1	0	1	0	7	0.5	0.723151	0	0	1.71813	2.44129	4.4892	0.296217	0	0	0.703783	0.714711	311.8	315.8	315.9	315.4	7.02	27
ILMN_2743003	Ly96	Mus musculus lymphocyte antigen 96 (Ly96), mRNA.	7.13864	8.83135	18.4503	7.89544	6.26311	3.11509	3.93657	10.2163	3.80845	9.55507	19.2192	1.59545	3.26896	9.16007	0	0	1	0	0	0	0	0	0	0	1	0	0	0	2	0.142857	0	0	0	2.37329	2.37329	4.26524	0	0	0	1	0.58268	337.3	339.3	339.3	339	4.19	27
ILMN_2692797	Slc11a1	Mus musculus solute carrier family 11 (proton-coupled divalent metal ion transporters), member 1 (Slc11a1), mRNA.	7.13123	22.799	19.0194	36.0149	8.14537	5.30462	18.3945	5.38305	2.42863	18.0047	5.0589	3.1366	6.39008	-1.07808	0	1	1	1	1	0	1	0	0	1	0	0	0	0	6	0.428571	0	0	0	2.25745	2.25745	4.96114	0	0	0	1	0.658731	333.2	335.2	335.3	335	5.79	27
ILMN_2938904	Gsto2	Mus musculus glutathione S-transferase omega 2 (Gsto2), mRNA.	7.11863	1.29	1.67676	3.46275	5.44964	1.94774	2.13415	2.93686	-1.07809	3.69387	2.66669	-1.16494	2.22345	3.31715	1	0	0	0	1	0	0	0	0	0	0	0	0	0	2	0.142857	0.254905	0.010484	0.137945	1.47223	1.87556	2.069	0.135908	0.00559	0.073548	0.784953	0.512405	306.3	314.3	314.8	313.5	2.11	27
ILMN_1251390	Tbxas1	Mus musculus thromboxane A synthase 1, platelet (Tbxas1), mRNA.	7.10421	2.80325	9.05663	2.36005	2.88458	4.73791	4.91646	3.6526	3.54931	8.03538	11.0076	3.40246	6.37268	6.61735	0	0	1	0	0	0	0	0	0	0	1	0	0	0	2	0.142857	0	0.016625	0.037831	1.79972	1.85417	3.04813	0	0.008966	0.020403	0.97063	0.56931	317.2	323.2	323.5	322.6	3.66	27
ILMN_2419998	Soat1	Mus musculus sterol O-acyltransferase 1 (Soat1), mRNA.	7.10323	9.58692	29.6703	20.1429	12.8966	3.99702	8.94722	4.70689	4.219	17.67	11.0102	2.47869	8.56271	9.32496	0	0	1	1	1	0	1	0	0	1	1	0	0	0	6	0.428571	0.894538	0.008107	0	1.81433	2.71697	4.25199	0.32924	0.002984	0	0.667776	0.683377	316.6	322.6	322.9	322	6.28	27
ILMN_1260585	Stfa2	Mus musculus stefin A2 (Stfa2), mRNA. XM_148531 XM_915403	7.09044	3.42839	5.30481	3.81198	2.72935	1.02262	12.2565	1.89697	1.21476	2.62273	1.22378	2.35779	6.03241	4.48741	1	0	1	0	0	0	1	0	0	0	0	0	0	0	3	0.214286	0	0	0.119045	1.15241	1.27146	2.17333	0	0	0.093629	0.906371	0.636481	286.4	290.4	290.5	289.9	4.07	27
ILMN_2671923	Ly86	Mus musculus lymphocyte antigen 86 (Ly86), mRNA.	7.08405	6.78117	37.7643	6.46809	7.62015	2.64575	10.2224	12.974	1.69843	26.9809	17.5619	1.24075	2.74239	4.73569	0	0	1	0	0	0	0	0	0	1	1	0	0	0	3	0.214286	0	0	0.262944	3.22517	3.48811	5.383	0	0	0.075383	0.924617	0.582233	368.2	372.2	372.4	371.8	3.37	27
ILMN_2535227	Tmem45a	Mus musculus transmembrane protein 45a (Tmem45a), mRNA.	7.07228	8.6664	14.9817	23.4199	7.91638	13.2331	27.0797	7.80974	2.7271	7.61864	7.0361	1.644	11.0234	3.14249	0	0	1	1	1	1	1	0	0	0	0	0	0	0	5	0.357143	1.40102	0	0	1.84991	3.25093	4.48042	0.43096	0	0	0.56904	0.692778	318.1	322.1	322.2	321.7	6.46	27
ILMN_1240256	Slc9a3r1	Mus musculus solute carrier family 9 (sodium/hydrogen exchanger), member 3 regulator 1 (Slc9a3r1), mRNA.	7.04561	16.2144	11.0423	4.44179	4.48653	2.73052	6.29192	10.7075	4.67605	6.06553	10.7014	1.46695	8.08324	6.44297	0	1	1	0	0	0	0	1	0	0	1	0	0	0	4	0.285714	1.09058	0	0	2.26442	3.35499	3.83139	0.325061	0	0	0.674939	0.559634	334.2	338.2	338.4	337.8	3.72	27
ILMN_2807335	3110001A13Rik	Mus musculus RIKEN cDNA 3110001A13 gene (3110001A13Rik), mRNA.	7.0411	18.9847	10.9515	3.52934	-1.0209	1.6974	5.07272	6.54299	1.9413	6.65974	2.74366	-1.57746	5.89394	2.04138	0	1	1	0	0	0	0	0	0	0	0	0	0	0	2	0.142857	0	0	0	2.3772	2.3772	3.23843	0	0	0	1	0.449456	337.4	339.4	339.4	339.2	2.45	27
ILMN_1242170	Adra2a	Mus musculus adrenergic receptor, alpha 2a (Adra2a), mRNA.	7.035	5.75786	6.10546	7.75776	3.28602	4.10249	3.87651	4.47357	4.88926	8.33356	4.14688	2.83874	3.65803	5.24266	1	0	1	1	0	0	0	0	1	1	0	0	0	1	6	0.428571	0.321619	0	0	0.981799	1.30342	2.2032	0.246751	0	0	0.753249	0.66757	266.3	270.3	270.5	269.9	5.87	27
ILMN_3089584	Cd74	Mus musculus CD74 antigen (invariant polypeptide of major histocompatibility complex, class II antigen-associated) (Cd74), transcript variant 2, mRNA.	7.03414	14.7186	14.2151	5.52158	3.24428	2.28758	5.98769	11.7558	3.89615	10.9843	8.79525	1.87862	4.23071	5.30245	0	1	1	0	0	0	0	1	0	1	1	0	0	0	5	0.357143	1.14342	0	0	1.70251	2.84593	3.29202	0.401773	0	0	0.598227	0.615053	311.3	315.3	315.4	314.9	4.69	27
ILMN_2729634	Cklf	Mus musculus chemokine-like factor (Cklf), transcript variant 4, mRNA.	7.03256	3.54487	14.685	9.24735	4.29852	4.1522	8.38877	4.30765	5.69987	16.9745	8.64655	2.33414	5.90853	3.72909	0	0	1	1	0	0	1	0	0	1	1	0	0	0	5	0.357143	0.126617	0	0	1.88499	2.0116	3.61838	0.062943	0	0	0.937057	0.609943	318.7	322.7	322.9	322.3	4.57	27
ILMN_2686244	Rassf4	Mus musculus Ras association (RalGDS/AF-6) domain family member 4 (Rassf4), mRNA.	7.0261	28.7197	19.7465	22.6014	5.39993	4.95608	9.25748	16.2166	4.47837	25.69	9.54272	4.45582	5.11571	5.65893	0	1	1	1	0	0	1	1	0	1	0	0	0	0	6	0.428571	0	0	0.042363	2.35873	2.40109	4.96193	0	0	0.017643	0.982357	0.649662	338.2	342.2	342.3	341.8	5.34	27
ILMN_2757125	Prc1	Mus musculus protein regulator of cytokinesis 1 (Prc1), mRNA.	7.01576	13.6122	23.4977	23.9478	13.7765	12.5127	13.2036	20.8034	3.20727	49.2232	16.1381	5.74859	13.3349	18.0544	0	0	1	1	1	0	1	1	0	1	1	0	0	0	7	0.5	3.00232	0	0	3.01472	6.01704	6.49574	0.49897	0	0	0.50103	0.654924	357.8	361.8	362	361.4	5.51	27
ILMN_2630605	Fscn1	Mus musculus fascin homolog 1, actin bundling protein (Strongylocentrotus purpuratus) (Fscn1), mRNA.	7.00083	14.739	3.71362	11.2897	2.71991	3.3717	4.12044	5.43103	3.83188	7.94621	5.95582	3.06547	3.29322	4.56014	0	1	0	1	0	0	0	0	0	0	0	0	0	0	2	0.142857	0	0	0.073113	1.65797	1.73109	3.0472	0	0	0.042235	0.957765	0.60849	311.6	315.6	315.8	315.2	4.16	27
ILMN_1231601	4930477M19		6.99101	7.88385	8.99766	2.39781	5.44949	1.95501	3.30072	7.69195	4.29795	12.3477	3.95712	1.57987	3.7502	5.94274	1	1	1	0	1	0	0	1	0	1	0	0	0	1	7	0.5	0	0	0.298036	1.08482	1.38286	2.54053	0	0	0.215522	0.784478	0.736988	291.7	295.7	295.8	295.2	5.35	27
ILMN_1237959	Nisch		6.98822	8.14623	6.18651	4.21876	7.53851	3.36382	4.35176	2.31811	4.26391	9.04487	8.46611	1.06819	6.03603	1.98643	1	0	0	0	1	0	0	0	0	1	1	0	0	0	4	0.285714	0	0	0.080893	1.49982	1.58072	2.74818	0	0	0.051175	0.948825	0.610651	304.2	308.2	308.4	307.8	4.12	27
ILMN_1223082	Itpripl2	Mus musculus inositol 1,4,5-triphosphate receptor interacting protein-like 2 (Itpripl2), mRNA.	6.98786	14.0832	7.65008	5.08229	4.70358	3.58985	4.4108	3.52739	3.69335	12.0322	7.50876	2.73459	5.08201	4.49052	0	1	0	0	0	0	0	0	0	1	0	0	0	0	2	0.142857	0.167174	0	0	1.83576	2.00294	3.19023	0.083465	0	0	0.916535	0.569359	316.6	320.6	320.8	320.2	3.86	27
ILMN_2983516	Slc11a1	Mus musculus solute carrier family 11 (proton-coupled divalent metal ion transporters), member 1 (Slc11a1), mRNA.	6.96634	7.22334	17.2856	8.49833	10.8552	3.24963	9.39609	7.19802	2.47172	12.2335	5.30784	1.81219	6.58325	5.71733	1	0	1	1	1	0	1	1	0	1	0	0	0	0	7	0.5	0	0	0	1.49879	1.49878	3.35189	0	0	0	1	0.66464	300	302	302.1	301.8	5.95	27
ILMN_2668319	Hsp90aa1	Mus musculus heat shock protein 90, alpha (cytosolic), class A member 1 (Hsp90aa1), mRNA.	6.96585	11.6141	9.55314	6.79136	4.42059	1.62192	6.90356	2.81884	2.14495	6.73697	5.40071	-1.04762	3.35955	7.25424	0	0	1	0	0	0	1	0	0	0	0	0	0	0	2	0.142857	0	0	0	1.94861	1.94861	3.27772	0	0	0	1	0.554123	321.3	323.3	323.3	323.1	3.73	27
ILMN_2863837	Alox5ap	Mus musculus arachidonate 5-lipoxygenase activating protein (Alox5ap), mRNA.	6.96284	10.6528	17.9748	9.97239	5.45599	4.33934	10.2298	11.2083	2.93286	22.0682	7.97066	2.86477	8.08847	6.54235	1	1	1	1	1	0	1	1	0	1	1	0	0	0	9	0.642857	0.162229	0	0	1.50114	1.66337	3.77798	0.09753	0	0	0.90247	0.702737	300.4	304.4	304.5	304	6.87	27
ILMN_2618148	C330008K14Rik		6.96175	3.2732	7.5154	3.26327	4.05174	2.70223	6.23651	7.11629	6.51125	10.3843	2.37673	3.14821	3.61109	2.46165	0	0	1	0	0	0	1	0	0	1	0	0	0	0	3	0.214286	1.00092	0	0	1.69593	2.69685	2.95722	0.371144	0	0	0.628856	0.57296	310.9	314.9	315.1	314.5	3.49	27
ILMN_1216487	Trrap	PREDICTED: Mus musculus transformation/transcription domain-associated protein, transcript variant 1 (Trrap), mRNA.	6.94633	5.10449	1.67778	2.12061	2.15269	-2.48329	2.08389	1.73354	1.22173	2.55342	4.66823	1.25772	1.90013	-1.20666	1	0	0	0	0	0	0	0	0	0	1	0	0	0	2	0.142857	0	0	0.127981	0.959824	1.0878	1.57559	0	0	0.11765	0.88235	0.591416	273.5	277.5	277.7	277.1	2.92	27
ILMN_2700715	Cstb	Mus musculus cystatin B (Cstb), mRNA.	6.94127	6.22051	11.3536	6.11274	4.02375	3.41764	7.38747	5.21431	2.94027	10.1537	6.71157	2.39231	5.90444	4.93531	1	1	1	1	1	0	1	1	0	1	1	0	1	0	10	0.714286	0.07323	0	0	0.964233	1.03746	2.49737	0.070586	0	0	0.929414	0.710965	264.5	268.5	268.6	268	7.22	27
ILMN_1217041	Cd86	Mus musculus CD86 antigen (Cd86), mRNA.	6.93694	9.36427	25.4757	4.19904	4.17791	1.22173	5.77372	8.74571	4.45728	25.3662	14.052	-1.55513	5.90949	2.42482	0	0	1	0	0	0	0	0	0	0	0	0	0	0	1	0.0714286	0	0	0	3.40998	3.40998	4.81785	0	0	0	1	0.469165	366.6	368.6	368.7	368.4	2.65	27
ILMN_2813712	Ahi1	Mus musculus Abelson helper integration site (Ahi1), mRNA.	6.93502	10.0287	14.2602	7.34244	5.49447	1.8168	3.6728	1.52372	8.11983	13.13	6.30032	8.22227	7.11699	5.54838	0	0	1	0	0	0	0	0	0	0	0	0	0	0	1	0.0714286	0	0	0.788192	2.487	3.2752	4.53885	0	0	0.240655	0.759345	0.669472	361	365	365.2	364.6	3.14	27
ILMN_1233545	Lbh	Mus musculus limb-bud and heart (Lbh), mRNA.	6.90038	6.43675	7.06432	9.4524	3.59711	3.07919	5.46643	6.30283	3.69366	10.8867	3.95787	3.77258	4.47752	5.42291	0	0	1	1	0	0	0	0	0	1	0	0	0	0	3	0.214286	0	0	0	1.5703	1.5703	2.87355	0	0	0	1	0.59015	303.8	305.8	305.9	305.6	4.32	27
ILMN_2627296	Pvr	Mus musculus poliovirus receptor (Pvr), mRNA.	6.8938	6.05307	3.25216	4.34628	3.10067	2.17879	6.38949	1.36089	1.71342	1.44203	3.206	1.40323	2.38177	-1.00367	1	1	0	1	0	0	1	0	0	0	0	0	0	0	4	0.285714	0	0.028816	0.004205	0.763682	0.796703	1.67837	0	0.036169	0.005278	0.958554	0.667762	248.1	254.1	254.4	253.5	5.64	27
ILMN_1249727	Car13	Mus musculus carbonic anhydrase 13 (Car13), mRNA.	6.88318	7.5374	20.4464	12.6307	7.63104	6.38406	23.5462	11.8896	3.79605	26.721	9.31835	1.42484	9.34741	11.6525	0	0	1	1	0	0	1	0	0	1	0	0	0	0	4	0.285714	0.634499	0	0	2.89028	3.52478	5.40202	0.180011	0	0	0.819989	0.6004	353.6	357.6	357.8	357.2	4.25	27
ILMN_1235062	BC030183	Mus musculus cDNA sequence BC030183 (BC030183), mRNA.	6.87829	10.9723	22.1449	4.19526	4.50791	6.61229	10.061	3.69289	3.64193	31.467	6.36352	3.36343	6.3948	13.2823	0	0	1	0	0	0	1	0	0	1	0	0	0	0	3	0.214286	0.206124	0	0	2.54245	2.74858	4.54616	0.074993	0	0	0.925007	0.581384	343	347	347.2	346.6	4.07	27
ILMN_2484278	9930031P18Rik		6.87769	27.819	7.8465	5.85951	4.0609	1.50679	4.49207	3.83081	3.47034	12.46	12.7158	5.06425	8.0313	14.4697	0	1	0	0	0	0	0	0	0	1	1	0	0	1	4	0.285714	0	0	0	1.92064	1.92064	3.95812	0	0	0	1	0.63607	320.1	322.1	322.2	321.9	5.24	27
ILMN_1219946	Il10ra	Mus musculus interleukin 10 receptor, alpha (Il10ra), mRNA.	6.85794	45.3218	43.3324	10.6518	7.08398	8.96513	11.2201	16.429	3.8376	86.3944	19.7164	1.86976	18.3465	7.67828	0	1	1	0	0	0	0	0	0	1	0	0	0	0	3	0.214286	4.29102	0	0	3.78519	8.07621	7.22763	0.531316	0	0	0.468684	0.610736	376.4	380.4	380.5	379.9	4.43	27
ILMN_2728473	Serpina3m	Mus musculus serine (or cysteine) peptidase inhibitor, clade A, member 3M (Serpina3m), mRNA.	6.84014	5.10449	6.61114	8.72975	-1.30095	2.63308	4.12879	1.52341	3.19933	8.47688	9.75218	1.76374	2.38392	5.13965	1	0	1	1	0	0	0	0	0	1	1	0	0	0	5	0.357143	0	0.0009	0.105608	1.21429	1.32079	2.57849	0	0.000681	0.079958	0.919361	0.673235	289.5	295.5	295.8	294.9	5.05	27
ILMN_1223674	Seh1l	Mus musculus SEH1-like (S. cerevisiae (Seh1l), transcript variant 1, mRNA.	6.83741	3.99695	15.7303	7.5311	4.38762	1.91893	16.3251	6.12496	1.88362	28.443	7.20189	4.53667	15.4268	3.22124	0	0	1	1	0	0	1	0	0	1	0	0	1	0	5	0.357143	0	0	0	2.05647	2.05647	3.91524	0	0	0	1	0.606064	325.7	327.7	327.7	327.4	4.62	27
ILMN_2653765	Nusap1	Mus musculus nucleolar and spindle associated protein 1 (Nusap1), transcript variant 2, mRNA.	6.82794	6.38344	21.6463	11.794	5.18096	5.93964	5.07934	10.4169	2.77259	23.7963	8.58281	2.73101	6.94801	8.82354	0	0	1	1	0	0	0	0	0	1	0	0	0	0	3	0.214286	0	0	0	2.32666	2.32666	4.33892	0	0	0	1	0.597827	335.7	337.7	337.7	337.4	4.46	27
ILMN_1224034	Pde1b	Mus musculus phosphodiesterase 1B, Ca2+-calmodulin dependent (Pde1b), mRNA.	6.82273	8.31721	12.4837	10.1428	5.18793	3.99072	10.3985	5.01552	3.29933	13.8435	6.66221	1.76473	7.59105	5.78333	0	0	1	1	0	0	1	0	0	1	0	0	0	0	4	0.285714	1.05214	0	0	1.55589	2.60802	3.30094	0.403424	0	0	0.596576	0.649165	304	308	308.2	307.6	5.45	27
ILMN_2628969	4632418H02Rik		6.82037	3.9291	-1.56686	1.24351	2.18207	-1.28436	1.41453	-1.31035	1.45386	1.10844	1.84376	1.07951	1.65389	1.20351	1	0	0	0	0	0	0	0	0	0	0	0	0	0	1	0.0714286	0	0.005291	0.184586	1.0431	1.23297	1.48358	0	0.004292	0.149708	0.846	0.543358	283.3	289.3	289.6	288.6	1.86	27
ILMN_2627041	Cx3cl1	Mus musculus chemokine (C-X3-C motif) ligand 1 (Cx3cl1), mRNA.	6.80797	17.4457	-1.13924	1.48646	7.31602	2.38279	2.30934	8.64326	2.75023	1.52524	13.9864	1.47235	4.4611	8.31275	0	1	0	0	1	0	0	0	0	0	1	0	0	0	3	0.214286	0.325968	0	0	2.00214	2.32811	3.07781	0.140014	0	0	0.859986	0.513777	323.8	327.8	328	327.4	2.93	27
ILMN_2675223	Cd33	Mus musculus CD33 antigen (Cd33), mRNA.	6.8009	17.4445	25.5708	5.36679	4.72659	1.98646	18.475	3.47744	1.36684	13.2756	3.25453	4.10586	10.7478	2.98587	0	1	1	0	0	0	1	0	0	1	0	0	0	0	4	0.285714	0.434094	0	0	1.9825	2.41659	3.75699	0.179631	0	0	0.820369	0.605891	323.1	327.1	327.3	326.7	4.47	27
ILMN_2595842	Def6	Mus musculus differentially expressed in FDCP 6 (Def6), mRNA.	6.80078	9.75765	12.4254	6.03862	3.30553	2.4907	8.58811	9.71305	2.75573	12.6109	10.9221	1.14058	2.32479	6.10067	0	0	1	0	0	0	1	0	0	0	1	0	0	0	3	0.214286	1.07205	0	0	2.35363	3.42568	3.8862	0.312945	0	0	0.687055	0.548663	337.3	341.3	341.5	340.9	3.52	27
ILMN_2729015	LOC100048436	PREDICTED: Mus musculus similar to CDNA sequence BC049816 (LOC100048436), misc RNA.	6.79242	10.9356	10.3014	6.81475	4.46438	2.47761	2.04659	3.35421	3.68357	22.885	13.0853	2.87139	7.43157	16.9124	0	1	1	1	0	0	0	0	0	1	1	0	0	1	6	0.428571	0.233399	0	3.07e-18	1.77151	2.00491	3.47314	0.116414	0	1.53e-18	0.883586	0.618565	313.8	317.8	318	317.4	4.67	27
ILMN_1251616	Skp2	Mus musculus S-phase kinase-associated protein 2 (p45) (Skp2), transcript variant 2, mRNA.	6.77079	8.50611	12.2211	13.8058	2.84325	3.34006	4.67161	3.59677	3.10644	18.0659	7.32067	1.21239	2.79387	6.49472	0	0	1	1	0	0	0	0	0	1	1	0	0	0	4	0.285714	0	0	0	1.53762	1.53762	3.06674	0	0	0	1	0.62396	302.1	304.1	304.2	303.9	4.98	27
ILMN_2686825	5430427O19Rik	PREDICTED: Mus musculus RIKEN cDNA 5430427O19 gene, transcript variant 3 (5430427O19Rik), mRNA.	6.76903	12.9559	19.2408	20.5069	3.28506	5.60543	9.82638	5.27072	2.58098	23.0357	5.67689	2.99166	5.63676	3.62188	0	1	1	1	0	0	1	0	0	1	0	0	0	0	5	0.357143	2.34764	0	0.137888	1.85813	4.34366	4.09495	0.540476	0	0.031745	0.42778	0.684393	324.3	330.3	330.6	329.7	5.17	27
ILMN_2493826	Ugt1a10	Mus musculus UDP glycosyltransferase 1 family, polypeptide A10 (Ugt1a10), mRNA.	6.7688	11.6296	41.5226	8.78962	7.45992	4.8023	14.3958	21.1469	3.15556	60.0559	10.714	2.71653	10.3786	5.9667	0	0	1	1	0	0	1	1	0	1	1	0	0	0	6	0.428571	0	0	0	2.33697	2.33697	5.16288	0	0	0	1	0.660513	336	338	338.1	337.8	5.84	27
ILMN_2520239	Cp		6.7476	3.97164	5.41871	9.0534	2.36982	2.09925	4.00183	3.45719	2.965	5.30089	3.13437	1.26749	1.86913	3.08077	1	0	0	1	0	0	0	0	0	0	0	0	0	0	2	0.142857	0.553101	0	0	1.2753	1.8284	2.07994	0.302506	0	0	0.697494	0.543001	287.6	291.6	291.8	291.2	3.47	27
ILMN_2733793	Coro1a	Mus musculus coronin, actin binding protein 1A (Coro1a), mRNA.	6.74293	11.8858	41.8013	14.8827	5.2554	3.11067	15.8077	10.1026	2.11654	26.0624	11.0217	2.27787	6.08631	9.23626	0	0	1	0	0	0	0	0	0	0	0	0	0	0	1	0.0714286	0.641911	0	0	4.13745	4.77936	6.57428	0.134309	0	0	0.865691	0.529547	382.6	386.6	386.7	386.2	3.2	27
ILMN_1228385	Itpr3	Mus musculus inositol 1,4,5-triphosphate receptor 3 (Itpr3), mRNA.	6.74258	3.31743	1.8516	7.32394	1.87231	1.53491	3.24649	3.48788	1.5623	3.78817	4.17948	1.21446	8.14981	3.58388	0	0	0	1	0	0	0	0	0	0	0	0	0	0	1	0.0714286	0	0	0.05036	1.63615	1.68651	2.33925	0	0	0.029861	0.970139	0.490653	309.6	313.6	313.7	313.1	2.59	27
ILMN_2454204	Tnfrsf22		6.74082	20.4118	8.28973	18.1697	5.83034	3.58345	12.7703	3.2462	3.45451	5.56687	5.25913	2.69509	5.3118	3.45258	0	1	1	1	1	0	1	0	0	0	0	0	0	0	5	0.357143	0	0	0	1.63139	1.63139	3.62121	0	0	0	1	0.662118	306.9	308.9	308.9	308.7	5.88	27
ILMN_1255860	Klrd1	Mus musculus killer cell lectin-like receptor, subfamily D, member 1 (Klrd1), mRNA.	6.74059	13.8883	30.4485	2.14786	4.90475	2.07189	5.27357	12.4457	2.307	11.1325	7.30774	1.60978	2.96459	5.68177	0	0	1	0	0	0	0	0	0	0	0	0	0	0	1	0.0714286	3.50978	0	0	3.34251	6.85229	4.98094	0.512205	0	0	0.487795	0.501118	366.2	370.2	370.4	369.8	2.64	27
ILMN_1224336	Spsb1	Mus musculus splA/ryanodine receptor domain and SOCS box containing 1 (Spsb1), mRNA.	6.7118	5.74325	4.74514	3.17655	2.77037	2.32346	3.79253	3.15787	2.9772	5.51961	3.23861	2.29729	4.17729	4.71478	1	1	1	0	0	0	1	0	0	1	0	0	0	1	6	0.428571	0	0	0	0.747416	0.747416	1.59058	0	0	0	1	0.647575	243.7	245.7	245.7	245.5	5.51	27
ILMN_2992709	Trem2	Mus musculus triggering receptor expressed on myeloid cells 2 (Trem2), mRNA.	6.7082	19.9982	160.633	104.502	17.3726	35.9171	75.0479	73.8244	3.09332	141.959	22.5128	2.77329	75.874	42.1215	0	0	1	1	0	1	1	1	0	1	0	0	1	1	8	0.571429	0	0	0	4.38683	4.38683	10.9369	0	0	0	1	0.699172	387	389	389.1	388.8	6.97	27
ILMN_2937738	Irak2	Mus musculus interleukin-1 receptor-associated kinase 2 (Irak2), mRNA.	6.7032	4.68073	5.3715	5.86048	2.59605	1.10888	2.54637	2.52109	2.08825	4.3871	2.65052	1.147	2.12138	1.73957	1	0	1	1	0	0	0	0	0	0	0	0	0	0	3	0.214286	0.155831	0.006994	0.018003	1.00401	1.18483	1.58629	0.131521	0.005903	0.015195	0.847381	0.539152	266.7	274.7	275.3	273.9	3.15	27
ILMN_1229210	LOC640739	PREDICTED: Mus musculus hypothetical LOC640739 (LOC640739), mRNA.	6.69577	7.69435	17.5497	22.517	3.29605	4.10242	9.34089	5.65695	4.11623	20.0751	16.0761	2.75993	4.48767	6.91023	0	0	1	1	0	0	1	0	0	1	1	0	0	0	5	0.357143	0	0	0	2.16733	2.16733	4.24617	0	0	0	1	0.617186	329.9	331.9	332	331.7	4.84	27
ILMN_2728889	Sdk1	Mus musculus sidekick homolog 1 (chicken) (Sdk1), mRNA.	6.69171	8.09501	12.5729	19.045	5.72137	6.59204	9.95872	2.32398	7.78612	71.47	14.2212	6.96835	15.3535	3.18914	0	0	0	1	0	0	0	0	0	1	1	0	0	0	3	0.214286	0	0	0	2.83695	2.83695	5.24924	0	0	0	1	0.594663	351.7	353.7	353.8	353.5	4.4	27
ILMN_2773113	Capg	Mus musculus capping protein (actin filament), gelsolin-like (Capg), transcript variant 1, mRNA.	6.68951	7.9264	19.2993	9.15932	5.99683	3.85933	11.3217	8.32125	4.91779	16.457	10.7038	3.35024	8.62206	7.69431	1	0	1	1	1	0	1	1	0	1	1	0	1	1	10	0.714286	0.531685	0	0	1.39486	1.92654	3.60701	0.275979	0	0	0.724021	0.711655	294.8	298.8	299	298.4	7.22	27
ILMN_1216764	Ier3	Mus musculus immediate early response 3 (Ier3), mRNA.	6.68348	7.88002	7.63948	4.08988	2.14373	2.21914	6.80097	2.87318	2.74355	5.56571	2.86563	1.6228	4.88051	3.27677	1	1	1	1	0	0	1	0	0	1	0	0	1	0	7	0.5	0	0	0	0.694962	0.694962	1.72087	0	0	0	1	0.697117	237.8	239.8	239.8	239.6	6.9	27
ILMN_2878979	Tnfaip8l2	Mus musculus tumor necrosis factor, alpha-induced protein 8-like 2 (Tnfaip8l2), mRNA.	6.66544	5.04423	42.6286	3.91855	1.91616	4.56701	5.31526	5.82658	2.21989	26.2971	11.7741	4.28162	3.14153	2.275	0	0	1	0	0	0	0	0	0	1	1	0	0	0	3	0.214286	1.62301	0	0	2.14615	3.76916	4.06944	0.430604	0	0	0.569396	0.607581	330.1	334.1	334.3	333.7	4.47	27
ILMN_1219574	Hist1h2af	Mus musculus histone cluster 1, H2af (Hist1h2af), mRNA.	6.66013	8.29821	23.3459	12.9887	3.93275	2.92285	8.99261	14.7067	2.73699	16.1624	8.62874	2.44151	7.78771	12.6914	0	0	1	1	0	0	1	1	0	0	0	0	0	0	4	0.285714	0.494901	0	0	2.48789	2.9828	4.66065	0.165919	0	0	0.834081	0.60121	341.5	345.5	345.6	345	4.36	27
ILMN_2730293	Pde1b		6.66001	11.5605	13.462	7.85178	4.67433	3.31308	8.89072	5.40006	3.647	19.5781	6.89679	1.56412	6.26392	4.96752	0	1	1	1	0	0	1	0	0	1	1	0	0	0	6	0.428571	1.35021	0	0	1.51545	2.86566	3.22408	0.471168	0	0	0.528832	0.650408	302	306	306.2	305.6	5.47	27
ILMN_2501489	Was	Mus musculus Wiskott-Aldrich syndrome homolog (human) (Was), mRNA.	6.65563	18.0501	32.422	12.2145	5.06064	3.30431	7.62734	24.7058	1.67156	16.4506	17.037	1.22398	5.53251	11.9737	0	0	1	0	0	0	0	1	0	0	1	0	0	0	3	0.214286	0	0	0.178669	3.35115	3.52982	5.82482	0	0	0.050617	0.949383	0.589335	369.3	373.3	373.5	372.9	3.74	27
ILMN_2956092	Rassf4	Mus musculus Ras association (RalGDS/AF-6) domain family member 4 (Rassf4), mRNA.	6.65494	34.2358	15.9386	15.5964	6.53361	4.75971	6.95283	7.91643	3.78901	22.7207	11.8294	3.23521	4.94704	4.43979	0	1	1	1	0	0	0	0	0	1	1	0	0	0	5	0.357143	0.270107	0	0	2.16442	2.43453	4.44207	0.110948	0	0	0.889052	0.635576	330.1	334.1	334.2	333.6	5.14	27
ILMN_2735184	Col18a1	Mus musculus procollagen, type XVIII, alpha 1 (Col18a1), mRNA.	6.65425	8.09595	7.60765	11.3335	3.71175	4.51195	6.77415	6.01911	4.42711	12.7339	6.02506	2.19507	7.17958	7.93094	1	1	1	1	0	0	1	1	0	1	1	0	0	1	9	0.642857	0	0	0	1.28998	1.28998	3.03251	0	0	0	1	0.680963	287.9	289.9	289.9	289.7	6.4	27
ILMN_2460653	Unc93b1	Mus musculus unc-93 homolog B1 (C. elegans) (Unc93b1), mRNA.	6.65367	9.50816	11.098	8.21215	1.59937	2.81962	6.90384	3.08656	2.77191	11.95	4.52753	2.06416	4.3793	3.78271	0	0	1	0	0	0	0	0	0	0	0	0	0	0	1	0.0714286	0	0	0.104568	2.33195	2.43652	3.51743	0	0	0.042917	0.957083	0.523266	339.3	343.3	343.5	342.9	2.86	27
ILMN_2795040	Hist1h2ad	Mus musculus histone cluster 1, H2ad (Hist1h2ad), mRNA.	6.65171	21.0483	77.8972	15.8615	5.9178	4.28234	13.3888	20.0399	1.2443	94.4667	11.756	2.83199	12.8908	50.4987	0	0	1	1	0	0	0	1	0	1	0	0	0	1	5	0.357143	0	0	0	3.71067	3.71067	7.74019	0	0	0	1	0.640448	373.5	375.5	375.5	375.3	5.34	27
ILMN_2795412	Tmem176a	Mus musculus transmembrane protein 176A (Tmem176a), mRNA.	6.64825	19.1557	10.8596	14.0871	2.55893	3.91334	5.65348	5.68063	3.97728	17.3769	6.13633	2.81809	4.70915	4.97345	1	1	1	1	0	0	1	0	0	1	1	0	0	0	7	0.5	0.485563	0	0.223826	1.34478	2.05417	3.28103	0.23638	0	0.108962	0.654658	0.732332	303.4	309.4	309.7	308.8	6.04	27
ILMN_2612206	Cdc20	Mus musculus cell division cycle 20 homolog (S. cerevisiae) (Cdc20), mRNA.	6.64791	13.137	8.72935	16.0627	5.08758	3.12764	4.42887	4.40464	2.73134	11.1546	8.62635	3.43954	4.05471	6.33916	0	0	0	1	0	0	0	0	0	0	0	0	0	0	1	0.0714286	0.020007	0	0.039394	2.29648	2.35588	3.84386	0.008492	0	0.016721	0.974786	0.559459	336	342	342.3	341.4	3.6	27
ILMN_2721357	Lhfpl2	Mus musculus lipoma HMGIC fusion partner-like 2 (Lhfpl2), mRNA.	6.64376	9.8203	12.7332	6.22546	4.88473	4.08624	8.92492	6.97612	4.48049	12.6392	6.9667	2.83533	7.57423	4.2865	1	1	1	1	0	0	1	1	0	1	1	0	0	0	8	0.571429	0	0	0	1.39389	1.39388	3.04549	0	0	0	1	0.656734	294.2	296.2	296.2	295.9	5.74	27
ILMN_1244135	Arpc5	Mus musculus actin related protein 2/3 complex, subunit 5 (Arpc5), mRNA.	6.64031	8.78292	12.0432	8.04616	4.52369	3.5814	12.5333	5.87352	1.34266	17.4256	5.40277	1.63365	17.7679	5.40624	0	0	1	1	0	0	1	0	0	1	0	0	1	0	5	0.357143	1.31543	0	0	2.26214	3.57757	4.49349	0.367688	0	0	0.632312	0.625113	334.2	338.2	338.4	337.8	4.14	27
ILMN_2754698	Cd84	Mus musculus CD84 antigen (Cd84), mRNA.	6.63697	18.9606	26.4923	21.5656	10.7765	6.94272	18.5847	16.4487	3.74722	32.4745	15.1283	1.52348	26.3379	17.9283	0	0	1	1	0	0	1	1	0	1	1	0	1	0	7	0.5	3.9023	0	0	3.00515	6.90745	6.57128	0.56494	0	0	0.43506	0.660196	357.8	361.8	361.9	361.4	5.38	27
ILMN_2874491	Tnip2	Mus musculus TNFAIP3 interacting protein 2 (Tnip2), mRNA.	6.63513	9.36514	5.09639	5.63533	4.01912	1.57576	6.50379	2.68454	4.84693	5.41102	2.79554	3.55716	3.91289	6.86583	1	1	0	1	0	0	1	0	0	0	0	0	0	0	4	0.285714	3.52147	0	0	1.34545	4.86692	2.69938	0.723551	0	0	0.276449	0.630145	293.2	297.2	297.4	296.8	4.68	27
ILMN_1254343	Gm885	Mus musculus gene model 885, (NCBI) (Gm885), mRNA.	6.63088	8.88784	23.0853	14.8631	3.76148	5.39052	18.7883	2.54983	4.02791	22.3257	7.46401	2.12646	11.0377	2.58118	0	0	1	1	0	0	1	0	0	1	0	0	1	0	5	0.357143	1.56791	0	0	1.75402	3.32193	4.10467	0.471987	0	0	0.528013	0.682182	313.9	317.9	318	317.5	5.94	27
ILMN_2663130	P2ry6	Mus musculus pyrimidinergic receptor P2Y, G-protein coupled, 6 (P2ry6), mRNA.	6.6264	13.6352	21.7305	6.21804	5.21722	3.73984	7.89074	7.07289	3.31844	22.4301	9.25158	2.45711	6.92493	4.73539	0	1	1	1	0	0	1	0	0	1	1	0	0	0	6	0.428571	0.179207	0	0	1.64324	1.82245	3.61969	0.098333	0	0	0.901667	0.660373	307.7	311.7	311.9	311.3	5.73	27
ILMN_2630753	Aldh1a2	Mus musculus aldehyde dehydrogenase family 1, subfamily A2 (Aldh1a2), mRNA.	6.62525	4.41445	6.88688	1.17575	-1.38676	1.47634	1.97838	1.49309	1.63998	2.55661	-1.00486	1.16235	-1.03756	1.089	1	0	1	0	0	0	0	0	0	0	0	0	0	0	2	0.142857	0	0	0	0.957906	0.957906	1.46887	0	0	0	1	0.510898	263.8	265.8	265.8	265.6	3.13	27
ILMN_2776850	Gas7	Mus musculus growth arrest specific 7 (Gas7), mRNA.	6.62376	31.9099	20.0083	20.5041	8.40134	2.22507	7.39474	14.9474	1.74286	50.9838	10.9458	3.53589	4.46832	5.63351	0	1	1	1	0	0	0	0	0	1	0	0	0	0	4	0.285714	0.032651	0	0	3.34482	3.37747	5.69929	0.009667	0	0	0.990333	0.559959	365.1	369.1	369.2	368.7	3.8	27
ILMN_2737163	Sqle	Mus musculus squalene epoxidase (Sqle), mRNA.	6.61573	2.38513	3.10227	3.30965	2.2061	2.57938	4.17825	4.88243	1.7089	3.90611	2.51438	3.15101	2.67518	3.73887	1	0	0	0	0	0	0	0	0	0	0	0	0	0	1	0.0714286	0.873229	0.030553	0	1.11349	2.01727	1.89025	0.432876	0.015146	0	0.551978	0.569393	278.7	284.7	285.1	284.1	3.33	27
ILMN_2501692	Cdr2l	Mus musculus cerebellar degeneration-related protein 2-like (Cdr2l), mRNA.	6.60714	20.0389	15.8953	6.57495	10.2912	7.39577	6.73725	5.28829	4.54645	27.5205	10.8181	5.77909	4.88333	20.7146	0	1	1	0	1	0	0	0	0	1	0	0	0	1	5	0.357143	1.62704	0	0	2.74508	4.37212	5.06423	0.372139	0	0	0.627861	0.596372	349.9	353.9	354.1	353.5	4.2	27
ILMN_2728967	Cdyl2	Mus musculus chromodomain protein, Y chromosome-like 2 (Cdyl2), mRNA.	6.60176	4.56854	2.81537	1.81909	4.9021	-2.00541	2.04002	8.68951	3.56508	1.82787	2.19847	2.09077	1.94864	1.78022	1	0	0	0	1	0	0	1	0	0	0	0	0	0	3	0.214286	0	0	0	1.20298	1.20298	1.80361	0	0	0	1	0.499763	282.2	284.2	284.3	284	3	27
ILMN_1217849	Laptm5	Mus musculus lysosomal-associated protein transmembrane 5 (Laptm5), mRNA.	6.58473	22.3061	17.7037	8.57086	4.41545	4.02141	8.11685	10.4467	4.2374	32.2934	11.608	3.10506	8.69328	6.70874	0	1	1	1	0	0	1	1	0	1	1	0	0	0	7	0.5	0.287154	0	0	1.96461	2.25177	4.18075	0.127524	0	0	0.872476	0.648667	322.2	326.2	326.4	325.8	5.46	27
ILMN_2589256	Adap2	Mus musculus ArfGAP with dual PH domains 2 (Adap2), mRNA.	6.5796	7.47738	4.21206	7.28031	2.2877	1.75215	3.71958	3.11795	1.49247	6.48962	14.4115	1.63089	3.17356	2.49073	1	1	0	1	0	0	0	0	0	1	1	0	0	0	5	0.357143	0	0	0.16974	1.06533	1.23507	2.44875	0	0	0.137434	0.862566	0.713337	283.6	287.6	287.8	287.2	5.37	27
ILMN_2597660	Pcdh1	Mus musculus protocadherin 1 (Pcdh1), mRNA.	6.57698	4.98733	4.87727	2.51842	2.62268	6.00796	2.6584	2.40873	-1.02909	21.0931	5.59311	-4.38033	2.94024	4.27317	0	0	0	0	0	0	0	0	0	1	0	0	0	0	1	0.0714286	1.16984	0	0	2.14768	3.31752	2.99615	0.352624	0	0	0.647376	0.466104	330	334	334.1	333.6	2.47	27
ILMN_2720836	Rbm47	Mus musculus RNA binding motif protein 47 (Rbm47), mRNA.	6.57356	29.2088	30.0194	6.92897	4.31452	2.24918	11.0637	6.8348	2.76398	9.25885	10.804	2.52982	5.19131	3.84009	0	1	1	0	0	0	1	0	0	0	1	0	0	0	4	0.285714	0	0	0	2.20502	2.20502	4.03839	0	0	0	1	0.590489	331.3	333.3	333.4	333.1	4.33	27
ILMN_2665490	Litaf	Mus musculus LPS-induced TN factor (Litaf), mRNA.	6.56002	10.2947	9.36416	7.37192	4.16299	2.72145	6.87214	5.03023	2.66663	9.72996	4.70803	1.8628	4.87432	4.66559	1	1	1	1	1	0	1	1	0	1	1	0	0	0	9	0.642857	0.551107	0	0	0.882637	1.43374	2.31921	0.384383	0	0	0.615617	0.716658	258	262	262.2	261.6	7.46	27
ILMN_1259470	Tmem176b	Mus musculus transmembrane protein 176B (Tmem176b), mRNA.	6.54843	5.84175	16.8643	7.51795	3.25036	4.44968	5.62167	5.46549	4.61977	11.3985	6.7483	2.88315	3.62639	4.97335	1	0	1	1	0	0	1	0	0	1	1	0	0	0	6	0.428571	0.275293	0	0	1.36517	1.64047	2.92904	0.167814	0	0	0.832186	0.651819	292.9	296.9	297	296.4	5.43	27
ILMN_2610744	Myl4	Mus musculus myosin, light polypeptide 4 (Myl4), mRNA.	6.54333	4.29314	3.73582	2.32109	2.20268	1.20253	-1.11803	1.76461	1.9274	-1.55036	-1.22791	1.78126	-1.33311	-1.07769	1	0	0	0	0	0	0	0	0	0	0	0	0	0	1	0.0714286	0	0	0	0.94812	0.94812	1.41161	0	0	0	1	0.496255	262.9	264.9	265	264.7	2.96	27
ILMN_1250550	scl0001259.1_60		6.53596	8.03872	3.426	3.65467	4.93456	2.29012	2.39981	4.26568	1.03726	3.19482	7.26066	2.61209	1.95473	1.30523	1	0	0	0	0	0	0	0	0	0	1	0	0	0	2	0.142857	0.124945	0	0	1.45111	1.57605	2.31992	0.079277	0	0	0.920723	0.531846	297.6	301.6	301.7	301.2	3.16	27
ILMN_2844996	Actn1	Mus musculus actinin, alpha 1 (Actn1), mRNA.	6.53268	9.39635	6.97201	6.14605	3.0072	2.3233	5.47121	4.45608	3.66972	9.30862	4.982	2.95399	3.97788	5.02225	1	1	1	1	0	0	1	0	0	1	1	0	0	0	7	0.5	0	0	0	0.991117	0.991117	2.24762	0	0	0	1	0.669279	266.5	268.5	268.6	268.3	6.07	27
ILMN_1219820	1200002N14Rik	Mus musculus RIKEN cDNA 1200002N14 gene (1200002N14Rik), mRNA.	6.52295	5.72867	21.7607	2.97354	3.99712	1.84577	5.06647	4.83847	3.11736	14.5109	6.72566	2.27151	4.40263	3.07953	0	0	1	0	0	0	0	0	0	1	0	0	0	0	2	0.142857	0.189756	0	0	1.63182	1.82158	2.87654	0.104171	0	0	0.895829	0.575656	307.2	311.2	311.3	310.7	3.97	27
ILMN_2873131	Trp53i11	Mus musculus transformation related protein 53 inducible protein 11 (Trp53i11), mRNA.	6.51369	5.84661	2.53643	8.08496	3.02581	11.1885	2.85906	4.38158	4.69652	8.83298	3.36493	6.3674	2.4344	3.53132	0	0	0	1	0	1	0	0	0	0	0	0	0	0	2	0.142857	0	0.063339	0.031636	1.6404	1.73537	2.98745	0	0.036499	0.01823	0.945271	0.604233	311.1	317.1	317.4	316.5	4.09	27
ILMN_1254191	Lip1		6.51256	6.70715	15.1097	10.7409	7.04666	3.85679	6.53243	9.82461	4.40016	19.8312	9.79096	2.99436	6.72096	5.90342	1	0	1	1	1	0	1	1	0	1	1	0	0	0	8	0.571429	0.192803	0	0	1.41723	1.61003	3.41413	0.119751	0	0	0.880249	0.689596	295.8	299.8	299.9	299.4	6.58	27
ILMN_1256645	Zfpn1a1		6.49779	13.8967	46.2498	8.01876	2.81364	-1.06916	5.38095	7.26594	2.68423	28.5015	6.49611	1.86641	3.83449	6.61805	0	0	1	0	0	0	0	0	0	1	0	0	0	0	2	0.142857	0	0	0.125406	2.733	2.85841	4.60153	0	0	0.043872	0.956128	0.573302	352.2	356.2	356.4	355.8	3.55	27
ILMN_2985497	Naip2	Mus musculus NLR family, apoptosis inhibitory protein 2 (Naip2), mRNA.	6.49374	5.73516	11.2734	4.90142	5.0551	3.2853	3.69368	2.0926	2.96845	6.6841	12.8082	2.53203	4.95196	5.66123	0	0	1	0	0	0	0	0	0	0	1	0	0	0	2	0.142857	1.35673	0	0	1.54633	2.90305	3.02878	0.467345	0	0	0.532655	0.620268	303.7	307.7	307.8	307.3	4.58	27
ILMN_2636403	Axud1	Mus musculus AXIN1 up-regulated 1 (Axud1), mRNA.	6.48329	5.62167	19.0039	2.15015	2.96173	1.21693	5.7551	3.17862	3.13765	7.45117	4.78046	-1.73283	4.67317	4.52273	1	0	1	0	0	0	1	0	0	1	0	0	0	0	4	0.285714	0.818512	0	0.299908	1.10693	2.22535	2.54617	0.367813	0	0.134769	0.497418	0.733141	293.9	299.9	300.2	299.2	5.07	27
ILMN_2649550	Ccdc85b	Mus musculus coiled-coil domain containing 85B (Ccdc85b), mRNA.	6.46758	5.01923	4.09482	2.74005	5.02527	1.27308	3.86455	1.23763	2.56183	2.20906	2.75762	1.1693	2.07029	3.55802	1	0	0	0	1	0	0	0	0	0	0	0	0	0	2	0.142857	0	0	0.082701	1.22049	1.30319	1.83095	0	0	0.063461	0.936539	0.529965	288.5	292.5	292.7	292.1	2.74	27
ILMN_2827646	Tmem98	Mus musculus transmembrane protein 98 (Tmem98), mRNA.	6.46153	10.1577	2.03782	1.77798	4.63671	3.18761	7.45671	7.04488	4.25791	13.2832	9.89312	4.19195	7.46306	2.4401	0	1	0	0	0	0	1	0	0	1	1	0	0	0	4	0.285714	5.33564	0.069331	0	1.67443	7.0794	3.10655	0.753685	0.009793	0	0.236521	0.609121	313.5	319.5	319.8	318.9	4.21	27
ILMN_3097868	Casp8	Mus musculus caspase 8 (Casp8), transcript variant 2, mRNA.	6.45302	3.27554	7.55405	5.0395	4.30228	2.39579	6.42635	6.28778	1.95451	5.09895	5.82214	2.23946	4.01992	9.27979	1	0	1	0	0	0	1	1	0	0	0	0	0	1	5	0.357143	0	0	0	1.39125	1.39125	2.67223	0	0	0	1	0.609527	294	296	296	295.8	4.68	27
ILMN_1218291	LOC100048330	PREDICTED: Mus musculus hypothetical protein LOC100048330 (LOC100048330), mRNA.	6.4452	3.40408	3.2431	5.88556	6.17791	2.46694	3.16714	2.99535	4.14219	4.59235	3.7927	-1.01873	2.85898	2.76357	1	0	0	1	1	0	0	0	0	0	0	0	0	0	3	0.214286	1.07376	0	0	1.24527	2.31902	2.06583	0.463021	0	0	0.536979	0.551635	286.1	290.1	290.3	289.7	3.39	27
ILMN_2892507	Fut4	Mus musculus fucosyltransferase 4 (Fut4), mRNA.	6.4423	2.7902	3.74723	1.1789	2.38624	1.60603	1.9253	1.72115	1.59984	4.34393	2.78364	1.41833	2.89494	3.79744	1	0	0	0	0	0	0	0	0	0	0	0	0	0	1	0.0714286	0	0	0.166631	1.39638	1.56301	1.77928	0	0	0.106609	0.893391	0.468326	303	307	307.1	306.6	1.68	27
ILMN_2883666	Pign	Mus musculus phosphatidylinositol glycan anchor biosynthesis, class N (Pign), mRNA.	6.43872	11.168	8.38232	11.8118	5.06394	1.40634	3.25072	2.86801	2.97501	7.45702	3.62021	2.26763	8.2848	5.95754	0	0	0	1	0	0	0	0	0	0	0	0	0	0	1	0.0714286	0	0	0	2.03402	2.03402	3.23618	0	0	0	1	0.528606	324.8	326.8	326.8	326.6	3.36	27
ILMN_2768992	Hs1bp3	Mus musculus HCLS1 binding protein 3 (Hs1bp3), mRNA.	6.41945	2.20091	2.42213	1.97241	-1.58035	1.50728	1.10044	2.11404	1.6769	-1.01804	-1.20366	1.12731	1.59427	1.08822	1	0	0	0	0	0	0	0	0	0	0	0	0	0	1	0.0714286	0	0	0	0.926687	0.926687	1.21747	0	0	0	1	0.429131	261.1	263.1	263.1	262.9	2.26	27
ILMN_2750047	Csf2rb2	Mus musculus colony stimulating factor 2 receptor, beta 2, low-affinity (granulocyte-macrophage) (Csf2rb2), mRNA.	6.40412	7.36048	10.738	4.13842	2.31771	1.22438	5.32403	1.72375	4.57652	11.1724	12.455	2.71702	9.20957	5.6952	0	0	1	0	0	0	0	0	0	0	1	0	0	0	2	0.142857	0.072313	0	0.052017	2.2964	2.42073	3.43941	0.029872	0	0.021488	0.948639	0.510497	336.5	342.5	342.8	341.8	2.9	27
ILMN_1223416	Fer1l3	PREDICTED: Mus musculus fer-1-like 3, myoferlin (C. elegans), transcript variant 1 (Fer1l3), mRNA.	6.39713	12.4623	14.9503	41.9099	6.35609	6.58827	14.015	14.7946	3.91147	39.9134	8.98831	6.4731	9.49017	12.9299	0	1	1	1	0	0	1	1	0	1	1	0	0	1	8	0.571429	1.83348	0	0	1.93634	3.76982	5.24671	0.486357	0	0	0.513643	0.725559	321.9	325.9	326.1	325.5	7.57	27
ILMN_3155245	Arhgap25	Mus musculus Rho GTPase activating protein 25 (Arhgap25), transcript variant 2, mRNA. XM_899325 XM_899332 XM_899339 XM_899344 XM_914946 XM_923470 XM_923471 XM_923481 XM_923488 XM_923492 XM_923496 XM_923499 XM_923504	6.38816	22.5392	11.7997	11.7262	4.62022	6.60256	7.72546	12.1951	3.44295	29.9953	16.7382	1.99167	15.3199	3.83159	0	1	1	1	0	0	0	1	0	1	1	0	0	0	6	0.428571	0	0	0.098609	2.47708	2.57568	4.82562	0	0	0.038285	0.961715	0.629228	343.8	347.8	348	347.4	4.64	27
ILMN_2856157	Pgam1	Mus musculus phosphoglycerate mutase 1 (Pgam1), mRNA.	6.38041	6.70204	10.9166	6.27006	6.73378	4.08341	11.8874	5.88779	3.51819	7.10795	3.06301	2.59191	8.13363	3.01025	1	1	1	1	1	1	1	1	1	1	0	0	1	0	11	0.785714	0.237844	0.063946	0.049226	0.584689	0.935705	2.41672	0.254187	0.06834	0.052608	0.624865	0.838103	232.3	240.3	240.8	239.5	12.5	27
ILMN_1238346	Tmem106a	Mus musculus transmembrane protein 106A (Tmem106a), mRNA.	6.37069	18.7957	18.639	10.5281	7.22351	2.53925	7.99823	8.66155	4.26572	23.8972	7.45586	2.42933	7.59965	6.60774	0	1	1	1	1	0	1	0	0	1	0	0	0	0	6	0.428571	2.42906	0	0.327524	2.02516	4.78175	4.54578	0.507986	0	0.068495	0.42352	0.709093	336.9	342.9	343.2	342.3	5.09	27
ILMN_2933887	1200013B08Rik	Mus musculus RIKEN cDNA 1200013B08 gene (1200013B08Rik), mRNA.	6.36606	15.8917	26.3093	12.5038	4.5911	2.49057	7.71679	9.37358	3.73472	65.2241	46.7024	1.53902	6.49202	17.0448	0	0	0	0	0	0	0	0	0	1	1	0	0	0	2	0.142857	0	0	0	4.59061	4.59061	6.94271	0	0	0	1	0.50409	390.7	392.7	392.7	392.5	3.05	27
ILMN_1220418	Hcst	Mus musculus hematopoietic cell signal transducer (Hcst), mRNA.	6.3579	24.5327	22.1641	5.51148	3.1585	3.13062	9.89816	8.56216	3.66423	20.4383	15.9557	3.11199	3.06142	5.44921	0	0	1	0	0	0	0	0	0	0	0	0	0	0	1	0.0714286	2.2581	0	0.127783	3.30652	5.6924	5.28974	0.396686	0	0.022448	0.580866	0.55126	368	374	374.4	373.4	3.18	27
ILMN_2670150	Oas2	Mus musculus 2'-5' oligoadenylate synthetase 2 (Oas2), mRNA.	6.35669	5.62297	9.21366	3.32031	6.93387	2.64552	3.49386	5.68683	1.18574	18.6293	12.4319	1.68663	6.16129	4.0134	0	0	0	0	0	0	0	0	0	1	1	0	0	0	2	0.142857	1.01929	0	0	2.1713	3.19058	3.58732	0.319467	0	0	0.680533	0.548977	330.8	334.8	334.9	334.4	3.36	27
ILMN_1224306	E330027P06Rik		6.34744	12.9448	2.23888	2.49068	4.62054	1.30123	1.21082	2.82094	2.70058	9.9659	3.98879	2.09258	1.71325	2.07199	0	1	0	0	0	0	0	0	0	1	0	0	0	0	2	0.142857	0	0	0.028169	1.54926	1.57743	2.28965	0	0	0.017857	0.982143	0.501431	304.2	308.2	308.3	307.7	2.83	27
ILMN_1226839	Hist1h2ad	Mus musculus histone cluster 1, H2ad (Hist1h2ad), mRNA.	6.34348	11.81	21.7731	8.03635	3.9544	3.1746	7.74776	10.5031	2.78737	19.6089	8.85505	3.00515	7.72731	9.87137	0	0	1	1	0	0	1	1	0	1	0	0	0	0	5	0.357143	0.216766	0	0	2.00401	2.22078	4.18023	0.097608	0	0	0.902392	0.641343	323.8	327.8	327.9	327.4	5.16	27
ILMN_1212938	Aif1	Mus musculus allograft inflammatory factor 1 (Aif1), mRNA.	6.33415	36.5162	98.7118	14.7659	7.20611	6.06056	8.44701	12.2139	3.29129	18.6801	18.1173	2.48146	12.3266	5.65342	0	1	1	1	0	0	0	0	0	0	1	0	0	0	4	0.285714	0.265245	0	0	3.35944	3.62468	6.38475	0.073177	0	0	0.926823	0.606134	365.6	369.6	369.7	369.2	4.53	27
ILMN_3117876	Chi3l3	Mus musculus chitinase 3-like 3 (Chi3l3), mRNA.	6.29541	4.85869	6.99464	5.0516	2.16292	1.53379	3.84952	-1.18826	2.22072	1.36097	-1.36748	2.75518	2.65486	-1.1288	1	0	1	1	0	0	0	0	0	0	0	0	0	0	3	0.214286	0.306088	0	0.19417	1.2878	1.78806	2.0349	0.171185	0	0.108593	0.720223	0.581999	298.8	304.8	305.1	304.2	2.59	27
ILMN_2666582	Ninj1		6.27885	2.75681	4.67098	4.4469	2.90054	-1.62434	3.32262	1.8797	2.25697	-1.10977	2.11484	-1.02868	2.13732	2.75029	1	0	0	0	0	0	0	0	0	0	0	0	0	0	1	0.0714286	0	0	0	1.18832	1.18832	1.7428	0	0	0	1	0.488617	281.2	283.2	283.3	283	2.87	27
ILMN_1252076	Lyz2	Mus musculus lysozyme 2 (Lyz2), mRNA.	6.26896	8.44677	28.8225	13.9971	16.7783	4.15767	13.3675	16.2966	2.21515	14.5923	4.67632	4.24289	7.05184	4.15594	1	1	1	1	1	0	1	1	0	1	0	0	0	0	8	0.571429	2.82619	0	0.5506	1.21855	4.59534	4.73505	0.615013	0	0.119817	0.26517	0.854971	307.3	313.3	313.7	312.7	9.55	27
ILMN_1223539	Tpm4	Mus musculus tropomyosin 4 (Tpm4), mRNA.	6.25929	9.83801	8.09777	6.80559	5.14346	3.2894	16.695	2.51485	1.35072	6.06511	1.58288	4.25928	3.99289	4.56031	0	0	0	0	0	0	1	0	0	0	0	0	0	0	1	0.0714286	0	0.00135	0	2.2915	2.29285	3.64426	0	0.000589	0	0.999411	0.528677	334.5	338.5	338.6	338	3.36	27
ILMN_1247811	Ass1	Mus musculus argininosuccinate synthetase 1 (Ass1), mRNA.	6.25658	5.75334	9.07596	3.25428	3.00599	1.85318	4.73321	8.98473	4.40793	4.3305	2.5653	1.5786	3.96522	4.15916	1	1	1	0	0	0	1	1	1	0	0	0	0	0	6	0.428571	0.57452	0	0	0.912821	1.48734	2.04723	0.386273	0	0	0.613727	0.668046	260.8	264.8	264.9	264.4	5.65	27
ILMN_2959372	Clec4b1	Mus musculus C-type lectin domain family 4, member b1 (Clec4b1), mRNA.	6.25561	10.6854	57.0864	70.8924	6.63594	14.9684	17.2784	5.67344	2.25551	66.9216	18.9605	2.61641	19.8771	14.7185	0	0	1	1	0	1	1	0	0	1	1	0	0	0	6	0.428571	0.619834	0	0	3.03869	3.65852	6.91304	0.169422	0	0	0.830578	0.671644	357.7	361.7	361.8	361.2	5.98	27
ILMN_1257313	Nab1		6.25463	5.04097	3.99827	3.13243	4.27795	2.06144	2.85126	2.08526	4.326	10.438	5.57694	1.94239	3.66776	4.01811	0	0	0	0	0	0	0	0	0	1	0	0	0	0	1	0.0714286	0	0	0	1.52382	1.52382	2.39631	0	0	0	1	0.523073	301.4	303.4	303.4	303.2	3.29	27
ILMN_2507232	Gas2l3	Mus musculus growth arrest-specific 2 like 3 (Gas2l3), transcript variant 2, mRNA.	6.24467	2.7931	2.83835	14.3057	3.64334	3.43551	6.92359	5.8456	2.545	5.24897	3.84251	1.94559	5.46808	3.25606	0	0	0	1	0	0	1	0	0	0	0	0	0	0	2	0.142857	0	0	0.19439	1.60427	1.79866	2.98866	0	0	0.108075	0.891925	0.636837	314.3	318.3	318.5	317.9	3.92	27
ILMN_2659151	Thbs1	Mus musculus thrombospondin 1 (Thbs1), mRNA.	6.23559	4.23913	2.56894	1.03684	2.79216	1.93073	4.49437	3.35433	4.6373	3.5027	2.08349	1.18596	1.78027	1.70704	1	0	0	0	0	0	0	0	0	0	0	0	0	0	1	0.0714286	0.056726	0	0	1.39492	1.45165	1.91431	0.039077	0	0	0.960923	0.454075	294.3	298.3	298.5	297.9	2.4	27
ILMN_2866189	Btg1	Mus musculus B-cell translocation gene 1, anti-proliferative (Btg1), mRNA.	6.20863	5.13228	9.20632	3.46083	2.73333	1.68159	4.47802	3.11995	2.35395	7.01463	4.40151	2.24098	3.86366	4.71582	1	0	1	0	0	0	1	0	0	1	0	0	0	0	4	0.285714	0.103301	0	0	0.9963	1.0996	1.89171	0.093944	0	0	0.906056	0.605951	267.2	271.2	271.3	270.8	4.49	27
ILMN_2836654	Hist1h2ao	Mus musculus histone cluster 1, H2ao (Hist1h2ao), mRNA.	6.20777	12.0397	21.3298	8.92926	3.83424	3.23032	8.5444	11.8826	2.66159	21.4583	8.89041	2.8229	8.78962	10.1653	0	0	1	1	0	0	1	1	0	1	0	0	0	0	5	0.357143	0.023754	0	0	2.08027	2.10402	4.32333	0.01129	0	0	0.98871	0.639236	326.6	330.6	330.8	330.2	5.27	27
ILMN_1248608	Shroom2	Mus musculus shroom family member 2 (Shroom2), mRNA.	6.19047	5.21187	2.47847	9.36293	2.98101	4.39412	2.30157	1.75458	6.44732	3.83803	3.19823	5.71968	4.20003	3.06414	0	0	0	1	0	0	0	0	0	0	0	0	0	0	1	0.0714286	0	0	0	2.33629	2.33629	3.29282	0	0	0	1	0.467867	336	338	338	337.8	2.64	27
ILMN_2686975	Fam129b	Mus musculus family with sequence similarity 129, member B (Fam129b), mRNA.	6.18758	14.442	11.7731	12.463	4.90958	3.98969	9.3158	6.52668	4.20088	13.9459	6.36275	2.34069	7.79185	7.01321	1	1	1	1	1	0	1	1	0	1	1	0	1	1	11	0.785714	0.038265	0	0	1.15218	1.19044	3.10612	0.032144	0	0	0.967856	0.722043	278.8	282.8	283	282.4	7.75	27
ILMN_2630749	Aldh1a2	Mus musculus aldehyde dehydrogenase family 1, subfamily A2 (Aldh1a2), mRNA.	6.18179	8.09838	8.00388	3.93128	-1.45645	3.10496	3.91839	1.65204	1.21102	6.02419	1.56583	-1.56486	1.46405	1.42123	1	1	1	0	0	0	0	0	0	0	0	0	0	0	3	0.214286	0	0	0.316847	1.1088	1.42565	2.25897	0	0	0.222247	0.777753	0.699358	294	298	298.2	297.6	3.77	27
ILMN_2677065	4930519N13Rik	Mus musculus RIKEN cDNA 4930519N13 gene (4930519N13Rik), mRNA.	6.17237	4.77985	5.96119	2.67626	2.21201	1.31289	4.34682	1.82115	5.50927	11.0346	2.99048	-1.33843	5.15927	2.46133	1	0	1	0	0	0	0	0	1	1	0	0	0	0	4	0.285714	1.36023	0	0.141723	1.3375	2.83946	2.28344	0.479046	0	0.049912	0.471042	0.602263	299.7	305.7	306	305.1	3.06	27
ILMN_1238374	Cdc7	Mus musculus cell division cycle 7 (S. cerevisiae) (Cdc7), mRNA.	6.16297	6.8954	12.7927	6.877	5.1581	2.70687	3.88248	2.89718	3.48267	21.8425	7.38245	2.96103	3.70627	6.04804	0	0	0	0	0	0	0	0	0	1	0	0	0	0	1	0.0714286	0	0	0	2.94285	2.94285	4.07127	0	0	0	1	0.457874	354.7	356.7	356.7	356.5	2.53	27
ILMN_2702303	Ch25h	Mus musculus cholesterol 25-hydroxylase (Ch25h), mRNA.	6.16265	20.9547	17.6015	4.18498	9.11145	-1.23401	3.00291	2.38721	3.73431	22.707	3.97058	-1.11174	1.63592	3.70398	0	1	1	0	1	0	0	0	0	1	0	0	0	0	4	0.285714	0	0	0	2.27852	2.27852	3.7154	0	0	0	1	0.540052	334	336	336	335.7	3.52	27
ILMN_2654495	Iqgap1		6.1619	10.208	12.8884	8.10033	4.01378	2.98302	7.07387	6.42368	3.90812	14.5919	8.82288	2.46146	7.30862	5.68663	1	1	1	1	0	0	1	1	0	1	1	0	1	1	10	0.714286	0.026251	0	0	1.08701	1.11326	2.83046	0.02358	0	0	0.97642	0.712161	274.1	278.1	278.2	277.6	7.4	27
ILMN_2756678	LOC676389	PREDICTED: Mus musculus similar to Baculoviral IAP repeat-containing protein 1e (Neuronal apoptosis inhibitory protein 5) (LOC676389), misc RNA.	6.15646	7.02225	20.8016	13.7028	4.57078	2.6891	7.17471	3.69366	4.00378	21.5229	7.75042	1.91971	4.52066	6.55105	0	0	1	1	0	0	0	0	0	1	0	0	0	0	3	0.214286	0	0	0.148463	2.05628	2.20474	3.98527	0	0	0.067338	0.932662	0.637502	331.1	335.1	335.3	334.7	4.45	27
ILMN_2952661	Dbf4	Mus musculus DBF4 homolog (S. cerevisiae) (Dbf4), mRNA.	6.15155	13.9478	11.3614	18.4269	1.42474	2.24906	11.4594	8.39919	4.72181	15.5826	3.91639	3.41689	15.657	6.67758	0	1	1	1	0	0	1	1	0	1	0	0	1	0	7	0.5	0	0	0	1.86644	1.86644	3.95834	0	0	0	1	0.646359	317.8	319.8	319.8	319.6	5.48	27
ILMN_1215791	Alox5ap		6.14953	10.2395	22.6553	12.5459	5.38125	4.11139	13.4443	14.2158	2.39085	20.1942	5.78193	3.0758	8.53347	5.61905	0	0	1	1	0	0	1	1	0	1	0	0	0	0	5	0.357143	1.34209	0	0	1.77286	3.11495	4.29445	0.430854	0	0	0.569146	0.692821	314.6	318.6	318.8	318.2	6.31	27
ILMN_2603689	Fmnl1	Mus musculus formin-like 1 (Fmnl1), transcript variant 1, mRNA.	6.14878	14.3714	7.66162	3.06422	3.48259	2.74247	7.88986	4.21476	6.14946	20.6609	7.70636	4.10822	5.92316	2.50889	0	1	0	0	0	0	1	0	0	1	0	0	0	0	3	0.214286	0.65265	0	0	1.92423	2.57688	3.27917	0.253272	0	0	0.746728	0.562298	320.9	324.9	325	324.4	3.69	27
ILMN_1233857	Mcm6	Mus musculus minichromosome maintenance deficient 6 (MIS5 homolog, S. pombe) (S. cerevisiae) (Mcm6), mRNA.	6.14771	7.10335	8.43522	8.37321	3.20503	3.40434	9.69002	2.25875	2.01477	4.57911	8.76133	2.30511	3.4103	6.82214	0	0	0	1	0	0	1	0	0	0	0	0	0	0	2	0.142857	0.288988	0	0	2.26249	2.55147	3.4618	0.113263	0	0	0.886737	0.511222	333.6	337.6	337.8	337.2	3	27
ILMN_1239208	Rgs3	Mus musculus regulator of G-protein signaling 3 (Rgs3), transcript variant 2, mRNA.	6.14186	9.86259	7.15636	5.34696	8.1561	1.76498	4.92608	6.17408	3.29415	8.87041	4.69516	2.59543	3.24586	3.5502	0	0	0	0	1	0	0	0	0	0	0	0	0	0	1	0.0714286	0.012581	0	0	2.06914	2.08172	3.204	0.006044	0	0	0.993956	0.515735	326.2	330.2	330.3	329.7	3.18	27
ILMN_2806700	Cyba	Mus musculus cytochrome b-245, alpha polypeptide (Cyba), mRNA.	6.1325	6.33846	16.6255	8.0456	4.58582	3.80501	9.81181	10.9619	3.56676	21.181	9.0117	4.07286	7.17477	7.21946	0	0	1	1	0	0	1	1	0	1	1	0	0	0	6	0.428571	0.300182	0	0	1.50411	1.80429	3.6969	0.166371	0	0	0.833629	0.696055	300.7	304.7	304.9	304.3	6.5	27
ILMN_1234796	Hsd17b12		6.12751	5.35629	3.32597	1.73126	2.97713	-2.13458	3.1617	1.93841	2.54067	6.35694	5.72073	1.63822	2.48756	1.19197	1	0	0	0	0	0	0	0	0	0	0	0	0	0	1	0.0714286	0	0	0	1.36363	1.36363	2.03689	0	0	0	1	0.4979	292.4	294.4	294.4	294.2	2.97	27
ILMN_1238119	Itgav	Mus musculus integrin alpha V (Itgav), mRNA.	6.12485	5.96822	4.79149	4.82791	2.21585	2.35414	6.72708	1.87794	-1.02314	5.14344	2.81128	-1.3834	4.35981	1.09385	0	0	0	0	0	0	1	0	0	0	0	0	0	0	1	0.0714286	0	0	0	1.82763	1.82763	2.43206	0	0	0	1	0.436393	316.1	318.1	318.1	317.9	2.32	27
ILMN_1222489	Sulf1	Mus musculus sulfatase 1 (Sulf1), mRNA.	6.12262	6.05755	8.49021	4.76105	2.46048	2.39156	5.7064	2.40644	3.23656	10.2361	3.57006	2.45496	3.79877	5.29688	1	1	1	1	0	0	1	0	0	1	0	0	0	1	7	0.5	0	0	0	0.839	0.839	1.91855	0	0	0	1	0.672018	253	255	255.1	254.8	6.15	27
ILMN_1229763	Dmkn	Mus musculus dermokine (Dmkn), transcript variant 2, mRNA.	6.12177	10.4411	51.1053	7.89008	18.2497	2.92594	9.25184	14.2235	2.05665	40.2691	4.998	-2.14419	14.666	8.82111	0	0	1	0	1	0	0	0	0	1	0	0	0	0	3	0.214286	0	0	1.12215	3.13743	4.25958	7.08528	0	0	0.263441	0.736559	0.737825	381.8	385.8	386	385.4	4.47	27
ILMN_2645793	Aldh3b1	Mus musculus aldehyde dehydrogenase 3 family, member B1 (Aldh3b1), mRNA.	6.12167	6.02864	11.9375	12.8168	3.91746	3.91124	7.53225	7.43651	2.38857	16.6533	5.99475	2.20659	4.8795	4.12414	0	0	1	1	0	0	1	1	0	1	0	0	0	0	5	0.357143	0	0	0	1.49166	1.49166	3.07299	0	0	0	1	0.635943	299.6	301.6	301.7	301.4	5.24	27
ILMN_2995794	Itprip	Mus musculus inositol 1,4,5-triphosphate receptor interacting protein (Itprip), mRNA.	6.10927	19.0934	9.89689	6.16329	5.54835	2.46994	6.93762	8.18921	10.4108	14.4707	5.77792	3.56252	3.99363	5.70618	0	1	1	0	0	0	0	0	1	1	0	0	0	0	4	0.285714	0.171007	0	0	2.02283	2.19384	3.72557	0.077949	0	0	0.922051	0.593611	324.5	328.5	328.6	328.1	4.25	27
ILMN_1252481	Fosl2	Mus musculus fos-like antigen 2 (Fosl2), mRNA.	6.10599	11.0604	6.14282	5.53691	2.51567	2.27947	4.29024	2.54727	2.73769	5.33936	3.4373	1.60483	3.89422	2.87753	1	1	1	1	0	0	1	0	0	1	0	0	0	0	6	0.428571	0	0	0	0.645186	0.645186	1.63584	0	0	0	1	0.704195	231.8	233.8	233.8	233.5	7.14	27
ILMN_2757582	Ltbr	Mus musculus lymphotoxin B receptor (Ltbr), mRNA.	6.0988	-1.01649	4.23731	1.91489	2.97552	2.10617	3.27347	1.64467	2.91681	4.96904	8.14139	-1.01721	2.46964	2.22974	1	0	0	0	0	0	0	0	0	0	1	0	0	0	2	0.142857	3.94049	0.007397	0	1.18202	5.1299	1.96579	0.768141	0.001442	0	0.230417	0.556416	283.4	289.4	289.7	288.8	3.09	27
ILMN_2543655	1810020C02Rik		6.09605	7.20917	4.68711	5.13349	4.43834	4.70591	9.71019	2.77531	4.63431	9.75111	7.05477	2.96319	1.87263	3.87038	0	0	0	0	0	0	1	0	0	1	1	0	0	0	3	0.214286	0.465372	0	0	1.4909	1.95627	2.73451	0.237887	0	0	0.762113	0.593214	300.1	304.1	304.3	303.7	4.24	27
ILMN_1215969	Rcor1	Mus musculus REST corepressor 1 (Rcor1), mRNA.	6.09531	7.28469	1.27326	3.0887	2.88306	1.74119	2.28083	2.96355	4.72864	4.25787	8.57761	-1.24047	6.10842	3.31263	0	0	0	0	0	0	0	0	0	0	1	0	0	0	1	0.0714286	0.441073	0	0	1.67662	2.1177	2.46517	0.20828	0	0	0.79172	0.492305	309.6	313.6	313.7	313.2	2.5	27
ILMN_1222039	Dhx58	Mus musculus DEXH (Asp-Glu-X-His) box polypeptide 58 (Dhx58), mRNA.	6.08982	8.6554	25.3968	8.89861	10.9766	2.55279	7.2141	12.7768	4.0468	9.6757	9.20872	1.02732	5.7848	6.06115	0	0	1	0	1	0	0	1	0	0	0	0	0	0	3	0.214286	0.325891	0	0.030354	2.55835	2.9146	4.40427	0.111814	0	0.010414	0.877772	0.570577	344.5	350.5	350.9	349.9	3.8	27
ILMN_3142803	Cxcl10	Mus musculus chemokine (C-X-C motif) ligand 10 (Cxcl10), mRNA.	6.08761	6.57474	11.0485	5.67775	2.28666	1.35111	10.4151	2.84268	5.00562	4.44372	1.97681	1.48816	2.14617	2.06363	0	0	1	0	0	0	1	0	0	0	0	0	0	0	2	0.142857	0	0	0	2.37951	2.37951	3.25548	0	0	0	1	0.451805	337.5	339.5	339.5	339.3	2.47	27
ILMN_2641229	Cd109	Mus musculus CD109 antigen (Cd109), mRNA.	6.08634	4.85734	3.52342	4.36808	6.77434	3.29168	6.23237	3.36463	2.23691	4.23423	3.7803	1.47951	3.96659	6.0179	0	0	0	0	1	0	0	0	0	0	0	0	0	0	1	0.0714286	0	0	0.068459	1.90605	1.97451	2.85088	0	0	0.034672	0.965328	0.515388	322.3	326.3	326.5	325.9	2.84	27
ILMN_1214706	C430014G13Rik		6.0855	4.54034	1.86361	2.28244	3.9005	1.28023	2.00475	6.42936	1.9364	10.0756	8.03654	1.6138	3.57266	1.3803	1	0	0	0	0	0	0	1	0	1	1	0	0	0	4	0.285714	0.086986	0	0.264755	0.994095	1.34584	2.15354	0.064633	0	0.196722	0.738645	0.714771	284.3	290.3	290.6	289.6	4.29	27
ILMN_1237948	Tes	Mus musculus testis derived transcript (Tes), transcript variant 1, mRNA.	6.08465	8.16829	8.79769	7.69958	3.45935	-1.28744	5.42416	-1.18795	2.35996	2.6805	-1.3667	-1.16042	3.72343	1.17921	0	0	1	1	0	0	0	0	0	0	0	0	0	0	2	0.142857	0	0	0	1.77768	1.77768	2.59302	0	0	0	1	0.485829	313.9	315.9	315.9	315.6	2.83	27
ILMN_1227758	Arhgap27	Mus musculus Rho GTPase activating protein 27 (Arhgap27), transcript variant 1, mRNA.	6.07507	4.20858	3.26725	4.97129	2.99252	2.85146	7.65891	1.65551	-1.09738	14.2198	3.26396	4.55231	1.83507	3.18352	0	0	0	0	0	0	1	0	0	1	0	0	0	0	2	0.142857	0	0	0	2.00045	2.00045	2.78521	0	0	0	1	0.46132	323.4	325.4	325.5	325.2	2.57	27
ILMN_2621862	Pdlim5	Mus musculus PDZ and LIM domain 5 (Pdlim5), transcript variant 1, mRNA.	6.06612	7.72196	6.36639	6.50171	1.40215	2.99945	5.66894	2.58959	6.71762	7.76813	5.71419	3.3252	5.12908	2.15027	0	0	0	1	0	0	0	0	1	0	0	0	0	0	2	0.142857	0.028727	0	0	1.58129	1.61002	2.84798	0.017843	0	0	0.982157	0.583785	304.4	308.4	308.6	308	4.1	27
ILMN_2615513	Frk	Mus musculus fyn-related kinase (Frk), mRNA.	6.0656	7.36575	3.99107	9.21152	3.07622	1.8341	2.25671	3.38769	4.61341	7.03589	7.09265	1.66048	4.87443	6.94544	0	0	0	1	0	0	0	0	0	0	0	0	0	0	1	0.0714286	0	0	0	1.7093	1.7093	2.70474	0	0	0	1	0.526026	310.7	312.7	312.7	312.5	3.33	27
ILMN_2936671	Skap2	Mus musculus src family associated phosphoprotein 2 (Skap2), mRNA.	6.06413	6.02085	14.0155	5.61264	4.08779	2.48475	5.60083	4.08759	2.65422	9.51739	6.75439	2.35681	5.08636	2.93837	1	1	1	1	1	0	1	0	0	1	1	0	0	0	8	0.571429	0.077406	0	0	0.848498	0.925904	2.18024	0.0836	0	0	0.9164	0.708751	254.1	258.1	258.3	257.7	7.19	27
ILMN_1257327	Rod1	Mus musculus ROD1 regulator of differentiation 1 (S. pombe) (Rod1), transcript variant 1, mRNA.	6.06413	6.13317	12.2614	5.05055	2.86875	1.85375	3.93832	1.42677	2.94279	9.09979	5.64285	1.92253	7.49277	4.9507	0	0	1	0	0	0	0	0	0	1	0	0	0	0	2	0.142857	0.418978	0	0.179527	1.4815	2.08	2.83737	0.201432	0	0.086311	0.712257	0.648136	308.3	314.3	314.6	313.7	3.98	27
ILMN_2482572	Flnb	Mus musculus filamin, beta (Flnb), mRNA. XM_904364 XM_990154	6.04943	19.7804	11.9741	23.9684	2.50988	2.88916	6.31219	4.13898	4.01766	11.1838	4.2662	5.04127	5.03015	4.60174	1	1	1	1	0	0	1	0	0	1	0	0	0	0	6	0.428571	0	0.002448	0.075342	1.33915	1.41694	3.36947	0	0.001727	0.053172	0.9451	0.717456	295.4	301.4	301.7	300.7	6.77	27
ILMN_2668509	Hp	Mus musculus haptoglobin (Hp), mRNA.	6.04901	5.84593	35.7798	3.18811	2.7421	1.97568	18.0988	15.1563	3.11555	11.2042	7.77302	1.26964	9.8008	2.505	0	0	1	0	0	0	1	1	0	0	0	0	0	0	3	0.214286	0	0	0.029151	2.36441	2.39356	4.1652	0	0	0.012179	0.987821	0.579381	337.9	341.9	342.1	341.5	4	27
ILMN_2795491	Zmynd15	Mus musculus zinc finger, MYND-type containing 15 (Zmynd15), mRNA.	6.04608	2.5741	8.92839	1.20567	1.87117	1.2348	2.18734	1.21188	2.33909	4.94544	3.90562	2.01133	2.44489	4.4351	0	0	1	0	0	0	0	0	0	0	0	0	0	0	1	0.0714286	0	0	0	1.68751	1.68751	2.02065	0	0	0	1	0.37365	309.6	311.6	311.7	311.4	1.79	27
ILMN_1231164	Zfp810	Mus musculus zinc finger protein 810 (Zfp810), mRNA.	6.03833	4.02447	3.51988	2.43885	4.29108	-1.76813	2.33037	1.47149	-1.03042	3.04801	1.76703	-1.63758	1.75552	-1.0181	1	0	0	0	1	0	0	0	0	0	0	0	0	0	2	0.142857	0	0	0.108673	1.07939	1.18806	1.57831	0	0	0.091471	0.908529	0.530216	280.9	284.9	285	284.5	2.43	27
ILMN_2684324	Dock11	Mus musculus dedicator of cytokinesis 11 (Dock11), mRNA.	6.02318	9.00026	15.4772	10.9357	5.60083	4.07472	4.95045	5.4688	2.50712	11.3373	7.97025	1.31697	2.60425	3.12529	0	0	1	1	0	0	0	0	0	1	1	0	0	0	4	0.285714	0	0	0.251817	1.70826	1.96008	3.37648	0	0	0.128473	0.871527	0.663959	321.1	325.1	325.3	324.7	4.37	27
ILMN_1259809	Fat1	Mus musculus FAT tumor suppressor homolog 1 (Drosophila) (Fat1), mRNA.	5.99402	3.32081	4.30936	3.38318	4.7746	1.97441	4.36699	1.81142	1.9144	2.95229	2.53134	1.06275	1.76949	-1.00628	1	0	0	0	1	0	1	0	0	0	0	0	0	0	3	0.214286	0	0	0	1.11556	1.11556	1.69156	0	0	0	1	0.505384	276.1	278.1	278.2	277.9	3.07	27
ILMN_2929518	Cchcr1	Mus musculus coiled-coil alpha-helical rod protein 1 (Cchcr1), mRNA.	5.99132	5.78854	11.5641	7.03436	6.37065	2.50095	2.73038	5.21268	3.28101	5.14605	8.08053	-1.65314	4.06898	4.54311	0	0	1	1	0	0	0	0	0	0	0	0	0	0	2	0.142857	0	0	0.005854	1.96486	1.97071	3.04277	0	0	0.002971	0.997029	0.517124	322.2	326.2	326.4	325.8	3.18	27
ILMN_2657728	Stxbp2		5.99039	11.2125	12.2463	7.27385	5.96392	2.44791	4.27765	3.8344	3.555	9.25051	6.94717	2.06921	3.86571	2.85517	0	1	1	1	1	0	0	0	0	1	1	0	0	0	6	0.428571	0	0	0	1.43756	1.43756	2.76938	0	0	0	1	0.610681	296.7	298.7	298.7	298.4	4.71	27
ILMN_2674884	Slc11a1	Mus musculus solute carrier family 11 (proton-coupled divalent metal ion transporters), member 1 (Slc11a1), mRNA.	5.97122	17.9972	11.9571	14.5221	7.19263	3.28285	13.4171	3.34296	1.5491	12.4468	4.77508	4.83472	5.90362	1.6387	0	1	1	1	0	0	1	0	0	0	0	0	0	0	4	0.285714	0	0	0	2.41778	2.41778	4.23995	0	0	0	1	0.572322	338.8	340.8	340.8	340.6	4.01	27
ILMN_1231204	LOC270152		5.96491	19.1889	24.6749	6.34588	3.6097	2.34705	6.01715	10.3227	2.80067	17.4538	8.91849	3.85871	9.46498	5.97623	0	1	1	0	0	0	0	0	0	0	0	0	0	0	2	0.142857	0	0	0.007215	2.59136	2.59857	4.64877	0	0	0.002777	0.997223	0.583086	344.6	348.6	348.8	348.2	4.16	27
ILMN_2789089	Hpcal1	Mus musculus hippocalcin-like 1 (Hpcal1), mRNA.	5.96429	6.29861	16.3521	6.1792	5.46	4.47574	9.7385	4.10434	7.20196	9.76915	7.59763	2.04217	4.85633	6.66879	0	0	1	1	1	0	1	0	1	1	1	0	0	0	7	0.5	0	0	0	1.37106	1.37106	3.14316	0	0	0	1	0.672848	292.8	294.8	294.9	294.6	6.17	27
ILMN_2812645	Ptrh1	Mus musculus peptidyl-tRNA hydrolase 1 homolog (S. cerevisiae) (Ptrh1), mRNA.	5.95757	3.24788	9.45892	4.51724	5.46689	1.11725	6.79569	1.66653	1.83784	4.3348	1.82159	1.6077	2.0494	1.73486	0	0	1	0	0	0	1	0	0	0	0	0	0	0	2	0.142857	3.74334	0	0	1.82878	5.57212	2.6521	0.671798	0	0	0.328202	0.488115	317.9	321.9	322.1	321.5	2.59	27
ILMN_1220115	D130063H01Rik		5.95685	13.7933	6.67191	8.51355	2.85197	2.11866	3.88518	4.61378	3.55563	13.6214	6.59467	2.04796	3.15841	3.46503	1	1	1	1	0	0	0	0	0	1	1	0	0	0	6	0.428571	0.07993	0	0	1.1303	1.21023	2.44711	0.066046	0	0	0.933954	0.654187	277.3	281.3	281.5	280.9	5.52	27
ILMN_2839788	Tal1	Mus musculus T-cell acute lymphocytic leukemia 1 (Tal1), mRNA.	5.93758	2.8232	5.97277	3.20913	2.18486	2.31956	1.71685	1.08655	1.88616	3.55373	1.47972	-1.25293	3.68152	4.58423	1	0	1	0	0	0	0	0	0	0	0	0	0	0	2	0.142857	0	0	0.027566	1.19813	1.22569	1.62745	0	0	0.02249	0.97751	0.460007	283.7	287.7	287.9	287.3	2.35	27
ILMN_1228607	Igk-V5	PREDICTED: Mus musculus immunoglobulin kappa chain variable 5 (V5 family) (Igk-V5), mRNA.	5.93707	14.2979	9.77248	3.96225	1.2221	5.42303	1.65887	17.1306	35.3149	9.54801	9.78333	1.12865	3.79439	4.48884	0	0	0	0	0	0	0	0	1	0	0	0	0	0	1	0.0714286	0	0	0.334347	5.75384	6.08818	7.46512	0	0	0.054917	0.945083	0.452084	413.4	417.4	417.6	417	1.95	27
ILMN_2667164	Card14		5.93059	10.1509	5.27483	1.71171	1.27144	1.11483	1.52368	1.01905	-1.1198	1.03378	-1.01766	2.45002	1.0576	2.00895	1	1	1	0	0	0	0	0	0	0	0	0	0	0	3	0.214286	0.339803	0.062318	0.045421	0.671219	1.11876	1.37305	0.303732	0.055703	0.040599	0.599966	0.667191	244.7	252.7	253.2	251.9	3.05	27
ILMN_2511089	Ugcg		5.92268	8.60773	8.81539	5.30569	2.64279	2.0295	4.75195	3.65754	2.67228	9.20893	4.91605	2.81218	4.69156	5.53091	1	1	1	1	0	0	1	0	0	1	1	0	0	1	8	0.571429	0.013327	0	0	0.963483	0.97681	2.1503	0.013644	0	0	0.986356	0.664077	264.3	268.3	268.4	267.9	5.9	27
ILMN_2711163	Ctsk	Mus musculus cathepsin K (Ctsk), mRNA.	5.91704	6.4016	13.7373	10.8384	4.80468	7.30394	14.1499	10.3643	5.50671	24.3722	5.99434	1.35355	8.13833	7.15297	0	0	1	1	0	0	1	1	0	1	0	0	0	0	5	0.357143	1.42709	0	0	1.66256	3.08965	3.97791	0.461894	0	0	0.538106	0.68912	309.5	313.5	313.7	313.1	6.26	27
ILMN_1244977	H2-DMb1	Mus musculus histocompatibility 2, class II, locus Mb1 (H2-DMb1), mRNA.	5.91089	7.60949	21.6145	4.95553	3.78407	2.25953	7.26056	10.4621	3.21746	14.2126	9.38788	1.33671	5.08401	6.7208	0	0	1	0	0	0	1	1	0	1	1	0	0	0	5	0.357143	1.03021	0	0	1.75412	2.78433	3.40017	0.370004	0	0	0.629996	0.615845	313.6	317.6	317.8	317.2	4.65	27
ILMN_1215329	3230402H02Rik		5.90403	2.06327	1.68731	1.23142	4.22056	-1.55622	1.01971	1.43003	1.07312	2.7384	3.16345	1.23808	1.13474	1.19112	1	0	0	0	1	0	0	0	0	0	1	0	0	0	3	0.214286	0	0	0	0.494065	0.494065	0.891665	0	0	0	1	0.585726	207.8	209.8	209.8	209.6	4.19	27
ILMN_1248028	Emp3	Mus musculus epithelial membrane protein 3 (Emp3), mRNA.	5.90352	9.27277	30.6194	15.1981	13.11	4.10534	21.2369	26.7492	7.05497	53.4123	16.8392	12.4759	16.3573	8.58043	0	0	1	1	1	0	1	1	0	1	1	0	0	0	7	0.5	0	0	0	2.82425	2.82425	6.59137	0	0	0	1	0.678642	351.3	353.3	353.4	353.1	6.34	27
ILMN_2663585	Jdp2	Mus musculus Jun dimerization protein 2 (Jdp2), mRNA.	5.89483	13.2737	5.19843	10.5839	5.01796	2.17633	6.80851	3.98381	1.59781	18.4468	2.20821	1.94653	2.24218	3.38504	0	1	0	1	0	0	1	0	0	1	0	0	0	0	4	0.285714	0	0.129807	0	1.45756	1.58737	2.87732	0	0.081775	0	0.918225	0.63212	301.9	305.9	306	305.5	4.72	27
ILMN_1234413	Adamts12		5.8933	15.2176	10.4273	10.6388	5.17508	6.14835	6.57577	5.75434	4.71716	16.792	8.94434	2.01254	12.3737	8.48119	0	1	1	1	0	0	1	0	0	1	1	0	1	1	8	0.571429	0	0	0	1.60403	1.60403	3.60728	0	0	0	1	0.666502	305.5	307.5	307.6	307.3	6	27
ILMN_2866185	Btg1	Mus musculus B-cell translocation gene 1, anti-proliferative (Btg1), mRNA.	5.89248	6.10264	8.81051	3.83211	2.52157	1.82409	4.7949	3.4734	2.70113	7.62656	5.1257	2.37583	4.60947	4.30528	1	1	1	0	0	0	1	0	0	1	1	0	0	0	6	0.428571	0.008838	0	0	0.988477	0.997315	1.96804	0.008862	0	0	0.991138	0.623397	266.3	270.3	270.5	269.9	4.95	27
ILMN_2918882	Gpnmb	Mus musculus glycoprotein (transmembrane) nmb (Gpnmb), mRNA.	5.88983	2.70688	3.22903	5.93653	3.98329	2.31964	2.63613	6.00088	10.091	11.5274	14.2513	4.67437	1.65187	4.86301	0	0	0	0	0	0	0	0	1	1	1	0	0	0	3	0.214286	0.441272	0	0.165599	1.79494	2.40181	3.44235	0.183725	0	0.068947	0.747328	0.640841	321.9	327.9	328.2	327.3	3.74	27
ILMN_1244211	LOC238943		5.88605	3.55825	3.98775	9.75242	2.94793	2.40911	5.13413	2.87269	2.36698	8.94305	2.07743	1.52012	3.30313	1.97599	1	0	0	1	0	0	1	0	0	1	0	0	0	0	4	0.285714	0	0	0	1.27619	1.27619	2.10351	0	0	0	1	0.544979	287	289	289.1	288.8	3.59	27
ILMN_3143577	Apaf1	Mus musculus apoptotic peptidase activating factor 1 (Apaf1), transcript variant 1, mRNA.	5.87209	37.5368	14.7419	8.14153	3.85738	1.89579	6.8896	6.96754	4.09281	15.687	5.91755	3.92275	7.87547	5.70957	0	1	1	1	0	0	1	0	0	1	0	0	0	0	5	0.357143	0	0	0	1.68622	1.68622	3.62098	0	0	0	1	0.65074	309.6	311.6	311.6	311.4	5.59	27
ILMN_2981363	Emilin2	Mus musculus elastin microfibril interfacer 2 (Emilin2), mRNA.	5.87026	13.2034	18.0456	14.0166	4.32812	4.82607	11.9532	8.80639	3.01532	27.8608	9.41411	4.2188	15.2987	6.14441	0	1	1	1	0	0	1	1	0	1	1	0	1	0	8	0.571429	0	0	0	1.97835	1.97835	4.36635	0	0	0	1	0.660183	322.5	324.5	324.6	324.3	5.83	27
ILMN_1219333	9830134K01Rik		5.86996	4.99009	5.44752	3.33411	3.1947	-1.34516	5.26663	2.05872	4.91885	9.12991	8.92653	2.49998	2.27085	3.06646	0	0	0	0	0	0	0	0	0	0	1	0	0	0	1	0.0714286	0	0	0	1.73059	1.73059	2.67338	0	0	0	1	0.514494	311.7	313.7	313.7	313.5	3.18	27
ILMN_2589107	Runx1	Mus musculus runt related transcription factor 1 (Runx1), mRNA.	5.86935	5.10484	3.42309	3.34452	3.31503	1.21731	6.05279	1.44533	2.39426	4.49026	6.74749	1.69778	3.07922	3.45071	1	0	0	0	0	0	1	0	0	0	1	0	0	0	3	0.214286	0	0	0	1.18112	1.18112	1.87636	0	0	0	1	0.527894	280.7	282.7	282.8	282.5	3.35	27
ILMN_2716876	Frmd8	Mus musculus FERM domain containing 8 (Frmd8), mRNA.	5.86721	3.09191	2.86304	1.62194	2.80827	2.34795	1.54362	-1.24244	1.74445	3.3723	5.63377	-1.22316	1.86456	1.46809	1	0	0	0	0	0	0	0	0	0	1	0	0	0	2	0.142857	0	0	0	1.21261	1.21261	1.54836	0	0	0	1	0.41263	282.9	284.9	284.9	284.7	2.11	27
ILMN_1250409	Tap1	Mus musculus transporter 1, ATP-binding cassette, sub-family B (MDR/TAP) (Tap1), mRNA.	5.85137	15.3688	18.8012	6.56457	5.87684	1.31588	4.96378	6.51109	4.31535	8.97202	11.7758	-2.08175	7.79528	3.23635	0	0	1	0	0	0	0	0	0	0	1	0	0	0	2	0.142857	0.640927	0	0.193292	2.47636	3.31058	4.24422	0.1936	0	0.058386	0.748014	0.593657	347	353	353.3	352.4	3.42	27
ILMN_2671195	St8sia4	Mus musculus ST8 alpha-N-acetyl-neuraminide alpha-2,8-sialyltransferase 4 (St8sia4), mRNA.	5.85056	4.37172	13.0136	11.951	4.70195	4.53523	7.01849	4.32155	2.94441	14.7629	6.11987	4.79091	1.20876	4.22734	0	0	1	1	0	0	0	0	0	1	0	0	0	0	3	0.214286	0	0	0	2.07955	2.07955	3.56728	0	0	0	1	0.562786	326.6	328.6	328.6	328.3	3.86	27
ILMN_1229081	LOC630146	PREDICTED: Mus musculus similar to immunoglobulin superfamily, member 2 (LOC630146), mRNA.	5.83547	-1.86714	3.3707	3.11049	-1.67907	2.06895	2.56035	-1.79197	2.0654	3.0805	2.5993	7.21662	1.76937	1.1432	1	0	0	0	0	0	0	0	0	0	0	0	0	0	1	0.0714286	0.013382	0.008415	0.262717	1.27615	1.56066	1.90191	0.008575	0.005392	0.168337	0.817697	0.57223	301.4	309.4	309.9	308.6	2.09	27
ILMN_2426079	Gpr137b	Mus musculus G protein-coupled receptor 137B (Gpr137b), mRNA.	5.82951	13.9594	34.7924	26.578	6.23496	8.8339	14.7244	9.45384	9.92867	13.9472	11.2916	2.5818	11.9015	6.99626	0	0	1	1	0	0	1	0	1	0	1	0	0	0	5	0.357143	0.228539	0	0	2.43089	2.65943	5.42025	0.085935	0	0	0.914065	0.664385	339.4	343.4	343.6	343	5.87	27
ILMN_1243507	Spsb4	Mus musculus splA/ryanodine receptor domain and SOCS box containing 4 (Spsb4), mRNA.	5.81236	2.94479	2.65034	5.63205	8.04694	7.56361	3.22679	3.26645	3.77636	6.31187	2.41346	-1.10312	6.92381	4.49374	0	0	0	0	1	0	0	0	0	0	0	0	0	0	1	0.0714286	3.79e-18	0	0	2.18317	2.18317	3.20445	1.73e-18	0	0	1	0.48903	330.5	332.5	332.5	332.3	2.87	27
ILMN_1256356	Pml		5.80954	4.51033	2.32737	1.49661	3.80839	1.14932	2.15463	2.17671	4.05698	7.59228	3.26159	3.3228	2.73638	10.5796	0	0	0	0	0	0	0	0	0	0	0	0	0	1	1	0.0714286	0	0	0	1.93413	1.93413	2.50976	0	0	0	1	0.422015	320.7	322.7	322.7	322.5	2.19	27
ILMN_3161805	LOC100048556	PREDICTED: Mus musculus similar to monocyte chemoattractant protein-5, transcript variant 1 (LOC100048556), mRNA.	5.80109	10.3028	22.4326	11.6541	12.0809	2.90035	11.7703	5.79256	6.28634	46.8854	23.3694	3.48075	4.62045	9.11731	0	0	1	0	0	0	0	0	0	1	1	0	0	0	3	0.214286	0	0	0	3.30954	3.30954	5.98315	0	0	0	1	0.585142	364.2	366.2	366.2	366	4.23	27
ILMN_1218967	Kif2c	Mus musculus kinesin family member 2C (Kif2c), mRNA. XM_986361	5.78072	5.77839	8.27136	13.7634	4.05123	2.80524	3.59123	4.63389	6.45564	15.1954	7.17946	2.48759	4.40477	5.21036	0	0	0	1	0	0	0	0	0	1	0	0	0	0	2	0.142857	0	0	0	2.25881	2.25881	3.57174	0	0	0	1	0.525691	333.3	335.3	335.3	335	3.32	27
ILMN_2977492	Moxd1	Mus musculus monooxygenase, DBH-like 1 (Moxd1), mRNA.	5.76032	16.917	3.49556	-1.37986	-1.15318	1.15143	-1.31638	2.00924	-1.31374	5.50624	1.2818	2.09519	2.35006	8.71223	0	1	0	0	0	0	0	0	0	0	0	0	0	0	1	0.0714286	0	0	0	1.77737	1.77737	2.40595	0	0	0	1	0.445944	313.8	315.8	315.9	315.6	2.41	27
ILMN_2840091	Ugcg	Mus musculus UDP-glucose ceramide glucosyltransferase (Ugcg), mRNA.	5.75953	8.89771	9.17113	5.59547	2.53893	1.95433	4.71089	3.30763	3.04635	8.9567	5.46994	2.46567	4.20605	4.33761	1	1	1	1	0	0	1	0	0	1	1	0	0	0	7	0.5	0.462256	0	0	1.01775	1.48001	2.16049	0.312333	0	0	0.687667	0.648938	269.4	273.4	273.6	273	5.42	27
ILMN_2964042	Bgn	Mus musculus biglycan (Bgn), mRNA.	5.75883	12.1709	7.67451	10.5565	3.1656	5.06671	8.02221	6.57242	3.43292	16.1665	6.35415	2.79197	7.92238	8.51177	1	1	1	1	0	0	1	1	0	1	1	0	1	1	10	0.714286	0.385426	0	0	1.19657	1.58199	3.11391	0.243633	0	0	0.756367	0.713328	282.3	286.3	286.5	285.9	7.2	27
ILMN_2727663	Tgfbi	Mus musculus transforming growth factor, beta induced (Tgfbi), mRNA.	5.75633	10.3202	16.3271	8.93297	5.28023	2.95196	10.9382	11.6566	5.35642	31.918	8.27251	6.90359	8.54137	6.15518	0	0	1	1	0	0	1	1	0	1	0	0	0	0	5	0.357143	1.26446	0	0	1.91085	3.17531	4.50033	0.398217	0	0	0.601783	0.683935	320.6	324.6	324.8	324.2	5.81	27
ILMN_2694275	Lxn	Mus musculus latexin (Lxn), mRNA.	5.73503	4.80277	8.17447	7.46602	7.37621	3.48727	6.08645	6.48632	3.34392	10.416	5.98375	2.45877	5.20092	4.21155	1	1	1	1	1	0	1	1	0	1	1	0	1	0	10	0.714286	0.309742	0	0	0.763945	1.07369	2.30079	0.288485	0	0	0.711515	0.753257	243.3	247.3	247.5	246.9	8.87	27
ILMN_3008924	Mobkl2a	Mus musculus MOB1, Mps One Binder kinase activator-like 2A (yeast) (Mobkl2a), mRNA. XM_618785 XM_923737	5.71944	5.9451	8.39351	4.58188	3.03206	2.03895	6.41487	5.01683	4.26727	6.86281	5.70153	2.97836	3.48671	3.36122	1	0	1	1	0	0	1	1	0	1	1	0	0	0	7	0.5	0	0	0	1.01702	1.01702	2.12741	0	0	0	1	0.64146	268.6	270.6	270.7	270.4	5.37	27
ILMN_1226606	Tmem132a	Mus musculus transmembrane protein 132A (Tmem132a), mRNA.	5.70371	5.87817	7.4329	8.65684	5.41334	3.59409	6.12258	6.11192	2.3353	12.0659	8.7286	2.60676	2.50128	3.97819	0	0	0	1	0	0	0	0	0	1	1	0	0	0	3	0.214286	0	0.0006	0	1.88811	1.88871	3.06875	0	0.000318	0	0.999682	0.538692	318.8	322.8	322.9	322.3	3.5	27
ILMN_2698499	Nox4	Mus musculus NADPH oxidase 4 (Nox4), mRNA.	5.70321	5.46542	14.9772	9.24594	11.5952	7.22927	10.4939	13.6493	3.68613	10.2324	11.5546	2.03309	3.07041	8.78561	0	0	1	1	1	0	1	1	0	0	1	0	0	0	6	0.428571	0.943496	0	0	2.10263	3.04613	4.23623	0.309736	0	0	0.690264	0.630093	328.2	332.2	332.3	331.7	4.81	27
ILMN_1222471	Gmfg	Mus musculus glia maturation factor, gamma (Gmfg), transcript variant 1, mRNA.	5.70124	7.65463	36.4608	7.79409	4.00327	2.53793	8.93396	6.90038	2.3298	12.8902	15.4384	2.24934	5.09189	5.33506	0	0	1	0	0	0	0	0	0	0	1	0	0	0	2	0.142857	1.63271	0	0.046936	2.61054	4.29019	4.63564	0.380568	0	0.01094	0.608492	0.587933	347.3	353.3	353.6	352.7	3.84	27
ILMN_1230864	Clasp1	PREDICTED: Mus musculus CLIP associating protein 1, transcript variant 23 (Clasp1), mRNA.	5.69778	1.83375	2.74176	2.59969	1.68205	-1.54403	1.83157	-1.00102	2.38392	7.87602	5.5754	1.80541	4.95368	1.52537	1	0	0	0	0	0	0	0	0	1	1	0	0	0	3	0.214286	0	0	0.077594	1.19926	1.27685	1.97025	0	0	0.06077	0.93923	0.569699	286.9	290.9	291.1	290.5	3.21	27
ILMN_2649291	Lip1		5.69383	2.10823	16.3767	16.8769	12.0488	3.45049	6.97397	13.6084	4.9152	8.87122	14.8151	1.31107	3.64352	5.01761	0	0	1	1	1	0	0	1	0	0	1	0	0	0	5	0.357143	0	0	0	1.98764	1.98764	3.94162	0	0	0	1	0.621798	322.9	324.9	324.9	324.7	4.93	27
ILMN_2925424	Slc2a13	Mus musculus solute carrier family 2 (facilitated glucose transporter), member 13 (Slc2a13), mRNA.	5.67817	5.61142	5.47981	3.16986	2.98229	1.09494	4.02481	2.33525	2.44411	3.44435	9.0906	2.23203	6.097	3.60117	0	0	0	0	0	0	0	0	0	0	1	0	0	0	1	0.0714286	0.484584	0	0.584792	1.76056	2.82994	3.04951	0.171235	0	0.206645	0.622121	0.655178	334.1	340.1	340.4	339.5	2.52	27
ILMN_2687602	Pou2f2	Mus musculus POU domain, class 2, transcription factor 2 (Pou2f2), mRNA.	5.67531	19.5207	24.5657	14.3594	5.79296	2.95519	5.58369	12.7434	4.2341	86.5303	27.9883	3.92672	2.55868	9.75449	0	0	1	1	0	0	0	0	0	1	1	0	0	0	4	0.285714	0	0	0.633007	3.43032	4.06333	6.43486	0	0	0.155785	0.844215	0.654389	379.9	383.9	384	383.4	3.82	27
ILMN_2614889	B3gnt8	Mus musculus UDP-GlcNAc:betaGal beta-1,3-N-acetylglucosaminyltransferase 8 (B3gnt8), transcript variant 1, mRNA.	5.67099	6.16172	5.35626	5.14646	2.00898	3.26068	7.17371	5.15046	2.7117	7.46823	3.70494	-1.01822	3.21763	5.48738	0	0	0	0	0	0	1	0	0	0	0	0	0	0	1	0.0714286	1.03085	0	0	1.90593	2.93678	2.84493	0.351014	0	0	0.648986	0.501008	320.3	324.3	324.5	323.9	2.81	27
ILMN_2786442	Ptges	Mus musculus prostaglandin E synthase (Ptges), mRNA.	5.6705	8.99236	19.8336	3.55966	4.98364	2.79728	8.39459	4.18935	2.51751	53.3321	7.68915	1.13135	11.746	8.50813	0	0	1	0	0	0	1	0	0	1	0	0	0	0	3	0.214286	0.403652	0	0	1.95929	2.36294	3.70365	0.170826	0	0	0.829174	0.604829	322.1	326.1	326.3	325.7	4.47	27
ILMN_2651297	4632428N05Rik	Mus musculus RIKEN cDNA 4632428N05 gene (4632428N05Rik), mRNA.	5.66961	7.55344	7.5479	10.3842	4.53707	6.94464	4.76977	7.03622	2.06461	13.2857	5.42181	1.13612	1.65592	13.2951	0	0	0	1	0	0	0	0	0	0	0	0	0	0	1	0.0714286	0	0	0.24651	2.38184	2.62835	4.01705	0	0	0.093789	0.906211	0.593564	345.2	349.2	349.3	348.8	3.34	27
ILMN_1259100	Pilrb1	Mus musculus paired immunoglobin-like type 2 receptor beta 1 (Pilrb1), mRNA.	5.66784	7.68352	16.7313	15.3578	3.10058	2.36879	6.31902	2.85754	1.43126	14.9465	3.66852	1.21227	4.76244	1.12386	0	0	1	1	0	0	1	0	0	1	0	0	0	0	4	0.285714	1.32839	0	0	1.52503	2.85342	3.00728	0.465545	0	0	0.534455	0.622813	302.5	306.5	306.7	306.1	4.44	27
ILMN_2666007	Ctsz	Mus musculus cathepsin Z (Ctsz), mRNA.	5.66225	6.13657	10.9855	9.88102	5.66109	2.79162	8.0881	4.0109	3.53658	9.02984	7.79784	1.656	7.2449	6.39163	0	0	1	1	0	0	1	0	0	0	0	0	0	0	3	0.214286	0	0	0	1.78782	1.78782	3.15377	0	0	0	1	0.574839	314.3	316.3	316.4	316.1	4.06	27
ILMN_1249666	Ppap2c	Mus musculus phosphatidic acid phosphatase type 2c (Ppap2c), mRNA.	5.65725	7.08205	10.5101	5.58896	5.54697	3.0188	9.88198	4.71816	3.90407	11.6189	4.19661	1.82349	6.56548	4.00786	1	1	1	1	1	0	1	0	0	1	0	0	0	0	7	0.5	0	0	0	1.16131	1.16131	2.58796	0	0	0	1	0.663448	279.4	281.4	281.4	281.2	5.91	27
ILMN_1237431	D330050H21Rik		5.65519	2.20417	1.93522	1.66246	1.18199	1.18505	-1.37777	1.91265	1.42913	-1.15426	2.6129	1.04358	1.43386	2.06817	1	0	0	0	0	0	0	0	0	0	0	0	0	0	1	0.0714286	0	0	0.054598	1.18934	1.24394	1.44017	0	0	0.043891	0.956109	0.40671	284.9	288.9	289	288.4	1.63	27
ILMN_1217928	C230067O06Rik		5.65489	14.8758	6.49554	5.54482	4.90536	5.59127	8.8483	7.53614	2.03635	17.4131	5.92802	2.00328	5.38159	5.92003	0	0	0	0	0	0	1	0	0	1	0	0	0	0	2	0.142857	1.05233	0	0.361092	2.31621	3.72963	4.16039	0.282154	0	0.096817	0.621029	0.634137	346.9	352.9	353.2	352.3	3.36	27
ILMN_1248791	Sntb2		5.63973	33.372	9.5707	8.98999	5.08328	2.24276	3.27974	2.88701	3.30802	5.38246	17.5731	4.97686	10.2484	6.2125	0	1	1	1	0	0	0	0	0	0	1	0	0	0	4	0.285714	0.531412	0	0	1.8764	2.40781	3.77076	0.220704	0	0	0.779296	0.628619	318.7	322.7	322.9	322.3	4.68	27
ILMN_2700608	Stx1a	Mus musculus syntaxin 1A (brain) (Stx1a), mRNA.	5.62216	11.905	5.42971	8.45439	3.81029	5.58923	3.62615	4.10029	4.67044	21.5508	10.2756	1.05599	7.88403	3.29476	0	0	0	1	0	0	0	0	0	1	1	0	0	0	3	0.214286	0.190452	0	0	2.1167	2.30715	3.53311	0.082548	0	0	0.917452	0.551634	328.2	332.2	332.3	331.8	3.66	27
ILMN_2620336	Ralb	Mus musculus v-ral simian leukemia viral oncogene homolog B (ras related) (Ralb), mRNA.	5.61146	2.93189	5.3344	4.03402	2.39416	2.7671	4.02408	3.51957	3.11608	5.50407	3.08501	1.51339	2.71754	2.7731	1	0	1	1	0	0	1	1	1	1	1	0	0	0	8	0.571429	0.313093	0	0	0.527489	0.840582	1.34653	0.372471	0	0	0.627529	0.708302	216.3	220.3	220.5	219.9	6.88	27
ILMN_2604070	Celsr3	Mus musculus cadherin, EGF LAG seven-pass G-type receptor 3 (flamingo homolog, Drosophila) (Celsr3), mRNA.	5.60397	12.5131	2.25875	2.01623	3.32598	3.16839	3.60106	1.73929	4.43922	3.22411	3.94015	1.94223	1.97698	1.02862	0	1	0	0	0	0	0	0	0	0	0	0	0	0	1	0.0714286	0	0	0	1.30302	1.30302	2.00289	0	0	0	1	0.512073	288.7	290.7	290.7	290.5	3.15	27
ILMN_1252543	Atp7a		5.60096	4.3698	6.14239	2.85059	3.48694	1.13772	2.86283	2.56068	1.47427	6.07661	4.56045	1.17436	3.4044	1.75667	1	0	1	0	0	0	0	0	0	1	0	0	0	0	3	0.214286	0	0.001962	0.153154	0.976617	1.13173	1.77837	0	0.001734	0.135327	0.862939	0.638013	276.5	282.5	282.8	281.9	3.65	27
ILMN_2565096	B130008O17Rik		5.60087	8.93499	4.35825	4.56381	3.32575	1.18647	1.36133	2.73038	2.2448	14.9582	10.2486	1.01755	3.51104	3.43412	0	1	0	0	0	0	0	0	0	1	1	0	0	0	3	0.214286	0	0	0	1.27445	1.27445	2.49813	0	0	0	1	0.617378	286.9	288.9	288.9	288.7	4.84	27
ILMN_2711461	Tgfb1	Mus musculus transforming growth factor, beta 1 (Tgfb1), mRNA.	5.60058	24.2599	18.7235	10.7049	10.1007	3.53375	7.57266	11.0993	3.69288	43.3682	6.29781	2.65082	7.6375	11.9338	0	1	1	1	1	0	1	1	0	1	0	0	0	1	8	0.571429	0	0	0.281888	1.52765	1.80954	4.30779	0	0	0.155779	0.844221	0.770875	310.7	314.7	314.9	314.3	7.49	27
ILMN_2742861	Serpina3f	Mus musculus serine (or cysteine) peptidase inhibitor, clade A, member 3F (Serpina3f), mRNA.	5.59951	6.16671	31.3561	1.68494	3.38693	2.60309	5.34956	5.04027	7.8813	10.4223	7.79717	1.0033	6.6142	8.14933	0	0	1	0	0	0	0	0	0	0	0	0	0	0	1	0.0714286	0	0.015673	0	2.94163	2.9573	4.38715	0	0.0053	0	0.9947	0.499534	355.1	359.1	359.2	358.6	2.95	27
ILMN_3011353	Mbp	Mus musculus myelin basic protein (Mbp), transcript variant 8, mRNA.	5.59068	12.92	13.6687	4.03279	2.93659	1.76602	2.82013	2.95115	2.05402	11.91	4.10036	1.60861	3.33126	2.14078	0	1	1	0	0	0	0	0	0	1	0	0	0	0	3	0.214286	0	0	0	1.43463	1.43463	2.4245	0	0	0	1	0.556209	296.5	298.5	298.5	298.3	3.76	27
ILMN_2737713	Edn1	Mus musculus endothelin 1 (Edn1), mRNA.	5.58913	5.38869	4.50718	3.24347	1.63953	1.74527	2.06554	4.12831	2.37819	2.37331	2.51686	2.23199	3.37402	3.1915	1	1	1	1	0	0	0	1	0	0	0	0	0	0	5	0.357143	0.234184	0	0	0.716137	0.950321	1.60667	0.246426	0	0	0.753574	0.667492	240.8	244.8	244.9	244.4	4.62	27
ILMN_3160218	Amica1	Mus musculus adhesion molecule, interacts with CXADR antigen 1 (Amica1), mRNA.	5.58855	6.38034	9.28386	2.0778	7.70823	-1.1409	3.62349	2.27781	4.77912	9.01441	5.9879	1.49578	8.98862	4.6185	0	0	1	0	1	0	0	0	0	0	0	0	0	0	2	0.142857	0	0	0	1.81864	1.81864	2.92889	0	0	0	1	0.534301	315.7	317.7	317.7	317.5	3.44	27
ILMN_1251541	LOC385699		5.58052	4.15284	10.6225	5.14296	4.88006	3.14934	6.08839	5.23105	2.99653	9.5617	5.74278	2.19935	4.51513	5.61129	1	0	1	1	1	0	1	1	0	1	1	0	0	0	8	0.571429	0.121048	0	0	1.07326	1.19431	2.34287	0.101354	0	0	0.898646	0.657313	273.2	277.2	277.4	276.8	5.67	27
ILMN_2500434	1500011B03Rik	PREDICTED: Mus musculus RIKEN cDNA 1500011B03 gene, transcript variant 2 (1500011B03Rik), mRNA.	5.56218	4.31901	3.51726	7.11853	2.62213	2.9304	2.46273	2.26412	4.104	15.4864	6.85806	2.42315	3.77977	3.65936	0	0	0	1	0	0	0	0	0	1	0	0	0	0	2	0.142857	0	0	0	1.66231	1.66231	2.76545	0	0	0	1	0.549176	308.4	310.4	310.5	310.2	3.65	27
ILMN_2689207	Col6a3	Mus musculus procollagen, type VI, alpha 3 (Col6a3), mRNA.	5.55467	1.76696	3.43462	-1.06056	6.37374	3.40682	4.80481	5.28709	1.2865	11.074	2.97977	2.01578	4.2227	3.10854	0	0	0	0	1	0	0	0	0	1	0	0	0	0	2	0.142857	0	0	0.010383	1.62037	1.63075	2.75564	0	0	0.006367	0.993633	0.561777	306.9	310.9	311	310.4	3.77	27
ILMN_1223041	Abi3		5.55245	6.57322	6.69763	4.94037	2.01589	1.57508	10.3066	3.90948	5.15419	35.604	4.14228	5.17814	2.76383	5.07179	0	0	0	0	0	0	1	0	0	1	0	0	0	0	2	0.142857	0	0	0.22692	1.88175	2.10867	3.3567	0	0	0.107613	0.892387	0.62057	327.2	331.2	331.4	330.8	3.67	27
ILMN_1238276	Hist1h2ai	Mus musculus histone cluster 1, H2ai (Hist1h2ai), mRNA.	5.54918	14.5421	19.7209	9.17851	3.98384	3.437	8.04582	23.6772	2.74465	27.0083	7.80366	2.60765	7.92842	11.6966	0	1	1	1	0	0	1	1	0	1	0	0	0	0	6	0.428571	0	0	0	2.25112	2.25112	4.80192	0	0	0	1	0.648403	333	335	335	334.8	5.53	27
ILMN_1247702	Lmo4		5.53478	9.67526	5.12464	2.6488	2.26602	1.68106	3.54617	-1.06502	2.21815	4.29771	9.22501	2.58944	2.95666	4.71514	0	1	0	0	0	0	0	0	0	0	1	0	0	0	2	0.142857	0	0	0.01515	1.49688	1.51203	2.22087	0	0	0.01002	0.98998	0.499513	300.7	304.7	304.9	304.3	2.9	27
ILMN_2484707	Tyms	Mus musculus thymidylate synthase (Tyms), mRNA.	5.53228	5.43884	17.6914	5.29261	2.97366	3.89764	9.66815	2.96499	2.87652	8.86119	2.23295	1.67977	2.70757	3.10803	0	0	1	0	0	0	1	0	0	0	0	0	0	0	2	0.142857	0	0	0	2.15351	2.15351	3.28734	0	0	0	1	0.508682	329.4	331.4	331.4	331.2	3.11	27
ILMN_2936468	5730596K20Rik	Mus musculus RIKEN cDNA 5730596K20 gene (5730596K20Rik), mRNA.	5.53209	5.82786	12.4846	7.39905	5.4899	1.69508	5.41665	6.66856	3.98013	15.4968	9.34309	-2.00938	4.78063	4.29428	0	0	1	1	0	0	0	0	0	1	1	0	0	0	4	0.285714	0	0	0	1.9026	1.90259	3.28692	0	0	0	1	0.565872	319.4	321.4	321.4	321.1	3.91	27
ILMN_2908070	Gtse1	Mus musculus G two S phase expressed protein 1 (Gtse1), mRNA.	5.53161	8.1128	6.72076	6.25331	6.65381	4.97656	9.67271	5.26552	4.43985	13.267	8.41419	2.66367	5.64706	11.4137	0	0	0	0	0	0	1	0	0	0	0	0	0	0	1	0.0714286	0	0	0	2.46987	2.46987	4.00512	0	0	0	1	0.537492	340.5	342.5	342.5	342.3	3.49	27
ILMN_1214783	A530050E01Rik		5.53027	17.4962	13.3007	4.22374	2.44596	1.16593	4.04035	2.95002	1.98777	6.04454	3.27723	2.2855	3.10358	3.66932	0	1	1	0	0	0	0	0	0	0	0	0	0	0	2	0.142857	0	0	0.006555	1.64232	1.64887	2.64713	0	0	0.003976	0.996024	0.536533	307.8	311.8	311.9	311.3	3.43	27
ILMN_2675811	Slc11a1	Mus musculus solute carrier family 11 (proton-coupled divalent metal ion transporters), member 1 (Slc11a1), mRNA.	5.51869	5.15307	10.3059	5.50171	4.47535	2.76183	6.20633	5.91499	2.51757	11.7455	5.26962	2.458	4.48933	3.9147	1	0	1	1	1	0	1	1	0	1	1	0	0	0	8	0.571429	0	0	0	1.05386	1.05386	2.37273	0	0	0	1	0.666883	271.5	273.5	273.6	273.3	6.01	27
ILMN_1236609	Gp49a	Mus musculus glycoprotein 49 A (Gp49a), mRNA.	5.51859	7.78376	22.156	7.97619	5.19016	3.71317	10.448	3.30174	6.15153	9.87855	4.84577	3.20046	12.3517	1.42183	0	0	1	1	0	0	1	0	0	0	0	0	1	0	4	0.285714	0.070908	0	0	1.88751	1.95842	3.65542	0.036207	0	0	0.963793	0.613116	318.8	322.8	322.9	322.4	4.61	27
ILMN_1231492	Itga6	Mus musculus integrin alpha 6 (Itga6), mRNA.	5.50598	2.77284	2.27612	3.43683	2.82024	-1.3925	1.73433	-1.23362	5.18761	4.37485	3.69583	1.16979	1.31783	10.7183	1	0	0	0	0	0	0	0	1	0	0	0	0	1	3	0.214286	0.285965	0	0.253913	1.11632	1.65619	2.15023	0.172664	0	0.153311	0.674025	0.672934	291.8	297.8	298.1	297.1	3.39	27
ILMN_2841043	Maml1	Mus musculus mastermind like 1 (Drosophila) (Maml1), mRNA.	5.50579	1.97844	2.90316	2.46676	1.66066	2.39953	3.63199	4.97536	1.62952	12.3337	4.11374	1.31528	1.43794	1.99899	0	0	0	0	0	0	0	0	0	1	0	0	0	0	1	0.0714286	0.144805	0	0.181474	1.43792	1.7642	2.27161	0.08208	0	0.102865	0.815055	0.574056	306	312	312.3	311.4	2.56	27
ILMN_2729422	Ror2	Mus musculus receptor tyrosine kinase-like orphan receptor 2 (Ror2), mRNA.	5.5057	8.97555	10.8579	4.3229	5.61171	6.09563	5.47759	4.11566	3.25752	11.9323	5.43602	4.02447	6.19885	6.58127	0	0	1	0	0	0	0	0	0	0	0	0	0	0	1	0.0714286	0.134016	0	0	2.14427	2.27829	3.51273	0.058823	0	0	0.941177	0.542898	329.2	333.2	333.3	332.8	3.47	27
ILMN_2776431	C1qa	Mus musculus complement component 1, q subcomponent, alpha polypeptide (C1qa), mRNA.	5.50255	2.64977	17.7132	6.48848	3.3159	3.68624	2.91675	16.0993	4.95558	25.021	13.7845	1.76722	1.94104	2.88542	0	0	1	0	0	0	0	0	0	0	0	0	0	0	1	0.0714286	0	0	0.348444	3.2891	3.63755	4.98807	0	0	0.095791	0.904209	0.54884	371.5	375.5	375.6	375.1	2.65	27
ILMN_1251109	Slc25a45	Mus musculus solute carrier family 25, member 45 (Slc25a45), mRNA.	5.50217	8.22757	21.1275	12.8162	3.68519	3.82995	5.54351	4.71097	4.12428	12.7784	9.9602	2.19494	5.32581	5.88392	0	0	1	1	0	0	0	0	0	1	1	0	0	0	4	0.285714	0	0	0.07523	1.95314	2.02837	3.6155	0	0	0.037089	0.962911	0.609351	324.5	328.5	328.6	328.1	4.27	27
ILMN_2847437	A430084P05Rik	Mus musculus RIKEN cDNA A430084P05 gene (A430084P05Rik), mRNA.	5.49635	6.80377	9.39846	5.43214	2.59134	-1.41551	4.80554	-1.03299	3.54929	1.74412	3.93796	2.08628	2.19944	1.0219	0	0	1	0	0	0	0	0	0	0	0	0	0	0	1	0.0714286	0	0	0	1.83021	1.83021	2.55774	0	0	0	1	0.463334	316.2	318.2	318.3	318	2.59	27
ILMN_2978038	Myh8	Mus musculus myosin, heavy polypeptide 8, skeletal muscle, perinatal (Myh8), mRNA.	5.48969	21.9173	5.64012	2.64928	3.54523	1.59052	1.12384	5.87647	1.91766	-2.02109	-2.62133	1.3135	-1.61474	1.08465	0	1	0	0	0	0	0	0	0	0	0	0	0	0	1	0.0714286	0	0	0.186905	1.89459	2.08149	2.99222	0	0	0.089794	0.910206	0.56438	326.3	330.3	330.5	329.9	2.82	27
ILMN_1228804	A430106G13Rik		5.48722	5.2706	2.44592	2.03403	3.80016	1.37931	2.87165	1.91531	2.05551	4.34473	6.6456	2.13256	1.38057	1.30846	0	0	0	0	0	0	0	0	0	0	1	0	0	0	1	0.0714286	0.156946	0.017807	0	1.28033	1.45508	1.84622	0.10786	0.012238	0	0.879902	0.48691	288.5	294.5	294.8	293.9	2.48	27
ILMN_1254015	Akr1c12	Mus musculus aldo-keto reductase family 1, member C12 (Akr1c12), mRNA.	5.48674	6.30108	17.244	16.1787	5.93744	2.60688	6.79315	5.47525	2.25538	12.9723	5.49693	2.3433	4.11056	1.85535	0	0	1	1	0	0	0	0	0	0	0	0	0	0	2	0.142857	0	0	0.164075	2.12992	2.294	3.84689	0	0	0.071524	0.928476	0.612537	334.3	338.3	338.5	337.9	3.9	27
ILMN_1220608	1700081H05Rik		5.48085	3.19504	9.62509	2.15006	2.76025	2.80782	3.55123	3.91687	4.52664	9.52663	4.89522	1.28875	6.3521	6.89034	0	0	1	0	0	0	0	0	0	1	0	0	0	0	2	0.142857	3.92533	0	0	1.42262	5.34794	2.64916	0.733988	0	0	0.266012	0.601549	297.8	301.8	302	301.4	4	27
ILMN_2634083	Cdkn1a	Mus musculus cyclin-dependent kinase inhibitor 1A (P21) (Cdkn1a), mRNA.	5.47316	5.57975	8.0576	4.57655	7.51274	2.1955	4.04001	2.92817	2.60763	4.09359	3.23855	1.81529	2.65743	2.53041	1	1	1	1	1	0	1	0	0	1	1	0	0	0	8	0.571429	0	0	0.010132	0.499631	0.509763	1.46666	0	0	0.019875	0.980125	0.75027	210.3	214.3	214.4	213.9	8.6	27
ILMN_2589667	Cpeb2	Mus musculus cytoplasmic polyadenylation element binding protein 2 (Cpeb2), mRNA.	5.47022	2.57404	5.22588	1.42899	1.63717	1.86516	2.68872	-1.81642	1.62131	-1.23922	2.33804	1.0542	1.97424	2.92095	1	0	1	0	0	0	0	0	0	0	0	0	0	0	2	0.142857	0	0.065176	0	1.0617	1.12687	1.46629	0	0.057838	0	0.942162	0.471778	275.3	279.3	279.5	278.9	2.36	27
ILMN_1233117	E030040G24Rik		5.46814	66.6562	28.374	31.7257	4.93442	4.02231	27.3093	7.255	2.26324	37.0311	10.4143	5.99448	26.4012	8.8918	0	1	1	1	0	0	1	0	0	1	1	0	1	0	7	0.5	2.7254	0	0	2.1724	4.8978	6.25468	0.556454	0	0	0.443546	0.741904	331.5	335.5	335.6	335	7.56	27
ILMN_3099758	Pi4k2b	Mus musculus phosphatidylinositol 4-kinase type 2 beta (Pi4k2b), transcript variant 2, mRNA.	5.46577	9.258	4.16813	7.05536	4.79516	2.8162	8.35454	2.49005	5.31793	7.13015	6.60679	1.97142	6.52073	3.00417	0	0	0	0	0	0	1	0	0	0	0	0	0	0	1	0.0714286	0	0	0	2.05053	2.05053	3.13158	0	0	0	1	0.508908	325.4	327.4	327.5	327.2	3.11	27
ILMN_2904765	Snai1	Mus musculus snail homolog 1 (Drosophila) (Snai1), mRNA.	5.4564	8.31837	8.81478	8.02132	3.32202	5.04577	8.224	9.84574	3.11455	8.18264	17.0134	1.13469	6.35166	10.8601	0	0	1	1	0	0	1	1	0	0	1	0	0	1	6	0.428571	6.81453	0	0	1.95847	8.773	3.91385	0.776762	0	0	0.223238	0.628829	323.9	327.9	328.1	327.5	4.89	27
ILMN_2732848	Tagln2	Mus musculus transgelin 2 (Tagln2), mRNA.	5.45054	6.05685	11.2894	8.344	4.02369	2.9672	7.30143	5.68703	4.25913	13.7148	6.17002	2.37568	6.24341	5.6988	1	1	1	1	1	0	1	1	1	1	1	0	1	1	12	0.857143	0.481175	0	0	0.932497	1.41367	2.63579	0.340373	0	0	0.659627	0.736453	262.4	266.4	266.5	266	8	27
ILMN_2839569	Ctsz	Mus musculus cathepsin Z (Ctsz), mRNA.	5.44979	8.23975	41.3281	10.7882	11.8676	3.46025	9.27662	6.62181	4.66805	9.78813	10.8656	3.06354	5.46403	6.05272	0	0	1	1	1	0	1	0	0	0	1	0	0	0	5	0.357143	0	0	0	2.12354	2.12354	4.22525	0	0	0	1	0.623062	328.3	330.3	330.3	330	4.96	27
ILMN_2552695	5830436K05Rik		5.44611	1.51982	2.11726	1.015	1.24315	-1.21312	1.32683	1.48859	-1.12483	1.07813	1.39057	3.35149	2.5102	-1.30947	1	0	0	0	0	0	0	0	0	0	0	0	0	0	1	0.0714286	0	0.004832	0.078112	0.907365	0.99031	1.1282	0	0.00488	0.078877	0.916244	0.443386	266.2	272.2	272.5	271.5	1.59	27
ILMN_1245354	Tlr7	Mus musculus toll-like receptor 7 (Tlr7), mRNA.	5.42792	4.05537	22.6706	9.99703	4.0179	3.08164	5.71891	6.35812	3.28769	13.9701	5.94468	1.11033	3.92602	5.20344	0	0	1	1	0	0	0	0	0	0	0	0	0	0	2	0.142857	0	0	0	2.73881	2.73881	4.03478	0	0	0	1	0.490901	348.9	350.9	350.9	350.7	2.89	27
ILMN_2730463	Cdt1	Mus musculus chromatin licensing and DNA replication factor 1 (Cdt1), mRNA.	5.4189	5.37488	19.5081	3.69814	3.77077	2.56747	8.75556	5.28975	2.72969	11.6382	4.11224	1.31134	7.116	9.42423	0	0	1	0	0	0	0	0	0	0	0	0	0	0	1	0.0714286	5.84796	1.11e-18	0	2.5528	8.40077	3.83106	0.696122	1.32e-19	0	0.303878	0.505442	345	349	349.2	348.6	2.94	27
ILMN_2888834	Apob48r	Mus musculus apolipoprotein B48 receptor (Apob48r), mRNA.	5.41646	4.7949	23.1482	7.69201	5.74067	3.54934	10.9357	21.0402	4.19163	27.5014	17.5777	2.46129	6.09419	4.4143	0	0	1	0	0	0	1	1	0	1	1	0	0	0	5	0.357143	0.088138	0	0	2.41124	2.49938	4.58196	0.035264	0	0	0.964736	0.605698	338.6	342.6	342.8	342.2	4.56	27
ILMN_2905717	Cd180	Mus musculus CD180 antigen (Cd180), mRNA.	5.41205	11.233	17.4642	15.0961	8.64868	4.0951	6.47653	5.66117	6.2138	31.2937	10.2786	3.08506	9.98711	7.23061	0	0	1	1	0	0	0	0	0	1	0	0	0	0	3	0.214286	0	0	0	2.60136	2.60136	4.82562	0	0	0	1	0.595696	344.7	346.7	346.7	346.5	4.42	27
ILMN_3079461	Raet1b	Mus musculus retinoic acid early transcript beta (Raet1b), mRNA.	5.40858	7.5979	6.14047	6.48542	3.37461	4.50047	7.99601	5.46009	3.23567	5.9069	5.10302	2.76121	9.02859	5.77615	0	0	0	1	0	0	1	0	0	0	0	0	0	0	2	0.142857	0	0	0	1.58725	1.58725	2.88695	0	0	0	1	0.587648	304.7	306.7	306.7	306.5	4.28	27
ILMN_1256245	Rlf	PREDICTED: Mus musculus rearranged L-myc fusion sequence, transcript variant 3 (Rlf), mRNA.	5.39688	18.5361	6.94151	5.32876	5.94699	1.7066	4.47485	3.21563	6.40782	6.80675	4.73996	1.98933	3.92221	2.07281	0	1	1	1	1	0	0	0	1	0	0	0	0	0	5	0.357143	0.678961	0	0.253215	1.25886	2.19104	2.95948	0.309881	0	0.115568	0.574551	0.728402	300.3	306.3	306.6	305.7	4.96	27
ILMN_3158341	Usp6nl	Mus musculus USP6 N-terminal like (Usp6nl), transcript variant 2, mRNA.	5.38707	2.43676	4.48498	3.96472	2.93199	2.45764	2.68988	2.9415	1.50622	4.09823	1.93405	1.53867	1.74022	3.48116	1	0	0	0	0	0	0	0	0	0	0	0	0	0	1	0.0714286	1.49029	0	0	1.16958	2.65987	1.69929	0.560289	0	0	0.439711	0.488564	281.3	285.3	285.5	284.9	2.52	27
ILMN_2625351	Sh3bgrl3	Mus musculus SH3 domain binding glutamic acid-rich protein-like 3 (Sh3bgrl3), mRNA.	5.38417	10.3675	15.5835	13.0142	4.81208	3.60163	11.3013	7.92425	4.73079	23.0442	11.364	3.02958	7.45651	6.36823	0	1	1	1	0	0	1	1	0	1	1	0	0	0	7	0.5	0.376703	0	0	1.66321	2.03992	3.86275	0.184666	0	0	0.815334	0.678446	308.9	312.9	313	312.5	6.1	27
ILMN_3009373	A4galt	Mus musculus alpha 1,4-galactosyltransferase (A4galt), mRNA.	5.3756	3.70165	6.17162	5.47182	4.11337	3.08063	10.5166	5.14573	5.12773	11.9155	5.69137	1.67074	4.05331	9.53467	0	0	0	0	0	0	1	0	0	0	0	0	0	0	1	0.0714286	0	0	0	2.12087	2.12087	3.44515	0	0	0	1	0.538292	328.1	330.1	330.2	329.9	3.5	27
ILMN_2892413	Tnfrsf22	Mus musculus tumor necrosis factor receptor superfamily, member 22 (Tnfrsf22), mRNA.	5.37141	6.35621	3.87696	1.6017	2.45482	2.13484	7.33278	2.11591	1.72633	6.39126	1.80785	1.96482	6.34623	3.08849	0	0	0	0	0	0	1	0	0	0	0	0	0	0	1	0.0714286	0	0	0	2.02292	2.02292	2.62566	0	0	0	1	0.422167	324.3	326.3	326.4	326.1	2.19	27
ILMN_2913913	Unc13d	Mus musculus unc-13 homolog D (C. elegans) (Unc13d), mRNA.	5.36675	1.6771	3.23934	7.30893	1.81945	1.55736	1.25968	2.54365	3.66202	5.2605	6.78183	1.84639	6.26363	6.48313	0	0	0	1	0	0	0	0	0	0	0	0	0	0	1	0.0714286	0	0	0.19939	1.81054	2.00993	2.76619	0	0	0.099202	0.900798	0.553572	323.4	327.4	327.6	327	2.64	27
ILMN_2557265	C430014M02Rik		5.36499	2.05632	3.55716	1.10567	3.73079	-1.17009	2.54471	2.33197	3.4845	6.71646	3.51975	2.33212	2.01824	2.47868	1	0	0	0	0	0	0	0	0	0	0	0	0	0	1	0.0714286	0	0	0.12064	1.17754	1.29818	1.81023	0	0	0.092931	0.907069	0.553762	288.1	292.1	292.2	291.6	2.71	27
ILMN_2451022	Vim	Mus musculus vimentin (Vim), mRNA.	5.35728	10.822	9.64496	12.754	10.751	3.86328	11.2265	7.24181	3.22543	9.5701	4.38864	3.85928	5.98036	4.63141	1	1	1	1	1	0	1	1	0	1	1	0	1	0	10	0.714286	0.583455	0.004254	0.014781	0.881816	1.48431	3.11886	0.393083	0.002866	0.009958	0.594093	0.794434	256.7	264.7	265.2	263.9	10.06	27
ILMN_2784019	Ggta1	Mus musculus glycoprotein galactosyltransferase alpha 1, 3 (Ggta1), mRNA.	5.35384	1.69662	4.04328	7.94782	2.07401	1.86445	5.36783	2.0942	3.2988	4.84591	3.63146	1.52339	3.42452	2.2667	0	0	0	1	0	0	1	0	0	0	0	0	0	0	2	0.142857	0.599025	0	0	1.18565	1.78468	1.87671	0.335649	0	0	0.664351	0.529337	281.8	285.8	286	285.4	3.15	27
ILMN_2751037	Spata13		5.33726	8.03074	5.23141	5.83002	1.88617	2.08891	3.47666	2.91112	2.82745	7.18921	4.89361	1.78879	3.12733	4.10844	1	1	1	1	0	0	0	0	0	1	1	0	0	0	6	0.428571	0.239528	0	0	0.919331	1.15886	1.84665	0.206693	0	0	0.793307	0.628365	260.9	264.9	265.1	264.5	4.93	27
ILMN_3098120	Frrs1	Mus musculus ferric-chelate reductase 1 (Frrs1), mRNA.	5.3368	19.0872	15.6095	5.81952	6.16226	2.76159	8.13893	7.33146	1.85287	3.52902	4.40564	4.03037	6.46507	2.27329	0	1	1	0	0	0	1	0	0	0	0	0	0	0	3	0.214286	0.417612	0	0	1.77957	2.19719	3.23858	0.190067	0	0	0.809933	0.589683	314.4	318.4	318.5	318	4.23	27
ILMN_2648669	Gpnmb	Mus musculus glycoprotein (transmembrane) nmb (Gpnmb), mRNA.	5.33033	8.82278	10.3603	12.1839	7.94067	8.10929	9.82842	20.8833	10.8161	32.3404	15.9986	1.90389	7.66189	7.3909	0	0	1	1	1	0	1	1	1	1	1	0	0	0	8	0.571429	0.269417	0	0	2.01108	2.2805	4.66573	0.118139	0	0	0.881861	0.677676	324.1	328.1	328.3	327.7	6.18	27
ILMN_2712151	1810033B17Rik	Mus musculus RIKEN cDNA 1810033B17 gene (1810033B17Rik), mRNA.	5.32507	26.4654	6.80514	5.27247	2.34216	1.80725	4.28703	8.53328	1.51416	5.59369	7.08688	7.31675	20.4203	2.19565	0	1	1	1	0	0	0	1	0	0	1	0	1	0	6	0.428571	0.621391	0	0	1.40261	2.024	3.07678	0.307011	0	0	0.692989	0.660244	295.4	299.4	299.5	299	5.65	27
ILMN_2846904	Mest	Mus musculus mesoderm specific transcript (Mest), mRNA.	5.31695	7.97969	8.95116	1.7574	2.77156	2.56658	6.2214	5.0197	1.57499	7.50473	7.57949	1.31251	7.10007	2.81925	0	0	1	0	0	0	1	0	0	0	1	0	0	0	3	0.214286	0	0	0.207716	1.6529	1.86061	3.06753	0	0	0.111638	0.888362	0.636626	317.1	321.1	321.2	320.6	3.83	27
ILMN_2482662	A730036E13Rik	PREDICTED: Mus musculus RIKEN cDNA A730036E13 gene (A730036E13Rik), mRNA.	5.31474	1.30122	1.04407	1.40443	1.51982	1.96465	-1.31638	1.04605	2.79328	4.14154	1.96442	1.51476	3.10451	1.41249	1	0	0	0	0	0	0	0	0	0	0	0	0	0	1	0.0714286	0	0	0.212917	0.766629	0.979546	1.33191	0	0	0.217363	0.782637	0.646012	263.7	267.7	267.8	267.3	2.56	27
ILMN_2580205	D130077B20Rik		5.30591	8.43936	6.54617	1.24387	3.09307	-1.3931	3.60985	1.51123	4.04446	5.83285	8.32269	2.70006	2.75045	1.23861	0	1	1	0	0	0	0	0	0	0	1	0	0	0	3	0.214286	1.01075	0.003823	0.028567	1.38935	2.43249	2.33021	0.415521	0.001572	0.011744	0.571164	0.56602	296.7	304.7	305.2	303.9	3.33	27
ILMN_2867899	Cdc20	Mus musculus cell division cycle 20 homolog (S. cerevisiae) (Cdc20), mRNA.	5.30536	8.31683	14.7554	9.20055	4.17762	5.44318	8.95665	7.54646	2.9964	18.0372	7.81164	2.57113	4.07058	11.6635	0	0	1	1	0	0	0	0	0	1	0	0	0	0	3	0.214286	0	0	0	2.54409	2.54409	4.41658	0	0	0	1	0.567976	342.9	344.9	344.9	344.7	3.94	27
ILMN_1223834	Il8rb	Mus musculus interleukin 8 receptor, beta (Il8rb), mRNA.	5.30527	3.27706	6.35999	-1.02821	-1.04261	-1.01399	2.57498	1.45786	-1.99578	1.13792	1.52824	1.83714	1.5841	1.06283	1	0	1	0	0	0	0	0	0	0	0	0	0	0	2	0.142857	0.07556	0	0	0.883401	0.958961	1.25832	0.078793	0	0	0.921207	0.474545	257.4	261.4	261.5	261	2.26	27
ILMN_2665008	Rab31	Mus musculus RAB31, member RAS oncogene family (Rab31), mRNA.	5.30444	6.20401	13.2347	9.11145	4.23071	4.7523	7.72471	7.26796	4.59737	18.9632	7.26846	2.0852	6.39968	6.04388	0	0	1	1	0	0	1	1	0	1	1	0	0	0	6	0.428571	0.12022	0	0	1.19781	1.31803	3.01746	0.091212	0	0	0.908788	0.702979	282.1	286.1	286.2	285.7	6.97	27
ILMN_2953277	EG433182	Mus musculus predicted gene, EG433182 (EG433182), mRNA.	5.30095	3.65879	10.6953	8.67065	3.55828	1.39598	8.43577	4.67819	1.5535	9.35389	2.34453	3.50416	5.69765	7.55117	0	0	1	1	0	0	1	0	0	0	0	0	0	0	3	0.214286	0	0	0	2.06698	2.06698	3.09468	0	0	0	1	0.499065	326.1	328.1	328.1	327.9	2.99	27
ILMN_2663604	Fignl1	Mus musculus fidgetin-like 1 (Fignl1), mRNA.	5.30085	3.18281	6.28353	8.29441	3.43912	2.38064	9.94602	3.31475	2.66578	14.8683	6.99464	3.21288	3.10509	7.3429	0	0	0	1	0	0	1	0	0	1	0	0	0	0	3	0.214286	0	0	0	1.68284	1.68284	2.93309	0	0	0	1	0.569693	309.4	311.4	311.5	311.2	3.97	27
ILMN_3162369	Fbxo33	Mus musculus F-box protein 33 (Fbxo33), mRNA.	5.29828	5.1495	4.72495	5.43048	2.05877	1.74237	6.15193	2.38903	4.80749	13.3562	2.14099	2.26377	1.1977	2.05135	0	0	0	0	0	0	1	0	0	1	0	0	0	0	2	0.142857	0.356259	0	0.115689	1.51743	1.98938	2.55837	0.17908	0	0.058153	0.762766	0.586224	307.2	313.2	313.5	312.6	3.3	27
ILMN_1219067	A830007P12Rik	Mus musculus RIKEN cDNA A830007P12 gene (A830007P12Rik), mRNA.	5.2959	2.91973	11.4921	9.55966	2.4977	2.57983	4.74103	5.23087	2.86535	7.37069	8.1342	4.7533	2.03148	2.99989	0	0	1	1	0	0	0	0	0	0	1	0	0	0	3	0.214286	1.25836	0	0	1.83147	3.08983	2.8775	0.407259	0	0	0.592741	0.526274	317.2	321.2	321.4	320.8	3.27	27
ILMN_2682928	Rai14	Mus musculus retinoic acid induced 14 (Rai14), mRNA.	5.29461	12.5519	8.40283	7.19772	3.77731	3.4077	7.10808	4.21271	2.57521	6.59071	3.02414	1.65972	3.85599	2.92427	1	1	1	1	1	0	1	1	0	1	0	0	0	0	8	0.571429	0.569592	0	0	0.692899	1.26249	1.96216	0.451165	0	0	0.548835	0.737301	238.6	242.6	242.8	242.2	8.23	27
ILMN_2687403	Fcgr3	Mus musculus Fc receptor, IgG, low affinity III (Fcgr3), mRNA.	5.29461	10.3491	36.4943	7.60053	11.2869	4.06971	12.0741	7.08221	2.4669	23.51	8.42134	3.02933	11.4974	6.23998	0	0	1	1	1	0	1	0	0	1	1	0	0	0	6	0.428571	0.753913	0	0	1.89242	2.64633	4.46762	0.284889	0	0	0.715111	0.6842	319.6	323.6	323.7	323.2	6.23	27
ILMN_2776603	Ccl9	Mus musculus chemokine (C-C motif) ligand 9 (Ccl9), mRNA.	5.2914	6.8266	17.8918	5.81404	5.25999	2.7683	8.41778	8.1565	2.42602	13.9888	9.14891	2.71169	6.0221	4.47693	0	0	1	0	0	0	1	1	0	1	1	0	0	0	5	0.357143	0.296322	0	0	1.64334	1.93966	3.49731	0.15277	0	0	0.84723	0.648874	307.8	311.8	312	311.4	5.21	27
ILMN_2689401	Mcoln2	Mus musculus mucolipin 2 (Mcoln2), transcript variant 2, mRNA.	5.28948	3.24099	15.1333	2.55036	1.99781	1.2047	1.90771	1.31392	2.93568	4.31821	3.35143	-1.41476	2.08344	-1.12924	0	0	1	0	0	0	0	0	0	0	0	0	0	0	1	0.0714286	1.17984	0.030785	0	2.06847	3.2791	2.7442	0.359807	0.009388	0	0.630805	0.445027	328	334	334.3	333.4	2.11	27
ILMN_2635631	Sema3f	Mus musculus sema domain, immunoglobulin domain (Ig), short basic domain, secreted, (semaphorin) 3 F (Sema3f), mRNA.	5.28764	6.14182	4.96167	15.0657	5.6509	3.01519	5.18348	5.2848	4.72805	5.21006	3.34748	1.38225	3.93474	3.30385	1	0	0	1	1	0	1	1	1	0	0	0	0	0	6	0.428571	0	0	0	1.09901	1.09901	2.52154	0	0	0	1	0.673114	274.9	276.9	276.9	276.7	6.18	27
ILMN_2936380	Sgpl1	Mus musculus sphingosine phosphate lyase 1 (Sgpl1), mRNA.	5.28645	5.87654	8.50184	13.3735	5.0544	3.16241	6.37144	6.20003	2.35191	8.24622	7.08405	2.02408	4.92788	2.7615	0	0	1	1	1	0	1	1	0	1	1	0	0	0	7	0.5	0	0	0	1.30515	1.30515	2.71546	0	0	0	1	0.639522	288.8	290.8	290.9	290.6	5.32	27
ILMN_1259610	Cd276	Mus musculus CD276 antigen (Cd276), mRNA.	5.28444	5.09447	6.89536	10.077	2.99405	8.51481	3.0944	7.45922	1.78126	9.53522	3.52262	2.35429	3.64984	3.29485	0	0	0	1	0	1	0	1	0	1	0	0	0	0	4	0.285714	0	0	0.264262	1.57505	1.83931	3.14082	0	0	0.143674	0.856326	0.671393	315.8	319.8	320	319.4	4.21	27
ILMN_1237596	D030069G17Rik		5.27675	11.3771	3.72858	3.07375	1.81937	-1.07895	1.94831	3.14323	1.26213	3.52641	5.02413	-1.9155	5.15462	3.15502	0	1	0	0	0	0	0	0	0	0	0	0	0	0	1	0.0714286	1.57632	0	0	1.8316	3.40792	2.40929	0.462546	0	0	0.537454	0.43453	317.4	321.4	321.5	321	2.07	27
ILMN_2772281	Emilin2		5.27017	14.2893	15.9903	11.8077	6.83357	5.50074	11.5675	7.39205	5.94332	30.9242	10.2386	2.3106	26.8137	5.80787	0	0	1	1	0	0	1	0	0	1	0	0	1	0	5	0.357143	0	0	0	2.41317	2.41317	4.86632	0	0	0	1	0.628081	338.6	340.6	340.7	340.4	5.07	27
ILMN_2501191	Sulf1		5.2605	6.95267	6.84227	4.19759	3.33781	2.20308	4.54349	3.49066	2.93245	7.81024	3.7471	1.77149	2.90969	4.44033	1	1	1	1	0	0	1	0	0	1	0	0	0	1	7	0.5	0	0	0	0.787169	0.787169	1.71787	0	0	0	1	0.656333	247.9	249.9	249.9	249.7	5.73	27
ILMN_2864309	OTTMUSG00000000971	Mus musculus predicted gene, OTTMUSG00000000971 (OTTMUSG00000000971), mRNA.	5.2564	8.20801	129.634	21.0502	15.7179	5.49369	20.235	32.808	2.56026	44.1477	11.7948	2.66272	9.97212	14.6516	0	0	1	1	1	0	1	1	0	1	0	0	0	0	6	0.428571	0	0	0	3.84393	3.84393	7.51043	0	0	0	1	0.616141	376.3	378.3	378.4	378.1	4.82	27
ILMN_3001322	Tmem119	Mus musculus transmembrane protein 119 (Tmem119), mRNA.	5.24821	7.30305	6.14228	9.37098	4.73072	9.32708	13.3261	8.60246	4.76913	35.7226	7.85262	4.63282	26.9784	7.57043	0	0	0	1	0	0	1	0	0	1	0	0	1	0	4	0.285714	1.87172	0	0	2.54011	4.41183	4.92848	0.42425	0	0	0.57575	0.616471	343.8	347.8	347.9	347.3	4.59	27
ILMN_1217517	Dclk1	Mus musculus doublecortin-like kinase 1 (Dclk1), mRNA.	5.24439	5.35208	8.37913	4.40554	3.10553	2.37516	5.04663	3.03033	4.78058	9.08592	3.36504	3.58704	6.71878	6.96453	0	0	1	0	0	0	0	0	0	0	0	0	0	0	1	0.0714286	0.935439	0	0	1.57807	2.51351	2.68582	0.372164	0	0	0.627836	0.56249	305.1	309.1	309.2	308.7	3.65	27
ILMN_2769490	5430435G22Rik	Mus musculus RIKEN cDNA 5430435G22 gene (5430435G22Rik), mRNA.	5.23658	8.08847	42.3576	21.2917	11.0528	4.32965	10.5257	14.7016	5.47076	21.5946	11.3616	1.2998	6.54322	7.13642	0	0	1	1	1	0	1	1	0	1	1	0	0	0	7	0.5	0.461237	0	0	2.38638	2.84762	5.09979	0.161973	0	0	0.838027	0.650394	338.1	342.1	342.2	341.7	5.51	27
ILMN_1216284	Pcdhgc5		5.23295	4.16746	5.32119	10.3309	5.63955	4.6499	8.11505	2.63203	2.78835	6.75318	3.5012	1.30505	5.41552	6.72655	0	0	0	1	1	0	1	0	0	0	0	0	0	0	3	0.214286	0	0	0	1.39265	1.39265	2.67679	0	0	0	1	0.609798	294.1	296.1	296.1	295.9	4.69	27
ILMN_2495703	Clip2	Mus musculus CAP-GLY domain containing linker protein 2 (Clip2), transcript variant 2, mRNA.	5.2315	7.5004	5.39304	14.0559	5.84726	4.11816	4.37329	7.25625	4.89371	4.75661	4.85114	1.46532	6.68642	4.12409	0	0	0	1	0	0	0	1	0	0	0	0	0	0	2	0.142857	0	0	0	1.51686	1.51686	3.02719	0	0	0	1	0.625362	297.5	299.5	299.6	299.3	4.95	27
ILMN_1216972	Clec4e	Mus musculus C-type lectin domain family 4, member e (Clec4e), mRNA.	5.22878	14.5287	28.8615	9.38502	2.87871	1.54513	12.8507	2.06094	1.41051	5.93604	2.94165	2.73638	1.93974	1.11502	0	1	1	1	0	0	1	0	0	0	0	0	0	0	4	0.285714	0	0	0	1.82264	1.82264	3.32724	0	0	0	1	0.589154	315.9	317.9	317.9	317.7	4.3	27
ILMN_1227907	Gmfg	Mus musculus glia maturation factor, gamma (Gmfg), transcript variant 1, mRNA.	5.22697	5.46858	42.4524	6.01023	4.09368	2.40777	7.46282	4.22851	2.02854	12.8245	8.99454	3.85604	6.16343	2.90731	0	0	1	0	0	0	1	0	0	1	1	0	0	0	4	0.285714	0.705668	0	0.025966	1.94947	2.6811	3.7455	0.263201	0	0.009685	0.727115	0.616831	323	329	329.3	328.4	4.46	27
ILMN_2727911	Gmip	Mus musculus Gem-interacting protein (Gmip), mRNA.	5.22643	8.91293	26.8961	4.27665	7.9367	3.60982	5.45379	5.71261	1.36618	13.3075	4.96838	4.08552	3.32096	5.02013	0	0	1	0	1	0	0	0	0	0	0	0	0	0	2	0.142857	2.29415	0	0	2.22441	4.51856	3.77235	0.507717	0	0	0.492283	0.56161	333.2	337.2	337.4	336.8	3.67	27
ILMN_2961091	Slc29a3	Mus musculus solute carrier family 29 (nucleoside transporters), member 3 (Slc29a3), mRNA.	5.22453	10.522	6.54265	17.5238	3.88372	2.42045	5.33941	7.98228	3.63155	7.02614	6.28908	3.0783	4.65818	4.60163	0	1	0	1	0	0	0	1	0	0	0	0	0	0	3	0.214286	0.11455	0	0.008347	1.70172	1.82462	3.36813	0.06278	0	0.004575	0.932645	0.623534	310.9	316.9	317.2	316.2	4.76	27
ILMN_2636110	Sgol2	Mus musculus shugoshin-like 2 (S. pombe) (Sgol2), mRNA.	5.21702	4.34022	2.56854	3.45432	4.61484	6.09299	6.39986	5.27721	2.07168	7.22869	5.43366	-2.06114	3.20117	4.65371	0	0	0	0	0	0	1	0	0	0	0	0	0	0	1	0.0714286	3.56069	0.00751	0	1.45266	5.02087	2.49846	0.709179	0.001496	0	0.289325	0.570513	299.8	305.8	306.1	305.2	3.72	27
ILMN_2772155	LOC100045780	PREDICTED: Mus musculus similar to metalloprotease-disintegrin meltrin beta (LOC100045780), mRNA.	5.21304	6.38786	7.81164	3.76711	4.97115	3.04465	4.78209	10.0184	3.38338	6.62276	3.74438	1.93792	4.2188	4.33335	1	0	1	0	1	0	1	1	0	1	0	0	0	0	6	0.428571	0.141299	0	0	1.10736	1.24866	2.30805	0.113161	0	0	0.886839	0.641183	275.8	279.8	279.9	279.4	5.18	27
ILMN_2873750	Gldc	Mus musculus glycine decarboxylase (Gldc), mRNA.	5.19771	3.52315	11.0603	1.96009	1.99076	-1.03947	3.56638	1.79191	-1.51879	6.63073	2.53881	1.84945	1.2464	2.31423	0	0	1	0	0	0	0	0	0	0	0	0	0	0	1	0.0714286	0	0	0.085316	1.92739	2.01271	2.39151	0	0	0.042389	0.957611	0.420172	323.8	327.8	328	327.4	1.79	27
ILMN_2971767	Myd88	Mus musculus myeloid differentiation primary response gene 88 (Myd88), mRNA.	5.19599	8.00407	10.853	6.10208	3.53115	2.51007	5.73224	4.01646	2.78098	10.9926	6.65897	1.90767	5.44664	4.39892	1	1	1	1	0	0	1	0	0	1	1	0	0	0	7	0.5	0.133025	0	0	1.05485	1.18787	2.36186	0.111986	0	0	0.888014	0.665978	271.8	275.8	276	275.4	5.88	27
ILMN_2668510	Hp	Mus musculus haptoglobin (Hp), mRNA.	5.18988	5.61376	50.0232	3.41655	4.17385	2.14381	15.6986	10.4879	4.44989	24.8172	7.48434	1.83056	11.5739	2.99369	0	0	1	0	0	0	1	0	0	1	0	0	0	0	3	0.214286	0	0	0	2.73703	2.73703	4.62561	0	0	0	1	0.556215	348.8	350.8	350.9	350.6	3.76	27
ILMN_1217790	Sntb2	Mus musculus syntrophin, basic 2 (Sntb2), mRNA.	5.1879	10.8163	8.43551	6.63125	3.71474	1.25288	4.64558	2.51738	1.66068	10.6084	2.29497	1.66137	2.11839	1.76501	0	1	1	1	0	0	0	0	0	1	0	0	0	0	4	0.285714	0	0	0.318614	1.31888	1.6375	2.50457	0	0	0.194574	0.805426	0.66985	305.7	309.7	309.8	309.3	3.66	27
ILMN_2760244	Snx7	Mus musculus sorting nexin 7 (Snx7), mRNA.	5.18592	9.95761	20.0333	1.5278	2.13492	3.16285	10.4596	2.97095	2.18624	2.22011	3.27388	1.03649	1.80188	3.91239	0	1	1	0	0	0	1	0	0	0	0	0	0	0	3	0.214286	2.22359	0	0	1.13857	3.36215	2.54507	0.661358	0	0	0.338642	0.667876	279.5	283.5	283.6	283.1	4.65	27
ILMN_2510128	9430028L06Rik	Mus musculus RIKEN cDNA 9430028L06 gene (9430028L06Rik), mRNA.	5.18358	5.04807	6.03352	4.7625	10.0521	3.63285	3.23463	5.67964	4.74998	15.9152	5.13477	3.37469	5.24097	11.3707	0	0	0	0	1	0	0	0	0	1	0	0	0	1	3	0.214286	1.21355	0.012406	0.006959	1.82333	3.05624	3.28165	0.397072	0.004059	0.002277	0.596592	0.59038	317.7	325.7	326.2	324.8	4.06	27
ILMN_2669782	Phca	Mus musculus phytoceramidase, alkaline (Phca), mRNA.	5.16664	3.77881	16.3878	4.33635	3.63204	4.26753	8.11764	3.91144	3.09976	19.7621	3.44971	1.0231	9.48403	4.95608	0	0	1	0	0	0	1	0	0	1	0	0	0	0	3	0.214286	0.676221	0	0	1.83762	2.51384	3.38725	0.268999	0	0	0.731001	0.595436	317.2	321.2	321.3	320.7	3.88	27
ILMN_3073563	C230021P08Rik	Mus musculus Riken cDNA C230021P08 gene (C230021P08Rik), mRNA.	5.16458	2.02202	3.60063	1.59717	2.41004	1.37038	2.87006	2.74956	2.77154	3.14458	4.11231	-1.35404	1.72768	1.87746	1	0	0	0	0	0	0	0	0	0	0	0	0	0	1	0.0714286	0	0	0	1.12181	1.12181	1.41021	0	0	0	1	0.403382	276.6	278.6	278.6	278.4	2.03	27
ILMN_1219162	Zswim6	PREDICTED: Mus musculus zinc finger, SWIM domain containing 6 (Zswim6), mRNA.	5.16091	14.2064	8.18794	34.3086	4.27843	3.31665	15.2013	10.1215	2.45771	10.3754	2.90221	3.53098	6.54745	9.54895	0	1	0	1	0	0	1	1	0	0	0	0	0	0	4	0.285714	0	0	0	2.07673	2.07673	4.39849	0	0	0	1	0.64589	326.4	328.4	328.5	328.2	5.47	27
ILMN_1229517	Ftl1		5.15385	4.82702	10.6834	5.68997	4.99187	2.87862	5.7928	4.40861	2.81788	9.19872	5.57018	2.1497	4.5019	5.35827	1	0	1	1	1	0	1	0	0	1	1	0	0	0	7	0.5	0	0	0	1.04386	1.04386	2.27758	0	0	0	1	0.656261	270.7	272.7	272.8	272.5	5.73	27
ILMN_2436781	Nol3	Mus musculus nucleolar protein 3 (apoptosis repressor with CARD domain) (Nol3), mRNA.	5.15072	11.5008	11.0809	4.52237	5.52027	3.62637	2.85831	2.1598	3.66995	2.41675	5.33689	-2.82864	5.21295	2.53627	0	1	1	0	1	0	0	0	0	0	0	0	0	0	3	0.214286	0.483524	0	0	1.41996	1.90349	2.51426	0.25402	0	0	0.74598	0.578742	296.2	300.2	300.4	299.8	3.75	27
ILMN_2428931	4631426J05Rik		5.14938	3.8087	11.2836	3.69517	2.78697	4.0018	2.85181	2.91481	2.5876	9.89615	5.44658	2.71174	6.54927	5.9006	0	0	1	0	0	0	0	0	0	0	0	0	0	0	1	0.0714286	0	0	0.236787	1.69174	1.92853	2.81168	0	0	0.122781	0.877219	0.598315	319.9	323.9	324	323.4	3.13	27
ILMN_2648661	Cap1	Mus musculus CAP, adenylate cyclase-associated protein 1 (yeast) (Cap1), mRNA.	5.1402	5.65934	9.25752	7.45599	3.82919	2.7637	6.02533	4.98675	2.90575	11.198	5.63347	2.88638	4.26201	4.15301	1	0	1	1	0	0	1	1	0	1	1	0	0	0	7	0.5	0.11341	0	0	0.984855	1.09826	2.28637	0.103262	0	0	0.896738	0.677783	266.3	270.3	270.4	269.8	6.19	27
ILMN_2802687	Col5a2	Mus musculus collagen, type V, alpha 2 (Col5a2), mRNA.	5.1297	4.75991	8.2289	3.76696	3.27165	8.16314	4.33647	2.20595	2.32634	16.7285	6.87448	2.62657	8.14755	6.01114	0	0	1	0	0	1	0	0	0	1	1	0	0	0	4	0.285714	0.73362	0	0.171597	1.489	2.39422	2.86195	0.306413	0	0.071671	0.621916	0.648414	308.6	314.6	314.9	314	4.13	27
ILMN_1239333	Iqgap1		5.12348	9.95416	10.5522	9.43276	4.18765	2.79592	5.29283	3.22037	2.999	21.2339	7.47255	3.07434	7.86747	6.28132	0	1	1	1	0	0	1	0	0	1	1	0	1	1	8	0.571429	0.314692	0	0	1.16517	1.47986	2.74702	0.21265	0	0	0.78735	0.683402	280.1	284.1	284.3	283.7	6.38	27
ILMN_2576736	Nfkb1		5.12038	13.4466	4.54782	6.5765	2.79642	-1.11253	2.56095	5.30775	1.22417	9.13434	9.62743	4.70868	6.35694	3.96156	0	1	0	1	0	0	0	0	0	1	1	0	0	0	4	0.285714	5.06766	0	0.009213	1.47627	6.55314	2.91958	0.773318	0	0.001406	0.225277	0.627215	301.5	307.5	307.8	306.9	4.5	27
ILMN_1255479	Cldn2	Mus musculus claudin 2 (Cldn2), mRNA.	5.11736	12.9313	2.32854	2.35996	-1.24922	1.04194	1.14905	1.58145	-1.36198	1.24525	1.00797	1.07613	1.00603	-1.29897	1	1	0	0	0	0	0	0	0	0	0	0	0	0	2	0.142857	0	0	0	0.473114	0.473114	1.01711	0	0	0	1	0.65222	204.3	206.3	206.4	206.1	5.56	27
ILMN_2466335	Apaf1	Mus musculus apoptotic peptidase activating factor 1 (Apaf1), transcript variant 1, mRNA.	5.11098	4.8071	11.375	9.39843	6.57924	1.80669	7.80923	5.20185	2.57394	18.0981	7.36278	-1.26863	5.84769	7.1576	0	0	1	1	1	0	1	0	0	1	0	0	0	0	5	0.357143	1.38828	0	0	1.74942	3.1377	3.3439	0.442452	0	0	0.557548	0.610771	313.6	317.6	317.8	317.2	4.55	27
ILMN_2600678	Rac2	Mus musculus RAS-related C3 botulinum substrate 2 (Rac2), mRNA.	5.11009	31.5784	50.8473	18.6634	4.59709	9.07486	10.5219	14.0617	1.509	45.4025	20.8572	3.79088	10.7741	7.1133	0	1	1	1	0	0	0	0	0	1	1	0	0	0	5	0.357143	0	0	0.195322	3.37677	3.57209	6.68439	0	0	0.05468	0.94532	0.640805	370.3	374.3	374.4	373.8	4.66	27
ILMN_2531737	LOC240672		5.10877	19.1809	8.23161	8.30673	3.06023	2.40561	13.4087	2.91819	1.15964	6.05139	5.11594	2.5585	7.27661	4.77298	0	1	0	1	0	0	1	0	0	0	0	0	0	0	3	0.214286	0	0	0	2.01221	2.01221	3.34253	0	0	0	1	0.548498	323.9	325.9	325.9	325.7	3.64	27
ILMN_1224915	A930006A19Rik		5.10063	6.21175	4.78344	2.53819	4.07986	2.27659	2.88378	2.56267	2.63256	6.37931	6.06129	1.74927	1.35238	1.73934	0	0	0	0	0	0	0	0	0	0	1	0	0	0	1	0.0714286	0	0	0	1.1858	1.1858	1.84169	0	0	0	1	0.517102	281.1	283.1	283.1	282.8	3.21	27
ILMN_1250688	Fat1	Mus musculus FAT tumor suppressor homolog 1 (Drosophila) (Fat1), mRNA.	5.09939	11.199	7.6186	8.37286	7.91385	4.3541	7.87413	8.16442	4.23407	13.127	7.29686	3.28598	6.20157	6.2564	1	1	1	1	1	0	1	1	1	1	1	0	1	1	12	0.857143	0.235318	0	0	0.951332	1.18665	2.907	0.198305	0	0	0.801695	0.756443	260.7	264.7	264.8	264.2	8.97	27
ILMN_2818294	Srpx2	Mus musculus sushi-repeat-containing protein, X-linked 2 (Srpx2), mRNA.	5.09851	13.2143	15.9272	7.7292	6.64542	5.71271	8.71862	9.49817	5.04992	20.3996	11.3133	4.5519	12.0389	6.3619	0	0	1	0	0	0	0	0	0	1	0	0	0	0	2	0.142857	0.439215	0	0	2.47367	2.91288	4.81661	0.150784	0	0	0.849216	0.616216	341	345	345.1	344.5	4.55	27
ILMN_2846776	Cdkn1a	Mus musculus cyclin-dependent kinase inhibitor 1A (P21) (Cdkn1a), mRNA.	5.09294	7.23437	13.7528	15.3604	4.59142	2.34169	8.00655	2.69895	5.70885	17.131	5.0318	1.7738	3.98469	2.15919	0	0	1	1	0	0	1	0	1	1	0	0	0	0	5	0.357143	0.009894	0	0	1.4123	1.4222	2.99776	0.006957	0	0	0.993043	0.646731	295.2	299.2	299.4	298.8	5.46	27
ILMN_2705578	Snx30	Mus musculus sorting nexin family member 30 (Snx30), mRNA.	5.08712	11.1427	6.00047	5.59051	4.18805	2.64488	6.79494	8.06039	3.29138	5.66261	7.57581	2.8357	7.9679	1.35071	0	1	0	0	0	0	1	1	0	0	0	0	0	0	3	0.214286	0	0	0.049274	1.80286	1.85213	3.05163	0	0	0.026604	0.973396	0.568405	317.1	321.1	321.3	320.7	3.66	27
ILMN_2430704	Ttpal	Mus musculus tocopherol (alpha) transfer protein-like (Ttpal), transcript variant 1, mRNA.	5.08413	2.44664	5.56083	3.94537	1.77104	1.94835	1.87795	1.94598	2.81322	11.6919	4.10391	-1.11187	4.79756	7.68662	0	0	0	0	0	0	0	0	0	1	0	0	0	0	1	0.0714286	0	0	0	1.56869	1.56869	2.22867	0	0	0	1	0.472099	303.7	305.7	305.8	305.5	2.68	27
ILMN_2426335	6720477C19Rik		5.08104	14.9555	1.23941	4.71403	3.03038	1.1124	1.97422	1.43242	2.22445	4.52798	4.6286	4.98261	2.54388	2.34659	0	1	0	0	0	0	0	0	0	0	0	0	0	0	1	0.0714286	1.51281	0	0.157751	1.75595	3.42651	2.88998	0.441502	0	0.046038	0.512459	0.582168	320.6	326.6	326.9	325.9	2.45	27
ILMN_2975892	Dnase2a	Mus musculus deoxyribonuclease II alpha (Dnase2a), mRNA.	5.077	5.89844	5.91734	4.52871	2.96374	-1.23842	2.95586	2.71533	3.31924	4.13982	9.54917	-3.00495	3.17348	4.18625	0	0	0	0	0	0	0	0	0	0	1	0	0	0	1	0.0714286	3.25813	0	0.372644	1.52359	5.15436	2.77649	0.632111	0	0.072297	0.295592	0.659258	319	325	325.3	324.4	3.11	27
ILMN_3161652	Clec4a3	Mus musculus C-type lectin domain family 4, member a3 (Clec4a3), mRNA.	5.06961	15.1653	65.9808	38.0588	8.26492	13.4413	16.407	11.4552	2.05221	19.6061	26.5626	7.3985	18.9081	6.03227	0	0	1	1	0	0	1	0	0	0	1	0	0	0	4	0.285714	0	0	0	3.82622	3.82622	7.40027	0	0	0	1	0.612221	375.9	377.9	378	377.7	4.74	27
ILMN_2740852	F2r	Mus musculus coagulation factor II (thrombin) receptor (F2r), mRNA.	5.06724	6.4173	3.47376	5.53852	3.59039	3.1291	4.61535	3.9478	4.03817	5.23746	3.33474	2.03524	3.01864	4.36311	1	1	0	1	1	0	1	1	1	1	0	0	0	1	9	0.642857	0.099649	0	0	0.710778	0.810427	1.70109	0.122959	0	0	0.877041	0.687576	239.9	243.9	244	243.5	6.44	27
ILMN_2755667	Apbb1ip		5.05908	32.7767	25.1446	15.5532	10.4815	8.8784	13.6681	10.0196	3.15128	55.5546	14.3053	3.76252	7.63062	8.34946	0	1	1	1	1	0	1	0	0	1	1	0	0	0	7	0.5	0	0	0	2.55856	2.55856	5.73256	0	0	0	1	0.66526	343.3	345.3	345.4	345.1	5.96	27
ILMN_2750515	Fos	Mus musculus FBJ osteosarcoma oncogene (Fos), mRNA.	5.05067	7.59526	12.9134	8.02466	4.09113	-1.02651	8.27386	1.85845	2.19364	27.0758	3.895	-2.62927	4.9664	2.65404	0	0	1	1	0	0	1	0	0	1	0	0	0	0	4	0.285714	0.687601	0	0.111072	1.38886	2.18753	2.87279	0.314328	0	0.050775	0.634897	0.664437	300.6	306.6	306.9	305.9	4.8	27
ILMN_1235602	D0Kist3		5.05041	12.5946	9.70128	7.94683	4.46432	2.1405	3.06099	1.45128	3.86572	4.38021	4.48094	3.05723	6.16072	4.64162	0	1	1	1	0	0	0	0	0	0	0	0	0	0	3	0.214286	3.33746	0	0.07171	1.59465	5.00382	3.10038	0.666982	0	0.014331	0.318687	0.633785	310.2	316.2	316.6	315.6	4.41	27
ILMN_1213986	LOC380617		5.04315	7.94107	11.5017	5.83713	5.85261	1.0305	3.1947	1.11971	3.68058	17.8572	7.96487	-1.29755	4.38659	3.88554	0	0	1	1	1	0	0	0	0	1	1	0	0	0	5	0.357143	0.944893	0	0	1.50496	2.44985	2.88879	0.385694	0	0	0.614306	0.612144	301.3	305.3	305.4	304.8	4.18	27
ILMN_2623280	Osmr	Mus musculus oncostatin M receptor (Osmr), mRNA.	5.03773	4.81277	5.8168	5.64589	3.34577	2.06852	5.23257	3.31728	2.02791	4.88559	3.08977	1.52834	2.50643	3.83192	1	1	1	1	1	0	1	0	0	1	0	0	0	1	8	0.571429	0.250217	0	0	0.607152	0.857369	1.47495	0.291842	0	0	0.708158	0.694115	224.9	228.9	229.1	228.5	6.58	27
ILMN_3009792	Aim2	Mus musculus absent in melanoma 2 (Aim2), mRNA.	5.0366	3.20435	6.09067	2.93573	4.49238	2.14448	4.07116	3.62737	2.22082	17.4659	4.90414	3.87242	4.16977	4.26459	0	0	0	0	0	0	0	0	0	1	0	0	0	0	1	0.0714286	0	0	0.09272	2.1232	2.21592	2.99399	0	0	0.041843	0.958157	0.489532	331.6	335.6	335.8	335.2	2.48	27
ILMN_3115796	Cd40	Mus musculus CD40 antigen (Cd40), transcript variant 5, mRNA.	5.03093	6.6579	24.7847	2.97812	4.454	2.30897	6.04466	8.62605	2.70905	6.84176	5.33625	15.0692	5.56417	3.96204	0	0	1	0	0	0	0	0	0	0	0	0	0	0	1	0.0714286	0	0	0	2.5574	2.5574	4.16114	0	0	0	1	0.539057	343.3	345.3	345.4	345.1	3.51	27
ILMN_2721337	G6pdx	Mus musculus glucose-6-phosphate dehydrogenase X-linked (G6pdx), mRNA.	5.02997	3.10968	6.09183	2.7808	2.81337	2.2486	4.61158	6.44297	1.57087	3.02535	5.06487	-1.31576	1.90057	1.50105	0	0	1	0	0	0	0	1	0	0	0	0	0	0	2	0.142857	0	0	0	1.35457	1.35457	1.90381	0	0	0	1	0.466372	291.8	293.8	293.9	293.6	2.62	27
ILMN_2587721	Pira1	Mus musculus paired-Ig-like receptor A1 (Pira1), mRNA.	5.02074	7.22985	11.5829	11.2234	3.3258	5.31843	8.9033	2.76523	1.58672	9.52487	5.80009	8.50326	9.1688	1.13296	0	0	1	1	0	0	1	0	0	0	0	0	0	0	3	0.214286	0.031894	0	0	1.87871	1.91061	3.38978	0.016693	0	0	0.983307	0.584524	318.4	322.4	322.5	322	4.18	27
ILMN_2830661	Top2a	Mus musculus topoisomerase (DNA) II alpha (Top2a), mRNA.	5.00276	10.5912	7.41039	14.3206	3.3293	1.65959	7.02082	3.91015	3.30352	8.98488	6.45761	2.50247	3.10975	1.48622	0	0	0	1	0	0	1	0	0	0	0	0	0	0	2	0.142857	0	0	0	1.85195	1.85195	3.05555	0	0	0	1	0.545429	317.2	319.2	319.2	319	3.6	27
ILMN_2974720	Igf2bp2	Mus musculus insulin-like growth factor 2 mRNA binding protein 2 (Igf2bp2), mRNA.	4.99973	12.1473	6.44062	6.74136	3.87238	3.92148	5.1566	1.79692	2.16322	10.4416	4.20899	1.10633	2.99897	5.44104	0	1	1	1	0	0	1	0	0	1	0	0	0	0	5	0.357143	0	0	0	1.25229	1.25229	2.36182	0	0	0	1	0.602333	285.5	287.5	287.5	287.3	4.54	27
ILMN_1216394	Pdcd6ip	Mus musculus programmed cell death 6 interacting protein (Pdcd6ip), mRNA.	4.98857	2.65725	2.97054	5.51331	1.65034	1.65508	1.36864	2.88626	-1.09794	5.59123	1.84178	-1.74729	1.85686	3.44925	0	0	0	1	0	0	0	0	0	0	0	0	0	0	1	0.0714286	0	0	0	1.41885	1.41885	1.79993	0	0	0	1	0.408788	295.6	297.6	297.6	297.4	2.07	27
ILMN_2584915	C130085D15Rik		4.9801	36.7702	5.96263	5.09076	4.84078	1.45922	4.28133	2.75514	4.28389	6.91374	12.8732	3.74816	5.3724	7.77591	0	1	0	0	0	0	0	0	0	0	1	0	0	0	2	0.142857	0	0	0.142684	1.94737	2.09006	3.58866	0	0	0.068268	0.931732	0.619093	326.8	330.8	330.9	330.4	4.05	27
ILMN_1227951	Gcnt2	Mus musculus glucosaminyl (N-acetyl) transferase 2, I-branching enzyme (Gcnt2), transcript variant 3, mRNA.	4.97941	5.73383	4.44182	4.0218	1.63026	2.06558	3.30997	2.11649	2.22628	3.19725	2.30921	1.3917	2.85106	2.81773	1	1	1	1	0	0	1	0	0	1	0	0	0	1	7	0.5	0.044474	0	0	0.371524	0.415997	1.0243	0.106909	0	0	0.893091	0.728702	187.3	191.3	191.5	190.9	7.68	27
ILMN_2687062	Abr	Mus musculus active BCR-related gene (Abr), transcript variant 2, mRNA.	4.97613	3.13797	6.29279	11.4221	4.4625	2.75046	11.7289	3.33307	3.57341	5.74989	5.70677	1.68375	5.47351	2.77407	1	0	1	1	0	0	1	0	0	0	1	0	0	0	5	0.357143	0	0	0.310707	1.05913	1.36983	2.65601	0	0	0.226821	0.773179	0.757611	287.4	291.4	291.5	290.9	5.81	27
ILMN_2810405	Myo1g	Mus musculus myosin IG (Myo1g), mRNA.	4.97027	29.9351	48.4727	12.1479	6.53506	2.47517	9.62162	6.62353	4.65805	30.4014	14.1723	3.22829	8.59084	13.6277	0	1	1	1	0	0	0	0	0	1	0	0	0	0	4	0.285714	0.25723	0	0	2.96278	3.22001	5.57923	0.079885	0	0	0.920115	0.602551	355.4	359.4	359.6	359	4.5	27
ILMN_1213376	Cfl1	Mus musculus cofilin 1, non-muscle (Cfl1), mRNA.	4.9701	25.1038	19.8322	18.9001	3.44776	2.32221	5.17328	2.70424	2.5794	16.9412	5.0661	3.39485	5.81361	6.85576	0	1	1	1	0	0	0	0	0	1	0	0	0	0	4	0.285714	0	0	0.064283	2.40612	2.4704	4.31634	0	0	0.026021	0.973979	0.592531	340.5	344.5	344.6	344.1	4.05	27
ILMN_1255766	Sh3bp2	Mus musculus SH3-domain binding protein 2 (Sh3bp2), mRNA.	4.96726	5.22247	10.5225	5.30687	4.22878	2.60765	5.88197	3.71922	2.7259	11.499	6.29835	1.66898	5.87993	3.00761	0	0	1	1	0	0	1	0	0	1	1	0	0	0	5	0.357143	0	0	0	1.11834	1.11834	2.33293	0	0	0	1	0.64047	276.3	278.3	278.4	278.1	5.34	27
ILMN_1243921	5330431K02Rik		4.96502	13.2685	2.16824	3.90981	3.18784	1.43197	1.68231	1.35212	1.22939	2.805	4.9795	3.29367	3.57192	10.8601	0	1	0	0	0	0	0	0	0	0	0	0	0	1	2	0.142857	1.95699	0.048689	0	1.71403	3.7197	3.27257	0.526114	0.013089	0	0.460797	0.617678	314	320	320.3	319.4	3.54	27
ILMN_3072337	Cpne8	Mus musculus copine VIII (Cpne8), transcript variant 2, mRNA.	4.95874	2.62916	8.33467	4.3101	3.01505	2.31932	2.80784	1.88658	1.65289	3.25029	5.1852	1.1691	-1.03761	3.86473	0	0	1	0	0	0	0	0	0	0	0	0	0	0	1	0.0714286	0	0	0	1.72149	1.72149	2.21606	0	0	0	1	0.417384	311.2	313.2	313.3	313	2.15	27
ILMN_2737302	Cxcl12	Mus musculus chemokine (C-X-C motif) ligand 12 (Cxcl12), transcript variant 1, mRNA.	4.95368	3.89026	7.19702	5.53177	1.73736	1.70441	2.79142	4.01521	2.23345	4.75958	2.54921	6.10966	2.3512	2.81032	0	0	1	1	0	0	0	0	0	0	0	0	0	0	2	0.142857	0.253293	0	0	1.34705	1.60034	2.35921	0.158274	0	0	0.841726	0.573383	291.7	295.7	295.9	295.3	3.41	27
ILMN_2617835	Myo9b	Mus musculus myosin IXb (Myo9b), mRNA.	4.94579	8.759	7.98615	4.78162	6.28712	2.92756	5.1491	4.03628	3.41398	10.9741	7.34112	2.51882	5.8554	4.31856	0	1	1	1	1	0	1	0	0	1	1	0	0	0	7	0.5	0	0	0	1.20763	1.20763	2.4607	0	0	0	1	0.631924	282.5	284.5	284.6	284.3	5.15	27
ILMN_1260404	Nol3	Mus musculus nucleolar protein 3 (apoptosis repressor with CARD domain) (Nol3), mRNA.	4.93996	11.0107	16.2003	5.75374	7.04764	2.86721	4.38191	5.88585	3.68467	5.7398	6.44319	2.43551	3.09892	5.21963	0	1	1	1	1	0	0	1	0	0	1	0	0	0	6	0.428571	4.83899	0	0.249901	1.30093	6.38982	3.10485	0.757296	0	0.039109	0.203595	0.732111	303.8	309.8	310.1	309.1	5.41	27
ILMN_1221646	Lmna	Mus musculus lamin A (Lmna), transcript variant 1, mRNA.	4.92637	40.1557	3.65153	6.33726	3.15456	2.19098	4.01901	3.71452	1.38917	5.83392	3.10884	2.01056	1.03247	5.0806	0	1	0	1	0	0	0	0	0	0	0	0	0	0	2	0.142857	0	0	0	1.5294	1.5294	2.73227	0	0	0	1	0.580184	301.7	303.7	303.7	303.5	4.15	27
ILMN_1252642	D330001D04Rik		4.9262	8.662	3.84045	2.84333	2.85442	-1.187	3.36177	1.65456	1.97864	3.14167	5.82699	1.94066	3.17224	4.91198	1	1	0	0	0	0	0	0	0	0	1	0	0	0	3	0.214286	1.09604	0.011441	0.432808	1.02616	2.56645	2.62025	0.427066	0.004458	0.168641	0.399835	0.776292	295.6	303.6	304.1	302.8	3.65	27
ILMN_1217458	8430403J19Rik		4.92569	28.7741	5.11541	7.07348	4.39536	2.0313	6.1469	3.00627	2.51329	12.3195	7.14322	3.23698	17.05	2.47441	0	1	0	1	0	0	0	0	0	1	0	0	1	0	4	0.285714	0	0	0.031518	1.82658	1.8581	3.41931	0	0	0.016962	0.983038	0.60604	317.4	321.4	321.6	321	4.41	27
ILMN_1235363	Gsg2	Mus musculus germ cell-specific gene 2 (Gsg2), mRNA.	4.92569	3.84958	4.09092	7.47275	4.1229	1.10786	3.84318	1.42697	1.54174	5.36644	3.21735	1.40218	3.87465	1.25439	1	0	0	1	1	0	0	0	0	0	0	0	0	0	3	0.214286	0	0	0.1321	1.02828	1.16038	1.91642	0	0	0.113842	0.886158	0.638883	278.8	282.8	282.9	282.4	3.87	27
ILMN_1231138	E2f1	Mus musculus E2F transcription factor 1 (E2f1), mRNA.	4.92185	11.8512	93.3223	15.2744	8.27455	6.99901	7.83352	12.9484	3.80376	63.6799	16.1311	1.0344	16.1568	28.9261	0	0	1	1	0	0	0	0	0	1	1	0	0	1	5	0.357143	0	0	0	2.97354	2.97354	6.27047	0	0	0	1	0.64434	355.5	357.5	357.6	357.3	5.44	27
ILMN_2715042	Sdc3	Mus musculus syndecan 3 (Sdc3), mRNA.	4.91103	9.02921	7.34837	9.04926	4.07195	3.38235	5.48556	4.91673	3.08543	12.6843	6.39425	2.58955	4.00416	5.13225	0	1	1	1	0	0	1	0	0	1	1	0	0	0	6	0.428571	0.088765	0	0	1.14379	1.23256	2.56362	0.072017	0	0	0.927983	0.666012	278.3	282.3	282.5	281.9	5.88	27
ILMN_2865016	Cd83	Mus musculus CD83 antigen (Cd83), mRNA.	4.90805	7.74161	41.8992	8.10122	5.78782	3.72135	6.61298	9.46679	8.84747	45.6961	23.4684	4.34328	6.35577	7.53	0	0	1	0	0	0	0	0	0	1	1	0	0	0	3	0.214286	0	0	0	3.61413	3.61413	6.54017	0	0	0	1	0.585546	371.3	373.3	373.4	373.1	4.24	27
ILMN_3160107	Pik3r6	Mus musculus phosphoinositide-3-kinase, regulatory subunit 6 (Pik3r6), transcript variant 2, mRNA.	4.8959	2.24269	4.34423	18.6924	2.24772	2.20026	4.75854	1.2193	1.3569	6.49952	5.02831	3.60093	1.02788	5.95913	0	0	0	1	0	0	0	0	0	0	0	0	0	0	1	0.0714286	0	0	0.007509	1.30482	1.31233	2.38691	0	0	0.005722	0.994278	0.592341	289.3	293.3	293.4	292.8	4.29	27
ILMN_1258916	Atp13a3	PREDICTED: Mus musculus ATPase type 13A3, transcript variant 1 (Atp13a3), mRNA.	4.89582	2.82379	6.01515	6.72568	6.75099	1.49547	6.75774	2.74561	1.30411	1.67377	-1.01656	1.43257	2.99966	-1.66011	1	0	1	1	1	0	1	0	0	0	0	0	0	0	5	0.357143	0.07125	0	0.072971	1.02205	1.16627	1.89263	0.061092	0	0.062567	0.876341	0.620907	274.6	280.6	280.9	279.9	3.82	27
ILMN_2524102	Zswim6		4.89277	2.72489	4.59121	1.95212	2.95173	1.26846	2.36897	3.86428	2.384	4.39237	2.02448	-1.57467	2.50301	-1.06023	1	0	1	0	0	0	0	0	0	0	0	0	0	0	2	0.142857	0	0	0	0.936507	0.936507	1.46757	0	0	0	1	0.521398	261.9	263.9	264	263.7	3.27	27
ILMN_2503553	Col8a1	Mus musculus collagen, type VIII, alpha 1 (Col8a1), mRNA.	4.88827	9.88084	7.94089	17.7745	12.0625	16.9451	15.1758	11.9187	4.91007	7.22551	5.26433	3.82984	9.68599	14.8973	0	0	0	1	1	1	1	1	0	0	0	0	0	1	6	0.428571	0	0	0	2.01013	2.01013	4.48136	0	0	0	1	0.663585	323.8	325.8	325.9	325.6	5.92	27
ILMN_2816180	Lbh	Mus musculus limb-bud and heart (Lbh), mRNA.	4.88624	5.60417	4.76409	5.18297	2.76014	3.0188	4.13538	4.23174	3.46363	8.8128	4.60587	1.99158	3.25645	5.75484	1	0	1	1	0	0	1	0	0	1	0	0	0	1	6	0.428571	0	0	0	0.982746	0.982746	1.95633	0	0	0	1	0.623244	265.8	267.8	267.9	267.6	4.96	27
ILMN_2581402	E330009F12Rik		4.88489	6.04412	3.26476	3.16065	4.87222	-1.45302	2.76546	1.72868	2.34376	7.78646	5.8281	1.90899	2.37008	1.1452	1	1	0	0	1	0	0	0	0	1	1	0	0	0	5	0.357143	0.335083	0	0.015751	0.80382	1.15465	1.63492	0.290202	0	0.013642	0.696156	0.640342	251.8	257.8	258.1	257.2	4.77	27
ILMN_1216341	Dchs1	PREDICTED: Mus musculus dachsous 1 (Drosophila) (Dchs1), mRNA.	4.88396	11.8305	1.31791	2.37937	2.28612	3.62329	1.69215	3.64672	4.19551	10.1256	1.18073	-1.37819	3.44149	4.83578	1	1	0	0	0	0	0	0	1	1	0	0	0	0	4	0.285714	0	0.013394	0	0.950428	0.963822	1.90365	0	0.013897	0	0.986103	0.629649	264.1	268.1	268.3	267.7	4.97	27
ILMN_3162407	Zfp36	Mus musculus zinc finger protein 36 (Zfp36), mRNA.	4.86959	9.03318	6.55866	4.59116	2.51923	1.44556	5.75589	3.05321	2.38099	9.18555	4.25144	1.27794	4.11189	2.51939	1	1	1	1	0	0	1	0	0	1	1	0	0	0	7	0.5	0	0	0	0.856204	0.856204	1.81319	0	0	0	1	0.645843	254.7	256.7	256.7	256.5	5.47	27
ILMN_2640971	Pafah1b3	Mus musculus platelet-activating factor acetylhydrolase, isoform 1b, alpha1 subunit (Pafah1b3), mRNA.	4.8652	5.33492	10.544	4.79284	4.61637	3.93462	7.00255	10.0272	5.59286	10.4573	5.2463	1.83386	6.7446	6.79324	0	0	1	0	0	0	1	1	0	0	0	0	0	0	3	0.214286	0	0	0	1.8541	1.8541	3.42479	0	0	0	1	0.593968	317.3	319.3	319.3	319.1	4.39	27
ILMN_2589741	Tmem51	Mus musculus transmembrane protein 51 (Tmem51), mRNA.	4.85771	7.32198	12.7792	8.64209	3.33637	4.05661	5.24114	4.42453	2.78633	12.2669	7.13506	1.98701	4.05593	5.28395	0	1	1	1	0	0	1	0	0	1	1	0	0	0	6	0.428571	0	0	0	1.1847	1.1847	2.62128	0	0	0	1	0.661034	281	283	283	282.8	5.85	27
ILMN_2749448	Plekho2	Mus musculus pleckstrin homology domain containing, family O member 2 (Plekho2), mRNA.	4.85543	15.4464	9.61076	9.38945	4.74326	4.12002	7.86703	8.39221	3.97933	16.8106	8.4209	3.68645	8.23899	5.40071	0	1	1	1	0	0	1	1	0	1	1	0	0	0	7	0.5	0	0	0	1.6127	1.6127	3.49792	0	0	0	1	0.654217	306	308	308	307.8	5.68	27
ILMN_1213947	Slc25a24	Mus musculus solute carrier family 25 (mitochondrial carrier, phosphate carrier), member 24 (Slc25a24), nuclear gene encoding mitochondrial protein, mRNA.	4.85333	22.5299	20.7422	3.11446	1.33999	2.19836	2.36507	3.44607	4.32052	7.2563	3.82789	4.14211	3.06616	3.07826	0	1	1	0	0	0	0	0	0	0	0	0	0	0	2	0.142857	0	0	0	1.77667	1.77667	2.9755	0	0	0	1	0.552176	313.8	315.8	315.9	315.6	3.7	27
ILMN_1221311	Ttyh3	Mus musculus tweety homolog 3 (Drosophila) (Ttyh3), mRNA.	4.84879	15.6707	7.87893	2.21895	3.02032	5.08439	5.75885	11.4219	5.8843	88.0855	20.034	3.90115	5.34047	6.20024	0	0	0	0	0	0	0	0	0	1	1	0	0	0	2	0.142857	0	0	0	3.36163	3.36163	5.35684	0	0	0	1	0.529344	365.5	367.5	367.5	367.3	3.37	27
ILMN_3008859	Ctsc	Mus musculus cathepsin C (Ctsc), mRNA.	4.84829	4.69416	11.4929	9.52012	4.79224	2.60548	3.31337	3.13964	1.69693	9.2134	4.04468	3.28661	4.13915	2.26012	0	0	1	1	0	0	0	0	0	0	0	0	0	0	2	0.142857	0	0	0	1.6847	1.6847	2.70586	0	0	0	1	0.533042	309.5	311.5	311.6	311.3	3.42	27
ILMN_2883392	S100a11	Mus musculus S100 calcium binding protein A11 (calgizzarin) (S100a11), mRNA.	4.84728	6.52435	10.5037	6.09607	3.77182	2.35308	7.13721	5.15608	2.58639	11.1763	5.98261	2.15308	5.215	4.28667	1	1	1	1	0	0	1	1	0	1	1	0	0	0	8	0.571429	0.748737	0	0	1.01732	1.76606	2.38623	0.42396	0	0	0.57604	0.682748	269.6	273.6	273.8	273.2	6.22	27
ILMN_1256085	Il10rb		4.84719	9.55706	6.05699	4.25636	2.31932	1.01203	4.16264	-1.00542	1.62767	7.90501	3.91619	2.17513	1.40578	1.06518	0	1	1	1	0	0	1	0	0	1	0	0	0	0	5	0.357143	0	0	0	1.04941	1.04941	1.79961	0	0	0	1	0.562652	271.2	273.2	273.2	272.9	3.86	27
ILMN_2730329	Hist1h2ah	Mus musculus histone cluster 1, H2ah (Hist1h2ah), mRNA.	4.84677	45.4928	69.9014	22.8164	3.65918	5.08607	17.1536	18.2706	2.24036	44.5628	6.58336	2.49237	15.7826	19.6526	0	1	1	1	0	0	1	0	0	1	0	0	0	0	5	0.357143	0	0	0	3.73226	3.73226	7.25321	0	0	0	1	0.614075	373.9	375.9	376	375.7	4.77	27
ILMN_1232716	Cyp1b1	Mus musculus cytochrome P450, family 1, subfamily b, polypeptide 1 (Cyp1b1), mRNA.	4.83009	5.52446	8.07045	1.58638	-1.08047	-1.58818	1.06956	1.28038	-1.95416	4.37981	2.1411	2.94431	-2.05404	2.68186	0	0	1	0	0	0	0	0	0	0	0	0	0	0	1	0.0714286	0	0	0.341956	1.61269	1.95464	2.39161	0	0	0.174945	0.825055	0.570067	320.3	324.3	324.5	323.9	2.01	27
ILMN_2887986	Cd300a	Mus musculus CD300A antigen (Cd300a), mRNA.	4.82632	4.94544	2.17407	2.17471	2.97919	2.02897	3.41167	1.53265	2.07952	5.76332	3.8255	1.44113	4.23903	1.10525	1	0	0	0	0	0	0	0	0	0	0	0	0	0	1	0.0714286	0	0	0	1.03137	1.03137	1.52998	0	0	0	1	0.494423	269.8	271.8	271.8	271.5	2.93	27
ILMN_2705604	Ppp1r15b		4.82123	8.31222	2.63582	5.52035	2.68429	-1.03122	5.74959	4.82064	2.52167	2.37062	2.6728	-1.1873	2.10492	2.25259	0	0	0	1	0	0	1	0	0	0	0	0	0	0	2	0.142857	0	0	0	1.47273	1.47273	2.16021	0	0	0	1	0.488685	298.6	300.6	300.7	300.4	2.87	27
ILMN_1255731	Dnm3os	Mus musculus dynamin 3, opposite strand (Dnm3os), non-coding RNA.	4.81989	2.41346	3.11391	2.6293	2.77679	1.92239	3.36573	4.54853	2.23486	4.99852	3.69046	1.61036	3.45288	3.72451	1	0	0	0	0	0	0	0	0	0	0	0	0	0	1	0.0714286	0.220359	0	0	0.973282	1.19364	1.61495	0.184611	0	0	0.815389	0.549926	265.5	269.5	269.6	269.1	3.3	27
ILMN_2632712	Birc5	Mus musculus baculoviral IAP repeat-containing 5 (Birc5), transcript variant 1, mRNA.	4.81213	12.0461	8.8128	12.521	5.897	5.19599	11.1428	3.90379	5.13764	40.311	5.63377	3.8717	5.47048	9.37526	0	0	0	1	0	0	1	0	0	1	0	0	0	0	3	0.214286	0	0	0	2.45708	2.45708	4.63411	0	0	0	1	0.602337	340.1	342.1	342.1	341.9	4.54	27
ILMN_2595597	Anln	Mus musculus anillin, actin binding protein (Anln), mRNA.	4.80671	7.20567	21.3946	19.2014	7.03758	6.30797	11.5718	9.55546	3.29479	10.9784	5.0547	1.02585	3.94502	13.3654	0	0	1	1	0	0	1	0	0	0	0	0	0	0	3	0.214286	0	0	0	2.73436	2.73436	4.65364	0	0	0	1	0.55932	348.7	350.7	350.8	350.5	3.81	27
ILMN_2693991	Gpr65	Mus musculus G-protein coupled receptor 65 (Gpr65), mRNA.	4.79764	3.42499	5.2947	3.18303	4.27469	2.87936	1.80896	1.09895	3.31153	5.89762	4.8239	1.08879	5.35332	9.58817	0	0	0	0	0	0	0	0	0	0	0	0	0	1	1	0.0714286	2.22861	0	0.206898	1.38847	3.82397	2.37395	0.582799	0	0.054105	0.363095	0.615122	305.8	311.8	312.1	311.2	3.16	27
ILMN_2894211	8430408G22Rik	Mus musculus RIKEN cDNA 8430408G22 gene (8430408G22Rik), mRNA.	4.79357	3.75141	1.60484	2.71603	2.74229	3.35503	2.70754	3.0438	7.21958	2.38568	1.62355	1.45209	2.09212	1.8264	1	0	0	0	0	0	0	0	1	0	0	0	0	0	2	0.142857	0	0	0	0.686065	0.686065	1.29939	0	0	0	1	0.604006	236.7	238.7	238.8	238.5	4.58	27
ILMN_2772410	Anxa4		4.79241	3.63923	14.205	8.03646	6.58544	3.74243	8.09393	2.729	4.08647	11.8957	4.31116	1.46079	3.34244	10.4861	0	0	1	1	0	0	1	0	0	0	0	0	0	0	3	0.214286	0	0	0	2.19193	2.19193	3.64807	0	0	0	1	0.549364	330.8	332.8	332.9	332.6	3.66	27
ILMN_1238535	4832420L08Rik		4.78801	4.4507	9.2649	3.15251	1.94345	1.54226	2.90537	3.44792	2.02287	12.5684	3.6865	1.37813	8.0037	3.86708	0	0	1	0	0	0	0	0	0	1	0	0	0	0	2	0.142857	3.5152	0.00199	0.347005	1.69691	5.56111	2.83717	0.632104	0.000358	0.062399	0.305139	0.620346	325.6	333.6	334.1	332.8	2.65	27
ILMN_2689731	Dusp4	Mus musculus dual specificity phosphatase 4 (Dusp4), mRNA.	4.78038	5.57627	19.4628	8.48821	9.48324	3.65108	7.99734	11.2582	11.7164	7.24089	10.7644	1.75602	9.31808	1.97397	0	0	1	1	1	0	1	1	1	0	1	0	0	0	7	0.5	4.54858	0.002482	0.118335	2.06398	6.73337	4.17019	0.675528	0.000369	0.017574	0.306529	0.651686	332.2	340.2	340.7	339.3	4.75	27
ILMN_2698728	Srpx2	Mus musculus sushi-repeat-containing protein, X-linked 2 (Srpx2), transcript variant 2, mRNA.	4.77756	6.49637	7.38373	6.04348	4.63401	5.3405	7.42021	6.53336	3.85094	12.7545	6.12921	2.24634	7.22585	5.65323	0	1	1	1	1	1	1	1	0	1	1	0	1	0	10	0.714286	0.126849	0	0	1.08278	1.20963	2.63707	0.104866	0	0	0.895134	0.692867	273.9	277.9	278.1	277.5	6.63	27
ILMN_2776327	Rps6ka1	Mus musculus ribosomal protein S6 kinase polypeptide 1 (Rps6ka1), mRNA.	4.76921	10.5827	11.6991	5.36516	5.64127	2.72678	3.69758	2.35904	3.35834	12.8474	4.41588	2.31191	3.53098	3.59395	0	0	1	0	0	0	0	0	0	1	0	0	0	0	2	0.142857	0.227791	0	0.060927	1.95289	2.24161	3.09416	0.101619	0	0.02718	0.871201	0.541683	324.1	330.1	330.5	329.5	3.08	27
ILMN_2628271	LOC100045967	PREDICTED: Mus musculus hypothetical protein LOC100045967 (LOC100045967), misc RNA.	4.76425	5.1072	5.90771	6.37551	3.73855	2.74684	5.50301	3.51019	3.4953	6.48542	4.40854	1.87659	4.34152	3.98856	1	1	1	1	1	0	1	0	0	1	1	0	0	0	8	0.571429	0	0	0	0.817248	0.817248	1.87433	0	0	0	1	0.672984	250.9	252.9	253	252.7	6.17	27
ILMN_1233693	Slc30a7	Mus musculus solute carrier family 30 (zinc transporter), member 7 (Slc30a7), mRNA.	4.75815	9.95347	7.91451	9.7757	3.26567	2.70762	5.70869	8.42791	1.27119	15.674	4.02887	4.71508	4.84904	2.19281	0	1	1	1	0	0	1	1	0	1	0	0	0	0	6	0.428571	0	0	0	1.49398	1.49398	2.89976	0	0	0	1	0.613593	299.8	301.8	301.8	301.6	4.76	27
ILMN_1212734	Fgd6		4.75287	3.85492	9.94382	3.92589	3.10872	4.97053	3.54224	3.34992	1.7072	2.67839	1.92602	-1.82861	2.23902	2.79295	0	0	1	0	0	0	0	0	0	0	0	0	0	0	1	0.0714286	0	0	0	1.70888	1.70888	2.52166	0	0	0	1	0.491741	310.7	312.7	312.7	312.4	2.9	27
ILMN_3029727	Shf	Mus musculus Src homology 2 domain containing F (Shf), mRNA.	4.75205	10.057	3.50825	1.92716	5.18046	1.61208	3.68024	4.7467	2.32317	4.47049	2.02746	-2.26729	3.98303	4.20171	0	1	0	0	1	0	0	0	0	0	0	0	0	0	2	0.142857	0.38499	0	0	1.23788	1.62287	2.06791	0.237228	0	0	0.762772	0.553373	285.1	289.1	289.2	288.7	3.43	27
ILMN_2692942	Sntb2	Mus musculus syntrophin, basic 2 (Sntb2), mRNA.	4.73536	5.19623	4.51609	4.176	1.96722	5.43272	7.66423	3.38528	3.10249	1.76998	3.17262	1.77031	2.02993	3.5916	0	0	0	0	0	0	1	0	0	0	0	0	0	0	1	0.0714286	1.18527	0	0	1.7094	2.89467	2.49674	0.409466	0	0	0.590534	0.490427	311.6	315.6	315.8	315.2	2.55	27
ILMN_1230375	LOC383125		4.73167	1.15159	5.90403	3.8507	2.29367	1.63379	4.3301	1.62648	2.75305	7.90482	3.67928	-1.43122	3.88433	4.52819	0	0	1	0	0	0	1	0	0	1	0	0	0	0	3	0.214286	0.672797	0	0	1.10088	1.77368	1.77268	0.379324	0	0	0.620676	0.537612	275.9	279.9	280.1	279.5	3.36	27
ILMN_2605031	E330018D03Rik	Mus musculus RIKEN cDNA E330018D03 gene (E330018D03Rik), mRNA.	4.72405	20.6461	1.15787	1.90565	1.72051	-1.45682	1.60112	1.25058	1.57963	2.45411	3.13171	14.458	2.87328	4.88085	0	1	0	0	0	0	0	0	0	0	0	1	0	0	2	0.142857	0	0	0	1.40192	1.40192	2.44572	0	0	0	1	0.57009	294.6	296.6	296.7	296.4	3.98	27
ILMN_2610609	Ttc39b	Mus musculus tetratricopeptide repeat domain 39B (Ttc39b), mRNA.	4.70812	7.45082	8.75875	9.36773	3.98793	1.23343	7.59621	5.05759	3.81186	5.0806	4.48513	-2.27101	5.47351	4.09184	0	1	1	1	0	0	1	0	0	0	0	0	0	0	4	0.285714	0	0	0	1.25111	1.25112	2.48901	0	0	0	1	0.623009	285.4	287.4	287.4	287.2	4.96	27
ILMN_2837779	Trpv2	Mus musculus transient receptor potential cation channel, subfamily V, member 2 (Trpv2), mRNA.	4.69988	27.8454	11.319	11.8813	1.89267	1.55356	6.18237	8.95489	2.62992	20.426	8.45717	1.85547	5.43068	5.08953	0	1	1	1	0	0	0	0	0	1	0	0	0	0	4	0.285714	0	0	0	2.18263	2.18263	3.9667	0	0	0	1	0.587321	330.5	332.5	332.5	332.3	4.27	27
ILMN_1252831	2310014H01Rik	PREDICTED: Mus musculus RIKEN cDNA 2310014H01 gene, transcript variant 3 (2310014H01Rik), mRNA.	4.69573	6.67793	8.74737	5.51568	2.99983	2.10479	5.39304	4.99116	2.99022	12.3625	6.28015	2.03668	4.92435	5.03814	0	1	1	1	0	0	1	0	0	1	1	0	0	0	6	0.428571	0.104488	0	0	1.11565	1.22014	2.33381	0.085636	0	0	0.914364	0.642265	276.3	280.3	280.5	279.9	5.32	27
ILMN_3160568	Ankrd50	Mus musculus ankrin repeat domain 50 (Ankrd50), mRNA.	4.69045	14.8566	1.77661	3.14352	5.35587	1.85935	5.63877	5.95964	2.07665	6.89587	4.12495	-2.39313	2.09846	7.81638	0	1	0	0	0	0	0	0	0	0	0	0	0	0	1	0.0714286	0	0	0	1.81197	1.81197	2.65291	0	0	0	1	0.487739	315.4	317.4	317.5	317.2	2.86	27
ILMN_2680770	Cysltr1	Mus musculus cysteinyl leukotriene receptor 1 (Cysltr1), mRNA.	4.68801	13.6582	22.0954	16.4143	4.27007	9.54586	4.87695	3.11169	2.16001	4.52296	11.7151	4.08273	8.21048	2.50849	0	1	1	1	0	1	0	0	0	0	1	0	0	0	5	0.357143	0.236705	0	0	1.87812	2.11483	3.8264	0.111927	0	0	0.888073	0.632909	318.6	322.6	322.7	322.1	4.8	27
ILMN_1248994	4933407C03Rik	PREDICTED: Mus musculus RIKEN cDNA 4933407C03 gene, transcript variant 6 (4933407C03Rik), mRNA.	4.68541	21.1155	4.09439	11.5337	2.90355	1.7655	4.42581	2.68012	2.8997	8.6494	4.51367	2.54287	4.16178	4.84916	0	1	0	1	0	0	0	0	0	1	0	0	0	0	3	0.214286	0	0	0.380072	1.19773	1.5778	3.05	0	0	0.240887	0.759113	0.763166	301.9	305.9	306	305.4	5.56	27
ILMN_1247133	Tns3	Mus musculus tensin 3 (Tns3), mRNA.	4.68176	19.1455	6.32263	13.7021	3.03964	3.97375	6.09328	5.03747	3.08284	6.83086	3.55334	1.58785	3.71364	4.86804	0	1	1	1	0	0	1	0	0	0	0	0	0	0	4	0.285714	0.718683	0	0	1.30088	2.01956	2.78597	0.355861	0	0	0.644139	0.652232	289.4	293.4	293.5	293	5.24	27
ILMN_1227836	Arpc1b	Mus musculus actin related protein 2/3 complex, subunit 1B (Arpc1b), mRNA.	4.67949	4.8111	11.4965	7.19283	3.6945	2.99644	7.76938	7.2462	3.07344	15.3784	7.37887	2.3794	6.72127	6.13636	0	0	1	1	0	0	1	1	0	1	1	0	0	0	6	0.428571	0.018773	0	0	1.29175	1.31052	2.95326	0.014325	0	0	0.985675	0.672084	288	292	292.2	291.6	6.05	27
ILMN_2752933	Tec	Mus musculus cytoplasmic tyrosine kinase, Dscr28C related (Drosophila) (Tec), mRNA.	4.67551	9.03672	19.7783	4.84696	5.94007	2.71316	6.49847	7.51358	3.38743	9.98641	8.62964	3.51198	7.30795	18.4251	0	0	1	0	0	0	1	1	0	0	1	0	0	1	5	0.357143	0	0	0	1.68936	1.68936	3.53872	0	0	0	1	0.641954	309.7	311.7	311.8	311.5	5.38	27
ILMN_1250612	Tbc1d2	Mus musculus TBC1 domain family, member 2 (Tbc1d2), mRNA.	4.67462	7.84351	7.86079	4.22655	8.00655	1.61267	5.35037	3.47425	2.64344	3.78021	9.45761	1.58403	2.01983	2.17786	0	0	1	0	1	0	0	0	0	0	1	0	0	0	3	0.214286	0	0	0	1.73931	1.73931	2.75764	0	0	0	1	0.526957	312.1	314.1	314.1	313.9	3.34	27
ILMN_2506727	9430052C07Rik		4.67227	2.53948	4.46837	9.3118	4.07105	5.52404	3.12678	2.46391	2.25683	2.57053	2.64937	3.9757	1.74711	2.09032	1	0	0	1	1	1	0	0	0	0	0	0	0	0	4	0.285714	0.611226	0	0.174111	0.962993	1.74833	2.20888	0.349606	0	0.099587	0.550807	0.718292	277.5	283.5	283.8	282.9	4.48	27
ILMN_2858359	Clspn	Mus musculus claspin homolog (Xenopus laevis) (Clspn), mRNA.	4.66208	6.95604	6.00421	6.01106	3.75034	3.25922	8.46388	4.94236	2.03199	14.4197	6.99985	2.65032	1.52704	8.19007	0	0	0	0	0	0	1	0	0	1	0	0	0	0	2	0.142857	0	0	0	1.81019	1.81019	2.98923	0	0	0	1	0.545821	315.3	317.3	317.4	317.1	3.61	27
ILMN_2696592	C77080		4.65829	8.2407	2.2421	21.4196	4.23435	3.95897	7.51524	7.10705	5.59883	54.9063	4.80938	2.34026	5.51655	11.4817	0	0	0	1	0	0	0	0	0	1	0	0	0	0	2	0.142857	0	0	0	2.65116	2.65116	4.48987	0	0	0	1	0.557143	346.2	348.2	348.3	348	3.77	27
ILMN_1255776	BC017643	Mus musculus cDNA sequence BC017643 (BC017643), mRNA.	4.65716	2.98797	10.8962	3.09436	2.75368	2.36493	3.56964	4.60069	2.13541	5.4605	5.29342	1.76365	3.88101	5.47671	1	0	1	0	0	0	0	1	0	0	1	0	0	1	5	0.357143	0.262159	0	0	0.914531	1.17669	1.93423	0.222794	0	0	0.777206	0.647144	260.5	264.5	264.7	264.1	5.11	27
ILMN_2461320	AU020206		4.657	1.54771	3.72122	5.50072	1.37286	1.81964	3.54813	2.18438	4.26325	3.44077	7.94006	4.10522	3.29573	5.58278	0	0	0	0	0	0	0	0	0	0	1	0	0	0	1	0.0714286	0.889263	0	0.30126	1.73199	2.92251	2.59702	0.304281	0	0.103083	0.592636	0.566953	324.5	330.5	330.8	329.9	2.26	27
ILMN_2601946	5033414K04Rik	Mus musculus RIKEN cDNA 5033414K04 gene (5033414K04Rik), mRNA.	4.64901	6.49502	10.6334	5.25452	4.42814	3.76787	6.37215	4.35463	3.21902	11.987	5.87108	1.17281	4.2115	4.08596	0	0	1	1	1	0	1	0	0	1	1	0	0	0	6	0.428571	0.818773	0	0	1.11863	1.9374	2.45163	0.422613	0	0	0.577387	0.660454	277.3	281.3	281.5	280.9	5.55	27
ILMN_2700848	Arrb2	Mus musculus arrestin, beta 2 (Arrb2), mRNA.	4.6429	6.42101	9.80845	5.31526	3.32903	2.50976	4.10619	3.97568	2.7046	7.6518	5.45111	2.59899	4.00129	2.9137	1	1	1	1	0	0	1	0	0	1	1	0	0	0	7	0.5	0	0	0.012122	0.952046	0.964169	2.0121	0	0	0.012573	0.987427	0.649538	264.3	268.3	268.4	267.9	5.4	27
ILMN_2606144	Cd300lf	Mus musculus CD300 antigen like family member F (Cd300lf), mRNA.	4.63108	9.00421	9.57286	3.21772	2.34385	2.08157	8.68509	-1.2551	3.45916	3.29064	3.45527	1.40692	3.51551	-1.05169	0	1	1	0	0	0	1	0	0	0	0	0	0	0	3	0.214286	0	0.029492	0	1.18608	1.21557	2.12183	0	0.024262	0	0.975738	0.587679	282.7	286.7	286.9	286.3	4.11	27
ILMN_1213809	Gpr18	Mus musculus G protein-coupled receptor 18 (Gpr18), mRNA.	4.62763	12.5067	25.8054	9.21753	1.32435	3.04491	5.54759	4.15004	6.52633	27.5389	12.972	1.65813	4.84647	4.32082	0	0	1	0	0	0	0	0	0	0	0	0	0	0	1	0.0714286	0	0	0.145265	4.04751	4.19278	5.79583	0	0	0.034647	0.965353	0.493799	383.3	387.3	387.5	386.9	2.58	27
ILMN_2524865	Chi3l4	Mus musculus chitinase 3-like 4 (Chi3l4), mRNA.	4.62747	4.81177	4.3072	1.53281	1.16302	1.35334	4.70606	1.80663	3.44735	1.64357	-1.04404	1.00559	-1.3168	-1.44728	1	1	1	0	0	0	1	0	1	0	0	0	0	0	5	0.357143	0	0	0.098715	0.450897	0.549612	1.18203	0	0	0.179608	0.820392	0.757756	217.5	221.5	221.6	221.1	6.04	27
ILMN_2715848	Slitrk4	Mus musculus SLIT and NTRK-like family, member 4 (Slitrk4), mRNA.	4.62379	9.2717	7.54267	4.14382	1.59511	1.65789	5.18549	2.44325	4.43964	3.65305	7.34455	1.83114	4.39349	1.52229	0	1	1	0	0	0	0	0	0	0	1	0	0	0	3	0.214286	0	0	0.140113	1.47947	1.61959	2.43659	0	0	0.086512	0.913488	0.580986	306	310	310.2	309.6	3.22	27
ILMN_1240726	Mmp14	Mus musculus matrix metallopeptidase 14 (membrane-inserted) (Mmp14), mRNA.	4.62307	12.231	10.1297	8.8271	4.50379	4.06259	7.23684	7.09622	4.55672	18.1178	6.68082	3.00744	8.16564	6.8952	0	1	1	1	0	0	1	1	0	1	1	0	0	0	7	0.5	0.058974	0	0	1.44471	1.50369	3.23149	0.03922	0	0	0.96078	0.665056	297.1	301.1	301.3	300.7	5.89	27
ILMN_2860480	Arpc1b	Mus musculus actin related protein 2/3 complex, subunit 1B (Arpc1b), mRNA.	4.61746	4.72092	10.8365	5.58269	3.36835	3.19674	5.69123	4.93765	3.31628	10.7005	5.86426	3.46524	5.33554	4.88043	1	0	1	1	0	0	1	1	0	1	1	0	0	0	7	0.5	0.096109	0	0	0.90984	1.00595	2.23627	0.095541	0	0	0.904459	0.695602	259.8	263.8	264	263.4	6.69	27
ILMN_2531520	Gm962	Mus musculus gene model 962, (NCBI) (Gm962), mRNA.	4.60755	14.7332	19.9861	4.07579	8.30615	5.60077	8.94325	5.39996	4.91685	31.7892	16.3311	-1.24782	8.82523	14.1153	0	1	1	0	1	0	1	0	0	1	1	0	0	1	7	0.5	0.186681	0	0	2.19459	2.38127	4.4388	0.078396	0	0	0.921604	0.629951	331.1	335.1	335.3	334.7	5.03	27
ILMN_2680038	Nuak2	Mus musculus NUAK family, SNF1-like kinase, 2 (Nuak2), mRNA.	4.60715	11.0168	12.2771	8.88185	6.58672	3.12873	7.75066	11.692	3.74251	56.9017	7.52439	1.99737	6.72235	5.79597	0	0	1	1	0	0	1	1	0	1	0	0	0	0	5	0.357143	0	0	0	2.08685	2.08685	4.05369	0	0	0	1	0.613897	326.8	328.8	328.9	328.6	4.77	27
ILMN_2834379	Tgfbi	Mus musculus transforming growth factor, beta induced (Tgfbi), mRNA.	4.59854	8.05955	11.2795	6.43857	3.39742	2.68022	6.23721	6.00733	5.26232	14.9762	7.15239	1.78627	7.58036	5.23404	0	1	1	1	0	0	1	1	1	1	1	0	1	0	9	0.642857	0.696171	0	0	1.19607	1.89224	2.77132	0.367908	0	0	0.632092	0.678611	282.6	286.6	286.8	286.2	6.09	27
ILMN_1216190	Rasa3		4.59527	7.56077	3.38751	2.36808	1.81252	1.32439	2.08245	1.70305	2.2193	10.2857	3.17559	2.03915	1.73363	4.98793	0	0	0	0	0	0	0	0	0	1	0	0	0	0	1	0.0714286	0	0	0	1.39277	1.39277	1.97165	0	0	0	1	0.4702	294.1	296.1	296.1	295.9	2.66	27
ILMN_2881620	Nfe2	Mus musculus nuclear factor, erythroid derived 2 (Nfe2), mRNA.	4.59495	2.78414	6.19198	1.92186	1.19253	1.53608	6.96836	1.41157	2.99296	2.05234	2.70776	1.00629	5.74192	-1.09366	1	0	1	0	0	0	1	0	0	0	0	0	1	0	4	0.285714	0	0	0	0.87397	0.87397	1.54748	0	0	0	1	0.576422	256.3	258.3	258.4	258.1	4.08	27
ILMN_2688262	Csf2rb	Mus musculus colony stimulating factor 2 receptor, beta, low-affinity (granulocyte-macrophage) (Csf2rb), mRNA.	4.5932	5.01355	7.97661	-1.10209	2.15774	1.04008	6.13856	-1.04503	-1.08228	3.38104	1.56971	-1.85523	4.63413	1.70307	0	0	1	0	0	0	1	0	0	0	0	0	0	0	2	0.142857	0	0.006007	0	1.32515	1.33116	1.81064	0	0.004513	0	0.995487	0.453378	290.4	294.4	294.6	294	2.45	27
ILMN_2570478	A630097K09Rik		4.59217	5.08037	4.21286	2.65152	5.41169	1.15255	3.42846	3.06853	2.41379	4.76112	5.02953	1.82792	2.43344	1.00503	0	0	0	0	1	0	0	0	0	0	0	0	0	0	1	0.0714286	0	0	0	1.25095	1.25095	1.95355	0	0	0	1	0.51974	285.4	287.4	287.4	287.2	3.25	27
ILMN_2447712	Ibrdc3		4.5781	2.55502	4.69891	2.24834	3.90315	1.47775	5.70758	1.00722	-1.11358	2.30346	3.78174	-1.79631	3.84727	1.70036	0	0	0	0	0	0	1	0	0	0	0	0	0	0	1	0.0714286	0	0	0	1.43558	1.43558	1.77218	0	0	0	1	0.392453	296.5	298.5	298.6	298.3	1.94	27
ILMN_2708469	Elmo2	Mus musculus engulfment and cell motility 2, ced-12 homolog (C. elegans) (Elmo2), transcript variant 3, mRNA.	4.56875	7.76938	4.65047	8.06883	6.58197	3.50405	4.82731	6.58097	2.64942	6.09644	3.78384	3.24508	1.8106	1.13674	0	0	0	1	1	0	0	1	0	0	0	0	0	0	3	0.214286	0	0	0.35433	1.43399	1.78832	2.82388	0	0	0.198135	0.801865	0.682587	312.8	316.8	316.9	316.4	3.91	27
ILMN_2674533	Renbp	Mus musculus renin binding protein (Renbp), mRNA.	4.56843	6.47344	13.4315	8.69087	4.96784	3.59166	10.7316	13.6568	6.78374	17.6109	13.9293	1.27932	5.7951	4.79124	0	0	1	1	0	0	1	1	0	1	1	0	0	0	6	0.428571	2.60379	0.017235	0	2.05754	4.67857	4.15273	0.556536	0.003684	0	0.43978	0.634437	327.7	333.7	334	333.1	4.92	27
ILMN_2470069	Col5a2		4.5682	4.54212	14.7291	18.6502	10.0719	11.0339	12.0118	8.6557	1.29725	29.9296	9.32934	8.98914	15.0943	10.2136	0	0	1	1	1	1	1	0	0	1	1	0	1	0	8	0.571429	0	0	0	2.03219	2.03219	4.75709	0	0	0	1	0.679606	324.7	326.7	326.7	326.5	6.36	27
ILMN_1221952	Steap1	Mus musculus six transmembrane epithelial antigen of the prostate 1 (Steap1), mRNA.	4.56764	3.16609	9.41167	5.43379	1.89204	1.9886	5.3598	1.58359	1.94518	5.08789	4.57152	2.84394	5.02968	3.95777	0	0	1	0	0	0	0	0	0	0	0	0	0	0	1	0.0714286	0.246279	0	0.025814	1.86845	2.14054	2.66259	0.115055	0	0.01206	0.872886	0.482236	319.3	325.3	325.6	324.6	2.37	27
ILMN_2847144	Hist1h2ak	Mus musculus histone cluster 1, H2ak (Hist1h2ak), mRNA.	4.56392	15.752	33.5549	12.5777	2.81813	3.25871	13.9253	12.5875	1.15015	28.9615	7.41399	25.4348	8.37816	7.12789	0	0	1	1	0	0	1	0	0	1	0	0	0	0	4	0.285714	0	0	0	2.95781	2.95781	5.53886	0	0	0	1	0.599492	355.1	357.1	357.1	356.9	4.49	27
ILMN_2550570	Fibp		4.55697	2.39142	3.90453	3.91019	5.00365	1.07551	3.9254	2.52551	1.87647	15.5603	8.79571	1.04319	8.39541	3.62576	0	0	0	0	0	0	0	0	0	1	1	0	0	0	2	0.142857	0	0	0	1.9215	1.9215	2.77652	0	0	0	1	0.480962	320.2	322.2	322.2	321.9	2.78	27
ILMN_2605393	Man2b2	Mus musculus mannosidase 2, alpha B2 (Man2b2), mRNA.	4.55642	7.82378	11.5628	4.47603	5.48123	3.67285	5.42431	4.6692	3.17527	14.2554	4.35206	-1.02235	2.09686	2.16861	0	0	1	0	1	0	1	0	0	1	0	0	0	0	4	0.285714	0.551952	0	0.179273	1.42897	2.16019	2.74567	0.25551	0	0.082989	0.661501	0.650633	305.8	311.8	312.1	311.2	3.95	27
ILMN_1256182	HIP-1		4.55476	6.20687	1.86953	3.05155	3.39144	-1.34264	2.24635	1.43376	2.0791	1.34016	3.44917	-1.52408	1.01487	1.57508	1	1	0	0	1	0	0	0	0	0	0	0	0	0	3	0.214286	0	0	0.035265	0.781711	0.816976	1.25693	0	0	0.043165	0.956835	0.552891	250.8	254.8	255	254.4	3.22	27
ILMN_2948971	Slc35b3	Mus musculus solute carrier family 35, member B3 (Slc35b3), mRNA.	4.54853	2.39446	9.86436	3.51085	5.63041	1.44696	5.02889	5.89554	2.47815	9.45864	6.42068	3.84593	2.48406	3.61182	0	0	1	0	0	0	0	0	0	0	0	0	0	0	1	0.0714286	0	0	0	1.89861	1.89861	2.90211	0	0	0	1	0.509336	319.2	321.2	321.2	321	3.11	27
ILMN_2830983	Eml3	Mus musculus echinoderm microtubule associated protein like 3 (Eml3), mRNA.	4.54632	2.16895	3.28382	3.3669	1.54467	1.48681	1.70074	5.39286	4.03797	8.51496	3.78672	-1.83451	2.78389	2.40451	0	0	0	0	0	0	0	0	0	1	0	0	0	0	1	0.0714286	0.023781	0	0	1.34347	1.36725	1.83939	0.017394	0	0	0.982606	0.452478	291.2	295.2	295.4	294.8	2.43	27
ILMN_2593034	C1qtnf3	Mus musculus C1q and tumor necrosis factor related protein 3 (C1qtnf3), mRNA.	4.5416	6.89619	8.74844	10.7515	3.34707	4.1892	2.02601	6.12167	2.73023	7.49243	6.12676	1.29296	3.78808	4.64392	0	0	0	1	0	0	0	0	0	0	0	0	0	0	1	0.0714286	0.012218	0	0	2.13676	2.14898	3.23652	0.005686	0	0	0.994314	0.504929	328.8	332.8	332.9	332.4	3.04	27
ILMN_1237421	Ncam1	Mus musculus neural cell adhesion molecule 1 (Ncam1), transcript variant 1, mRNA.	4.53342	20.2554	1.83802	17.3803	2.78362	9.32902	4.17663	6.89978	4.5635	6.63134	3.31619	4.38016	16.7924	11.9724	0	1	0	1	0	1	0	0	0	0	0	0	1	1	5	0.357143	0	0	0	1.74544	1.74544	3.85459	0	0	0	1	0.660384	312.4	314.4	314.4	314.2	5.83	27
ILMN_3162239	Prr7	Mus musculus proline rich 7 (synaptic) (Prr7), mRNA.	4.5324	4.54832	10.7019	3.39662	4.72947	1.69062	4.74175	3.43028	5.63332	8.32625	4.50984	2.34968	4.90663	4.65353	0	0	1	0	0	0	0	0	0	0	0	0	0	0	1	0.0714286	0	0	0	1.60707	1.60707	2.62721	0	0	0	1	0.541223	305.7	307.7	307.7	307.5	3.54	27
ILMN_2926198	2310016C08Rik	Mus musculus RIKEN cDNA 2310016C08 gene (2310016C08Rik), mRNA.	4.53114	3.55603	6.68626	2.9873	2.98394	2.40698	6.93118	2.65894	2.54638	4.82312	3.78443	1.52286	4.85016	3.6726	1	0	1	0	0	0	1	0	0	0	0	0	0	0	3	0.214286	0.311021	0.013078	0	0.787534	1.11163	1.67552	0.279787	0.011765	0	0.708448	0.653884	249.7	255.7	256	255.1	5.18	27
ILMN_2713538	Bmp1	Mus musculus bone morphogenetic protein 1 (Bmp1), mRNA.	4.53012	4.46275	7.28574	7.2135	3.2982	2.98985	5.00857	3.62046	2.69893	11.2091	4.05633	1.48166	5.86054	4.95279	0	0	1	1	0	0	1	0	0	1	0	0	0	0	4	0.285714	0	0	0	0.995435	0.995435	2.21574	0	0	0	1	0.663058	266.9	268.9	268.9	268.7	5.9	27
ILMN_1221274	Rab32	Mus musculus RAB32, member RAS oncogene family (Rab32), mRNA.	4.52549	6.19455	22.4194	5.20032	9.53439	3.45533	8.58382	7.19528	2.97914	16.1441	8.46934	2.18381	6.01181	4.23509	0	0	1	0	1	0	1	0	0	1	1	0	0	0	5	0.357143	0	0	0	1.77809	1.77809	3.51873	0	0	0	1	0.621009	313.9	315.9	315.9	315.7	4.92	27
ILMN_1238511	4930402H24Rik		4.51993	3.43648	4.07641	1.18094	5.80292	-1.74448	3.28096	2.92832	2.51506	5.81965	2.90674	2.53108	2.69073	2.20008	0	0	0	0	1	0	0	0	0	0	0	0	0	0	1	0.0714286	0.284251	0	0	1.55852	1.84277	2.06911	0.154252	0	0	0.845748	0.437158	303.5	307.5	307.7	307.1	2.24	27
ILMN_2773900	Glipr2		4.51547	5.3989	11.6358	3.73451	4.075	2.4608	5.40435	4.42775	4.32554	10.0232	5.38903	1.64789	6.29221	5.42626	0	0	1	0	0	0	1	0	0	1	1	0	0	0	4	0.285714	0.37842	0	0	1.13981	1.51823	2.42408	0.24925	0	0	0.75075	0.649247	278.4	282.4	282.6	282	5.34	27
ILMN_1240779	Osp94		4.51445	5.53698	4.42093	1.30885	3.23526	1.42247	1.88077	1.42227	2.85438	3.90386	5.43395	-1.6198	2.55697	1.37648	0	0	0	0	0	0	0	0	0	0	1	0	0	0	1	0.0714286	0	0	0	1.11291	1.11291	1.55168	0	0	0	1	0.462076	275.9	277.9	278	277.7	2.58	27
ILMN_2743244	Cd86	Mus musculus CD86 antigen (Cd86), mRNA.	4.51234	4.13093	20.2549	2.83451	4.50373	1.9471	5.53967	3.03217	5.49998	9.6623	19.478	1.95632	4.45935	2.79402	0	0	1	0	0	0	0	0	0	0	1	0	0	0	2	0.142857	0	0	0.424392	2.4209	2.84529	3.9471	0	0	0.149156	0.850844	0.600042	351.1	355.1	355.2	354.7	2.88	27
ILMN_1231851	Enpp1	Mus musculus ectonucleotide pyrophosphatase/phosphodiesterase 1 (Enpp1), mRNA.	4.51077	10.0301	16.2873	3.26074	5.48313	4.58787	3.80897	8.09946	1.84309	7.9633	3.31377	2.32963	2.70095	2.2963	0	0	1	0	0	0	0	0	0	0	0	0	0	0	1	0.0714286	0	0	0	2.03037	2.03037	3.16514	0	0	0	1	0.518891	324.6	326.6	326.7	326.4	3.24	27
ILMN_1219213	1810058M03Rik		4.50843	6.3474	4.73577	-1.01065	2.09644	1.00652	2.18362	4.64539	2.84685	3.5203	2.21972	1.06866	1.3409	1.93997	1	1	1	0	0	0	0	1	0	0	0	0	0	0	4	0.285714	0	0	0.200157	0.825223	1.02538	1.60225	0	0	0.195203	0.804797	0.677271	267.8	271.8	271.9	271.4	3.59	27
ILMN_2650953	Slc12a7	Mus musculus solute carrier family 12, member 7 (Slc12a7), mRNA.	4.50585	10.8263	3.21295	4.94846	2.80523	2.15928	1.23138	4.92919	2.17576	10.7334	3.27081	2.05064	1.15175	4.39474	0	1	0	0	0	0	0	0	0	1	0	0	0	0	2	0.142857	0	0	0.169389	1.48496	1.65434	2.35605	0	0	0.10239	0.89761	0.571367	307.6	311.6	311.8	311.2	2.9	27
ILMN_3067068	Tmsb10	Mus musculus thymosin, beta 10 (Tmsb10), mRNA.	4.50242	4.79534	7.2589	3.62183	2.37812	1.93532	4.81228	5.42933	2.78051	8.37313	4.30108	2.46326	4.37051	5.17921	0	0	1	0	0	0	1	1	0	1	0	0	0	0	4	0.285714	0.487637	0	0	1.09118	1.57882	2.09233	0.308862	0	0	0.691138	0.611329	275	279	279.2	278.6	4.51	27
ILMN_2615864	Phtf1		4.50179	3.41235	3.33838	4.12062	2.55535	1.57574	3.25622	1.08309	1.84469	3.34081	3.68145	-1.22673	2.92094	5.58013	0	0	0	1	0	0	0	0	0	0	0	0	0	1	2	0.142857	0	0	0	0.963142	0.963142	1.52162	0	0	0	1	0.525272	264.2	266.2	266.3	266	3.32	27
ILMN_1258136	Ccdc88a	Mus musculus coiled coil domain containing 88A (Ccdc88a), mRNA.	4.49969	2.44879	5.96119	1.15635	1.77257	1.30645	1.15421	1.46125	2.11058	2.81064	2.51551	1.67566	1.83838	1.99721	0	0	1	0	0	0	0	0	0	0	0	0	0	0	1	0.0714286	0	0	0.038824	1.19598	1.2348	1.40507	0	0	0.031442	0.968558	0.381091	284.3	288.3	288.5	287.9	1.58	27
ILMN_1253798	4933407L23Rik		4.49961	3.45735	1.62831	2.08855	1.6142	1.41824	1.28806	-1.239	1.94456	2.53421	5.77422	1.62361	2.128	-1.73633	0	0	0	0	0	0	0	0	0	0	1	0	0	0	1	0.0714286	0.426181	0.036891	0.146679	1.1749	1.78465	1.65813	0.238803	0.020671	0.082189	0.658336	0.531097	291.5	299.5	300	298.7	1.76	27
ILMN_2988143	Plac8	Mus musculus placenta-specific 8 (Plac8), mRNA.	4.49493	4.87511	26.7034	2.0819	3.12518	1.41495	8.39296	9.10147	1.48533	9.07543	7.35054	2.77471	4.71666	3.72212	0	0	1	0	0	0	1	1	0	0	0	0	0	0	3	0.214286	1.72871	0	0	1.82564	3.55435	3.42885	0.486363	0	0	0.513637	0.604067	317.2	321.2	321.3	320.8	4.34	27
ILMN_2470672	Tmem47	Mus musculus transmembrane protein 47 (Tmem47), mRNA.	4.48964	-1.19394	1.22436	-1.14935	1.22876	2.11382	1.12215	-1.00806	1.08209	1.35541	2.00139	-3.83076	-1.04343	2.01596	1	0	0	0	0	0	0	0	0	0	0	0	0	0	1	0.0714286	0.828857	0	0	0.788529	1.61739	0.924421	0.512467	0	0	0.487533	0.365862	249.2	253.2	253.4	252.8	1.34	27
ILMN_1244484	Robo1	Mus musculus roundabout homolog 1 (Drosophila) (Robo1), mRNA.	4.48949	16.9549	5.65705	3.26907	8.64856	2.85279	2.79386	2.42427	2.3229	4.90516	4.43612	1.02647	3.34947	4.02756	0	1	0	0	1	0	0	0	0	0	0	0	0	0	2	0.142857	0.382208	0.068733	0	1.45555	1.90649	2.45165	0.200478	0.036052	0	0.76347	0.56744	300.8	306.8	307.1	306.2	3.53	27
ILMN_1225528	Trib3	Mus musculus tribbles homolog 3 (Drosophila) (Trib3), mRNA.	4.48746	2.08012	4.77558	5.52288	5.99991	5.49731	6.87281	6.76645	4.27213	3.81831	2.58645	1.11973	2.97344	3.9782	0	0	0	1	1	0	1	1	0	0	0	0	0	0	4	0.285714	0.426489	0	0	1.50518	1.93167	2.59909	0.220788	0	0	0.779212	0.567795	300.9	304.9	305	304.5	3.58	27
ILMN_2713305	F11r	Mus musculus F11 receptor (F11r), mRNA.	4.48226	2.49545	2.25918	4.81528	1.95854	2.11389	1.9177	2.47118	1.49906	3.28168	2.40615	-1.1949	1.28307	2.43964	1	0	0	1	0	0	0	0	0	0	0	0	0	0	2	0.142857	0	0.085711	0.127255	0.535518	0.748485	1.12997	0	0.114513	0.170017	0.71547	0.710471	237.1	243.1	243.4	242.5	4.02	27
ILMN_2638333	Sbno2	Mus musculus strawberry notch homolog 2 (Drosophila) (Sbno2), mRNA.	4.47163	3.02171	8.17787	3.44881	4.80974	2.65245	6.01882	3.1397	2.47352	8.12255	12.0322	2.48128	3.34576	5.39625	0	0	1	0	0	0	1	0	0	0	1	0	0	0	3	0.214286	0	0.010864	0	1.41113	1.42199	2.48475	0	0.00764	0	0.99236	0.576899	295.7	299.7	299.9	299.3	4.02	27
ILMN_2859847	Pygl	Mus musculus liver glycogen phosphorylase (Pygl), mRNA.	4.46946	3.5078	12.2046	2.80453	3.64986	1.55698	4.33532	3.42262	2.51228	5.52727	5.60261	1.55398	3.01008	2.58341	0	0	1	0	0	0	0	0	0	0	1	0	0	0	2	0.142857	0.319841	0	0	1.15822	1.47806	1.96321	0.216392	0	0	0.783608	0.559669	279.6	283.6	283.8	283.2	3.69	27
ILMN_2483948	Specc1	Mus musculus sperm antigen with calponin homology and coiled-coil domains 1 (Specc1), mRNA.	4.46791	42.46	18.5349	37.2648	5.04677	8.94155	28.6797	13.9037	6.34293	78.5116	10.7923	3.3102	9.8371	9.40395	0	1	1	1	0	0	1	1	0	1	0	0	0	0	6	0.428571	0	0	0	2.52562	2.52562	5.99926	0	0	0	1	0.684258	342.3	344.3	344.3	344.1	6.5	27
ILMN_1242661	Itgb2	Mus musculus integrin beta 2 (Itgb2), mRNA.	4.46667	2.20488	8.55223	2.98171	1.1881	2.86587	6.92474	-1.43886	1.38571	2.46673	3.78718	4.14666	6.31829	1.52503	0	0	1	0	0	0	1	0	0	0	0	0	0	0	2	0.142857	0	0	0	1.62518	1.62518	2.13876	0	0	0	1	0.430098	306.6	308.6	308.6	308.4	2.26	27
ILMN_2628822	Oas1g	Mus musculus 2'-5' oligoadenylate synthetase 1G (Oas1g), mRNA.	4.43959	8.98738	16.8985	8.22685	4.25005	2.32697	9.70037	2.06137	1.46886	6.76161	4.71269	3.7557	2.27421	1.82797	0	0	1	0	0	0	1	0	0	0	0	0	0	0	2	0.142857	0	0	0	2.3776	2.3776	3.75618	0	0	0	1	0.525262	337.4	339.4	339.5	339.2	3.32	27
ILMN_2453874	Sdcbp	Mus musculus syndecan binding protein (Sdcbp), transcript variant 1, mRNA.	4.42914	4.13896	8.13547	4.30627	4.17802	2.44782	5.12545	3.01603	2.63972	5.45911	4.24856	1.93384	3.84727	3.58832	1	0	1	1	1	0	1	0	0	1	1	0	0	0	7	0.5	0.444042	0.003943	0	0.766173	1.21416	1.72444	0.36572	0.003248	0	0.631033	0.670664	246.9	252.9	253.2	252.3	5.71	27
ILMN_2427292	Rasgrp4		4.42614	1.43197	2.95074	2.60514	2.89784	2.14017	1.42433	2.41237	2.52083	1.83477	5.21729	1.15492	2.03496	1.47404	1	0	0	0	0	0	0	0	0	0	1	0	0	0	2	0.142857	0	0	0.192324	0.737561	0.929885	1.44487	0	0	0.206826	0.793174	0.683272	259.7	263.7	263.8	263.2	3.55	27
ILMN_2792809	Arpc5	Mus musculus actin related protein 2/3 complex, subunit 5 (Arpc5), mRNA.	4.42369	5.28865	9.20776	4.60991	3.0872	2.41157	4.68367	4.86192	3.13885	11.9964	5.51009	2.1808	4.27522	4.1018	0	0	1	1	0	0	1	1	0	1	1	0	0	0	6	0.428571	0.03633	0	0	0.963524	0.999854	2.15286	0.036335	0	0	0.963665	0.664668	264.3	268.3	268.5	267.9	5.85	27
ILMN_2978009	N4bp2	Mus musculus NEDD4 binding protein 2 (N4bp2), mRNA.	4.42154	3.56351	8.2279	3.35474	2.81595	1.6883	4.44789	1.59712	3.47647	3.04182	2.95708	-1.57995	4.76068	2.03111	0	0	1	0	0	0	1	0	0	0	0	0	0	0	2	0.142857	0	0	0	1.11266	1.11266	1.82615	0	0	0	1	0.543032	275.9	277.9	277.9	277.7	3.57	27
ILMN_1248347	Nfam1	Mus musculus Nfat activating molecule with ITAM motif 1 (Nfam1), mRNA.	4.42139	3.94767	8.75268	5.94881	1.47194	2.0302	2.63825	2.04263	2.66201	4.07604	2.81103	4.68879	1.23582	3.50575	0	0	1	0	0	0	0	0	0	0	0	0	0	0	1	0.0714286	0	0	0	1.92137	1.92137	2.40551	0	0	0	1	0.400948	320.1	322.1	322.2	321.9	2.01	27
ILMN_1241768	Col23a1		4.41863	4.2625	2.01677	1.00257	-1.3002	-1.17801	1.26211	1.23885	1.64869	2.00328	-1.20264	-1.07056	2.27789	2.42851	1	1	0	0	0	0	0	0	0	0	0	0	0	0	2	0.142857	0	0	0.000287	0.508848	0.509135	0.725081	0	0	0.000564	0.999436	0.4756	210.2	214.2	214.3	213.8	2.68	27
ILMN_3053593	Glipr2	Mus musculus GLI pathogenesis-related 2 (Glipr2), mRNA.	4.41725	4.58101	10.9247	3.86551	5.05805	2.70143	5.72105	5.5098	2.83264	12.2533	5.54351	2.07279	6.37636	4.97639	0	0	1	0	1	0	1	1	0	1	1	0	0	0	6	0.428571	1.28167	0	0	1.14356	2.42522	2.52279	0.528473	0	0	0.471527	0.663068	279.4	283.4	283.6	283	5.6	27
ILMN_1245850	4933427D14Rik	Mus musculus RIKEN cDNA 4933427D14 gene (4933427D14Rik), mRNA.	4.41672	1.17354	6.10736	3.32345	3.63229	1.79375	3.35609	2.42196	4.44816	1.96746	3.38217	2.25941	2.01293	2.74797	0	0	1	0	0	0	0	0	0	0	0	0	0	0	1	0.0714286	0	0	0.204359	1.23947	1.44383	1.96109	0	0	0.14154	0.85846	0.585059	296.2	300.2	300.4	299.8	2.7	27
ILMN_1235687	Shkbp1	Mus musculus Sh3kbp1 binding protein 1 (Shkbp1), mRNA.	4.41435	6.37415	3.17009	3.15763	5.13427	2.89101	3.72929	2.39608	2.53579	5.84891	5.42858	-1.34965	3.16755	3.81668	0	0	0	0	1	0	0	0	0	0	0	0	0	0	1	0.0714286	0	0	0.369217	1.30383	1.67305	2.33437	0	0	0.220686	0.779314	0.657452	307	311	311.1	310.6	3.14	27
ILMN_3140913	Tbc1d2	Mus musculus TBC1 domain family, member 2 (Tbc1d2), mRNA.	4.41014	17.4139	13.7597	4.94236	7.22121	2.2693	5.22728	8.15014	2.17272	3.81831	3.89642	2.05224	4.21364	2.77321	0	1	1	0	1	0	1	1	0	0	0	0	0	0	5	0.357143	0	0	0	1.42482	1.42482	2.68991	0	0	0	1	0.602731	295.9	297.9	298	297.7	4.55	27
ILMN_2683486	AI115600	PREDICTED: Mus musculus expressed sequence AI115600 (AI115600), mRNA.	4.40533	9.04007	6.04692	6.22158	3.69363	2.68966	4.013	3.37684	3.09637	7.74322	4.13762	1.8	4.58302	2.85238	1	1	1	1	1	0	1	0	0	1	0	0	0	0	7	0.5	0	0	0	0.884821	0.884821	1.86843	0	0	0	1	0.644827	257.3	259.3	259.4	259.1	5.45	27
ILMN_2735350	Gdf15	Mus musculus growth differentiation factor 15 (Gdf15), mRNA.	4.39557	8.06812	6.02026	14.4142	13.7395	5.51257	9.80393	4.57961	10.3445	14.4905	9.83517	2.97588	3.4044	6.28919	0	0	0	1	1	0	1	0	1	1	1	0	0	0	6	0.428571	0	0	0	2.13233	2.13233	4.16762	0	0	0	1	0.616269	328.6	330.6	330.6	330.4	4.82	27
ILMN_1235488	Garnl3	Mus musculus GTPase activating RANGAP domain-like 3 (Garnl3), mRNA.	4.38477	3.75497	4.48498	2.86815	3.55429	3.1933	1.68368	4.08313	2.67156	9.84165	18.2506	-1.58496	4.56928	10.1695	0	0	0	0	0	0	0	0	0	0	1	0	0	0	1	0.0714286	2.21855	0	0	2.10591	4.32446	3.04854	0.513024	0	0	0.486976	0.486453	328.8	332.8	333	332.4	2.62	27
ILMN_2731407	Gdf3	Mus musculus growth differentiation factor 3 (Gdf3), mRNA.	4.3771	3.07233	17.849	15.4043	4.73505	6.33546	14.323	3.04164	4.05485	16.5796	11.6092	4.62478	9.57142	8.75819	0	0	1	1	0	0	1	0	0	1	1	0	0	0	5	0.357143	0.129042	0	0	2.34756	2.4766	4.46236	0.052104	0	0	0.947896	0.605994	336.5	340.5	340.6	340.1	4.49	27
ILMN_2678580	Lass6	Mus musculus LAG1 homolog, ceramide synthase 6 (Lass6), mRNA.	4.37551	3.16528	10.2193	2.83962	2.88914	1.69899	4.62175	1.74267	2.61215	4.33781	3.14013	2.33634	3.79167	1.17719	0	0	1	0	0	0	0	0	0	0	0	0	0	0	1	0.0714286	0	0	0	1.37207	1.37207	2.03847	0	0	0	1	0.495183	292.9	294.9	294.9	294.7	2.94	27
ILMN_1254631	AI481316		4.37354	5.44249	4.45994	3.63068	2.31434	2.27442	3.93963	2.5235	2.6247	4.98952	2.72357	1.36716	3.64992	3.80639	1	1	1	1	0	0	1	0	0	1	0	0	0	1	7	0.5	0	0	0	0.606418	0.606418	1.31173	0	0	0	1	0.653273	226.7	228.7	228.8	228.5	5.65	27
ILMN_2721503	Naglu	Mus musculus alpha-N-acetylglucosaminidase (Sanfilippo disease IIIB) (Naglu), mRNA.	4.36982	1.86094	6.01556	6.10935	3.42039	2.52149	2.23451	1.87018	3.50054	5.79979	3.56049	-1.02688	2.45837	2.99907	0	0	1	1	0	0	0	0	0	0	0	0	0	0	2	0.142857	0	0.060334	0	1.20094	1.26127	1.88614	0	0.047836	0	0.952164	0.534329	284.9	288.9	289	288.5	3.09	27
ILMN_2744006	Mtap6	Mus musculus microtubule-associated protein 6 (Mtap6), transcript variant 3, mRNA.	4.36778	5.81898	3.45491	3.63249	6.01598	5.34263	4.43576	5.15689	2.12463	8.91211	8.59829	-1.36202	1.93983	5.99046	0	0	0	0	0	0	0	0	0	0	1	0	0	0	1	0.0714286	0	0	0	1.80969	1.80969	2.79804	0	0	0	1	0.514922	315.3	317.3	317.3	317.1	3.18	27
ILMN_2746681	BC013712	Mus musculus cDNA sequence BC013712 (BC013712), mRNA.	4.36082	14.2182	13.9631	18.7381	3.98484	2.18332	5.37945	3.44177	1.87758	18.9265	4.98157	1.91875	6.62996	1.28767	0	1	1	1	0	0	0	0	0	1	0	0	0	0	4	0.285714	0	0	0	2.15115	2.15115	3.73978	0	0	0	1	0.568594	329.3	331.3	331.3	331.1	3.95	27
ILMN_2956973	Lpcat2	Mus musculus lysophosphatidylcholine acyltransferase 2 (Lpcat2), mRNA.	4.36037	3.51332	6.2917	3.02799	2.19737	2.01374	3.79221	-1.40204	2.35412	4.1663	8.12912	2.55003	3.35396	1.41114	0	0	1	0	0	0	0	0	0	0	1	0	0	0	2	0.142857	0	0	0	1.24582	1.24582	1.86962	0	0	0	1	0.500238	285.1	287.1	287.1	286.8	3	27
ILMN_2878071	Lyz	Mus musculus lysozyme (Lyz), mRNA.	4.35984	5.61	12.0535	5.29144	3.04905	3.17504	4.70606	8.14576	2.22657	10.2862	5.46738	2.96226	4.79257	4.91824	0	0	1	1	0	0	1	1	0	1	1	0	0	0	6	0.428571	0.311344	0	0	1.0787	1.39005	2.39532	0.223981	0	0	0.776019	0.663926	273.9	277.9	278.1	277.5	5.78	27
ILMN_2918312	Slc13a3	Mus musculus solute carrier family 13 (sodium-dependent dicarboxylate transporter), member 3 (Slc13a3), mRNA.	4.35584	21.0527	6.75322	2.41845	1.21467	1.40954	-1.5495	1.04906	1.47495	4.23726	5.61194	1.20706	1.57153	3.03165	0	1	0	0	0	0	0	0	0	0	0	0	0	0	1	0.0714286	0	0.064162	0	2.02408	2.08824	2.64506	0	0.030726	0	0.969274	0.437137	326.3	330.3	330.5	329.9	2.12	27
ILMN_1244167	6030458A17Rik		4.35018	2.42329	3.16872	1.1509	2.79154	1.04797	2.318	1.79564	3.41914	4.24795	1.43383	1.03592	1.15934	1.04166	1	0	0	0	0	0	0	0	0	0	0	0	0	0	1	0.0714286	0	0.004175	0	0.87189	0.876065	1.23986	0	0.004765	0	0.995235	0.474888	256.5	260.5	260.7	260.1	2.68	27
ILMN_1251625	B130064I06Rik		4.3501	3.3639	2.12738	2.00028	2.61074	-1.1108	1.69612	1.89038	1.13665	5.08895	3.18088	1.18595	1.9545	1.30948	1	0	0	0	0	0	0	0	0	0	0	0	0	0	1	0.0714286	0	0.061284	0.009749	0.870182	0.941216	1.30709	0	0.065111	0.010358	0.92453	0.5202	260.4	266.4	266.7	265.8	2.79	27
ILMN_2739250	Reep4	Mus musculus receptor accessory protein 4 (Reep4), mRNA.	4.3446	15.2517	13.7556	3.99025	3.36657	1.88717	8.09079	9.41232	3.39989	7.72874	14.0106	1.61642	6.56229	4.95396	0	1	1	0	0	0	1	1	0	0	1	0	0	0	5	0.357143	0	0	0	1.88917	1.88917	3.60425	0	0	0	1	0.606887	318.8	320.8	320.8	320.6	4.63	27
ILMN_2627140	9830001H06Rik	PREDICTED: Mus musculus RIKEN cDNA 9830001H06 gene (9830001H06Rik), mRNA.	4.34317	16.4202	11.0918	11.1739	2.69626	3.17471	3.77271	7.58106	3.37162	17.7461	5.79848	3.01884	3.67192	7.79906	0	1	1	1	0	0	0	0	0	1	0	0	0	0	4	0.285714	1.54583	0	0	2.09934	3.64517	3.795	0.424076	0	0	0.575924	0.588349	328.3	332.3	332.5	331.9	3.94	27
ILMN_1248740	Sema3f	Mus musculus sema domain, immunoglobulin domain (Ig), short basic domain, secreted, (semaphorin) 3F (Sema3f), mRNA.	4.34167	6.00307	4.40938	8.62258	3.64531	2.46737	5.13349	3.38551	3.90942	5.73688	3.64224	1.88943	3.39176	3.39164	1	1	1	1	1	0	1	0	1	1	0	0	0	0	8	0.571429	0	0	0	0.864545	0.864545	1.92225	0	0	0	1	0.662682	255.5	257.5	257.5	257.3	5.89	27
ILMN_1255925	Col8a1		4.33791	6.13445	5.84063	52.9354	7.28304	9.05099	9.81494	6.04116	3.57835	37.9615	5.67521	3.45759	5.58684	11.1134	0	0	0	1	0	0	1	0	0	1	0	0	0	0	3	0.214286	0.864518	0	0	2.35568	3.2202	4.75408	0.268467	0	0	0.731533	0.630486	337.3	341.3	341.4	340.9	4.83	27
ILMN_1221530	Adcy7		4.3331	4.39481	4.28591	9.46918	1.59092	1.58573	3.62198	1.70102	3.45641	12.4773	3.72942	3.93506	2.88546	1.00725	0	0	0	1	0	0	0	0	0	0	0	0	0	0	1	0.0714286	1.15232	0	0.083702	2.16129	3.39731	3.02934	0.339185	0	0.024638	0.636177	0.487483	333.5	339.5	339.8	338.8	2.32	27
ILMN_2643513	Asns	Mus musculus asparagine synthetase (Asns), mRNA.	4.32935	3.37862	7.79446	3.25	3.97772	1.40213	4.32236	2.64368	2.06629	5.85621	4.36309	1.7473	2.62576	2.71986	0	0	1	0	0	0	1	0	0	0	0	0	0	0	2	0.142857	0.344354	0	0	1.04121	1.38556	1.70254	0.24853	0	0	0.75147	0.543794	271.1	275.1	275.2	274.7	3.46	27
ILMN_1244609	9630032J03Rik		4.32785	10.2776	2.14154	3.57812	6.57969	-1.12521	1.18286	-1.14033	3.0638	7.1478	4.39686	1.97602	3.69037	1.30649	0	0	0	0	1	0	0	0	0	0	0	0	0	0	1	0.0714286	0	0.077039	0.014366	1.78369	1.8751	2.53499	0	0.041085	0.007662	0.951253	0.48831	317.3	323.3	323.6	322.6	2.52	27
ILMN_2681516	Slc39a6	Mus musculus solute carrier family 39 (metal ion transporter), member 6 (Slc39a6), mRNA.	4.32627	6.46074	7.77086	9.08345	4.07223	3.77506	6.63198	4.53987	2.63352	9.1983	3.5632	1.52036	4.11987	5.10086	0	1	1	1	0	0	1	0	0	1	0	0	0	0	5	0.357143	0.87924	0	0	1.08408	1.96332	2.31131	0.447834	0	0	0.552166	0.651068	274.9	278.9	279	278.4	5.48	27
ILMN_1232925	BC042423		4.32418	40.5857	10.3038	15.925	3.75455	2.19714	4.74307	5.05934	3.61496	19.5058	5.16986	2.93352	4.18386	4.89442	0	1	1	1	0	0	0	0	0	1	0	0	0	0	4	0.285714	0	0	0.112097	1.77423	1.88632	3.80884	0	0	0.059426	0.940574	0.670277	318.5	322.5	322.7	322.1	5.28	27
ILMN_2515363	Tpm4	Mus musculus tropomyosin 4 (Tpm4), mRNA.	4.31751	5.15331	7.15536	6.14903	2.97461	2.74751	5.77059	4.67333	2.79451	8.26511	4.28442	2.50808	4.60329	4.59803	1	1	1	1	0	0	1	1	0	1	1	0	0	1	9	0.642857	0.217338	0	0	0.773524	0.990863	1.96991	0.219343	0	0	0.780657	0.706937	247	251	251.1	250.5	6.9	27
ILMN_2953515	Aldh3b1	Mus musculus aldehyde dehydrogenase 3 family, member B1 (Aldh3b1), mRNA.	4.31699	2.45519	7.73137	15.5147	2.85791	2.5649	10.2983	6.86995	3.0527	9.40047	5.20735	7.6704	4.40681	4.12011	0	0	1	1	0	0	1	0	0	0	0	0	0	0	3	0.214286	0.41425	0	0	1.68054	2.09479	3.08504	0.197753	0	0	0.802247	0.593289	309.8	313.8	313.9	313.3	4.17	27
ILMN_1219074	Slfn2	Mus musculus schlafen 2 (Slfn2), mRNA.	4.31445	7.78196	15.8796	10.9351	2.07677	1.95843	6.04591	2.03598	4.05851	5.4209	3.77611	3.21377	9.32282	5.70839	0	0	1	1	0	0	0	0	0	0	0	0	0	0	2	0.142857	0.151654	0	0	1.87503	2.02669	3.28458	0.074829	0	0	0.925171	0.572696	318.3	322.3	322.5	321.9	3.92	27
ILMN_2612484	Myo9b	Mus musculus myosin IXb (Myo9b), mRNA.	4.314	7.79257	8.6647	5.40053	3.62565	2.74851	4.84669	5.47165	3.39181	9.38572	5.60358	2.12263	5.46277	4.18492	0	1	1	1	0	0	1	1	0	1	1	0	0	0	7	0.5	0.243325	0	0	1.00928	1.2526	2.23131	0.194255	0	0	0.805745	0.662265	268.4	272.4	272.6	272	5.79	27
ILMN_1220975	Ptpn22	Mus musculus protein tyrosine phosphatase, non-receptor type 22 (lymphoid) (Ptpn22), mRNA.	4.31385	10.399	22.1579	23.8729	4.95945	3.9185	7.39915	5.525	4.26909	54.2882	17.9691	3.66088	6.2803	7.84972	0	0	1	1	0	0	0	0	0	1	1	0	0	0	4	0.285714	0.173887	0	0.286072	3.35666	3.81662	5.90187	0.04556	0	0.074954	0.879485	0.605024	371.8	377.8	378.1	377.2	3.65	27
ILMN_2939367	Zfp608	Mus musculus zinc finger protein 608 (Zfp608), mRNA. XM_001000874 XM_001000888 XM_001000902 XM_001000914 XM_993937 XM_993952 XM_993993 XM_994038 XM_994057 XM_994076	4.31295	6.44956	4.3075	3.53059	2.20598	1.73201	2.68109	1.95196	3.18329	4.50606	4.43305	1.96544	2.79549	3.28688	1	1	1	1	0	0	0	0	1	1	1	0	0	0	7	0.5	0.013301	0	0	0.583094	0.596395	1.23664	0.022303	0	0	0.977697	0.647688	221.1	225.1	225.2	224.7	5.41	27
ILMN_1252675	D230019G01Rik		4.3116	4.31372	1.03559	2.63007	3.05849	1.26265	1.12737	-1.26105	2.21208	11.9458	7.32282	1.7467	2.08681	2.09265	0	0	0	0	0	0	0	0	0	1	1	0	0	0	2	0.142857	0.800917	0	0.724305	1.25403	2.77925	2.42956	0.288177	0	0.260611	0.451212	0.719034	317.4	323.4	323.8	322.8	2.3	27
ILMN_2774007	Bub1b		4.30892	3.55241	3.77369	8.97741	4.73479	2.54802	3.59552	4.30153	3.03793	5.06876	4.89641	2.23323	1.53844	3.85136	0	0	0	1	0	0	0	0	0	0	0	0	0	0	1	0.0714286	1.02222	0	0	1.33704	2.35926	2.18961	0.433281	0	0	0.566719	0.545652	291.8	295.8	296	295.4	3.42	27
ILMN_2561472	A530021P12Rik		4.30877	1.16121	1.86219	-1.08017	-1.16586	-1.04422	3.93826	-1.07122	1.06757	-1.30273	1.30303	2.23888	1.06656	1.45446	1	0	0	0	0	0	1	0	0	0	0	0	0	0	2	0.142857	0	0	0.010021	0.573866	0.583887	0.76239	0	0	0.017162	0.982838	0.444992	223.7	227.7	227.8	227.2	2.23	27
ILMN_2711948	LOC100047619	PREDICTED: Mus musculus similar to solute carrier family 7 (cationic amino acid transporter, y+ system), member 5 (LOC100047619), misc RNA.	4.30228	28.6064	5.17291	13.1923	5.32869	1.94457	5.50751	4.16098	3.76883	7.07714	4.07422	1.92379	4.78803	7.43573	0	1	0	1	0	0	1	0	0	0	0	0	0	0	3	0.214286	0	0	0	1.49918	1.49918	2.9993	0	0	0	1	0.625117	300	302	302.1	301.8	5	27
ILMN_2573401	C430026P20Rik		4.29624	1.88753	2.0547	-1.02368	4.3673	1.25551	1.85428	-1.39951	1.53696	1.41128	1.57653	-1.0834	1.09622	1.1573	1	0	0	0	1	0	0	0	0	0	0	0	0	0	2	0.142857	0.524227	0	0.248595	0.855462	1.62828	1.29521	0.321951	0	0.152673	0.525376	0.598376	273.9	279.9	280.2	279.3	1.57	27
ILMN_1259290	Akt3	Mus musculus thymoma viral proto-oncogene 3 (Akt3), mRNA.	4.29431	-1.16959	3.09862	3.35121	4.05202	1.25547	3.77538	3.80771	2.14399	3.67285	4.13798	2.06344	2.57963	6.05083	1	0	0	0	1	0	1	0	0	0	1	0	0	1	5	0.357143	0	0	0.103105	0.785897	0.889002	1.47692	0	0	0.115979	0.884021	0.642564	257.2	261.2	261.3	260.8	4.04	27
ILMN_2596611	Clic1		4.28509	4.37991	19.7451	5.99658	3.06269	2.63961	10.1938	5.69028	5.82349	11.8589	5.91601	1.06267	11.7395	6.31785	0	0	1	0	0	0	1	0	0	1	0	0	1	0	4	0.285714	0	0	0	1.76704	1.76704	3.45287	0	0	0	1	0.616181	313.4	315.4	315.4	315.2	4.82	27
ILMN_2639155	Prcp	Mus musculus prolylcarboxypeptidase (angiotensinase C) (Prcp), mRNA.	4.2816	7.22585	9.79639	5.16748	3.78156	2.95555	5.39275	6.56172	3.58812	10.4577	8.08403	2.08215	5.13548	5.1935	0	1	1	1	0	0	1	1	0	1	1	0	0	0	7	0.5	0.546271	0	0	1.07719	1.62346	2.42367	0.336487	0	0	0.663513	0.668898	274.1	278.1	278.2	277.6	5.96	27
ILMN_3154581	Gngt2	Mus musculus guanine nucleotide binding protein (G protein), gamma transducing activity polypeptide 2 (Gngt2), transcript variant 1, mRNA.	4.27456	3.44945	16.799	6.91831	2.51497	7.02537	5.48625	5.69235	6.64049	19.2066	7.7224	1.78202	6.39569	8.52224	0	0	1	1	0	0	0	0	0	1	0	0	0	0	3	0.214286	0	0	0	1.9286	1.9286	3.70869	0	0	0	1	0.609983	320.5	322.5	322.5	322.2	4.69	27
ILMN_2477213	LOC100045240	PREDICTED: Mus musculus hypothetical protein LOC100045240 (LOC100045240), mRNA.	4.27359	11.2772	2.22669	3.10067	2.06674	1.50846	1.65783	1.53501	1.36659	3.72765	3.3938	4.66083	4.86127	3.20329	0	1	0	0	0	0	0	0	0	0	0	0	0	0	1	0.0714286	0	0	0.136616	1.12205	1.25867	2.28046	0	0	0.10854	0.89146	0.667256	285.4	289.4	289.6	289	4.28	27
ILMN_2589615	Ptrh1	Mus musculus peptidyl-tRNA hydrolase 1 homolog (S. cerevisiae) (Ptrh1), mRNA.	4.26257	1.62781	7.14359	5.32972	8.49904	1.36964	5.87366	3.99287	2.05791	4.15688	3.83599	1.45748	4.42926	3.52525	0	0	0	0	1	0	0	0	0	0	0	0	0	0	1	0.0714286	0.419676	0	0.033802	1.64687	2.10035	2.65184	0.199812	0	0.016093	0.784094	0.545435	309.7	315.7	316.1	315.1	3.17	27
ILMN_2731989	Ext1	Mus musculus exostoses (multiple) 1 (Ext1), mRNA.	4.26198	6.03784	6.15774	4.46884	3.32229	2.53964	5.65795	3.35596	3.61855	8.19702	3.54995	2.05319	4.15649	3.42185	1	1	1	1	1	0	1	0	1	1	1	0	0	0	9	0.642857	0.076575	0	0	0.668571	0.745146	1.67281	0.102765	0	0	0.897235	0.701028	234.9	238.9	239	238.5	6.94	27
ILMN_2652857	Ifi47	Mus musculus interferon gamma inducible protein 47 (Ifi47), mRNA.	4.25387	8.3861	40.7817	2.91016	4.44893	-1.02819	5.98462	11.8077	2.10642	7.61794	3.77506	1.05218	2.72615	3.93697	0	0	1	0	0	0	1	1	0	0	0	0	0	0	3	0.214286	1.63265	0	0.180127	1.67826	3.49103	3.5842	0.467669	0	0.051597	0.480734	0.682336	318.1	324.1	324.5	323.5	4.54	27
ILMN_2724595	Spata6	Mus musculus spermatogenesis associated 6 (Spata6), mRNA.	4.25247	1.61645	15.499	2.21656	7.95278	4.91435	8.72092	1.00944	4.51187	7.32722	4.92313	2.0407	3.67404	7.77859	0	0	1	0	1	0	1	0	0	0	0	0	0	0	3	0.214286	0	0	0	1.92406	1.92405	3.16666	0	0	0	1	0.544302	320.3	322.3	322.3	322.1	3.58	27
ILMN_1232495	LOC100044177	PREDICTED: Mus musculus hypothetical protein LOC100044177 (LOC100044177), mRNA.	4.24974	4.94853	16.6572	5.47447	1.90435	2.39591	9.02708	2.14831	2.4696	7.92714	6.39126	-1.30315	2.56478	3.04299	0	0	1	0	0	0	0	0	0	0	0	0	0	0	1	0.0714286	0	0	0	2.87138	2.87138	3.52693	0	0	0	1	0.389402	352.7	354.7	354.7	354.5	1.91	27
ILMN_2482571	Flnb		4.24077	7.52365	7.21638	15.25	4.36542	3.26278	4.569	3.03086	3.13511	8.14925	4.18652	2.5947	3.58697	3.85156	0	1	1	1	0	0	0	0	0	1	0	0	0	0	4	0.285714	0	0	0	1.26634	1.26634	2.60207	0	0	0	1	0.634999	286.4	288.4	288.4	288.2	5.22	27
ILMN_2698430	Bcl2l1	Mus musculus BCL2-like 1 (Bcl2l1), nuclear gene encoding mitochondrial protein, mRNA.	4.23218	5.91837	6.27276	3.55907	2.57859	1.16346	1.58513	1.73782	2.54	5.96312	2.25879	1.96136	-1.34338	1.85395	0	0	1	0	0	0	0	0	0	0	0	0	0	0	1	0.0714286	0.607798	0.030914	0.069863	1.02761	1.73618	1.69625	0.350078	0.017806	0.040239	0.591877	0.582466	277.1	285.1	285.7	284.3	2.85	27
ILMN_3061260	Adora3	Mus musculus adenosine A3 receptor (Adora3), transcript variant 1, mRNA.	4.23027	3.44348	5.40802	2.21376	-1.35928	2.13624	3.47468	1.54861	2.03939	6.26827	2.28256	1.00746	2.89922	1.98848	0	0	1	0	0	0	0	0	0	1	0	0	0	0	2	0.142857	0	0	0	1.04875	1.04875	1.49664	0	0	0	1	0.474451	271.1	273.1	273.2	272.9	2.71	27
ILMN_1226979	LOC100042970	PREDICTED: Mus musculus similar to Kifc1 protein (LOC100042970), mRNA.	4.22873	6.33832	8.15509	7.13503	3.90488	3.18038	8.7603	4.61194	3.43393	10.4679	4.35946	1.51423	3.91687	4.9755	0	0	1	1	0	0	1	0	0	1	0	0	0	0	4	0.285714	0.394773	0	0	1.52096	1.91573	2.72192	0.206069	0	0	0.793931	0.582865	301.7	305.7	305.8	305.3	4.09	27
ILMN_1242946	LOC629364	PREDICTED: Mus musculus similar to actin related protein 2/3 complex, subunit 5 (LOC629364), mRNA.	4.22617	5.02782	17.3096	12.8902	3.03068	4.60795	8.43191	2.66304	3.34515	6.73432	3.09352	11.3947	12.8017	10.5337	0	0	1	1	0	0	0	0	0	0	0	0	0	0	2	0.142857	0.329271	0	0	2.48956	2.81883	4.27264	0.116811	0	0	0.883189	0.564266	341.4	345.4	345.6	345	3.55	27
ILMN_1215951	Mical1	Mus musculus microtubule associated monoxygenase, calponin and LIM domain containing 1 (Mical1), mRNA.	4.22566	7.19868	18.5796	17.2172	7.40839	3.69622	4.05016	7.56754	3.91761	20.2086	7.74519	3.3563	6.80974	8.69594	0	0	1	1	0	0	0	0	0	1	0	0	0	0	3	0.214286	0.076266	0	0	2.3576	2.43386	4.33104	0.031335	0	0	0.968665	0.592091	336.8	340.8	340.9	340.4	4.29	27
ILMN_2784230	St8sia4	Mus musculus ST8 alpha-N-acetyl-neuraminide alpha-2,8-sialyltransferase 4 (St8sia4), mRNA.	4.22529	2.4561	5.46482	4.25612	2.33002	2.20603	3.09397	2.58157	1.96573	4.29205	3.11013	1.92338	2.26488	2.96353	1	0	1	1	0	0	1	0	0	1	0	0	0	0	5	0.357143	0.134925	0.05479	0.017399	0.607879	0.814993	1.27565	0.165553	0.067228	0.021349	0.74587	0.664164	233.6	241.6	242.1	240.7	4.83	27
ILMN_1239663	Igf1r	Mus musculus insulin-like growth factor I receptor (Igf1r), mRNA.	4.22434	12.2993	3.72974	2.24616	3.26486	1.58104	5.18621	1.40029	6.117	3.74544	2.41036	2.11365	1.3325	-1.25589	0	1	0	0	0	0	1	0	1	0	0	0	0	0	3	0.214286	0	0	0.086248	1.22274	1.30899	2.21584	0	0	0.065889	0.934111	0.611784	288.9	292.9	293	292.5	3.85	27
ILMN_2469320	2610319H10Rik		4.21892	16.4449	1.0151	5.5366	2.09455	-1.10644	1.5805	1.06085	1.19709	4.11978	4.57208	2.89601	2.47255	3.06621	0	1	0	1	0	0	0	0	0	0	0	0	0	0	2	0.142857	0	0	0.306394	1.03718	1.34357	2.28007	0	0	0.228045	0.771955	0.722723	289.1	293.1	293.2	292.7	4.09	27
ILMN_2926842	Flrt2	Mus musculus fibronectin leucine rich transmembrane protein 2 (Flrt2), mRNA.	4.21702	7.71589	5.03416	5.81186	7.86584	1.89839	7.4532	4.00749	3.83047	12.5885	5.96636	3.66658	2.7102	3.93119	0	0	0	1	1	0	1	0	0	1	0	0	0	0	4	0.285714	0	0	0	1.52239	1.52239	2.95053	0	0	0	1	0.613021	301.3	303.3	303.3	303.1	4.75	27
ILMN_1239390	A130001G05Rik		4.21644	5.42654	6.24045	2.79475	2.55645	1.22046	2.07449	1.62611	3.10434	14.0426	6.81092	2.63541	6.7652	6.35624	0	0	1	0	0	0	0	0	0	1	1	0	0	0	3	0.214286	0.592388	0.007561	0.114006	1.28827	2.00222	2.24666	0.295865	0.003776	0.056939	0.643419	0.606201	295.4	303.4	303.9	302.6	3.49	27
ILMN_2752966	Tlr4	Mus musculus toll-like receptor 4 (Tlr4), mRNA.	4.21607	6.87376	32.3961	13.5978	17.3991	3.37977	21.6027	15.9884	2.3273	33.0589	3.44965	1.99218	3.62228	2.95498	0	0	1	1	1	0	1	1	0	1	0	0	0	0	6	0.428571	0	0	0	2.07033	2.07033	4.58498	0	0	0	1	0.661341	326.2	328.2	328.2	328	5.86	27
ILMN_2855334	Gusb	Mus musculus glucuronidase, beta (Gusb), mRNA.	4.21089	5.27328	9.0648	5.38684	3.9475	2.92214	4.99291	4.54987	3.00536	12.1442	5.86569	1.79985	4.47607	4.14479	0	0	1	1	1	0	1	0	0	1	1	0	0	0	6	0.428571	0.344178	0	0	0.988887	1.33306	2.16624	0.258185	0	0	0.741815	0.659519	266.9	270.9	271.1	270.5	5.7	27
ILMN_1245994	Flna	Mus musculus filamin, alpha (Flna), mRNA. XM_920635 XM_920660	4.20936	3.8935	5.90976	5.3397	2.35522	2.00503	4.01161	3.13279	3.30337	8.61131	3.75542	1.98732	3.63285	4.68638	1	0	1	1	0	0	1	0	0	1	1	0	0	1	7	0.5	0.229307	0	0	0.697526	0.926832	1.56901	0.247409	0	0	0.752591	0.668366	238.6	242.6	242.8	242.2	5.89	27
ILMN_2914938	F13a1	Mus musculus coagulation factor XIII, A1 subunit (F13a1), mRNA.	4.20586	5.11677	13.3182	3.3318	4.6443	2.46169	4.80182	5.8284	2.69085	10.2807	7.73405	2.53345	4.16303	2.19641	0	0	1	0	0	0	0	0	0	1	1	0	0	0	3	0.214286	0.188307	0	0	1.35601	1.54432	2.59422	0.121935	0	0	0.878065	0.609156	292.2	296.2	296.4	295.8	4.4	27
ILMN_1241892	Sod3	Mus musculus superoxide dismutase 3, extracellular (Sod3), mRNA.	4.20411	4.55758	7.28864	5.64315	1.74858	1.33763	5.67303	2.08031	2.1194	4.99136	4.61818	2.2875	4.9038	3.2074	0	0	1	1	0	0	1	0	0	0	0	0	0	0	3	0.214286	0	0.033703	0	1.15378	1.18749	1.99521	0	0.028382	0	0.971618	0.574238	280.7	284.7	284.8	284.3	3.83	27
ILMN_2953513	Aldh3b1	Mus musculus aldehyde dehydrogenase 3 family, member B1 (Aldh3b1), mRNA.	4.1953	10.8043	22.5339	9.81889	2.3925	7.85603	7.44122	12.152	1.62607	34.8221	15.1204	7.99097	8.657	7.57008	0	0	1	1	0	0	1	1	0	1	1	0	0	0	6	0.428571	1.04616	0	0	1.83359	2.87975	4.22804	0.36328	0	0	0.63672	0.677038	317.2	321.2	321.4	320.8	6.13	27
ILMN_1217331	Mcm6	Mus musculus minichromosome maintenance deficient 6 (MIS5 homolog, S. pombe) (S. cerevisiae) (Mcm6), mRNA.	4.19102	9.69921	10.9049	3.03509	5.36055	3.65159	5.04523	5.24357	1.79881	5.0248	3.95403	7.22985	3.98552	5.42689	0	0	1	0	0	0	0	0	0	0	0	0	0	0	1	0.0714286	0	0	0	1.89146	1.89146	3.09681	0	0	0	1	0.541918	318.9	320.9	320.9	320.7	3.55	27
ILMN_2718217	Tubb6	Mus musculus tubulin, beta 6 (Tubb6), mRNA.	4.19022	4.01259	5.46757	5.44707	3.2323	2.88671	4.99339	2.84879	2.50732	4.85386	3.19746	2.2017	4.05809	4.39532	1	0	1	1	0	0	1	0	0	1	0	0	0	1	6	0.428571	0	0	0	0.784987	0.784987	1.63617	0	0	0	1	0.640172	247.6	249.6	249.7	249.4	5.34	27
ILMN_2418366	6720427H10Rik		4.18877	2.49314	1.45284	2.12514	2.21223	-1.48244	1.84201	1.36035	2.73691	3.44786	3.53418	2.43866	2.03783	-1.05532	1	0	0	0	0	0	0	0	0	0	0	0	0	0	1	0.0714286	0.513072	0	0	0.850584	1.36366	1.16993	0.376247	0	0	0.623753	0.458658	255	259	259.2	258.6	2.13	27
ILMN_2491182	A130010C12Rik		4.1839	26.0624	4.37786	5.90681	2.68381	1.45218	3.31103	2.48075	2.02592	6.163	6.18694	3.8084	4.90811	3.32493	0	1	0	1	0	0	0	0	0	0	1	0	0	0	3	0.214286	0	0	0	1.28834	1.28834	2.64454	0	0	0	1	0.634622	287.8	289.8	289.8	289.6	5.21	27
ILMN_1225234	2310004H21Rik		4.17833	16.1128	2.02543	2.14718	2.42449	-1.1766	1.97099	2.45734	1.73588	2.14246	5.94129	3.42099	3.56434	4.6255	0	1	0	0	0	0	0	0	0	0	0	0	0	0	1	0.0714286	2.34648	0	0	1.83575	4.18223	2.5205	0.56106	0	0	0.43894	0.45881	317.8	321.8	322	321.4	2.06	27
ILMN_1228320	Cfp	Mus musculus complement factor properdin (Cfp), mRNA.	4.17666	7.08499	12.5701	4.17212	3.48394	2.05292	3.072	4.53735	2.65642	9.66118	7.27867	2.93494	3.11248	2.67938	0	0	1	0	0	0	0	0	0	1	1	0	0	0	3	0.214286	0	0	0.067772	1.34844	1.41621	2.45547	0	0	0.047855	0.952145	0.606977	295.3	299.3	299.5	298.9	4.08	27
ILMN_2422982	Synpo		4.1695	6.35019	3.45611	4.0636	2.21275	2.65029	3.82352	2.87832	3.04196	5.65633	3.32816	1.42698	3.69575	3.33966	1	1	1	1	0	0	1	0	1	1	1	0	1	1	10	0.714286	0.156227	0	0	0.486152	0.642379	1.28039	0.2432	0	0	0.7568	0.716738	209.4	213.4	213.5	213	7.34	27
ILMN_2588882	Slc41a2	Mus musculus solute carrier family 41, member 2 (Slc41a2), mRNA.	4.16539	2.44421	13.7404	19.4215	3.44069	3.23312	7.06319	8.13011	6.56843	9.44489	6.11128	4.46936	5.81025	4.49501	0	0	1	1	0	0	1	0	0	0	0	0	0	0	3	0.214286	1.90619	0	0.129977	1.93245	3.96861	3.76695	0.480316	0	0.032751	0.486933	0.640953	326.8	332.8	333.2	332.2	4.34	27
ILMN_1217241	Klhl25	Mus musculus kelch-like 25 (Drosophila) (Klhl25), mRNA.	4.16257	2.52007	3.54313	3.94641	1.53366	1.60954	8.07588	2.03796	3.45764	1.64425	4.38598	1.03141	1.40795	3.30953	0	0	0	0	0	0	1	0	0	0	0	0	0	0	1	0.0714286	0	0	0.032666	1.58834	1.621	2.18961	0	0	0.020152	0.979848	0.466706	306.4	310.4	310.5	309.9	2.42	27
ILMN_2517290	Impact	Mus musculus imprinted and ancient (Impact), mRNA.	4.16149	6.8416	1.90135	4.16311	5.70284	-1.00413	3.2163	1.85398	2.05982	8.10568	5.61165	4.53421	4.9231	1.65904	0	1	0	1	1	0	0	0	0	1	1	0	0	0	5	0.357143	0	0	0	1.02379	1.02379	1.9027	0	0	0	1	0.596446	269.2	271.2	271.2	270.9	4.43	27
ILMN_2681057	Phca	Mus musculus phytoceramidase, alkaline (Phca), mRNA.	4.16012	5.10602	10.151	5.71629	3.22871	3.31578	7.17789	4.02252	2.20763	8.56567	4.55342	1.75764	5.47883	3.10188	1	0	1	1	0	0	1	0	0	1	1	0	1	0	7	0.5	0.321825	0	0	0.847723	1.16955	2.09945	0.275171	0	0	0.724829	0.698918	254.5	258.5	258.7	258.1	6.53	27
ILMN_2755668	Apbb1ip	Mus musculus amyloid beta (A4) precursor protein-binding, family B, member 1 interacting protein (Apbb1ip), mRNA.	4.15256	9.69473	14.7826	8.48092	6.52329	4.982	12.6361	10.245	1.99265	29.3563	6.56275	1.79828	10.7066	7.42475	0	0	1	0	0	0	1	0	0	1	0	0	0	0	3	0.214286	1.24701	0	0	2.60657	3.85357	4.46286	0.323598	0	0	0.676402	0.56481	345.6	349.6	349.8	349.2	3.76	27
ILMN_2915689	Dhx58	Mus musculus DEXH (Asp-Glu-X-His) box polypeptide 58 (Dhx58), mRNA.	4.15105	7.14632	16.5058	7.34346	3.40638	4.34114	5.40465	5.26889	2.04066	20.9537	7.05844	1.87256	5.32384	6.82908	0	0	1	0	0	0	0	0	0	1	0	0	0	0	2	0.142857	1.87148	0	0	2.88839	4.75987	4.28339	0.393179	0	0	0.606821	0.498016	354.1	358.1	358.2	357.7	2.87	27
ILMN_1252611	G630019A19Rik		4.13575	4.52547	4.27715	2.95218	4.87398	-1.27852	3.93074	-1.32698	4.74395	11.1541	4.74728	3.87864	3.31559	2.35592	0	0	0	0	0	0	0	0	0	1	0	0	0	0	1	0.0714286	0.868437	0	0	1.80388	2.67232	2.60472	0.324975	0	0	0.675025	0.483986	315.8	319.8	319.9	319.4	2.47	27
ILMN_2989955	Bmp1	Mus musculus bone morphogenetic protein 1 (Bmp1), mRNA.	4.13432	5.30052	8.1404	4.82343	3.71098	3.76644	5.98952	3.35328	3.40127	9.58116	5.32073	2.2491	6.08124	4.95368	0	0	1	1	0	0	1	0	0	1	1	0	1	0	6	0.428571	0.213329	0	0	0.937164	1.15049	2.14987	0.185424	0	0	0.814576	0.674463	262.4	266.4	266.6	266	5.95	27
ILMN_2615015	Pygl	Mus musculus liver glycogen phosphorylase (Pygl), mRNA.	4.13267	2.8372	21.5628	4.59651	2.5119	1.80607	4.45005	2.0663	2.41469	3.08656	2.30617	-1.10813	1.94199	4.15596	0	0	1	0	0	0	0	0	0	0	0	0	0	0	1	0.0714286	0	0	0	1.87853	1.87853	2.55496	0	0	0	1	0.448563	318.3	320.3	320.4	320.1	2.44	27
ILMN_1247823	Lrp8	Mus musculus low density lipoprotein receptor-related protein 8, apolipoprotein e receptor (Lrp8), transcript variant 2, mRNA.	4.13188	7.12604	7.44024	3.44184	3.79253	1.42208	3.95144	2.08273	2.93055	6.62215	2.26302	1.21968	3.35148	1.05292	0	1	1	0	0	0	0	0	0	0	0	0	0	0	2	0.142857	0	0	0	1.18224	1.18224	1.9285	0	0	0	1	0.540223	280.8	282.8	282.9	282.6	3.52	27
ILMN_2958159	Eno1	Mus musculus enolase 1, alpha non-neuron (Eno1), mRNA.	4.13153	5.3145	5.1923	6.68737	2.9897	2.36072	5.52571	3.22892	3.3139	5.85634	3.62586	1.76002	3.75167	3.16113	1	1	1	1	0	0	1	0	0	1	0	0	0	0	6	0.428571	0.036106	0	0	0.762836	0.798942	1.70697	0.045193	0	0	0.954807	0.66524	245.4	249.4	249.6	249	5.84	27
ILMN_2975718	Rps6ka1	Mus musculus ribosomal protein S6 kinase polypeptide 1 (Rps6ka1), mRNA.	4.13117	11.0372	6.59512	5.63744	2.66475	2.41421	3.47781	3.87931	2.97017	6.98342	4.87863	1.48538	4.03229	3.23345	0	1	1	1	0	0	0	0	0	1	1	0	0	0	5	0.357143	0	0	0	1.02497	1.02497	2.01289	0	0	0	1	0.618099	269.2	271.2	271.3	271	4.86	27
ILMN_1224736	Zmiz1	Mus musculus zinc finger, MIZ-type containing 1 (Zmiz1), mRNA.	4.13024	14.1468	2.2539	4.08552	2.40297	1.33663	2.19826	6.35746	3.097	8.52539	6.62674	-1.04077	2.58757	3.2441	0	1	0	0	0	0	0	0	0	0	0	0	0	0	1	0.0714286	0	0	0.390875	1.8476	2.23847	3.11442	0	0	0.174617	0.825383	0.621641	331.3	335.3	335.5	334.9	2.82	27
ILMN_2634235	Lrrc33	Mus musculus leucine rich repeat containing 33 (Lrrc33), mRNA.	4.12945	4.55137	8.92994	4.5299	3.6606	2.16918	4.43397	4.34114	2.6899	13.8332	6.35581	2.32488	3.7707	2.93081	0	0	1	1	0	0	1	0	0	1	1	0	0	0	5	0.357143	0.410421	0	0.132623	0.993006	1.53605	2.26253	0.267192	0	0.08634	0.646468	0.707102	276.9	282.9	283.2	282.2	5.31	27
ILMN_2648732	LOC100048710	PREDICTED: Mus musculus hypothetical protein LOC100048710 (LOC100048710), mRNA.	4.12859	1.74589	4.9221	1.13307	2.46611	2.20431	-1.00595	1.44558	-1.03056	1.12295	1.32313	1.42526	1.1607	1.39115	1	0	1	0	0	0	0	0	0	0	0	0	0	0	2	0.142857	0	0.013839	0	0.717628	0.731466	1.00257	0	0.018919	0	0.981081	0.470591	241.7	245.7	245.8	245.3	2.53	27
ILMN_2606295	Gch1	Mus musculus GTP cyclohydrolase 1 (Gch1), mRNA.	4.12545	2.93976	8.77683	3.80269	3.75814	2.17811	5.92428	2.86384	2.79366	4.60915	2.89909	2.18805	5.03259	2.66348	1	0	1	1	1	0	1	0	0	1	0	0	1	0	7	0.5	0	0.018113	0	0.656973	0.675086	1.61951	0	0.02683	0	0.97317	0.701129	235	239	239.1	238.6	6.77	27
ILMN_2733356	Endod1	Mus musculus endonuclease domain containing 1 (Endod1), mRNA.	4.12516	5.12718	5.33015	4.69206	3.12921	2.54237	4.90176	4.17413	3.67913	7.03313	3.38223	1.75106	3.87698	4.67876	1	1	1	1	0	0	1	1	1	1	0	0	0	1	9	0.642857	0.279563	0	0	0.687383	0.966946	1.63098	0.28912	0	0	0.71088	0.68581	237.6	241.6	241.7	241.1	6.42	27
ILMN_2814484	Ifitm1	Mus musculus interferon induced transmembrane protein 1 (Ifitm1), mRNA.	4.12473	3.19666	9.81015	4.31661	-1.35446	1.23591	2.7227	-1.0193	2.12403	1.9304	2.08089	1.81249	4.21004	1.56273	0	0	1	1	0	0	0	0	0	0	0	0	0	0	2	0.142857	0	0	0.059873	1.05213	1.112	1.66287	0	0	0.053843	0.946157	0.549756	275.7	279.7	279.9	279.3	3.06	27
ILMN_1242767	Dok1	Mus musculus docking protein 1 (Dok1), mRNA.	4.1203	9.44467	7.15611	5.01643	3.60805	1.30425	3.37966	1.83334	-1.06525	6.95251	3.91531	2.38075	4.07669	-1.32492	0	1	1	0	0	0	0	0	0	0	0	0	0	0	2	0.142857	0	0	0	1.40407	1.40407	2.13268	0	0	0	1	0.506229	294.7	296.7	296.8	296.5	3.08	27
ILMN_2694960	Msn	Mus musculus moesin (Msn), mRNA.	4.11488	12.8103	4.21732	12.3986	3.02832	2.09943	7.70481	9.04801	1.80663	4.85902	3.92903	7.65481	8.55855	3.03662	0	1	0	1	0	0	1	1	0	0	0	0	0	0	4	0.285714	0	0	0	1.77063	1.77063	3.5258	0	0	0	1	0.623355	313.5	315.5	315.6	315.3	4.97	27
ILMN_1256735	Gus-s		4.10093	3.28312	10.1654	3.48993	1.8945	2.55345	6.11825	5.38072	1.89541	5.97291	4.60484	1.95172	4.34212	4.84196	0	0	1	0	0	0	1	0	0	0	0	0	0	0	2	0.142857	0.931639	0	0	1.4591	2.39074	2.52355	0.389686	0	0	0.610314	0.569558	298.8	302.8	302.9	302.4	3.64	27
ILMN_1237644	P2rx4	Mus musculus purinergic receptor P2X, ligand-gated ion channel 4 (P2rx4), mRNA.	4.09383	5.63077	14.1728	8.89158	4.72423	3.36673	7.25774	9.80709	2.33271	36.0977	10.3661	1.72967	10.0496	5.67869	0	0	1	1	0	0	0	0	0	1	1	0	0	0	4	0.285714	1.55539	0	0	2.23992	3.79531	4.14583	0.409818	0	0	0.590182	0.597881	333.5	337.5	337.7	337.1	4.12	27
ILMN_2661971	Gm2a	Mus musculus GM2 ganglioside activator protein (Gm2a), mRNA.	4.09255	5.14094	6.27983	4.23946	2.47993	1.90425	4.02425	3.90399	2.77525	5.09	3.81359	1.93735	3.53947	2.72913	1	1	1	1	0	0	1	1	0	1	1	0	0	0	8	0.571429	1.15e-18	0	0	0.662271	0.662271	1.44842	1.73e-18	0	0	1	0.657073	233.9	235.9	235.9	235.7	5.75	27
ILMN_2657175	Anxa2	Mus musculus annexin A2 (Anxa2), mRNA.	4.09035	5.97967	9.76943	6.34377	3.37597	3.08667	6.1864	5.47373	3.1543	10.8223	5.80331	2.32128	5.32249	4.6911	0	1	1	1	0	0	1	1	0	1	1	0	1	1	9	0.642857	0.099764	0	0	0.837454	0.937218	2.16397	0.106447	0	0	0.893553	0.710531	253.1	257.1	257.3	256.7	7.27	27
ILMN_2663258	Clecsf12		4.09021	5.74564	20.0336	4.68659	1.68345	4.06097	14.0923	-1.21693	2.62213	4.52976	1.90086	2.1495	6.44107	4.11265	0	0	1	0	0	0	1	0	0	0	0	0	0	0	2	0.142857	0.292733	0	0	1.57241	1.86514	3.04924	0.156949	0	0	0.843051	0.614692	304.3	308.3	308.4	307.9	4.08	27
ILMN_2906688	Anks6	Mus musculus ankyrin repeat and sterile alpha motif domain containing 6 (Anks6), mRNA.	4.08879	2.75032	1.60111	2.20393	5.08363	4.45052	4.41049	1.77584	10.3109	9.21659	3.85665	1.20593	1.30701	6.83038	0	0	0	0	0	0	0	0	1	0	0	0	0	0	1	0.0714286	0	0	0	1.71653	1.71653	2.55912	0	0	0	1	0.496938	311	313	313.1	312.8	2.96	27
ILMN_1220039	Kif4	Mus musculus kinesin family member 4 (Kif4), mRNA.	4.08405	5.66104	6.67584	1.96758	2.24868	1.21453	1.97449	2.27801	1.17393	4.95597	3.67622	-1.22006	3.09907	2.20125	0	0	1	0	0	0	0	0	0	0	0	0	0	0	1	0.0714286	0	0	0.143512	1.45976	1.60328	2.04327	0	0	0.089512	0.910488	0.508347	305.2	309.2	309.3	308.8	2.2	27
ILMN_2684205	4930431B09Rik	PREDICTED: Mus musculus RIKEN cDNA 4930431B09 gene (4930431B09Rik), misc RNA.	4.08164	12.1614	20.1502	4.99498	6.99314	1.19659	6.55429	6.10176	7.8437	5.22392	10.6322	2.65842	11.2602	8.96254	0	0	1	0	0	0	0	0	0	0	1	0	0	0	2	0.142857	0	0	0	2.27025	2.27025	3.90408	0	0	0	1	0.56387	333.7	335.7	335.7	335.5	3.88	27
ILMN_2695793	Fes	Mus musculus feline sarcoma oncogene (Fes), mRNA.	4.07719	6.16272	9.06464	7.53663	3.29464	2.60616	6.66008	5.60193	4.04248	9.05637	17.6837	2.14327	5.08706	4.69744	0	0	1	1	0	0	1	0	0	1	1	0	0	0	5	0.357143	0	0	0	1.37141	1.37141	2.87849	0	0	0	1	0.642673	292.8	294.8	294.9	294.6	5.4	27
ILMN_1222071	C920004C08Rik		4.07507	15.2912	6.69241	6.91496	3.99734	1.46734	3.61631	2.69279	2.82878	9.12189	4.49377	1.54614	1.85922	5.46552	0	1	0	1	0	0	0	0	0	0	0	0	0	0	2	0.142857	0.176743	0	0	1.74655	1.92329	2.64113	0.091896	0	0	0.908104	0.505202	312.6	316.6	316.8	316.2	2.97	27
ILMN_1253797	Slit2	Mus musculus slit homolog 2 (Drosophila) (Slit2), mRNA.	4.07415	6.30662	5.27145	3.29459	2.82232	5.82144	8.14424	6.36573	3.49904	9.65918	4.72667	3.69704	6.94288	9.13012	0	0	0	0	0	0	1	0	0	0	0	0	0	1	2	0.142857	0.429883	0	0	1.68003	2.10992	3.11325	0.203744	0	0	0.796256	0.597139	309.7	313.7	313.9	313.3	4.25	27
ILMN_2736197	2610307O08Rik	PREDICTED: Mus musculus RIKEN cDNA 2610307O08 gene, transcript variant 12 (2610307O08Rik), mRNA.	4.06562	3.86893	2.41249	1.70166	2.40404	-1.25782	5.19211	3.0522	3.18874	9.13793	10.5659	2.53128	3.32311	3.70959	0	0	0	0	0	0	1	0	0	1	1	0	0	0	3	0.214286	0.959551	0	0.132288	1.39502	2.48686	2.23735	0.385849	0	0.053195	0.560956	0.5726	302.1	308.1	308.4	307.5	2.97	27
ILMN_1225994	Vav2	Mus musculus vav 2 oncogene (Vav2), mRNA.	4.06315	11.6175	7.54019	18.2297	7.09204	3.16329	3.7251	4.33055	4.2603	10.9716	7.56951	1.99552	2.81936	3.63089	0	1	0	1	1	0	0	0	0	1	0	0	0	0	4	0.285714	0	0	0	1.78894	1.78894	3.26359	0	0	0	1	0.588887	314.4	316.4	316.4	316.2	4.3	27
ILMN_2690396	Nradd	Mus musculus neurotrophin receptor associated death domain (Nradd), mRNA.	4.05872	1.30664	5.99164	4.5855	2.4426	1.13548	4.30812	-1.29868	3.52076	3.4	1.79922	1.04296	1.55999	1.6539	0	0	1	1	0	0	0	0	0	0	0	0	0	0	2	0.142857	0	0	0	1.16775	1.16775	1.85635	0	0	0	1	0.528207	279.8	281.8	281.9	281.6	3.36	27
ILMN_1226997	Rassf2	Mus musculus Ras association (RalGDS/AF-6) domain family member 2 (Rassf2), mRNA.	4.05478	11.8411	12.1188	5.32463	3.44762	1.99858	10.5064	2.58515	2.71939	7.70805	5.44875	3.86151	4.14556	4.4865	0	0	1	0	0	0	1	0	0	0	0	0	0	0	2	0.142857	1.91602	0	0	2.44979	4.36581	3.6371	0.43887	0	0	0.56113	0.498863	340.9	344.9	345	344.4	2.86	27
ILMN_1230327	LOC383099		4.04426	5.46227	8.44809	5.33016	3.9038	2.75523	5.47113	4.40892	2.69754	8.90532	4.57081	2.56371	4.69514	4.40581	0	1	1	1	1	0	1	1	0	1	1	0	0	0	8	0.571429	0	0	0	0.861919	0.861919	1.99624	0	0	0	1	0.676171	255.2	257.2	257.3	257	6.26	27
ILMN_1260020	Pcdh1	Mus musculus protocadherin 1 (Pcdh1), mRNA.	4.04307	11.1415	3.40458	8.16481	2.69421	2.99738	1.93659	5.06197	3.58066	6.06931	2.94496	1.01787	1.61451	3.28536	0	1	0	1	0	0	0	0	0	0	0	0	0	0	2	0.142857	0	0	0	1.14154	1.14154	2.03113	0	0	0	1	0.579797	274.8	276.8	276.8	276.6	4.09	27
ILMN_2599751	Rabep2	Mus musculus rabaptin, RAB GTPase binding effector protein 2 (Rabep2), mRNA.	4.03327	4.41894	11.3672	3.84686	5.6981	2.79549	3.19829	4.30921	3.10359	11.4201	7.38783	-1.5226	3.71699	3.62578	0	0	1	0	0	0	0	0	0	0	0	0	0	0	1	0.0714286	0	0	0	1.89348	1.89348	2.81686	0	0	0	1	0.495854	319	321	321	320.8	2.95	27
ILMN_2749958	LOC676420	PREDICTED: Mus musculus similar to ceramide kinases (LOC676420), misc RNA.	4.03082	4.95116	6.41423	5.31158	2.96395	2.87622	4.31907	3.82504	3.11573	10.058	5.04254	2.16852	3.30321	3.96041	0	0	1	1	0	0	1	0	0	1	1	0	0	0	5	0.357143	0.147874	0	0	0.845748	0.993623	1.82993	0.148823	0	0	0.851177	0.654608	254	258	258.2	257.6	5.58	27
ILMN_1237723	Lrp1	Mus musculus low density lipoprotein receptor-related protein 1 (Lrp1), mRNA.	4.02789	4.62216	5.99319	7.91978	2.09932	4.89446	6.55402	2.32854	3.61058	10.1223	4.38788	1.34182	2.44409	6.33151	0	0	0	1	0	0	1	0	0	0	0	0	0	0	2	0.142857	0.056481	0	0	1.85346	1.90994	3.01991	0.029572	0	0	0.970428	0.540068	317.3	321.3	321.5	320.9	3.33	27
ILMN_2653972	Cenpt	Mus musculus centromere protein T (Cenpt), mRNA.	4.02726	5.02004	4.42599	3.60295	3.91817	2.07567	3.60505	4.48249	2.02326	4.36253	3.19087	1.03268	3.38104	3.12508	1	1	1	1	1	0	1	1	0	1	0	0	0	0	8	0.571429	0.890661	0	0	0.678729	1.56939	1.43876	0.567521	0	0	0.432479	0.649485	237.3	241.3	241.4	240.8	5.31	27
ILMN_1250757	1110002H13Rik	Mus musculus RIKEN cDNA 1110002H13 gene (1110002H13Rik), mRNA.	4.0244	2.59326	2.06644	1.02915	1.0888	1.2065	-1.38367	1.73733	-1.00667	-1.03615	1.42781	1.1689	1.08388	-1.45491	1	0	0	0	0	0	0	0	0	0	0	0	0	0	1	0.0714286	0	0	0.053653	0.412254	0.465906	0.658429	0	0	0.115157	0.884843	0.580494	202.6	206.6	206.7	206.2	2.67	27
ILMN_2761900	Batf	Mus musculus basic leucine zipper transcription factor, ATF-like (Batf), mRNA.	4.01883	4.70024	9.82904	9.10387	3.7426	4.01396	2.82588	1.88868	1.212	6.80943	6.33832	1.10803	2.05371	1.85623	0	0	1	1	0	0	0	0	0	0	0	0	0	0	2	0.142857	0	0.008766	0	1.85771	1.86647	2.74922	0	0.004697	0	0.995303	0.49539	317.8	321.8	321.9	321.4	2.9	27
ILMN_2712066	Pgd		4.01792	5.11086	5.83527	4.83877	3.94619	2.182	4.59607	3.64325	3.66804	5.2014	4.40617	1.59357	3.59627	3.08104	1	1	1	1	1	0	1	0	1	1	1	0	0	0	9	0.642857	0	0	0	0.73013	0.73013	1.60105	0	0	0	1	0.657976	241.8	243.8	243.8	243.6	5.77	27
ILMN_1243902	A530024C08Rik		4.01751	1.9758	1.84274	1.03291	3.83493	1.55111	1.32022	1.49381	1.66084	2.42727	1.22145	1.14928	-1.02702	1.25582	1	0	0	0	1	0	0	0	0	0	0	0	0	0	2	0.142857	0.659811	0	0	0.644762	1.30457	0.868056	0.505768	0	0	0.494232	0.447774	232.9	236.9	237.1	236.5	2.21	27
ILMN_1236517	Il18	Mus musculus interleukin 18 (Il18), mRNA.	4.01646	1.25246	14.5065	1.01551	3.62988	-1.06533	4.22046	1.45849	-1.31752	7.84424	5.49797	3.495	4.18598	3.60979	0	0	1	0	0	0	0	0	0	0	0	0	0	0	1	0.0714286	0.786712	0	0	2.02315	2.80986	2.97198	0.279982	0	0	0.720018	0.492442	325	329	329.1	328.6	2.52	27
ILMN_1259967	Prl2c2	Mus musculus prolactin family 2, subfamily c, member 2 (Prl2c2), mRNA.	4.00708	11.7279	92.9205	67.5442	13.3248	43.6663	258.711	39.6397	69.3392	241.632	31.0302	5.31069	97.9427	15.7153	0	0	1	1	0	1	1	1	1	1	1	0	1	0	9	0.642857	0.881366	0	0	4.38851	5.26987	11.7367	0.167246	0	0	0.832754	0.720669	387.4	391.4	391.6	391	7.59	27
ILMN_2595714	Fn1	Mus musculus fibronectin 1 (Fn1), mRNA.	4.00597	45.617	37.3368	109.938	8.93446	7.01382	17.5473	19.4595	3.84141	66.5761	10.1908	25.3023	32.8685	14.1382	0	1	1	1	0	0	1	1	0	1	0	0	1	0	7	0.5	1.4551	0	0	3.61149	5.06659	8.77696	0.287196	0	0	0.712804	0.693242	371.9	375.9	376.1	375.5	6.14	27
ILMN_1250815	Wsb1	Mus musculus WD repeat and SOCS box-containing 1 (Wsb1), transcript variant 2, mRNA.	4.00534	4.59288	7.22151	3.54086	2.84648	2.11844	3.92796	2.09682	2.35429	5.2503	3.02571	1.90019	3.05937	2.51529	1	1	1	1	1	0	1	0	0	1	1	0	0	0	8	0.571429	0.833575	0	0	0.499067	1.33264	1.26651	0.625505	0	0	0.374495	0.707366	212.5	216.5	216.7	216.1	7.01	27
ILMN_2724409	Fem1c	Mus musculus fem-1 homolog c (C.elegans) (Fem1c), mRNA.	4.00492	5.1059	3.7579	2.41928	3.85802	2.41689	6.24127	2.57541	-1.05267	2.07086	3.33376	-1.87308	3.34862	3.39844	0	0	0	0	0	0	1	0	0	0	0	0	0	0	1	0.0714286	0.558892	0.026202	0	1.00666	1.59175	1.80606	0.351118	0.016461	0	0.632421	0.591896	270.3	276.3	276.6	275.7	3.56	27
ILMN_2788574	Gmip	Mus musculus Gem-interacting protein (Gmip), mRNA.	4.00409	29.1461	17.1879	5.6647	3.0507	2.01374	3.22643	6.21509	2.9477	7.20534	16.533	-1.15706	6.22483	4.88604	0	1	1	0	0	0	0	0	0	0	1	0	0	0	3	0.214286	0	0	0	1.79615	1.79615	3.44599	0	0	0	1	0.609078	314.7	316.7	316.7	316.5	4.67	27
ILMN_1234223	Pld4	Mus musculus phospholipase D family, member 4 (Pld4), mRNA.	4	19.1956	31.0495	15.2329	5.81315	5.60601	9.30174	12.9253	4.75882	33.5428	18.9674	2.92415	8.8073	5.29085	0	1	1	1	0	0	1	1	0	1	1	0	0	0	7	0.5	0	0	0	2.44735	2.44735	5.04315	0	0	0	1	0.636039	339.7	341.7	341.8	341.5	5.24	27
ILMN_2770609	LOC100047268	PREDICTED: Mus musculus similar to Immediate early response 5-like (LOC100047268), mRNA.	3.99965	17.7015	7.46349	7.77563	3.96	5.9907	8.5139	7.68796	3.71957	21.9143	10.5349	2.73518	5.92699	13.2904	0	1	0	1	0	0	1	0	0	1	1	0	0	1	6	0.428571	0	0	0	2.1288	2.1288	4.04973	0	0	0	1	0.605751	328.5	330.5	330.5	330.2	4.61	27
ILMN_2721761	Nab1	Mus musculus Ngfi-A binding protein 1 (Nab1), mRNA.	3.99834	-1.08553	9.57485	1.87221	8.07935	1.29	1.85297	-1.89957	4.34663	3.30046	3.81862	3.16127	1.8184	3.4999	0	0	1	0	1	0	0	0	0	0	0	0	0	0	2	0.142857	0	0	0.029868	1.25941	1.28928	2.00033	0	0	0.023167	0.976833	0.5385	287.8	291.8	292	291.4	3.25	27
ILMN_1222060	Arhgef5	PREDICTED: Mus musculus Rho guanine nucleotide exchange factor (GEF) 5 (Arhgef5), mRNA.	3.99778	2.20513	1.96513	4.16062	1.91377	1.05916	-1.39707	1.38927	-1.18025	-1.44273	1.56569	1.02147	1.60507	2.65505	1	0	0	1	0	0	0	0	0	0	0	0	0	0	2	0.142857	0.149084	0	0.484522	0.778054	1.41166	1.32628	0.105609	0	0.343229	0.551162	0.684223	280.1	286.1	286.4	285.5	1.57	27
ILMN_1245864	Ifitm5	Mus musculus interferon induced transmembrane protein 5 (Ifitm5), mRNA.	3.99453	1.68199	2.77724	1.36419	1.04398	1.74385	3.33004	1.41984	1.33593	2.66272	2.6308	1.31864	2.48963	-1.00789	1	0	0	0	0	0	1	0	0	0	0	0	0	0	2	0.142857	0	0	0	0.615601	0.615601	0.907147	0	0	0	1	0.491041	228	230	230	229.7	2.89	27
ILMN_1217446	5830467E07Rik		3.99211	-1.11448	1.68133	1.42296	1.5516	1.05431	2.63748	1.15593	1.18523	1.30336	2.36154	-1.10035	1.29924	1.03992	1	0	0	0	0	0	0	0	0	0	0	0	0	0	1	0.0714286	0	0	0	0.510682	0.510682	0.654442	0	0	0	1	0.41475	212.8	214.8	214.9	214.6	2.13	27
ILMN_1218116	Bmp1	Mus musculus bone morphogenetic protein 1 (Bmp1), mRNA.	3.99162	4.84255	7.87975	6.588	5.22938	3.39327	5.372	5.07277	2.52185	11.3795	4.17615	2.36364	4.31352	5.65388	0	0	1	1	1	0	1	0	0	1	0	0	0	0	5	0.357143	0.137897	0	0	1.183	1.3209	2.50918	0.104396	0	0	0.895604	0.647333	281.1	285.1	285.3	284.7	5.19	27
ILMN_1243290	Eya3	Mus musculus eyes absent 3 homolog (Drosophila) (Eya3), transcript variant 1, mRNA.	3.9901	4.43418	-1.14262	4.97127	2.81946	-1.28933	3.19297	3.61357	1.75711	2.38221	2.55784	-1.30065	2.35278	2.14929	0	0	0	1	0	0	0	0	0	0	0	0	0	0	1	0.0714286	0	0.044	0	0.968958	1.01296	1.55559	0	0.043437	0	0.956563	0.54535	264.2	268.2	268.4	267.8	3.3	27
ILMN_1237342	4833438C02Rik		3.98699	4.19441	3.67132	3.44518	1.42678	1.18454	2.31302	2.61584	1.14065	10.5057	3.97196	-1.03714	2.20101	1.25195	0	0	0	0	0	0	0	0	0	1	0	0	0	0	1	0.0714286	0	0	0	1.08863	1.08863	1.53482	0	0	0	1	0.468034	274.1	276.1	276.2	275.9	2.64	27
ILMN_1230423	Sh3pxd2b	Mus musculus SH3 and PX domains 2B (Sh3pxd2b), mRNA.	3.98374	7.6109	7.98463	3.83312	5.49485	2.58448	4.26634	6.25463	3.21801	12.3397	5.91642	2.25511	5.30162	3.68379	0	1	1	0	1	0	1	1	0	1	1	0	0	0	7	0.5	0.304668	0	0	1.04616	1.35083	2.26484	0.225541	0	0	0.774459	0.655295	271.4	275.4	275.6	275	5.55	27
ILMN_2764205	Tor1a	Mus musculus torsin family 1, member A (torsin A) (Tor1a), mRNA.	3.98154	1.04119	9.34552	3.18643	2.1265	3.03564	4.61017	1.01751	1.72688	10.9886	3.35236	1.7324	1.62537	2.57742	0	0	1	0	0	0	0	0	0	0	0	0	0	0	1	0.0714286	0.134813	0	0	1.85979	1.9946	2.5131	0.067589	0	0	0.932411	0.445966	317.7	321.7	321.8	321.2	2.21	27
ILMN_1222315	LOC100047167	PREDICTED: Mus musculus similar to mKIAA0990 protein (LOC100047167), mRNA.	3.97947	3.06418	7.68929	4.74372	2.66456	3.08394	5.85034	2.75199	2.07671	6.0451	3.10168	1.99257	3.35831	2.6724	1	0	1	1	0	0	1	0	0	1	0	0	0	0	5	0.357143	0	0	0	0.72584	0.72584	1.50592	0	0	0	1	0.638508	241.3	243.3	243.3	243.1	5.3	27
ILMN_2595408	Pld1		3.97168	3.72085	3.52159	5.24303	3.28529	1.57543	4.31733	3.50448	7.10885	4.76277	8.30886	5.07032	3.00632	2.6107	0	0	0	1	0	0	0	0	1	0	1	0	0	0	3	0.214286	0	0	0.420987	1.27227	1.69326	2.57337	0	0	0.248626	0.751374	0.703715	307.4	311.4	311.6	311	3.76	27
ILMN_2687561	Cxcr7	Mus musculus chemokine (C-X-C motif) receptor 7 (Cxcr7), mRNA.	3.97031	5.15843	3.74133	1.88991	2.75059	1.00457	1.33145	1.91305	1.90088	9.04216	3.41622	2.06921	2.43614	-1.51482	0	0	0	0	0	0	0	0	0	1	0	0	0	0	1	0.0714286	0	0	0	1.08034	1.08034	1.64756	0	0	0	1	0.508209	273.5	275.5	275.6	275.3	3.1	27
ILMN_1240445	Stard4	Mus musculus StAR-related lipid transfer (START) domain containing 4 (Stard4), mRNA.	3.96749	3.26949	1.78169	5.8639	1.61281	-1.35635	2.9094	1.11307	-1.05934	3.53285	11.9141	1.67122	2.5018	2.64673	0	0	0	1	0	0	0	0	0	0	1	0	0	0	2	0.142857	3.06247	0	0.436992	1.23348	4.73294	2.26275	0.647054	0	0.09233	0.260616	0.679159	307.6	313.6	313.9	312.9	2.38	27
ILMN_2595519	Lig1	Mus musculus ligase I, DNA, ATP-dependent (Lig1), transcript variant 2, mRNA.	3.96247	4.45729	7.65247	9.71612	4.02687	3.6747	1.83643	3.72296	8.40463	6.43363	7.72682	2.31333	3.91018	10.9247	0	0	0	1	0	0	0	0	1	0	0	0	0	0	2	0.142857	0.786866	0	0	2.06997	2.85683	3.30687	0.275433	0	0	0.724567	0.533255	326.8	330.8	331	330.4	3.32	27
ILMN_2866856	H2-DMa	Mus musculus histocompatibility 2, class II, locus DMa (H2-DMa), mRNA.	3.96062	6.01473	9.23268	3.6568	2.54344	1.50082	3.85315	3.32251	1.92575	4.94053	5.09559	-1.0039	3.23642	3.77329	0	0	1	0	0	0	0	0	0	0	1	0	0	0	2	0.142857	1.12524	0	0.103382	1.04934	2.27796	1.91933	0.493969	0	0.045384	0.460647	0.626733	279.6	285.6	285.9	285	3.84	27
ILMN_2691538	Bcr	Mus musculus breakpoint cluster region homolog (Bcr), mRNA.	3.95191	9.45274	2.93396	5.31504	1.16672	2.48621	1.80976	1.43776	2.41191	6.05881	8.88502	1.7707	6.64391	3.53931	0	0	0	0	0	0	0	0	0	0	1	0	0	0	1	0.0714286	0	0	0	1.63697	1.63697	2.24035	0	0	0	1	0.451993	307.2	309.2	309.2	309	2.47	27
ILMN_1227086	Pik3cg	Mus musculus phosphoinositide-3-kinase, catalytic, gamma polypeptide (Pik3cg), mRNA.	3.94767	20.9997	31.5797	7.67773	3.03169	3.19176	5.92354	10.3584	1.89701	12.4433	9.69809	2.58871	7.42247	4.91032	0	0	1	0	0	0	0	0	0	0	0	0	0	0	1	0.0714286	0	0	0	3.08841	3.08841	4.52719	0	0	0	1	0.488357	358.6	360.6	360.6	360.4	2.86	27
ILMN_2749595	2610204M08Rik	Mus musculus RIKEN cDNA 2610204M08 gene (2610204M08Rik), mRNA.	3.9463	9.15631	7.10902	15.9435	6.39649	2.16445	12.5694	7.82193	14.7655	6.38373	8.17546	7.31412	17.9457	3.49201	0	0	0	1	0	0	1	0	1	0	0	0	1	0	4	0.285714	0.386598	0	0	2.37236	2.75896	4.65801	0.140125	0	0	0.859875	0.619319	337.5	341.5	341.7	341.1	4.68	27
ILMN_1218240	Cd69	Mus musculus CD69 antigen (Cd69), mRNA. XM_925572	3.94548	6.25872	11.1404	-1.52963	3.21594	-2.01457	2.96481	2.86766	3.2376	4.88525	10.657	2.36534	1.51509	2.74583	0	0	1	0	0	0	0	0	0	0	0	0	0	0	1	0.0714286	0	0	0	2.41974	2.41974	3.40219	0	0	0	1	0.466577	338.8	340.8	340.9	340.6	2.62	27
ILMN_2737463	Ccdc88b	Mus musculus coiled-coil domain containing 88B (Ccdc88b), mRNA.	3.94493	1.75796	13.2576	2.8813	4.1848	1.58373	3.09663	1.22175	2.89002	6.50658	7.4719	2.02863	3.65397	7.03549	0	0	1	0	0	0	0	0	0	0	1	0	0	0	2	0.142857	0	0	0.002231	1.6201	1.62233	2.55633	0	0	0.001375	0.998625	0.525332	306.4	310.4	310.6	310	3.31	27
ILMN_1259528	LOC382092		3.93612	3.72206	7.3698	3.43755	3.14596	2.03394	5.00177	4.42883	3.17298	6.61894	4.3793	1.84762	3.61059	3.16031	1	0	1	1	0	0	1	1	0	1	1	0	0	0	7	0.5	0.245452	0	0	0.725067	0.970519	1.67638	0.252908	0	0	0.747092	0.677378	241.8	245.8	245.9	245.4	5.92	27
ILMN_1247592	Casp1	Mus musculus caspase 1 (Casp1), mRNA.	3.92448	5.9114	25.8264	6.87052	5.19355	2.32157	7.52838	7.81597	3.25885	14.327	8.90182	2.51219	4.09454	3.7948	0	0	1	1	1	0	1	1	0	1	1	0	0	0	7	0.5	0.608537	0	0	1.39816	2.0067	3.13873	0.303253	0	0	0.696747	0.667988	295.1	299.1	299.3	298.7	5.87	27
ILMN_1255570	Atp6v1a	Mus musculus ATPase, H+ transporting, lysosomal V1 subunit A (Atp6v1a), mRNA.	3.92101	2.48797	3.74691	2.93255	1.63937	1.13646	3.74374	1.15379	1.55577	2.47512	2.1231	1.56588	1.89378	2.4507	1	0	1	0	0	0	1	0	0	0	0	0	0	0	3	0.214286	0	0	0.08009	0.610447	0.690536	0.9888	0	0	0.115982	0.884018	0.586671	234.1	238.1	238.2	237.6	2.97	27
ILMN_2705235	BC067047	Mus musculus cDNA sequence BC067047 (BC067047), mRNA. XM_902966 XM_902967 XM_902969 XM_914522 XM_923276 XM_923283 XM_923288 XM_923292 XM_923299 XM_923308 XM_983285	3.91931	7.60932	4.67908	11.229	2.16361	2.07621	6.39613	2.6192	2.13498	4.8297	7.84474	1.60893	3.59668	1.96107	0	0	0	1	0	0	1	0	0	0	1	0	0	0	3	0.214286	0	0	0	1.47325	1.47325	2.4894	0	0	0	1	0.556142	298.6	300.6	300.7	300.4	3.76	27
ILMN_2608811	Cbr3	Mus musculus carbonyl reductase 3 (Cbr3), mRNA.	3.91497	4.61043	8.44677	7.12377	2.90291	2.44109	4.61087	5.93491	2.80933	8.32894	1.84888	6.17256	3.90422	6.6367	0	0	1	1	0	0	0	0	0	0	0	0	0	0	2	0.142857	0.22498	0	0	1.64956	1.87454	2.90087	0.120018	0	0	0.879982	0.574788	308.1	312.1	312.2	311.7	3.83	27
ILMN_2614531	Mcam	Mus musculus melanoma cell adhesion molecule (Mcam), mRNA.	3.91476	2.85396	3.39762	1.8022	2.02778	1.83112	1.95548	3.15196	2.60572	2.51903	2.95468	1.05483	2.4428	2.47907	1	0	1	0	0	0	0	1	0	0	1	0	0	0	4	0.285714	0.21261	0	0	0.474416	0.687026	0.864835	0.309464	0	0	0.690536	0.591175	207.6	211.6	211.7	211.2	4.18	27
ILMN_1231012	Lcp2	Mus musculus lymphocyte cytosolic protein 2 (Lcp2), mRNA.	3.90636	9.82438	20.388	9.02558	2.12464	1.78825	4.75868	2.95852	5.54734	25.5839	10.5225	2.32481	10.9152	5.35273	0	0	1	1	0	0	0	0	0	1	1	0	0	0	4	0.285714	1.21844	0	0.141072	2.13458	3.4941	3.94653	0.348714	0	0.040374	0.610912	0.6205	334.5	340.5	340.8	339.9	3.9	27
ILMN_2744121	LOC100040525	PREDICTED: Mus musculus similar to G protein-coupled receptor 178 (LOC100040525), misc RNA.	3.90514	7.24742	5.23549	6.67524	4.36929	2.94007	5.55043	2.93574	2.11484	4.93916	5.03512	1.11276	6.64483	2.17634	0	1	0	1	0	0	1	0	0	0	0	0	0	0	3	0.214286	0	0.026281	0	1.21105	1.23733	2.16369	0	0.02124	0	0.97876	0.586531	284.2	288.2	288.4	287.8	4.11	27
ILMN_2744380	Npc2	Mus musculus Niemann Pick type C2 (Npc2), mRNA.	3.90426	2.50602	13.1296	3.51197	6.89457	2.75786	4.52005	3.33255	2.78092	8.61709	4.75469	1.68624	4.1562	4.6706	0	0	1	0	1	0	0	0	0	1	0	0	0	0	3	0.214286	0.068861	0	0	1.23942	1.30828	2.37556	0.052635	0	0	0.947365	0.609252	284.8	288.8	288.9	288.3	4.41	27
ILMN_1213886	Meox1	Mus musculus mesenchyme homeobox 1 (Meox1), mRNA.	3.90156	5.02411	9.27839	8.38308	5.99633	3.26255	6.19919	3.9991	4.98914	16.0485	1.81803	2.39015	2.10162	7.51028	0	0	1	1	0	0	1	0	0	1	0	0	0	0	4	0.285714	0.03676	0	0	1.72714	1.7639	3.31831	0.02084	0	0	0.97916	0.609863	311.6	315.6	315.7	315.1	4.56	27
ILMN_1256219	LOC100047261	PREDICTED: Mus musculus similar to spermidine/spermine N1-acetyltransferase (LOC100047261), misc RNA.	3.89852	3.65786	7.85058	4.14652	3.09504	2.15857	4.54632	2.93427	2.4852	6.85109	4.20637	2.27811	5.26828	3.5094	1	0	1	1	0	0	1	0	0	1	1	0	1	0	7	0.5	0.324162	0	0	0.768671	1.09283	1.73024	0.296625	0	0	0.703375	0.668847	246.6	250.6	250.8	250.2	5.68	27
ILMN_2753492	Ripk1	Mus musculus receptor (TNFRSF)-interacting serine-threonine kinase 1 (Ripk1), mRNA.	3.89217	3.64537	6.218	4.14003	7.28021	2.14901	3.1885	5.3223	2.22027	6.01042	4.91069	3.8079	4.03751	2.80013	0	0	1	1	1	0	0	1	0	1	1	0	0	0	6	0.428571	0.401885	0	0	0.946826	1.34871	1.94792	0.297977	0	0	0.702023	0.637687	263.5	267.5	267.7	267.1	5.09	27
ILMN_2645390	Pak2	Mus musculus p21 (CDKN1A)-activated kinase 2 (Pak2), mRNA.	3.88536	2.87773	3.45539	3.09286	4.72174	1.59135	3.93324	1.52364	2.17969	3.25074	1.99588	-1.14124	1.82121	1.50099	0	0	0	0	1	0	1	0	0	0	0	0	0	0	2	0.142857	0	0	0	0.841134	0.841134	1.40618	0	0	0	1	0.551373	253.2	255.2	255.3	255	3.69	27
ILMN_2792601	P2ry5	Mus musculus purinergic receptor P2Y, G-protein coupled, 5 (P2ry5), mRNA.	3.882	3.44181	3.64735	3.3718	2.89941	2.90603	2.81579	3.53087	2.23059	3.73386	3.96893	2.09045	2.38893	2.32639	0	0	0	0	0	0	0	0	0	0	1	0	0	0	1	0.0714286	0.018182	0	0	0.77627	0.794451	1.32344	0.022886	0	0	0.977114	0.560367	246.8	250.8	250.9	250.4	3.79	27
ILMN_1249339	Rab4b	Mus musculus RAB4B, member RAS oncogene family (Rab4b), mRNA.	3.87904	2.65032	5.27127	3.73296	7.17332	1.54877	2.59785	3.42113	2.86213	6.59711	3.33411	-1.0664	3.10839	2.33308	0	0	0	0	1	0	0	0	0	0	0	0	0	0	1	0.0714286	0.102802	0	0	1.35766	1.46046	2.04205	0.07039	0	0	0.92961	0.502285	292.2	296.2	296.3	295.8	2.99	27
ILMN_2536676	LOC383981		3.87857	6.51742	9.88164	7.18755	4.37214	2.49822	6.40092	5.83062	2.68404	10.9124	4.8848	2.49658	4.6626	4.23805	0	1	1	1	1	0	1	1	0	1	1	0	0	0	8	0.571429	0.296224	0	0	0.902996	1.19922	2.30545	0.247014	0	0	0.752986	0.707813	259.6	263.6	263.7	263.1	6.93	27
ILMN_1225182	Cdca3	Mus musculus cell division cycle associated 3 (Cdca3), mRNA.	3.87414	2.10448	4.49493	6.25097	2.38584	1.61748	2.34912	10.9037	2.22946	10.6209	7.7869	1.30823	1.47997	2.58605	0	0	0	1	0	0	0	1	0	1	1	0	0	0	4	0.285714	0	0	0	1.59957	1.59957	2.49221	0	0	0	1	0.51863	305.3	307.3	307.4	307.1	3.23	27
ILMN_1229246	Spata2L	Mus musculus spermatogenesis associated 2-like (Spata2L), mRNA.	3.87266	7.30947	1.24347	3.40907	3.25821	1.27282	4.95739	5.06917	3.32254	4.94899	3.40865	-2.49963	4.65581	2.08906	0	0	0	0	0	0	1	0	0	0	0	0	0	0	1	0.0714286	0.66631	0.02242	0.028537	1.34114	2.05841	2.0613	0.323702	0.010892	0.013864	0.651543	0.530638	294.6	302.6	303.1	301.7	2.92	27
ILMN_1223070	Chst11	Mus musculus carbohydrate sulfotransferase 11 (Chst11), mRNA.	3.87152	1.98073	3.84258	2.87245	2.39668	1.87592	2.39861	1.61975	2.80036	1.801	3.38792	1.12275	4.16726	2.66608	1	0	1	0	0	0	0	0	0	0	0	0	0	0	2	0.142857	0	0	0.135433	0.738386	0.873819	1.28439	0	0	0.15499	0.84501	0.627024	255.4	259.4	259.5	259	3.22	27
ILMN_2927025	Sdcbp	Mus musculus syndecan binding protein (Sdcbp), mRNA.	3.87004	5.68884	6.50884	4.54009	2.77753	2.10555	5.05363	3.69961	2.39604	5.76598	4.06999	2.20463	3.73817	2.82634	1	1	1	1	0	0	1	1	0	1	1	0	0	0	8	0.571429	0.067523	0	0	0.587715	0.655238	1.49732	0.103051	0	0	0.896949	0.706384	224.4	228.4	228.6	228	7.06	27
ILMN_1247135	Zfp276		3.86951	1.87328	1.58513	1.00033	1.67528	1.37078	1.21132	2.82647	2.08117	1.51243	2.24288	1.34243	1.10468	-1.35037	1	0	0	0	0	0	0	0	0	0	0	0	0	0	1	0.0714286	0	0	0	0.650124	0.650124	0.769868	0	0	0	1	0.366654	232.4	234.4	234.4	234.2	1.74	27
ILMN_2700550	Ddx11		3.86843	4.80854	5.13024	3.4925	3.50322	-1.00219	3.95764	2.0243	5.95248	8.06198	2.29207	-1.20346	6.95845	2.48847	0	0	0	0	0	0	0	0	1	0	0	0	0	0	1	0.0714286	0	0	0	1.4585	1.4585	2.1237	0	0	0	1	0.484921	297.8	299.8	299.9	299.6	2.82	27
ILMN_2621643	Col4a1	Mus musculus procollagen, type IV, alpha 1 (Col4a1), mRNA.	3.86716	6.24297	3.73854	5.3852	2.48575	2.46669	3.61692	3.62568	2.9076	7.45926	3.67349	2.59968	4.25257	3.59943	1	1	1	1	0	0	1	1	0	1	1	0	0	0	8	0.571429	0	0	0	0.68077	0.68077	1.6849	0	0	0	1	0.696968	236.1	238.1	238.2	237.9	6.9	27
ILMN_2710312	LOC100046650	PREDICTED: Mus musculus similar to PRELI domain containing 1 (LOC100046650), mRNA.	3.86488	5.37811	6.95162	5.90747	3.10338	2.55655	5.97219	4.00263	2.45541	6.99311	3.84851	2.03329	3.76504	2.99105	0	1	1	1	0	0	1	0	0	1	0	0	0	0	5	0.357143	0.900958	0	0	0.878737	1.7797	1.92084	0.506243	0	0	0.493757	0.659881	258	262	262.2	261.6	5.47	27
ILMN_2827729	Calb2	Mus musculus calbindin 2 (Calb2), mRNA.	3.86267	2.89829	9.68734	2.87863	-1.28674	1.406	5.18312	1.02772	1.42495	2.57612	2.51194	1.09558	1.39545	2.41925	0	0	1	0	0	0	1	0	0	0	0	0	0	0	2	0.142857	0	0	0	1.33049	1.33049	1.83981	0	0	0	1	0.457624	290.4	292.4	292.4	292.2	2.53	27
ILMN_2916782	Apom	Mus musculus apolipoprotein M (Apom), mRNA.	3.8612	4.2009	10.8217	4.73584	2.91889	3.18281	5.65764	2.4044	3.46899	14.6856	3.628	3.18918	3.54242	1.52142	0	0	1	0	0	0	0	0	0	1	0	0	0	0	2	0.142857	0	0	0	1.79775	1.79776	2.68796	0	0	0	1	0.498387	314.8	316.8	316.8	316.6	2.98	27
ILMN_2546624	Nudel-pending		3.86093	10.9097	6.20971	1.93716	3.53057	1.09329	2.87145	-3.67132	1.24083	1.96514	3.80956	2.06167	3.12423	1.86827	0	1	1	0	0	0	0	0	0	0	0	0	0	0	2	0.142857	0	0	0	1.33764	1.33764	1.9304	0	0	0	1	0.480299	290.8	292.8	292.9	292.6	2.77	27
ILMN_2485340	9530018I07Rik		3.85619	5.65176	4.41266	9.2275	2.21168	1.76308	2.95083	2.52494	2.08582	3.91877	2.95181	1.4102	1.6998	1.81312	0	1	1	1	0	0	0	0	0	0	0	0	0	0	3	0.214286	0.066937	0	0.012945	0.784464	0.864345	1.49786	0.077442	0	0.014976	0.907582	0.614248	249.1	255.1	255.4	254.5	4.42	27
ILMN_2605935	EG667410	PREDICTED: Mus musculus predicted gene, EG667410 (EG667410), mRNA.	3.84964	5.28218	3.14612	2.08875	2.76949	1.63136	2.80259	4.35471	2.15766	7.01949	2.61829	2.89658	5.80019	2.52722	0	0	0	0	0	0	0	0	0	1	0	0	0	0	1	0.0714286	0	0.095635	0.052892	1.06433	1.21286	2.05793	0	0.078851	0.04361	0.877539	0.640543	280	286	286.4	285.4	4.25	27
ILMN_2967445	Itga1	Mus musculus integrin alpha 1 (Itga1), mRNA.	3.84838	2.18833	3.25859	2.5713	1.17391	-1.19263	3.01212	2.95161	4.79947	2.15821	-1.36922	2.08414	1.71896	2.31817	0	0	0	0	0	0	0	0	1	0	0	0	0	0	1	0.0714286	0	0.036829	0	0.981672	1.0185	1.37704	0	0.03616	0	0.96384	0.476713	268	272	272.2	271.6	2.49	27
ILMN_2897230	Stat6	Mus musculus signal transducer and activator of transcription 6 (Stat6), mRNA.	3.84378	4.56337	1.48919	4.39237	2.17941	1.20708	1.80085	3.06726	2.40975	2.75286	3.22333	1.92312	1.19861	2.09843	0	0	0	1	0	0	0	0	0	0	0	0	0	0	1	0.0714286	0	0	0.029622	1.1469	1.17652	1.4624	0	0	0.025178	0.974822	0.426266	280.4	284.4	284.5	284	2	27
ILMN_1259711	A230061N24Rik		3.84325	3.27236	-1.07453	2.70536	1.45385	-2.02483	2.12547	1.13124	1.6727	3.55981	3.87676	-1.15654	1.46273	1.11521	1	0	0	0	0	0	0	0	0	0	1	0	0	0	2	0.142857	0	0	0.212272	0.746857	0.959128	1.3016	0	0	0.221317	0.778683	0.648276	261.9	265.9	266.1	265.5	2.65	27
ILMN_2623983	Egr2		3.84285	2.0638	3.28359	4.50648	1.75764	1.57224	4.37566	2.33711	1.52897	8.5968	4.30332	1.54082	3.01265	11.2312	0	0	0	0	0	0	0	0	0	0	0	0	0	1	1	0.0714286	0	0	0	1.92715	1.92715	2.60274	0	0	0	1	0.444676	320.4	322.4	322.4	322.2	2.4	27
ILMN_2588227	Fn1	Mus musculus fibronectin 1 (Fn1), mRNA.	3.84171	3.19164	6.25171	5.35795	2.10523	3.27933	7.35507	1.46221	3.17282	9.5628	4.10953	2.57782	4.62782	1.92124	0	0	1	1	0	0	1	0	0	1	0	0	0	0	4	0.285714	0.005447	0	0.057301	1.20484	1.26759	2.16834	0.004297	0	0.045205	0.950498	0.601435	286	292	292.4	291.4	3.98	27
ILMN_1254975	Has2	Mus musculus hyaluronan synthase 2 (Has2), mRNA.	3.83533	7.37512	10.1399	4.04371	2.74419	9.5654	2.48251	3.88712	2.50563	9.79628	4.1341	1.46008	5.54236	4.11046	0	0	1	0	0	1	0	0	0	0	0	0	0	0	2	0.142857	0	0	0	1.81602	1.81602	2.8656	0	0	0	1	0.524702	315.6	317.6	317.6	317.4	3.31	27
ILMN_3105563	Dmkn	Mus musculus dermokine (Dmkn), transcript variant 2, mRNA.	3.83181	6.34652	17.8043	5.42672	6.89916	1.98398	9.30857	11.6995	1.22933	24.4874	5.28041	-1.69444	12.7224	3.93547	0	0	1	0	0	0	0	0	0	0	0	0	0	0	1	0.0714286	0	0	0.178106	3.25601	3.43411	5.45338	0	0	0.051864	0.948136	0.574325	367.1	371.1	371.2	370.7	3.43	27
ILMN_2714209	A330021E22Rik	Mus musculus RIKEN cDNA A330021E22 gene (A330021E22Rik), mRNA.	3.83108	1.68304	6.94019	3.3837	1.33186	-1.00926	5.80405	1.25382	1.13297	2.11238	3.29865	-1.10511	3.43299	8.83997	0	0	1	0	0	0	1	0	0	0	0	0	0	1	3	0.214286	0	0	0.071241	1.55932	1.63056	2.18908	0	0	0.043691	0.956309	0.488165	306.8	310.8	310.9	310.4	2.43	27
ILMN_2907473	Tbc1d10a	Mus musculus TBC1 domain family, member 10a (Tbc1d10a), mRNA.	3.82743	5.3994	7.19478	3.91567	3.47251	4.40411	11.9391	1.94097	2.29987	26.0426	5.69048	-2.75204	3.71853	5.99181	0	0	0	0	0	0	1	0	0	1	0	0	0	0	2	0.142857	0	0	0	2.50365	2.50365	3.56841	0	0	0	1	0.473789	341.6	343.6	343.6	343.4	2.7	27
ILMN_2767918	Ifi30	Mus musculus interferon gamma inducible protein 30 (Ifi30), mRNA.	3.82338	3.84504	8.37129	5.72819	1.98178	1.75339	3.7909	8.07927	2.5405	8.85853	2.70964	3.27891	5.28255	2.36271	0	0	1	1	0	0	0	1	0	1	0	0	0	0	4	0.285714	0	0	0	1.28312	1.28312	2.28094	0	0	0	1	0.578095	287.4	289.4	289.5	289.2	4.11	27
ILMN_2879745	Lasp1	Mus musculus LIM and SH3 protein 1 (Lasp1), mRNA.	3.81974	7.73446	2.53744	8.3513	2.72319	1.83573	3.71716	6.04011	6.57474	8.79449	4.96735	2.38742	10.3513	4.10964	0	0	0	1	0	0	0	0	0	0	0	0	0	0	1	0.0714286	0	0.030341	0	2.28388	2.31422	3.32939	0	0.013111	0	0.986889	0.4909	335.1	339.1	339.3	338.7	2.78	27
ILMN_2771237	Lbp	Mus musculus lipopolysaccharide binding protein (Lbp), mRNA.	3.81901	7.51149	20.0645	3.77653	2.34863	4.31953	8.34944	4.48109	3.30978	18.3097	6.55207	3.33062	7.68263	6.51373	0	0	1	0	0	0	1	0	0	1	0	0	0	0	3	0.214286	0.206338	0	0	1.78958	1.99592	3.51794	0.10338	0	0	0.89662	0.620672	311	315	315.1	314.6	4.41	27
ILMN_1245335	C230078M08Rik	Mus musculus RIKEN cDNA C230078M08 gene (C230078M08Rik), mRNA.	3.81875	4.44197	2.20175	-1.00142	2.50439	3.80554	1.49299	3.65241	1.75246	13.6447	5.36369	1.56523	2.1604	4.00296	0	0	0	0	0	0	0	0	0	1	0	0	0	0	1	0.0714286	0.139751	0	0.073273	1.29583	1.50886	2.04135	0.092621	0	0.048562	0.858817	0.549128	292.8	298.8	299.1	298.2	2.92	27
ILMN_2846775	Cdkn1a	Mus musculus cyclin-dependent kinase inhibitor 1A (P21) (Cdkn1a), mRNA.	3.81815	4.63531	6.29225	3.4087	7.0249	2.07211	3.76518	2.27651	2.52017	3.6833	3.33399	1.24624	1.92314	1.72805	1	1	1	1	1	0	1	0	0	1	1	0	0	0	8	0.571429	0.049972	0.027532	0	0.492148	0.569651	1.285	0.087723	0.048331	0	0.863946	0.721842	210.7	216.7	217	216.1	6.92	27
ILMN_3009469	Trip6	Mus musculus thyroid hormone receptor interactor 6 (Trip6), mRNA.	3.81703	4.06588	2.9839	1.35805	4.1398	1.16387	3.12051	2.95473	1.96656	1.61888	1.62065	1.80912	5.43771	2.4522	0	0	0	0	1	0	0	0	0	0	0	0	0	0	1	0.0714286	0	0.126102	0	0.98527	1.11137	1.65819	0	0.113465	0	0.886535	0.570218	271.2	275.2	275.3	274.7	3.4	27
ILMN_2597868	Lgmn	Mus musculus legumain (Lgmn), mRNA.	3.81663	6.25409	6.53144	6.53225	3.40988	3.56172	5.34222	4.06203	1.97363	8.54847	4.68257	2.97906	3.68671	3.40241	0	1	1	1	0	0	1	0	0	1	1	0	0	0	6	0.428571	0.385435	0	0	0.867426	1.25286	2.02612	0.307644	0	0	0.692356	0.680928	256.4	260.4	260.6	260	5.99	27
ILMN_1251845	Slc10a4	Mus musculus solute carrier family 10 (sodium/bile acid cotransporter family), member 4 (Slc10a4), mRNA.	3.8163	11.198	3.67744	1.94866	1.17007	-1.1343	-1.02359	1.33293	-1.90067	1.40036	1.47527	-1.07109	-1.03419	1.71916	1	1	1	0	0	0	0	0	0	0	0	0	0	0	3	0.214286	0	0.070365	0	0.607272	0.677637	1.11327	0	0.103839	0	0.896161	0.606377	229.1	233.1	233.2	232.7	4.17	27
ILMN_2654754	Gp38		3.81412	5.75028	7.60501	5.55551	2.88138	2.96961	6.95861	3.96666	3.14681	11.1435	6.1953	1.92338	7.82107	6.75314	0	1	1	1	0	0	1	0	0	1	1	0	1	1	8	0.571429	0.542883	0	0	0.809318	1.3522	2.16432	0.401481	0	0	0.598519	0.72166	251.1	255.1	255.2	254.6	7.58	27
ILMN_1252622	Trb		3.81055	11.4481	2.7967	3.67046	5.1068	2.15554	1.73325	2.8695	3.24326	6.93566	14.3311	2.41273	9.19022	3.9693	0	1	0	0	0	0	0	0	0	0	1	0	0	0	2	0.142857	1.21987	0	0.282214	1.80204	3.30413	3.33512	0.369195	0	0.085413	0.545392	0.64547	326.8	332.8	333.1	332.2	3.16	27
ILMN_2784950	Pld3	Mus musculus phospholipase D family, member 3 (Pld3), mRNA.	3.80785	16.1325	6.29312	6.37984	2.87508	2.25687	3.32432	8.80196	2.30427	7.57248	6.51979	5.0433	2.80999	4.27816	0	1	0	1	0	0	0	1	0	0	1	0	0	0	4	0.285714	0	0	0	1.46083	1.46083	2.64257	0	0	0	1	0.585397	298	300	300	299.7	4.24	27
ILMN_1220680	Lpin2		3.80771	3.1485	8.04281	6.40403	4.03402	-1.20648	7.49818	1.91547	2.94904	9.80148	6.41145	4.50148	4.17574	5.58304	0	0	1	1	0	0	1	0	0	1	1	0	0	0	5	0.357143	0	0	0	1.43038	1.43038	2.52167	0	0	0	1	0.574573	296.2	298.2	298.3	298	4.05	27
ILMN_2524980	H2afj	Mus musculus H2A histone family, member J (H2afj), mRNA.	3.80554	8.67642	1.54344	7.80382	2.67719	1.49617	4.09261	4.73971	-1.11478	2.1077	2.44876	-1.59429	3.10666	2.63464	0	1	0	1	0	0	0	0	0	0	0	0	0	0	2	0.142857	0	0	0	1.26448	1.26448	1.91501	0	0	0	1	0.504776	286.3	288.3	288.3	288.1	3.06	27
ILMN_2972541	Dgkq	Mus musculus diacylglycerol kinase, theta (Dgkq), mRNA.	3.80323	-1.0841	2.14418	1.74845	1.17201	-1.90716	1.34462	2.12487	1.57031	6.74569	6.40123	-1.31776	4.10666	1.51128	0	0	0	0	0	0	0	0	0	0	1	0	0	0	1	0.0714286	0	0	0	1.43984	1.43984	1.91414	0	0	0	1	0.43584	296.8	298.8	298.8	298.6	2.32	27
ILMN_2861469	Cyfip1	Mus musculus cytoplasmic FMR1 interacting protein 1 (Cyfip1), mRNA.	3.80106	6.39362	3.76213	7.41517	3.82156	1.84965	3.37924	-2.14972	-1.14471	1.05122	1.24985	4.13833	3.18266	2.20552	0	0	0	1	0	0	0	0	0	0	0	0	0	0	1	0.0714286	0	0	0	1.96985	1.96985	2.47053	0	0	0	1	0.401995	322.2	324.2	324.2	324	2.02	27
ILMN_2668236	Dos	Mus musculus downstream of Stk11 (Dos), mRNA.	3.80033	1.69439	2.95795	1.90069	7.23764	1.3659	1.528	1.65999	4.68061	7.69738	4.19123	-2.18668	1.43986	1.94082	0	0	0	0	1	0	0	0	0	1	0	0	0	0	2	0.142857	0	0	0.322385	1.15595	1.47833	1.87545	0	0	0.218074	0.781926	0.621166	297	301	301.2	300.6	2.54	27
ILMN_2879746	Lasp1	Mus musculus LIM and SH3 protein 1 (Lasp1), mRNA.	3.79711	9.29422	4.86588	4.61055	3.24788	2.11334	4.39566	4.26169	2.99752	7.40825	4.60643	2.12981	3.34359	3.21128	0	1	1	1	0	0	1	0	0	1	0	0	0	0	5	0.357143	0.038277	0	0	1.04228	1.08056	1.96092	0.035423	0	0	0.964577	0.601743	270.7	274.7	274.8	274.3	4.43	27
ILMN_2605465	Snx1	Mus musculus sorting nexin 1 (Snx1), mRNA.	3.79586	2.96356	16.8669	3.35874	4.64327	2.4084	1.73224	1.54325	4.50668	15.2559	5.98831	4.30178	4.41323	12.6329	0	0	1	0	0	0	0	0	0	0	0	0	0	0	1	0.0714286	0	0	0	2.73601	2.73601	3.98048	0	0	0	1	0.484483	348.8	350.8	350.8	350.6	2.82	27
ILMN_2742849	Mcm5	Mus musculus minichromosome maintenance deficient 5, cell division cycle 46 (S. cerevisiae) (Mcm5), mRNA.	3.79461	7.92091	14.5606	5.61926	3.67025	2.12436	3.62993	7.70369	1.33461	6.16229	4.86217	2.10466	2.76664	4.05149	0	1	1	1	0	0	0	1	0	0	0	0	0	0	4	0.285714	1.41053	0	0.156491	1.20229	2.76931	2.52119	0.509344	0	0.056509	0.434147	0.681895	292.7	298.7	299	298.1	4.75	27
ILMN_2648080	Kntc1	Mus musculus kinetochore associated 1 (Kntc1), mRNA.	3.78666	1.24272	3.34516	2.99667	2.01617	1.56092	5.27767	1.49048	2.31085	3.72627	1.28723	3.70644	1.94513	1.49645	0	0	0	0	0	0	1	0	0	0	0	0	0	0	1	0.0714286	0	0	0	1.31	1.31	1.73973	0	0	0	1	0.435255	289.1	291.1	291.2	290.9	2.31	27
ILMN_2862379	Rhod	Mus musculus ras homolog gene family, member D (Rhod), mRNA.	3.7839	5.56121	26.4643	3.26214	3.74099	3.9681	8.17489	7.97453	3.85225	20.8263	9.41362	2.69103	11.3992	9.29958	0	0	1	0	0	0	1	1	0	1	1	0	1	1	7	0.5	0	0	0.069489	1.65372	1.72321	3.70904	0	0	0.040326	0.959674	0.678585	311.3	315.3	315.4	314.9	5.76	27
ILMN_2598703	Ifnar2	Mus musculus interferon (alpha and beta) receptor 2 (Ifnar2), mRNA.	3.78213	3.54111	8.73526	3.28479	1.04329	2.38337	2.21082	2.48815	1.54405	3.02989	4.07415	1.2466	3.73403	1.61834	1	0	1	1	0	0	0	0	0	0	1	0	0	0	4	0.285714	3.03909	0	0.113643	0.729022	3.88176	1.53007	0.782916	0	0.029276	0.187807	0.688365	254.8	260.8	261.1	260.2	4.41	27
ILMN_2721466	Bnc2	Mus musculus basonuclin 2 (Bnc2), mRNA.	3.78102	4.95116	5.94664	2.02012	2.23504	3.46241	3.17184	2.11668	1.70424	5.37501	5.15501	10.0547	2.77035	1.15297	0	0	1	0	0	0	0	0	0	0	0	1	0	0	2	0.142857	0	0	0.058156	1.28738	1.34554	1.94701	0	0	0.043221	0.956779	0.524671	291.2	295.2	295.4	294.8	2.87	27
ILMN_2894587	Tlr13	Mus musculus toll-like receptor 13 (Tlr13), mRNA.	3.78063	3.17546	6.34744	5.88417	-1.3612	3.82802	4.59823	1.5609	1.38095	4.24432	5.10602	-1.81422	1.28346	5.39435	0	0	0	1	0	0	0	0	0	0	0	0	0	0	1	0.0714286	0	0	0	1.55415	1.55415	2.22282	0	0	0	1	0.475615	303	305	305	304.8	2.72	27
ILMN_1255834	Stk17b	Mus musculus serine/threonine kinase 17b (apoptosis-inducing) (Stk17b), mRNA.	3.78017	3.16674	8.66515	3.66614	2.16499	1.31503	2.80037	2.19897	1.96924	5.63142	4.45006	1.38165	3.58358	2.42117	0	0	1	0	0	0	0	0	0	0	0	0	0	0	1	0.0714286	0	0	0.004674	0.969961	0.974636	1.57522	0	0	0.004796	0.995204	0.540382	265.2	269.2	269.3	268.8	3.48	27
ILMN_2444316	Tpm3	Mus musculus tropomyosin 3, gamma (Tpm3), mRNA.	3.77945	8.12405	6.00172	6.65104	3.81256	1.67996	7.84525	4.77227	1.59989	8.06552	3.11758	6.85479	5.543	3.74001	0	1	1	1	0	0	1	0	0	1	0	0	0	0	5	0.357143	0.479073	0	0	1.17071	1.64978	2.69541	0.290385	0	0	0.709615	0.676213	280.7	284.7	284.8	284.3	5.31	27
ILMN_3006767	Mlkl	Mus musculus mixed lineage kinase domain-like (Mlkl), mRNA. XM_924589	3.77879	9.31313	17.9045	6.96605	11.4618	5.71588	8.60574	10.5279	3.51726	16.8651	5.60174	4.39608	2.44664	4.70211	0	0	1	0	1	0	1	1	0	1	0	0	0	0	5	0.357143	0	0	0	2.14967	2.14967	3.98837	0	0	0	1	0.595762	329.2	331.2	331.3	331	4.42	27
ILMN_2552983	A130052C08Rik		3.77696	27.0221	4.84635	14.3327	1.49763	1.42358	1.96066	1.06611	1.18333	4.42967	9.36838	6.43452	12.1625	5.57418	0	1	0	1	0	0	0	0	0	0	1	0	1	0	4	0.285714	0.811932	0	0.364308	1.11954	2.29578	3.26445	0.353662	0	0.158686	0.487652	0.794983	297.5	303.5	303.8	302.9	6.18	27
ILMN_1226666	Cnn2	Mus musculus calponin 2 (Cnn2), mRNA.	3.7767	3.92439	6.6287	4.21152	1.69133	1.01063	4.68426	11.5338	3.44047	8.25175	3.74898	-1.17479	2.62545	2.35211	0	0	0	0	0	0	0	1	0	0	0	0	0	0	1	0.0714286	0.574398	0	0.167402	1.63267	2.37447	2.67317	0.241906	0	0.070501	0.687594	0.582985	315.1	321.1	321.4	320.4	2.97	27
ILMN_1218393	Rac3	Mus musculus RAS-related C3 botulinum substrate 3 (Rac3), mRNA.	3.77382	2.65903	6.7722	2.48076	2.39771	2.41011	4.47802	1.28443	3.68271	3.51535	2.64717	1.4481	1.77785	1.47679	0	0	1	0	0	0	0	0	0	0	0	0	0	0	1	0.0714286	0	0	0.014781	1.25381	1.26859	1.76065	0	0	0.011651	0.988349	0.472058	286.5	290.5	290.7	290.1	2.57	27
ILMN_2599659	Fmnl3	Mus musculus formin-like 3 (Fmnl3), mRNA.	3.7733	4.74245	3.07743	4.05381	2.40011	2.25297	3.47237	3.44541	2.55792	4.94396	2.17909	1.69988	2.69173	2.29676	1	1	0	1	0	0	1	1	0	1	0	0	0	0	6	0.428571	0	0	0	0.565841	0.565841	1.17003	0	0	0	1	0.637289	221.1	223.1	223.2	222.9	5.27	27
ILMN_2775154	Ctsh		3.77062	6.73152	31.6103	10.9562	4.6707	3.98526	15.8624	21.3235	3.65699	28.6799	8.44794	2.03113	8.63562	5.8933	0	0	1	1	0	0	1	1	0	1	0	0	0	0	5	0.357143	0.298581	0	0	2.20292	2.5015	4.73317	0.119361	0	0	0.880639	0.651969	331.5	335.5	335.7	335.1	5.43	27
ILMN_2609614	Snx10	Mus musculus sorting nexin 10 (Snx10), mRNA.	3.76637	3.43879	11.4254	3.5412	3.42252	2.24218	5.36382	2.86384	1.85212	5.19179	3.15158	1.31567	2.86433	2.13465	0	0	1	1	1	0	1	0	0	1	0	0	0	0	5	0.357143	0.115911	0	0	0.786164	0.902076	1.58183	0.128494	0	0	0.871506	0.62843	248.1	252.1	252.2	251.6	4.86	27
ILMN_2987027	Plekhg2	Mus musculus pleckstrin homology domain containing, family G (with RhoGef domain) member 2 (Plekhg2), mRNA.	3.76467	7.94162	2.128	5.91181	2.2224	1.53858	2.49427	2.70724	2.78866	4.20382	3.84918	2.74237	3.52584	3.3999	1	1	0	1	0	0	0	0	0	0	1	0	0	0	4	0.285714	0.216116	0	0.074391	0.695205	0.985712	1.48542	0.219249	0	0.075469	0.705282	0.682452	243.4	249.4	249.7	248.7	4.71	27
ILMN_1250576	2810439F02Rik	Mus musculus RIKEN cDNA 2810439F02 gene (2810439F02Rik), mRNA.	3.76357	3.31452	5.05996	5.00864	1.69107	2.71824	2.982	-1.0093	1.15813	3.27123	1.82124	-1.03665	1.9251	1.48317	0	0	1	1	0	0	0	0	0	0	0	0	0	0	2	0.142857	0	0.000194	0.080401	0.913421	0.994016	1.4109	0	0.000195	0.080885	0.91892	0.550974	266.5	272.5	272.8	271.9	2.82	27
ILMN_2776721	Gyk		3.7622	6.21003	27.4827	21.1112	1.8128	3.63587	12.6195	2.55385	2.9745	8.43176	7.58829	2.34714	6.72593	1.20646	0	0	1	1	0	0	1	0	0	0	0	0	0	0	3	0.214286	0	0	0.018473	1.94591	1.96438	3.79989	0	0	0.009404	0.990596	0.619506	321.9	325.9	326.1	325.5	4.77	27
ILMN_1213191	Brrn1		3.76174	4.24167	3.40216	4.3514	1.74724	3.44607	-1.15491	2.05872	1.31563	2.11775	4.1916	1.24273	1.50943	3.02087	0	0	0	1	0	0	0	0	0	0	0	0	0	0	1	0.0714286	0	0	0.135959	1.11332	1.24928	1.60413	0	0	0.10883	0.89117	0.530769	284.8	288.8	289	288.4	2.3	27
ILMN_2795078	Unc93b1	Mus musculus unc-93 homolog B1 (C. elegans) (Unc93b1), mRNA.	3.76109	6.07493	13.78	5.78822	3.1386	3.27876	4.74761	8.72693	3.13318	13.6371	11.8976	3.24859	3.78738	4.42213	0	0	1	1	0	0	0	1	0	1	1	0	0	0	5	0.357143	1.25326	0	0.153132	1.53692	2.94331	3.19913	0.425799	0	0.052027	0.522174	0.672041	310.4	316.4	316.7	315.8	4.74	27
ILMN_2913166	Serping1	Mus musculus serine (or cysteine) peptidase inhibitor, clade G, member 1 (Serping1), mRNA.	3.75503	6.32354	5.8174	4.41263	2.34583	2.49545	4.76937	3.84325	2.4454	6.65052	3.82875	1.84939	3.13211	3.56201	1	1	1	1	0	0	1	1	0	1	1	0	0	0	8	0.571429	0.372171	0	0	0.729435	1.10161	1.64403	0.337844	0	0	0.662156	0.66947	242.5	246.5	246.6	246.1	5.78	27
ILMN_2651077	Scotin	Mus musculus scotin gene (Scotin), transcript variant 2, mRNA.	3.74639	6.73526	7.15202	3.90705	2.96789	1.58334	3.79263	5.53785	3.07124	8.32913	5.60611	2.58979	3.32288	3.50922	0	1	1	0	0	0	0	1	0	1	1	0	0	0	5	0.357143	0	0	0	1.14399	1.14399	2.04761	0	0	0	1	0.58098	278.1	280.1	280.2	279.9	4.16	27
ILMN_2445100	Ssh1		3.74431	3.32587	1.77864	5.63908	1.62649	1.40306	1.60554	1.75002	1.41045	4.80488	5.63709	-1.18033	1.55959	2.13077	0	0	0	1	0	0	0	0	0	0	0	0	0	0	1	0.0714286	0.665836	0	0	1.389	2.05484	1.83189	0.324034	0	0	0.675966	0.435034	294.6	298.6	298.8	298.2	1.97	27
ILMN_2899863	Tnf	Mus musculus tumor necrosis factor (Tnf), mRNA.	3.74301	5.98175	13.0159	6.90317	3.44776	-1.21493	8.20259	2.59674	2.35911	7.31386	5.85807	-2.02554	4.63446	1.54882	0	0	1	1	0	0	1	0	0	0	0	0	0	0	3	0.214286	0	0.028582	0	1.43194	1.46052	2.6908	0	0.01957	0	0.98043	0.606544	297.7	301.7	301.8	301.3	4.47	27
ILMN_2836586	Mfsd10	Mus musculus major facilitator superfamily domain containing 10 (Mfsd10), mRNA.	3.74236	16.1695	15.7014	6.14622	4.71331	5.64755	5.52158	15.7688	6.81548	15.3248	11.595	-1.10889	4.3872	5.60588	0	1	1	0	0	0	0	1	0	1	1	0	0	0	5	0.357143	0	0	0	1.88942	1.88942	3.87806	0	0	0	1	0.634595	318.8	320.8	320.8	320.6	5.21	27
ILMN_2439505	2900006A08Rik		3.73925	14.2564	9.85411	5.66345	5.69139	1.9945	2.57198	2.49312	1.14775	21.6441	3.58892	9.2393	2.53415	3.95735	0	1	1	0	0	0	0	0	0	1	0	0	0	0	3	0.214286	0	0	0	1.86202	1.86202	3.26278	0	0	0	1	0.571987	317.6	319.6	319.7	319.4	4.01	27
ILMN_2437513	LOC100047963	PREDICTED: Mus musculus similar to ADIR1 (LOC100047963), mRNA.	3.73906	5.83204	3.63858	13.3045	6.90145	2.70556	3.14788	6.94235	2.65501	6.93646	4.11987	1.17556	1.81718	3.75251	0	0	0	1	1	0	0	0	0	0	0	0	0	0	2	0.142857	0	0	0.140278	1.7481	1.88838	3.07409	0	0	0.074285	0.925715	0.603081	318.5	322.5	322.7	322.1	3.66	27
ILMN_2866901	Efemp2	Mus musculus epidermal growth factor-containing fibulin-like extracellular matrix protein 2 (Efemp2), mRNA.	3.73873	7.53757	7.65618	5.15253	3.40383	4.40999	6.81144	4.60013	3.54419	15.2457	7.93965	2.87551	6.19742	5.75278	0	1	1	1	0	0	1	0	0	1	1	0	0	0	6	0.428571	0.447014	0	0	1.12122	1.56824	2.5136	0.285042	0	0	0.714958	0.667443	277.2	281.2	281.3	280.8	5.9	27
ILMN_2568269	A130099L09Rik		3.73498	1.34574	1.58909	1.0539	1.05425	-1.19113	1.04141	-1.39603	1.011	2.54541	1.62775	1.00245	2.15542	2.138	1	0	0	0	0	0	0	0	0	0	0	0	0	0	1	0.0714286	0	0.045319	0.09307	0.537112	0.675501	0.751877	0	0.067089	0.137779	0.795131	0.544614	232.3	238.3	238.6	237.6	1.65	27
ILMN_2672380	Arhgap22	Mus musculus Rho GTPase activating protein 22 (Arhgap22), mRNA.	3.73233	11.937	21.58	5.03056	8.29775	6.92553	7.06848	8.09188	6.08472	22.6013	11.9139	1.79886	7.0693	9.57131	0	0	1	0	1	0	0	0	0	1	1	0	0	0	4	0.285714	0	0	0	2.14497	2.14497	4.25084	0	0	0	1	0.62155	329.1	331.1	331.1	330.9	4.93	27
ILMN_2719139	AB124611	Mus musculus cDNA sequence AB124611 (AB124611), mRNA.	3.73181	3.04329	6.95632	6.79079	1.4891	-1.02406	4.52745	-1.68407	-1.00423	1.63932	1.11977	3.43629	2.86467	1.32704	0	0	1	1	0	0	0	0	0	0	0	0	0	0	2	0.142857	0	0	0	1.37053	1.37053	1.89286	0	0	0	1	0.456958	292.8	294.8	294.8	294.6	2.52	27
ILMN_1214521	LOC623453	PREDICTED: Mus musculus similar to proteolipid protein 2 (LOC623453), misc RNA.	3.72916	4.60893	3.96007	3.22867	3.91578	1.52317	5.23881	1.25034	1.7852	6.71072	2.85442	1.58434	1.82256	1.79998	0	0	0	0	1	0	1	0	0	1	0	0	0	0	3	0.214286	0.021617	0.037286	0	0.917847	0.976751	1.49071	0.022131	0.038174	0	0.939695	0.54877	262.8	268.8	269.1	268.1	3.35	27
ILMN_2724558	Anxa8	Mus musculus annexin A8 (Anxa8), mRNA.	3.7247	2.99046	29.1364	11.4712	7.48841	4.24238	7.48592	4.34822	2.00681	14.4717	6.37257	3.8579	7.36507	2.5479	0	0	1	1	0	0	0	0	0	0	0	0	0	0	2	0.142857	0	0	0	2.57889	2.57889	4.10653	0	0	0	1	0.529002	344	346	346	345.8	3.37	27
ILMN_1227164	Tubb5	Mus musculus tubulin, beta 5 (Tubb5), mRNA.	3.72451	5.13121	4.91418	5.15667	2.76435	2.2084	4.60334	3.51421	2.87943	6.36532	3.9338	1.647	3.33973	3.60334	1	1	1	1	0	0	1	0	0	1	1	0	0	0	7	0.5	0.333123	0	0	0.667752	1.00088	1.52396	0.332832	0	0	0.667168	0.673555	235.3	239.3	239.5	238.9	6.04	27
ILMN_2718550	BC027231	Mus musculus cDNA sequence BC027231 (BC027231), mRNA.	3.72309	-1.13663	4.27574	1.92861	1.40672	2.22785	2.83848	1.9583	1.68748	2.63001	2.59471	-1.92721	2.43434	2.09255	0	0	1	0	0	0	0	0	0	0	0	0	0	0	1	0.0714286	0	0	0.113841	0.818515	0.932356	1.42852	0	0	0.1221	0.8779	0.617237	261	265	265.1	264.6	3.19	27
ILMN_1219777	Lrrk1	Mus musculus leucine-rich repeat kinase 1 (Lrrk1), mRNA.	3.72128	2.237	1.78785	1.97361	1.56789	1.07244	2.21272	2.86513	3.35167	9.21404	3.65507	1.29775	2.82719	3.09747	0	0	0	0	0	0	0	0	0	1	0	0	0	0	1	0.0714286	0	0	0.121448	1.14261	1.26406	1.69772	0	0	0.096078	0.903922	0.539631	285.9	289.9	290	289.5	2.49	27
ILMN_1221598	9330133O14Rik		3.71954	3.61752	5.52146	3.15063	2.703	1.2526	3.50851	1.92619	2.93927	8.43585	2.95806	2.5585	1.96392	1.32666	0	0	1	0	0	0	0	0	0	1	0	0	0	0	2	0.142857	0	0	0	1.17906	1.17906	1.80141	0	0	0	1	0.509109	280.6	282.6	282.6	282.4	3.11	27
ILMN_2896601	Icam1	Mus musculus intercellular adhesion molecule 1 (Icam1), mRNA.	3.71748	6.6194	5.27748	2.35054	2.26326	-1.08519	3.56173	10.489	1.40574	5.0642	3.97258	1.22354	2.73435	2.88534	0	1	1	0	0	0	0	1	0	0	0	0	0	0	3	0.214286	0.069351	0	0	0.873802	0.943153	1.69694	0.073531	0	0	0.926469	0.615759	253.6	257.6	257.7	257.2	4.59	27
ILMN_3129464	Clm3	Mus musculus CMRF-35-like molecule 3 (Clm3), mRNA.	3.71626	7.67376	10.8074	10.1814	3.12007	1.49791	4.97012	1.47481	1.27344	15.5	7.1121	5.02579	2.35039	3.60521	0	0	1	1	0	0	0	0	0	1	0	0	0	0	3	0.214286	0	0	0	2.23616	2.23616	3.35996	0	0	0	1	0.50085	332.4	334.4	334.5	334.2	3.01	27
ILMN_1215085	Fkbp10	Mus musculus FK506 binding protein 10 (Fkbp10), mRNA.	3.71613	7.36099	7.28132	15.0774	2.7152	4.29423	8.05888	17.8049	6.50841	27.6588	10.3569	7.30958	16.3456	11.3774	0	0	0	1	0	0	1	1	0	1	1	0	1	1	7	0.5	1.54291	0	0	1.93616	3.47906	4.64103	0.443483	0	0	0.556517	0.689625	321.8	325.8	326	325.4	6.13	27
ILMN_2932787	BC006779	Mus musculus cDNA sequence BC006779 (BC006779), mRNA. XM_001001098 XM_001003843 XM_001003848 XM_001003853 XM_001003857 XM_994341 XM_994355 XM_994381 XM_994398	3.71542	5.03596	13.2503	4.9534	3.75351	1.41174	2.37789	2.85319	3.71008	8.36056	6.55695	4.01616	1.53748	8.60082	0	0	1	0	0	0	0	0	0	0	0	0	0	0	1	0.0714286	0	0	0	1.85164	1.85164	2.74751	0	0	0	1	0.494549	317.2	319.2	319.2	318.9	2.94	27
ILMN_1243876	Casp8	Mus musculus caspase 8 (Casp8), transcript variant 1, mRNA.	3.7133	3.77899	11.5594	6.11885	4.29209	1.92997	7.77251	7.78286	1.58445	20.0209	4.3796	2.34714	4.50523	2.42654	0	0	1	1	0	0	1	1	0	1	0	0	0	0	5	0.357143	0.397331	0	0	1.49773	1.89506	2.77666	0.209667	0	0	0.790333	0.597362	300.5	304.5	304.6	304	4.19	27
ILMN_2955919	Mcam	Mus musculus melanoma cell adhesion molecule (Mcam), mRNA.	3.71149	3.90223	3.31544	2.32908	2.5865	1.58488	2.27178	2.74028	2.3617	3.31176	2.44503	1.41069	2.09953	2.64068	1	1	1	0	0	0	0	0	0	0	0	0	0	0	3	0.214286	0	0	0	0.546772	0.546772	0.924716	0	0	0	1	0.556535	218.4	220.4	220.4	220.1	3.76	27
[truncated: 12,050 more rows]
[truncated: 125 more columns]
