# Supplementary material for: Gene expression in mouse muscle over time after nickel pellet implantation
Source: Royal Society of Chemistry journal article supplement (doi:10.1039/c9mt00289h), 2020-02-12
Supplement: c9mt00289h3.xlsx [file c9mt00289h3.xlsx]

## Sheet: Explanation of Datasheet
Each Worksheet shows the GO processes Biological Function, Cellular Component, and Molecular Funtion in Red and their associated GO terms
Green highlighst for GO terms indicates that they were significant under B&H false discovery correction
Analysis was carried out using EnrichR; https://amp.pharm.mssm.edu/Enrichr/

## Sheet: Week 2 Up
BP GO Term	Overlap	P-value	Adjusted P-value	Odds Ratio	Combined Score	Genes		CC GO Term	Overlap	P-value	Adjusted P-value	Odds Ratio	Combined Score	Genes		MF GO Term	Overlap	P-value	Adjusted P-value	Odds Ratio	Combined Score	Genes
neutrophil degranulation (GO:0043312)	50/480	2.83177e-13	1.44505e-09	3.22997	93.3227	SNAP23;CXCL1;TCIRG1;CTSS;SIRPB1;LGALS3;HK3;GLIPR1;GM2A;LAMP2;CLEC5A;COTL1;SIRPA;CTSC;CD53;CAP1;CD93;ARG1;CD300A;PGAM1;SLC11A1;PLAUR;MIF;TNFRSF1B;MMP9;CLEC4D;TYROBP;PECAM1;CHI3L1;ADAM8;S100A9;S100A8;CD44;CSTB;MVP;PTAFR;FPR2;IQGAP1;GPR84;C3;SDCBP;CAND1;CD14;S100A11;PFKL;FABP5;SELL;DEGS1;HSPA1B;HSPA1A		ficolin-1-rich granule (GO:0101002)	22/185	1.4371e-07	6.40947e-05	3.68741	58.0968	CSTB;CD93;CD300A;SLC11A1;PGAM1;MVP;MIF;FPR2;TCIRG1;MMP9;CTSS;LGALS3;HK3;PFKL;CLEC4D;CAND1;LAMP2;COTL1;SIRPA;ADAM8;HSPA1B;HSPA1A		cytokine activity (GO:0005125)	15/156	0.000163246	0.187896	2.98151	25.9996	IL11;IL33;IL1RN;EDN1;OSM;CXCL1;MIF;INHBA;CXCL2;CXCL16;CCL7;IL1B;CCL4;CCL3;CCL2
neutrophil activation involved in immune response (GO:0002283)	50/484	3.88856e-13	9.92167e-10	3.20328	91.5355	SNAP23;CXCL1;TCIRG1;CTSS;SIRPB1;LGALS3;HK3;GLIPR1;GM2A;LAMP2;CLEC5A;COTL1;SIRPA;CTSC;CD53;CAP1;CD93;ARG1;CD300A;PGAM1;SLC11A1;PLAUR;MIF;TNFRSF1B;MMP9;CLEC4D;TYROBP;PECAM1;CHI3L1;ADAM8;S100A9;S100A8;CD44;CSTB;MVP;PTAFR;FPR2;IQGAP1;GPR84;C3;SDCBP;CAND1;CD14;S100A11;PFKL;FABP5;SELL;DEGS1;HSPA1B;HSPA1A		tertiary granule (GO:0070820)	19/165	1.65446e-06	0.000368944	3.57059	47.5318	CD53;CSTB;CD93;CD300A;SLC11A1;SNAP23;PTAFR;CXCL1;GPR84;FPR2;TCIRG1;MMP9;CTSS;LGALS3;CLEC4D;LAMP2;CLEC5A;SIRPA;ADAM8		actin binding (GO:0003779)	20/255	0.000243352	0.140049	2.43198	20.2365	CAP1;TPM4;ACTN1;ARPC1B;TPM1;CXCR4;ARPC4;MEFV;CORO2A;CORO1A;MYL4;MICALL2;COTL1;MYH8;FLNA;FLNB;FXYD5;LCP1;SYNPO;CCR5
neutrophil mediated immunity (GO:0002446)	50/488	5.31942e-13	9.04834e-10	3.17702	89.7898	SNAP23;CXCL1;TCIRG1;CTSS;SIRPB1;LGALS3;HK3;GLIPR1;GM2A;LAMP2;CLEC5A;COTL1;SIRPA;CTSC;CD53;CAP1;CD93;ARG1;CD300A;PGAM1;SLC11A1;PLAUR;MIF;TNFRSF1B;MMP9;CLEC4D;TYROBP;PECAM1;CHI3L1;ADAM8;S100A9;S100A8;CD44;CSTB;MVP;PTAFR;FPR2;IQGAP1;GPR84;C3;SDCBP;CAND1;CD14;S100A11;PFKL;FABP5;SELL;DEGS1;HSPA1B;HSPA1A		tertiary granule membrane (GO:0070821)	12/74	4.02864e-06	0.000598924	5.02828	62.4618	CD53;CLEC4D;CD93;CD300A;SLC11A1;SNAP23;CLEC5A;PTAFR;SIRPA;ADAM8;FPR2;GPR84		chemokine activity (GO:0008009)	7/47	0.000719289	0.275967	4.61818	33.4229	CCL7;CCL4;CCL3;CCL2;CXCL1;CXCL2;CXCL16
cellular response to cytokine stimulus (GO:0071345)	43/457	3.63285e-10	4.63461e-07	2.91758	63.416	CDKN1A;IL1RN;CSF3R;CD80;PTAFR;TCF7;CXCR4;CXCL1;IL2RG;CSF2RA;CXCL2;YBX3;HSP90B1;ZFP36L1;SOCS3;ZFP36;CCL7;IRAK2;INPP5D;CCL4;CCL3;CCL2;CCR5;JUNB;IL13RA1;ADAMTS7;IFNAR2;IL11;XBP1;IL10RB;STAT3;MMP3;BGN;OSM;TNFRSF1B;OSMR;MMP9;IL1B;SAA1;BIRC5;SDC1;CHI3L1;VIM		secretory granule lumen (GO:0034774)	27/318	5.08312e-06	0.000566768	2.63273	32.0919	CSTB;MVP;PDGFB;CXCL1;THBS1;KNG1;C3;SDCBP;HK3;CAND1;GM2A;COTL1;S100A11;CTSC;CAP1;SRGN;ARG1;ACTN1;PGAM1;MIF;PFKL;FABP5;SERPING1;CHI3L1;MAGED2;S100A9;S100A8		actin filament binding (GO:0051015)	12/128	0.000899305	0.258775	2.90698	20.3892	MYL4;TPM4;ACTN1;ARPC1B;TPM1;MYH8;MICALL2;FLNA;ARPC4;LCP1;CORO2A;CORO1A
cytokine-mediated signaling pathway (GO:0019221)	52/634	7.28283e-10	7.43285e-07	2.54322	53.5102	CDKN1A;CIITA;IFITM1;IL1RN;CSF3R;CD80;CXCL1;CXCL2;LMNB1;CCR5;JUNB;IL13RA1;IFNAR2;IL11;GPR35;MMP3;BGN;MIF;TNFRSF1B;OSMR;MMP9;IL1B;BIRC5;LCP1;CARD14;CD44;PTAFR;PDGFB;TNFRSF11A;IL2RG;CSF2RA;HSP90B1;SOCS3;CCL7;IRAK2;INPP5D;CCL4;CCL3;CCL2;IL33;TNFSF14;IL10RB;STAT3;OSM;TNIP2;SAA1;SDC1;P4HB;VIM;LTBR;IL7R;MYD88		focal adhesion (GO:0005925)	29/357	5.45427e-06	0.000486521	2.51884	30.5261	TES;FBLIM1;ARPC1B;SNAP23;TNC;FHL2;IQGAP1;PVR;HSP90B1;PDLIM1;FLNA;FLNB;CLASP1;CAP1;TPM4;ACTN1;MCAM;PLAUR;RHOB;MTF2;FAT1;ITGA6;ITGA5;LCP1;VIM;P4HB;CD44;HSPA1B;HSPA1A		chemokine receptor binding (GO:0042379)	7/50	0.00105105	0.241951	4.34109	29.771	CCL7;CCL4;CCL3;CCL2;CXCL1;CXCL2;CXCL16
extracellular matrix organization (GO:0030198)	25/230	1.21333e-07	0.000103193	3.37041	53.6728	COL18A1;COL12A1;PDGFB;TNC;F11R;THBS1;CTSS;ADAMTS4;SPP1;ATP7A;CSGALNACT1;MMP3;BGN;MMP9;MMP10;MMP12;MMP13;COL4A1;COL5A2;PECAM1;ADAM8;ITGA6;ITGA5;LCP1;CD44		ficolin-1-rich granule membrane (GO:0101003)	10/62	2.68725e-05	0.00199752	5.00125	52.6352	LGALS3;CLEC4D;CD93;CD300A;SLC11A1;LAMP2;SIRPA;ADAM8;TCIRG1;FPR2		collagen binding (GO:0005518)	7/53	0.00149252	0.286314	4.09536	26.6497	MMP12;MMP13;PDGFB;MMP9;THBS1;CTSS;CD44
inflammatory response (GO:0006954)	26/253	2.08417e-07	0.000151936	3.18657	49.0213	CEBPB;CXCR4;CXCL1;FPR2;TNFRSF11A;F11R;MEFV;CXCL2;THBS1;CCL7;CCL4;CCL3;CCL2;IL10RB;SLC11A1;STAT3;F2R;TNFRSF1B;NFKB2;IL1B;CHI3L1;ADAM8;LTBR;FCGR2B;S100A9;S100A8		cytoplasmic vesicle lumen (GO:0060205)	14/130	7.98307e-05	0.00508636	3.3393	31.5083	CSTB;PGAM1;MVP;MIF;HSP90B1;C3;HK3;PFKL;CAND1;COTL1;SAA1;S100A9;S100A8;S100A11		C-C chemokine binding (GO:0019957)	3/8	0.00165599	0.272292	11.6279	74.4576	ZFP36;CXCR4;CCR5
response to cytokine (GO:0034097)	18/139	5.4982e-07	0.000350717	4.01539	57.8766	IFNAR2;IFITM1;CIITA;GCH1;SLC11A1;STAT3;CXCR4;TNFRSF11A;MEFV;OSMR;CXCL16;NFKB2;CASP8;IRAK2;ALDH1A2;CHI3L1;JUNB;MYD88		specific granule membrane (GO:0035579)	11/92	0.000181204	0.0101021	3.70745	31.943	CD53;CLEC4D;CD93;SNAP23;CLEC5A;PLAUR;ADAM8;DEGS1;FPR2;GPR84;TNFRSF1B		chemokine binding (GO:0019956)	4/18	0.00228602	0.3289	6.89061	41.9014	CX3CR1;ZFP36;CXCR4;CCR5
regulation of cell migration (GO:0030334)	28/317	1.57995e-06	0.000895833	2.73886	36.5859	IFITM1;ROBO4;SEMA7A;PDGFB;STC1;SEMA3F;THBS1;CXCL16;SDCBP;CCL7;LMNA;GCNT2;CCL3;FLNA;SRGAP3;XBP1;EDN1;F10;TPM1;F2R;RHOC;SULF1;MMP9;ADRA2A;RHOB;IL1B;SPATA13;ITGA6		contractile actin filament bundle (GO:0097517)	7/41	0.000303873	0.0150586	5.29401	42.8756	TPM4;FBLIM1;ACTN1;TPM1;MICALL2;LCP1;SYNPO		cytokine receptor activity (GO:0004896)	8/74	0.00259607	0.332009	3.35219	19.9581	IFNAR2;CX3CR1;IL10RB;CCR5;OSMR;IL2RG;IL7R;CD44
negative regulation of lymphocyte proliferation (GO:0050672)	8/30	3.49716e-06	0.0017846	8.26873	103.885	CEBPB;SDC4;ARG1;CD300A;CD80;LST1;SOX11;FCGR2B		stress fiber (GO:0001725)	7/41	0.000303873	0.0135527	5.29401	42.8756	TPM4;FBLIM1;ACTN1;TPM1;MICALL2;LCP1;SYNPO		protein heterodimerization activity (GO:0046982)	18/266	0.00260032	0.299297	2.09827	12.4891	TPD52;UGT1A10;BNIP3L;GTF2A1;XBP1;CEBPB;TPM4;TPM1;PDGFB;SRI;SDCBP2;ADRA2A;EXT1;SDCBP;IRAK2;TCF3;P4HB;YWHAH
positive regulation of calcium ion import (GO:0090280)	5/10	7.56606e-06	0.00350996	15.5039	182.819	LGALS3;CCL3;PDGFB;STC1;CCL2		ficolin-1-rich granule lumen (GO:1904813)	12/124	0.000677985	0.0274892	3.00075	21.8946	HK3;CSTB;PFKL;CAND1;PGAM1;MVP;COTL1;MIF;MMP9;CTSS;HSPA1B;HSPA1A		chemokine receptor activity (GO:0004950)	4/21	0.00414134	0.433335	5.90624	32.406	CX3CR1;GPR35;CXCR4;CCR5
response to lipopolysaccharide (GO:0032496)	17/156	1.21351e-05	0.00516044	3.37905	38.2489	XBP1;GCH1;CD80;SLC11A1;F2R;CXCL1;TNFRSF11A;TNFRSF1B;CXCL2;SELP;ZFP36;TNIP2;CCL2;CD14;LTBR;CCR5;JUNB		platelet alpha granule (GO:0031091)	10/91	0.000696234	0.0258767	3.40745	24.7715	SRGN;SELP;ACTN1;PECAM1;PDGFB;SERPING1;MAGED2;LHFPL2;THBS1;KNG1		mRNA 3'-UTR AU-rich region binding (GO:0035925)	3/11	0.00453852	0.43532	8.45666	45.625	ZFP36;CPEB2;ZFP36L1
platelet degranulation (GO:0002576)	15/125	1.23096e-05	0.00483199	3.72093	42.0656	SRGN;ACTN1;PLEK;PDGFB;ENDOD1;LHFPL2;THBS1;KNG1;SELP;LAMP2;PECAM1;SERPING1;FLNA;TAGLN2;MAGED2		specific granule (GO:0042581)	14/161	0.000739845	0.0253824	2.69633	19.438	CD53;CD93;ARG1;SNAP23;PLAUR;CXCL1;GPR84;FPR2;TNFRSF1B;CLEC4D;CLEC5A;CHI3L1;ADAM8;DEGS1		metalloendopeptidase activity (GO:0004222)	7/66	0.00526689	0.466323	3.2887	17.2536	ADAMTS4;MMP12;MMP13;MMP3;MMP9;MMP10;ADAMTS7
response to tumor necrosis factor (GO:0034612)	13/98	1.56951e-05	0.00572085	4.11327	45.5017	GCH1;TNFRSF11A;YBX3;CXCL16;ZFP36L1;ZFP36;CASP8;CCL7;CCL4;CCL3;CHI3L1;CCL2;ADAMTS7		actomyosin (GO:0042641)	7/49	0.000929344	0.0296062	4.42968	30.9237	TPM4;FBLIM1;ACTN1;TPM1;MICALL2;LCP1;SYNPO		cadherin binding (GO:0045296)	19/314	0.00672271	0.552703	1.87627	9.38557	PTPN1;TES;CAPG;ENO1;IQGAP1;F11R;NDRG1;FAM129B;PDLIM1;SDCBP;EHD4;PRDX1;FLNA;TAGLN2;FLNB;ITGA6;FXYD5;S100A11;HSPA1A
positive regulation of intracellular signal transduction (GO:1902533)	34/480	1.67904e-05	0.00571209	2.19638	24.1486	CD80;PDGFB;BCL10;TNFRSF11A;LITAF;THBS1;BCL2L11;CASP8;CCL4;MIER1;GCNT2;CCL3;FLNA;CD14;BID;EPHB4;IL11;F10;F2R;OSM;SOX11;MIF;TNFRSF1B;RHOC;ADRA2A;SELP;TNIP2;CHI3L1;ADAM8;LTBR;IL7R;S100A9;S100A8;MYD88		endoplasmic reticulum lumen (GO:0005788)	19/271	0.00133619	0.0397294	2.17398	14.3872	COL18A1;F10;COL12A1;COL23A1;PDGFB;TNC;PLAUR;CP;THBS1;SUMF2;KNG1;HSP90B1;C3;COL4A1;COL5A2;SPP1;P4HB;CTSC;ADAMTS7		integrin binding (GO:0005178)	8/95	0.0116649	0.895088	2.61118	11.6228	ESM1;SEMA7A;ACTN1;IL1B;LCP1;P4HB;THBS1;CTGF
response to molecule of bacterial origin (GO:0002237)	13/99	1.75432e-05	0.0055952	4.07173	44.5888	GCH1;SLC11A1;F2R;CXCL1;BCL10;TNFRSF11A;TNFRSF1B;CXCL2;SELP;CD14;LTBR;FCGR2B;JUNB		vacuolar lumen (GO:0005775)	13/162	0.00232583	0.0648325	2.48828	15.0881	CAP1;SDC4;ARG1;BGN;CTSS;SGSH;C3;SDCBP;GM2A;FABP5;LAMP2;SDC1;CTSC		C3HC4-type RING finger domain binding (GO:0055131)	2/6	0.0142892	1	10.3359	43.9096	HSPA1B;HSPA1A
regulated exocytosis (GO:0045055)	16/149	2.61394e-05	0.00784644	3.32969	35.1351	SRGN;ACTN1;PLEK;PDGFB;ENDOD1;LHFPL2;THBS1;KNG1;SELP;LAMP2;PECAM1;SERPING1;FLNA;TAGLN2;MAGED2;STEAP2		platelet alpha granule lumen (GO:0031093)	7/68	0.00620558	0.162805	3.19197	16.2226	SRGN;ACTN1;PDGFB;SERPING1;MAGED2;THBS1;KNG1		proton-transporting ATPase activity, rotational mechanism (GO:0046961)	3/17	0.0162011	1	5.47196	22.5591	ATP6V1A;ATP6V1H;TCIRG1
leukocyte aggregation (GO:0070486)	4/7	3.47085e-05	0.00983985	17.7187	181.945	IL1B;S100A9;CD44;S100A8		secondary lysosome (GO:0005767)	3/13	0.00749767	0.185776	7.15564	35.0137	NCF4;LAMP2;ADAM8		metallopeptidase activity (GO:0008237)	8/103	0.0182903	1	2.40837	9.63681	ADAMTS4;MMP12;MMP13;MMP3;ADAM8;MMP9;MMP10;ADAMTS7
regulation of natural killer cell chemotaxis (GO:2000501)	4/7	3.47085e-05	0.00932196	17.7187	181.945	CCL7;CCL4;CCL3;CCL2		actin filament (GO:0005884)	6/56	0.00909128	0.213406	3.32226	15.6161	TPM4;ACTN1;TPM1;LCP1;IQGAP1;CORO1A		myosin heavy chain binding (GO:0032036)	2/7	0.0195807	1	8.85936	34.8457	MYL4;CORO1A
extracellular matrix disassembly (GO:0022617)	11/79	4.44511e-05	0.0113417	4.31754	43.2665	ADAMTS4;MMP12;MMP13;MMP3;SPP1;ADAM8;LCP1;MMP9;CTSS;MMP10;CD44		trans-Golgi network transport vesicle (GO:0030140)	3/15	0.0113703	0.253558	6.20155	27.7628	TMED9;ATP7A;STEAP2		G-protein coupled nucleotide receptor activity (GO:0001608)	2/8	0.0255556	1	7.75194	28.4256	GPR171;PTAFR
positive regulation of hydrolase activity (GO:0051345)	17/173	4.65177e-05	0.0113038	3.047	30.3959	USP6NL;RGS16;TPM1;F2R;ATP1B3;F11R;RHOC;MYL4;ABR;SNX18;CCL7;RGS1;CCL4;CCL3;CCL2;ITGA6;RAPGEF6		platelet dense granule membrane (GO:0031088)	2/6	0.0142892	0.303475	10.3359	43.9096	SELP;LAMP2		G-protein coupled purinergic nucleotide receptor activity (GO:0045028)	2/8	0.0255556	1	7.75194	28.4256	GPR171;PTAFR
regulation of calcium ion import (GO:0090279)	6/22	5.27205e-05	0.0122288	8.45666	83.3024	LGALS3;SLN;PDGFB;CCL3;STC1;CCL2		actin cytoskeleton (GO:0015629)	17/295	0.0155874	0.315999	1.78689	7.43576	CAP1;TPM4;ACTN1;ARPC1B;TPM1;SLC2A1;IQGAP1;CORO2A;CORO1A;CTTNBP2NL;CDC42EP4;MICALL2;FLNA;TAX1BP3;FLNB;LCP1;SYNPO		AU-rich element binding (GO:0017091)	3/21	0.0288176	1	4.42968	15.711	ZFP36;CPEB2;ZFP36L1
response to interferon-gamma (GO:0034341)	10/69	6.94107e-05	0.0154001	4.49388	43.031	IFITM1;CIITA;CCL7;GCH1;SLC11A1;CCL4;CCL3;CCL2;MEFV;CXCL16		platelet alpha granule membrane (GO:0031092)	3/17	0.0162011	0.314161	5.47196	22.5591	SELP;PECAM1;LHFPL2		hydrogen-exporting ATPase activity (GO:0036442)	3/21	0.0288176	1	4.42968	15.711	ATP6V1A;ATP6V1H;TCIRG1
regulation of erythrocyte differentiation (GO:0045646)	7/33	7.22046e-05	0.0153525	6.5774	62.7221	ZFP36;TAL1;STAT3;INHBA;HSPA1B;ZFP36L1;HSPA1A		phagocytic vesicle (GO:0045335)	7/84	0.0187224	0.347924	2.58398	10.2792	SLC11A1;SNAP23;NCF4;ADAM8;TCIRG1;ATP7A;CORO1A		growth factor receptor binding (GO:0070851)	7/93	0.030681	1	2.33392	8.13163	IL11;SDCBP;ESM1;IL1B;PDGFB;ITGA5;PGF
positive regulation of MAPK cascade (GO:0043410)	23/290	7.24231e-05	0.014783	2.45924	23.4439	IL11;EDN1;SEMA7A;F2R;PDGFB;OSM;MIF;FPR2;TNFRSF11A;ARRB2;TNFRSF1B;ADRA2A;CTGF;CCL7;CCL4;GCNT2;CCL3;CHI3L1;CCL2;ADAM8;LTBR;EPHB4;CD44		lysosomal lumen (GO:0043202)	7/87	0.0222634	0.397178	2.49488	9.49254	GM2A;SDC4;LAMP2;BGN;SDC1;CTSS;SGSH		RAGE receptor binding (GO:0050786)	2/9	0.0321645	1	6.89061	23.6823	S100A9;S100A8
positive regulation of cell motility (GO:2000147)	17/180	7.65896e-05	0.0150322	2.92851	27.7536	SEMA7A;XBP1;EDN1;F10;F2R;PDGFB;SEMA3F;MMP9;THBS1;ADRA2A;CXCL16;SDCBP;CCL7;IL1B;GCNT2;CCL3;ITGA6		azurophil granule lumen (GO:0035578)	7/91	0.02767	0.474646	2.38521	8.55673	CAP1;C3;SDCBP;GM2A;FABP5;ARG1;CTSC		superoxide-generating NADPH oxidase activator activity (GO:0016176)	2/9	0.0321645	1	6.89061	23.6823	NCF4;PDGFB
lymphocyte chemotaxis (GO:0048247)	8/45	8.40716e-05	0.0158895	5.51249	51.7283	CCL7;CCL4;CCL3;SAA1;CCL2;ADAM8;CYP7B1;CXCL16		azurophil granule (GO:0042582)	10/155	0.0289007	0.477397	2.0005	7.08955	C3;CAP1;SDCBP;GLIPR1;GM2A;FABP5;ARG1;LAMP2;SNAP23;CTSC		Toll-like receptor binding (GO:0035325)	2/9	0.0321645	1	6.89061	23.6823	S100A9;S100A8
positive regulation of calcium ion transport (GO:0051928)	7/34	8.84149e-05	0.0161136	6.38395	59.5844	LGALS3;CCL4;F2R;PDGFB;CCL3;STC1;CCL2		ruffle membrane (GO:0032587)	5/54	0.0296619	0.472471	2.87109	10.1002	PSD4;PLEK;TPM1;SPATA13;ITGA5		D-glucose transmembrane transporter activity (GO:0055056)	2/9	0.0321645	1	6.89061	23.6823	SLC2A1;SLC2A6
neutrophil migration (GO:1990266)	9/59	0.000106136	0.0186762	4.73	43.2832	LGALS3;CCL7;CCL4;PECAM1;CCL3;SAA1;CCL2;S100A9;S100A8		phagocytic vesicle membrane (GO:0030670)	4/39	0.0361495	0.555955	3.18028	10.5588	SLC11A1;SNAP23;TCIRG1;ATP7A		ATPase activity, coupled to transmembrane movement of ions, phosphorylative mechanism (GO:0015662)	3/22	0.0325887	1	4.22833	14.4769	ATP2B2;ATP13A3;ATP7A
negative regulation of T cell activation (GO:0050868)	7/35	0.00010747	0.0182806	6.20155	56.6716	LGALS3;CEBPB;SDC4;ARG1;CD80;FCGR2B;HAVCR2		myosin filament (GO:0032982)	2/10	0.0393603	0.585157	6.20155	20.062	MYH8;ACTG2		CCR chemokine receptor binding (GO:0048020)	4/39	0.0361495	1	3.18028	10.5588	CCL7;CCL4;CCL3;CCL2
pattern recognition receptor signaling pathway (GO:0002221)	8/49	0.000157048	0.0258522	5.06249	44.3421	IRAK2;BCL10;CD14;S100A9;CTSS;S100A8;MYD88;HSP90B1		integral component of plasma membrane (GO:0005887)	59/1464	0.0447563	0.643913	1.24963	3.882	CSF3R;SLC2A1;TCIRG1;SLC7A11;PVR;SLC2A6;SIRPB1;EDNRA;GPR171;CLEC5A;EMB;CCR5;EPHB4;IFITM5;IL13RA1;IFNAR2;CD53;ABCC3;GPR35;SLC11A1;F2R;AVPR1A;TNFRSF1B;OSMR;ADRA2A;SLC7A7;TYROBP;SLCO4A1;ADAM8;STEAP2;CD44;CX3CR1;ATP6V1A;SDC4;PTAFR;SLC1A4;FPR2;GPR84;TNFRSF11A;IL2RG;PCDH19;CSF2RA;PROKR1;SDCBP;PCDHA2;IL10RB;ATP2B2;GPR137B;SELP;DLG3;SELL;FAT1;SDC1;DEGS1;FXYD5;ATP13A3;LTBR;FCGR2B;LRP12		death receptor binding (GO:0005123)	2/10	0.0393603	1	6.20155	20.062	BID;MYD88
macrophage chemotaxis (GO:0048246)	4/10	0.000192704	0.0307303	12.4031	106.101	LGALS3;CCL3;SAA1;CCL2		lysosome (GO:0005764)	20/423	0.0576824	0.803948	1.46609	4.18246	ATP6V1A;SRGN;PI4K2B;NAPSA;SDC4;SLC11A1;BGN;CXCR4;BCL10;TCIRG1;CP;LITAF;CTSS;SGSH;GM2A;LAMP2;SDC1;ATP6V1H;SLC15A3;CTSC		hydrolase activity, acting on carbon-nitrogen (but not peptide) bonds, in linear amidines (GO:0016813)	2/10	0.0393603	1	6.20155	20.062	ARG2;ARG1
macrophage migration (GO:1905517)	4/10	0.000192704	0.029799	12.4031	106.101	LGALS3;CCL3;SAA1;CCL2		sarcoplasmic reticulum (GO:0016529)	3/30	0.0712327	0.962721	3.10078	8.19164	SLN;SRI;THBS1		vascular endothelial growth factor receptor binding (GO:0005172)	2/10	0.0393603	1	6.20155	20.062	ITGA5;PGF
positive regulation of phagocytosis (GO:0050766)	7/40	0.000259119	0.0388907	5.42636	44.8121	C3;SLC11A1;IL1B;SIRPA;CCL2;FCGR2B;SIRPB1		integral component of peroxisomal membrane (GO:0005779)	2/14	0.0731544	0.959614	4.42968	11.5844	FAR1;PEX12		death receptor activity (GO:0005035)	3/25	0.0453531	1	3.72093	11.5099	TNFRSF11A;LTBR;TNFRSF1B
positive regulation of NF-kappaB transcription factor activity (GO:0051092)	13/129	0.000276652	0.0403359	3.12481	25.6008	BCL10;TNFRSF11A;TRAF1;NFKB2;IRAK2;IL1B;ADAM8;S100A9;CARD14;S100A8;MYD88;HSPA1B;HSPA1A		chromosome, centromeric region (GO:0000775)	4/50	0.0771082	0.982579	2.48062	6.3567	CENPT;INCENP;BIRC5;CDCA8		tumor necrosis factor-activated receptor activity (GO:0005031)	3/25	0.0453531	1	3.72093	11.5099	TNFRSF11A;LTBR;TNFRSF1B
regulation of cell proliferation (GO:0042127)	42/741	0.000304663	0.043186	1.75752	14.2295	COL18A1;CDKN1A;IFITM1;TES;BTG1;PDGFB;CXCL1;TCIRG1;TNFRSF11A;BRCA2;CXCL2;THBS1;FAM129B;ZFP36L1;SDCBP;ESM1;SERTAD1;LMNA;GCNT2;JUNB;S100A11;IL11;XBP1;EDN1;F2R;OSM;SOX11;INHBA;TNFRSF1B;OSMR;PGF;ADRA2A;ZAP70;DLG3;IL1B;ALDH1A2;BIRC5;LTBR;IL7R;HSPA1B;HSPA1A;CDKN3		lamellar body (GO:0042599)	2/15	0.0826597	1	4.13437	10.3071	NAPSA;ABCA3		ATPase coupled ion transmembrane transporter activity (GO:0042625)	3/25	0.0453531	1	3.72093	11.5099	ABCC3;ATP2B2;ATP13A3
neutrophil chemotaxis (GO:0030593)	8/54	0.000314555	0.0433831	4.59374	37.0455	LGALS3;CCL7;CCL4;CCL3;SAA1;CCL2;S100A9;S100A8		sarcoplasm (GO:0016528)	3/32	0.0830773	1	2.90698	7.23251	SLN;SRI;THBS1		phosphatidylinositol-4,5-bisphosphate binding (GO:0005546)	5/61	0.0465762	1	2.54162	7.79429	SDCBP;SNX18;ADAP2;SDCBP2;SNX20
positive regulation of cell migration (GO:0030335)	18/222	0.000328063	0.0440553	2.51414	20.1692	XBP1;EDN1;SEMA7A;F10;F2R;PDGFB;SEMA3F;MMP9;THBS1;ADRA2A;CXCL16;SDCBP;CCL7;IL1B;GCNT2;CCL3;ITGA6;CLASP1		cortical cytoskeleton (GO:0030863)	4/53	0.0910986	1	2.34021	5.6067	CAP1;SLC2A1;CORO1A;CLASP1		filamin binding (GO:0031005)	2/11	0.0470985	1	5.63777	17.2263	FBLIM1;MICALL2
monocyte chemotaxis (GO:0002548)	7/42	0.000354622	0.046401	5.16796	41.0566	LGALS3;CCL7;CCL4;PDGFB;CCL3;CCL2;TNFRSF11A		vacuolar proton-transporting V-type ATPase complex (GO:0016471)	2/16	0.0925162	1	3.87597	9.22624	ATP6V1H;TCIRG1		sodium:potassium-exchanging ATPase activity (GO:0005391)	2/11	0.0470985	1	5.63777	17.2263	ATP1B3;ATP1A1
wound healing, spreading of cells (GO:0044319)	5/20	0.000355939	0.0454089	7.75194	61.5562	MMP12;FLNA;ITGA5;RHOC;CD44		T cell receptor complex (GO:0042101)	2/16	0.0925162	1	3.87597	9.22624	ZAP70;BCL10		potassium-transporting ATPase activity (GO:0008556)	2/11	0.0470985	1	5.63777	17.2263	ATP1B3;ATP1A1
regulation of hormone secretion (GO:0046883)	4/12	0.000431393	0.0536926	10.3359	80.0878	IL11;EDN1;OSM;SOX11		Golgi subcompartment (GO:0098791)	21/480	0.0984051	1	1.35659	3.14547	CSGALNACT1;PI4K2B;PLK3;B4GALT3;TMED9;GCNT1;NCF4;PDGFB;SLC2A1;GALNT10;FUT4;TPST2;EXT1;UGCG;CHST11;B3GNT5;ST8SIA4;B4GALNT1;ATP7A;ST6GALNAC4;CHST2		platelet-derived growth factor binding (GO:0048407)	2/11	0.0470985	1	5.63777	17.2263	COL4A1;PDGFB
regulation of macrophage activation (GO:0043030)	5/21	0.000454854	0.0552647	7.3828	56.8146	IL33;TNIP2;MIF;FCGR2B;THBS1		tertiary granule lumen (GO:1904724)	4/56	0.106207	1	2.21484	4.96649	CSTB;CXCL1;MMP9;CTSS		thioesterase binding (GO:0031996)	2/11	0.0470985	1	5.63777	17.2263	TRAF1;ADRA2A
granulocyte chemotaxis (GO:0071621)	8/57	0.000458991	0.0544705	4.35197	33.4513	LGALS3;CCL7;CCL4;CCL3;SAA1;CCL2;S100A9;S100A8		clathrin-coated vesicle (GO:0030136)	6/101	0.10813	1	1.84204	4.09748	TMED9;SNX18;INPP5F;IL7R;ATP7A;STEAP2		immunoglobulin binding (GO:0019865)	2/11	0.0470985	1	5.63777	17.2263	LGALS3;FCGR2B
toll-like receptor signaling pathway (GO:0002224)	10/87	0.000486168	0.0563845	3.56411	27.1904	CASP8;IRAK2;TNIP2;BCL10;CD14;S100A9;CTSS;S100A8;MYD88;HSP90B1		endocytic vesicle lumen (GO:0071682)	2/18	0.113155	1	3.44531	7.50731	SAA1;HSP90B1		phosphatase binding (GO:0019902)	7/103	0.0490172	1	2.10732	6.35481	DLG3;MVP;STAT3;IQGAP1;KCNN4;CTSC;HSP90B1
positive regulation of GTPase activity (GO:0043547)	16/193	0.000541915	0.0614532	2.57059	19.3319	USP6NL;RGS16;F2R;TBC1D9;F11R;ABR;SNX18;CCL7;RGS1;ADPRH;CCL4;CCL3;CCL2;TAX1BP3;ITGA6;RAPGEF6		Golgi-associated vesicle (GO:0005798)	4/59	0.122365	1	2.10222	4.41624	TMED9;ATP7A;STEAP2;CTSC		ATPase activity, coupled to transmembrane movement of ions, rotational mechanism (GO:0044769)	3/26	0.0500805	1	3.57782	10.7124	ATP6V1A;ATP6V1H;TCIRG1
positive regulation of erythrocyte differentiation (GO:0045648)	5/22	0.000573129	0.0635799	7.04722	52.6032	TAL1;STAT3;INHBA;HSPA1B;HSPA1A		cytoplasmic microtubule (GO:0005881)	3/39	0.130316	1	2.38521	4.86057	SAA1;BCL10;CLASP1		kinase binding (GO:0019900)	20/419	0.0533581	1	1.48008	4.33773	IFNAR2;PTPN1;ERRFI1;CDKN1A;MIDN;BTG1;PGAM1;MVP;STAT3;WWC2;BCL10;IQGAP1;RHOC;ADRA2A;RHOB;ZFP36;PFKL;DLG3;TNIP2;FLNA
negative regulation of hormone secretion (GO:0046888)	4/13	0.000607282	0.0659353	9.54085	70.6644	IL11;IL1B;OSM;ADRA2A		endocytic vesicle (GO:0030139)	6/109	0.140589	1	1.70685	3.3487	INPP5F;SAA1;ARRB2;CORO1A;RAPGEF6;HSP90B1		enhancer binding (GO:0035326)	3/27	0.0550372	1	3.44531	9.99051	XBP1;SOX11;TCF3
positive regulation of inflammatory response (GO:0050729)	9/74	0.000608298	0.0646697	3.77121	27.9252	IL33;CCL4;CCL3;OSM;ADAM8;OSMR;S100A9;S100A8;MYD88		platelet dense granule (GO:0042827)	2/21	0.145991	1	2.95312	5.68243	SELP;LAMP2		tumor necrosis factor receptor superfamily binding (GO:0032813)	3/27	0.0550372	1	3.44531	9.99051	TRAF1;BID;MYD88
regulation of extracellular exosome assembly (GO:1903551)	3/6	0.000620792	0.0646511	15.5039	114.489	SDCBP;SDC4;SDC1		intrinsic component of external side of plasma membrane (GO:0031233)	2/22	0.157331	1	2.81889	5.21326	F10;CD14		potassium ion binding (GO:0030955)	2/12	0.0553367	1	5.16796	14.9577	ADPRH;ATP1A1
regulation of extrinsic apoptotic signaling pathway (GO:2001236)	8/60	0.000653063	0.0666517	4.13437	30.3208	LGALS3;CASP8;ITGA6;TRAF1;BCL10;LTBR;BID;THBS1		IPAF inflammasome complex (GO:0072557)	1/6	0.178574	1	5.16796	8.90311	CASP4		G-protein coupled peptide receptor activity (GO:0008528)	5/65	0.0583599	1	2.38521	6.77669	EDNRA;F2R;AVPR1A;FPR2;GPR84
cellular response to lipopolysaccharide (GO:0071222)	10/92	0.000759043	0.0759489	3.37041	24.2112	ZFP36;XBP1;TNIP2;CD80;IL1B;CCL3;CCL2;CD14;CCR5;TNFRSF1B		axolemma (GO:0030673)	1/6	0.178574	1	5.16796	8.90311	CNTNAP2		GTPase activator activity (GO:0005096)	13/250	0.0624549	1	1.6124	4.4717	USP6NL;ERRFI1;RGS16;ARHGAP29;TBC1D9;IQGAP1;ABR;ADAP2;RGS1;CDC42EP4;ADPRH;SRGAP3;SIPA1
response to interleukin-1 (GO:0070555)	9/77	0.000815213	0.0800007	3.62428	25.7761	CCL7;IRAK2;CCL4;CCL3;CHI3L1;CCL2;TNFRSF11A;MYD88;ADAMTS7		FACIT collagen trimer (GO:0005593)	1/6	0.178574	1	5.16796	8.90311	COL12A1		hexose transmembrane transporter activity (GO:0015149)	2/13	0.0640347	1	4.77042	13.1107	SLC2A1;SLC2A6
positive regulation of leukocyte chemotaxis (GO:0002690)	8/62	0.000815724	0.0785403	4.001	28.4529	CCL7;CCL4;CCL3;CXCL1;FPR2;CXCL2;THBS1;PGF		polymeric cytoskeletal fiber (GO:0099513)	10/222	0.181702	1	1.39675	2.38199	TUBB6;TPM4;ACTN1;TPM1;SLC1A4;IQGAP1;LCP1;VIM;NDRG1;CORO1A		platelet-derived growth factor receptor binding (GO:0005161)	2/13	0.0640347	1	4.77042	13.1107	PDGFB;ITGA5
regulation of intrinsic apoptotic signaling pathway (GO:2001242)	7/48	0.000819015	0.0773969	4.52196	32.1394	BCL2L11;PLAUR;P4HB;BID;MMP9;S100A9;S100A8		Golgi membrane (GO:0000139)	18/443	0.188129	1	1.25991	2.10484	USP6NL;CSGALNACT1;B4GALT3;TMED9;GCNT1;PDGFB;SLC2A1;GALNT10;FUT4;TPST2;EXT1;UGCG;CHST11;B3GNT5;ST8SIA4;B4GALNT1;ST6GALNAC4;CHST2		phosphatidylinositol phosphate 5-phosphatase activity (GO:0034595)	2/13	0.0640347	1	4.77042	13.1107	INPP5F;INPP5D
positive regulation of cytokine production (GO:0001819)	17/221	0.0008618	0.0799593	2.38521	16.8312	IL33;CEBPB;SLC11A1;MIF;SULF1;ADRA2A;RUNX1;NFKB2;C3;C1QTNF3;IL1B;SAA1;CD14;HSPA1B;MYD88;HAVCR2;HSPA1A		actin-based cell projection (GO:0098858)	4/71	0.195901	1	1.74692	2.84773	SPATA13;LCP1;ACTG2;CD44		GTPase inhibitor activity (GO:0005095)	2/13	0.0640347	1	4.77042	13.1107	IQGAP1;CPEB2
positive regulation of ERK1 and ERK2 cascade (GO:0070374)	16/202	0.000887041	0.0808317	2.45606	17.2603	SEMA7A;F2R;PDGFB;MIF;FPR2;TNFRSF11A;ARRB2;CTGF;CCL7;CCL4;GCNT2;CCL3;CHI3L1;CCL2;EPHB4;CD44		H3 histone acetyltransferase complex (GO:0070775)	1/7	0.205073	1	4.42968	7.01834	BRPF1		low-density lipoprotein receptor activity (GO:0005041)	2/13	0.0640347	1	4.77042	13.1107	LRP12;CXCL16
protein kinase B signaling (GO:0043491)	6/36	0.000937711	0.0839498	5.16796	36.0314	PLK3;CDKN1A;IL1B;CCL3;CCL2;ZFP36L1		multivesicular body lumen (GO:0097486)	1/7	0.205073	1	4.42968	7.01834	NAPSA		GTPase regulator activity (GO:0030695)	14/276	0.0644017	1	1.57286	4.31374	USP6NL;ERRFI1;RGS16;ARHGAP29;TBC1D9;IQGAP1;ABR;ADAP2;RGS1;CDC42EP4;ADPRH;SRGAP3;CPEB2;SIPA1
positive regulation of tumor necrosis factor-mediated signaling pathway (GO:1903265)	3/7	0.00106036	0.0932932	13.289	91.0186	CASP4;HSPA1B;HSPA1A		kinetochore microtubule (GO:0005828)	1/7	0.205073	1	4.42968	7.01834	CLASP1		phosphatidylinositol bisphosphate binding (GO:1902936)	6/88	0.0648633	1	2.11416	5.78324	SDCBP;SNX18;ADAP2;PLEK;SDCBP2;SNX20
eosinophil chemotaxis (GO:0048245)	5/25	0.00106746	0.0923266	6.20155	42.4339	LGALS3;CCL7;CCL4;CCL3;CCL2		messenger ribonucleoprotein complex (GO:1990124)	1/7	0.205073	1	4.42968	7.01834	CPEB2		cation-transporting ATPase activity (GO:0019829)	3/30	0.0712327	1	3.10078	8.19164	ATP2B2;ATP13A3;ATP7A
eosinophil migration (GO:0072677)	5/25	0.00106746	0.0907878	6.20155	42.4339	LGALS3;CCL7;CCL4;CCL3;CCL2		MOZ/MORF histone acetyltransferase complex (GO:0070776)	1/7	0.205073	1	4.42968	7.01834	BRPF1		acetylgalactosaminyltransferase activity (GO:0008376)	4/49	0.0727032	1	2.53125	6.63533	CSGALNACT1;B3GNT5;B4GALNT1;GALNT10
positive regulation of acute inflammatory response (GO:0002675)	4/15	0.00110126	0.0921264	8.26873	56.3209	IL1B;OSM;ADAM8;OSMR		AIM2 inflammasome complex (GO:0097169)	1/7	0.205073	1	4.42968	7.01834	CASP4		CARD domain binding (GO:0050700)	2/14	0.0731544	1	4.42968	11.5844	CASP4;CARD14
positive regulation of membrane protein ectodomain proteolysis (GO:0051044)	4/15	0.00110126	0.0906405	8.26873	56.3209	IL1B;ADAM8;TNFRSF1B;ADRA2A		pi-body (GO:0071546)	1/7	0.205073	1	4.42968	7.01834	PIWIL2		calcium-transporting ATPase activity (GO:0005388)	2/14	0.0731544	1	4.42968	11.5844	ATP2B2;ATP13A3
negative regulation of apoptotic process (GO:0043066)	29/486	0.00117019	0.0947851	1.85026	12.4903	FHL2;THBS1;FAM129B;HSP90B1;CLEC5A;FLNA;CCL2;BID;EPHB4;MAP4K4;PLK3;BNIP3L;XBP1;STAT3;F2R;PLAUR;MIF;TNFRSF1B;MMP9;BCL3;BIRC5;ADAM8;ANGPTL4;ITGA5;CARD14;HSPA1B;MYD88;CD44;HSPA1A		bicellular tight junction (GO:0005923)	4/73	0.209285	1	1.69905	2.65742	MICALL2;CLDN2;F11R;YBX3		cysteine-type endopeptidase activity involved in execution phase of apoptosis (GO:0097200)	2/14	0.0731544	1	4.42968	11.5844	CASP8;CASP4
regulation of ERK1 and ERK2 cascade (GO:0070372)	18/248	0.00120122	0.0957785	2.25056	15.1337	PTPN1;SEMA7A;F2R;PDGFB;MIF;FPR2;ARRB2;DUSP6;CTGF;CCL7;IL1B;CCL4;GCNT2;CCL3;CHI3L1;CCL2;EPHB4;CD44		late endosome membrane (GO:0031902)	3/49	0.209593	1	1.89843	2.96647	SLC11A1;LAMP2;LITAF		growth factor activity (GO:0008083)	5/70	0.0752662	1	2.21484	5.72918	IL11;PDGFB;OSM;INHBA;PGF
regulation of GTPase activity (GO:0043087)	15/189	0.00124399	0.0976624	2.46093	16.4622	USP6NL;RGS16;F2R;F11R;ABR;SNX18;CCL7;RGS1;CCL4;CCL3;CCL2;ITGA6;CPEB2;RAPGEF6;ARHGEF5		Golgi lumen (GO:0005796)	5/99	0.215333	1	1.56605	2.40477	SDC4;F10;PDGFB;BGN;SDC1		cytokine receptor binding (GO:0005126)	8/138	0.0785115	1	1.79755	4.57389	SDCBP;IL11;IL1RN;IL1B;OSM;MIF;INHBA;PGF
glycolytic process through glucose-6-phosphate (GO:0061620)	5/26	0.00128692	0.0995027	5.96303	39.6869	HK3;PFKL;PGAM1;ENO1;ENO2		chromatoid body (GO:0033391)	1/8	0.230718	1	3.87597	5.68433	PIWIL2		calcium ion binding (GO:0005509)	14/285	0.0790076	1	1.52319	3.86617	TPD52;TPM4;IQGAP1;SRI;THBS1;HSP90B1;MMP12;SELP;MMP13;SELL;ADAM8;LCP1;S100A9;S100A8
canonical glycolysis (GO:0061621)	5/26	0.00128692	0.0980175	5.96303	39.6869	HK3;PFKL;PGAM1;ENO1;ENO2		autolysosome (GO:0044754)	1/8	0.230718	1	3.87597	5.68433	LAMP2		protein phosphatase binding (GO:0019903)	6/93	0.0800564	1	2.0005	5.05131	MVP;STAT3;IQGAP1;KCNN4;CTTNBP2NL;HSP90B1
glucose catabolic process to pyruvate (GO:0061718)	5/26	0.00128692	0.0965761	5.96303	39.6869	HK3;PFKL;PGAM1;ENO1;ENO2		clathrin-sculpted gamma-aminobutyric acid transport vesicle membrane (GO:0061202)	1/8	0.230718	1	3.87597	5.68433	GAD1		acetylglucosaminyltransferase activity (GO:0008375)	4/51	0.0816437	1	2.43198	6.09306	EXT1;B3GNT5;GCNT1;GCNT2
positive regulation of peptidyl-tyrosine phosphorylation (GO:0050731)	11/117	0.00141943	0.104976	2.91526	19.1168	SOCS3;IL11;PTPN1;DLG3;CD80;STAT3;PDGFB;OSM;MIF;ITGA5;CD44		death-inducing signaling complex (GO:0031264)	1/8	0.230718	1	3.87597	5.68433	CASP8		interleukin-1 receptor binding (GO:0005149)	2/15	0.0826597	1	4.13437	10.3071	IL1RN;IL1B
glycosaminoglycan biosynthetic process (GO:0006024)	10/100	0.0014489	0.105625	3.10078	20.2696	CSGALNACT1;EXT1;B4GALT3;SDC4;CHST11;IL1B;BGN;GCNT2;SDC1;CHST2		lamellipodium membrane (GO:0031258)	1/8	0.230718	1	3.87597	5.68433	CD44		lipoprotein particle receptor activity (GO:0030228)	2/15	0.0826597	1	4.13437	10.3071	LRP12;CXCL16
chemokine-mediated signaling pathway (GO:0070098)	7/53	0.00149252	0.107272	4.09536	26.6497	CCL7;GPR35;CCL4;CCL3;CCL2;CXCL1;CXCL2		clathrin-sculpted gamma-aminobutyric acid transport vesicle (GO:0061200)	1/8	0.230718	1	3.87597	5.68433	GAD1		purinergic nucleotide receptor activity (GO:0001614)	2/15	0.0826597	1	4.13437	10.3071	PTAFR;GPR171
regulation of calcium ion transport (GO:0051924)	7/53	0.00149252	0.105782	4.09536	26.6497	SLN;F2R;CCL4;CCL3;STC1;SRI;ADRA2A		chromosomal region (GO:0098687)	4/77	0.236778	1	1.61079	2.32056	CENPT;INCENP;BIRC5;CDCA8		adrenergic receptor binding (GO:0031690)	2/15	0.0826597	1	4.13437	10.3071	ARRDC3;ADRA2A
positive regulation of IRE1-mediated unfolded protein response (GO:1903896)	3/8	0.00165599	0.115761	11.6279	74.4576	PTPN1;BCL2L11;HSPA1A		Golgi stack (GO:0005795)	2/29	0.239983	1	2.13847	3.05199	PLK3;GCNT1		cysteine-type endopeptidase inhibitor activity (GO:0004869)	4/52	0.0863079	1	2.38521	5.84337	CSTB;TNFSF14;BIRC5;KNG1
regulation of dendritic cell antigen processing and presentation (GO:0002604)	3/8	0.00165599	0.114196	11.6279	74.4576	SLC11A1;FCGR2B;THBS1		cytoskeleton (GO:0005856)	20/521	0.242519	1	1.19032	1.68629	TPM4;ARPC1B;MVP;TPM1;IQGAP1;CORO2A;NDRG1;CTTNBP2NL;SDCBP;RASSF1;CASP8;CDC42EP4;FLNA;FLNB;TAX1BP3;LCP1;VIM;SYNPO;S100A9;S100A8		G-protein coupled chemoattractant receptor activity (GO:0001637)	2/16	0.0925162	1	3.87597	9.22624	CX3CR1;CCR5
cellular response to molecule of bacterial origin (GO:0071219)	9/85	0.0016577	0.11279	3.28317	21.0199	ZFP36;XBP1;TNIP2;CD80;CCL2;CD14;CCR5;TNFRSF1B;FCGR2B		cortical actin cytoskeleton (GO:0030864)	3/53	0.243807	1	1.75516	2.47719	CAP1;SLC2A1;CORO1A		cysteine-type endopeptidase activity involved in apoptotic process (GO:0097153)	2/16	0.0925162	1	3.87597	9.22624	CASP8;CASP4
positive regulation of sequence-specific DNA binding transcription factor activity (GO:0051091)	16/216	0.00178655	0.119957	2.29687	14.5334	EDN1;BCL10;TNFRSF11A;TRAF1;NFKB2;IRAK2;IL1B;ADAM8;TCF3;S100A9;CARD14;ARHGEF5;HSPA1B;S100A8;MYD88;HSPA1A		lytic vacuole (GO:0000323)	8/184	0.243874	1	1.34816	1.9024	NAPSA;SLC11A1;LAMP2;CXCR4;BCL10;CTSS;CTSC;SGSH		alkali metal ion binding (GO:0031420)	2/16	0.0925162	1	3.87597	9.22624	ADPRH;ATP1A1
negative regulation of programmed cell death (GO:0043069)	25/409	0.00180095	0.119354	1.89534	11.9775	FHL2;YBX3;THBS1;FAM129B;HSP90B1;CLEC5A;FLNA;BID;EPHB4;MAP4K4;PLK3;BNIP3L;XBP1;STAT3;PLAUR;MIF;MMP9;BCL3;BIRC5;ANGPTL4;CARD14;HSPA1B;MYD88;CD44;HSPA1A		RISC-loading complex (GO:0070578)	1/9	0.255537	1	3.44531	4.70073	ZFP36		bile acid transmembrane transporter activity (GO:0015125)	2/16	0.0925162	1	3.87597	9.22624	ABCC3;SLC10A4
actin filament organization (GO:0007015)	11/121	0.00186144	0.121781	2.81889	17.7207	CAP1;TPM4;ACTN1;TPM1;FAT1;NEDD9;FLNA;ARPC4;LCP1;RHOC;RHOB		Swr1 complex (GO:0000812)	1/9	0.255537	1	3.44531	4.70073	TRRAP		glucuronosyltransferase activity (GO:0015020)	3/34	0.0957016	1	2.73598	6.42003	CSGALNACT1;EXT1;UGT1A10
positive regulation of angiogenesis (GO:0045766)	10/104	0.00194854	0.125866	2.98151	18.6067	XBP1;BTG1;IL1B;CHI3L1;ITGA5;ANGPTL4;THBS1;PGF;RUNX1;RHOB		pseudopodium (GO:0031143)	1/9	0.255537	1	3.44531	4.70073	ACTN1		transition metal ion binding (GO:0046914)	18/400	0.0983419	1	1.39535	3.23624	MOXD1;PTPN1;ARG2;TES;GCH1;ARG1;MEFV;PEX12;LITAF;MMP9;KNG1;MMP12;RASSF1;MMP13;ADAM8;ATP7A;S100A9;S100A8
positive regulation of protein phosphorylation (GO:0001934)	25/413	0.00205289	0.130949	1.87698	11.6157	CDKN1A;RALB;CD80;PDGFB;FPR2;IQGAP1;TNFRSF11A;C3;SDCBP;EPHB4;IL11;F2R;OSM;PLAUR;MIF;INHBA;TNFRSF1B;MMP9;ADRA2A;IL1B;CHI3L1;ITGA5;LTBR;CARD14;CD44		juxtaparanode region of axon (GO:0044224)	1/9	0.255537	1	3.44531	4.70073	CNTNAP2		CXCR chemokine receptor binding (GO:0045236)	2/17	0.102692	1	3.64797	8.30287	CXCL1;CXCL2
response to lipid (GO:0033993)	12/141	0.00207135	0.130495	2.63896	16.3076	SELP;GCH1;SLC11A1;F2R;STAT3;SPP1;CXCL1;TNFRSF11A;LTBR;TNFRSF1B;JUNB;CXCL2		late endosome lumen (GO:0031906)	1/9	0.255537	1	3.44531	4.70073	NAPSA		aspartic-type peptidase activity (GO:0070001)	2/17	0.102692	1	3.64797	8.30287	NAPSA;ASPRV1
positive regulation of vasculature development (GO:1904018)	10/105	0.00209298	0.13025	2.95312	18.2183	XBP1;BTG1;IL1B;PDGFB;CHI3L1;ANGPTL4;THBS1;PGF;RUNX1;RHOB		NLRP3 inflammasome complex (GO:0072559)	1/10	0.279557	1	3.10078	3.95209	CASP4		transferase activity, transferring hexosyl groups (GO:0016758)	6/101	0.10813	1	1.84204	4.09748	CSGALNACT1;EXT1;UGT1A10;B4GALT3;B3GNT5;FUT4
positive regulation of phosphate metabolic process (GO:0045937)	5/29	0.0021454	0.131903	5.34616	32.8491	SDCBP;ITGA6;BCL10;MIF;THBS1		primary lysosome (GO:0005766)	1/10	0.279557	1	3.10078	3.95209	SNAP23		endopeptidase activity (GO:0004175)	16/355	0.112902	1	1.39753	3.04834	NAPSA;F10;MMP3;ASPRV1;MMP9;CTSS;MMP10;C3;MMP12;ADAMTS4;MMP13;CASP8;CASP4;ADAM8;CTSC;ADAMTS7
positive regulation of extrinsic apoptotic signaling pathway (GO:2001238)	5/29	0.0021454	0.130333	5.34616	32.8491	BCL10;INHBA;LTBR;BID;THBS1		lateral element (GO:0000800)	1/10	0.279557	1	3.10078	3.95209	BRCA2		semaphorin receptor binding (GO:0030215)	2/18	0.113155	1	3.44531	7.50731	SEMA7A;SEMA3F
acute-phase response (GO:0006953)	4/18	0.00228602	0.137242	6.89061	41.9014	IL1RN;CEBPB;IL1B;SAA1		cell cortex region (GO:0099738)	1/11	0.302803	1	2.81889	3.36765	ENO1		zinc ion binding (GO:0008270)	14/303	0.114191	1	1.4327	3.10879	PTPN1;TES;GCH1;MEFV;PEX12;LITAF;MMP9;KNG1;MMP12;RASSF1;MMP13;ADAM8;S100A9;S100A8
sarcoplasmic reticulum calcium ion transport (GO:0070296)	3/9	0.00242467	0.143873	10.3359	62.2435	SLN;CCL3;CCR5		proton-transporting V-type ATPase complex (GO:0033176)	1/11	0.302803	1	2.81889	3.36765	TCIRG1		gamma-tubulin binding (GO:0043015)	2/19	0.123877	1	3.26397	6.81669	BRCA2;NDRG1
regulation of muscle system process (GO:0090257)	3/9	0.00242467	0.142219	10.3359	62.2435	SLN;TPM1;SRI		STAGA complex (GO:0030914)	1/11	0.302803	1	2.81889	3.36765	TRRAP		cadherin binding involved in cell-cell adhesion (GO:0098641)	2/19	0.123877	1	3.26397	6.81669	PDLIM1;S100A11
regulation of integrin activation (GO:0033623)	3/9	0.00242467	0.140603	10.3359	62.2435	SELP;FBLIM1;PLEK		filopodium (GO:0030175)	3/61	0.31426	1	1.52497	1.76521	SPATA13;LCP1;ACTG2		neuropilin binding (GO:0038191)	2/19	0.123877	1	3.26397	6.81669	SEMA7A;SEMA3F
positive regulation of protein homooligomerization (GO:0032464)	3/9	0.00242467	0.139023	10.3359	62.2435	BCL2L11;BID;RHOC		pericentric heterochromatin (GO:0005721)	1/12	0.3253	1	2.58398	2.90183	INCENP		cysteine-type endopeptidase activity (GO:0004197)	5/82	0.125284	1	1.89072	3.92734	CASP8;CASP4;SRI;CTSS;CTSC
negative regulation of protein secretion (GO:0050709)	6/43	0.00242578	0.137542	4.32666	26.0534	SRGN;MIDN;IL1B;F2R;FCGR2B;ADRA2A		neurotransmitter receptor complex (GO:0098878)	1/12	0.3253	1	2.58398	2.90183	DLG3		Rho guanyl-nucleotide exchange factor activity (GO:0005089)	4/60	0.127971	1	2.06718	4.25002	ABR;PLEKHG2;SPATA13;ARHGEF5
positive regulation of myeloid cell differentiation (GO:0045639)	5/30	0.00250711	0.140591	5.16796	30.949	TAL1;STAT3;INHBA;HSPA1B;HSPA1A		specific granule lumen (GO:0035580)	3/63	0.332033	1	1.47656	1.62794	ARG1;CHI3L1;CXCL1		glucose transmembrane transporter activity (GO:0005355)	2/20	0.134831	1	3.10078	6.21312	SLC2A1;SLC2A6
positive regulation of multicellular organismal process (GO:0051240)	15/203	0.0025088	0.139157	2.29121	13.7197	IL33;XBP1;SLC11A1;PDGFB;SOX11;ENO1;INHBA;METRNL;ADRA2A;FAM129B;C1QTNF3;SDCBP;IL1B;GCNT2;CLASP1		RNA polymerase II transcription factor complex (GO:0090575)	6/148	0.343434	1	1.25707	1.34351	GTF2A1;CEBPB;TRRAP;STAT3;TCF3;JUNB		sulfotransferase activity (GO:0008146)	3/40	0.137705	1	2.32558	4.61079	TPST2;CHST11;CHST2
positive regulation of cytokine secretion (GO:0050715)	8/74	0.00259607	0.142449	3.35219	19.9581	C1QTNF3;IL33;XBP1;F2R;SAA1;MIF;CD14;HAVCR2		membrane raft (GO:0045121)	5/120	0.345248	1	1.29199	1.37402	SDCBP;ZAP70;CD14;TNFRSF1B;SULF1		G-protein coupled receptor binding (GO:0001664)	7/134	0.142757	1	1.61981	3.15313	SDCBP;SAA1;FLNA;ADM;ARRB2;HSPA1B;HSPA1A
negative regulation of lymphocyte activation (GO:0051250)	4/19	0.00282251	0.153226	6.52795	38.3199	LGALS3;LST1;SOX11;FCGR2B		endoribonuclease complex (GO:1902555)	1/13	0.347072	1	2.38521	2.52409	ZFP36		protein kinase C binding (GO:0005080)	3/41	0.145233	1	2.26886	4.37757	UGT1A10;PLEK;AVPR1A
regulation of heterotypic cell-cell adhesion (GO:0034114)	4/19	0.00282251	0.151613	6.52795	38.3199	IL1RN;IL1B;GCNT2;CD44		germ plasm (GO:0060293)	1/13	0.347072	1	2.38521	2.52409	PIWIL2		protein tyrosine phosphatase activity (GO:0004725)	4/63	0.145411	1	1.96875	3.79612	PTPN1;PTPRE;DUSP6;CDKN3
positive regulation of blood coagulation (GO:0030194)	4/19	0.00282251	0.150034	6.52795	38.3199	SELP;PLEK;F2R;THBS1		nuclear nucleosome (GO:0000788)	1/14	0.368143	1	2.21484	2.21326	CENPT		PDZ domain binding (GO:0030165)	4/63	0.145411	1	1.96875	3.79612	ARHGAP29;ATP2B2;F11R;GNG12
connective tissue development (GO:0061448)	5/31	0.00291111	0.153148	5.00125	29.2034	XBP1;CHI3L1;ATP7A;SULF1;CD44		transcription factor TFTC complex (GO:0033276)	1/14	0.368143	1	2.21484	2.21326	TRRAP		sialyltransferase activity (GO:0008373)	2/21	0.145991	1	2.95312	5.68243	ST8SIA4;ST6GALNAC4
positive regulation of interleukin-8 production (GO:0032757)	6/45	0.00306971	0.159844	4.13437	23.9222	IL1B;F2R;BCL10;CD14;HSPA1B;HSPA1A		microtubule plus-end (GO:0035371)	1/14	0.368143	1	2.21484	2.21326	CLASP1		TBP-class protein binding (GO:0017025)	2/21	0.145991	1	2.95312	5.68243	GTF2A1;YEATS2
positive regulation of cellular process (GO:0048522)	29/520	0.00316673	0.16323	1.72928	9.9521	PDGFB;TNFRSF11A;TCIRG1;THBS1;CXCL16;CTGF;SDCBP;ESM1;SERTAD1;LMNA;GCNT2;FLNA;JUNB;IL11;XBP1;EDN1;F2R;OSM;SOX11;OSMR;PGF;ADRA2A;TAL1;IL1B;BIRC5;FCGR2B;IL7R;S100A9;S100A8		centriole (GO:0005814)	4/96	0.374634	1	1.29199	1.26848	CEP170;CAPG;HSPA1B;HSPA1A		solute:proton symporter activity (GO:0015295)	2/21	0.145991	1	2.95312	5.68243	SLC15A3;SLC2A6
positive regulation of JNK cascade (GO:0046330)	8/77	0.0033327	0.170068	3.22158	18.3758	SDCBP;EDN1;IL1B;TNFRSF11A;LTBR;FCGR2B;ARHGEF5;CTGF		integral component of Golgi membrane (GO:0030173)	2/41	0.382996	1	1.51257	1.45166	CSGALNACT1;STEAP2		aspartic-type endopeptidase activity (GO:0004190)	2/21	0.145991	1	2.95312	5.68243	NAPSA;ASPRV1
positive regulation of apoptotic signaling pathway (GO:2001235)	8/77	0.0033327	0.168384	3.22158	18.3758	BCL2L11;PLAUR;BCL10;LTBR;BID;MMP9;S100A9;S100A8		peroxisomal membrane (GO:0005778)	2/41	0.382996	1	1.51257	1.45166	FAR1;PEX12		peptidase activity, acting on L-amino acid peptides (GO:0070011)	9/186	0.148215	1	1.50038	2.86436	ADAMTS4;MMP12;NAPSA;CASP8;MMP3;ADAM8;MMP9;CTSC;ADAMTS7
regulation of cytokine secretion (GO:0050707)	5/32	0.00336008	0.168103	4.84496	27.5959	SRGN;C1QTNF3;SAA1;MIF;FCGR2B		Cul2-RING ubiquitin ligase complex (GO:0031462)	1/15	0.388534	1	2.06718	1.95426	ZSWIM6		ATPase binding (GO:0051117)	4/64	0.15142	1	1.93798	3.65832	RALB;SLN;ATP1B3;TCIRG1
regulation of epidermal cell differentiation (GO:0045604)	4/20	0.00343915	0.170388	6.20155	35.1785	ERRFI1;ZFP36;ZFP36L1;RUNX1		microtubule organizing center part (GO:0044450)	5/127	0.390192	1	1.22078	1.14889	CEP170;CAPG;CLASP1;HSPA1B;HSPA1A		UDP-glycosyltransferase activity (GO:0008194)	4/64	0.15142	1	1.93798	3.65832	CSGALNACT1;EXT1;UGT1A10;B3GNT5
positive regulation of leukocyte cell-cell adhesion (GO:1903039)	4/21	0.00414134	0.203204	5.90624	32.406	SIRPA;CCL2;SIRPB1;CD44		aggresome (GO:0016235)	2/42	0.394501	1	1.47656	1.3734	HSPA1B;HSPA1A		mRNA 3'-UTR binding (GO:0003730)	4/64	0.15142	1	1.93798	3.65832	ZFP36;YBX3;CPEB2;ZFP36L1
positive regulation of organelle assembly (GO:1902117)	6/48	0.0042639	0.207226	3.87597	21.1534	SDCBP;EDN1;RALB;SDC4;SDC1;LCP1		cytoplasmic vesicle (GO:0031410)	8/216	0.396066	1	1.14844	1.06365	USP6NL;SNX18;GCH1;CXCR4;ARRB2;RHOC;RAPGEF6;RHOB		protein binding involved in cell-cell adhesion (GO:0098632)	2/22	0.157331	1	2.81889	5.21326	PDLIM1;S100A11
positive regulation of cell-cell adhesion (GO:0022409)	5/34	0.00440382	0.212006	4.55996	24.7391	IL1B;GCNT2;SIRPA;SIRPB1;CD44		P granule (GO:0043186)	1/16	0.408269	1	1.93798	1.7361	PIWIL2		cysteine-type peptidase activity (GO:0008234)	4/66	0.163715	1	1.87926	3.40076	CASP8;CASP4;CTSS;CTSC
cellular response to tumor necrosis factor (GO:0071356)	14/195	0.00444385	0.211934	2.2262	12.0576	TNFSF14;TNFRSF11A;TNFRSF1B;YBX3;ZFP36L1;ZFP36;CCL7;CCL4;CCL3;CHI3L1;CCL2;LTBR;CARD14;ADAMTS7		intermediate filament cytoskeleton (GO:0045111)	3/72	0.411312	1	1.29199	1.14781	SLC1A4;VIM;S100A8		bile acid:sodium symporter activity (GO:0008508)	1/6	0.178574	1	5.16796	8.90311	SLC10A4
negative regulation of leukocyte activation (GO:0002695)	3/11	0.00453852	0.214445	8.45666	45.625	CD300A;FCGR2B;HAVCR2		coated vesicle (GO:0030135)	3/72	0.411312	1	1.29199	1.14781	TMED9;SNX18;CTSC		vascular endothelial growth factor receptor 2 binding (GO:0043184)	1/6	0.178574	1	5.16796	8.90311	ITGA5
urea cycle (GO:0000050)	3/11	0.00453852	0.212478	8.45666	45.625	ARG2;ARG1;ASS1		fibrillar center (GO:0001650)	5/132	0.422191	1	1.17454	1.0128	KLF6;FBLIM1;TAX1BP3;NFKBIE;RAI14		pancreatic polypeptide receptor activity (GO:0001602)	1/6	0.178574	1	5.16796	8.90311	PROKR1
cellular response to hormone stimulus (GO:0032870)	8/81	0.00455574	0.211345	3.06249	16.511	XBP1;STAT3;AVPR1A;ATP1A1;JUNB;CTSS;ADRA2A;ZFP36L1		mRNA cleavage and polyadenylation specificity factor complex (GO:0005847)	1/17	0.427367	1	1.82399	1.55059	CSTF2		vasopressin receptor activity (GO:0005000)	1/6	0.178574	1	5.16796	8.90311	AVPR1A
negative regulation of cellular process (GO:0048523)	29/535	0.00471081	0.21657	1.68079	9.00552	PIWIL2;COL18A1;CDKN1A;IFITM1;TES;BTG1;CXCL1;ENO1;KNG1;FAM129B;CTGF;CCDC85B;LMNA;S100A11;BNIP3L;ACTN1;F2R;OSM;SOX11;MIF;INHBA;RHOB;DLG3;IL1B;ALDH1A2;HSPA1B;SIPA1;HSPA1A;CDKN3		early endosome membrane (GO:0031901)	3/74	0.428585	1	1.25707	1.06507	INPP5F;LITAF;SNX20		alpha-N-acetylgalactosaminide alpha-2,6-sialyltransferase activity (GO:0001665)	1/6	0.178574	1	5.16796	8.90311	ST6GALNAC4
cellular response to mechanical stimulus (GO:0071260)	6/49	0.00472919	0.215474	3.79687	20.3284	CASP8;TNFSF14;IL1B;BCL10;LTBR;MYD88		anchored component of external side of plasma membrane (GO:0031362)	1/18	0.445851	1	1.72265	1.39151	CD14		alpha-N-acetylneuraminate alpha-2,8-sialyltransferase activity (GO:0003828)	1/6	0.178574	1	5.16796	8.90311	ST8SIA4
cellular response to decreased oxygen levels (GO:0036294)	7/65	0.00483961	0.218553	3.3393	17.8015	BNIP3L;LMNA;ADAM8;P4HB;NDRG1;CPEB2;ZFP36L1		ESC/E(Z) complex (GO:0035098)	1/18	0.445851	1	1.72265	1.39151	MTF2		chondroitin sulfotransferase activity (GO:0034481)	1/6	0.178574	1	5.16796	8.90311	CHST11
regulation of vascular endothelial growth factor receptor signaling pathway (GO:0030947)	4/22	0.00493428	0.220874	5.63777	29.9453	PTPN1;IL1B;ITGA5;FAM129B		intermediate filament (GO:0005882)	2/47	0.450436	1	1.31948	1.05234	SLC1A4;VIM		alpha-adrenergic receptor activity (GO:0004936)	1/6	0.178574	1	5.16796	8.90311	ADRA2A
regulation of membrane protein ectodomain proteolysis (GO:0051043)	4/22	0.00493428	0.218953	5.63777	29.9453	IL1B;ADAM8;TNFRSF1B;ADRA2A		recycling endosome membrane (GO:0055038)	2/48	0.461271	1	1.29199	0.999701	EHD4;NDRG1		manganese ion transmembrane transporter activity (GO:0005384)	1/6	0.178574	1	5.16796	8.90311	SLC11A1
positive regulation of MAP kinase activity (GO:0043406)	13/178	0.00520606	0.229022	2.26461	11.9072	EDN1;F2R;PDGFB;CXCR4;TNFRSF11A;THBS1;ADRA2A;DUSP6;IRAK2;IL1B;SAA1;ADAM8;ARHGEF5		endoplasmic reticulum-Golgi intermediate compartment membrane (GO:0033116)	2/48	0.461271	1	1.29199	0.999701	TMED9;CTSC		solute:proton antiporter activity (GO:0015299)	1/6	0.178574	1	5.16796	8.90311	SLC11A1
regulation of phosphorylation (GO:0042325)	10/120	0.0054921	0.23954	2.58398	13.4482	SDCBP;CDKN1A;SRPX2;PGAM1;ITGA6;MIF;BCL10;INHBA;ATP7A;THBS1		condensed chromosome kinetochore (GO:0000777)	1/19	0.463738	1	1.63199	1.25408	BIRC5		peptidyl-proline 4-dioxygenase activity (GO:0031545)	1/6	0.178574	1	5.16796	8.90311	P4HB
positive regulation of homeostatic process (GO:0032846)	8/84	0.00567929	0.245605	2.95312	15.2704	TAL1;STAT3;SPP1;ADAM8;INHBA;METRNL;HSPA1B;HSPA1A		late endosome (GO:0005770)	5/141	0.47888	1	1.09957	0.809616	SLC11A1;LAMP2;F2R;CXCR4;ATP7A		phosphatidylethanolamine binding (GO:0008429)	1/6	0.178574	1	5.16796	8.90311	CD300A
glycolytic process (GO:0006096)	4/23	0.00582296	0.249702	5.39265	27.7503	HK3;PFKL;PGAM1;ENO2		lytic vacuole membrane (GO:0098852)	8/234	0.483916	1	1.06009	0.769464	ATP6V1A;PI4K2B;LAMP2;ATP6V1H;TCIRG1;SLC15A3;CP;LITAF		cuprous ion binding (GO:1903136)	1/6	0.178574	1	5.16796	8.90311	ATP7A
positive regulation of protein oligomerization (GO:0032461)	4/23	0.00582296	0.247621	5.39265	27.7503	BCL2L11;MMP3;RHOC;BID		endolysosome (GO:0036019)	1/21	0.497802	1	1.47656	1.02998	CTSS		interleukin-1 binding (GO:0019966)	1/6	0.178574	1	5.16796	8.90311	IL1RN
regulation of apoptotic process (GO:0042981)	40/816	0.00582436	0.245634	1.51999	7.82141	FHL2;BCL10;TNFRSF11A;NDRG1;THBS1;KNG1;FAM129B;HSP90B1;ABR;BCL2L11;CLEC5A;FLNA;HS1BP3;BID;EPHB4;MAP4K4;PLK3;BNIP3L;XBP1;PLEKHG2;ACTN1;STAT3;PLAUR;MIF;INHBA;TNFRSF1B;MMP9;DUSP6;RHOB;BCL3;BIRC5;ITGA6;ANGPTL4;LTBR;CARD14;HSPA1B;MYD88;ARHGEF5;CD44;HSPA1A		anaphase-promoting complex (GO:0005680)	1/21	0.497802	1	1.47656	1.02998	CDC20		phosphatidylinositol phosphate phosphatase activity (GO:0052866)	1/6	0.178574	1	5.16796	8.90311	INPP5F
regulation of interleukin-2 biosynthetic process (GO:0045076)	3/12	0.00590757	0.247101	7.75194	39.7792	ZFP36;CD80;IL1B		microtubule end (GO:1990752)	1/22	0.514015	1	1.40944	0.93799	CLASP1		1-phosphatidylinositol 4-kinase activity (GO:0004430)	1/6	0.178574	1	5.16796	8.90311	PI4K2B
positive regulation of heterotypic cell-cell adhesion (GO:0034116)	3/12	0.00590757	0.245092	7.75194	39.7792	IL1B;GCNT2;CD44		INO80-type complex (GO:0097346)	1/22	0.514015	1	1.40944	0.93799	TRRAP		phospholipase activator activity (GO:0016004)	1/6	0.178574	1	5.16796	8.90311	CCL3
positive regulation of endoplasmic reticulum unfolded protein response (GO:1900103)	3/12	0.00590757	0.243116	7.75194	39.7792	PTPN1;XBP1;BCL2L11		mitochondrial outer membrane (GO:0005741)	4/116	0.51732	1	1.06923	0.704724	BNIP3L;BCL2L11;CASP8;BID		protein kinase binding (GO:0019901)	20/496	0.181326	1	1.25031	2.13486	IFNAR2;UGT1A10;PTPN1;ERRFI1;CDKN1A;GCH1;PGAM1;MVP;STAT3;PLEK;BCL10;IQGAP1;AVPR1A;RHOC;ADRA2A;RHOB;ZFP36;TNIP2;TCF3;EPHB4
positive regulation of T cell activation (GO:0050870)	7/69	0.00671914	0.274302	3.14571	15.7374	ZAP70;XBP1;CD80;IL1B;SIRPA;CCL2;SIRPB1		cytoplasmic vesicle membrane (GO:0030659)	2/55	0.533438	1	1.12755	0.70857	APPBP2;YWHAH		protease binding (GO:0002020)	6/119	0.186633	1	1.56342	2.62436	ADAMTS4;CSTB;SELL;BCL10;SRI;BRCA2
positive regulation of proteolysis (GO:0045862)	6/53	0.00696912	0.282249	3.51031	17.4331	CASP8;IL1B;ADAM8;TNFRSF1B;CTSC;ADRA2A		recycling endosome (GO:0055037)	4/120	0.544121	1	1.03359	0.629027	EHD4;INPP5F;MICALL2;NDRG1		serine-type endopeptidase activity (GO:0004252)	9/197	0.18721	1	1.4166	2.37354	C3;MMP12;MMP13;F10;MMP3;ADAM8;MMP9;CTSS;MMP10
positive regulation of smooth muscle cell proliferation (GO:0048661)	5/38	0.00714904	0.287256	4.07997	20.1582	EDN1;ID2;PDGFB;THBS1;MMP9		pre-autophagosomal structure (GO:0000407)	1/24	0.544889	1	1.29199	0.784461	ATG2A		UDP-galactosyltransferase activity (GO:0035250)	2/25	0.192211	1	2.48062	4.09094	B4GALT3;B3GNT5
actin filament bundle assembly (GO:0051017)	5/38	0.00714904	0.285012	4.07997	20.1582	NEDD9;LCP1;RHOC;HSP90B1;RHOB		nucleolar part (GO:0044452)	5/154	0.557059	1	1.00675	0.589031	KLF6;FBLIM1;TAX1BP3;NFKBIE;RAI14		phosphatidylinositol-3,4-bisphosphate binding (GO:0043325)	2/25	0.192211	1	2.48062	4.09094	ADAP2;PLEK
toll-like receptor 9 signaling pathway (GO:0034162)	3/13	0.00749767	0.296594	7.15564	35.0137	TNIP2;IRAK2;MYD88		trans-Golgi network (GO:0005802)	6/186	0.55745	1	1.00025	0.584529	USP6NL;PI4K2B;NCF4;GCNT1;ATP7A;CHST2		phosphatidylinositol phospholipase C activity (GO:0004435)	2/25	0.192211	1	2.48062	4.09094	EDNRA;CCR5
negative regulation of cell proliferation (GO:0008285)	21/364	0.00767539	0.301288	1.78891	8.71151	COL18A1;IFITM1;CDKN1A;TES;BTG1;CD300A;F2R;OSM;SOX11;CXCL1;INHBA;FAM129B;DLG3;ID2;IL1B;ALDH1A2;LMNA;S100A11;HSPA1B;HSPA1A;CDKN3		endosome lumen (GO:0031904)	1/25	0.559584	1	1.24031	0.720076	CTSS		myosin binding (GO:0017022)	3/47	0.192913	1	1.97922	3.25683	MYH8;CXCR4;CORO1A
response to glucocorticoid (GO:0051384)	4/25	0.00790638	0.307987	4.96124	24.0128	IL1RN;ZFP36;BCL2L11;ZFP36L1		spindle (GO:0005819)	6/187	0.562712	1	0.994901	0.572055	CDC20;INCENP;CDCA8;NEDD9;CAPG;CLASP1		oxidoreductase activity, acting on the aldehyde or oxo group of donors, NAD or NADP as acceptor (GO:0016620)	2/26	0.204055	1	2.38521	3.79097	ALDH1A2;FAR1
ATP generation from ADP (GO:0006757)	4/25	0.00790638	0.305653	4.96124	24.0128	HK3;PFKL;PGAM1;ENO2		perinuclear region of cytoplasm (GO:0048471)	12/379	0.567177	1	0.981776	0.55675	TPD52;MVP;FAT1;BCL10;LCP1;ATP7A;NDRG1;YBX3;HSPA1B;HSPA1A;CDKN3;HSP90B1		actin monomer binding (GO:0003785)	2/26	0.204055	1	2.38521	3.79097	MYL4;CORO1A
regulation of chemotaxis (GO:0050920)	4/25	0.00790638	0.303355	4.96124	24.0128	PDGFB;CXCR4;ZSWIM6;THBS1		azurophil granule membrane (GO:0035577)	2/59	0.571603	1	1.05111	0.587898	GLIPR1;LAMP2		cation:cation antiporter activity (GO:0015491)	1/7	0.205073	1	4.42968	7.01834	SLC11A1
negative regulation of T cell proliferation (GO:0042130)	4/25	0.00790638	0.301091	4.96124	24.0128	CEBPB;SDC4;ARG1;CD80		nuclear inner membrane (GO:0005637)	1/26	0.573805	1	1.19261	0.662451	MATR3		MAP kinase tyrosine/serine/threonine phosphatase activity (GO:0017017)	1/7	0.205073	1	4.42968	7.01834	DUSP6
muscle filament sliding (GO:0030049)	5/39	0.00798752	0.301928	3.97535	19.2005	MYL4;TPM4;TPM1;MYH8;VIM		peroxisome (GO:0005777)	3/93	0.580828	1	1.00025	0.543437	FAR1;VIM;PEX12		lipase activator activity (GO:0060229)	1/7	0.205073	1	4.42968	7.01834	CCL3
actin-myosin filament sliding (GO:0033275)	5/39	0.00798752	0.299708	3.97535	19.2005	MYL4;TPM4;TPM1;MYH8;VIM		microbody (GO:0042579)	3/93	0.580828	1	1.00025	0.543437	FAR1;VIM;PEX12		N-acetylglucosamine 6-O-sulfotransferase activity (GO:0001517)	1/7	0.205073	1	4.42968	7.01834	CHST2
regulation of inflammatory response (GO:0050727)	12/167	0.00805283	0.299953	2.2281	10.7433	C1QTNF3;IL33;SEMA7A;CASP4;CCL4;CCL3;SAA1;METRNL;MEFV;S100A9;S100A8;MYD88		early endosome (GO:0005769)	7/223	0.582238	1	0.973338	0.526454	CNTNAP2;PTPN1;INPP5F;F2R;CXCR4;SNX20;STEAP2		inositol-1,3,4,5-tetrakisphosphate 5-phosphatase activity (GO:0052659)	1/7	0.205073	1	4.42968	7.01834	INPP5D
skeletal system development (GO:0001501)	11/147	0.00818199	0.302556	2.32031	11.151	EXT1;ADAMTS4;PRDX1;COL12A1;STC1;CHI3L1;SOX11;ATP7A;SULF1;ETS2;CD44		condensed chromosome, centromeric region (GO:0000779)	1/27	0.587568	1	1.14844	0.610696	BIRC5		alanine transmembrane transporter activity (GO:0022858)	1/7	0.205073	1	4.42968	7.01834	SLC1A4
positive regulation of fat cell differentiation (GO:0045600)	5/40	0.00889187	0.32644	3.87597	18.3047	CEBPB;ZFP36;XBP1;METRNL;ZFP36L1		lysosomal membrane (GO:0005765)	9/292	0.602083	1	0.955718	0.484893	ATP6V1A;PI4K2B;GLIPR1;LAMP2;ATP6V1H;TCIRG1;SLC15A3;CP;LITAF		retinal dehydrogenase activity (GO:0001758)	1/7	0.205073	1	4.42968	7.01834	ALDH1A2
glycoprotein biosynthetic process (GO:0009101)	7/73	0.00909315	0.331445	2.97335	13.9754	CSGALNACT1;B3GNT5;GCNT1;ST8SIA4;GCNT2;ATP7A;FUT4		endoplasmic reticulum-Golgi intermediate compartment (GO:0005793)	3/96	0.60243	1	0.968992	0.491069	TMED9;P4HB;CTSC		peptidyl-proline dioxygenase activity (GO:0031543)	1/7	0.205073	1	4.42968	7.01834	P4HB
negative regulation of insulin receptor signaling pathway (GO:0046627)	4/26	0.00910992	0.329702	4.77042	22.4133	SOCS3;PTPN1;PTPRE;IL1B		synaptonemal complex (GO:0000795)	1/29	0.613776	1	1.06923	0.521919	BRCA2		L-proline transmembrane transporter activity (GO:0015193)	1/7	0.205073	1	4.42968	7.01834	SLC1A4
epiboly involved in wound healing (GO:0090505)	3/14	0.00931651	0.334804	6.64452	31.0696	FLNA;RHOC;CD44		rough endoplasmic reticulum (GO:0005791)	1/29	0.613776	1	1.06923	0.521919	TRAM1		phosphatidylinositol phosphate 4-phosphatase activity (GO:0034596)	1/7	0.205073	1	4.42968	7.01834	INPP5F
positive regulation of heart rate (GO:0010460)	3/14	0.00931651	0.332463	6.64452	31.0696	EDN1;TPM1;ADM		autophagosome (GO:0005776)	2/65	0.6245	1	0.954085	0.449187	RALB;LAMP2		cation:sugar symporter activity (GO:0005402)	1/7	0.205073	1	4.42968	7.01834	SLC2A6
positive regulation of wound healing (GO:0090303)	4/27	0.0104268	0.369499	4.59374	20.963	XBP1;F2R;THBS1;ADRA2A		multivesicular body (GO:0005771)	1/30	0.62625	1	1.03359	0.483727	NAPSA		L-alanine transmembrane transporter activity (GO:0015180)	1/7	0.205073	1	4.42968	7.01834	SLC1A4
negative regulation of cellular response to insulin stimulus (GO:1900077)	4/27	0.0104268	0.366951	4.59374	20.963	SOCS3;PTPN1;PTPRE;IL1B		spindle midzone (GO:0051233)	1/31	0.638321	1	1.00025	0.449026	CDCA8		chitinase activity (GO:0004568)	1/7	0.205073	1	4.42968	7.01834	CHI3L1
positive regulation of release of cytochrome c from mitochondria (GO:0090200)	4/27	0.0104268	0.364437	4.59374	20.963	BCL2L11;PLAUR;BID;MMP9		cytoplasmic ribonucleoprotein granule (GO:0036464)	5/171	0.649635	1	0.906659	0.391083	PIWIL2;ZFP36;NFKBIZ;IQGAP1;ZFP36L1		neuropeptide Y receptor activity (GO:0004983)	1/7	0.205073	1	4.42968	7.01834	PROKR1
regulation of T cell receptor signaling pathway (GO:0050856)	4/27	0.0104268	0.361958	4.59374	20.963	LGALS3;CD300A;KCNN4;LILRB4		intercalated disc (GO:0014704)	1/32	0.650004	1	0.968992	0.41742	YWHAH		Rho GTPase binding (GO:0017048)	4/73	0.209285	1	1.69905	2.65742	CDC42EP4;FLNA;SRGAP3;YBX3
regulation of phagocytosis (GO:0050764)	5/42	0.0109077	0.376094	3.6914	16.6788	SLC11A1;IL1B;SIRPA;FCGR2B;SIRPB1		P-body (GO:0000932)	2/69	0.656868	1	0.898775	0.37773	ZFP36;ZFP36L1		transcriptional repressor activity, RNA polymerase II core promoter proximal region sequence-specific binding (GO:0001078)	5/98	0.209543	1	1.58203	2.47244	TGIF1;CEBPB;ENO1;TCF3;ETS2
cellular response to peptide (GO:1901653)	5/42	0.0109077	0.37357	3.6914	16.6788	XBP1;CASP4;FPR2;FCGR2B;ZFP36L1		main axon (GO:0044304)	1/34	0.67225	1	0.911993	0.362175	CNTNAP2		carboxy-lyase activity (GO:0016831)	2/27	0.215977	1	2.29687	3.52015	HDC;GAD1
positive regulation of cell proliferation (GO:0008284)	23/425	0.0112644	0.383213	1.67807	7.528	IL11;CDKN1A;XBP1;EDN1;F2R;PDGFB;OSM;SOX11;TNFRSF11A;TCIRG1;MIF;OSMR;THBS1;PGF;ADRA2A;SDCBP;ESM1;SERTAD1;ID2;IL1B;GCNT2;BIRC5;IL7R		microtubule (GO:0005874)	6/211	0.678937	1	0.881737	0.341432	TUBB6;SAA1;BCL10;IQGAP1;NDRG1;CLASP1		L-amino acid transmembrane transporter activity (GO:0015179)	3/50	0.21805	1	1.86047	2.83355	SLC7A7;SLC1A4;SLC7A11
regulation of protein homooligomerization (GO:0032462)	3/15	0.0113703	0.384257	6.20155	27.7628	BCL2L11;RHOC;BID		nuclear transcription factor complex (GO:0044798)	2/72	0.679651	1	0.861326	0.332623	STAT3;TCF3		phospholipase C activity (GO:0004629)	2/28	0.227958	1	2.21484	3.27485	EDNRA;CCR5
regulation of B cell differentiation (GO:0045577)	3/15	0.0113703	0.381729	6.20155	27.7628	XBP1;INHBA;ZFP36L1		transcription factor TFIID complex (GO:0005669)	1/36	0.693084	1	0.861326	0.315766	GTF2A1		protein kinase B binding (GO:0043422)	1/8	0.230718	1	3.87597	5.68433	BCL10
positive regulation of exosomal secretion (GO:1903543)	3/15	0.0113703	0.379234	6.20155	27.7628	SDCBP;SDC4;SDC1		peroxisomal part (GO:0044439)	2/76	0.70809	1	0.815993	0.281668	FAR1;PEX12		alpha-(1->3)-fucosyltransferase activity (GO:0046920)	1/8	0.230718	1	3.87597	5.68433	FUT4
regulation of lymphocyte proliferation (GO:0050670)	3/15	0.0113703	0.376771	6.20155	27.7628	LGALS3;LST1;SOX11		COPII-coated ER to Golgi transport vesicle (GO:0030134)	2/76	0.70809	1	0.815993	0.281668	TMED9;CTSC		3-chloroallyl aldehyde dehydrogenase activity (GO:0004028)	1/8	0.230718	1	3.87597	5.68433	ALDH1A2
cellular response to corticosteroid stimulus (GO:0071384)	3/15	0.0113703	0.374341	6.20155	27.7628	ZFP36;BCL2L11;ZFP36L1		ionotropic glutamate receptor complex (GO:0008328)	1/40	0.730869	1	0.775194	0.243039	DLG3		beta-N-acetylglucosaminylglycopeptide beta-1,4-galactosyltransferase activity (GO:0003831)	1/8	0.230718	1	3.87597	5.68433	B4GALT3
negative regulation of peptidyl-tyrosine phosphorylation (GO:0050732)	4/28	0.0118607	0.387982	4.42968	19.6435	SOCS3;INPP5F;CD300A;MVP		anchored component of plasma membrane (GO:0046658)	1/41	0.739566	1	0.756287	0.228166	CD14		3-hydroxyacyl-CoA dehydrogenase activity (GO:0003857)	1/8	0.230718	1	3.87597	5.68433	HSD17B12
regulation of extrinsic apoptotic signaling pathway in absence of ligand (GO:2001239)	4/28	0.0118607	0.385511	4.42968	19.6435	IL1B;INHBA;HSPA1B;HSPA1A		condensed chromosome (GO:0000793)	1/41	0.739566	1	0.756287	0.228166	MKI67		phosphofructokinase activity (GO:0008443)	1/8	0.230718	1	3.87597	5.68433	PFKL
negative regulation of extrinsic apoptotic signaling pathway (GO:2001237)	7/77	0.01203	0.388538	2.81889	12.4605	LGALS3;CASP8;IL1B;ITGA6;THBS1;HSPA1B;HSPA1A		ribonucleoprotein granule (GO:0035770)	2/81	0.740641	1	0.765624	0.229871	NFKBIZ;IQGAP1		activin receptor binding (GO:0070697)	1/8	0.230718	1	3.87597	5.68433	INHBA
negative regulation of homeostatic process (GO:0032845)	4/29	0.0134152	0.430551	4.27693	18.4394	ZFP36;BCL10;ADRA2A;ZFP36L1		nuclear speck (GO:0016607)	8/297	0.745613	1	0.835226	0.245179	ADAMTS4;BRD2;BNIP3L;NFKBIZ;TCF3;SDCBP2;HSPA1B;HSPA1A		epinephrine binding (GO:0051379)	1/8	0.230718	1	3.87597	5.68433	ADRA2A
positive regulation of protein tyrosine kinase activity (GO:0061098)	4/29	0.0134152	0.42786	4.27693	18.4394	PTPN1;DLG3;PDGFB;ADRA2A		clathrin-coated vesicle membrane (GO:0030665)	2/82	0.746766	1	0.756287	0.220838	GAD1;IL7R		NADP-retinol dehydrogenase activity (GO:0052650)	1/8	0.230718	1	3.87597	5.68433	RDH12
lipopolysaccharide-mediated signaling pathway (GO:0031663)	3/16	0.013664	0.433089	5.81395	24.9593	IL1B;CCL3;CCL2		heterochromatin (GO:0000792)	1/42	0.747982	1	0.73828	0.214379	INCENP		hydrogen ion transmembrane transporter activity (GO:0015078)	3/52	0.235163	1	1.78891	2.58941	ATP6V1A;ATP6V1H;TCIRG1
leukocyte tethering or rolling (GO:0050901)	3/16	0.013664	0.430416	5.81395	24.9593	SELP;SELL;GCNT1		nuclear ubiquitin ligase complex (GO:0000152)	1/42	0.747982	1	0.73828	0.214379	CDC20		GTPase binding (GO:0051020)	4/77	0.236778	1	1.61079	2.32056	ADAP2;FLNA;ENO1;LCP1
regulation of exosomal secretion (GO:1903541)	3/16	0.013664	0.427775	5.81395	24.9593	SDCBP;SDC4;SDC1		cytoplasmic stress granule (GO:0010494)	1/42	0.747982	1	0.73828	0.214379	ZFP36		protein homodimerization activity (GO:0042803)	25/665	0.242179	1	1.1657	1.65306	UGT1A10;CEBPB;PLEK;PDGFB;ENO1;CORO1A;PVR;INPP5F;IRAK2;FLNA;S100A11;TPD52;BNIP3L;TPM4;GCH1;ACTN1;SLC11A1;STAT3;TPM1;SDCBP2;ADRA2A;EXT1;TPST2;PECAM1;TCF3
leukocyte adhesion to vascular endothelial cell (GO:0061756)	3/16	0.013664	0.425167	5.81395	24.9593	SELP;SELL;GCNT1		microvillus (GO:0005902)	1/43	0.756127	1	0.721111	0.201584	CD44		Ras GTPase binding (GO:0017016)	8/185	0.248348	1	1.34088	1.86774	USP6NL;ADPRH;TBC1D9;BIRC5;FLNA;NDRG1;YBX3;RAPGEF6
T cell migration (GO:0072678)	3/16	0.013664	0.42259	5.81395	24.9593	ZAP70;CCL3;CXCL16		microbody lumen (GO:0031907)	1/43	0.756127	1	0.721111	0.201584	FAR1		WW domain binding (GO:0050699)	2/30	0.252037	1	2.06718	2.84895	NFE2;LITAF
regulation of glucose transport (GO:0010827)	3/16	0.013664	0.420044	5.81395	24.9593	C3;IL1B;SLC2A1		peroxisomal matrix (GO:0005782)	1/43	0.756127	1	0.721111	0.201584	FAR1		complement component C1q binding (GO:0001849)	1/9	0.255537	1	3.44531	4.70073	CD93
positive regulation of response to endoplasmic reticulum stress (GO:1905898)	3/16	0.013664	0.417529	5.81395	24.9593	XBP1;BCL2L11;FCGR2B		cell cortex part (GO:0044448)	1/45	0.771636	1	0.689061	0.178634	ENO1		MAP kinase phosphatase activity (GO:0033549)	1/9	0.255537	1	3.44531	4.70073	DUSP6
regulation of cytosolic calcium ion concentration (GO:0051480)	10/138	0.014051	0.426798	2.24694	9.58334	EDNRA;EDN1;GPR35;F2R;SAA1;CXCR4;ATP2B2;FPR2;CCR5;KNG1		DNA-directed RNA polymerase II, holoenzyme (GO:0016591)	2/91	0.796491	1	0.681489	0.155065	GTF2A1;TRRAP		UDP-glucosyltransferase activity (GO:0035251)	1/9	0.255537	1	3.44531	4.70073	UGCG
regulation of glomerular filtration (GO:0003093)	2/6	0.0142892	0.431465	10.3359	43.9096	F2R;PDGFB		histone methyltransferase complex (GO:0035097)	1/50	0.806236	1	0.620155	0.133568	MTF2		peptide disulfide oxidoreductase activity (GO:0015037)	1/9	0.255537	1	3.44531	4.70073	P4HB
cellular triglyceride homeostasis (GO:0035356)	2/6	0.0142892	0.428927	10.3359	43.9096	C1QTNF3;XBP1		spindle microtubule (GO:0005876)	1/50	0.806236	1	0.620155	0.133568	CLASP1		glucocorticoid receptor binding (GO:0035259)	1/9	0.255537	1	3.44531	4.70073	YWHAH
heparan sulfate proteoglycan biosynthetic process, polysaccharide chain biosynthetic process (GO:0015014)	2/6	0.0142892	0.426419	10.3359	43.9096	CSGALNACT1;EXT1		microtubule cytoskeleton (GO:0015630)	10/389	0.809003	1	0.797114	0.168951	CDC20;TUBB6;RASSF1;INCENP;CDC42EP4;NEDD9;SLC1A4;IQGAP1;NDRG1;CLASP1		inositol tetrakisphosphate phosphatase activity (GO:0052743)	1/9	0.255537	1	3.44531	4.70073	INPP5D
regulation of adiponectin secretion (GO:0070163)	2/6	0.0142892	0.42394	10.3359	43.9096	C1QTNF3;IL1B		Golgi cisterna (GO:0031985)	1/51	0.8125	1	0.607995	0.126244	GCNT1		MHC protein binding (GO:0042287)	2/31	0.264105	1	2.0005	2.66349	CLEC7A;PILRA
negative regulation of leukocyte degranulation (GO:0043301)	2/6	0.0142892	0.421489	10.3359	43.9096	CD300A;FCGR2B		clathrin-coated endocytic vesicle (GO:0045334)	1/51	0.8125	1	0.607995	0.126244	INPP5F		glutathione transferase activity (GO:0004364)	2/31	0.264105	1	2.0005	2.66349	GSTO2;ALOX5AP
positive regulation of myeloid leukocyte cytokine production involved in immune response (GO:0061081)	2/6	0.0142892	0.419067	10.3359	43.9096	SEMA7A;BCL10		nuclear chromosome (GO:0000228)	1/53	0.824429	1	0.585052	0.112953	BIRC5		phosphatidylinositol phosphate binding (GO:1901981)	4/82	0.272225	1	1.51257	1.96805	ADAP2;NCF4;IQGAP1;SNX20
release of sequestered calcium ion into cytosol by sarcoplasmic reticulum (GO:0014808)	2/6	0.0142892	0.416672	10.3359	43.9096	CCL3;CCR5		chromosome (GO:0005694)	2/98	0.828991	1	0.632811	0.118681	BIRC5;MKI67		phosphatidylinositol-3-phosphate binding (GO:0032266)	2/32	0.276173	1	1.93798	2.49366	NCF4;SNX20
regulation of cellular carbohydrate catabolic process (GO:0043471)	2/6	0.0142892	0.414305	10.3359	43.9096	PPP1R3B;PGAM1		nuclear chromatin (GO:0000790)	6/254	0.831836	1	0.732467	0.134862	CENPT;TRRAP;TAL1;STAT3;TCF3;JUNB		amino acid transmembrane transporter activity (GO:0015171)	3/57	0.278821	1	1.63199	2.08435	SLC7A7;SLC1A4;SLC7A11
regulation of keratinocyte apoptotic process (GO:1902172)	2/6	0.0142892	0.411964	10.3359	43.9096	ZFP36;ZFP36L1		SCF ubiquitin ligase complex (GO:0019005)	1/55	0.8356	1	0.563777	0.101257	SPSB1		adenylate cyclase binding (GO:0008179)	1/10	0.279557	1	3.10078	3.95209	CAP1
negative regulation of erythrocyte differentiation (GO:0045647)	2/6	0.0142892	0.40965	10.3359	43.9096	ZFP36;ZFP36L1		cullin-RING ubiquitin ligase complex (GO:0031461)	4/182	0.842449	1	0.681489	0.116836	CDC20;SPSB1;CAND1;ZSWIM6		galactosyltransferase activity (GO:0008378)	1/10	0.279557	1	3.10078	3.95209	B4GALT3
positive regulation of fever generation (GO:0031622)	2/6	0.0142892	0.407361	10.3359	43.9096	IL1B;TNFRSF11A		caveola (GO:0005901)	1/57	0.846061	1	0.543996	0.0909361	F2R		protein kinase C activity (GO:0004697)	1/10	0.279557	1	3.10078	3.95209	CCL3
glomerulus vasculature development (GO:0072012)	2/6	0.0142892	0.405098	10.3359	43.9096	ANGPT2;PECAM1		nuclear body (GO:0016604)	16/619	0.849803	1	0.801493	0.130444	CENPT;BRD2;BNIP3L;CDKN1A;CIITA;CSTF2;TCF7;MKI67;SDCBP2;ADAMTS4;INCENP;NFKBIZ;TCF3;RAPGEF5;HSPA1B;HSPA1A		cytoskeletal adaptor activity (GO:0008093)	1/10	0.279557	1	3.10078	3.95209	SDCBP
positive regulation of fibroblast apoptotic process (GO:2000271)	2/6	0.0142892	0.40286	10.3359	43.9096	BCL2L11;BTG1		nuclear matrix (GO:0016363)	1/60	0.86052	1	0.516796	0.0776321	YEATS4		N-acetyllactosaminide beta-1,3-N-acetylglucosaminyltransferase activity (GO:0008532)	1/10	0.279557	1	3.10078	3.95209	B3GNT5
regulation of microtubule nucleation (GO:0010968)	2/6	0.0142892	0.400646	10.3359	43.9096	HSPA1B;HSPA1A		vacuole (GO:0005773)	1/63	0.873623	1	0.492187	0.0664976	RALB		dipeptidase activity (GO:0016805)	1/10	0.279557	1	3.10078	3.95209	DPEP2
positive regulation of actin filament bundle assembly (GO:0032233)	5/45	0.0144829	0.40386	3.44531	14.5901	PLEK;TPM1;SYNPO;ARHGEF5;CTGF		PML body (GO:0016605)	1/63	0.873623	1	0.492187	0.0664976	CIITA		oxidoreductase activity, oxidizing metal ions, NAD or NADP as acceptor (GO:0016723)	1/10	0.279557	1	3.10078	3.95209	STEAP2
glycosaminoglycan metabolic process (GO:0030203)	6/62	0.0146527	0.406373	3.00075	12.6726	EXT1;SDC4;BGN;GCNT2;SDC1;SGSH		polysome (GO:0005844)	1/64	0.877711	1	0.484496	0.0631965	VIM		vinculin binding (GO:0017166)	1/10	0.279557	1	3.10078	3.95209	ACTN1
regulation of tumor necrosis factor production (GO:0032680)	6/62	0.0146527	0.404176	3.00075	12.6726	ZFP36;ARG2;CCL3;MIF;CD14;HAVCR2		centrosome (GO:0005813)	11/462	0.883404	1	0.73828	0.0915267	PLK3;CCDC85B;CEP170;SLC1A4;BRCA2;RAPGEF6;NDRG1;HSPA1B;CTSC;CLASP1;HSPA1A		cyclin-dependent protein serine/threonine kinase inhibitor activity (GO:0004861)	1/10	0.279557	1	3.10078	3.95209	CDKN1A
regulation of keratinocyte differentiation (GO:0045616)	4/30	0.0150933	0.414093	4.13437	17.3375	ERRFI1;ZFP36;ZFP36L1;RUNX1		mitochondrial envelope (GO:0005740)	1/70	0.899613	1	0.442968	0.0468618	ADAP2		sugar:proton symporter activity (GO:0005351)	1/10	0.279557	1	3.10078	3.95209	SLC2A6
negative regulation of intrinsic apoptotic signaling pathway (GO:2001243)	6/63	0.0157673	0.43027	2.95312	12.2549	XBP1;PLAUR;ENO1;YBX3;MMP9;HSPA1A		integral component of endoplasmic reticulum membrane (GO:0030176)	2/129	0.923443	1	0.48074	0.0382891	EXT1;SLC37A1		serine-type peptidase activity (GO:0008236)	9/221	0.285039	1	1.26276	1.58492	C3;MMP12;MMP13;F10;MMP3;ADAM8;MMP9;CTSS;MMP10
cellular protein catabolic process (GO:0044257)	6/63	0.0157673	0.427982	2.95312	12.2549	BNIP3L;CASP8;TCIRG1;CTSS;CTSC;ADAMTS7		nuclear periphery (GO:0034399)	1/79	0.925344	1	0.392503	0.0304542	YEATS4		transition metal ion transmembrane transporter activity (GO:0046915)	2/33	0.28823	1	1.87926	2.33779	SLC11A1;ATP7A
regulation of T cell proliferation (GO:0042129)	6/63	0.0157673	0.425717	2.95312	12.2549	LGALS3;CEBPB;SDC4;ARG1;CD80;IL1B		mitotic spindle (GO:0072686)	1/85	0.938724	1	0.364797	0.0230675	CAPG		phosphatidylinositol-3,4,5-trisphosphate binding (GO:0005547)	2/33	0.28823	1	1.87926	2.33779	ADAP2;IQGAP1
negative regulation of immune effector process (GO:0002698)	3/17	0.0162011	0.435128	5.47196	22.5591	LGALS3;CD300A;HAVCR2		microtubule organizing center (GO:0005815)	11/508	0.940129	1	0.671428	0.0414526	PLK3;CCDC85B;CEP170;SLC1A4;BRCA2;RAPGEF6;NDRG1;HSPA1B;CTSC;CLASP1;HSPA1A		transcription factor activity, RNA polymerase II core promoter proximal region sequence-specific binding (GO:0000982)	11/281	0.298721	1	1.21383	1.4666	TGIF1;CEBPB;KLF6;STAT3;SOX11;ENO1;TCF3;LITAF;ETS2;FOSL2;NFKB2
negative regulation of antigen receptor-mediated signaling pathway (GO:0050858)	3/17	0.0162011	0.43285	5.47196	22.5591	LGALS3;CD300A;LILRB4		trans-Golgi network membrane (GO:0032588)	1/86	0.940708	1	0.360555	0.0220379	USP6NL		histone deacetylase binding (GO:0042826)	4/86	0.301193	1	1.44222	1.73067	TAL1;MIER1;HSPA1B;HSPA1A
positive regulation of lymphocyte migration (GO:2000403)	3/17	0.0162011	0.430595	5.47196	22.5591	CCL7;CCL4;CCL3		axon (GO:0030424)	2/142	0.946043	1	0.436729	0.0242241	CNTNAP2;IQGAP1		purine ribonucleoside triphosphate binding (GO:0035639)	15/397	0.301687	1	1.17158	1.40398	RALB;GCH1;ATP1A1;RHOC;RHOB;ZAP70;TUBB6;PFKL;AKT3;MYH8;ATP7A;HSPA1B;ARHGEF5;HSPA1A;MAP4K4
negative regulation of B cell activation (GO:0050869)	3/17	0.0162011	0.428364	5.47196	22.5591	CD300A;INHBA;FCGR2B		nucleoplasm part (GO:0044451)	8/408	0.954444	1	0.607995	0.0283485	CENPT;GTF2A1;CDKN1A;INCENP;CSTF2;TCF7;RAPGEF5;MKI67		tumor necrosis factor receptor binding (GO:0005164)	1/11	0.302803	1	2.81889	3.36765	TRAF1
positive regulation of hormone secretion (GO:0046887)	3/17	0.0162011	0.426156	5.47196	22.5591	C1QTNF3;EDN1;SOX11		nuclear chromosome, telomeric region (GO:0000784)	1/108	0.971275	1	0.287109	0.0083679	BRCA2		intramolecular oxidoreductase activity, transposing C=C bonds (GO:0016863)	1/11	0.302803	1	2.81889	3.36765	MIF
3'-UTR-mediated mRNA stabilization (GO:0070935)	3/17	0.0162011	0.423971	5.47196	22.5591	ZFP36;YBX3;MYD88		nuclear chromosome part (GO:0044454)	7/393	0.971779	1	0.552301	0.0158107	CENPT;TRRAP;TAL1;STAT3;TCF3;BRCA2;JUNB		ribosomal large subunit binding (GO:0043023)	1/11	0.302803	1	2.81889	3.36765	CPEB2
regulation of collagen biosynthetic process (GO:0032965)	3/17	0.0162011	0.421808	5.47196	22.5591	CIITA;F2R;VIM		chromosome, telomeric region (GO:0000781)	1/125	0.983601	1	0.248062	0.00410174	BRCA2		galanin receptor activity (GO:0004966)	1/11	0.302803	1	2.81889	3.36765	GPR84
positive regulation of macrophage activation (GO:0043032)	3/17	0.0162011	0.419666	5.47196	22.5591	IL33;TNIP2;THBS1		chromatin (GO:0000785)	4/297	0.987479	1	0.417613	0.00526211	TAL1;STAT3;TCF3;JUNB		intramolecular transferase activity, phosphotransferases (GO:0016868)	1/11	0.302803	1	2.81889	3.36765	PGAM1
macrophage activation (GO:0042116)	3/17	0.0162011	0.417547	5.47196	22.5591	CD93;SLC11A1;FPR2		cytosolic part (GO:0044445)	1/160	0.994835	1	0.193798	0.00100354	PFKL		intermediate filament binding (GO:0019215)	1/11	0.302803	1	2.81889	3.36765	VIM
positive chemotaxis (GO:0050918)	3/17	0.0162011	0.415449	5.47196	22.5591	LGALS3;FPR2;CORO1A		nucleolus (GO:0005730)	10/677	0.998725	1	0.458017	0.000584565	PLK3;CSTB;CDKN1A;KLF6;CDCA8;FLNA;MAGED2;CAPG;MKI67;SDCBP2		mitogen-activated protein kinase kinase kinase binding (GO:0031435)	1/11	0.302803	1	2.81889	3.36765	TCF3
positive regulation of leukocyte activation (GO:0002696)	3/17	0.0162011	0.413371	5.47196	22.5591	IL33;TNIP2;THBS1		dendrite (GO:0030425)	1/216	0.999188	1	0.143554	0.000116586	CNTNAP2		MAP kinase kinase kinase kinase activity (GO:0008349)	1/11	0.302803	1	2.81889	3.36765	MAP4K4
cellular response to glucocorticoid stimulus (GO:0071385)	3/17	0.0162011	0.411315	5.47196	22.5591	ZFP36;BCL2L11;ZFP36L1		mitochondrial matrix (GO:0005759)	1/309	0.99996	1	0.100349	4.02558e-06	ARG2		calcium-dependent protein serine/threonine kinase activity (GO:0009931)	1/11	0.302803	1	2.81889	3.36765	CCL3
regulation of protein insertion into mitochondrial membrane involved in apoptotic signaling pathway (GO:1900739)	4/31	0.0168981	0.426886	4.001	16.3263	CASP8;BCL2L11;BID;YWHAH		mitochondrial inner membrane (GO:0005743)	1/342	0.999984	1	0.0906659	1.42173e-06	LGALS3		complement receptor activity (GO:0004875)	1/11	0.302803	1	2.81889	3.36765	FPR2
positive regulation of protein insertion into mitochondrial membrane involved in apoptotic signaling pathway (GO:1900740)	4/31	0.0168981	0.424783	4.001	16.3263	CASP8;BCL2L11;BID;YWHAH		mitochondrion (GO:0005739)	11/1027	0.999994	1	0.332118	2.03478e-06	BNIP3L;ARG2;ANKRD37;BCL2L11;CASP8;CASP4;HS1BP3;DEGS1;BID;HSPA1B;HSPA1A		kinase inhibitor activity (GO:0019210)	3/60	0.30538	1	1.55039	1.83907	SOCS3;CDKN1A;BGN
regulation of blood coagulation (GO:0030193)	4/31	0.0168981	0.422701	4.001	16.3263	EDN1;F2R;THBS1;KNG1										protein tyrosine/serine/threonine phosphatase activity (GO:0008138)	2/35	0.312261	1	1.77187	2.06231	DUSP6;CDKN3
cartilage development (GO:0051216)	5/47	0.0172583	0.429606	3.2987	13.3909	CHI3L1;ATP7A;SULF1;CD44;RUNX1										carboxylic acid binding (GO:0031406)	2/35	0.312261	1	1.77187	2.06231	ASS1;CD44
aminoglycan biosynthetic process (GO:0006023)	5/47	0.0172583	0.427521	3.2987	13.3909	EXT1;SDC4;B3GNT5;GCNT2;SDC1										E-box binding (GO:0070888)	2/35	0.312261	1	1.77187	2.06231	TAL1;TCF3
positive regulation of I-kappaB kinase/NF-kappaB signaling (GO:0043123)	11/164	0.0175053	0.431543	2.07979	8.41327	CASP8;TNIP2;IL1B;F2R;MIER1;FLNA;BCL10;LTBR;RHOC;LITAF;MYD88										ubiquitin protein ligase binding (GO:0031625)	11/285	0.314544	1	1.19679	1.38425	CDKN1A;CASP8;RALB;CXCR4;BCL10;ARRB2;TRAF1;LTBR;TNFRSF1B;HSPA1B;HSPA1A
positive regulation of macromolecule biosynthetic process (GO:0010557)	10/143	0.0176302	0.432532	2.16837	8.75621	PIWIL2;XBP1;CIITA;EDN1;F2R;BCL3;PDGFB;CCL2;VIM;THBS1										manganese ion binding (GO:0030145)	2/36	0.324214	1	1.72265	1.94031	ARG2;ARG1
positive regulation of macromolecule metabolic process (GO:0010604)	16/277	0.0182277	0.445052	1.79106	7.17287	PTPN1;SLC11A1;STAT3;PDGFB;SOX11;INHBA;ARRB2;PRKAB1;ACTG2;INPP5F;ID2;IL1B;CCL3;HSPA1B;MYD88;HSPA1A										arylsulfatase activity (GO:0004065)	1/12	0.3253	1	2.58398	2.90183	SULF1
positive regulation of phosphorylation (GO:0042327)	13/209	0.0183782	0.446589	1.92871	7.70828	RALB;PLAUR;MIF;BCL10;FPR2;MMP9;THBS1;C3;SDCBP;IL1B;ITGA6;CARD14;EPHB4										Ral GTPase binding (GO:0017160)	1/12	0.3253	1	2.58398	2.90183	FLNA
positive regulation of tumor necrosis factor production (GO:0032760)	5/48	0.0187693	0.453933	3.22997	12.8409	CCL3;CD14;MIF;THBS1;HAVCR2										ATPase-coupled anion transmembrane transporter activity (GO:0043225)	1/12	0.3253	1	2.58398	2.90183	ABCC3
regulation of protein tyrosine kinase activity (GO:0061097)	4/32	0.0188321	0.453303	3.87597	15.3961	PTPN1;DLG3;MVP;PDGFB										sodium ion binding (GO:0031402)	1/12	0.3253	1	2.58398	2.90183	ATP1A1
glycosphingolipid biosynthetic process (GO:0006688)	3/18	0.0189841	0.454817	5.16796	20.4866	UGCG;ST8SIA4;B4GALNT1										UDP-galactose:beta-N-acetylglucosamine beta-1,3-galactosyltransferase activity (GO:0008499)	1/12	0.3253	1	2.58398	2.90183	B3GNT5
negative regulation of apoptotic signaling pathway (GO:2001234)	6/66	0.0194599	0.464038	2.81889	11.1047	LGALS3;PLAUR;ITGA6;MMP9;THBS1;HSPA1A										basic amino acid transmembrane transporter activity (GO:0015174)	1/12	0.3253	1	2.58398	2.90183	SLC7A7
ATP hydrolysis coupled proton transport (GO:0015991)	2/7	0.0195807	0.464746	8.85936	34.8457	ATP6V1H;ATP1A1										peptidase inhibitor activity (GO:0030414)	2/37	0.336114	1	1.67609	1.82746	CSTB;KNG1
ATP hydrolysis coupled cation transmembrane transport (GO:0099132)	2/7	0.0195807	0.462594	8.85936	34.8457	ATP6V1H;ATP1A1										endopeptidase regulator activity (GO:0061135)	2/37	0.336114	1	1.67609	1.82746	CSTB;KNG1
regulation of monocyte chemotactic protein-1 production (GO:0071637)	2/7	0.0195807	0.460462	8.85936	34.8457	C1QTNF3;IL1B										small GTPase binding (GO:0031267)	3/64	0.340916	1	1.45349	1.56413	ADAP2;FLNA;RAPGEF6
positive regulation of apoptotic cell clearance (GO:2000427)	2/7	0.0195807	0.45835	8.85936	34.8457	C3;CCL2										transcription coactivator activity (GO:0003713)	11/292	0.342679	1	1.1681	1.25099	NFE2;GTF2A1;CIITA;ACTN1;FHL2;SOX11;BCL10;TCF3;JUNB;FAM129B;NFKB2
release of sequestered calcium ion into cytosol by endoplasmic reticulum (GO:1903514)	2/7	0.0195807	0.456257	8.85936	34.8457	CCL3;CCR5										GTP binding (GO:0005525)	6/148	0.343434	1	1.25707	1.34351	TUBB6;RALB;GCH1;RHOC;ARHGEF5;RHOB
wound healing, spreading of epidermal cells (GO:0035313)	2/7	0.0195807	0.454183	8.85936	34.8457	MMP12;ITGA5										carbohydrate kinase activity (GO:0019200)	1/13	0.347072	1	2.38521	2.52409	HK3
vascular smooth muscle contraction (GO:0014829)	2/7	0.0195807	0.452128	8.85936	34.8457	EDNRA;EDN1										microtubule plus-end binding (GO:0051010)	1/13	0.347072	1	2.38521	2.52409	CLASP1
regulation of relaxation of muscle (GO:1901077)	2/7	0.0195807	0.450092	8.85936	34.8457	SLN;SRI										ionotropic glutamate receptor binding (GO:0035255)	1/13	0.347072	1	2.38521	2.52409	DLG3
negative regulation of calcium ion transmembrane transporter activity (GO:1901020)	4/33	0.0208977	0.47821	3.75852	14.5384	SLN;GPR35;SRI;ADRA2A										fucosyltransferase activity (GO:0008417)	1/13	0.347072	1	2.38521	2.52409	FUT4
positive regulation of tumor necrosis factor superfamily cytokine production (GO:1903557)	4/33	0.0208977	0.476075	3.75852	14.5384	CCL3;ADAM8;CD14;MIF										insulin-like growth factor I binding (GO:0031994)	1/13	0.347072	1	2.38521	2.52409	ITGA6
phagosome maturation (GO:0090382)	4/33	0.0208977	0.473959	3.75852	14.5384	ATP6V1A;ATP6V1H;TCIRG1;CORO1A										organic acid:sodium symporter activity (GO:0005343)	1/13	0.347072	1	2.38521	2.52409	SLC10A4
endodermal cell differentiation (GO:0035987)	4/33	0.0208977	0.471862	3.75852	14.5384	COL12A1;INHBA;ITGA5;MMP9										guanylate kinase activity (GO:0004385)	1/13	0.347072	1	2.38521	2.52409	DLG3
positive regulation of T cell differentiation (GO:0045582)	4/33	0.0208977	0.469783	3.75852	14.5384	ZAP70;XBP1;ADAM8;LILRB4										metal ion binding (GO:0046872)	16/443	0.35721	1	1.11992	1.15288	CSGALNACT1;TPD52;TPM4;IQGAP1;SRI;THBS1;HSP90B1;MMP12;SELP;MMP13;SELL;ADPRH;ADAM8;LCP1;S100A9;S100A8
aminoglycan catabolic process (GO:0006026)	4/33	0.0208977	0.467723	3.75852	14.5384	SDC4;SDC1;CHI3L1;SGSH										ubiquitin-like protein ligase binding (GO:0044389)	11/298	0.36714	1	1.14458	1.14688	CDKN1A;CASP8;RALB;CXCR4;BCL10;ARRB2;TRAF1;LTBR;TNFRSF1B;HSPA1B;HSPA1A
regulation of peptidyl-tyrosine phosphorylation (GO:0050730)	7/86	0.0210355	0.468751	2.52389	9.7461	IL11;CD80;PDGFB;OSM;MIF;ITGA5;CD44										insulin-like growth factor binding (GO:0005520)	1/14	0.368143	1	2.21484	2.21326	ITGA6
cellular polysaccharide biosynthetic process (GO:0033692)	3/19	0.0220145	0.488434	4.89596	18.6833	CSGALNACT1;EXT1;B3GNT5										peptide transmembrane transporter activity (GO:1904680)	1/14	0.368143	1	2.21484	2.21326	SLC15A3
cellular response to interleukin-7 (GO:0098761)	3/19	0.0220145	0.486319	4.89596	18.6833	STAT3;IL2RG;IL7R										beta-1,3-galactosyltransferase activity (GO:0048531)	1/14	0.368143	1	2.21484	2.21326	B3GNT5
regulation of platelet activation (GO:0010543)	3/19	0.0220145	0.484223	4.89596	18.6833	SELP;PLEK;PDGFB										Rac guanyl-nucleotide exchange factor activity (GO:0030676)	1/14	0.368143	1	2.21484	2.21326	SPATA13
interleukin-7-mediated signaling pathway (GO:0038111)	3/19	0.0220145	0.482145	4.89596	18.6833	STAT3;IL2RG;IL7R										aldehyde dehydrogenase (NAD) activity (GO:0004029)	1/14	0.368143	1	2.21484	2.21326	ALDH1A2
negative regulation of calcium ion transport (GO:0051926)	3/19	0.0220145	0.480084	4.89596	18.6833	SLN;STC1;ADRA2A										hydrolase activity, hydrolyzing N-glycosyl compounds (GO:0016799)	1/14	0.368143	1	2.21484	2.21326	ADPRH
hexose transmembrane transport (GO:0035428)	3/19	0.0220145	0.478041	4.89596	18.6833	EDNRA;SLC2A1;SLC2A6										L-glutamate transmembrane transporter activity (GO:0005313)	1/14	0.368143	1	2.21484	2.21326	SLC7A11
positive regulation of nucleic acid-templated transcription (GO:1903508)	25/503	0.0221973	0.47997	1.54114	5.86833	CIITA;CD80;PDGFB;FHL2;YEATS4;BCL10;BRCA2;ETS2;FAM129B;SPP1;YWHAH;NFE2;BRPF1;STAT3;F2R;SOX11;INHBA;RUNX1;KLF6;TAL1;ID2;IL1B;MTF2;BCL3;TCF3										nucleoside kinase activity (GO:0019206)	1/14	0.368143	1	2.21484	2.21326	UCK2
intracellular pH reduction (GO:0051452)	4/34	0.0230969	0.497313	3.64797	13.7458	ATP6V1A;SLC11A1;ATP6V1H;TCIRG1										receptor tyrosine kinase binding (GO:0030971)	2/40	0.371398	1	1.55039	1.53563	PTPN1;ANGPT2
positive regulation of cytokine-mediated signaling pathway (GO:0001961)	4/34	0.0230969	0.495224	3.64797	13.7458	EDN1;CASP4;HSPA1B;HSPA1A										protein kinase inhibitor activity (GO:0004860)	3/68	0.376316	1	1.36799	1.33697	SOCS3;CDKN1A;BGN
positive regulation of intrinsic apoptotic signaling pathway (GO:2001244)	4/34	0.0230969	0.493152	3.64797	13.7458	BCL2L11;BID;S100A9;S100A8										MHC class I protein binding (GO:0042288)	1/15	0.388534	1	2.06718	1.95426	PILRA
mRNA stabilization (GO:0048255)	4/34	0.0230969	0.491097	3.64797	13.7458	ZFP36;SLC11A1;YBX3;MYD88										ribosomal small subunit binding (GO:0043024)	1/15	0.388534	1	2.06718	1.95426	CPEB2
carboxylic acid metabolic process (GO:0019752)	4/34	0.0230969	0.489059	3.64797	13.7458	CSGALNACT1;GSTO2;SLC2A1;MIF										transmembrane receptor protein tyrosine phosphatase activity (GO:0005001)	1/15	0.388534	1	2.06718	1.95426	PTPRE
positive regulation of cellular component biogenesis (GO:0044089)	7/88	0.02354	0.496382	2.46653	9.24714	SDCBP;SRPX2;SDC4;TAL1;PLEK;SDC1;SYNPO										transmembrane receptor protein phosphatase activity (GO:0019198)	1/15	0.388534	1	2.06718	1.95426	PTPRE
regulation of MAP kinase activity (GO:0043405)	7/88	0.02354	0.494339	2.46653	9.24714	PTPN1;EDN1;CD300A;IL1B;PDGFB;ADAM8;ADRA2A										insulin-like growth factor receptor binding (GO:0005159)	1/15	0.388534	1	2.06718	1.95426	YWHAH
negative regulation of cysteine-type endopeptidase activity involved in apoptotic process (GO:0043154)	6/69	0.0237014	0.49569	2.69633	10.0902	PLAUR;BIRC5;TNFRSF1B;MMP9;THBS1;CD44										copper ion binding (GO:0005507)	2/42	0.394501	1	1.47656	1.3734	MOXD1;ATP7A
blood circulation (GO:0008015)	5/51	0.0238155	0.496043	3.03998	11.3617	PROKR1;NFE2;SERPING1;ADM;AVPR1A										oxidoreductase activity, acting on paired donors, with incorporation or reduction of molecular oxygen, NAD(P)H as one donor, and incorporation of one atom of oxygen (GO:0016709)	2/42	0.394501	1	1.47656	1.3734	SQLE;FMO3
positive regulation of cell differentiation (GO:0045597)	12/195	0.0246464	0.511263	1.90817	7.06619	SDCBP;IFITM1;XBP1;ZFP36;CEBPB;IL1B;GCNT2;SOX11;TCF3;JUNB;CTGF;ZFP36L1										hydrolase activity, acting on acid anhydrides, catalyzing transmembrane movement of substances (GO:0016820)	2/43	0.405907	1	1.44222	1.30035	ABCC3;ABCA3
cellular response to interleukin-1 (GO:0071347)	10/151	0.0246931	0.510158	2.05349	7.60045	IL1RN;CCL7;IRAK2;TNIP2;IL1B;CCL4;CCL3;CCL2;MYD88;ADAMTS7										sulfuric ester hydrolase activity (GO:0008484)	1/16	0.408269	1	1.93798	1.7361	SULF1
vacuolar acidification (GO:0007035)	3/20	0.0252925	0.520433	4.65116	17.1035	SLC11A1;ATP6V1H;TCIRG1										adrenergic receptor activity (GO:0004935)	1/16	0.408269	1	1.93798	1.7361	ADRA2A
positive regulation of interleukin-2 production (GO:0032743)	3/20	0.0252925	0.518343	4.65116	17.1035	CD80;IL1B;RUNX1										core promoter proximal region sequence-specific DNA binding (GO:0000987)	10/279	0.412242	1	1.11139	0.98485	TGIF1;NFE2;KLF6;STAT3;TCF3;JUNB;LITAF;ETS2;FOSL2;NFKB2
regulation of endoplasmic reticulum stress-induced intrinsic apoptotic signaling pathway (GO:1902235)	3/20	0.0252925	0.51627	4.65116	17.1035	XBP1;BCL2L11;HSPA1A										purine ribonucleoside binding (GO:0032550)	6/160	0.412627	1	1.16279	1.02931	TUBB6;RALB;GCH1;RHOC;ARHGEF5;RHOB
negative regulation of phosphate metabolic process (GO:0045936)	3/20	0.0252925	0.514213	4.65116	17.1035	CDKN1A;PLEK;INHBA										Rac GTPase binding (GO:0048365)	2/44	0.417208	1	1.40944	1.23209	FLNA;SRGAP3
heparan sulfate proteoglycan metabolic process (GO:0030201)	3/20	0.0252925	0.512172	4.65116	17.1035	EXT1;SULF1;SGSH										RNA polymerase II regulatory region sequence-specific DNA binding (GO:0000977)	16/461	0.417873	1	1.07619	0.93906	TGIF1;CEBPB;XBP1;STAT3;SOX11;ENO1;LITAF;ETS2;FOSL2;NFKB2;RUNX1;KLF6;SALL2;TAL1;TCF3;JUNB
regulation of fibroblast growth factor receptor signaling pathway (GO:0040036)	3/20	0.0252925	0.510148	4.65116	17.1035	SULF1;THBS1;DUSP6										phosphatidic acid binding (GO:0070300)	1/17	0.427367	1	1.82399	1.55059	RAPGEF6
chondroitin sulfate biosynthetic process (GO:0030206)	3/20	0.0252925	0.508139	4.65116	17.1035	CSGALNACT1;CHST11;BGN										organic acid transmembrane transporter activity (GO:0005342)	1/17	0.427367	1	1.82399	1.55059	SLC10A4
positive regulation of leukocyte migration (GO:0002687)	4/35	0.0254314	0.508928	3.54374	13.0118	LGALS3;CXCL1;ADAM8;CXCL2										antiporter activity (GO:0015297)	1/17	0.427367	1	1.82399	1.55059	SLC7A7
positive regulation of exocytosis (GO:0045921)	4/35	0.0254314	0.50694	3.54374	13.0118	SDCBP;SDC4;SDC1;CLASP1										CoA hydrolase activity (GO:0016289)	1/17	0.427367	1	1.82399	1.55059	ACOT1
bone development (GO:0060348)	4/35	0.0254314	0.504967	3.54374	13.0118	MMP13;STC1;SULF1;IFITM5										GTP-Rho binding (GO:0017049)	1/17	0.427367	1	1.82399	1.55059	CDC42EP4
regulation of insulin receptor signaling pathway (GO:0046626)	4/35	0.0254314	0.50301	3.54374	13.0118	SOCS3;PTPN1;PTPRE;IL1B										ephrin receptor activity (GO:0005003)	1/17	0.427367	1	1.82399	1.55059	EPHB4
regulation of vascular associated smooth muscle cell migration (GO:1904752)	2/8	0.0255556	0.503515	7.75194	28.4256	TPM1;PDGFB										H4 histone acetyltransferase activity (GO:0010485)	1/17	0.427367	1	1.82399	1.55059	BRCA2
positive regulation of cell aging (GO:0090343)	2/8	0.0255556	0.501578	7.75194	28.4256	ARG2;LMNA										retinol dehydrogenase activity (GO:0004745)	1/17	0.427367	1	1.82399	1.55059	RDH12
regulation of fibroblast apoptotic process (GO:2000269)	2/8	0.0255556	0.499657	7.75194	28.4256	BCL2L11;BTG1										receptor antagonist activity (GO:0048019)	1/17	0.427367	1	1.82399	1.55059	IL1RN
defense response to protozoan (GO:0042832)	2/8	0.0255556	0.497749	7.75194	28.4256	CLEC7A;SLC11A1										low-density lipoprotein particle binding (GO:0030169)	1/17	0.427367	1	1.82399	1.55059	THBS1
cellular response to interleukin-21 (GO:0098757)	2/8	0.0255556	0.495857	7.75194	28.4256	STAT3;IL2RG										transmembrane-ephrin receptor activity (GO:0005005)	1/17	0.427367	1	1.82399	1.55059	EPHB4
negative regulation of leukocyte mediated cytotoxicity (GO:0001911)	2/8	0.0255556	0.493979	7.75194	28.4256	ARRB2;FCGR2B										acyl-CoA hydrolase activity (GO:0047617)	1/17	0.427367	1	1.82399	1.55059	ACOT1
microvillus organization (GO:0032528)	2/8	0.0255556	0.492115	7.75194	28.4256	FXYD5;RAPGEF6										single-stranded RNA binding (GO:0003727)	2/46	0.439477	1	1.34816	1.10842	ZFP36;MEX3A
nuclear-transcribed mRNA catabolic process, deadenylation-independent decay (GO:0031086)	2/8	0.0255556	0.490265	7.75194	28.4256	ZFP36;ZFP36L1										hydro-lyase activity (GO:0016836)	2/46	0.439477	1	1.34816	1.10842	ENO1;ENO2
interleukin-21-mediated signaling pathway (GO:0038114)	2/8	0.0255556	0.488428	7.75194	28.4256	STAT3;IL2RG										ATPase activity, coupled to transmembrane movement of substances (GO:0042626)	2/46	0.439477	1	1.34816	1.10842	ABCC3;ABCA3
microvillus assembly (GO:0030033)	2/8	0.0255556	0.486606	7.75194	28.4256	FXYD5;RAPGEF6										P-P-bond-hydrolysis-driven transmembrane transporter activity (GO:0015405)	2/46	0.439477	1	1.34816	1.10842	ABCC3;ABCA3
desensitization of G-protein coupled receptor protein signaling pathway (GO:0002029)	2/8	0.0255556	0.484797	7.75194	28.4256	ADM;ARRB2										ATP binding (GO:0005524)	9/256	0.443916	1	1.09012	0.885305	ZAP70;PFKL;AKT3;MYH8;ATP1A1;ATP7A;HSPA1B;MAP4K4;HSPA1A
negative regulation of calcium ion transmembrane transport (GO:1903170)	2/8	0.0255556	0.483001	7.75194	28.4256	SLN;ADRA2A										microfilament motor activity (GO:0000146)	1/18	0.445851	1	1.72265	1.39151	MYH8
membrane fusion involved in viral entry into host cell (GO:0039663)	2/8	0.0255556	0.481219	7.75194	28.4256	CXCR4;CCR5										Ran GTPase binding (GO:0008536)	1/18	0.445851	1	1.72265	1.39151	BIRC5
positive regulation of interleukin-2 biosynthetic process (GO:0045086)	2/8	0.0255556	0.47945	7.75194	28.4256	IL1B;CD80										hyaluronic acid binding (GO:0005540)	1/18	0.445851	1	1.72265	1.39151	CD44
regulation of sensory perception (GO:0051931)	2/8	0.0255556	0.477694	7.75194	28.4256	F2R;CCL3										calcium-activated potassium channel activity (GO:0015269)	1/18	0.445851	1	1.72265	1.39151	KCNN4
regulation of MHC class II biosynthetic process (GO:0045346)	2/8	0.0255556	0.47595	7.75194	28.4256	XBP1;CIITA										lysine-acetylated histone binding (GO:0070577)	1/18	0.445851	1	1.72265	1.39151	BRD2
actin filament network formation (GO:0051639)	2/8	0.0255556	0.47422	7.75194	28.4256	ACTN1;LCP1										transcriptional repressor activity, RNA polymerase II transcription factor binding (GO:0001191)	2/48	0.461271	1	1.29199	0.999701	ID2;HSPA1A
fusion of virus membrane with host plasma membrane (GO:0019064)	2/8	0.0255556	0.472501	7.75194	28.4256	CXCR4;CCR5										RNA polymerase binding (GO:0070063)	1/19	0.463738	1	1.63199	1.25408	ZFP36
norepinephrine metabolic process (GO:0042415)	2/8	0.0255556	0.470796	7.75194	28.4256	MOXD1;ATP7A										transforming growth factor beta binding (GO:0050431)	1/19	0.463738	1	1.63199	1.25408	THBS1
copper ion import (GO:0015677)	2/8	0.0255556	0.469102	7.75194	28.4256	ATP7A;STEAP2										ephrin receptor binding (GO:0046875)	1/19	0.463738	1	1.63199	1.25408	PTPN1
arginine catabolic process (GO:0006527)	2/8	0.0255556	0.467421	7.75194	28.4256	ARG2;ARG1										acetylation-dependent protein binding (GO:0140033)	1/19	0.463738	1	1.63199	1.25408	BRD2
regulation of apoptotic cell clearance (GO:2000425)	2/8	0.0255556	0.465751	7.75194	28.4256	C3;CCL2										protein tyrosine kinase binding (GO:1990782)	2/49	0.471981	1	1.26562	0.95025	PTPN1;ANGPT2
calcium-mediated signaling (GO:0019722)	6/71	0.0268488	0.487579	2.62037	9.47929	SELP;EDN1;CCL3;CXCR4;FPR2;CCR5										guanyl ribonucleotide binding (GO:0032561)	6/171	0.475408	1	1.08799	0.80901	TUBB6;RALB;GCH1;RHOC;ARHGEF5;RHOB
positive regulation of gene expression (GO:0010628)	35/772	0.0274008	0.495838	1.40579	5.05689	PIWIL2;CIITA;CD80;PDGFB;FHL2;YEATS4;BCL10;BRCA2;THBS1;ETS2;ACTG2;FAM129B;SPP1;CCL3;YWHAH;NFE2;BRPF1;SLC11A1;STAT3;F2R;SOX11;INHBA;PRKAB1;RUNX1;KLF6;TAL1;IL1B;ID2;MTF2;BCL3;VIM;TCF3;HSPA1B;MYD88;HSPA1A										RNA polymerase II core promoter proximal region sequence-specific DNA binding (GO:0000978)	9/263	0.475882	1	1.0611	0.787958	TGIF1;KLF6;STAT3;TCF3;JUNB;LITAF;ETS2;FOSL2;NFKB2
regulation of cytokine-mediated signaling pathway (GO:0001959)	7/91	0.02767	0.498939	2.38521	8.55673	IFNAR2;SOCS3;PTPN1;CASP8;IRAK2;TRAF1;RUNX1										RNA polymerase II regulatory region DNA binding (GO:0001012)	7/202	0.477472	1	1.07453	0.794342	XBP1;CEBPB;SALL2;TAL1;ENO1;RUNX1;FOSL2
positive regulation of response to external stimulus (GO:0032103)	7/91	0.02767	0.497182	2.38521	8.55673	IL33;CCL4;PDGFB;CCL3;S100A9;THBS1;S100A8										intramolecular oxidoreductase activity, transposing S-S bonds (GO:0016864)	1/20	0.481049	1	1.55039	1.13455	P4HB
carbohydrate catabolic process (GO:0016052)	4/36	0.0279029	0.499609	3.44531	12.3308	HK3;PFKL;PGAM1;ENO2										protein disulfide isomerase activity (GO:0003756)	1/20	0.481049	1	1.55039	1.13455	P4HB
actin filament bundle organization (GO:0061572)	4/36	0.0279029	0.497862	3.44531	12.3308	NEDD9;LCP1;RHOC;RHOB										protein phosphatase 2A binding (GO:0051721)	1/20	0.481049	1	1.55039	1.13455	CTTNBP2NL
negative regulation of ion transmembrane transporter activity (GO:0032413)	3/21	0.0288176	0.512392	4.42968	15.711	SLN;MMP9;ADRA2A										glutamate receptor binding (GO:0035254)	1/20	0.481049	1	1.55039	1.13455	DLG3
dopamine metabolic process (GO:0042417)	3/21	0.0288176	0.510613	4.42968	15.711	MOXD1;GCH1;ATP7A										low-density lipoprotein particle receptor binding (GO:0050750)	1/20	0.481049	1	1.55039	1.13455	HSP90B1
negative regulation of cytokine biosynthetic process (GO:0042036)	3/21	0.0288176	0.508846	4.42968	15.711	ZFP36;BCL3;INHBA										alcohol dehydrogenase (NADP+) activity (GO:0008106)	1/20	0.481049	1	1.55039	1.13455	RDH12
positive regulation of cytosolic calcium ion concentration (GO:0007204)	9/134	0.029693	0.522495	2.08261	7.32421	EDNRA;EDN1;GPR35;F2R;SAA1;CXCR4;FPR2;CCR5;KNG1										mitogen-activated protein kinase binding (GO:0051019)	1/20	0.481049	1	1.55039	1.13455	GCH1
cellular response to organic substance (GO:0071310)	9/134	0.029693	0.5207	2.08261	7.32421	IL1B;STAT3;PDGFB;CCL3;CXCR4;CCL2;AVPR1A;JUNB;ADRA2A										endopeptidase inhibitor activity (GO:0004866)	4/112	0.489807	1	1.10742	0.790414	CSTB;SERPING1;BIRC5;KNG1
regulation of angiogenesis (GO:0045765)	11/178	0.0298132	0.521016	1.91621	6.73127	XBP1;BTG1;IL1B;CHI3L1;ANGPTL4;SULF1;THBS1;PGF;RUNX1;RHOB;FAM129B										anion:anion antiporter activity (GO:0015301)	1/21	0.497802	1	1.47656	1.02998	SLC7A11
Rho protein signal transduction (GO:0007266)	6/73	0.0302614	0.527043	2.54858	8.91464	CDC42EP4;ARHGAP29;TAX1BP3;RHOC;ADRA2A;RHOB										scavenger receptor activity (GO:0005044)	1/21	0.497802	1	1.47656	1.02998	CXCL16
positive regulation of signaling (GO:0023056)	4/37	0.0305125	0.529609	3.35219	11.6979	EDN1;INPP5F;CD80;SOX11										calcium-dependent cysteine-type endopeptidase activity (GO:0004198)	1/21	0.497802	1	1.47656	1.02998	SRI
endoderm formation (GO:0001706)	4/37	0.0305125	0.527814	3.35219	11.6979	COL12A1;INHBA;ITGA5;MMP9										polypeptide N-acetylgalactosaminyltransferase activity (GO:0004653)	1/21	0.497802	1	1.47656	1.02998	GALNT10
negative regulation of blood coagulation (GO:0030195)	4/37	0.0305125	0.526031	3.35219	11.6979	EDN1;PDGFB;PLAUR;KNG1										G-protein coupled receptor activity (GO:0004930)	9/268	0.498473	1	1.04131	0.724963	PROKR1;GPR35;GPR171;PTAFR;F2R;CXCR4;FPR2;AVPR1A;GPR84
positive regulation of cellular metabolic process (GO:0031325)	7/93	0.030681	0.527155	2.33392	8.13163	CDKN1A;EDN1;INPP5F;PDGFB;ARRB2;INHBA;THBS1										Rab guanyl-nucleotide exchange factor activity (GO:0017112)	2/52	0.503324	1	1.19261	0.81875	ST5;RIN1
regulation of cell growth (GO:0001558)	12/202	0.0312199	0.534615	1.84204	6.38581	SDCBP;CDKN1A;BTG1;CCDC85B;ENO1;INHBA;S100A9;HSPA1B;SIPA1;S100A8;HSPA1A;CXCL16										hormone activity (GO:0005179)	3/84	0.511772	1	1.10742	0.741835	EDN1;INHBA;METRNL
B cell activation (GO:0042113)	6/74	0.0320692	0.547322	2.51414	8.64829	TPD52;IL11;ZAP70;KLF6;CASP8;TCF3										bHLH transcription factor binding (GO:0043425)	1/22	0.514015	1	1.40944	0.93799	TCF3
secretory granule organization (GO:0033363)	2/9	0.0321645	0.547118	6.89061	23.6823	SRGN;F2R										core promoter proximal region DNA binding (GO:0001159)	1/22	0.514015	1	1.40944	0.93799	NFE2
negative regulation of phagocytosis (GO:0050765)	2/9	0.0321645	0.5453	6.89061	23.6823	CD300A;FCGR2B										repressing transcription factor binding (GO:0070491)	2/54	0.523539	1	1.14844	0.743202	STAT3;TCF3
ornithine metabolic process (GO:0006591)	2/9	0.0321645	0.543495	6.89061	23.6823	ARG2;ARG1										disordered domain specific binding (GO:0097718)	1/23	0.529705	1	1.34816	0.856671	HSPA1A
megakaryocyte differentiation (GO:0030219)	2/9	0.0321645	0.541701	6.89061	23.6823	IL11;TAL1										nucleotide kinase activity (GO:0019201)	1/23	0.529705	1	1.34816	0.856671	DLG3
ATF6-mediated unfolded protein response (GO:0036500)	2/9	0.0321645	0.539919	6.89061	23.6823	XBP1;HSP90B1										endoribonuclease activity (GO:0004521)	1/23	0.529705	1	1.34816	0.856671	PIWIL2
regulation of organ growth (GO:0046620)	2/9	0.0321645	0.538149	6.89061	23.6823	WWC2;DUSP6										lipoprotein particle binding (GO:0071813)	1/23	0.529705	1	1.34816	0.856671	THBS1
actin crosslink formation (GO:0051764)	2/9	0.0321645	0.53639	6.89061	23.6823	FLNA;LCP1										ATPase activator activity (GO:0001671)	1/23	0.529705	1	1.34816	0.856671	ATP1B3
cellular response to interleukin-4 (GO:0071353)	2/9	0.0321645	0.534643	6.89061	23.6823	XBP1;TCF7										fibroblast growth factor binding (GO:0017134)	1/23	0.529705	1	1.34816	0.856671	THBS1
negative regulation of pri-miRNA transcription from RNA polymerase II promoter (GO:1902894)	2/9	0.0321645	0.532907	6.89061	23.6823	PDGFB;LILRB4										calcium activated cation channel activity (GO:0005227)	1/23	0.529705	1	1.34816	0.856671	KCNN4
positive regulation of coagulation (GO:0050820)	2/9	0.0321645	0.531182	6.89061	23.6823	F2R;THBS1										protein kinase activator activity (GO:0030295)	2/56	0.543194	1	1.10742	0.675846	CDKN1A;IQGAP1
regulation of cysteine-type endopeptidase activity involved in apoptotic signaling pathway (GO:2001267)	2/9	0.0321645	0.529469	6.89061	23.6823	PLAUR;MMP9										adenyl ribonucleotide binding (GO:0032559)	9/280	0.551453	1	0.996678	0.593221	ZAP70;PFKL;AKT3;MYH8;ATP1A1;ATP7A;HSPA1B;MAP4K4;HSPA1A
negative regulation of tyrosine phosphorylation of STAT protein (GO:0042532)	2/9	0.0321645	0.527767	6.89061	23.6823	SOCS3;INPP5F										ATPase activity, coupled to movement of substances (GO:0043492)	2/57	0.552808	1	1.08799	0.644902	ABCC3;ABCA3
regulation of sensory perception of pain (GO:0051930)	2/9	0.0321645	0.526075	6.89061	23.6823	F2R;CCL3										retinoid binding (GO:0005501)	1/25	0.559584	1	1.24031	0.720076	ALDH1A2
L-ascorbic acid metabolic process (GO:0019852)	2/9	0.0321645	0.524394	6.89061	23.6823	GSTO2;SLC2A1										disulfide oxidoreductase activity (GO:0015036)	1/25	0.559584	1	1.24031	0.720076	P4HB
interleukin-23-mediated signaling pathway (GO:0038155)	2/9	0.0321645	0.522724	6.89061	23.6823	STAT3;P4HB										miRNA binding (GO:0035198)	1/25	0.559584	1	1.24031	0.720076	MATR3
positive regulation of cell activation (GO:0050867)	2/9	0.0321645	0.521065	6.89061	23.6823	SELP;PLEK										NF-kappaB binding (GO:0051059)	1/25	0.559584	1	1.24031	0.720076	BCL10
positive regulation of hemostasis (GO:1900048)	2/9	0.0321645	0.519416	6.89061	23.6823	F2R;THBS1										kinase activator activity (GO:0019209)	1/25	0.559584	1	1.24031	0.720076	BCL10
basement membrane organization (GO:0071711)	2/9	0.0321645	0.517777	6.89061	23.6823	COL4A1;CTSS										cysteine-type endopeptidase inhibitor activity involved in apoptotic process (GO:0043027)	1/25	0.559584	1	1.24031	0.720076	TNFSF14
negative regulation of vascular endothelial growth factor receptor signaling pathway (GO:0030948)	2/9	0.0321645	0.516149	6.89061	23.6823	PTPN1;FAM129B										neutral amino acid transmembrane transporter activity (GO:0015175)	1/25	0.559584	1	1.24031	0.720076	SLC1A4
toll-like receptor 3 signaling pathway (GO:0034138)	2/9	0.0321645	0.514531	6.89061	23.6823	CASP8;TNIP2										lipoprotein particle receptor binding (GO:0070325)	1/26	0.573805	1	1.19261	0.662451	HSP90B1
response to interleukin-4 (GO:0070670)	2/9	0.0321645	0.512923	6.89061	23.6823	XBP1;TCF7										metal ion transmembrane transporter activity (GO:0046873)	1/26	0.573805	1	1.19261	0.662451	SLC11A1
regulation of oxidative stress-induced cell death (GO:1903201)	2/9	0.0321645	0.511325	6.89061	23.6823	MMP3;P4HB										double-stranded RNA binding (GO:0003725)	2/60	0.580783	1	1.03359	0.561632	ACTN1;VIM
activation of phospholipase C activity (GO:0007202)	3/22	0.0325887	0.51646	4.22833	14.4769	EDNRA;AVPR1A;RASGRP4										GTPase activity (GO:0003924)	7/223	0.582238	1	0.973338	0.526454	ARL4C;RALB;GCH1;GNG8;RHOC;GSPT2;RHOB
STAT cascade (GO:0097696)	3/22	0.0325887	0.514861	4.22833	14.4769	IFNAR2;STAT3;CCL2										tubulin binding (GO:0015631)	8/256	0.586025	1	0.968992	0.517822	ARL4C;BCL2L11;BIRC5;BRCA2;S100A9;NDRG1;S100A8;CLASP1
glucose transport (GO:0015758)	3/22	0.0325887	0.513272	4.22833	14.4769	EDNRA;SLC2A1;SLC2A6										calcium channel regulator activity (GO:0005246)	1/27	0.587568	1	1.14844	0.610696	SRI
positive regulation of mitochondrial outer membrane permeabilization involved in apoptotic signaling pathway (GO:1901030)	4/38	0.0332611	0.522251	3.26397	11.1085	CASP8;BCL2L11;BID;YWHAH										RNA polymerase II transcription corepressor activity (GO:0001106)	1/27	0.587568	1	1.14844	0.610696	HSPA1A
regulation of metal ion transport (GO:0010959)	4/38	0.0332611	0.520649	3.26397	11.1085	SLN;SRI;ATP1A1;YWHAH										alpha-tubulin binding (GO:0043014)	1/27	0.587568	1	1.14844	0.610696	ARL4C
transmembrane receptor protein tyrosine kinase signaling pathway (GO:0007169)	20/397	0.0336156	0.524588	1.5621	5.29985	ATP6V1A;ANGPT2;ARPC1B;MVP;STAT3;NCF4;PDGFB;NEDD9;ARPC4;TCIRG1;PILRA;SULF1;MMP9;PGF;RASGRP4;SDCBP;ZAP70;DDIT4;ATP6V1H;EPHB4										transcriptional repressor activity, RNA polymerase II transcription regulatory region sequence-specific binding (GO:0001227)	5/160	0.591128	1	0.968992	0.509421	TGIF1;CEBPB;ENO1;TCF3;ETS2
positive regulation of defense response (GO:0031349)	6/75	0.033946	0.528129	2.48062	8.3919	IL33;CCL4;CCL3;ADAM8;S100A9;S100A8										protein serine/threonine phosphatase activity (GO:0004722)	2/62	0.598706	1	1.00025	0.513112	MYH8;CDKN3
negative regulation of cell growth (GO:0030308)	8/116	0.0341907	0.530319	2.13847	7.21904	CDKN1A;BTG1;CCDC85B;ENO1;INHBA;HSPA1B;SIPA1;HSPA1A										cyclin-dependent protein serine/threonine kinase regulator activity (GO:0016538)	1/28	0.600887	1	1.10742	0.564063	CDKN1A
cellular response to oxidative stress (GO:0034599)	8/116	0.0341907	0.528712	2.13847	7.21904	PRDX1;NCF4;TPM1;P4HB;CPEB2;MMP9;HSPA1B;HSPA1A										RNA polymerase II core promoter sequence-specific DNA binding (GO:0000979)	1/28	0.600887	1	1.10742	0.564063	SOX11
regulation of I-kappaB kinase/NF-kappaB signaling (GO:0043122)	12/205	0.0343914	0.530209	1.81509	6.11676	CASP8;TNIP2;IL1B;MIER1;F2R;BCL3;FLNA;BCL10;LTBR;RHOC;LITAF;MYD88										transcription regulatory region sequence-specific DNA binding (GO:0000976)	9/293	0.606176	1	0.952457	0.476785	NFE2;XBP1;CEBPB;SALL2;TAL1;SOX11;ENO1;RUNX1;FOSL2
regulation of cytoskeleton organization (GO:0051493)	7/96	0.0355977	0.547154	2.26098	7.54145	RHOC;S100A9;CORO1A;ARHGEF5;S100A8;CLASP1;RHOB										microtubule binding (GO:0008017)	6/196	0.608665	1	0.949217	0.471275	BCL2L11;BIRC5;S100A9;NDRG1;S100A8;CLASP1
regulation of tumor necrosis factor-mediated signaling pathway (GO:0010803)	5/57	0.03634	0.556886	2.71998	9.01628	CASP8;CASP4;TRAF1;HSPA1B;HSPA1A										Rab GTPase binding (GO:0017137)	4/131	0.613589	1	0.946802	0.462446	USP6NL;ADPRH;TBC1D9;NDRG1
cellular defense response (GO:0006968)	5/57	0.03634	0.555219	2.71998	9.01628	CX3CR1;TYROBP;CLEC5A;TCIRG1;CCR5										RNA polymerase II repressing transcription factor binding (GO:0001103)	1/29	0.613776	1	1.06923	0.521919	STAT3
glycosaminoglycan catabolic process (GO:0006027)	5/57	0.03634	0.553562	2.71998	9.01628	SDC4;BGN;SDC1;CD44;SGSH										cation transmembrane transporter activity (GO:0008324)	3/98	0.616418	1	0.949217	0.45926	SLC1A4;ATP2B2;ATP13A3
negative regulation of viral transcription (GO:0032897)	3/23	0.0366036	0.555917	4.04449	13.3776	ZFP36;CCL4;CCL3										core promoter binding (GO:0001047)	3/98	0.616418	1	0.949217	0.45926	MMP12;XBP1;RUNX1
negative regulation of signal transduction in absence of ligand (GO:1901099)	3/23	0.0366036	0.554267	4.04449	13.3776	IL1B;HSPA1B;HSPA1A										carboxylic acid transmembrane transporter activity (GO:0046943)	2/65	0.6245	1	0.954085	0.449187	SLC1A4;EMB
negative regulation of extrinsic apoptotic signaling pathway in absence of ligand (GO:2001240)	3/23	0.0366036	0.552627	4.04449	13.3776	IL1B;HSPA1B;HSPA1A										enhancer sequence-specific DNA binding (GO:0001158)	2/65	0.6245	1	0.954085	0.449187	XBP1;SOX11
cellular response to amyloid-beta (GO:1904646)	3/23	0.0366036	0.550997	4.04449	13.3776	CASP4;FPR2;FCGR2B										nucleobase-containing compound kinase activity (GO:0019205)	1/31	0.638321	1	1.00025	0.449026	UCK2
regulation of cell death (GO:0010941)	7/97	0.0373458	0.560517	2.23767	7.35643	BNIP3L;SOX11;JUNB;HSPA1B;CTGF;IER3;HSPA1A										protein serine/threonine kinase inhibitor activity (GO:0030291)	1/31	0.638321	1	1.00025	0.449026	CDKN1A
cellular metal ion homeostasis (GO:0006875)	7/97	0.0373458	0.558873	2.23767	7.35643	CCL7;CCL3;STC1;ATP1B3;ATP2B2;ATP1A1;ATP13A3										secondary active transmembrane transporter activity (GO:0015291)	2/67	0.640971	1	0.925605	0.411681	SLC7A7;SLCO4A1
positive regulation of protein serine/threonine kinase activity (GO:0071902)	8/119	0.0388818	0.580157	2.08455	6.76903	EDN1;RALB;IL1B;PDGFB;CHI3L1;ADAM8;CARD14;ADRA2A										translation factor activity, RNA binding (GO:0008135)	2/68	0.648991	1	0.911993	0.394287	SOX11;CPEB2
positive regulation of reactive oxygen species metabolic process (GO:2000379)	4/40	0.0391782	0.582875	3.10078	10.0454	CDKN1A;PDGFB;FPR2;THBS1										O-acyltransferase activity (GO:0008374)	1/32	0.650004	1	0.968992	0.41742	SOAT1
glomerular filtration (GO:0003094)	2/10	0.0393603	0.583883	6.20155	20.062	MCAM;SULF1										protein serine/threonine kinase activator activity (GO:0043539)	1/32	0.650004	1	0.968992	0.41742	IQGAP1
3'-UTR-mediated mRNA destabilization (GO:0061158)	2/10	0.0393603	0.58219	6.20155	20.062	ZFP36;ZFP36L1										ligand-gated channel activity (GO:0022834)	1/32	0.650004	1	0.968992	0.41742	DLG3
energy coupled proton transmembrane transport, against electrochemical gradient (GO:0015988)	2/10	0.0393603	0.580508	6.20155	20.062	ATP6V1H;ATP1A1										phosphatidylinositol-4,5-bisphosphate 3-kinase activity (GO:0046934)	2/69	0.656868	1	0.898775	0.37773	CD80;PDGFB
embryonic digestive tract morphogenesis (GO:0048557)	2/10	0.0393603	0.578835	6.20155	20.062	ID2;SOX11										monocarboxylic acid transmembrane transporter activity (GO:0008028)	1/33	0.661309	1	0.939629	0.388568	EMB
positive regulation of bone remodeling (GO:0046852)	2/10	0.0393603	0.577172	6.20155	20.062	SPP1;ADAM8										hydrolase activity, hydrolyzing O-glycosyl compounds (GO:0004553)	1/33	0.661309	1	0.939629	0.388568	CHI3L1
regulation of actin filament-based movement (GO:1903115)	2/10	0.0393603	0.575518	6.20155	20.062	STC1;SRI										transcription regulatory region DNA binding (GO:0044212)	11/375	0.668113	1	0.909561	0.366825	MMP12;NFE2;XBP1;CIITA;SALL2;TAL1;STAT3;TCF7;SOX11;TCF3;RUNX1
negative regulation of inclusion body assembly (GO:0090084)	2/10	0.0393603	0.573873	6.20155	20.062	HSPA1B;HSPA1A										organic anion transmembrane transporter activity (GO:0008514)	2/71	0.672197	1	0.873458	0.346941	ABCC3;SLCO4A1
T cell chemotaxis (GO:0010818)	2/10	0.0393603	0.572238	6.20155	20.062	CCL3;CXCL16										cyclin-dependent protein serine/threonine kinase activity (GO:0004693)	1/34	0.67225	1	0.911993	0.362175	CDKN1A
negative regulation of B cell proliferation (GO:0030889)	2/10	0.0393603	0.570613	6.20155	20.062	CD300A;FCGR2B										sodium-independent organic anion transmembrane transporter activity (GO:0015347)	1/34	0.67225	1	0.911993	0.362175	SLCO4A1
regulation of cytoplasmic translation (GO:2000765)	2/10	0.0393603	0.568996	6.20155	20.062	CPEB2;YBX3										transcriptional activator activity, RNA polymerase II core promoter proximal region sequence-specific binding (GO:0001077)	5/176	0.674406	1	0.880902	0.347008	KLF6;STAT3;SOX11;LITAF;NFKB2
positive regulation of reproductive process (GO:2000243)	2/10	0.0393603	0.567389	6.20155	20.062	INHBA;LHFPL2										sodium ion transmembrane transporter activity (GO:0015081)	2/72	0.679651	1	0.861326	0.332623	ATP1B3;ATP1A1
positive regulation of bone resorption (GO:0045780)	2/10	0.0393603	0.565791	6.20155	20.062	SPP1;ADAM8										phosphatidylinositol bisphosphate kinase activity (GO:0052813)	2/72	0.679651	1	0.861326	0.332623	CD80;PDGFB
ganglioside biosynthetic process (GO:0001574)	2/10	0.0393603	0.564201	6.20155	20.062	ST8SIA4;B4GALNT1										protein kinase regulator activity (GO:0019887)	3/108	0.681264	1	0.861326	0.330581	SOCS3;CDKN1A;BGN
negative regulation of protein autophosphorylation (GO:0031953)	2/10	0.0393603	0.562621	6.20155	20.062	ERRFI1;MVP										cyclin-dependent protein kinase activity (GO:0097472)	1/35	0.682838	1	0.885936	0.337983	CDKN1A
regulation of immunoglobulin production (GO:0002637)	2/10	0.0393603	0.561049	6.20155	20.062	XBP1;FCGR2B										neuropeptide receptor activity (GO:0008188)	1/36	0.693084	1	0.861326	0.315766	GPR84
very-low-density lipoprotein particle assembly (GO:0034379)	2/10	0.0393603	0.559487	6.20155	20.062	SOAT1;P4HB										steroid hydroxylase activity (GO:0008395)	1/36	0.693084	1	0.861326	0.315766	CYP7B1
positive regulation of adaptive immune response based on somatic recombination of immune receptors built from immunoglobulin superfamily domains (GO:0002824)	2/10	0.0393603	0.557933	6.20155	20.062	IL1B;SLC11A1										mRNA binding (GO:0003729)	5/180	0.693369	1	0.861326	0.315411	ZFP36;CSTF2;CPEB2;YBX3;ZFP36L1
regulation of plasminogen activation (GO:0010755)	2/10	0.0393603	0.556387	6.20155	20.062	ENO1;THBS1										transcriptional activator activity, RNA polymerase II transcription regulatory region sequence-specific binding (GO:0001228)	8/285	0.703807	1	0.870393	0.305726	KLF6;SALL2;STAT3;SOX11;LITAF;RUNX1;FOSL2;NFKB2
positive regulation of nuclease activity (GO:0032075)	2/10	0.0393603	0.55485	6.20155	20.062	PTPN1;HSPA1A										frizzled binding (GO:0005109)	1/38	0.712596	1	0.815993	0.276492	SDCBP
activation of protein kinase activity (GO:0032147)	13/234	0.0407207	0.572446	1.72265	5.51424	SLC11A1;F2R;PDGFB;CXCR4;THBS1;DUSP6;ADRA2A;IRAK2;IL1B;SAA1;CHI3L1;CARD14;MAP4K4										phosphatidylinositol 3-kinase activity (GO:0035004)	2/77	0.714861	1	0.805396	0.270345	CD80;PDGFB
negative regulation of growth (GO:0045926)	8/121	0.0422373	0.592135	2.0501	6.48744	CDKN1A;BTG1;CCDC85B;ENO1;INHBA;HSPA1B;SIPA1;HSPA1A										steroid hormone receptor binding (GO:0035258)	2/77	0.714861	1	0.805396	0.270345	FHL2;YWHAH
regulation of release of cytochrome c from mitochondria (GO:0090199)	4/41	0.0423472	0.592049	3.02515	9.56507	BCL2L11;PLAUR;BID;MMP9										syntaxin binding (GO:0019905)	2/78	0.721501	1	0.795071	0.259528	TMED9;SNAP23
positive regulation of cytokine biosynthetic process (GO:0042108)	4/41	0.0423472	0.590431	3.02515	9.56507	CD80;IL1B;BCL10;THBS1										calcium ion transmembrane transporter activity (GO:0015085)	2/78	0.721501	1	0.795071	0.259528	ATP2B2;ATP13A3
regulation of ATPase activity (GO:0043462)	4/41	0.0423472	0.588822	3.02515	9.56507	MYL4;SLN;TPM1;ATP1B3										ATPase regulator activity (GO:0060590)	1/39	0.721882	1	0.795071	0.259108	ATP1B3
JAK-STAT cascade (GO:0007259)	4/41	0.0423472	0.587222	3.02515	9.56507	IFNAR2;PTPN1;STAT3;CCL2										potassium ion transmembrane transporter activity (GO:0015079)	1/39	0.721882	1	0.795071	0.259108	KCNN4
mitotic cytokinesis (GO:0000281)	5/60	0.0438728	0.606728	2.58398	8.07871	SNX18;INCENP;BRCA2;RHOC;RHOB										ribosome binding (GO:0043022)	1/39	0.721882	1	0.795071	0.259108	CPEB2
regulation of endothelial cell proliferation (GO:0001936)	6/80	0.0443858	0.612164	2.32558	7.2438	EGFL7;AKT3;PDGFB;SULF1;THBS1;PGF										amino acid binding (GO:0016597)	1/40	0.730869	1	0.775194	0.243039	ASS1
positive regulation of microtubule polymerization (GO:0031116)	3/25	0.0453531	0.623819	3.72093	11.5099	CLASP1;HSPA1B;HSPA1A										RNA polymerase II transcription coactivator activity (GO:0001105)	1/40	0.730869	1	0.775194	0.243039	SOX11
positive regulation of vascular endothelial growth factor production (GO:0010575)	3/25	0.0453531	0.622142	3.72093	11.5099	C3;IL1B;SULF1										regulatory region DNA binding (GO:0000975)	6/225	0.736692	1	0.826873	0.25268	CIITA;SALL2;TAL1;STAT3;TCF7;RUNX1
cell chemotaxis (GO:0060326)	5/61	0.0465762	0.637208	2.54162	7.79429	PDGFB;SAA1;ARRB2;FPR2;CXCL14										histone deacetylase activity (GO:0004407)	1/41	0.739566	1	0.756287	0.228166	MIER1
positive regulation of posttranscriptional gene silencing (GO:0060148)	2/11	0.0470985	0.64263	5.63777	17.2263	ZFP36;STAT3										histone acetyltransferase activity (GO:0004402)	1/42	0.747982	1	0.73828	0.214379	BRCA2
negative regulation of morphogenesis of an epithelium (GO:1905331)	2/11	0.0470985	0.640917	5.63777	17.2263	SULF1;CLASP1										phosphotransferase activity, phosphate group as acceptor (GO:0016776)	1/42	0.747982	1	0.73828	0.214379	DLG3
regulation of hippo signaling (GO:0035330)	2/11	0.0470985	0.639212	5.63777	17.2263	WWC2;SOX11										androgen receptor binding (GO:0050681)	1/43	0.756127	1	0.721111	0.201584	FHL2
nitric oxide biosynthetic process (GO:0006809)	2/11	0.0470985	0.637516	5.63777	17.2263	ARG2;GCH1										transferase activity, transferring pentosyl groups (GO:0016763)	1/43	0.756127	1	0.721111	0.201584	UPP1
negative regulation of blood vessel diameter (GO:0097756)	2/11	0.0470985	0.63583	5.63777	17.2263	EDNRA;EDN1										protein deacetylase activity (GO:0033558)	1/43	0.756127	1	0.721111	0.201584	MIER1
negative regulation of bone mineralization (GO:0030502)	2/11	0.0470985	0.634152	5.63777	17.2263	SRGN;CCL3										RNA polymerase II transcription factor binding (GO:0001085)	3/122	0.757816	1	0.762486	0.211449	TAL1;ID2;STAT3
regulation of hemopoiesis (GO:1903706)	2/11	0.0470985	0.632483	5.63777	17.2263	LGALS3;RUNX1										potassium channel regulator activity (GO:0015459)	1/44	0.764009	1	0.704722	0.189694	FLNA
T cell proliferation (GO:0042098)	2/11	0.0470985	0.630823	5.63777	17.2263	TNFSF14;SLC11A1										anion:cation symporter activity (GO:0015296)	1/44	0.764009	1	0.704722	0.189694	SLC10A4
renal filtration (GO:0097205)	2/11	0.0470985	0.629172	5.63777	17.2263	MCAM;SULF1										non-membrane spanning protein tyrosine kinase activity (GO:0004715)	1/44	0.764009	1	0.704722	0.189694	ZAP70
response to sterol (GO:0036314)	2/11	0.0470985	0.627529	5.63777	17.2263	CCL3;CCR5										polyubiquitin modification-dependent protein binding (GO:0031593)	1/44	0.764009	1	0.704722	0.189694	TNIP2
macrophage differentiation (GO:0030225)	2/11	0.0470985	0.625895	5.63777	17.2263	CASP8;MMP9										cholesterol binding (GO:0015485)	1/44	0.764009	1	0.704722	0.189694	SOAT1
protein kinase C signaling (GO:0070528)	2/11	0.0470985	0.624269	5.63777	17.2263	PLEK;PDGFB										RNA polymerase II transcription cofactor activity (GO:0001104)	2/85	0.764401	1	0.729594	0.196014	SOX11;HSPA1A
arginine metabolic process (GO:0006525)	2/11	0.0470985	0.622652	5.63777	17.2263	ARG1;ASS1										motor activity (GO:0003774)	2/86	0.770039	1	0.721111	0.188437	APPBP2;MYH8
negative regulation of intrinsic apoptotic signaling pathway in response to DNA damage by p53 class mediator (GO:1902166)	2/11	0.0470985	0.621043	5.63777	17.2263	MIF;CD44										transforming growth factor beta receptor binding (GO:0005160)	1/45	0.771636	1	0.689061	0.178634	INHBA
negative regulation of chemotaxis (GO:0050922)	2/11	0.0470985	0.619443	5.63777	17.2263	ANGPT2;THBS1										exopeptidase activity (GO:0008238)	1/46	0.779017	1	0.674082	0.168333	DPEP2
negative regulation of translation, ncRNA-mediated (GO:0040033)	2/11	0.0470985	0.61785	5.63777	17.2263	ZFP36;STAT3										oxidoreductase activity, acting on the CH-OH group of donors, NAD or NADP as acceptor (GO:0016616)	2/89	0.78625	1	0.696803	0.167568	RDH12;PGD
miRNA mediated inhibition of translation (GO:0035278)	2/11	0.0470985	0.616266	5.63777	17.2263	ZFP36;STAT3										transcription corepressor activity (GO:0003714)	5/204	0.791022	1	0.759994	0.178165	TGIF1;JUNB;YBX3;CDYL2;HSPA1A
endocytosis (GO:0006897)	14/264	0.0479104	0.625286	1.64435	4.99623	CD93;SLC11A1;FPR2;CORO1A;CXCL16;HSP90B1;SNX18;SAA1;PECAM1;ATP6V1H;CD14;FCGR2B;STEAP2;LRP12										sterol binding (GO:0032934)	1/49	0.799762	1	0.632811	0.141396	SOAT1
actin cytoskeleton reorganization (GO:0031532)	5/62	0.0493766	0.642777	2.50063	7.52258	PTPN1;PLEK;MICALL2;NEDD9;FLNA										ribonuclease activity (GO:0004540)	1/50	0.806236	1	0.620155	0.133568	PIWIL2
positive regulation of cellular amide metabolic process (GO:0034250)	5/62	0.0493766	0.641141	2.50063	7.52258	PIWIL2;PLK3;BCL3;VIM;THBS1										amyloid-beta binding (GO:0001540)	1/50	0.806236	1	0.620155	0.133568	FCGR2B
negative regulation of wound healing (GO:0061045)	3/26	0.0500805	0.648631	3.57782	10.7124	EDN1;KNG1;CLASP1										nucleoside-triphosphatase activity (GO:0017111)	11/425	0.811228	1	0.802554	0.167899	ARL4C;RALB;GCH1;MYH8;ATP6V1H;GNG8;RHOC;GSPT2;HSPA1B;HSPA1A;RHOB
response to amyloid-beta (GO:1904645)	3/26	0.0500805	0.646989	3.57782	10.7124	CASP4;FPR2;FCGR2B										transcriptional activator activity, RNA polymerase II transcription factor binding (GO:0001190)	1/51	0.8125	1	0.607995	0.126244	SOX11
positive regulation of nuclear division (GO:0051785)	3/26	0.0500805	0.645356	3.57782	10.7124	EDN1;IL1B;PDGFB										ATPase activity, coupled (GO:0042623)	2/95	0.815679	1	0.652795	0.132997	HSPA1B;HSPA1A
chondroitin sulfate proteoglycan biosynthetic process (GO:0050650)	3/26	0.0500805	0.64373	3.57782	10.7124	CSGALNACT1;CHST11;BGN										SH3/SH2 adaptor activity (GO:0005070)	1/52	0.818563	1	0.596303	0.119383	SKAP2
cellular response to epidermal growth factor stimulus (GO:0071364)	3/26	0.0500805	0.642113	3.57782	10.7124	ZFP36;IQGAP1;ZFP36L1										phosphatidylinositol kinase activity (GO:0052742)	1/52	0.818563	1	0.596303	0.119383	PI4K2B
positive regulation of neutrophil migration (GO:1902624)	3/26	0.0500805	0.640503	3.57782	10.7124	CXCL1;ADAM8;CXCL2										GDP binding (GO:0019003)	1/52	0.818563	1	0.596303	0.119383	RALB
regulation of vascular smooth muscle cell proliferation (GO:1904705)	3/26	0.0500805	0.638902	3.57782	10.7124	TPM1;PDGFB;MMP9										phosphoprotein phosphatase activity (GO:0004721)	3/137	0.822621	1	0.679002	0.132582	PTPN1;DUSP6;CDKN3
regulation of cellular protein localization (GO:1903827)	3/26	0.0500805	0.637309	3.57782	10.7124	PTPN1;RALB;LCP1										methylation-dependent protein binding (GO:0140034)	1/53	0.824429	1	0.585052	0.112953	MTF2
positive regulation of nitric oxide biosynthetic process (GO:0045429)	3/26	0.0500805	0.635723	3.57782	10.7124	EDN1;IL1B;ASS1										methylated histone binding (GO:0035064)	1/56	0.840917	1	0.55371	0.0959373	MTF2
signal transduction in response to DNA damage (GO:0042770)	3/26	0.0500805	0.634146	3.57782	10.7124	BCL3;BID;NDRG1										chloride transmembrane transporter activity (GO:0015108)	1/57	0.846061	1	0.543996	0.0909361	SLC1A4
positive regulation of nitric oxide metabolic process (GO:1904407)	3/26	0.0500805	0.632576	3.57782	10.7124	EDN1;IL1B;ASS1										serine-type endopeptidase inhibitor activity (GO:0004867)	1/57	0.846061	1	0.543996	0.0909361	SERPING1
second-messenger-mediated signaling (GO:0019932)	5/63	0.0522739	0.658651	2.46093	7.26285	EDN1;CCL3;CXCR4;FPR2;CCR5										G-protein coupled amine receptor activity (GO:0008227)	1/57	0.846061	1	0.543996	0.0909361	ADRA2A
positive regulation of interleukin-6 production (GO:0032755)	4/44	0.0526953	0.662326	2.81889	8.29663	XBP1;IL1B;F2R;MYD88										transferase activity, transferring acyl groups other than amino-acyl groups (GO:0016747)	1/57	0.846061	1	0.543996	0.0909361	SOAT1
regulation of interferon-gamma production (GO:0032649)	4/44	0.0526953	0.660698	2.81889	8.29663	SLC11A1;IL1B;CD14;HAVCR2										protein tyrosine kinase activity (GO:0004713)	3/148	0.860201	1	0.628536	0.0946503	ZAP70;CSF2RA;EPHB4
cytoskeleton organization (GO:0007010)	8/127	0.0534332	0.668308	1.95324	5.72168	FMNL3;CCL7;TPM1;CCL3;NEDD9;CCL2;FLNB;SIPA1										microtubule motor activity (GO:0003777)	1/61	0.865032	1	0.508324	0.0737013	APPBP2
negative regulation of signaling (GO:0023057)	6/84	0.0540364	0.6742	2.21484	6.46312	IL11;PTPN1;IL1B;MVP;OSM;EPHB4										transmembrane receptor protein tyrosine kinase activity (GO:0004714)	1/62	0.869398	1	0.500125	0.0699947	EPHB4
regulation of programmed cell death (GO:0043067)	14/269	0.054378	0.676807	1.61379	4.69902	BNIP3L;ACTN1;TNFRSF11A;INHBA;TNFRSF1B;NDRG1;BCL2L11;CASP8;BCL3;BIRC5;HS1BP3;LTBR;BID;MAP4K4										chloride channel activity (GO:0005254)	1/62	0.869398	1	0.500125	0.0699947	SLC1A4
regulation of pri-miRNA transcription from RNA polymerase II promoter (GO:1902893)	3/27	0.0550372	0.683345	3.44531	9.99051	STAT3;PDGFB;LILRB4										ubiquitin binding (GO:0043130)	1/63	0.873623	1	0.492187	0.0664976	CXCR4
regulation of NF-kappaB import into nucleus (GO:0042345)	3/27	0.0550372	0.681687	3.44531	9.99051	C1QTNF3;IL1B;BCL3										transmembrane receptor protein kinase activity (GO:0019199)	1/63	0.873623	1	0.492187	0.0664976	EPHB4
negative regulation of catalytic activity (GO:0043086)	3/27	0.0550372	0.680036	3.44531	9.99051	CAND1;SLN;ATP7A										anion transmembrane transporter activity (GO:0008509)	1/63	0.873623	1	0.492187	0.0664976	ABCC3
regulation of muscle contraction (GO:0006937)	3/27	0.0550372	0.678394	3.44531	9.99051	TPM1;SRI;ENO1										transcription factor activity, RNA polymerase II distal enhancer sequence-specific binding (GO:0003705)	1/65	0.881668	1	0.477042	0.0600787	CEBPB
positive regulation of protein depolymerization (GO:1901881)	2/12	0.0553367	0.680442	5.16796	14.9577	SLN;PLEK										sequence-specific double-stranded DNA binding (GO:1990837)	2/113	0.883381	1	0.54881	0.0680515	NFE2;SOX11
regulation of inclusion body assembly (GO:0090083)	2/12	0.0553367	0.678806	5.16796	14.9577	HSPA1B;HSPA1A										ligand-dependent nuclear receptor transcription coactivator activity (GO:0030374)	1/66	0.885496	1	0.469814	0.0571327	ACTN1
ribose phosphate metabolic process (GO:0019693)	2/12	0.0553367	0.677178	5.16796	14.9577	PGLS;PGD										mitogen-activated protein kinase kinase binding (GO:0031434)	1/66	0.885496	1	0.469814	0.0571327	EPHB4
regulation of IRE1-mediated unfolded protein response (GO:1903894)	2/12	0.0553367	0.675558	5.16796	14.9577	PTPN1;BCL2L11										anion channel activity (GO:0005253)	1/67	0.889201	1	0.462802	0.0543477	SLC1A4
pentose-phosphate shunt (GO:0006098)	2/12	0.0553367	0.673946	5.16796	14.9577	PGLS;PGD										kinase activity (GO:0016301)	6/281	0.8936	1	0.662087	0.0744828	TRRAP;AKT3;CCL3;CCL2;PRKAB1;MAP4K4
pyrimidine nucleoside salvage (GO:0043097)	2/12	0.0553367	0.672341	5.16796	14.9577	UCK2;UPP1										activating transcription factor binding (GO:0033613)	1/69	0.896256	1	0.449388	0.0492212	CIITA
mitochondrial outer membrane permeabilization (GO:0097345)	2/12	0.0553367	0.670744	5.16796	14.9577	BNIP3L;BCL2L11										ligand-gated ion channel activity (GO:0015276)	1/69	0.896256	1	0.449388	0.0492212	DLG3
regulation of intrinsic apoptotic signaling pathway in response to DNA damage by p53 class mediator (GO:1902165)	2/12	0.0553367	0.669155	5.16796	14.9577	MIF;CD44										ATPase activity (GO:0016887)	4/204	0.898486	1	0.607995	0.0650824	MYH8;ATP6V1H;HSPA1B;HSPA1A
cellular response to arsenic-containing substance (GO:0071243)	2/12	0.0553367	0.667573	5.16796	14.9577	GSTO2;CPEB2										core promoter sequence-specific DNA binding (GO:0001046)	1/74	0.911992	1	0.419024	0.0386023	SOX11
positive regulation of T-helper 1 type immune response (GO:0002827)	2/12	0.0553367	0.665998	5.16796	14.9577	SLC11A1;CD80										endonuclease activity (GO:0004519)	1/74	0.911992	1	0.419024	0.0386023	PIWIL2
regulation of interleukin-8 biosynthetic process (GO:0045414)	2/12	0.0553367	0.664431	5.16796	14.9577	BCL3;BCL10										ubiquitin-like protein-specific protease activity (GO:0019783)	1/75	0.914841	1	0.413437	0.0367981	TRRAP
nitric oxide metabolic process (GO:0046209)	2/12	0.0553367	0.662871	5.16796	14.9577	ARG2;GCH1										phosphotransferase activity, alcohol group as acceptor (GO:0016773)	5/255	0.917329	1	0.607995	0.0524633	HK3;AKT3;CCL3;CCL2;PRKAB1
negative regulation by host of viral transcription (GO:0043922)	2/12	0.0553367	0.661319	5.16796	14.9577	CCL4;CCL3										hydrolase activity, acting on carbon-nitrogen (but not peptide) bonds, in linear amides (GO:0016811)	1/76	0.917597	1	0.407997	0.0350864	MIER1
vasoconstriction (GO:0042310)	2/12	0.0553367	0.659774	5.16796	14.9577	EDN1;EDNRA										MAP kinase kinase kinase activity (GO:0004709)	1/79	0.925344	1	0.392503	0.0304542	EPHB4
regulation of mononuclear cell migration (GO:0071675)	2/12	0.0553367	0.658236	5.16796	14.9577	LGALS3;THBS1										immunoglobulin receptor binding (GO:0034987)	1/82	0.932363	1	0.378143	0.0264823	FLNA
aromatic compound biosynthetic process (GO:0019438)	2/12	0.0553367	0.656705	5.16796	14.9577	GCH1;HDC										single-stranded DNA binding (GO:0003697)	1/88	0.944487	1	0.352361	0.0201245	BRCA2
negative regulation of DNA damage response, signal transduction by p53 class mediator (GO:0043518)	2/12	0.0553367	0.655181	5.16796	14.9577	MIF;CD44										protein kinase activity (GO:0004672)	11/514	0.945392	1	0.66359	0.0372641	PLK3;ZAP70;CDKN1A;IRAK2;AKT3;CCL3;CCL2;PRKAB1;CSF2RA;EPHB4;MAP4K4
regulation of antigen receptor-mediated signaling pathway (GO:0050854)	2/12	0.0553367	0.653665	5.16796	14.9577	CD300A;RUNX1										thiol-dependent ubiquitinyl hydrolase activity (GO:0036459)	1/93	0.952915	1	0.333417	0.0160807	TRRAP
pyrimidine-containing compound salvage (GO:0008655)	2/12	0.0553367	0.652155	5.16796	14.9577	UCK2;UPP1										ion channel activity (GO:0005216)	1/94	0.95444	1	0.32987	0.0153819	DLG3
negative regulation of fibroblast growth factor receptor signaling pathway (GO:0040037)	2/12	0.0553367	0.650653	5.16796	14.9577	SULF1;THBS1										double-stranded DNA binding (GO:0003690)	1/100	0.962611	1	0.310078	0.0118158	YBX3
negative regulation of interleukin-12 production (GO:0032695)	2/12	0.0553367	0.649157	5.16796	14.9577	MEFV;THBS1										phosphatidylinositol binding (GO:0035091)	1/101	0.963823	1	0.307007	0.0113126	SNX18
positive regulation of vascular endothelial growth factor receptor signaling pathway (GO:0030949)	2/12	0.0553367	0.647668	5.16796	14.9577	IL1B;ITGA5										potassium channel activity (GO:0005267)	1/101	0.963823	1	0.307007	0.0113126	KCNN4
positive regulation of granulocyte macrophage colony-stimulating factor production (GO:0032725)	2/12	0.0553367	0.646186	5.16796	14.9577	CD80;IL1B										carboxylic ester hydrolase activity (GO:0052689)	1/104	0.967228	1	0.298151	0.00993479	PGLS
positive regulation of protein kinase B signaling (GO:0051897)	8/128	0.0554672	0.646231	1.93798	5.60458	F10;CD80;PDGFB;GCNT2;CCL3;CHI3L1;ADAM8;THBS1										RNA binding (GO:0003723)	32/1388	0.985089	1	0.714876	0.0107398	PIWIL2;CSTB;TES;CSTF2;ENO1;MKI67;CORO1A;GSPT2;YBX3;HSP90B1;ZFP36L1;LGALS3;ZFP36;PRDX1;FLNA;FLNB;HMGN2;RBM12;SEC63;PTPN1;ACTN1;SOX11;ASS1;MEX3A;CDC42EP4;MATR3;VIM;P4HB;CPEB2;ZCCHC3;HSPA1B;HSPA1A
amide biosynthetic process (GO:0043604)	4/45	0.0564234	0.655873	2.75624	7.92385	ARG2;ARG1;DEGS1;ASS1										magnesium ion binding (GO:0000287)	1/128	0.985146	1	0.242248	0.00362534	ADPRH
regulation of T cell activation (GO:0050863)	4/45	0.0564234	0.654383	2.75624	7.92385	LGALS3;SIRPA;CCL2;SIRPB1										cation channel activity (GO:0005261)	1/147	0.992066	1	0.210937	0.00168033	KCNN4
regulation of smooth muscle cell proliferation (GO:0048660)	4/45	0.0564234	0.652899	2.75624	7.92385	EDN1;ID2;PDGFB;THBS1										protein serine/threonine kinase activity (GO:0004674)	5/369	0.99294	1	0.420159	0.00297686	PLK3;CDKN1A;IRAK2;AKT3;MAP4K4
negative regulation of immune response (GO:0050777)	4/45	0.0564234	0.651422	2.75624	7.92385	LGALS3;CD300A;FCGR2B;HAVCR2										sequence-specific DNA binding (GO:0043565)	5/395	0.996182	1	0.392503	0.00150162	MMP12;NFE2;SALL2;MTF2;TCF7
myeloid cell differentiation (GO:0030099)	4/45	0.0564234	0.649951	2.75624	7.92385	IL11;TAL1;INHBA;RASGRP4										DNA binding (GO:0003677)	16/894	0.997311	1	0.554949	0.0014943	CENPT;NFE2;GTF2A1;CEBPB;XBP1;STAT3;TCF7;YEATS4;BRCA2;YBX3;ETS2;MMP12;SALL2;MTF2;TCF3;JUNB
regulation of mitotic nuclear division (GO:0007088)	6/85	0.0566324	0.65089	2.18878	6.28438	EDN1;IL1B;PDGFB;MKI67;HSPA1B;HSPA1A										ubiquitin-protein transferase activity (GO:0004842)	4/418	0.999425	1	0.296725	0.000170655	SPSB1;WSB1;BIRC5;PEX12
positive regulation of endocytosis (GO:0045807)	5/65	0.0583599	0.669238	2.38521	6.77669	SLC11A1;IL1B;SIRPA;FCGR2B;SIRPB1
positive regulation of cell adhesion (GO:0045785)	5/65	0.0583599	0.667737	2.38521	6.77669	TPM1;SAA1;SIRPA;ADAM8;SIRPB1
endocytic recycling (GO:0032456)	3/28	0.0602184	0.68746	3.32226	9.33481	ARL4C;EHD4;MICALL2
phagosome acidification (GO:0090383)	3/28	0.0602184	0.685925	3.32226	9.33481	ATP6V1A;ATP6V1H;TCIRG1
negative regulation of myeloid leukocyte differentiation (GO:0002762)	3/28	0.0602184	0.684398	3.32226	9.33481	CCL3;INHBA;LILRB4
regulation of protein transport (GO:0051223)	3/28	0.0602184	0.682877	3.32226	9.33481	PTPN1;SAA1;LCP1
regulation of vascular endothelial growth factor production (GO:0010574)	3/28	0.0602184	0.681363	3.32226	9.33481	C3;IL1B;SULF1
positive regulation of blood vessel endothelial cell migration (GO:0043536)	4/46	0.0602894	0.680656	2.69633	7.5729	SRPX2;AKT3;PDGFB;THBS1
nicotinamide nucleotide metabolic process (GO:0046496)	4/46	0.0602894	0.679154	2.69633	7.5729	HK3;PFKL;PGAM1;ENO2
positive regulation of epithelial cell proliferation (GO:0050679)	7/108	0.0603349	0.67817	2.00976	5.6431	MMP12;XBP1;EGFL7;AKT3;PDGFB;SOX11;PGF
glycolipid metabolic process (GO:0006664)	5/66	0.0615485	0.69029	2.34907	6.54905	UGCG;GM2A;B3GNT5;B4GALNT1;ST6GALNAC4
regulation of interleukin-1 beta production (GO:0032651)	2/13	0.0640347	0.716599	4.77042	13.1107	F2R;MEFV
sodium ion export from cell (GO:0036376)	2/13	0.0640347	0.715031	4.77042	13.1107	ATP1B3;ATP1A1
regulation of nitric-oxide synthase biosynthetic process (GO:0051769)	2/13	0.0640347	0.71347	4.77042	13.1107	EDN1;CCL2
negative regulation of hemostasis (GO:1900047)	2/13	0.0640347	0.711916	4.77042	13.1107	EDN1;KNG1
intestinal absorption (GO:0050892)	2/13	0.0640347	0.710368	4.77042	13.1107	F11R;ADRA2A
regulation of cell aging (GO:0090342)	2/13	0.0640347	0.708827	4.77042	13.1107	LMNA;MIF
steroid catabolic process (GO:0006706)	2/13	0.0640347	0.707293	4.77042	13.1107	SPP1;YWHAH
sodium ion export (GO:0071436)	2/13	0.0640347	0.705765	4.77042	13.1107	ATP1B3;ATP1A1
regulation of macrophage differentiation (GO:0045649)	2/13	0.0640347	0.704244	4.77042	13.1107	CASP8;INHBA
cellular potassium ion homeostasis (GO:0030007)	2/13	0.0640347	0.70273	4.77042	13.1107	ATP1B3;ATP1A1
catecholamine biosynthetic process (GO:0042423)	2/13	0.0640347	0.701222	4.77042	13.1107	MOXD1;GCH1
cellular response to interleukin-15 (GO:0071350)	2/13	0.0640347	0.69972	4.77042	13.1107	STAT3;IL2RG
positive regulation of muscle contraction (GO:0045933)	2/13	0.0640347	0.698225	4.77042	13.1107	F2R;ENO1
membrane repolarization (GO:0086009)	2/13	0.0640347	0.696736	4.77042	13.1107	ATP1B3;ATP1A1
prostanoid biosynthetic process (GO:0046457)	2/13	0.0640347	0.695254	4.77042	13.1107	EDN1;MIF
interleukin-15-mediated signaling pathway (GO:0035723)	2/13	0.0640347	0.693778	4.77042	13.1107	STAT3;IL2RG
negative regulation of chemokine production (GO:0032682)	2/13	0.0640347	0.692308	4.77042	13.1107	C1QTNF3;MEFV
interleukin-12-mediated signaling pathway (GO:0035722)	4/47	0.0642923	0.693622	2.63896	7.24213	MIF;LCP1;P4HB;LMNB1
pyruvate metabolic process (GO:0006090)	4/47	0.0642923	0.692159	2.63896	7.24213	HK3;PFKL;PGAM1;ENO2
cellular response to interleukin-12 (GO:0071349)	4/47	0.0642923	0.690702	2.63896	7.24213	MIF;LCP1;P4HB;LMNB1
positive regulation of ion transport (GO:0043270)	4/47	0.0642923	0.689251	2.63896	7.24213	CCL4;F2R;CCL3;ADRA2A
regulation of fibroblast proliferation (GO:0048145)	4/47	0.0642923	0.687806	2.63896	7.24213	CDKN1A;CD300A;PDGFB;MIF
cellular response to lipid (GO:0071396)	10/179	0.0650743	0.694715	1.73228	4.73297	ZFP36;XBP1;TNIP2;CD80;SPP1;CCL2;CD14;ATP1A1;CCR5;TNFRSF1B
regulation of cell motility (GO:2000145)	7/110	0.0652751	0.695405	1.97322	5.3852	ROBO4;INPP5F;SPATA13;LMNA;FLNA;RHOC;RHOB
positive regulation of sprouting angiogenesis (GO:1903672)	3/29	0.0656188	0.69761	3.2077	8.73743	SRPX2;AKT3;ITGA5
positive regulation of cell communication (GO:0010647)	3/29	0.0656188	0.696159	3.2077	8.73743	EDN1;CD80;SOX11
triglyceride homeostasis (GO:0070328)	3/29	0.0656188	0.694715	3.2077	8.73743	C1QTNF3;XBP1;ANGPTL4
positive regulation of fibroblast proliferation (GO:0048146)	3/29	0.0656188	0.693277	3.2077	8.73743	CDKN1A;PDGFB;MIF
cellular response to hypoxia (GO:0071456)	8/133	0.0663714	0.699779	1.86513	5.05914	BNIP3L;PLK3;LMNA;ADAM8;P4HB;NDRG1;CPEB2;ZFP36L1
regulation of MAPK cascade (GO:0043408)	11/204	0.0670807	0.705799	1.67199	4.51747	IL11;IL1B;F2R;PDGFB;OSM;TNFRSF11A;INHBA;LTBR;TNFRSF1B;EPHB4;ADRA2A
divalent metal ion transport (GO:0070838)	6/89	0.0677547	0.711424	2.09041	5.6271	SLN;SLC11A1;CCL3;ATP2B2;CCR5;KCNN4
negative regulation of JAK-STAT cascade (GO:0046426)	4/48	0.0684307	0.717047	2.58398	6.93006	SOCS3;INPP5F;BCL3;BGN
collagen fibril organization (GO:0030199)	3/30	0.0712327	0.744878	3.10078	8.19164	COL12A1;COL5A2;ATP7A
lung development (GO:0030324)	3/30	0.0712327	0.743355	3.10078	8.19164	ERRFI1;CHI3L1;SOX11
regulation of vasoconstriction (GO:0019229)	3/30	0.0712327	0.741838	3.10078	8.19164	F2R;ADM;AVPR1A
positive regulation of epidermal growth factor receptor signaling pathway (GO:0045742)	3/30	0.0712327	0.740327	3.10078	8.19164	PLAUR;MMP9;ADRA2A
MyD88-dependent toll-like receptor signaling pathway (GO:0002755)	3/30	0.0712327	0.738822	3.10078	8.19164	IRAK2;CD14;MYD88
semaphorin-plexin signaling pathway (GO:0071526)	3/30	0.0712327	0.737324	3.10078	8.19164	SEMA7A;FLNA;SEMA3F
positive regulation of chemotaxis (GO:0050921)	4/49	0.0727032	0.751022	2.53125	6.63533	PDGFB;CXCL1;CXCL2;THBS1
nucleoside salvage (GO:0043174)	2/14	0.0731544	0.754156	4.42968	11.5844	UCK2;UPP1
regulation of nuclear-transcribed mRNA catabolic process, deadenylation-dependent decay (GO:1900151)	2/14	0.0731544	0.752635	4.42968	11.5844	ZFP36;ZFP36L1
establishment or maintenance of actin cytoskeleton polarity (GO:0030950)	2/14	0.0731544	0.751121	4.42968	11.5844	RHOC;RHOB
negative regulation of intrinsic apoptotic signaling pathway by p53 class mediator (GO:1902254)	2/14	0.0731544	0.749613	4.42968	11.5844	MIF;CD44
copper ion transport (GO:0006825)	2/14	0.0731544	0.74811	4.42968	11.5844	ATP7A;STEAP2
negative regulation of biomineral tissue development (GO:0070168)	2/14	0.0731544	0.746614	4.42968	11.5844	SRGN;CCL3
cellular response to osmotic stress (GO:0071470)	2/14	0.0731544	0.745124	4.42968	11.5844	YBX3;ZFP36L1
negative regulation of endoplasmic reticulum stress-induced intrinsic apoptotic signaling pathway (GO:1902236)	2/14	0.0731544	0.74364	4.42968	11.5844	XBP1;HSPA1A
positive regulation of vascular smooth muscle cell proliferation (GO:1904707)	2/14	0.0731544	0.742161	4.42968	11.5844	PDGFB;MMP9
interleukin-6-mediated signaling pathway (GO:0070102)	2/14	0.0731544	0.740689	4.42968	11.5844	SOCS3;STAT3
regulation of protein modification by small protein conjugation or removal (GO:1903320)	2/14	0.0731544	0.739222	4.42968	11.5844	HSPA1B;HSPA1A
negative regulation of T cell receptor signaling pathway (GO:0050860)	2/14	0.0731544	0.737761	4.42968	11.5844	LGALS3;LILRB4
positive regulation of interleukin-8 secretion (GO:2000484)	2/14	0.0731544	0.736306	4.42968	11.5844	F2R;CD14
cellular response to organic cyclic compound (GO:0071407)	8/136	0.0735065	0.738393	1.82399	4.7613	IL1B;PDGFB;SPP1;CCL3;CCL2;ATP1A1;ZFP36L1;HSP90B1
apoptotic process (GO:0006915)	12/232	0.0736745	0.738627	1.60385	4.183	PLK3;BCL2L11;CASP8;TNFSF14;IL1B;CASP4;CXCR4;CD14;BID;MYD88;IER3;RHOB
regulation of JNK cascade (GO:0046328)	6/91	0.0737586	0.73802	2.04447	5.32984	SDCBP;IL1B;LTBR;FCGR2B;CTGF;MAP4K4
response to organic cyclic compound (GO:0014070)	5/70	0.0752662	0.751631	2.21484	5.72918	IL1B;STAT3;SPP1;CCL3;CCL2
positive regulation of developmental process (GO:0051094)	7/114	0.0758685	0.756166	1.90398	4.90991	XBP1;LMNA;PDGFB;SOX11;JUNB;CTGF;FAM129B
positive regulation of cellular protein metabolic process (GO:0032270)	6/92	0.0768709	0.764663	2.02224	5.18833	PIWIL2;CASP8;BCL3;INHBA;VIM;THBS1
regulation of cell migration involved in sprouting angiogenesis (GO:0090049)	3/31	0.0770543	0.764996	3.00075	7.69166	SRPX2;AKT3;THBS1
negative regulation of cation channel activity (GO:2001258)	3/31	0.0770543	0.763511	3.00075	7.69166	GPR35;SRI;MMP9
positive regulation of phospholipase C activity (GO:0010863)	3/31	0.0770543	0.762031	3.00075	7.69166	EDNRA;AVPR1A;RASGRP4
aminoglycan metabolic process (GO:0006022)	3/31	0.0770543	0.760557	3.00075	7.69166	SDC4;BGN;SDC1
chondroitin sulfate metabolic process (GO:0030204)	3/31	0.0770543	0.759089	3.00075	7.69166	CSGALNACT1;CHST11;BGN
positive regulation of reactive oxygen species biosynthetic process (GO:1903428)	3/31	0.0770543	0.757626	3.00075	7.69166	EDN1;IL1B;ASS1
positive regulation of endothelial cell migration (GO:0010595)	5/71	0.0789342	0.774618	2.18364	5.54458	EDN1;AKT3;PDGFB;THBS1;RHOB
cytoskeleton-dependent cytokinesis (GO:0061640)	5/71	0.0789342	0.773131	2.18364	5.54458	SNX18;INCENP;BRCA2;RHOC;RHOB
regulation of blood vessel endothelial cell migration (GO:0043535)	4/51	0.0816437	0.798138	2.43198	6.09306	ANGPT2;AKT3;PDGFB;THBS1
heparan sulfate proteoglycan biosynthetic process (GO:0015012)	2/15	0.0826597	0.806525	4.13437	10.3071	CSGALNACT1;EXT1
digestive tract morphogenesis (GO:0048546)	2/15	0.0826597	0.804986	4.13437	10.3071	ID2;SOX11
positive regulation of vasoconstriction (GO:0045907)	2/15	0.0826597	0.803452	4.13437	10.3071	F2R;AVPR1A
pyrimidine nucleoside biosynthetic process (GO:0046134)	2/15	0.0826597	0.801925	4.13437	10.3071	UCK2;UPP1
positive regulation of potassium ion transmembrane transport (GO:1901381)	2/15	0.0826597	0.800403	4.13437	10.3071	FLNA;ATP1B3
negative regulation of insulin secretion (GO:0046676)	2/15	0.0826597	0.798887	4.13437	10.3071	MIDN;ADRA2A
regulation of interleukin-4 production (GO:0032673)	2/15	0.0826597	0.797377	4.13437	10.3071	CEBPB;HAVCR2
unsaturated fatty acid biosynthetic process (GO:0006636)	2/15	0.0826597	0.795873	4.13437	10.3071	ALOX5AP;DEGS1
negative regulation of coagulation (GO:0050819)	2/15	0.0826597	0.794374	4.13437	10.3071	EDN1;KNG1
negative regulation of cell aging (GO:0090344)	2/15	0.0826597	0.792881	4.13437	10.3071	AKT3;MIF
dermatan sulfate proteoglycan biosynthetic process (GO:0050651)	2/15	0.0826597	0.791393	4.13437	10.3071	CSGALNACT1;BGN
negative regulation of interleukin-2 production (GO:0032703)	2/15	0.0826597	0.789911	4.13437	10.3071	ZFP36;HAVCR2
negative regulation of lipid catabolic process (GO:0050995)	2/15	0.0826597	0.788435	4.13437	10.3071	IL1B;ADRA2A
cellular biogenic amine biosynthetic process (GO:0042401)	2/15	0.0826597	0.786964	4.13437	10.3071	MOXD1;HDC
response to cholesterol (GO:0070723)	2/15	0.0826597	0.785498	4.13437	10.3071	CCL3;CCR5
ganglioside metabolic process (GO:0001573)	2/15	0.0826597	0.784038	4.13437	10.3071	ST8SIA4;B4GALNT1
regulation of macrophage chemotaxis (GO:0010758)	2/15	0.0826597	0.782583	4.13437	10.3071	MIF;THBS1
negative regulation of signal transduction by p53 class mediator (GO:1901797)	2/15	0.0826597	0.781134	4.13437	10.3071	MIF;CD44
negative regulation of axon extension involved in axon guidance (GO:0048843)	2/15	0.0826597	0.77969	4.13437	10.3071	SEMA7A;SEMA3F
positive regulation of interleukin-4 production (GO:0032753)	2/15	0.0826597	0.778252	4.13437	10.3071	CEBPB;HAVCR2
positive regulation of collagen metabolic process (GO:0010714)	2/15	0.0826597	0.776819	4.13437	10.3071	F2R;VIM
protein O-linked fucosylation (GO:0036066)	2/15	0.0826597	0.775391	4.13437	10.3071	THBS1;ADAMTS7
JAK-STAT cascade involved in growth hormone signaling pathway (GO:0060397)	2/15	0.0826597	0.773968	4.13437	10.3071	PTPN1;STAT3
positive regulation of collagen biosynthetic process (GO:0032967)	2/15	0.0826597	0.77255	4.13437	10.3071	F2R;VIM
positive regulation of potassium ion transport (GO:0043268)	2/15	0.0826597	0.771138	4.13437	10.3071	FLNA;ADRA2A
cytoplasmic sequestering of protein (GO:0051220)	2/15	0.0826597	0.769731	4.13437	10.3071	FLNA;NFKBIE
cellular sodium ion homeostasis (GO:0006883)	2/15	0.0826597	0.768329	4.13437	10.3071	ATP1B3;ATP1A1
histone acetylation (GO:0016573)	5/72	0.0826963	0.767272	2.15332	5.36731	BRPF1;YEATS2;TRRAP;YEATS4;BRCA2
negative regulation of cell-cell adhesion (GO:0022408)	3/32	0.0830773	0.769407	2.90698	7.23251	IL1RN;FXYD5;ASS1
alpha-amino acid metabolic process (GO:1901605)	3/32	0.0830773	0.768014	2.90698	7.23251	HDC;ATP7A;ASS1
skeletal system morphogenesis (GO:0048705)	3/32	0.0830773	0.766625	2.90698	7.23251	MMP13;SOX11;IFITM5
regulation of protein autophosphorylation (GO:0031952)	3/32	0.0830773	0.765241	2.90698	7.23251	ERRFI1;MVP;PDGFB
regulation of protein kinase B signaling (GO:0051896)	9/164	0.0843384	0.775457	1.70164	4.20803	F10;CD80;PDGFB;GCNT2;CCL3;CHI3L1;ADAM8;ARRB2;THBS1
cellular response to interferon-gamma (GO:0071346)	7/117	0.0844369	0.774966	1.85516	4.58551	CIITA;CCL7;PTAFR;CCL4;CCL3;CCL2;CD44
regulation of fat cell differentiation (GO:0045598)	5/73	0.0865518	0.792952	2.12382	5.19701	ZFP36;CEBPB;XBP1;CCDC85B;ZFP36L1
oxoacid metabolic process (GO:0043436)	3/33	0.0892953	0.81662	2.81889	6.80989	TPST2;MIF;SULF1
ceramide biosynthetic process (GO:0046513)	3/33	0.0892953	0.815159	2.81889	6.80989	ST8SIA4;B4GALNT1;DEGS1
protein trimerization (GO:0070206)	3/33	0.0892953	0.813703	2.81889	6.80989	C1QTNF3;ALOX5AP;MIF
purine ribonucleoside triphosphate metabolic process (GO:0009205)	3/33	0.0892953	0.812253	2.81889	6.80989	MYH8;HSPA1B;HSPA1A
regulation of cell-cell adhesion (GO:0022407)	3/33	0.0892953	0.810807	2.81889	6.80989	SIRPA;ADAM8;SIRPB1
regulation of nitric oxide biosynthetic process (GO:0045428)	3/33	0.0892953	0.809367	2.81889	6.80989	EDN1;IL1B;ASS1
positive regulation of myeloid leukocyte differentiation (GO:0002763)	3/33	0.0892953	0.807932	2.81889	6.80989	CASP8;ZFP36L1;RUNX1
lymphocyte differentiation (GO:0030098)	5/74	0.0904999	0.817382	2.09512	5.03333	TPD52;IL11;ZAP70;KLF6;TCF3
B cell differentiation (GO:0030183)	4/53	0.0910986	0.821336	2.34021	5.6067	TPD52;IL11;KLF6;TCF3
positive regulation of mitotic cell cycle (GO:0045931)	4/53	0.0910986	0.819888	2.34021	5.6067	EDN1;TAL1;IL1B;PDGFB
regulation of DNA binding (GO:0051101)	4/53	0.0910986	0.818444	2.34021	5.6067	ID2;BCL3;PLAUR;MMP9
positive regulation of secretion by cell (GO:1903532)	4/53	0.0910986	0.817006	2.34021	5.6067	EDN1;SOX11;ADAM8;CLASP1
neural tube development (GO:0021915)	2/16	0.0925162	0.828264	3.87597	9.22624	ALDH1A2;SOX11
positive regulation of nuclear-transcribed mRNA catabolic process, deadenylation-dependent decay (GO:1900153)	2/16	0.0925162	0.826813	3.87597	9.22624	ZFP36;ZFP36L1
regulation of systemic arterial blood pressure by hormone (GO:0001990)	2/16	0.0925162	0.825368	3.87597	9.22624	EDN1;AVPR1A
dendritic cell chemotaxis (GO:0002407)	2/16	0.0925162	0.823927	3.87597	9.22624	CXCR4;CCR5
positive regulation of secretion (GO:0051047)	2/16	0.0925162	0.822492	3.87597	9.22624	XBP1;SPP1
glucose transmembrane transport (GO:1904659)	2/16	0.0925162	0.821062	3.87597	9.22624	EDNRA;SLC2A1
glucose 6-phosphate metabolic process (GO:0051156)	2/16	0.0925162	0.819636	3.87597	9.22624	PGLS;PGD
histone H2A acetylation (GO:0043968)	2/16	0.0925162	0.818216	3.87597	9.22624	TRRAP;YEATS4
activation of NF-kappaB-inducing kinase activity (GO:0007250)	2/16	0.0925162	0.8168	3.87597	9.22624	CHI3L1;CARD14
sympathetic nervous system development (GO:0048485)	2/16	0.0925162	0.815389	3.87597	9.22624	SOX11;SEMA3F
positive regulation of lymphocyte differentiation (GO:0045621)	2/16	0.0925162	0.813983	3.87597	9.22624	ZAP70;XBP1
glutamine family amino acid catabolic process (GO:0009065)	2/16	0.0925162	0.812582	3.87597	9.22624	ARG1;GAD1
positive regulation of myotube differentiation (GO:0010831)	2/16	0.0925162	0.811186	3.87597	9.22624	CD53;FAM129B
bone morphogenesis (GO:0060349)	2/16	0.0925162	0.809795	3.87597	9.22624	MMP13;IFITM5
negative regulation of peptide hormone secretion (GO:0090278)	2/16	0.0925162	0.808408	3.87597	9.22624	MIDN;ADRA2A
positive regulation of cell migration involved in sprouting angiogenesis (GO:0090050)	2/16	0.0925162	0.807026	3.87597	9.22624	SRPX2;AKT3
regulation of stem cell proliferation (GO:0072091)	2/16	0.0925162	0.805649	3.87597	9.22624	SOX11;ZFP36L1
regulation of necroptotic process (GO:0060544)	2/16	0.0925162	0.804277	3.87597	9.22624	CASP8;YBX3
ruffle organization (GO:0031529)	2/16	0.0925162	0.802909	3.87597	9.22624	PLEK;TPM1
positive regulation of epithelial cell migration (GO:0010634)	5/75	0.0945394	0.819074	2.06718	4.87594	EDN1;MMP9;THBS1;CLASP1;RHOB
regulation of G-protein coupled receptor protein signaling pathway (GO:0008277)	5/75	0.0945394	0.817686	2.06718	4.87594	C3;EDN1;RGS16;PLEK;RASGRP4
nitrogen compound transport (GO:0071705)	5/75	0.0945394	0.816302	2.06718	4.87594	EDN1;SLC7A7;SLC11A1;SLC1A4;SLC7A11
regulation of T cell differentiation (GO:0045580)	3/34	0.0957016	0.824941	2.73598	6.42003	ZAP70;XBP1;RUNX1
regulation of intracellular protein transport (GO:0033157)	3/34	0.0957016	0.82355	2.73598	6.42003	PTPN1;PLK3;LCP1
negative regulation of cell motility (GO:2000146)	6/98	0.0970702	0.833922	1.89843	4.42776	IFITM1;TPM1;STC1;SRGAP3;SULF1;RHOB
regulation of actin cytoskeleton organization (GO:0032956)	5/76	0.0986695	0.846236	2.03998	4.72456	F11R;RHOC;CORO1A;ARHGEF5;RHOB
negative regulation of cell migration (GO:0030336)	7/122	0.0998937	0.855298	1.77913	4.0985	IFITM1;TPM1;STC1;SRGAP3;SULF1;CLASP1;RHOB
positive regulation of cell growth (GO:0030307)	6/99	0.100687	0.860647	1.87926	4.31428	SDCBP;SEMA7A;EDN1;S100A9;S100A8;CXCL16
negative regulation of cellular component organization (GO:0051129)	4/55	0.10105	0.862308	2.25511	5.16902	LGALS3;SLN;HSPA1B;HSPA1A
regulation of interleukin-8 production (GO:0032677)	3/35	0.102289	0.871424	2.65781	6.05967	IL1B;HSPA1B;HSPA1A
regulation of JUN kinase activity (GO:0043506)	3/35	0.102289	0.869971	2.65781	6.05967	EDN1;TNFRSF11A;ARHGEF5
positive regulation of DNA binding (GO:0043388)	3/35	0.102289	0.868524	2.65781	6.05967	PLAUR;MMP9;FAM129B
negative regulation of endothelial cell migration (GO:0010596)	3/35	0.102289	0.867081	2.65781	6.05967	ANGPT2;STC1;THBS1
positive regulation of cell development (GO:0010720)	3/35	0.102289	0.865643	2.65781	6.05967	EDN1;SOX11;FAM129B
positive regulation of protein processing (GO:0010954)	2/17	0.102692	0.867608	3.64797	8.30287	ADAM8;ENO1
negative regulation of axon guidance (GO:1902668)	2/17	0.102692	0.866174	3.64797	8.30287	SEMA7A;SEMA3F
response to interferon-alpha (GO:0035455)	2/17	0.102692	0.864745	3.64797	8.30287	IFNAR2;IFITM1
positive regulation of interleukin-6 secretion (GO:2000778)	2/17	0.102692	0.86332	3.64797	8.30287	XBP1;F2R
regulation of mitochondrial outer membrane permeabilization involved in apoptotic signaling pathway (GO:1901028)	2/17	0.102692	0.8619	3.64797	8.30287	BID;HSPA1A
negative regulation of intracellular transport (GO:0032387)	2/17	0.102692	0.860485	3.64797	8.30287	CD300A;HSPA1A
negative regulation of cellular carbohydrate metabolic process (GO:0010677)	2/17	0.102692	0.859074	3.64797	8.30287	C1QTNF3;PLEK
heterocycle biosynthetic process (GO:0018130)	2/17	0.102692	0.857668	3.64797	8.30287	GCH1;HDC
defense response to fungus (GO:0050832)	2/17	0.102692	0.856267	3.64797	8.30287	S100A9;S100A8
regulation of B cell receptor signaling pathway (GO:0050855)	2/17	0.102692	0.85487	3.64797	8.30287	CD300A;RUNX1
positive regulation of cation transmembrane transport (GO:1904064)	2/17	0.102692	0.853478	3.64797	8.30287	FLNA;CTSS
platelet-derived growth factor receptor signaling pathway (GO:0048008)	2/17	0.102692	0.85209	3.64797	8.30287	PTPN1;PDGFB
cellular monovalent inorganic cation homeostasis (GO:0030004)	2/17	0.102692	0.850707	3.64797	8.30287	ATP1B3;ATP1A1
hemopoiesis (GO:0030097)	5/77	0.102889	0.85096	2.01349	4.57889	TAL1;PLEK;INHBA;RASGRP4;RUNX1
sulfur compound biosynthetic process (GO:0044272)	7/123	0.103159	0.851815	1.76467	4.00841	CSGALNACT1;EXT1;B4GALT3;CHST11;GSTO2;BGN;CHST2
small GTPase mediated signal transduction (GO:0007264)	6/100	0.104374	0.860453	1.86047	4.20423	ABR;RASSF1;CDKN1A;RAPGEF5;RAPGEF6;ADRA2A
negative regulation of cellular response to growth factor stimulus (GO:0090288)	4/56	0.106207	0.874149	2.21484	4.96649	PTPN1;SULF1;THBS1;FAM129B
positive regulation of protein kinase activity (GO:0045860)	9/173	0.108058	0.887956	1.61312	3.58933	PTPN1;CDKN1A;RALB;DLG3;SLC11A1;PDGFB;IQGAP1;ADRA2A;MAP4K4
regulation of lipid metabolic process (GO:0019216)	6/101	0.10813	0.887121	1.84204	4.09748	GLIPR1;ID2;IL1B;FHL2;ANGPTL4;CTGF
regulation of cyclin-dependent protein kinase activity (GO:1904029)	3/36	0.109052	0.893245	2.58398	5.72592	CDKN1A;SERTAD1;CDKN3
positive regulation of NIK/NF-kappaB signaling (GO:1901224)	3/36	0.109052	0.891813	2.58398	5.72592	CHI3L1;CD14;CARD14
apical junction assembly (GO:0043297)	3/36	0.109052	0.890386	2.58398	5.72592	MICALL2;F11R;RHOC
positive regulation of ATPase activity (GO:0032781)	3/36	0.109052	0.888964	2.58398	5.72592	MYL4;TPM1;ATP1B3
neural crest cell development (GO:0014032)	3/36	0.109052	0.887546	2.58398	5.72592	SEMA7A;SOX11;SEMA3F
cellular response to oxygen-containing compound (GO:1901701)	13/275	0.109795	0.892169	1.46582	3.23821	XBP1;CD80;TPM1;PDGFB;TNFRSF1B;MMP9;ZFP36L1;HSP90B1;ZFP36;TNIP2;CCL2;CD14;CCR5
negative regulation of macromolecule metabolic process (GO:0010605)	7/125	0.109862	0.891295	1.73643	3.83497	SDCBP;ID2;PDGFB;CCL3;SOX11;MIF;HAVCR2
phosphatidylinositol-mediated signaling (GO:0048015)	4/57	0.11148	0.902984	2.17598	4.77392	EDN1;INPP5F;PTAFR;ZFP36L1
cellular iron ion homeostasis (GO:0006879)	4/57	0.11148	0.901553	2.17598	4.77392	ATP6V1A;CAND1;SLC11A1;CP
positive regulation of translation (GO:0045727)	5/79	0.111591	0.90103	1.96252	4.30362	PIWIL2;BCL3;VIM;YBX3;THBS1
negative regulation of cell communication (GO:0010648)	5/79	0.111591	0.899607	1.96252	4.30362	IL11;PTPN1;IL1B;OSM;EPHB4
cellular divalent inorganic cation homeostasis (GO:0072503)	6/102	0.111955	0.901118	1.82399	3.9939	CCL7;SLC11A1;CCL3;STC1;ATP2B2;ATP13A3
regulation of keratinocyte proliferation (GO:0010837)	2/18	0.113155	0.909339	3.44531	7.50731	ZFP36;ZFP36L1
regulation of lipid catabolic process (GO:0050994)	2/18	0.113155	0.907909	3.44531	7.50731	IL1B;ADRA2A
negative regulation of osteoclast differentiation (GO:0045671)	2/18	0.113155	0.906484	3.44531	7.50731	CCL3;LILRB4
prostaglandin biosynthetic process (GO:0001516)	2/18	0.113155	0.905063	3.44531	7.50731	EDN1;MIF
regulation of cellular response to growth factor stimulus (GO:0090287)	2/18	0.113155	0.903647	3.44531	7.50731	SULF1;DUSP6
glyceraldehyde-3-phosphate metabolic process (GO:0019682)	2/18	0.113155	0.902235	3.44531	7.50731	PGLS;PGD
mRNA destabilization (GO:0061157)	2/18	0.113155	0.900827	3.44531	7.50731	ZFP36;ZFP36L1
negative regulation of calcium-mediated signaling (GO:0050849)	2/18	0.113155	0.899424	3.44531	7.50731	PLEK;SRI
transferrin transport (GO:0033572)	3/37	0.115982	0.920459	2.51414	5.41627	ATP6V1A;ATP6V1H;TCIRG1
mRNA catabolic process (GO:0006402)	3/37	0.115982	0.919029	2.51414	5.41627	ZFP36;HSPA1B;HSPA1A
ferric iron transport (GO:0015682)	3/37	0.115982	0.917604	2.51414	5.41627	ATP6V1A;ATP6V1H;TCIRG1
activation of cysteine-type endopeptidase activity involved in apoptotic process (GO:0006919)	5/80	0.116072	0.916896	1.93798	4.17354	CASP8;CASP4;F2R;S100A9;S100A8
I-kappaB kinase/NF-kappaB signaling (GO:0007249)	4/58	0.116867	0.921746	2.13847	4.59069	IRAK2;BCL3;CD14;NFKB2
MAPK cascade (GO:0000165)	13/279	0.11893	0.936576	1.44481	3.07631	PDGFB;IL2RG;CSF2RA;DUSP6;RASGRP4;ZFP36L1;ZFP36;TNIP2;IL1B;CCL3;CCL2;CCR5;MAP4K4
positive regulation of stress-activated MAPK cascade (GO:0032874)	5/81	0.120636	0.948549	1.91406	4.04818	SDCBP;IL1B;LTBR;FCGR2B;CTGF
regulation of osteoclast differentiation (GO:0045670)	3/38	0.123072	0.966211	2.44798	5.12848	CEBPB;CCL3;LILRB4
positive regulation of stress fiber assembly (GO:0051496)	3/38	0.123072	0.964726	2.44798	5.12848	TPM1;ARHGEF5;CTGF
regulation of mitotic spindle assembly (GO:1901673)	2/19	0.123877	0.96955	3.26397	6.81669	HSPA1B;HSPA1A
positive regulation of transforming growth factor beta receptor signaling pathway (GO:0030511)	2/19	0.123877	0.968065	3.26397	6.81669	SDCBP;THBS1
positive regulation of heart contraction (GO:0045823)	2/19	0.123877	0.966585	3.26397	6.81669	EDN1;ADM
NADP metabolic process (GO:0006739)	2/19	0.123877	0.96511	3.26397	6.81669	PGLS;PGD
positive regulation of mononuclear cell migration (GO:0071677)	2/19	0.123877	0.963638	3.26397	6.81669	LGALS3;FPR2
positive regulation of oxidoreductase activity (GO:0051353)	2/19	0.123877	0.962172	3.26397	6.81669	EDN1;ATP7A
negative regulation of lipid metabolic process (GO:0045833)	2/19	0.123877	0.960709	3.26397	6.81669	IL1B;ADRA2A
regulation of transcription factor import into nucleus (GO:0042990)	2/19	0.123877	0.959252	3.26397	6.81669	BCL3;FLNA
positive regulation of pri-miRNA transcription from RNA polymerase II promoter (GO:1902895)	2/19	0.123877	0.957798	3.26397	6.81669	STAT3;PDGFB
positive regulation of cellular response to transforming growth factor beta stimulus (GO:1903846)	2/19	0.123877	0.956349	3.26397	6.81669	SDCBP;THBS1
response to interferon-beta (GO:0035456)	2/19	0.123877	0.954904	3.26397	6.81669	IFNAR2;IFITM1
negative regulation of cell death (GO:0060548)	5/82	0.125284	0.96429	1.89072	3.92734	BNIP3L;SOX11;HSPA1B;CTGF;HSPA1A
positive regulation of protein catabolic process (GO:0045732)	5/82	0.125284	0.962838	1.89072	3.92734	PLK3;IL1B;ADAM8;TNFRSF1B;ADRA2A
positive regulation of apoptotic process (GO:0043065)	14/308	0.125383	0.962149	1.40944	2.92654	BNIP3L;BTG1;PLEKHG2;F2R;BCL10;DUSP6;KNG1;RHOB;ABR;BCL2L11;CCL3;ITGA6;BID;ARHGEF5
positive regulation of protein secretion (GO:0050714)	5/83	0.130013	0.99618	1.86794	3.81082	C1QTNF3;XBP1;SAA1;ADAM8;MIF
positive regulation of transmembrane receptor protein serine/threonine kinase signaling pathway (GO:0090100)	5/83	0.130013	0.994686	1.86794	3.81082	SDCBP;SOX11;INHBA;SULF1;THBS1
ephrin receptor signaling pathway (GO:0048013)	5/83	0.130013	0.993197	1.86794	3.81082	SDCBP;ARPC1B;ARPC4;MMP9;EPHB4
positive regulation of neuron death (GO:1901216)	3/39	0.130316	0.994022	2.38521	4.86057	DDIT4;CCL3;FCGR2B
positive regulation of cellular catabolic process (GO:0031331)	6/107	0.132085	1	1.73875	3.51978	PTPN1;IL1B;ADAM8;MEFV;TNFRSF1B;ADRA2A
response to endoplasmic reticulum stress (GO:0034976)	6/107	0.132085	1	1.73875	3.51978	CEBPB;BCL2L11;CASP4;P4HB;THBS1;HSP90B1
regulation of stress fiber assembly (GO:0051492)	4/61	0.133683	1	2.0333	4.09156	TPM1;ARHGEF5;CLASP1;CTGF
proteoglycan metabolic process (GO:0006029)	2/20	0.134831	1	3.10078	6.21312	CSGALNACT1;SULF1
negative regulation of macromolecule biosynthetic process (GO:0010558)	2/20	0.134831	1	3.10078	6.21312	EDN1;CIITA
regulation of regulatory T cell differentiation (GO:0045589)	2/20	0.134831	1	3.10078	6.21312	LILRB4;RUNX1
negative regulation of ion transport (GO:0043271)	2/20	0.134831	1	3.10078	6.21312	STC1;ADRA2A
embryonic digestive tract development (GO:0048566)	2/20	0.134831	1	3.10078	6.21312	ID2;SOX11
Arp2/3 complex-mediated actin nucleation (GO:0034314)	2/20	0.134831	1	3.10078	6.21312	ARPC1B;ARPC4
positive regulation of gene silencing by miRNA (GO:2000637)	2/20	0.134831	1	3.10078	6.21312	ZFP36;STAT3
regulation of response to cytokine stimulus (GO:0060759)	2/20	0.134831	1	3.10078	6.21312	IRAK2;RUNX1
growth hormone receptor signaling pathway (GO:0060396)	2/20	0.134831	1	3.10078	6.21312	PTPN1;STAT3
eye morphogenesis (GO:0048592)	2/20	0.134831	1	3.10078	6.21312	STAT3;COL5A2
negative regulation of interferon-gamma production (GO:0032689)	2/20	0.134831	1	3.10078	6.21312	INHBA;HAVCR2
organonitrogen compound biosynthetic process (GO:1901566)	9/182	0.135142	1	1.53335	3.06889	ARG2;GSTO2;GCH1;ARG1;GCNT1;DEGS1;BCL10;INHBA;ASS1
regulation of extrinsic apoptotic signaling pathway via death domain receptors (GO:1902041)	3/40	0.137705	1	2.32558	4.61079	LGALS3;CASP8;THBS1
purine ribonucleoside monophosphate metabolic process (GO:0009167)	3/40	0.137705	1	2.32558	4.61079	MYH8;HSPA1B;HSPA1A
regulation of tyrosine phosphorylation of STAT protein (GO:0042509)	4/62	0.139497	1	2.0005	3.9404	SOCS3;INPP5F;STAT3;OSM
negative regulation of MAP kinase activity (GO:0043407)	4/62	0.139497	1	2.0005	3.9404	PTPN1;CD300A;IL1B;DUSP6
positive regulation of supramolecular fiber organization (GO:1902905)	5/85	0.139708	1	1.82399	3.58997	EDN1;CDC42EP4;PLEK;SYNPO;CLASP1
negative regulation of transport (GO:0051051)	3/41	0.145233	1	2.26886	4.37757	LGALS3;IL1B;CTTNBP2NL
positive regulation of epithelial to mesenchymal transition (GO:0010718)	3/41	0.145233	1	2.26886	4.37757	SDCBP;IL1B;GCNT2
positive regulation of mitotic nuclear division (GO:0045840)	3/41	0.145233	1	2.26886	4.37757	EDN1;IL1B;PDGFB
positive regulation of Ras protein signal transduction (GO:0046579)	3/41	0.145233	1	2.26886	4.37757	GPR35;F2R;RASGRP4
negative regulation of cytokine secretion (GO:0050710)	3/41	0.145233	1	2.26886	4.37757	SRGN;C1QTNF3;FCGR2B
negative regulation of catabolic process (GO:0009895)	3/41	0.145233	1	2.26886	4.37757	IL1B;FLNA;ADRA2A
regulation of intracellular transport (GO:0032386)	3/41	0.145233	1	2.26886	4.37757	PTPN1;INPP5F;LCP1
regulation of actin filament-based process (GO:0032970)	4/63	0.145411	1	1.96875	3.79612	RHOC;CORO1A;ARHGEF5;RHOB
stress-activated MAPK cascade (GO:0051403)	4/63	0.145411	1	1.96875	3.79612	ZFP36;IRAK2;TNIP2;ZFP36L1
hyaluronan metabolic process (GO:0030212)	2/21	0.145991	1	2.95312	5.68243	IL1B;CD44
intrinsic apoptotic signaling pathway in response to DNA damage by p53 class mediator (GO:0042771)	2/21	0.145991	1	2.95312	5.68243	DDIT4;BCL3
negative regulation of G-protein coupled receptor protein signaling pathway (GO:0045744)	2/21	0.145991	1	2.95312	5.68243	PLEK;ADRA2A
negative regulation of protein tyrosine kinase activity (GO:0061099)	2/21	0.145991	1	2.95312	5.68243	ERRFI1;MVP
positive regulation of BMP signaling pathway (GO:0030513)	2/21	0.145991	1	2.95312	5.68243	SOX11;SULF1
regulation of interleukin-2 production (GO:0032663)	2/21	0.145991	1	2.95312	5.68243	RUNX1;HAVCR2
embryonic skeletal system development (GO:0048706)	2/21	0.145991	1	2.95312	5.68243	SOX11;SULF1
positive regulation of cellular biosynthetic process (GO:0031328)	8/160	0.1464	1	1.55039	2.97893	PIWIL2;EDN1;IL1B;BCL3;PDGFB;VIM;THBS1;ASS1
negative regulation of cytokine production (GO:0001818)	6/111	0.149339	1	1.67609	3.18715	SRGN;SLC11A1;MEFV;FCGR2B;THBS1;HAVCR2
positive regulation of establishment of protein localization to mitochondrion (GO:1903749)	6/111	0.149339	1	1.67609	3.18715	UGCG;BCL2L11;CASP8;MICALL2;BID;YWHAH
cellular response to insulin stimulus (GO:0032869)	6/111	0.149339	1	1.67609	3.18715	ATP6V1A;XBP1;ATP6V1H;TCIRG1;CPEB2;ZFP36L1
regulation of peptidyl-serine phosphorylation (GO:0033135)	5/87	0.14971	1	1.78205	3.38422	IL11;DDIT4;OSM;MIF;CD44
phagocytosis (GO:0006909)	7/136	0.150648	1	1.59599	3.0209	C3;CD93;SLC11A1;PECAM1;CD14;FCGR2B;CORO1A
adenylate cyclase-inhibiting G-protein coupled receptor signaling pathway (GO:0007193)	4/64	0.15142	1	1.93798	3.65832	RGS1;FLNA;FPR2;ADRA2A
iron ion homeostasis (GO:0055072)	4/64	0.15142	1	1.93798	3.65832	ATP6V1A;CAND1;SLC11A1;CP
regulation of proteolysis (GO:0030162)	4/64	0.15142	1	1.93798	3.65832	CSTB;CASP8;PLAUR;KNG1
regulation of calcium-mediated signaling (GO:0050848)	3/42	0.152893	1	2.21484	4.1595	PLEK;CCL4;CCL3
calcium-dependent cell-cell adhesion via plasma membrane cell adhesion molecules (GO:0016339)	3/42	0.152893	1	2.21484	4.1595	SELP;SELL;DCHS1
negative regulation of STAT cascade (GO:1904893)	3/42	0.152893	1	2.21484	4.1595	SOCS3;BCL3;BGN
gluconeogenesis (GO:0006094)	3/42	0.152893	1	2.21484	4.1595	PGAM1;ENO1;ENO2
negative regulation of intracellular signal transduction (GO:1902532)	8/162	0.15368	1	1.53125	2.86784	CASP8;WWC2;DDIT4;PLEK;PLAUR;ARRB2;MMP9;THBS1
calcium ion homeostasis (GO:0055074)	5/88	0.154821	1	1.7618	3.28662	CCL7;CCL3;STC1;ATP2B2;ATP13A3
regulation of interferon-gamma-mediated signaling pathway (GO:0060334)	2/22	0.157331	1	2.81889	5.21326	SOCS3;ARG1
protein homotrimerization (GO:0070207)	2/22	0.157331	1	2.81889	5.21326	ALOX5AP;MIF
hematopoietic progenitor cell differentiation (GO:0002244)	2/22	0.157331	1	2.81889	5.21326	PLEK;INHBA
negative regulation of response to endoplasmic reticulum stress (GO:1903573)	2/22	0.157331	1	2.81889	5.21326	XBP1;HSPA1A
regulation of DNA biosynthetic process (GO:2000278)	2/22	0.157331	1	2.81889	5.21326	PDGFB;FAM129B
negative regulation of myeloid cell differentiation (GO:0045638)	2/22	0.157331	1	2.81889	5.21326	ZFP36;ZFP36L1
regulation of cytokine production involved in inflammatory response (GO:1900015)	2/22	0.157331	1	2.81889	5.21326	MEFV;MYD88
cellular response to unfolded protein (GO:0034620)	2/22	0.157331	1	2.81889	5.21326	HSPA1B;HSPA1A
negative regulation of GTPase activity (GO:0034260)	2/22	0.157331	1	2.81889	5.21326	F11R;CPEB2
regulation of bone resorption (GO:0045124)	2/22	0.157331	1	2.81889	5.21326	SPP1;ADAM8
positive regulation of phosphatase activity (GO:0010922)	2/22	0.157331	1	2.81889	5.21326	CD300A;PLEK
positive regulation of JAK-STAT cascade (GO:0046427)	4/65	0.157523	1	1.90817	3.52665	SOCS3;F2R;STAT3;OSM
muscle contraction (GO:0006936)	7/138	0.158738	1	1.57286	2.89485	MYL4;EDNRA;TPM4;TPM1;MYH8;VIM;ACTG2
T cell activation (GO:0042110)	5/89	0.160004	1	1.74201	3.19233	ZAP70;CASP8;TNFSF14;CLEC7A;LCP1
positive regulation of protein complex assembly (GO:0031334)	5/89	0.160004	1	1.74201	3.19233	TAL1;PLEK;MMP3;LCP1;BID
regulation of cell cycle (GO:0051726)	10/216	0.161568	1	1.43554	2.61675	SDCBP;ID2;STAT3;BIRC5;IQGAP1;INHBA;JUNB;SIPA1;RHOB;MAP4K4
regulation of organelle organization (GO:0033043)	6/114	0.162909	1	1.63199	2.96134	USP6NL;TMED9;TBC1D9;S100A9;S100A8;ARHGEF5
O-glycan processing (GO:0016266)	4/66	0.163715	1	1.87926	3.40076	B3GNT5;GCNT1;ST6GALNAC4;GALNT10
regulation of myeloid cell differentiation (GO:0045637)	4/66	0.163715	1	1.87926	3.40076	LGALS3;NFE2;THBS1;RUNX1
cellular response to reactive oxygen species (GO:0034614)	4/66	0.163715	1	1.87926	3.40076	MMP3;TPM1;MMP9;RHOB
cellular response to growth factor stimulus (GO:0071363)	7/140	0.167021	1	1.55039	2.77463	ZFP36;PDGFB;CCL2;IQGAP1;CD44;ZFP36L1;ADAMTS7
neuron differentiation (GO:0030182)	7/140	0.167021	1	1.55039	2.77463	XBP1;ID2;DDIT4;SOX11;ATP2B2;INHBA;RUNX1
positive regulation of interferon-gamma production (GO:0032729)	3/44	0.168578	1	2.11416	3.76396	SLC11A1;IL1B;CD14
regulation of B cell proliferation (GO:0030888)	3/44	0.168578	1	2.11416	3.76396	CD300A;MIF;FCGR2B
RNA catabolic process (GO:0006401)	3/44	0.168578	1	2.11416	3.76396	ZFP36;HSPA1B;HSPA1A
histone H3 acetylation (GO:0043966)	3/44	0.168578	1	2.11416	3.76396	BRPF1;YEATS2;BRCA2
regulation of natural killer cell mediated cytotoxicity (GO:0042269)	2/23	0.168829	1	2.69633	4.79641	ARRB2;PVR
regulation of axon extension involved in axon guidance (GO:0048841)	2/23	0.168829	1	2.69633	4.79641	SEMA7A;SEMA3F
regulation of protein oligomerization (GO:0032459)	2/23	0.168829	1	2.69633	4.79641	MMP3;BID
positive regulation of ERBB signaling pathway (GO:1901186)	2/23	0.168829	1	2.69633	4.79641	PLAUR;MMP9
positive regulation of mRNA catabolic process (GO:0061014)	2/23	0.168829	1	2.69633	4.79641	ZFP36;ZFP36L1
cellular nitrogen compound biosynthetic process (GO:0044271)	2/23	0.168829	1	2.69633	4.79641	ARG2;GCH1
positive regulation of blood circulation (GO:1903524)	2/23	0.168829	1	2.69633	4.79641	F2R;AVPR1A
regulation of interleukin-8 secretion (GO:2000482)	2/23	0.168829	1	2.69633	4.79641	F2R;CD14
cellular response to interleukin-6 (GO:0071354)	2/23	0.168829	1	2.69633	4.79641	SOCS3;STAT3
negative regulation of transcription factor import into nucleus (GO:0042992)	2/23	0.168829	1	2.69633	4.79641	C1QTNF3;NFKBIE
positive regulation of ion transmembrane transporter activity (GO:0032414)	2/23	0.168829	1	2.69633	4.79641	ATP1B3;CTSS
positive regulation of monooxygenase activity (GO:0032770)	2/23	0.168829	1	2.69633	4.79641	GCH1;IL1B
regulation of cell size (GO:0008361)	2/23	0.168829	1	2.69633	4.79641	EDN1;PLEK
negative regulation of axon extension (GO:0030517)	2/23	0.168829	1	2.69633	4.79641	SEMA7A;SEMA3F
purine ribonucleotide metabolic process (GO:0009150)	4/67	0.169993	1	1.85121	3.28034	TPST2;MYH8;HSPA1B;HSPA1A
regulation of small GTPase mediated signal transduction (GO:0051056)	7/141	0.171233	1	1.53939	2.71661	ABR;PLEKHG2;ARHGAP29;SRGAP3;RHOC;ARHGEF5;RHOB
protein O-linked glycosylation (GO:0006493)	6/116	0.172239	1	1.60385	2.82097	B3GNT5;GCNT1;ST6GALNAC4;THBS1;GALNT10;ADAMTS7
phospholipase C-activating G-protein coupled receptor signaling pathway (GO:0007200)	5/92	0.17596	1	1.6852	2.92803	GPR35;F2R;FPR2;GPR84;ADRA2A
positive regulation of endothelial cell proliferation (GO:0001938)	4/68	0.176354	1	1.82399	3.16509	EGFL7;AKT3;PDGFB;PGF
regulation of cyclin-dependent protein serine/threonine kinase activity (GO:0000079)	4/68	0.176354	1	1.82399	3.16509	CDKN1A;SERTAD1;PDGFB;CDKN3
regulation of cardiac conduction (GO:1903779)	4/68	0.176354	1	1.82399	3.16509	ATP1B3;ATP2B2;ATP1A1;SRI
sprouting angiogenesis (GO:0002040)	3/45	0.176589	1	2.06718	3.58435	ESM1;THBS1;EPHB4
hexose biosynthetic process (GO:0019319)	3/45	0.176589	1	2.06718	3.58435	PGAM1;ENO1;ENO2
cellular response to lipoteichoic acid (GO:0071223)	1/6	0.178574	1	5.16796	8.90311	CD14
vitamin A metabolic process (GO:0006776)	1/6	0.178574	1	5.16796	8.90311	ALDH1A2
protein sulfation (GO:0006477)	1/6	0.178574	1	5.16796	8.90311	TPST2
positive regulation of skeletal muscle fiber development (GO:0048743)	1/6	0.178574	1	5.16796	8.90311	FAM129B
granzyme-mediated apoptotic signaling pathway (GO:0008626)	1/6	0.178574	1	5.16796	8.90311	SRGN
positive regulation of cellular extravasation (GO:0002693)	1/6	0.178574	1	5.16796	8.90311	ADAM8
regulation of histone H3-K27 methylation (GO:0061085)	1/6	0.178574	1	5.16796	8.90311	MTF2
vocal learning (GO:0042297)	1/6	0.178574	1	5.16796	8.90311	CNTNAP2
arginine biosynthetic process (GO:0006526)	1/6	0.178574	1	5.16796	8.90311	ASS1
regulation of endothelial cell development (GO:1901550)	1/6	0.178574	1	5.16796	8.90311	IL1B
response to granulocyte macrophage colony-stimulating factor (GO:0097012)	1/6	0.178574	1	5.16796	8.90311	ZFP36
regulation of protein depolymerization (GO:1901879)	1/6	0.178574	1	5.16796	8.90311	SLN
regulation of lymphocyte apoptotic process (GO:0070228)	1/6	0.178574	1	5.16796	8.90311	LGALS3
B cell chemotaxis (GO:0035754)	1/6	0.178574	1	5.16796	8.90311	CYP7B1
amylin receptor signaling pathway (GO:0097647)	1/6	0.178574	1	5.16796	8.90311	ADM
regulation of hydrogen peroxide metabolic process (GO:0010310)	1/6	0.178574	1	5.16796	8.90311	MMP3
galactosylceramide metabolic process (GO:0006681)	1/6	0.178574	1	5.16796	8.90311	B4GALT3
SCF complex assembly (GO:0010265)	1/6	0.178574	1	5.16796	8.90311	CAND1
COPI coating of Golgi vesicle (GO:0048205)	1/6	0.178574	1	5.16796	8.90311	TMED9
dopamine catabolic process (GO:0042420)	1/6	0.178574	1	5.16796	8.90311	MOXD1
lipoxin biosynthetic process (GO:2001301)	1/6	0.178574	1	5.16796	8.90311	ALOX5AP
T-helper 17 cell lineage commitment (GO:0072540)	1/6	0.178574	1	5.16796	8.90311	STAT3
positive regulation of icosanoid secretion (GO:0032305)	1/6	0.178574	1	5.16796	8.90311	IL1B
peripheral nervous system neuron development (GO:0048935)	1/6	0.178574	1	5.16796	8.90311	RUNX1
cellular hyperosmotic response (GO:0071474)	1/6	0.178574	1	5.16796	8.90311	YBX3
regulation of superoxide metabolic process (GO:0090322)	1/6	0.178574	1	5.16796	8.90311	GCH1
negative regulation of catecholamine secretion (GO:0033604)	1/6	0.178574	1	5.16796	8.90311	ADRA2A
positive regulation of ATP biosynthetic process (GO:2001171)	1/6	0.178574	1	5.16796	8.90311	ENO1
negative regulation of cellular response to hypoxia (GO:1900038)	1/6	0.178574	1	5.16796	8.90311	ENO1
regulation of phagocytosis, engulfment (GO:0060099)	1/6	0.178574	1	5.16796	8.90311	CD300A
negative regulation of acute inflammatory response (GO:0002674)	1/6	0.178574	1	5.16796	8.90311	FCGR2B
negative regulation of necroptotic process (GO:0060546)	1/6	0.178574	1	5.16796	8.90311	YBX3
indolalkylamine metabolic process (GO:0006586)	1/6	0.178574	1	5.16796	8.90311	ATP7A
astral microtubule organization (GO:0030953)	1/6	0.178574	1	5.16796	8.90311	CLASP1
negative regulation of lymphocyte differentiation (GO:0045620)	1/6	0.178574	1	5.16796	8.90311	INHBA
establishment of endothelial intestinal barrier (GO:0090557)	1/6	0.178574	1	5.16796	8.90311	F11R
response to lipoteichoic acid (GO:0070391)	1/6	0.178574	1	5.16796	8.90311	CD14
regulation of thymocyte apoptotic process (GO:0070243)	1/6	0.178574	1	5.16796	8.90311	ADAM8
positive regulation of receptor binding (GO:1900122)	1/6	0.178574	1	5.16796	8.90311	MMP9
positive regulation of podosome assembly (GO:0071803)	1/6	0.178574	1	5.16796	8.90311	LCP1
positive regulation of humoral immune response (GO:0002922)	1/6	0.178574	1	5.16796	8.90311	FCGR2B
positive regulation of extrinsic apoptotic signaling pathway via death domain receptors (GO:1902043)	1/6	0.178574	1	5.16796	8.90311	THBS1
cardiac ventricle formation (GO:0003211)	1/6	0.178574	1	5.16796	8.90311	SOX11
Golgi transport vesicle coating (GO:0048200)	1/6	0.178574	1	5.16796	8.90311	TMED9
nucleobase metabolic process (GO:0009112)	1/6	0.178574	1	5.16796	8.90311	UCK2
regulation of MHC class I biosynthetic process (GO:0045343)	1/6	0.178574	1	5.16796	8.90311	CIITA
positive regulation of fibroblast migration (GO:0010763)	1/6	0.178574	1	5.16796	8.90311	THBS1
negative regulation of neural precursor cell proliferation (GO:2000178)	1/6	0.178574	1	5.16796	8.90311	ID2
iron ion import across plasma membrane (GO:0098711)	1/6	0.178574	1	5.16796	8.90311	STEAP2
regulation of wound healing, spreading of epidermal cells (GO:1903689)	1/6	0.178574	1	5.16796	8.90311	CLASP1
platelet dense granule organization (GO:0060155)	1/6	0.178574	1	5.16796	8.90311	F2R
positive regulation of granulocyte differentiation (GO:0030854)	1/6	0.178574	1	5.16796	8.90311	RUNX1
COPI-coated vesicle budding (GO:0035964)	1/6	0.178574	1	5.16796	8.90311	TMED9
negative regulation of interferon-gamma-mediated signaling pathway (GO:0060336)	1/6	0.178574	1	5.16796	8.90311	ARG1
regulation of glucokinase activity (GO:0033131)	1/6	0.178574	1	5.16796	8.90311	MIDN
negative regulation of response to interferon-gamma (GO:0060331)	1/6	0.178574	1	5.16796	8.90311	ARG1
citrulline metabolic process (GO:0000052)	1/6	0.178574	1	5.16796	8.90311	ASS1
regulation of cellular response to oxidative stress (GO:1900407)	1/6	0.178574	1	5.16796	8.90311	GCH1
regulation of glial cell apoptotic process (GO:0034350)	1/6	0.178574	1	5.16796	8.90311	CCL2
negative regulation of complement activation (GO:0045916)	1/6	0.178574	1	5.16796	8.90311	SERPING1
regulation of phosphatidylinositol biosynthetic process (GO:0010511)	1/6	0.178574	1	5.16796	8.90311	PDGFB
regulation of NK T cell activation (GO:0051133)	1/6	0.178574	1	5.16796	8.90311	CD300A
photoreceptor cell differentiation (GO:0046530)	1/6	0.178574	1	5.16796	8.90311	STAT3
negative regulation of vasculature development (GO:1901343)	1/6	0.178574	1	5.16796	8.90311	PDGFB
chemical homeostasis within a tissue (GO:0048875)	1/6	0.178574	1	5.16796	8.90311	NAPSA
positive regulation of blood pressure (GO:0045777)	1/6	0.178574	1	5.16796	8.90311	ID2
regulation of chemokine-mediated signaling pathway (GO:0070099)	1/6	0.178574	1	5.16796	8.90311	EDN1
Golgi disassembly (GO:0090166)	1/6	0.178574	1	5.16796	8.90311	PLK3
regulation of hyaluronan biosynthetic process (GO:1900125)	1/6	0.178574	1	5.16796	8.90311	PDGFB
macrophage derived foam cell differentiation (GO:0010742)	1/6	0.178574	1	5.16796	8.90311	SOAT1
corticosteroid receptor signaling pathway (GO:0031958)	1/6	0.178574	1	5.16796	8.90311	YWHAH
hormone transport (GO:0009914)	1/6	0.178574	1	5.16796	8.90311	SLCO4A1
protein insertion into mitochondrial membrane involved in apoptotic signaling pathway (GO:0001844)	1/6	0.178574	1	5.16796	8.90311	BCL2L11
bile acid secretion (GO:0032782)	1/6	0.178574	1	5.16796	8.90311	ABCC3
positive regulation of histone phosphorylation (GO:0033129)	1/6	0.178574	1	5.16796	8.90311	IL1B
negative regulation of cytoplasmic translation (GO:2000766)	1/6	0.178574	1	5.16796	8.90311	CPEB2
positive regulation of T cell differentiation in thymus (GO:0033089)	1/6	0.178574	1	5.16796	8.90311	ADAM8
negative regulation of calcium ion-dependent exocytosis (GO:0045955)	1/6	0.178574	1	5.16796	8.90311	ADRA2A
cellular response to bacterial lipopeptide (GO:0071221)	1/6	0.178574	1	5.16796	8.90311	CD14
regulation of cardiac muscle hypertrophy in response to stress (GO:1903242)	1/6	0.178574	1	5.16796	8.90311	LMNA
positive regulation of keratinocyte migration (GO:0051549)	1/6	0.178574	1	5.16796	8.90311	MMP9
regulation of inositol phosphate biosynthetic process (GO:0010919)	1/6	0.178574	1	5.16796	8.90311	PLEK
imitative learning (GO:0098596)	1/6	0.178574	1	5.16796	8.90311	CNTNAP2
positive regulation of antigen processing and presentation (GO:0002579)	1/6	0.178574	1	5.16796	8.90311	SLC11A1
morphogenesis of an endothelium (GO:0003159)	1/6	0.178574	1	5.16796	8.90311	RHOB
positive regulation of oxidative stress-induced cell death (GO:1903209)	1/6	0.178574	1	5.16796	8.90311	MMP3
surfactant homeostasis (GO:0043129)	1/6	0.178574	1	5.16796	8.90311	NAPSA
astrocyte differentiation (GO:0048708)	1/6	0.178574	1	5.16796	8.90311	STAT3
negative regulation of cell cycle phase transition (GO:1901988)	1/6	0.178574	1	5.16796	8.90311	ZFP36L1
negative regulation of smooth muscle cell differentiation (GO:0051151)	1/6	0.178574	1	5.16796	8.90311	PDGFB
chondrocyte development (GO:0002063)	1/6	0.178574	1	5.16796	8.90311	SULF1
negative regulation of glial cell proliferation (GO:0060253)	1/6	0.178574	1	5.16796	8.90311	SOX11
cellular response to granulocyte macrophage colony-stimulating factor stimulus (GO:0097011)	1/6	0.178574	1	5.16796	8.90311	ZFP36
positive regulation of dendritic cell antigen processing and presentation (GO:0002606)	1/6	0.178574	1	5.16796	8.90311	SLC11A1
negative regulation of interleukin-6 secretion (GO:1900165)	1/6	0.178574	1	5.16796	8.90311	C1QTNF3
astrocyte activation (GO:0048143)	1/6	0.178574	1	5.16796	8.90311	FPR2
regulation of sarcomere organization (GO:0060297)	1/6	0.178574	1	5.16796	8.90311	EDN1
peptidyl-proline hydroxylation (GO:0019511)	1/6	0.178574	1	5.16796	8.90311	P4HB
glutamate catabolic process (GO:0006538)	1/6	0.178574	1	5.16796	8.90311	GAD1
neutrophil extravasation (GO:0072672)	1/6	0.178574	1	5.16796	8.90311	PECAM1
establishment of protein localization to telomere (GO:0070200)	1/6	0.178574	1	5.16796	8.90311	BRCA2
glucocorticoid receptor signaling pathway (GO:0042921)	1/6	0.178574	1	5.16796	8.90311	YWHAH
foam cell differentiation (GO:0090077)	1/6	0.178574	1	5.16796	8.90311	SOAT1
fructose 6-phosphate metabolic process (GO:0006002)	1/6	0.178574	1	5.16796	8.90311	PFKL
activation of MAPK activity (GO:0000187)	6/118	0.181784	1	1.57667	2.68812	IRAK2;IL1B;SAA1;CXCR4;THBS1;DUSP6
regulation of epithelial to mesenchymal transition (GO:0010717)	4/69	0.182795	1	1.79755	3.05474	SDCBP;IL1B;GCNT2;CLASP1
protein complex subunit organization (GO:0071822)	3/46	0.184703	1	2.02224	3.41558	COL12A1;COL5A2;ATP7A
cellular transition metal ion homeostasis (GO:0046916)	5/94	0.186921	1	1.64935	2.76608	ATP6V1A;CAND1;SLC11A1;ATP7A;CP
regulation of endothelial cell migration (GO:0010594)	4/70	0.189311	1	1.77187	2.94903	EDN1;STC1;THBS1;RHOB
regulation of innate immune response (GO:0045088)	4/70	0.189311	1	1.77187	2.94903	IFNAR2;PTPN1;ADAM8;FCGR2B
positive regulation of neutrophil chemotaxis (GO:0090023)	2/25	0.192211	1	2.48062	4.09094	CXCL1;CXCL2
negative regulation of cytoskeleton organization (GO:0051494)	2/25	0.192211	1	2.48062	4.09094	CORO1A;CLASP1
receptor clustering (GO:0043113)	2/25	0.192211	1	2.48062	4.09094	DLG3;FLNA
negative regulation of G1/S transition of mitotic cell cycle (GO:2000134)	2/25	0.192211	1	2.48062	4.09094	PLK3;CDKN1A
regulation of actin filament bundle assembly (GO:0032231)	2/25	0.192211	1	2.48062	4.09094	PLEK;SYNPO
intrinsic apoptotic signaling pathway in response to endoplasmic reticulum stress (GO:0070059)	2/25	0.192211	1	2.48062	4.09094	CEBPB;CASP4
regulation of epidermal growth factor-activated receptor activity (GO:0007176)	2/25	0.192211	1	2.48062	4.09094	ERRFI1;ADRA2A
positive regulation of endopeptidase activity (GO:0010950)	2/25	0.192211	1	2.48062	4.09094	STAT3;MEFV
cellular senescence (GO:0090398)	2/25	0.192211	1	2.48062	4.09094	CDKN1A;ID2
chaperone mediated protein folding requiring cofactor (GO:0051085)	2/25	0.192211	1	2.48062	4.09094	HSPA1B;HSPA1A
actin nucleation (GO:0045010)	2/25	0.192211	1	2.48062	4.09094	ARPC1B;ARPC4
proteoglycan biosynthetic process (GO:0030166)	2/25	0.192211	1	2.48062	4.09094	CSGALNACT1;EXT1
negative regulation of intrinsic apoptotic signaling pathway in response to DNA damage (GO:1902230)	2/25	0.192211	1	2.48062	4.09094	MIF;CD44
cytoplasmic pattern recognition receptor signaling pathway (GO:0002753)	2/25	0.192211	1	2.48062	4.09094	CASP8;IRAK2
regulation of cellular senescence (GO:2000772)	2/25	0.192211	1	2.48062	4.09094	ARG2;AKT3
skin development (GO:0043588)	5/95	0.192491	1	1.63199	2.68903	ERRFI1;COL5A2;ITGA6;ATP7A;ASPRV1
negative regulation of protein modification by small protein conjugation or removal (GO:1903321)	3/47	0.192913	1	1.97922	3.25683	ARRB2;HSPA1B;HSPA1A
mitotic spindle assembly (GO:0090307)	3/47	0.192913	1	1.97922	3.25683	FLNA;BIRC5;CLASP1
regulation of cellular component movement (GO:0051270)	3/47	0.192913	1	1.97922	3.25683	INPP5F;ACTN1;ZSWIM6
regulation of heart contraction (GO:0008016)	5/96	0.19812	1	1.61499	2.61447	TPM1;ATP1B3;ATP2B2;ATP1A1;SRI
interleukin-1-mediated signaling pathway (GO:0070498)	5/96	0.19812	1	1.61499	2.61447	IL1RN;IRAK2;TNIP2;IL1B;MYD88
response to glucose (GO:0009749)	3/48	0.201212	1	1.93798	3.10736	XBP1;PFKL;THBS1
histone H4 acetylation (GO:0043967)	3/48	0.201212	1	1.93798	3.10736	TRRAP;YEATS4;BRCA2
cellular response to heat (GO:0034605)	3/48	0.201212	1	1.93798	3.10736	THBS1;HSPA1B;HSPA1A
positive regulation of growth (GO:0045927)	4/72	0.20256	1	1.72265	2.75059	SDCBP;S100A9;S100A8;CXCL16
regulation of voltage-gated calcium channel activity (GO:1901385)	2/26	0.204055	1	2.38521	3.79097	GPR35;SRI
regulation of spindle assembly (GO:0090169)	2/26	0.204055	1	2.38521	3.79097	HSPA1B;HSPA1A
positive regulation of phosphatidylinositol 3-kinase activity (GO:0043552)	2/26	0.204055	1	2.38521	3.79097	PDGFB;FPR2
glial cell differentiation (GO:0010001)	2/26	0.204055	1	2.38521	3.79097	STAT3;SOX11
nucleotide-binding domain, leucine rich repeat containing receptor signaling pathway (GO:0035872)	2/26	0.204055	1	2.38521	3.79097	CASP8;IRAK2
potassium ion homeostasis (GO:0055075)	2/26	0.204055	1	2.38521	3.79097	ATP1B3;ATP1A1
prostaglandin metabolic process (GO:0006693)	2/26	0.204055	1	2.38521	3.79097	EDN1;MIF
regulation of DNA damage response, signal transduction by p53 class mediator (GO:0043516)	2/26	0.204055	1	2.38521	3.79097	MIF;CD44
response to alcohol (GO:0097305)	2/26	0.204055	1	2.38521	3.79097	CCL3;CCR5
negative regulation of cellular protein localization (GO:1903828)	2/26	0.204055	1	2.38521	3.79097	TAX1BP3;LILRB4
long-chain fatty-acyl-CoA metabolic process (GO:0035336)	2/26	0.204055	1	2.38521	3.79097	FAR1;HSD17B12
positive regulation of Rho protein signal transduction (GO:0035025)	2/26	0.204055	1	2.38521	3.79097	GPR35;F2R
peptidyl-tyrosine dephosphorylation (GO:0035335)	2/26	0.204055	1	2.38521	3.79097	PTPN1;DUSP6
positive regulation of embryonic development (GO:0040019)	2/26	0.204055	1	2.38521	3.79097	CLASP1;FAM129B
regulation of cyclic nucleotide metabolic process (GO:0030799)	1/7	0.205073	1	4.42968	7.01834	THBS1
substrate-dependent cell migration, cell extension (GO:0006930)	1/7	0.205073	1	4.42968	7.01834	SDCBP
negative regulation of mitochondrial outer membrane permeabilization involved in apoptotic signaling pathway (GO:1901029)	1/7	0.205073	1	4.42968	7.01834	HSPA1A
positive regulation of epithelial cell proliferation involved in wound healing (GO:0060054)	1/7	0.205073	1	4.42968	7.01834	MMP12
cellular response to interleukin-18 (GO:0071351)	1/7	0.205073	1	4.42968	7.01834	PDGFB
negative regulation of leukocyte migration (GO:0002686)	1/7	0.205073	1	4.42968	7.01834	CD300A
positive regulation of lipid transport (GO:0032370)	1/7	0.205073	1	4.42968	7.01834	SPP1
regulation of chromatin assembly or disassembly (GO:0001672)	1/7	0.205073	1	4.42968	7.01834	TAL1
negative regulation of MyD88-independent toll-like receptor signaling pathway (GO:0034128)	1/7	0.205073	1	4.42968	7.01834	CD14
negative regulation of glial cell apoptotic process (GO:0034351)	1/7	0.205073	1	4.42968	7.01834	CCL2
brown fat cell differentiation (GO:0050873)	1/7	0.205073	1	4.42968	7.01834	METRNL
regulation of endocytic recycling (GO:2001135)	1/7	0.205073	1	4.42968	7.01834	INPP5F
regulation of dendritic spine maintenance (GO:1902950)	1/7	0.205073	1	4.42968	7.01834	FCGR2B
hemostasis (GO:0007599)	1/7	0.205073	1	4.42968	7.01834	NFE2
radial glial cell differentiation (GO:0060019)	1/7	0.205073	1	4.42968	7.01834	STAT3
elastic fiber assembly (GO:0048251)	1/7	0.205073	1	4.42968	7.01834	ATP7A
cellular response to laminar fluid shear stress (GO:0071499)	1/7	0.205073	1	4.42968	7.01834	ASS1
positive regulation of cellular senescence (GO:2000774)	1/7	0.205073	1	4.42968	7.01834	ARG2
positive regulation of extracellular matrix disassembly (GO:0090091)	1/7	0.205073	1	4.42968	7.01834	CLASP1
posttranslational protein targeting to endoplasmic reticulum membrane (GO:0006620)	1/7	0.205073	1	4.42968	7.01834	SEC63
death-inducing signaling complex assembly (GO:0071550)	1/7	0.205073	1	4.42968	7.01834	CASP8
pteridine-containing compound biosynthetic process (GO:0042559)	1/7	0.205073	1	4.42968	7.01834	GCH1
cellular response to leptin stimulus (GO:0044320)	1/7	0.205073	1	4.42968	7.01834	STAT3
L-alanine transport (GO:0015808)	1/7	0.205073	1	4.42968	7.01834	SLC1A4
regulation of T-helper 1 cell differentiation (GO:0045625)	1/7	0.205073	1	4.42968	7.01834	CD80
negative regulation of dendrite morphogenesis (GO:0050774)	1/7	0.205073	1	4.42968	7.01834	YWHAH
chitin metabolic process (GO:0006030)	1/7	0.205073	1	4.42968	7.01834	CHI3L1
negative regulation of platelet-derived growth factor receptor-beta signaling pathway (GO:2000587)	1/7	0.205073	1	4.42968	7.01834	PDGFB
negative regulation of calcium ion import (GO:0090281)	1/7	0.205073	1	4.42968	7.01834	SLN
positive regulation of B cell differentiation (GO:0045579)	1/7	0.205073	1	4.42968	7.01834	XBP1
norepinephrine biosynthetic process (GO:0042421)	1/7	0.205073	1	4.42968	7.01834	MOXD1
establishment of protein localization to peroxisome (GO:0072663)	1/7	0.205073	1	4.42968	7.01834	PEX12
positive regulation of macrophage migration (GO:1905523)	1/7	0.205073	1	4.42968	7.01834	THBS1
attachment of GPI anchor to protein (GO:0016255)	1/7	0.205073	1	4.42968	7.01834	PLAUR
regulation of atrial cardiac muscle cell membrane repolarization (GO:0060372)	1/7	0.205073	1	4.42968	7.01834	FLNA
regulation of interleukin-23 production (GO:0032667)	1/7	0.205073	1	4.42968	7.01834	MYD88
cellular lipid biosynthetic process (GO:0097384)	1/7	0.205073	1	4.42968	7.01834	FAR1
regulation of high voltage-gated calcium channel activity (GO:1901841)	1/7	0.205073	1	4.42968	7.01834	SRI
positive regulation of protein kinase A signaling (GO:0010739)	1/7	0.205073	1	4.42968	7.01834	MIF
granulocyte migration (GO:0097530)	1/7	0.205073	1	4.42968	7.01834	CCL3
negative regulation of macrophage activation (GO:0043031)	1/7	0.205073	1	4.42968	7.01834	FCGR2B
regulation of dendritic cell differentiation (GO:2001198)	1/7	0.205073	1	4.42968	7.01834	FCGR2B
negative regulation of receptor internalization (GO:0002091)	1/7	0.205073	1	4.42968	7.01834	SDCBP
negative regulation of alpha-beta T cell activation (GO:0046636)	1/7	0.205073	1	4.42968	7.01834	CD300A
negative regulation of B cell apoptotic process (GO:0002903)	1/7	0.205073	1	4.42968	7.01834	BCL10
negative regulation of axon regeneration (GO:0048681)	1/7	0.205073	1	4.42968	7.01834	INPP5F
V(D)J recombination (GO:0033151)	1/7	0.205073	1	4.42968	7.01834	TCF3
activation of signaling protein activity involved in unfolded protein response (GO:0006987)	1/7	0.205073	1	4.42968	7.01834	PTPN1
regulation of norepinephrine secretion (GO:0014061)	1/7	0.205073	1	4.42968	7.01834	ADRA2A
negative regulation of transporter activity (GO:0032410)	1/7	0.205073	1	4.42968	7.01834	CTTNBP2NL
regulation of NADP metabolic process (GO:1902031)	1/7	0.205073	1	4.42968	7.01834	PGAM1
hyaluronan biosynthetic process (GO:0030213)	1/7	0.205073	1	4.42968	7.01834	IL1B
regulation of anion transport (GO:0044070)	1/7	0.205073	1	4.42968	7.01834	STC1
forebrain neuron differentiation (GO:0021879)	1/7	0.205073	1	4.42968	7.01834	INHBA
noradrenergic neuron differentiation (GO:0003357)	1/7	0.205073	1	4.42968	7.01834	SOX11
regulation of activation of Janus kinase activity (GO:0010533)	1/7	0.205073	1	4.42968	7.01834	CD300A
regulation of calcidiol 1-monooxygenase activity (GO:0060558)	1/7	0.205073	1	4.42968	7.01834	IL1B
positive regulation of macrophage chemotaxis (GO:0010759)	1/7	0.205073	1	4.42968	7.01834	THBS1
fructose 1,6-bisphosphate metabolic process (GO:0030388)	1/7	0.205073	1	4.42968	7.01834	PFKL
cleavage furrow formation (GO:0036089)	1/7	0.205073	1	4.42968	7.01834	SNX18
regulation of skeletal muscle fiber development (GO:0048742)	1/7	0.205073	1	4.42968	7.01834	FAM129B
response to increased oxygen levels (GO:0036296)	1/7	0.205073	1	4.42968	7.01834	ATP6V1A
sensory organ morphogenesis (GO:0090596)	1/7	0.205073	1	4.42968	7.01834	COL5A2
chitin catabolic process (GO:0006032)	1/7	0.205073	1	4.42968	7.01834	CHI3L1
negative regulation of necrotic cell death (GO:0060547)	1/7	0.205073	1	4.42968	7.01834	YBX3
negative regulation of dendrite development (GO:2000171)	1/7	0.205073	1	4.42968	7.01834	YWHAH
regulation of transcription involved in cell fate commitment (GO:0060850)	1/7	0.205073	1	4.42968	7.01834	CEBPB
calcitonin family receptor signaling pathway (GO:0097646)	1/7	0.205073	1	4.42968	7.01834	ADM
negative regulation of heart rate (GO:0010459)	1/7	0.205073	1	4.42968	7.01834	SRI
hyperosmotic response (GO:0006972)	1/7	0.205073	1	4.42968	7.01834	YBX3
microglial cell activation (GO:0001774)	1/7	0.205073	1	4.42968	7.01834	FPR2
chondroitin sulfate proteoglycan metabolic process (GO:0050654)	1/7	0.205073	1	4.42968	7.01834	CSGALNACT1
negative regulation of signal transduction (GO:0009968)	12/284	0.208269	1	1.31019	2.05558	SOCS3;PTPRE;PTPN1;EGFL7;IL1B;DDIT4;PLEK;TAX1BP3;SULF1;THBS1;EPHB4;FAM129B
negative regulation of cell cycle (GO:0045786)	4/73	0.209285	1	1.69905	2.65742	BTG1;INHBA;SIPA1;RHOB
intrinsic apoptotic signaling pathway in response to DNA damage (GO:0008630)	3/49	0.209593	1	1.89843	2.96647	BCL2L11;DDIT4;BCL3
amino acid transport (GO:0006865)	3/49	0.209593	1	1.89843	2.96647	SLC7A7;SLC1A4;SLC7A11
positive regulation of programmed cell death (GO:0043068)	11/258	0.212982	1	1.32204	2.04459	ABR;BNIP3L;BCL2L11;PLEKHG2;ITGA6;BCL10;BID;DUSP6;ARHGEF5;KNG1;RHOB
sodium ion homeostasis (GO:0055078)	2/27	0.215977	1	2.29687	3.52015	ATP1B3;ATP1A1
regulation of transcription regulatory region DNA binding (GO:2000677)	2/27	0.215977	1	2.29687	3.52015	SOX11;FAM129B
positive regulation of granulocyte chemotaxis (GO:0071624)	2/27	0.215977	1	2.29687	3.52015	CXCL1;CXCL2
negative chemotaxis (GO:0050919)	2/27	0.215977	1	2.29687	3.52015	SEMA7A;SEMA3F
regulation of cardiac muscle cell contraction (GO:0086004)	2/27	0.215977	1	2.29687	3.52015	STC1;SRI
regulation of viral entry into host cell (GO:0046596)	2/27	0.215977	1	2.29687	3.52015	IFITM1;P4HB
T cell activation involved in immune response (GO:0002286)	2/27	0.215977	1	2.29687	3.52015	SLC11A1;LCP1
regulation of protein complex assembly (GO:0043254)	4/74	0.216073	1	1.67609	2.56801	SELP;RALB;TAL1;FBLIM1
regulation of reactive oxygen species metabolic process (GO:2000377)	3/50	0.21805	1	1.86047	2.83355	CDKN1A;PDGFB;THBS1
regulation of megakaryocyte differentiation (GO:0045652)	3/50	0.21805	1	1.86047	2.83355	NFE2;THBS1;RUNX1
negative regulation of multicellular organismal process (GO:0051241)	6/126	0.221908	1	1.47656	2.22295	SLC11A1;IL1B;WWC2;F2R;STC1;BRCA2
mitotic nuclear division (GO:0140014)	4/75	0.22292	1	1.65375	2.48218	BIRC5;CDCA8;FLNA;CLASP1
protein stabilization (GO:0050821)	7/153	0.225098	1	1.41866	2.11553	CDKN1A;TNIP2;LAMP2;FLNA;ATP1B3;HSPA1B;HSPA1A
regulation of signal transduction (GO:0009966)	10/234	0.225134	1	1.32512	1.97583	PTPN1;IRAK2;CD80;RGS16;BIRC5;SULF1;EPHB4;DUSP6;RASGRP4;RUNX1
positive regulation of signal transduction (GO:0009967)	9/207	0.226126	1	1.34816	2.00426	C3;XBP1;ESM1;IL1B;CD80;STAT3;FLNA;ITGA5;SULF1
myeloid leukocyte differentiation (GO:0002573)	3/51	0.226575	1	1.82399	2.70803	CASP8;TNFRSF11A;MMP9
positive regulation of JUN kinase activity (GO:0043507)	3/51	0.226575	1	1.82399	2.70803	EDN1;TNFRSF11A;ARHGEF5
wound healing (GO:0042060)	3/51	0.226575	1	1.82399	2.70803	MMP12;SLC11A1;TPM1
negative regulation of protein ubiquitination (GO:0031397)	3/51	0.226575	1	1.82399	2.70803	ARRB2;HSPA1B;HSPA1A
regulation of calcium ion transmembrane transporter activity (GO:1901019)	2/28	0.227958	1	2.21484	3.27485	SLN;ADRA2A
regulation of intracellular steroid hormone receptor signaling pathway (GO:0033143)	2/28	0.227958	1	2.21484	3.27485	ARRB2;RUNX1
response to hexose (GO:0009746)	2/28	0.227958	1	2.21484	3.27485	PFKL;THBS1
leukocyte cell-cell adhesion (GO:0007159)	2/28	0.227958	1	2.21484	3.27485	SELP;PECAM1
modulation by host of viral transcription (GO:0043921)	2/28	0.227958	1	2.21484	3.27485	CCL4;CCL3
transition metal ion transport (GO:0000041)	2/28	0.227958	1	2.21484	3.27485	SLC11A1;ATP7A
extrinsic apoptotic signaling pathway via death domain receptors (GO:0008625)	2/28	0.227958	1	2.21484	3.27485	CASP8;BID
cellular response to topologically incorrect protein (GO:0035967)	2/28	0.227958	1	2.21484	3.27485	HSPA1B;HSPA1A
retinoid metabolic process (GO:0001523)	4/76	0.229823	1	1.63199	2.39975	SDC4;RDH12;ALDH1A2;SDC1
regulation of defense response (GO:0031347)	4/76	0.229823	1	1.63199	2.39975	SEMA7A;CASP4;FCGR2B;MYD88
protein insertion into mitochondrial membrane (GO:0051204)	1/8	0.230718	1	3.87597	5.68433	BCL2L11
peptidyl-cysteine modification (GO:0018198)	1/8	0.230718	1	3.87597	5.68433	S100A8
phosphate ion transmembrane transport (GO:0035435)	1/8	0.230718	1	3.87597	5.68433	SLC37A1
positive regulation of macrophage differentiation (GO:0045651)	1/8	0.230718	1	3.87597	5.68433	CASP8
neuron projection extension involved in neuron projection guidance (GO:1902284)	1/8	0.230718	1	3.87597	5.68433	SEMA3F
positive regulation of extracellular matrix assembly (GO:1901203)	1/8	0.230718	1	3.87597	5.68433	CLASP1
cell migration involved in heart development (GO:0060973)	1/8	0.230718	1	3.87597	5.68433	DCHS1
cellular response to nitric oxide (GO:0071732)	1/8	0.230718	1	3.87597	5.68433	MMP3
regulation of brown fat cell differentiation (GO:0090335)	1/8	0.230718	1	3.87597	5.68433	METRNL
stress-induced premature senescence (GO:0090400)	1/8	0.230718	1	3.87597	5.68433	CDKN1A
4-hydroxyproline metabolic process (GO:0019471)	1/8	0.230718	1	3.87597	5.68433	P4HB
interleukin-18-mediated signaling pathway (GO:0035655)	1/8	0.230718	1	3.87597	5.68433	PDGFB
regulation of chaperone-mediated autophagy (GO:1904714)	1/8	0.230718	1	3.87597	5.68433	PLK3
myelin maintenance (GO:0043217)	1/8	0.230718	1	3.87597	5.68433	CXCR4
negative regulation of interleukin-1 production (GO:0032692)	1/8	0.230718	1	3.87597	5.68433	MEFV
response to magnesium ion (GO:0032026)	1/8	0.230718	1	3.87597	5.68433	THBS1
glomerular visceral epithelial cell development (GO:0072015)	1/8	0.230718	1	3.87597	5.68433	IQGAP1
phenol-containing compound biosynthetic process (GO:0046189)	1/8	0.230718	1	3.87597	5.68433	MOXD1
negative regulation of anion transmembrane transport (GO:1903960)	1/8	0.230718	1	3.87597	5.68433	THBS1
T-helper 17 cell differentiation (GO:0072539)	1/8	0.230718	1	3.87597	5.68433	STAT3
development of primary female sexual characteristics (GO:0046545)	1/8	0.230718	1	3.87597	5.68433	LHFPL2
negative regulation of lipase activity (GO:0060192)	1/8	0.230718	1	3.87597	5.68433	ANGPTL4
positive regulation of interleukin-8 biosynthetic process (GO:0045416)	1/8	0.230718	1	3.87597	5.68433	BCL10
positive regulation of transforming growth factor beta production (GO:0071636)	1/8	0.230718	1	3.87597	5.68433	THBS1
regulation of PERK-mediated unfolded protein response (GO:1903897)	1/8	0.230718	1	3.87597	5.68433	PTPN1
regulation of T cell mediated immunity (GO:0002709)	1/8	0.230718	1	3.87597	5.68433	IL1B
imidazole-containing compound catabolic process (GO:0052805)	1/8	0.230718	1	3.87597	5.68433	HDC
negative regulation of protein complex disassembly (GO:0043242)	1/8	0.230718	1	3.87597	5.68433	SLN
regulation of ATP biosynthetic process (GO:2001169)	1/8	0.230718	1	3.87597	5.68433	ENO1
cellular response to UV-B (GO:0071493)	1/8	0.230718	1	3.87597	5.68433	CDKN1A
regulation of MyD88-independent toll-like receptor signaling pathway (GO:0034127)	1/8	0.230718	1	3.87597	5.68433	CD14
axon extension involved in axon guidance (GO:0048846)	1/8	0.230718	1	3.87597	5.68433	SEMA3F
glycerolipid biosynthetic process (GO:0045017)	1/8	0.230718	1	3.87597	5.68433	FAR1
plasma membrane to endosome transport (GO:0048227)	1/8	0.230718	1	3.87597	5.68433	USP6NL
positive regulation of spindle checkpoint (GO:0090232)	1/8	0.230718	1	3.87597	5.68433	NDRG1
T-helper cell lineage commitment (GO:0002295)	1/8	0.230718	1	3.87597	5.68433	STAT3
peptidyl-lysine hydroxylation (GO:0017185)	1/8	0.230718	1	3.87597	5.68433	PLOD2
regulation of positive chemotaxis (GO:0050926)	1/8	0.230718	1	3.87597	5.68433	ANGPT2
dimeric G-protein coupled receptor signaling pathway (GO:0038042)	1/8	0.230718	1	3.87597	5.68433	ADM
positive regulation of metanephros development (GO:0072216)	1/8	0.230718	1	3.87597	5.68433	PDGFB
lung epithelium development (GO:0060428)	1/8	0.230718	1	3.87597	5.68433	ERRFI1
regulation of chemokine secretion (GO:0090196)	1/8	0.230718	1	3.87597	5.68433	IL33
kinetochore assembly (GO:0051382)	1/8	0.230718	1	3.87597	5.68433	CENPT
negative regulation of hippo signaling (GO:0035331)	1/8	0.230718	1	3.87597	5.68433	WWC2
positive regulation of tumor necrosis factor biosynthetic process (GO:0042535)	1/8	0.230718	1	3.87597	5.68433	THBS1
histidine catabolic process (GO:0006548)	1/8	0.230718	1	3.87597	5.68433	HDC
ketone biosynthetic process (GO:0042181)	1/8	0.230718	1	3.87597	5.68433	ADM
angiogenesis involved in wound healing (GO:0060055)	1/8	0.230718	1	3.87597	5.68433	MCAM
B cell mediated immunity (GO:0019724)	1/8	0.230718	1	3.87597	5.68433	FCGR2B
positive regulation of regulatory T cell differentiation (GO:0045591)	1/8	0.230718	1	3.87597	5.68433	LILRB4
positive regulation of monocyte differentiation (GO:0045657)	1/8	0.230718	1	3.87597	5.68433	ZFP36L1
exocrine system development (GO:0035272)	1/8	0.230718	1	3.87597	5.68433	IGSF3
histidine metabolic process (GO:0006547)	1/8	0.230718	1	3.87597	5.68433	HDC
catecholamine catabolic process (GO:0042424)	1/8	0.230718	1	3.87597	5.68433	MOXD1
cardiac muscle hypertrophy (GO:0003300)	1/8	0.230718	1	3.87597	5.68433	INPP5F
leptin-mediated signaling pathway (GO:0033210)	1/8	0.230718	1	3.87597	5.68433	STAT3
pyrimidine nucleobase metabolic process (GO:0006206)	1/8	0.230718	1	3.87597	5.68433	UCK2
negative regulation of neuron projection regeneration (GO:0070571)	1/8	0.230718	1	3.87597	5.68433	INPP5F
glomerular epithelial cell development (GO:0072310)	1/8	0.230718	1	3.87597	5.68433	IQGAP1
granulocyte differentiation (GO:0030851)	1/8	0.230718	1	3.87597	5.68433	TAL1
positive regulation of mitochondrial membrane permeability involved in apoptotic process (GO:1902110)	1/8	0.230718	1	3.87597	5.68433	BNIP3L
peroxisomal transport (GO:0043574)	1/8	0.230718	1	3.87597	5.68433	PEX12
positive regulation of chromatin silencing (GO:0031937)	1/8	0.230718	1	3.87597	5.68433	MIER1
positive regulation of chemokine secretion (GO:0090197)	1/8	0.230718	1	3.87597	5.68433	IL33
osteoblast development (GO:0002076)	1/8	0.230718	1	3.87597	5.68433	CLEC5A
positive regulation of viral entry into host cell (GO:0046598)	1/8	0.230718	1	3.87597	5.68433	P4HB
mammary gland epithelial cell differentiation (GO:0060644)	1/8	0.230718	1	3.87597	5.68433	ID2
immunoglobulin mediated immune response (GO:0016064)	1/8	0.230718	1	3.87597	5.68433	FCGR2B
response to leptin (GO:0044321)	1/8	0.230718	1	3.87597	5.68433	STAT3
regulation of keratinocyte migration (GO:0051547)	1/8	0.230718	1	3.87597	5.68433	MMP9
regulation of receptor binding (GO:1900120)	1/8	0.230718	1	3.87597	5.68433	MMP9
succinate metabolic process (GO:0006105)	1/8	0.230718	1	3.87597	5.68433	GAD1
response to vitamin D (GO:0033280)	1/8	0.230718	1	3.87597	5.68433	SPP1
vesicle organization (GO:0016050)	6/128	0.232372	1	1.45349	2.12124	SRGN;PI4K2B;SNX18;SNAP23;CORO1A;STX11
peptidyl-tyrosine modification (GO:0018212)	3/52	0.235163	1	1.78891	2.58941	TPST2;ZAP70;PDGFB
carboxylic acid transport (GO:0046942)	3/52	0.235163	1	1.78891	2.58941	SLC7A7;SLC1A4;SLC7A11
positive regulation of mitochondrion organization (GO:0010822)	6/129	0.237662	1	1.44222	2.07234	UGCG;BCL2L11;PLAUR;MICALL2;BID;MMP9
negative regulation of endocytosis (GO:0045806)	2/29	0.239983	1	2.13847	3.05199	LGALS3;FCGR2B
neuron projection extension (GO:1990138)	2/29	0.239983	1	2.13847	3.05199	IQGAP1;SEMA3F
acute inflammatory response (GO:0002526)	2/29	0.239983	1	2.13847	3.05199	CEBPB;SAA1
negative regulation of response to DNA damage stimulus (GO:2001021)	2/29	0.239983	1	2.13847	3.05199	MIF;CD44
regulation of receptor internalization (GO:0002090)	2/29	0.239983	1	2.13847	3.05199	SDCBP;ARRB2
chondrocyte differentiation (GO:0002062)	2/29	0.239983	1	2.13847	3.05199	SULF1;RUNX1
positive regulation of cytosolic calcium ion concentration involved in phospholipase C-activating G-protein coupled signaling pathway (GO:0051482)	2/29	0.239983	1	2.13847	3.05199	GPR35;F2R
positive regulation of calcium-mediated signaling (GO:0050850)	2/29	0.239983	1	2.13847	3.05199	CCL4;CCL3
neural crest cell migration (GO:0001755)	2/29	0.239983	1	2.13847	3.05199	SEMA7A;SEMA3F
dopamine receptor signaling pathway (GO:0007212)	2/29	0.239983	1	2.13847	3.05199	FLNA;ARRB2
nucleotide-binding oligomerization domain containing signaling pathway (GO:0070423)	2/29	0.239983	1	2.13847	3.05199	CASP8;IRAK2
bicellular tight junction assembly (GO:0070830)	2/29	0.239983	1	2.13847	3.05199	MICALL2;F11R
positive regulation of cytoskeleton organization (GO:0051495)	4/78	0.243783	1	1.59014	2.24445	EDN1;CDC42EP4;PLEK;SYNPO
plasma membrane bounded cell projection morphogenesis (GO:0120039)	3/53	0.243807	1	1.75516	2.47719	CNTNAP2;ATP7A;MAP4K4
positive regulation of nervous system development (GO:0051962)	3/53	0.243807	1	1.75516	2.47719	CDC20;SRPX2;SOX11
generation of neurons (GO:0048699)	6/131	0.248348	1	1.4202	1.97823	ID2;DDIT4;SOX11;ATP2B2;LRP12;RUNX1
negative regulation of inflammatory response (GO:0050728)	4/79	0.250833	1	1.57001	2.17128	C1QTNF3;SAA1;METRNL;MEFV
keratan sulfate biosynthetic process (GO:0018146)	2/30	0.252037	1	2.06718	2.84895	B4GALT3;CHST2
TRIF-dependent toll-like receptor signaling pathway (GO:0035666)	2/30	0.252037	1	2.06718	2.84895	CASP8;CD14
negative regulation of Notch signaling pathway (GO:0045746)	2/30	0.252037	1	2.06718	2.84895	EGFL7;FAM129B
regulation of embryonic development (GO:0045995)	2/30	0.252037	1	2.06718	2.84895	CLASP1;FAM129B
regulation of neutrophil chemotaxis (GO:0090022)	2/30	0.252037	1	2.06718	2.84895	CXCL1;CXCL2
positive regulation of interleukin-1 secretion (GO:0050716)	2/30	0.252037	1	2.06718	2.84895	CCL3;SAA1
amino acid transmembrane transport (GO:0003333)	2/30	0.252037	1	2.06718	2.84895	SLC7A7;SLC7A11
carbohydrate derivative biosynthetic process (GO:1901137)	2/30	0.252037	1	2.06718	2.84895	B3GNT5;GCNT1
regulation of myoblast differentiation (GO:0045661)	2/30	0.252037	1	2.06718	2.84895	BTG1;ZFP36L1
positive regulation of phosphatidylinositol 3-kinase signaling (GO:0014068)	3/54	0.2525	1	1.72265	2.37096	SELP;F2R;PDGFB
positive regulation of tyrosine phosphorylation of STAT protein (GO:0042531)	3/54	0.2525	1	1.72265	2.37096	SOCS3;STAT3;OSM
regulation of immunoglobulin secretion (GO:0051023)	1/9	0.255537	1	3.44531	4.70073	XBP1
removal of superoxide radicals (GO:0019430)	1/9	0.255537	1	3.44531	4.70073	ATP7A
alanine transport (GO:0032328)	1/9	0.255537	1	3.44531	4.70073	SLC1A4
negative regulation of leukocyte chemotaxis (GO:0002689)	1/9	0.255537	1	3.44531	4.70073	MIF
negative regulation of cytokine production involved in inflammatory response (GO:1900016)	1/9	0.255537	1	3.44531	4.70073	MEFV
L-fucose metabolic process (GO:0042354)	1/9	0.255537	1	3.44531	4.70073	FUT4
manganese ion transport (GO:0006828)	1/9	0.255537	1	3.44531	4.70073	SLC11A1
positive regulation of production of molecular mediator of immune response (GO:0002702)	1/9	0.255537	1	3.44531	4.70073	XBP1
response to UV-C (GO:0010225)	1/9	0.255537	1	3.44531	4.70073	BCL3
regulation of macrophage cytokine production (GO:0010935)	1/9	0.255537	1	3.44531	4.70073	SEMA7A
positive regulation of protein maturation (GO:1903319)	1/9	0.255537	1	3.44531	4.70073	ADAM8
actin filament reorganization (GO:0090527)	1/9	0.255537	1	3.44531	4.70073	NEDD9
poly-N-acetyllactosamine biosynthetic process (GO:0030311)	1/9	0.255537	1	3.44531	4.70073	B3GNT5
neuronal ion channel clustering (GO:0045161)	1/9	0.255537	1	3.44531	4.70073	CNTNAP2
regulation of amyloid precursor protein biosynthetic process (GO:0042984)	1/9	0.255537	1	3.44531	4.70073	SOAT1
regulation of interleukin-1 secretion (GO:0050704)	1/9	0.255537	1	3.44531	4.70073	SAA1
regulation of T-helper 1 type immune response (GO:0002825)	1/9	0.255537	1	3.44531	4.70073	SLC11A1
cellular response to reactive nitrogen species (GO:1902170)	1/9	0.255537	1	3.44531	4.70073	MMP3
regulation of endothelial cell differentiation (GO:0045601)	1/9	0.255537	1	3.44531	4.70073	BTG1
regulation of mast cell activation involved in immune response (GO:0033006)	1/9	0.255537	1	3.44531	4.70073	CD300A
mature B cell differentiation involved in immune response (GO:0002313)	1/9	0.255537	1	3.44531	4.70073	FCGR2B
positive regulation of synapse maturation (GO:0090129)	1/9	0.255537	1	3.44531	4.70073	CDC20
positive regulation of nitric-oxide synthase biosynthetic process (GO:0051770)	1/9	0.255537	1	3.44531	4.70073	CCL2
neurotrophin TRK receptor signaling pathway (GO:0048011)	1/9	0.255537	1	3.44531	4.70073	DDIT4
L-fucose catabolic process (GO:0042355)	1/9	0.255537	1	3.44531	4.70073	FUT4
phagolysosome assembly (GO:0001845)	1/9	0.255537	1	3.44531	4.70073	CORO1A
adipose tissue development (GO:0060612)	1/9	0.255537	1	3.44531	4.70073	XBP1
negative regulation of natural killer cell mediated cytotoxicity (GO:0045953)	1/9	0.255537	1	3.44531	4.70073	ARRB2
positive regulation of immunoglobulin secretion (GO:0051024)	1/9	0.255537	1	3.44531	4.70073	XBP1
regulation of platelet-derived growth factor receptor-beta signaling pathway (GO:2000586)	1/9	0.255537	1	3.44531	4.70073	PDGFB
central nervous system neuron development (GO:0021954)	1/9	0.255537	1	3.44531	4.70073	ATP7A
regulation of endoplasmic reticulum unfolded protein response (GO:1900101)	1/9	0.255537	1	3.44531	4.70073	XBP1
cell junction maintenance (GO:0034331)	1/9	0.255537	1	3.44531	4.70073	F2R
negative regulation of fibrinolysis (GO:0051918)	1/9	0.255537	1	3.44531	4.70073	THBS1
columnar/cuboidal epithelial cell differentiation (GO:0002065)	1/9	0.255537	1	3.44531	4.70073	SOX11
cellular response to oxygen levels (GO:0071453)	1/9	0.255537	1	3.44531	4.70073	ATP6V1A
peptidyl-amino acid modification (GO:0018193)	1/9	0.255537	1	3.44531	4.70073	ATP7A
positive regulation of autophagosome assembly (GO:2000786)	1/9	0.255537	1	3.44531	4.70073	RALB
negative regulation of histone methylation (GO:0031061)	1/9	0.255537	1	3.44531	4.70073	MTF2
oogenesis (GO:0048477)	1/9	0.255537	1	3.44531	4.70073	PIWIL2
negative regulation of alcohol biosynthetic process (GO:1902931)	1/9	0.255537	1	3.44531	4.70073	PLEK
negative regulation of heterotypic cell-cell adhesion (GO:0034115)	1/9	0.255537	1	3.44531	4.70073	IL1RN
regulation of cell-cell adhesion involved in gastrulation (GO:0070587)	1/9	0.255537	1	3.44531	4.70073	IL1RN
engulfment of apoptotic cell (GO:0043652)	1/9	0.255537	1	3.44531	4.70073	THBS1
cellular response to superoxide (GO:0071451)	1/9	0.255537	1	3.44531	4.70073	ATP7A
flavonoid glucuronidation (GO:0052696)	1/9	0.255537	1	3.44531	4.70073	UGT1A10
regulation of leukocyte activation (GO:0002694)	1/9	0.255537	1	3.44531	4.70073	MIF
fucose catabolic process (GO:0019317)	1/9	0.255537	1	3.44531	4.70073	FUT4
glucose import (GO:0046323)	1/9	0.255537	1	3.44531	4.70073	SLC2A6
ether lipid metabolic process (GO:0046485)	1/9	0.255537	1	3.44531	4.70073	FAR1
potassium ion import across plasma membrane (GO:1990573)	1/9	0.255537	1	3.44531	4.70073	ATP1A1
positive regulation of cytokine production involved in inflammatory response (GO:1900017)	1/9	0.255537	1	3.44531	4.70073	MYD88
regulation of oxidative phosphorylation (GO:0002082)	1/9	0.255537	1	3.44531	4.70073	ATP7A
regulation of cell communication by electrical coupling involved in cardiac conduction (GO:1901844)	1/9	0.255537	1	3.44531	4.70073	SRI
mitral valve morphogenesis (GO:0003183)	1/9	0.255537	1	3.44531	4.70073	DCHS1
T cell mediated immunity (GO:0002456)	1/9	0.255537	1	3.44531	4.70073	SLC11A1
proline transport (GO:0015824)	1/9	0.255537	1	3.44531	4.70073	SLC1A4
positive regulation of vascular endothelial cell proliferation (GO:1905564)	1/9	0.255537	1	3.44531	4.70073	AKT3
proton-transporting V-type ATPase complex assembly (GO:0070070)	1/9	0.255537	1	3.44531	4.70073	TCIRG1
fatty acid homeostasis (GO:0055089)	1/9	0.255537	1	3.44531	4.70073	XBP1
cytoskeletal anchoring at plasma membrane (GO:0007016)	1/9	0.255537	1	3.44531	4.70073	FLNB
Golgi inheritance (GO:0048313)	1/9	0.255537	1	3.44531	4.70073	PLK3
response to vitamin (GO:0033273)	1/9	0.255537	1	3.44531	4.70073	SPP1
regulation of transforming growth factor beta receptor signaling pathway (GO:0017015)	4/80	0.257926	1	1.55039	2.10091	SDCBP;SOX11;THBS1;HSPA1A
cellular response to nutrient levels (GO:0031669)	3/55	0.261238	1	1.69133	2.27032	XBP1;RALB;LAMP2
positive regulation of immune response (GO:0050778)	3/55	0.261238	1	1.69133	2.27032	XBP1;ADAM8;FCGR2B
positive regulation of response to stimulus (GO:0048584)	3/55	0.261238	1	1.69133	2.27032	ARG2;CD80;FCGR2B
glycosphingolipid metabolic process (GO:0006687)	3/55	0.261238	1	1.69133	2.27032	UGCG;GM2A;B4GALNT1
negative regulation of endothelial cell proliferation (GO:0001937)	2/31	0.264105	1	2.0005	2.66349	SULF1;THBS1
beta-catenin-TCF complex assembly (GO:1904837)	2/31	0.264105	1	2.0005	2.66349	TRRAP;TCF7
bile acid and bile salt transport (GO:0015721)	2/31	0.264105	1	2.0005	2.66349	ABCC3;SLC10A4
regulation of leukocyte chemotaxis (GO:0002688)	2/31	0.264105	1	2.0005	2.66349	CXCL1;CXCL2
negative regulation of secretion by cell (GO:1903531)	2/31	0.264105	1	2.0005	2.66349	IL11;OSM
activation of protein kinase B activity (GO:0032148)	2/31	0.264105	1	2.0005	2.66349	PDGFB;ADRA2A
'de novo' posttranslational protein folding (GO:0051084)	2/31	0.264105	1	2.0005	2.66349	HSPA1B;HSPA1A
MyD88-independent toll-like receptor signaling pathway (GO:0002756)	2/31	0.264105	1	2.0005	2.66349	CASP8;CD14
phosphatidylinositol 3-kinase signaling (GO:0014065)	2/31	0.264105	1	2.0005	2.66349	EDN1;ZFP36L1
regulation of sodium ion transmembrane transport (GO:1902305)	2/31	0.264105	1	2.0005	2.66349	FXYD5;YWHAH
regulation of phosphatidylinositol 3-kinase signaling (GO:0014066)	4/81	0.265057	1	1.53125	2.0332	SELP;F2R;PDGFB;IER3
regulation of protein serine/threonine kinase activity (GO:0071900)	4/81	0.265057	1	1.53125	2.0332	CDKN1A;RALB;SERTAD1;CDKN3
negative regulation of MAPK cascade (GO:0043409)	4/81	0.265057	1	1.53125	2.0332	PTPN1;CD300A;IL1B;DUSP6
negative regulation of defense response (GO:0031348)	4/81	0.265057	1	1.53125	2.0332	C1QTNF3;SAA1;METRNL;MEFV
receptor-mediated endocytosis (GO:0006898)	8/189	0.2665	1	1.3125	1.73562	INPP5F;SAA1;ADM;FPR2;ARRB2;FCGR2B;CXCL16;HSP90B1
regulation of response to external stimulus (GO:0032101)	5/108	0.269436	1	1.43554	1.88261	SEMA7A;F2R;CASP4;CXCR4;MYD88
negative regulation of response to external stimulus (GO:0032102)	5/108	0.269436	1	1.43554	1.88261	C1QTNF3;INPP5F;SAA1;METRNL;MEFV
regulation of protein secretion (GO:0050708)	5/108	0.269436	1	1.43554	1.88261	IL1B;SLC2A1;SAA1;ADAM8;ADRA2A
positive regulation of cysteine-type endopeptidase activity (GO:2001056)	3/56	0.270013	1	1.66113	2.17489	CASP8;F2R;MEFV
fat cell differentiation (GO:0045444)	3/56	0.270013	1	1.66113	2.17489	C1QTNF3;IL11;METRNL
positive regulation of transcription, DNA-templated (GO:0045893)	40/1121	0.27478	1	1.10643	1.42927	CIITA;CEBPB;CD80;PDGFB;FHL2;YEATS4;BCL10;BRCA2;LITAF;ETS2;FAM129B;SALL2;SPP1;JUNB;YWHAH;NFE2;IL11;IL33;XBP1;EDN1;BRPF1;SLC11A1;STAT3;F2R;OSM;SOX11;INHBA;FOSL2;NFKB2;RUNX1;MMP12;KLF6;TAL1;TNIP2;IL1B;ID2;MTF2;BCL3;ITGA6;TCF3
negative regulation of toll-like receptor signaling pathway (GO:0034122)	2/32	0.276173	1	1.93798	2.49366	CD300A;CD14
positive regulation of ubiquitin-protein transferase activity (GO:0051443)	2/32	0.276173	1	1.93798	2.49366	CDC20;ARRDC3
negative regulation of blood vessel endothelial cell migration (GO:0043537)	2/32	0.276173	1	1.93798	2.49366	ANGPT2;THBS1
negative regulation of tumor necrosis factor superfamily cytokine production (GO:1903556)	2/32	0.276173	1	1.93798	2.49366	ARG2;HAVCR2
secondary alcohol metabolic process (GO:1902652)	2/32	0.276173	1	1.93798	2.49366	SQLE;SOAT1
cellular zinc ion homeostasis (GO:0006882)	2/32	0.276173	1	1.93798	2.49366	S100A9;S100A8
liver development (GO:0001889)	2/32	0.276173	1	1.93798	2.49366	CEBPB;XBP1
gene silencing by miRNA (GO:0035195)	2/32	0.276173	1	1.93798	2.49366	ZFP36;STAT3
chromosome organization (GO:0051276)	3/57	0.278821	1	1.63199	2.08435	CENPT;CDCA8;BRCA2
positive regulation of protein transport (GO:0051222)	3/57	0.278821	1	1.63199	2.08435	PLK3;ADAM8;ARHGEF5
protein import (GO:0017038)	3/57	0.278821	1	1.63199	2.08435	MMP12;LAMP2;STAT3
ATP metabolic process (GO:0046034)	3/57	0.278821	1	1.63199	2.08435	MYH8;HSPA1B;HSPA1A
positive regulation of protein modification process (GO:0031401)	7/164	0.278881	1	1.3235	1.69007	C3;RALB;IL1B;PLAUR;FPR2;CARD14;MMP9
DNA damage response, signal transduction by p53 class mediator (GO:0030330)	4/83	0.279426	1	1.49435	1.90532	PLK3;CDKN1A;BCL3;NDRG1
negative regulation of binding (GO:0051100)	4/83	0.279426	1	1.49435	1.90532	RALB;SLN;ID2;PDGFB
positive regulation of epidermal growth factor-activated receptor activity (GO:0045741)	1/10	0.279557	1	3.10078	3.95209	ADRA2A
induction of positive chemotaxis (GO:0050930)	1/10	0.279557	1	3.10078	3.95209	PGF
regulation of synapse maturation (GO:0090128)	1/10	0.279557	1	3.10078	3.95209	CDC20
regulation of chromatin organization (GO:1902275)	1/10	0.279557	1	3.10078	3.95209	MKI67
ganglion development (GO:0061548)	1/10	0.279557	1	3.10078	3.95209	SEMA3F
vacuolar proton-transporting V-type ATPase complex assembly (GO:0070072)	1/10	0.279557	1	3.10078	3.95209	TCIRG1
cellular response to thyroid hormone stimulus (GO:0097067)	1/10	0.279557	1	3.10078	3.95209	CTSS
cellular response to growth hormone stimulus (GO:0071378)	1/10	0.279557	1	3.10078	3.95209	STAT3
amino sugar metabolic process (GO:0006040)	1/10	0.279557	1	3.10078	3.95209	CSGALNACT1
regulation of myeloid leukocyte differentiation (GO:0002761)	1/10	0.279557	1	3.10078	3.95209	CEBPB
regulation of coagulation (GO:0050818)	1/10	0.279557	1	3.10078	3.95209	F2R
adenylate cyclase-inhibiting dopamine receptor signaling pathway (GO:0007195)	1/10	0.279557	1	3.10078	3.95209	FLNA
glucosamine-containing compound catabolic process (GO:1901072)	1/10	0.279557	1	3.10078	3.95209	CHI3L1
regulation of mammary gland epithelial cell proliferation (GO:0033599)	1/10	0.279557	1	3.10078	3.95209	BRCA2
regulation of cytoplasmic translational elongation (GO:1900247)	1/10	0.279557	1	3.10078	3.95209	CPEB2
establishment of spindle localization (GO:0051293)	1/10	0.279557	1	3.10078	3.95209	CLASP1
mitotic nuclear envelope reassembly (GO:0007084)	1/10	0.279557	1	3.10078	3.95209	LMNA
positive regulation of alcohol biosynthetic process (GO:1902932)	1/10	0.279557	1	3.10078	3.95209	IL1B
positive regulation of receptor recycling (GO:0001921)	1/10	0.279557	1	3.10078	3.95209	INPP5F
response to acidic pH (GO:0010447)	1/10	0.279557	1	3.10078	3.95209	CTSS
response to laminar fluid shear stress (GO:0034616)	1/10	0.279557	1	3.10078	3.95209	ASS1
positive regulation of natural killer cell mediated cytotoxicity directed against tumor cell target (GO:0002860)	1/10	0.279557	1	3.10078	3.95209	PVR
aspartate family amino acid metabolic process (GO:0009066)	1/10	0.279557	1	3.10078	3.95209	ASS1
regulation of NLRP3 inflammasome complex assembly (GO:1900225)	1/10	0.279557	1	3.10078	3.95209	MEFV
positive regulation of glial cell differentiation (GO:0045687)	1/10	0.279557	1	3.10078	3.95209	CXCR4
cellular copper ion homeostasis (GO:0006878)	1/10	0.279557	1	3.10078	3.95209	ATP7A
neuroepithelial cell differentiation (GO:0060563)	1/10	0.279557	1	3.10078	3.95209	SOX11
astrocyte development (GO:0014002)	1/10	0.279557	1	3.10078	3.95209	FPR2
positive regulation of cardiac muscle cell differentiation (GO:2000727)	1/10	0.279557	1	3.10078	3.95209	EDN1
tryptophan metabolic process (GO:0006568)	1/10	0.279557	1	3.10078	3.95209	ATP7A
epithelial cell morphogenesis (GO:0003382)	1/10	0.279557	1	3.10078	3.95209	STC1
positive regulation of lipase activity (GO:0060193)	1/10	0.279557	1	3.10078	3.95209	RHOC
negative regulation of gluconeogenesis (GO:0045721)	1/10	0.279557	1	3.10078	3.95209	C1QTNF3
chylomicron assembly (GO:0034378)	1/10	0.279557	1	3.10078	3.95209	P4HB
positive regulation of fertilization (GO:1905516)	1/10	0.279557	1	3.10078	3.95209	LHFPL2
regulation of urine volume (GO:0035809)	1/10	0.279557	1	3.10078	3.95209	ADM
regulation of granulocyte differentiation (GO:0030852)	1/10	0.279557	1	3.10078	3.95209	RUNX1
positive regulation of T cell apoptotic process (GO:0070234)	1/10	0.279557	1	3.10078	3.95209	ADAM8
negative regulation of reproductive process (GO:2000242)	1/10	0.279557	1	3.10078	3.95209	SULF1
negative regulation of cell activation (GO:0050866)	1/10	0.279557	1	3.10078	3.95209	PDGFB
regulation of histone phosphorylation (GO:0033127)	1/10	0.279557	1	3.10078	3.95209	IL1B
cellular response to ATP (GO:0071318)	1/10	0.279557	1	3.10078	3.95209	HSP90B1
positive regulation of natural killer cell mediated immune response to tumor cell (GO:0002857)	1/10	0.279557	1	3.10078	3.95209	PVR
sympathetic ganglion development (GO:0061549)	1/10	0.279557	1	3.10078	3.95209	SEMA3F
protein-cofactor linkage (GO:0018065)	1/10	0.279557	1	3.10078	3.95209	GAD1
complement receptor mediated signaling pathway (GO:0002430)	1/10	0.279557	1	3.10078	3.95209	FPR2
ectoderm development (GO:0007398)	1/10	0.279557	1	3.10078	3.95209	ITGA6
positive regulation of smooth muscle cell migration (GO:0014911)	1/10	0.279557	1	3.10078	3.95209	PDGFB
regulation of podosome assembly (GO:0071801)	1/10	0.279557	1	3.10078	3.95209	LCP1
negative regulation of transcription from RNA polymerase II promoter in response to stress (GO:0097201)	1/10	0.279557	1	3.10078	3.95209	HSPA1A
negative regulation of embryonic development (GO:0045992)	1/10	0.279557	1	3.10078	3.95209	SULF1
glucocorticoid metabolic process (GO:0008211)	1/10	0.279557	1	3.10078	3.95209	YWHAH
regulation of mRNA 3'-end processing (GO:0031440)	1/10	0.279557	1	3.10078	3.95209	ZFP36L1
mitotic G1/S transition checkpoint (GO:0044819)	1/10	0.279557	1	3.10078	3.95209	PLK3
positive regulation of lipid localization (GO:1905954)	1/10	0.279557	1	3.10078	3.95209	C3
protein kinase A signaling (GO:0010737)	1/10	0.279557	1	3.10078	3.95209	LCP1
poly-N-acetyllactosamine metabolic process (GO:0030309)	1/10	0.279557	1	3.10078	3.95209	B3GNT5
T cell homeostasis (GO:0043029)	1/10	0.279557	1	3.10078	3.95209	TNFSF14
negative regulation of endoplasmic reticulum unfolded protein response (GO:1900102)	1/10	0.279557	1	3.10078	3.95209	PTPN1
endothelial tube morphogenesis (GO:0061154)	1/10	0.279557	1	3.10078	3.95209	RHOB
positive regulation of vacuole organization (GO:0044090)	1/10	0.279557	1	3.10078	3.95209	RALB
regulation of T cell apoptotic process (GO:0070232)	1/10	0.279557	1	3.10078	3.95209	LGALS3
regulation of axon regeneration (GO:0048679)	1/10	0.279557	1	3.10078	3.95209	INPP5F
negative regulation of glucose transport (GO:0010829)	1/10	0.279557	1	3.10078	3.95209	IL1B
positive regulation of cysteine-type endopeptidase activity involved in apoptotic process (GO:0043280)	5/110	0.281854	1	1.40944	1.78487	CASP8;F2R;CASP4;S100A9;S100A8
negative regulation of transcription from RNA polymerase II promoter (GO:0000122)	21/566	0.285277	1	1.15046	1.44302	TGIF1;PLK3;CIITA;CEBPB;EDN1;STAT3;WWC2;PDGFB;FHL2;SOX11;ENO1;LILRB4;ETS2;NFKB2;ZFP36;SALL2;YEATS2;MTF2;TCF3;JUNB;HSPA1A
positive regulation of peptidyl-serine phosphorylation (GO:0033138)	4/84	0.286656	1	1.47656	1.84492	IL11;OSM;MIF;CD44
IRE1-mediated unfolded protein response (GO:0036498)	3/58	0.287654	1	1.60385	1.99839	XBP1;LMNA;SEC63
positive regulation of cell death (GO:0010942)	3/58	0.287654	1	1.60385	1.99839	MMP3;DDIT4;FCGR2B
cellular response to peptide hormone stimulus (GO:0071375)	5/111	0.288104	1	1.39675	1.73816	XBP1;GNG8;GNG12;CPEB2;ZFP36L1
cellular response to glucagon stimulus (GO:0071377)	2/33	0.28823	1	1.87926	2.33779	GNG8;GNG12
negative regulation of receptor activity (GO:2000272)	2/33	0.28823	1	1.87926	2.33779	ERRFI1;SRI
activation of adenylate cyclase activity (GO:0007190)	2/33	0.28823	1	1.87926	2.33779	CAP1;EDNRA
positive regulation of transcription factor import into nucleus (GO:0042993)	2/33	0.28823	1	1.87926	2.33779	IL1B;FLNA
vasculogenesis (GO:0001570)	2/33	0.28823	1	1.87926	2.33779	EGFL7;ADM
regulation of mitotic cell cycle (GO:0007346)	7/166	0.289001	1	1.30756	1.6231	SDCBP;BTG1;TAL1;BIRC5;IQGAP1;MKI67;MAP4K4
activation of GTPase activity (GO:0090630)	4/85	0.293913	1	1.45919	1.78674	USP6NL;ADPRH;TBC1D9;TAX1BP3
regulation of neuron differentiation (GO:0045664)	4/85	0.293913	1	1.45919	1.78674	ID2;SOX11;TCF3;YWHAH
regulation of epidermal growth factor receptor signaling pathway (GO:0042058)	3/59	0.296509	1	1.57667	1.91672	ERRFI1;PLAUR;MMP9
cholesterol homeostasis (GO:0042632)	3/59	0.296509	1	1.57667	1.91672	XBP1;SOAT1;CYP7B1
integrin-mediated signaling pathway (GO:0007229)	3/59	0.296509	1	1.57667	1.91672	SEMA7A;PLEK;NEDD9
sterol homeostasis (GO:0055092)	3/59	0.296509	1	1.57667	1.91672	XBP1;SOAT1;CYP7B1
Ras protein signal transduction (GO:0007265)	9/224	0.298191	1	1.24585	1.5075	RASSF1;CDKN1A;CDC42EP4;ARHGAP29;TAX1BP3;RHOC;RAPGEF6;ADRA2A;RHOB
positive regulation of adenylate cyclase activity (GO:0045762)	2/34	0.300263	1	1.82399	2.19443	CAP1;EDNRA
entry into host cell (GO:0030260)	2/34	0.300263	1	1.82399	2.19443	CXCR4;CCR5
platelet aggregation (GO:0070527)	2/34	0.300263	1	1.82399	2.19443	PLEK;FLNA
embryonic organ morphogenesis (GO:0048562)	2/34	0.300263	1	1.82399	2.19443	ID2;SOX11
positive regulation of locomotion (GO:0040017)	2/34	0.300263	1	1.82399	2.19443	PDGFB;THBS1
cellular glucose homeostasis (GO:0001678)	2/34	0.300263	1	1.82399	2.19443	HK3;XBP1
regulation of interleukin-12 production (GO:0032655)	2/34	0.300263	1	1.82399	2.19443	MEFV;THBS1
positive regulation of endothelial cell apoptotic process (GO:2000353)	1/11	0.302803	1	2.81889	3.36765	THBS1
interleukin-27-mediated signaling pathway (GO:0070106)	1/11	0.302803	1	2.81889	3.36765	STAT3
endothelium development (GO:0003158)	1/11	0.302803	1	2.81889	3.36765	PECAM1
regulation of tumor necrosis factor biosynthetic process (GO:0042534)	1/11	0.302803	1	2.81889	3.36765	THBS1
drug transmembrane transport (GO:0006855)	1/11	0.302803	1	2.81889	3.36765	ABCC3
regulation of feeding behavior (GO:0060259)	1/11	0.302803	1	2.81889	3.36765	STAT3
morphogenesis of an epithelial sheet (GO:0002011)	1/11	0.302803	1	2.81889	3.36765	SOX11
negative regulation of protein localization to nucleus (GO:1900181)	1/11	0.302803	1	2.81889	3.36765	LILRB4
positive regulation of superoxide anion generation (GO:0032930)	1/11	0.302803	1	2.81889	3.36765	FPR2
regulation of lamellipodium morphogenesis (GO:2000392)	1/11	0.302803	1	2.81889	3.36765	CD44
positive regulation of extracellular matrix organization (GO:1903055)	1/11	0.302803	1	2.81889	3.36765	CLASP1
xenobiotic glucuronidation (GO:0052697)	1/11	0.302803	1	2.81889	3.36765	UGT1A10
negative regulation of leukocyte cell-cell adhesion (GO:1903038)	1/11	0.302803	1	2.81889	3.36765	ASS1
positive regulation of nuclear-transcribed mRNA poly(A) tail shortening (GO:0060213)	1/11	0.302803	1	2.81889	3.36765	ZFP36
T-helper cell differentiation (GO:0042093)	1/11	0.302803	1	2.81889	3.36765	ATP7A
pyrimidine nucleoside catabolic process (GO:0046135)	1/11	0.302803	1	2.81889	3.36765	UPP1
T cell differentiation in thymus (GO:0033077)	1/11	0.302803	1	2.81889	3.36765	ZFP36L1
positive regulation of receptor biosynthetic process (GO:0010870)	1/11	0.302803	1	2.81889	3.36765	EDN1
cell-substrate junction assembly (GO:0007044)	1/11	0.302803	1	2.81889	3.36765	ITGA6
positive regulation of tumor necrosis factor secretion (GO:1904469)	1/11	0.302803	1	2.81889	3.36765	HAVCR2
regulation of actin filament depolymerization (GO:0030834)	1/11	0.302803	1	2.81889	3.36765	PLEK
activation of cysteine-type endopeptidase activity involved in apoptotic signaling pathway (GO:0097296)	1/11	0.302803	1	2.81889	3.36765	CASP8
positive regulation of transcription from RNA polymerase II promoter in response to endoplasmic reticulum stress (GO:1990440)	1/11	0.302803	1	2.81889	3.36765	CEBPB
somite development (GO:0061053)	1/11	0.302803	1	2.81889	3.36765	SOX11
cell-cell junction maintenance (GO:0045217)	1/11	0.302803	1	2.81889	3.36765	F2R
relaxation of cardiac muscle (GO:0055119)	1/11	0.302803	1	2.81889	3.36765	ATP1A1
positive regulation of myoblast fusion (GO:1901741)	1/11	0.302803	1	2.81889	3.36765	CD53
regulation of integrin-mediated signaling pathway (GO:2001044)	1/11	0.302803	1	2.81889	3.36765	FLNA
phosphatidylinositol dephosphorylation (GO:0046856)	1/11	0.302803	1	2.81889	3.36765	INPP5F
negative regulation of myotube differentiation (GO:0010832)	1/11	0.302803	1	2.81889	3.36765	XBP1
positive regulation of actin filament depolymerization (GO:0030836)	1/11	0.302803	1	2.81889	3.36765	PLEK
negative regulation of cellular senescence (GO:2000773)	1/11	0.302803	1	2.81889	3.36765	AKT3
regulation of natural killer cell mediated cytotoxicity directed against tumor cell target (GO:0002858)	1/11	0.302803	1	2.81889	3.36765	PVR
positive regulation of glycoprotein biosynthetic process (GO:0010560)	1/11	0.302803	1	2.81889	3.36765	SOAT1
regulation of nuclear-transcribed mRNA poly(A) tail shortening (GO:0060211)	1/11	0.302803	1	2.81889	3.36765	ZFP36
negative regulation of protein localization to cell surface (GO:2000009)	1/11	0.302803	1	2.81889	3.36765	TAX1BP3
cellular response to interleukin-2 (GO:0071352)	1/11	0.302803	1	2.81889	3.36765	IL2RG
relaxation of muscle (GO:0090075)	1/11	0.302803	1	2.81889	3.36765	ATP1A1
icosanoid biosynthetic process (GO:0046456)	1/11	0.302803	1	2.81889	3.36765	ALOX5AP
progesterone metabolic process (GO:0042448)	1/11	0.302803	1	2.81889	3.36765	ADM
positive regulation of T cell receptor signaling pathway (GO:0050862)	1/11	0.302803	1	2.81889	3.36765	KCNN4
response to nitric oxide (GO:0071731)	1/11	0.302803	1	2.81889	3.36765	MMP3
negative regulation of heart contraction (GO:0045822)	1/11	0.302803	1	2.81889	3.36765	SRI
negative regulation of cardiac muscle hypertrophy (GO:0010614)	1/11	0.302803	1	2.81889	3.36765	LMNA
cellular response to increased oxygen levels (GO:0036295)	1/11	0.302803	1	2.81889	3.36765	ATP6V1A
inhibition of cysteine-type endopeptidase activity involved in apoptotic process (GO:1990001)	1/11	0.302803	1	2.81889	3.36765	BIRC5
negative regulation of release of sequestered calcium ion into cytosol (GO:0051280)	1/11	0.302803	1	2.81889	3.36765	SRI
response to thyroid hormone (GO:0097066)	1/11	0.302803	1	2.81889	3.36765	CTSS
embryonic hemopoiesis (GO:0035162)	1/11	0.302803	1	2.81889	3.36765	TAL1
hemidesmosome assembly (GO:0031581)	1/11	0.302803	1	2.81889	3.36765	ITGA6
aspartate family amino acid biosynthetic process (GO:0009067)	1/11	0.302803	1	2.81889	3.36765	PLOD2
regulation of receptor biosynthetic process (GO:0010869)	1/11	0.302803	1	2.81889	3.36765	EDN1
protein carboxylation (GO:0018214)	1/11	0.302803	1	2.81889	3.36765	F10
interleukin-35-mediated signaling pathway (GO:0070757)	1/11	0.302803	1	2.81889	3.36765	STAT3
regulation of chromatin silencing (GO:0031935)	1/11	0.302803	1	2.81889	3.36765	MIER1
response to corticosteroid (GO:0031960)	1/11	0.302803	1	2.81889	3.36765	IL1RN
regulation of blood vessel endothelial cell proliferation involved in sprouting angiogenesis (GO:1903587)	1/11	0.302803	1	2.81889	3.36765	THBS1
peptidyl-glutamic acid carboxylation (GO:0017187)	1/11	0.302803	1	2.81889	3.36765	F10
positive regulation of T-helper cell differentiation (GO:0045624)	1/11	0.302803	1	2.81889	3.36765	CD80
cardiac muscle cell membrane repolarization (GO:0099622)	1/11	0.302803	1	2.81889	3.36765	ATP1A1
spinal cord development (GO:0021510)	1/11	0.302803	1	2.81889	3.36765	SOX11
cell junction assembly (GO:0034329)	3/60	0.30538	1	1.55039	1.83907	FBLIM1;FLNA;ITGA6
sterol metabolic process (GO:0016125)	3/60	0.30538	1	1.55039	1.83907	SQLE;SOAT1;CYP7B1
epithelial tube morphogenesis (GO:0060562)	2/35	0.312261	1	1.77187	2.06231	COL4A1;RHOB
negative regulation of DNA binding (GO:0043392)	2/35	0.312261	1	1.77187	2.06231	ID2;SOX11
negative regulation of cellular metabolic process (GO:0031324)	2/35	0.312261	1	1.77187	2.06231	SDCBP;EDN1
keratan sulfate metabolic process (GO:0042339)	2/35	0.312261	1	1.77187	2.06231	B4GALT3;CHST2
positive regulation of muscle cell differentiation (GO:0051149)	2/35	0.312261	1	1.77187	2.06231	BTG1;TCF3
regulation of wound healing (GO:0061041)	2/35	0.312261	1	1.77187	2.06231	F2R;ADRA2A
positive regulation of chemokine production (GO:0032722)	2/35	0.312261	1	1.77187	2.06231	IL33;IL1B
response to glucagon (GO:0033762)	2/35	0.312261	1	1.77187	2.06231	GNG8;GNG12
response to reactive oxygen species (GO:0000302)	3/61	0.31426	1	1.52497	1.76521	PLK3;TPM1;MMP9
cell-cell adhesion via plasma-membrane adhesion molecules (GO:0098742)	6/143	0.314877	1	1.30102	1.50343	SELP;SELL;PECAM1;DCHS1;CLDN2;PVR
peptidyl-lysine modification (GO:0018205)	5/116	0.319693	1	1.33654	1.52418	INCENP;CDCA8;BIRC5;PLOD2;ATP7A
epithelium development (GO:0060429)	5/116	0.319693	1	1.33654	1.52418	ERRFI1;LGALS3;ALDH1A2;SOX11;TAGLN2
protein targeting to membrane (GO:0006612)	3/62	0.323147	1	1.50038	1.6949	SDCBP;TRAM1;SEC63
striated muscle contraction (GO:0006941)	3/62	0.323147	1	1.50038	1.6949	MYL4;TPM1;MYH8
negative regulation of cell-substrate adhesion (GO:0010812)	2/36	0.324214	1	1.72265	1.94031	GCNT2;THBS1
regulation of endothelial cell apoptotic process (GO:2000351)	2/36	0.324214	1	1.72265	1.94031	TNIP2;THBS1
erythrocyte differentiation (GO:0030218)	2/36	0.324214	1	1.72265	1.94031	TAL1;INHBA
negative regulation of epithelial cell migration (GO:0010633)	2/36	0.324214	1	1.72265	1.94031	STC1;THBS1
regulation of mitotic spindle organization (GO:0060236)	2/36	0.324214	1	1.72265	1.94031	HSPA1B;HSPA1A
regulation of sodium ion transport (GO:0002028)	2/36	0.324214	1	1.72265	1.94031	ATP1A1;YWHAH
regulation of phosphoprotein phosphatase activity (GO:0043666)	2/36	0.324214	1	1.72265	1.94031	CD300A;HSP90B1
carboxylic acid transmembrane transport (GO:1905039)	2/36	0.324214	1	1.72265	1.94031	SLC7A7;SLC7A11
negative regulation of tumor necrosis factor production (GO:0032720)	2/36	0.324214	1	1.72265	1.94031	ARG2;HAVCR2
regulation of cardiac muscle contraction (GO:0055117)	2/36	0.324214	1	1.72265	1.94031	STC1;SRI
positive regulation of osteoblast differentiation (GO:0045669)	2/36	0.324214	1	1.72265	1.94031	IFITM1;SOX11
sulfur compound catabolic process (GO:0044273)	2/36	0.324214	1	1.72265	1.94031	BGN;SGSH
regulation of systemic arterial blood pressure (GO:0003073)	1/12	0.3253	1	2.58398	2.90183	ADM
regulation of myoblast fusion (GO:1901739)	1/12	0.3253	1	2.58398	2.90183	CD53
negative regulation of chondrocyte differentiation (GO:0032331)	1/12	0.3253	1	2.58398	2.90183	ADAMTS7
negative regulation of ryanodine-sensitive calcium-release channel activity (GO:0060315)	1/12	0.3253	1	2.58398	2.90183	SRI
positive regulation of interleukin-1 production (GO:0032732)	1/12	0.3253	1	2.58398	2.90183	SAA1
import across plasma membrane (GO:0098739)	1/12	0.3253	1	2.58398	2.90183	ATP1A1
regulation of leukocyte cell-cell adhesion (GO:1903037)	1/12	0.3253	1	2.58398	2.90183	ASS1
protein localization to kinetochore (GO:0034501)	1/12	0.3253	1	2.58398	2.90183	CENPT
interleukin-2-mediated signaling pathway (GO:0038110)	1/12	0.3253	1	2.58398	2.90183	IL2RG
retinol metabolic process (GO:0042572)	1/12	0.3253	1	2.58398	2.90183	RDH12
negative regulation of metabolic process (GO:0009892)	1/12	0.3253	1	2.58398	2.90183	IL1B
iron ion transport (GO:0006826)	1/12	0.3253	1	2.58398	2.90183	SLC11A1
cell differentiation in hindbrain (GO:0021533)	1/12	0.3253	1	2.58398	2.90183	ATP7A
pre-mRNA cleavage required for polyadenylation (GO:0098789)	1/12	0.3253	1	2.58398	2.90183	CSTF2
nucleoside catabolic process (GO:0009164)	1/12	0.3253	1	2.58398	2.90183	UPP1
protein import into peroxisome matrix (GO:0016558)	1/12	0.3253	1	2.58398	2.90183	PEX12
positive regulation of potassium ion transmembrane transporter activity (GO:1901018)	1/12	0.3253	1	2.58398	2.90183	ATP1B3
exit from mitosis (GO:0010458)	1/12	0.3253	1	2.58398	2.90183	CLASP1
regulation of cell communication by electrical coupling (GO:0010649)	1/12	0.3253	1	2.58398	2.90183	SRI
phasic smooth muscle contraction (GO:0014821)	1/12	0.3253	1	2.58398	2.90183	EDN1
regulation of establishment of endothelial barrier (GO:1903140)	1/12	0.3253	1	2.58398	2.90183	IL1B
positive regulation of pseudopodium assembly (GO:0031274)	1/12	0.3253	1	2.58398	2.90183	CDC42EP4
cellular response to fluid shear stress (GO:0071498)	1/12	0.3253	1	2.58398	2.90183	ASS1
activation of cysteine-type endopeptidase activity (GO:0097202)	1/12	0.3253	1	2.58398	2.90183	CASP8
kinetochore organization (GO:0051383)	1/12	0.3253	1	2.58398	2.90183	CENPT
regulation of pseudopodium assembly (GO:0031272)	1/12	0.3253	1	2.58398	2.90183	CDC42EP4
response to interleukin-6 (GO:0070741)	1/12	0.3253	1	2.58398	2.90183	CHI3L1
negative regulation of vascular smooth muscle cell proliferation (GO:1904706)	1/12	0.3253	1	2.58398	2.90183	TPM1
protein hydroxylation (GO:0018126)	1/12	0.3253	1	2.58398	2.90183	PLOD2
PERK-mediated unfolded protein response (GO:0036499)	1/12	0.3253	1	2.58398	2.90183	CCL2
regulation of vascular endothelial cell proliferation (GO:1905562)	1/12	0.3253	1	2.58398	2.90183	AKT3
regulation of T cell differentiation in thymus (GO:0033081)	1/12	0.3253	1	2.58398	2.90183	ADAM8
dermatan sulfate biosynthetic process (GO:0030208)	1/12	0.3253	1	2.58398	2.90183	BGN
membrane repolarization during action potential (GO:0086011)	1/12	0.3253	1	2.58398	2.90183	ATP1A1
microtubule anchoring (GO:0034453)	1/12	0.3253	1	2.58398	2.90183	CLASP1
eye photoreceptor cell differentiation (GO:0001754)	1/12	0.3253	1	2.58398	2.90183	STAT3
neuron development (GO:0048666)	6/145	0.326261	1	1.28308	1.43712	CNTNAP2;XBP1;MICALL2;ATP7A;LRP12;RUNX1
negative regulation of cellular protein metabolic process (GO:0032269)	4/90	0.330487	1	1.37812	1.52584	CSTB;EDN1;MEX3A;KNG1
regulation of neuron apoptotic process (GO:0043523)	4/90	0.330487	1	1.37812	1.52584	F2R;CCL3;CCL2;ADAM8
diterpenoid metabolic process (GO:0016101)	3/63	0.332033	1	1.47656	1.62794	SDC4;RDH12;SDC1
negative regulation of peptidase activity (GO:0010466)	3/63	0.332033	1	1.47656	1.62794	CSTB;SERPING1;KNG1
actin polymerization or depolymerization (GO:0008154)	2/37	0.336114	1	1.67609	1.82746	CAP1;MICALL2
organic hydroxy compound transport (GO:0015850)	2/37	0.336114	1	1.67609	1.82746	ABCC3;SLC10A4
regulation of muscle cell differentiation (GO:0051147)	2/37	0.336114	1	1.67609	1.82746	TCF3;ZFP36L1
regulation of nitric-oxide synthase activity (GO:0050999)	2/37	0.336114	1	1.67609	1.82746	GCH1;IL1B
natural killer cell activation (GO:0030101)	2/37	0.336114	1	1.67609	1.82746	CASP8;PRDX1
regulation of blood circulation (GO:1903522)	2/37	0.336114	1	1.67609	1.82746	TPM1;SRI
cardiac muscle contraction (GO:0060048)	2/37	0.336114	1	1.67609	1.82746	MYL4;TPM1
plasma membrane bounded cell projection organization (GO:0120036)	5/119	0.338843	1	1.30285	1.40996	CNTNAP2;TPM1;PLEK;MICALL2;LRP12
calcium ion transport (GO:0006816)	5/119	0.338843	1	1.30285	1.40996	SLN;CCL3;ATP2B2;KCNN4;CCR5
oligosaccharide metabolic process (GO:0009311)	3/64	0.340916	1	1.45349	1.56413	ST8SIA4;ST6GALNAC4;GALNT10
negative regulation of neuron apoptotic process (GO:0043524)	3/64	0.340916	1	1.45349	1.56413	F2R;CCL2;ADAM8
proteolysis (GO:0006508)	11/292	0.342679	1	1.1681	1.25099	MMP12;SRGN;NAPSA;CASP8;MMP3;SRI;ASPRV1;MMP9;CTSS;CTSC;ADAMTS7
dermatan sulfate metabolic process (GO:0030205)	1/13	0.347072	1	2.38521	2.52409	BGN
regulation of granulocyte chemotaxis (GO:0071622)	1/13	0.347072	1	2.38521	2.52409	THBS1
regulation of plasma membrane bounded cell projection organization (GO:0120035)	1/13	0.347072	1	2.38521	2.52409	FCGR2B
nucleotide-sugar metabolic process (GO:0009225)	1/13	0.347072	1	2.38521	2.52409	CSGALNACT1
cellular response to exogenous dsRNA (GO:0071360)	1/13	0.347072	1	2.38521	2.52409	RALB
mitochondrial genome maintenance (GO:0000002)	1/13	0.347072	1	2.38521	2.52409	AKT3
regulation of oligodendrocyte differentiation (GO:0048713)	1/13	0.347072	1	2.38521	2.52409	CXCR4
regulation of superoxide anion generation (GO:0032928)	1/13	0.347072	1	2.38521	2.52409	FPR2
renal absorption (GO:0070293)	1/13	0.347072	1	2.38521	2.52409	MAGED2
muscle cell development (GO:0055001)	1/13	0.347072	1	2.38521	2.52409	SDC1
negative regulation of epidermal growth factor-activated receptor activity (GO:0007175)	1/13	0.347072	1	2.38521	2.52409	ERRFI1
mRNA cleavage involved in mRNA processing (GO:0098787)	1/13	0.347072	1	2.38521	2.52409	CSTF2
positive regulation of skeletal muscle tissue development (GO:0048643)	1/13	0.347072	1	2.38521	2.52409	FAM129B
regulation of triglyceride biosynthetic process (GO:0010866)	1/13	0.347072	1	2.38521	2.52409	C3
tricarboxylic acid metabolic process (GO:0072350)	1/13	0.347072	1	2.38521	2.52409	ASS1
regulation of axon guidance (GO:1902667)	1/13	0.347072	1	2.38521	2.52409	ZSWIM6
negative regulation of voltage-gated calcium channel activity (GO:1901386)	1/13	0.347072	1	2.38521	2.52409	GPR35
regulation of granulocyte macrophage colony-stimulating factor production (GO:0032645)	1/13	0.347072	1	2.38521	2.52409	IL1B
positive regulation of protein complex disassembly (GO:0043243)	1/13	0.347072	1	2.38521	2.52409	SLN
glutamine family amino acid biosynthetic process (GO:0009084)	1/13	0.347072	1	2.38521	2.52409	ASS1
regulation of cAMP metabolic process (GO:0030814)	1/13	0.347072	1	2.38521	2.52409	ADM
copper ion homeostasis (GO:0055070)	1/13	0.347072	1	2.38521	2.52409	ATP7A
response to UV-B (GO:0010224)	1/13	0.347072	1	2.38521	2.52409	CDKN1A
phosphate ion transport (GO:0006817)	1/13	0.347072	1	2.38521	2.52409	SLC37A1
B cell activation involved in immune response (GO:0002312)	1/13	0.347072	1	2.38521	2.52409	FCGR2B
neuron fate commitment (GO:0048663)	1/13	0.347072	1	2.38521	2.52409	ID2
regulation of endothelial cell chemotaxis (GO:2001026)	1/13	0.347072	1	2.38521	2.52409	THBS1
regulation of necrotic cell death (GO:0010939)	1/13	0.347072	1	2.38521	2.52409	CASP8
dicarboxylic acid catabolic process (GO:0043649)	1/13	0.347072	1	2.38521	2.52409	GAD1
regulation of oxidoreductase activity (GO:0051341)	1/13	0.347072	1	2.38521	2.52409	ATP7A
secretion (GO:0046903)	1/13	0.347072	1	2.38521	2.52409	TPD52
regulation of fibrinolysis (GO:0051917)	1/13	0.347072	1	2.38521	2.52409	THBS1
semaphorin-plexin signaling pathway involved in neuron projection guidance (GO:1902285)	1/13	0.347072	1	2.38521	2.52409	SEMA3F
chondroitin sulfate catabolic process (GO:0030207)	1/13	0.347072	1	2.38521	2.52409	BGN
positive regulation of interleukin-17 production (GO:0032740)	1/13	0.347072	1	2.38521	2.52409	MYD88
energy coupled proton transport, down electrochemical gradient (GO:0015985)	1/13	0.347072	1	2.38521	2.52409	TCIRG1
glomerular visceral epithelial cell differentiation (GO:0072112)	1/13	0.347072	1	2.38521	2.52409	IQGAP1
negative regulation of cartilage development (GO:0061037)	1/13	0.347072	1	2.38521	2.52409	ADAMTS7
negative regulation of interleukin-10 production (GO:0032693)	1/13	0.347072	1	2.38521	2.52409	FCGR2B
protein kinase C-activating G-protein coupled receptor signaling pathway (GO:0007205)	1/13	0.347072	1	2.38521	2.52409	F2R
tRNA splicing, via endonucleolytic cleavage and ligation (GO:0006388)	1/13	0.347072	1	2.38521	2.52409	CSTF2
regulation of sodium ion transmembrane transporter activity (GO:2000649)	2/38	0.347949	1	1.63199	1.72289	FXYD5;YWHAH
regulation of peptidyl-threonine phosphorylation (GO:0010799)	2/38	0.347949	1	1.63199	1.72289	DDIT4;CHI3L1
response to steroid hormone (GO:0048545)	2/38	0.347949	1	1.63199	1.72289	ATP1A1;THBS1
positive regulation of multi-organism process (GO:0043902)	2/38	0.347949	1	1.63199	1.72289	INHBA;LHFPL2
organic cyclic compound biosynthetic process (GO:1901362)	2/38	0.347949	1	1.63199	1.72289	GCH1;HDC
glucose metabolic process (GO:0006006)	3/65	0.34979	1	1.43113	1.50329	PGAM1;ENO1;ENO2
macromolecular complex assembly (GO:0065003)	5/121	0.351661	1	1.28131	1.33909	SLC7A7;SLC2A1;CAPG;TRAF1;SKAP2
cell cycle G1/S phase transition (GO:0044843)	4/93	0.352558	1	1.33367	1.3904	PLK3;CDKN1A;INHBA;CDKN3
regulation of acute inflammatory response (GO:0002673)	5/122	0.358079	1	1.27081	1.30513	C3;OSM;SERPING1;ADAM8;OSMR
Golgi organization (GO:0007030)	5/122	0.358079	1	1.27081	1.30513	USP6NL;PI4K2B;PLK3;TMED9;CLASP1
regulation of cell differentiation (GO:0045595)	5/122	0.358079	1	1.27081	1.30513	LGALS3;JUNB;CLASP1;CTGF;RUNX1
cellular response to type I interferon (GO:0071357)	3/66	0.358651	1	1.40944	1.44525	IFNAR2;IFITM1;MYD88
regulation of JAK-STAT cascade (GO:0046425)	3/66	0.358651	1	1.40944	1.44525	SOCS3;BCL3;BGN
negative regulation of blood vessel morphogenesis (GO:2000181)	3/66	0.358651	1	1.40944	1.44525	SULF1;THBS1;FAM129B
type I interferon signaling pathway (GO:0060337)	3/66	0.358651	1	1.40944	1.44525	IFNAR2;IFITM1;MYD88
negative regulation of cell adhesion (GO:0007162)	3/66	0.358651	1	1.40944	1.44525	GCNT2;KNG1;SIPA1
potassium ion import (GO:0010107)	2/39	0.359713	1	1.59014	1.62584	ATP1B3;ATP1A1
T cell differentiation (GO:0030217)	2/39	0.359713	1	1.59014	1.62584	ZAP70;ZFP36L1
homotypic cell-cell adhesion (GO:0034109)	2/39	0.359713	1	1.59014	1.62584	PLEK;FLNA
regulation of cysteine-type endopeptidase activity involved in apoptotic process (GO:0043281)	4/94	0.35992	1	1.31948	1.34834	F2R;TNFRSF1B;THBS1;CD44
proteolysis involved in cellular protein catabolic process (GO:0051603)	4/94	0.35992	1	1.31948	1.34834	CASP8;CTSS;CTSC;ADAMTS7
protein transport (GO:0015031)	12/327	0.365292	1	1.1379	1.14593	USP6NL;ATP6V1A;TMED9;APPBP2;ADPRH;LAMP2;ATP6V1H;TBC1D9;TCIRG1;STX11;HSP90B1;YWHAH
cellular response to fibroblast growth factor stimulus (GO:0044344)	4/95	0.367279	1	1.30559	1.30772	ZFP36;CCL2;CD44;ZFP36L1
negative regulation of epithelial cell proliferation (GO:0050680)	3/67	0.367494	1	1.38841	1.38986	BRCA2;SULF1;THBS1
regulation of fibroblast migration (GO:0010762)	1/14	0.368143	1	2.21484	2.21326	THBS1
branching involved in blood vessel morphogenesis (GO:0001569)	1/14	0.368143	1	2.21484	2.21326	COL4A1
regulation of Golgi organization (GO:1903358)	1/14	0.368143	1	2.21484	2.21326	USP6NL
glucosamine-containing compound metabolic process (GO:1901071)	1/14	0.368143	1	2.21484	2.21326	CHST2
negative regulation of receptor-mediated endocytosis (GO:0048261)	1/14	0.368143	1	2.21484	2.21326	SDCBP
regulation of lipase activity (GO:0060191)	1/14	0.368143	1	2.21484	2.21326	RHOC
positive regulation of myoblast differentiation (GO:0045663)	1/14	0.368143	1	2.21484	2.21326	BTG1
stem cell development (GO:0048864)	1/14	0.368143	1	2.21484	2.21326	SOX11
regulation of phosphate metabolic process (GO:0019220)	1/14	0.368143	1	2.21484	2.21326	SRPX2
positive regulation of T cell mediated cytotoxicity (GO:0001916)	1/14	0.368143	1	2.21484	2.21326	PVR
neurotransmitter biosynthetic process (GO:0042136)	1/14	0.368143	1	2.21484	2.21326	MOXD1
regulation of extracellular matrix disassembly (GO:0010715)	1/14	0.368143	1	2.21484	2.21326	CLASP1
negative regulation of interleukin-1 beta production (GO:0032691)	1/14	0.368143	1	2.21484	2.21326	MEFV
regulation of monocyte differentiation (GO:0045655)	1/14	0.368143	1	2.21484	2.21326	ZFP36L1
modified amino acid transport (GO:0072337)	1/14	0.368143	1	2.21484	2.21326	SLC1A4
glucuronate metabolic process (GO:0019585)	1/14	0.368143	1	2.21484	2.21326	UGT1A10
cell communication by electrical coupling involved in cardiac conduction (GO:0086064)	1/14	0.368143	1	2.21484	2.21326	ATP1A1
negative regulation of focal adhesion assembly (GO:0051895)	1/14	0.368143	1	2.21484	2.21326	THBS1
pyrimidine-containing compound catabolic process (GO:0072529)	1/14	0.368143	1	2.21484	2.21326	UPP1
regulation of lymphocyte differentiation (GO:0045619)	1/14	0.368143	1	2.21484	2.21326	ZFP36L1
hydrogen peroxide catabolic process (GO:0042744)	1/14	0.368143	1	2.21484	2.21326	PRDX1
regulation of neural precursor cell proliferation (GO:2000177)	1/14	0.368143	1	2.21484	2.21326	ID2
cellular protein complex disassembly (GO:0043624)	1/14	0.368143	1	2.21484	2.21326	GSPT2
cell migration involved in sprouting angiogenesis (GO:0002042)	1/14	0.368143	1	2.21484	2.21326	EPHB4
smooth muscle contraction (GO:0006939)	1/14	0.368143	1	2.21484	2.21326	EDNRA
monosaccharide transport (GO:0015749)	1/14	0.368143	1	2.21484	2.21326	SLC2A6
cAMP biosynthetic process (GO:0006171)	1/14	0.368143	1	2.21484	2.21326	ADM
negative regulation of cell migration involved in sprouting angiogenesis (GO:0090051)	1/14	0.368143	1	2.21484	2.21326	THBS1
necroptotic process (GO:0070266)	1/14	0.368143	1	2.21484	2.21326	CD14
regulation of gastrulation (GO:0010470)	1/14	0.368143	1	2.21484	2.21326	CLASP1
RNA splicing, via endonucleolytic cleavage and ligation (GO:0000394)	1/14	0.368143	1	2.21484	2.21326	CSTF2
negative regulation of smooth muscle cell migration (GO:0014912)	1/14	0.368143	1	2.21484	2.21326	TPM1
positive regulation of purine nucleotide metabolic process (GO:1900544)	1/14	0.368143	1	2.21484	2.21326	ADM
positive regulation of muscle hypertrophy (GO:0014742)	1/14	0.368143	1	2.21484	2.21326	EDN1
regulation of interferon-gamma biosynthetic process (GO:0045072)	1/14	0.368143	1	2.21484	2.21326	INHBA
regulation of response to interferon-gamma (GO:0060330)	1/14	0.368143	1	2.21484	2.21326	SOCS3
regulation of adaptive immune response (GO:0002819)	1/14	0.368143	1	2.21484	2.21326	FCGR2B
establishment of protein localization to chromosome (GO:0070199)	1/14	0.368143	1	2.21484	2.21326	BRCA2
positive regulation of smooth muscle contraction (GO:0045987)	1/14	0.368143	1	2.21484	2.21326	F2R
negative regulation of cation transmembrane transport (GO:1904063)	1/14	0.368143	1	2.21484	2.21326	MMP9
positive regulation of blood vessel diameter (GO:0097755)	1/14	0.368143	1	2.21484	2.21326	ADM
response to ATP (GO:0033198)	1/14	0.368143	1	2.21484	2.21326	HSP90B1
tumor necrosis factor-mediated signaling pathway (GO:0033209)	5/124	0.370925	1	1.25031	1.24001	TNFSF14;TNFRSF11A;LTBR;TNFRSF1B;CARD14
cellular calcium ion homeostasis (GO:0006874)	5/124	0.370925	1	1.25031	1.24001	CCL7;CCL3;STC1;ATP2B2;ATP13A3
signal transduction by p53 class mediator (GO:0072331)	2/40	0.371398	1	1.55039	1.53563	BCL3;NDRG1
regulation of type I interferon-mediated signaling pathway (GO:0060338)	2/40	0.371398	1	1.55039	1.53563	IFNAR2;PTPN1
inositol lipid-mediated signaling (GO:0048017)	2/40	0.371398	1	1.55039	1.53563	INPP5F;PTAFR
positive regulation of protein localization to membrane (GO:1905477)	4/96	0.374634	1	1.29199	1.26848	CASP8;BCL2L11;BID;YWHAH
negative regulation of protein serine/threonine kinase activity (GO:0071901)	3/68	0.376316	1	1.36799	1.33697	PTPN1;CD300A;IL1B
negative regulation of protein binding (GO:0032091)	3/68	0.376316	1	1.36799	1.33697	RALB;PDGFB;ARRB2
extrinsic apoptotic signaling pathway (GO:0097191)	3/68	0.376316	1	1.36799	1.33697	CASP8;INHBA;BID
insulin receptor signaling pathway (GO:0008286)	3/68	0.376316	1	1.36799	1.33697	ATP6V1A;ATP6V1H;TCIRG1
positive regulation of autophagy (GO:0010508)	3/68	0.376316	1	1.36799	1.33697	BNIP3L;PLK3;MEFV
protein localization to nucleus (GO:0034504)	4/97	0.381982	1	1.27867	1.23057	MMP12;BCL3;LMNA;STAT3
ameboidal-type cell migration (GO:0001667)	2/41	0.382996	1	1.51257	1.45166	SEMA7A;SEMA3F
response to cAMP (GO:0051591)	2/41	0.382996	1	1.51257	1.45166	JUNB;ZFP36L1
response to peptide hormone (GO:0043434)	2/41	0.382996	1	1.51257	1.45166	XBP1;ZFP36L1
negative regulation of ERK1 and ERK2 cascade (GO:0070373)	2/41	0.382996	1	1.51257	1.45166	PTPN1;DUSP6
negative regulation of cytokine-mediated signaling pathway (GO:0001960)	2/41	0.382996	1	1.51257	1.45166	IL1RN;ARG1
neuron migration (GO:0001764)	2/41	0.382996	1	1.51257	1.45166	DDIT4;LRP12
protein sumoylation (GO:0016925)	3/69	0.385112	1	1.34816	1.28644	INCENP;BIRC5;CDCA8
monocarboxylic acid biosynthetic process (GO:0072330)	3/69	0.385112	1	1.34816	1.28644	XBP1;BGN;CYP7B1
positive regulation of peptidyl-lysine acetylation (GO:2000758)	1/15	0.388534	1	2.06718	1.95426	IL1B
membrane repolarization during cardiac muscle cell action potential (GO:0086013)	1/15	0.388534	1	2.06718	1.95426	ATP1A1
regulation of mast cell degranulation (GO:0043304)	1/15	0.388534	1	2.06718	1.95426	CD300A
catecholamine metabolic process (GO:0006584)	1/15	0.388534	1	2.06718	1.95426	ATP7A
retinoic acid metabolic process (GO:0042573)	1/15	0.388534	1	2.06718	1.95426	ALDH1A2
negative regulation of peptidyl-threonine phosphorylation (GO:0010801)	1/15	0.388534	1	2.06718	1.95426	DDIT4
maintenance of protein location in nucleus (GO:0051457)	1/15	0.388534	1	2.06718	1.95426	BCL3
positive regulation of response to wounding (GO:1903036)	1/15	0.388534	1	2.06718	1.95426	ADRA2A
negative regulation of adherens junction organization (GO:1903392)	1/15	0.388534	1	2.06718	1.95426	THBS1
autonomic nervous system development (GO:0048483)	1/15	0.388534	1	2.06718	1.95426	SOX11
negative regulation of platelet-derived growth factor receptor signaling pathway (GO:0010642)	1/15	0.388534	1	2.06718	1.95426	PDGFB
protein localization to chromosome, telomeric region (GO:0070198)	1/15	0.388534	1	2.06718	1.95426	BRCA2
positive regulation of small GTPase mediated signal transduction (GO:0051057)	1/15	0.388534	1	2.06718	1.95426	RASGRP4
substrate-dependent cell migration (GO:0006929)	1/15	0.388534	1	2.06718	1.95426	SDCBP
positive regulation of protein import (GO:1904591)	1/15	0.388534	1	2.06718	1.95426	ARHGEF5
lipoxygenase pathway (GO:0019372)	1/15	0.388534	1	2.06718	1.95426	ALOX5AP
regulation of tumor necrosis factor secretion (GO:1904467)	1/15	0.388534	1	2.06718	1.95426	HAVCR2
glycerophospholipid catabolic process (GO:0046475)	1/15	0.388534	1	2.06718	1.95426	INPP5F
N-acetylglucosamine metabolic process (GO:0006044)	1/15	0.388534	1	2.06718	1.95426	CHST2
pyrimidine nucleoside metabolic process (GO:0006213)	1/15	0.388534	1	2.06718	1.95426	UPP1
regulation of cell-substrate junction assembly (GO:0090109)	1/15	0.388534	1	2.06718	1.95426	CLASP1
positive regulation of phosphoprotein phosphatase activity (GO:0032516)	1/15	0.388534	1	2.06718	1.95426	CD300A
negative regulation of cellular component movement (GO:0051271)	1/15	0.388534	1	2.06718	1.95426	ACTN1
neural crest cell differentiation (GO:0014033)	1/15	0.388534	1	2.06718	1.95426	SOX11
mesenchymal cell development (GO:0014031)	1/15	0.388534	1	2.06718	1.95426	SOX11
vasculature development (GO:0001944)	1/15	0.388534	1	2.06718	1.95426	ERRFI1
negative regulation of viral entry into host cell (GO:0046597)	1/15	0.388534	1	2.06718	1.95426	IFITM1
negative regulation of platelet activation (GO:0010544)	1/15	0.388534	1	2.06718	1.95426	PDGFB
positive regulation of NF-kappaB import into nucleus (GO:0042346)	1/15	0.388534	1	2.06718	1.95426	IL1B
filopodium assembly (GO:0046847)	1/15	0.388534	1	2.06718	1.95426	SPATA13
positive regulation of syncytium formation by plasma membrane fusion (GO:0060143)	1/15	0.388534	1	2.06718	1.95426	CD53
regulation of protein complex disassembly (GO:0043244)	1/15	0.388534	1	2.06718	1.95426	SLN
negative regulation of protein processing (GO:0010955)	1/15	0.388534	1	2.06718	1.95426	THBS1
toll-like receptor 4 signaling pathway (GO:0034142)	1/15	0.388534	1	2.06718	1.95426	CD14
regulation of fertilization (GO:0080154)	1/15	0.388534	1	2.06718	1.95426	LHFPL2
protein targeting to peroxisome (GO:0006625)	1/15	0.388534	1	2.06718	1.95426	PEX12
positive regulation of cysteine-type endopeptidase activity involved in apoptotic signaling pathway (GO:2001269)	1/15	0.388534	1	2.06718	1.95426	CASP8
positive regulation of protein export from nucleus (GO:0046827)	1/15	0.388534	1	2.06718	1.95426	IL1B
regulation of peptide secretion (GO:0002791)	1/15	0.388534	1	2.06718	1.95426	SAA1
negative regulation of anoikis (GO:2000811)	1/15	0.388534	1	2.06718	1.95426	ITGA5
inhibition of cysteine-type endopeptidase activity (GO:0097340)	1/15	0.388534	1	2.06718	1.95426	BIRC5
regulation of cell junction assembly (GO:1901888)	1/15	0.388534	1	2.06718	1.95426	RUNX1
negative regulation of angiogenesis (GO:0016525)	3/70	0.393879	1	1.3289	1.23815	SULF1;THBS1;FAM129B
negative regulation of proteolysis (GO:0045861)	2/42	0.394501	1	1.47656	1.3734	CSTB;KNG1
negative regulation of response to stimulus (GO:0048585)	5/128	0.396608	1	1.21124	1.12016	PTPN1;AKT3;FCGR2B;EPHB4;ADRA2A
regulation of insulin secretion (GO:0050796)	4/99	0.396645	1	1.25284	1.15852	MIDN;IL1B;SLC2A1;ADRA2A
regulation of Notch signaling pathway (GO:0008593)	3/71	0.402614	1	1.31019	1.19198	EGFL7;STAT3;FAM129B
vascular endothelial growth factor receptor signaling pathway (GO:0048010)	3/71	0.402614	1	1.31019	1.19198	NCF4;SULF1;PGF
positive regulation of proteasomal ubiquitin-dependent protein catabolic process (GO:0032436)	3/71	0.402614	1	1.31019	1.19198	PLK3;HSPA1B;HSPA1A
interferon-gamma-mediated signaling pathway (GO:0060333)	3/71	0.402614	1	1.31019	1.19198	CIITA;PTAFR;CD44
regulation of mRNA stability (GO:0043488)	5/129	0.403017	1	1.20185	1.09221	ZFP36;SLC11A1;VIM;ZFP36L1;HSPA1A
regulation of interleukin-6 production (GO:0032675)	2/43	0.405907	1	1.44222	1.30035	IL1B;MYD88
cellular response to calcium ion (GO:0071277)	2/43	0.405907	1	1.44222	1.30035	ALOX5AP;IQGAP1
cellular response to radiation (GO:0071478)	2/43	0.405907	1	1.44222	1.30035	CDKN1A;RHOB
glycolipid biosynthetic process (GO:0009247)	2/43	0.405907	1	1.44222	1.30035	UGCG;B3GNT5
regulation of ion transmembrane transporter activity (GO:0032412)	2/43	0.405907	1	1.44222	1.30035	FXYD5;YWHAH
positive regulation of epithelial cell apoptotic process (GO:1904037)	1/16	0.408269	1	1.93798	1.7361	THBS1
regulation of actin nucleation (GO:0051125)	1/16	0.408269	1	1.93798	1.7361	CORO1A
negative regulation of NF-kappaB import into nucleus (GO:0042347)	1/16	0.408269	1	1.93798	1.7361	C1QTNF3
C21-steroid hormone biosynthetic process (GO:0006700)	1/16	0.408269	1	1.93798	1.7361	ADM
fibrinolysis (GO:0042730)	1/16	0.408269	1	1.93798	1.7361	PLAUR
positive regulation of cardiac muscle tissue growth (GO:0055023)	1/16	0.408269	1	1.93798	1.7361	EDN1
cellular response to dsRNA (GO:0071359)	1/16	0.408269	1	1.93798	1.7361	RALB
negative regulation of response to wounding (GO:1903035)	1/16	0.408269	1	1.93798	1.7361	INPP5F
hyaluronan catabolic process (GO:0030214)	1/16	0.408269	1	1.93798	1.7361	CD44
cytoplasmic sequestering of transcription factor (GO:0042994)	1/16	0.408269	1	1.93798	1.7361	NFKBIE
stabilization of membrane potential (GO:0030322)	1/16	0.408269	1	1.93798	1.7361	KCNN4
neuromuscular process (GO:0050905)	1/16	0.408269	1	1.93798	1.7361	GCH1
negative regulation of striated muscle cell differentiation (GO:0051154)	1/16	0.408269	1	1.93798	1.7361	XBP1
positive regulation of mRNA processing (GO:0050685)	1/16	0.408269	1	1.93798	1.7361	HSPA1A
regulation of bicellular tight junction assembly (GO:2000810)	1/16	0.408269	1	1.93798	1.7361	RUNX1
extracellular matrix assembly (GO:0085029)	1/16	0.408269	1	1.93798	1.7361	ATP7A
regulation of energy homeostasis (GO:2000505)	1/16	0.408269	1	1.93798	1.7361	METRNL
positive regulation of cardiac muscle hypertrophy (GO:0010613)	1/16	0.408269	1	1.93798	1.7361	EDN1
negative regulation of transcription regulatory region DNA binding (GO:2000678)	1/16	0.408269	1	1.93798	1.7361	SOX11
hexose transport (GO:0008645)	1/16	0.408269	1	1.93798	1.7361	SLC2A6
neuron apoptotic process (GO:0051402)	1/16	0.408269	1	1.93798	1.7361	BID
pyrimidine-containing compound metabolic process (GO:0072527)	1/16	0.408269	1	1.93798	1.7361	UCK2
negative regulation of DNA replication (GO:0008156)	1/16	0.408269	1	1.93798	1.7361	S100A11
positive regulation of cyclic nucleotide metabolic process (GO:0030801)	1/16	0.408269	1	1.93798	1.7361	ADM
positive regulation of nitric-oxide synthase activity (GO:0051000)	1/16	0.408269	1	1.93798	1.7361	GCH1
endoplasmic reticulum to cytosol transport (GO:1903513)	1/16	0.408269	1	1.93798	1.7361	HSP90B1
myoblast differentiation (GO:0045445)	1/16	0.408269	1	1.93798	1.7361	SDC1
positive regulation of positive chemotaxis (GO:0050927)	1/16	0.408269	1	1.93798	1.7361	PGF
regulation of interferon-alpha production (GO:0032647)	1/16	0.408269	1	1.93798	1.7361	HAVCR2
programmed necrotic cell death (GO:0097300)	1/16	0.408269	1	1.93798	1.7361	CD14
cellular response to transforming growth factor beta stimulus (GO:0071560)	4/101	0.411251	1	1.22803	1.09117	GCNT2;ARRB2;F11R;ZFP36L1
regulation of cell communication (GO:0010646)	3/72	0.411312	1	1.29199	1.14781	PTPN1;BIRC5;SRI
positive regulation of lymphocyte proliferation (GO:0050671)	3/72	0.411312	1	1.29199	1.14781	CD80;IL1B;MIF
response to insulin (GO:0032868)	3/72	0.411312	1	1.29199	1.14781	XBP1;CPEB2;ZFP36L1
protein glycosylation (GO:0006486)	5/131	0.41581	1	1.1835	1.03856	B3GNT5;ST8SIA4;GCNT2;GALNT10;FUT4
cardiac ventricle morphogenesis (GO:0003208)	2/44	0.417208	1	1.40944	1.23209	TPM1;SOX11
negative regulation of protein metabolic process (GO:0051248)	2/44	0.417208	1	1.40944	1.23209	EDN1;FLNA
eye development (GO:0001654)	2/44	0.417208	1	1.40944	1.23209	SALL2;COL5A2
development of primary male sexual characteristics (GO:0046546)	2/44	0.417208	1	1.40944	1.23209	INHBA;LHFPL2
intrinsic apoptotic signaling pathway by p53 class mediator (GO:0072332)	2/44	0.417208	1	1.40944	1.23209	DDIT4;BCL3
response to unfolded protein (GO:0006986)	2/44	0.417208	1	1.40944	1.23209	HSPA1B;HSPA1A
negative regulation of DNA metabolic process (GO:0051053)	2/44	0.417208	1	1.40944	1.23209	S100A11;FAM129B
regulation of ATP metabolic process (GO:1903578)	2/44	0.417208	1	1.40944	1.23209	PGAM1;ATP7A
regulation of multicellular organismal development (GO:2000026)	2/44	0.417208	1	1.40944	1.23209	CLASP1;DUSP6
protein localization to membrane (GO:0072657)	6/161	0.418386	1	1.15557	1.00691	DLG3;FLNA;ATP1B3;F11R;BID;RAPGEF6
protein processing (GO:0016485)	4/102	0.418527	1	1.21599	1.05914	SRGN;F10;ASPRV1;CTSS
regulation of protein ubiquitination (GO:0031396)	4/102	0.418527	1	1.21599	1.05914	BCL10;ARRB2;HSPA1B;HSPA1A
intrinsic apoptotic signaling pathway (GO:0097193)	4/102	0.418527	1	1.21599	1.05914	CDKN1A;CEBPB;BCL2L11;CASP4
negative regulation of cysteine-type endopeptidase activity (GO:2000117)	3/73	0.41997	1	1.27429	1.10554	TNFRSF1B;THBS1;CD44
regulation of immune response (GO:0050776)	9/252	0.425537	1	1.10742	0.946184	C3;IFITM1;TYROBP;SELL;CD300A;PILRA;FCGR2B;PVR;TREM1
cellular glucuronidation (GO:0052695)	1/17	0.427367	1	1.82399	1.55059	UGT1A10
sialylation (GO:0097503)	1/17	0.427367	1	1.82399	1.55059	ST6GALNAC4
positive regulation of G-protein coupled receptor protein signaling pathway (GO:0045745)	1/17	0.427367	1	1.82399	1.55059	C3
microtubule nucleation (GO:0007020)	1/17	0.427367	1	1.82399	1.55059	CLASP1
positive regulation of nitrogen compound metabolic process (GO:0051173)	1/17	0.427367	1	1.82399	1.55059	PDGFB
RNA stabilization (GO:0043489)	1/17	0.427367	1	1.82399	1.55059	SLC11A1
regulation of transposition (GO:0010528)	1/17	0.427367	1	1.82399	1.55059	PIWIL2
positive regulation of monocyte chemotaxis (GO:0090026)	1/17	0.427367	1	1.82399	1.55059	FPR2
positive regulation of striated muscle cell differentiation (GO:0051155)	1/17	0.427367	1	1.82399	1.55059	EDN1
positive regulation of antigen receptor-mediated signaling pathway (GO:0050857)	1/17	0.427367	1	1.82399	1.55059	KCNN4
negative regulation of interleukin-8 production (GO:0032717)	1/17	0.427367	1	1.82399	1.55059	BCL3
N-glycan processing (GO:0006491)	1/17	0.427367	1	1.82399	1.55059	ST8SIA4
negative regulation of reactive oxygen species metabolic process (GO:2000378)	1/17	0.427367	1	1.82399	1.55059	MMP3
positive regulation of stem cell proliferation (GO:2000648)	1/17	0.427367	1	1.82399	1.55059	SOX11
negative regulation of stress fiber assembly (GO:0051497)	1/17	0.427367	1	1.82399	1.55059	CLASP1
positive regulation of cellular protein catabolic process (GO:1903364)	1/17	0.427367	1	1.82399	1.55059	CTSC
regulation of receptor recycling (GO:0001919)	1/17	0.427367	1	1.82399	1.55059	INPP5F
response to purine-containing compound (GO:0014074)	1/17	0.427367	1	1.82399	1.55059	JUNB
regulation of transcription from RNA polymerase I promoter (GO:0006356)	1/17	0.427367	1	1.82399	1.55059	FLNA
virion assembly (GO:0019068)	1/17	0.427367	1	1.82399	1.55059	USP6NL
neurotrophin signaling pathway (GO:0038179)	1/17	0.427367	1	1.82399	1.55059	DDIT4
chaperone-mediated protein complex assembly (GO:0051131)	1/17	0.427367	1	1.82399	1.55059	HSPA1A
regulation of lamellipodium organization (GO:1902743)	1/17	0.427367	1	1.82399	1.55059	CD44
cellular response to inorganic substance (GO:0071241)	1/17	0.427367	1	1.82399	1.55059	MMP3
regulation of focal adhesion assembly (GO:0051893)	2/45	0.4284	1	1.37812	1.16823	THBS1;CLASP1
negative regulation of immune system process (GO:0002683)	2/45	0.4284	1	1.37812	1.16823	BCL10;FCGR2B
positive regulation of macroautophagy (GO:0016239)	2/45	0.4284	1	1.37812	1.16823	BNIP3L;RALB
positive regulation of intracellular transport (GO:0032388)	2/45	0.4284	1	1.37812	1.16823	PLK3;BID
heart contraction (GO:0060047)	2/45	0.4284	1	1.37812	1.16823	MYL4;TPM1
posttranscriptional regulation of gene expression (GO:0010608)	2/45	0.4284	1	1.37812	1.16823	GCNT2;MATR3
regulation of peptide hormone secretion (GO:0090276)	3/74	0.428585	1	1.25707	1.06507	IL1B;SLC2A1;ADRA2A
mitotic spindle organization (GO:0007052)	3/75	0.437155	1	1.24031	1.02632	BIRC5;FLNA;CLASP1
glucose homeostasis (GO:0042593)	3/75	0.437155	1	1.24031	1.02632	HK3;STAT3;ADRA2A
negative regulation of ossification (GO:0030279)	2/46	0.439477	1	1.34816	1.10842	SRGN;CCL3
positive regulation of lymphocyte activation (GO:0051251)	4/105	0.44022	1	1.18125	0.96919	TNIP2;SIRPA;CCL2;SIRPB1
adenylate cyclase-modulating G-protein coupled receptor signaling pathway (GO:0007188)	5/135	0.441251	1	1.14844	0.939582	RGS1;ADM;GPR84;FPR2;ADRA2A
regulation of adherens junction organization (GO:1903391)	1/18	0.445851	1	1.72265	1.39151	CLASP1
long-chain fatty-acyl-CoA biosynthetic process (GO:0035338)	1/18	0.445851	1	1.72265	1.39151	HSD17B12
membrane lipid metabolic process (GO:0006643)	1/18	0.445851	1	1.72265	1.39151	ST6GALNAC4
receptor localization to synapse (GO:0097120)	1/18	0.445851	1	1.72265	1.39151	DLG3
nuclear envelope reassembly (GO:0031468)	1/18	0.445851	1	1.72265	1.39151	LMNA
actin filament polymerization (GO:0030041)	1/18	0.445851	1	1.72265	1.39151	MICALL2
regulation of cellular response to transforming growth factor beta stimulus (GO:1903844)	1/18	0.445851	1	1.72265	1.39151	SOX11
cardiac muscle cell contraction (GO:0086003)	1/18	0.445851	1	1.72265	1.39151	ATP1A1
release of cytochrome c from mitochondria (GO:0001836)	1/18	0.445851	1	1.72265	1.39151	BID
calcium-mediated signaling using intracellular calcium source (GO:0035584)	1/18	0.445851	1	1.72265	1.39151	SELP
positive regulation of lipid catabolic process (GO:0050996)	1/18	0.445851	1	1.72265	1.39151	IL1B
maintenance of protein localization in organelle (GO:0072595)	1/18	0.445851	1	1.72265	1.39151	BCL3
leukotriene biosynthetic process (GO:0019370)	1/18	0.445851	1	1.72265	1.39151	ALOX5AP
negative regulation of fibroblast proliferation (GO:0048147)	1/18	0.445851	1	1.72265	1.39151	CD300A
establishment of mitotic spindle localization (GO:0040001)	1/18	0.445851	1	1.72265	1.39151	CLASP1
establishment or maintenance of apical/basal cell polarity (GO:0035088)	1/18	0.445851	1	1.72265	1.39151	DLG3
positive regulation of metabolic process (GO:0009893)	1/18	0.445851	1	1.72265	1.39151	ATP7A
anion homeostasis (GO:0055081)	1/18	0.445851	1	1.72265	1.39151	XBP1
regulation of oxidative stress-induced intrinsic apoptotic signaling pathway (GO:1902175)	1/18	0.445851	1	1.72265	1.39151	P4HB
negative regulation of microtubule depolymerization (GO:0007026)	1/18	0.445851	1	1.72265	1.39151	CLASP1
retrograde protein transport, ER to cytosol (GO:0030970)	1/18	0.445851	1	1.72265	1.39151	HSP90B1
skeletal muscle contraction (GO:0003009)	1/18	0.445851	1	1.72265	1.39151	MYH8
regulation of cardiac muscle cell membrane repolarization (GO:0099623)	1/18	0.445851	1	1.72265	1.39151	FLNA
negative regulation of peptidyl-serine phosphorylation (GO:0033137)	1/18	0.445851	1	1.72265	1.39151	DDIT4
positive regulation of natural killer cell mediated cytotoxicity (GO:0045954)	1/18	0.445851	1	1.72265	1.39151	PVR
positive regulation of p38MAPK cascade (GO:1900745)	1/18	0.445851	1	1.72265	1.39151	IL1B
blood vessel endothelial cell migration (GO:0043534)	1/18	0.445851	1	1.72265	1.39151	EPHB4
regulation of epithelial cell differentiation (GO:0030856)	1/18	0.445851	1	1.72265	1.39151	CEBPB
regulation of microtubule polymerization or depolymerization (GO:0031110)	1/18	0.445851	1	1.72265	1.39151	CLASP1
positive regulation of carbohydrate metabolic process (GO:0045913)	1/18	0.445851	1	1.72265	1.39151	PDGFB
regulation of peptidase activity (GO:0052547)	1/18	0.445851	1	1.72265	1.39151	CSTB
establishment of epithelial cell polarity (GO:0090162)	1/18	0.445851	1	1.72265	1.39151	CLASP1
cell-substrate adherens junction assembly (GO:0007045)	1/18	0.445851	1	1.72265	1.39151	ACTN1
regulation of smooth muscle cell migration (GO:0014910)	1/18	0.445851	1	1.72265	1.39151	PDGFB
piRNA metabolic process (GO:0034587)	1/18	0.445851	1	1.72265	1.39151	PIWIL2
response to organophosphorus (GO:0046683)	1/18	0.445851	1	1.72265	1.39151	JUNB
positive regulation of natural killer cell mediated immunity (GO:0002717)	1/18	0.445851	1	1.72265	1.39151	PVR
focal adhesion assembly (GO:0048041)	1/18	0.445851	1	1.72265	1.39151	ACTN1
G1/S transition of mitotic cell cycle (GO:0000082)	4/106	0.4474	1	1.1701	0.941118	PLK3;CDKN1A;INHBA;CDKN3
cellular response to ionizing radiation (GO:0071479)	2/47	0.450436	1	1.31948	1.05234	CDKN1A;RHOB
regulation of G1/S transition of mitotic cell cycle (GO:2000045)	2/47	0.450436	1	1.31948	1.05234	CDKN1A;ID2
regulation of generation of precursor metabolites and energy (GO:0043467)	2/47	0.450436	1	1.31948	1.05234	PGAM1;ATP7A
transforming growth factor beta receptor signaling pathway (GO:0007179)	3/77	0.454144	1	1.20809	0.953598	GCNT2;ARRB2;F11R
regulation of hematopoietic stem cell differentiation (GO:1902036)	3/77	0.454144	1	1.20809	0.953598	TAL1;TCF3;RUNX1
nucleic acid-templated transcription (GO:0097659)	3/77	0.454144	1	1.20809	0.953598	NFE2;BCL3;TCF3
positive regulation of cellular component organization (GO:0051130)	4/107	0.45455	1	1.15917	0.913942	CDC20;TMED9;SRPX2;TAL1
negative regulation of I-kappaB kinase/NF-kappaB signaling (GO:0043124)	2/48	0.461271	1	1.29199	0.999701	C1QTNF3;CASP8
negative regulation of cellular biosynthetic process (GO:0031327)	2/48	0.461271	1	1.29199	0.999701	C1QTNF3;PLEK
fatty acid biosynthetic process (GO:0006633)	2/48	0.461271	1	1.29199	0.999701	XBP1;DEGS1
heterophilic cell-cell adhesion via plasma membrane cell adhesion molecules (GO:0007157)	2/48	0.461271	1	1.29199	0.999701	DCHS1;PVR
positive regulation of pathway-restricted SMAD protein phosphorylation (GO:0010862)	2/48	0.461271	1	1.29199	0.999701	SDCBP;INHBA
cellular response to starvation (GO:0009267)	4/108	0.46167	1	1.14844	0.887631	XBP1;CDKN1A;RALB;LAMP2
positive regulation of cell cycle process (GO:0090068)	4/108	0.46167	1	1.14844	0.887631	EDN1;ID2;IL1B;PDGFB
regulation of hematopoietic progenitor cell differentiation (GO:1901532)	3/78	0.462559	1	1.19261	0.919478	TAL1;TCF3;RUNX1
regulation of protein kinase A signaling (GO:0010738)	1/19	0.463738	1	1.63199	1.25408	MIF
primary alcohol metabolic process (GO:0034308)	1/19	0.463738	1	1.63199	1.25408	RDH12
regulation of sprouting angiogenesis (GO:1903670)	1/19	0.463738	1	1.63199	1.25408	ITGA5
negative regulation of cell junction assembly (GO:1901889)	1/19	0.463738	1	1.63199	1.25408	THBS1
protein targeting to lysosome (GO:0006622)	1/19	0.463738	1	1.63199	1.25408	LAMP2
positive regulation of STAT cascade (GO:1904894)	1/19	0.463738	1	1.63199	1.25408	IL7R
protein exit from endoplasmic reticulum (GO:0032527)	1/19	0.463738	1	1.63199	1.25408	HSP90B1
negative regulation of transposition (GO:0010529)	1/19	0.463738	1	1.63199	1.25408	PIWIL2
endothelial cell development (GO:0001885)	1/19	0.463738	1	1.63199	1.25408	STC1
regulation of myotube differentiation (GO:0010830)	1/19	0.463738	1	1.63199	1.25408	XBP1
purine ribonucleoside bisphosphate metabolic process (GO:0034035)	1/19	0.463738	1	1.63199	1.25408	TPST2
positive regulation of lipid storage (GO:0010884)	1/19	0.463738	1	1.63199	1.25408	C3
osteoclast differentiation (GO:0030316)	1/19	0.463738	1	1.63199	1.25408	TNFRSF11A
nucleosome disassembly (GO:0006337)	1/19	0.463738	1	1.63199	1.25408	NFE2
chromatin disassembly (GO:0031498)	1/19	0.463738	1	1.63199	1.25408	NFE2
leukotriene metabolic process (GO:0006691)	1/19	0.463738	1	1.63199	1.25408	ALOX5AP
striated muscle cell differentiation (GO:0051146)	1/19	0.463738	1	1.63199	1.25408	SDC1
histone deubiquitination (GO:0016578)	1/19	0.463738	1	1.63199	1.25408	TRRAP
fatty-acyl-CoA metabolic process (GO:0035337)	1/19	0.463738	1	1.63199	1.25408	FAR1
macromolecule biosynthetic process (GO:0009059)	1/19	0.463738	1	1.63199	1.25408	SLC11A1
positive regulation of immunoglobulin production (GO:0002639)	1/19	0.463738	1	1.63199	1.25408	XBP1
drug transport (GO:0015893)	1/19	0.463738	1	1.63199	1.25408	ABCC3
positive regulation of epithelial cell differentiation (GO:0030858)	1/19	0.463738	1	1.63199	1.25408	BTG1
regulation of cAMP biosynthetic process (GO:0030817)	1/19	0.463738	1	1.63199	1.25408	CAP1
positive regulation of transcription regulatory region DNA binding (GO:2000679)	1/19	0.463738	1	1.63199	1.25408	FAM129B
activin receptor signaling pathway (GO:0032924)	1/19	0.463738	1	1.63199	1.25408	INHBA
positive regulation of neuron apoptotic process (GO:0043525)	1/19	0.463738	1	1.63199	1.25408	CCL3
positive regulation of axon extension (GO:0045773)	1/19	0.463738	1	1.63199	1.25408	SEMA7A
negative regulation of hydrolase activity (GO:0051346)	4/109	0.468757	1	1.1379	0.862152	CSTB;DLG3;F11R;CPEB2
visual perception (GO:0007601)	3/79	0.470916	1	1.17751	0.886753	COL18A1;RDH12;RGS16
negative regulation of mitotic cell cycle (GO:0045930)	2/49	0.471981	1	1.26562	0.95025	BTG1;ZFP36L1
cytoplasmic microtubule organization (GO:0031122)	2/49	0.471981	1	1.26562	0.95025	PLK3;CLASP1
regulation of cell cycle arrest (GO:0071156)	2/49	0.471981	1	1.26562	0.95025	ID2;MIF
glycoprotein metabolic process (GO:0009100)	2/49	0.471981	1	1.26562	0.95025	GCNT1;ST8SIA4
regulation of primary metabolic process (GO:0080090)	5/140	0.472663	1	1.10742	0.82987	GLIPR1;ID2;FHL2;ANGPTL4;CTGF
negative regulation of protein kinase activity (GO:0006469)	4/110	0.47581	1	1.12755	0.837475	PTPN1;CDKN1A;MVP;BGN
negative regulation of sequence-specific DNA binding transcription factor activity (GO:0043433)	5/141	0.47888	1	1.09957	0.809616	IRAK2;ID2;FLNA;ARRB2;HAVCR2
response to calcium ion (GO:0051592)	3/80	0.479214	1	1.16279	0.855357	ALOX5AP;IQGAP1;THBS1
cell-cell junction assembly (GO:0007043)	3/80	0.479214	1	1.16279	0.855357	MICALL2;F11R;RHOC
negative regulation of innate immune response (GO:0045824)	1/20	0.481049	1	1.55039	1.13455	SERPING1
hydrogen peroxide metabolic process (GO:0042743)	1/20	0.481049	1	1.55039	1.13455	PRDX1
regulation of gluconeogenesis (GO:0006111)	1/20	0.481049	1	1.55039	1.13455	C1QTNF3
natural killer cell activation involved in immune response (GO:0002323)	1/20	0.481049	1	1.55039	1.13455	CORO1A
negative regulation of actin filament bundle assembly (GO:0032232)	1/20	0.481049	1	1.55039	1.13455	CLASP1
regulation of lipoprotein lipase activity (GO:0051004)	1/20	0.481049	1	1.55039	1.13455	ANGPTL4
response to progesterone (GO:0032570)	1/20	0.481049	1	1.55039	1.13455	THBS1
neuromuscular junction development (GO:0007528)	1/20	0.481049	1	1.55039	1.13455	F2R
calcium-independent cell-cell adhesion via plasma membrane cell-adhesion molecules (GO:0016338)	1/20	0.481049	1	1.55039	1.13455	CLDN2
axon extension (GO:0048675)	1/20	0.481049	1	1.55039	1.13455	SEMA3F
androgen metabolic process (GO:0008209)	1/20	0.481049	1	1.55039	1.13455	SPP1
adenylate cyclase-activating adrenergic receptor signaling pathway (GO:0071880)	1/20	0.481049	1	1.55039	1.13455	ADRA2A
autophagy of nucleus (GO:0044804)	1/20	0.481049	1	1.55039	1.13455	ATG2A
excitatory postsynaptic potential (GO:0060079)	1/20	0.481049	1	1.55039	1.13455	ARRB2
regulation of anoikis (GO:2000209)	1/20	0.481049	1	1.55039	1.13455	ITGA5
negative regulation of protein depolymerization (GO:1901880)	1/20	0.481049	1	1.55039	1.13455	CLASP1
glial cell development (GO:0021782)	1/20	0.481049	1	1.55039	1.13455	SOX11
striated muscle cell development (GO:0055002)	1/20	0.481049	1	1.55039	1.13455	SDC1
organelle disassembly (GO:1903008)	1/20	0.481049	1	1.55039	1.13455	PLK3
adrenergic receptor signaling pathway (GO:0071875)	1/20	0.481049	1	1.55039	1.13455	ADRA2A
inactivation of MAPK activity (GO:0000188)	1/20	0.481049	1	1.55039	1.13455	DUSP6
dorsal/ventral pattern formation (GO:0009953)	1/20	0.481049	1	1.55039	1.13455	DUSP6
inositol phosphate-mediated signaling (GO:0048016)	1/20	0.481049	1	1.55039	1.13455	EDN1
cellular response to steroid hormone stimulus (GO:0071383)	1/20	0.481049	1	1.55039	1.13455	ATP1A1
immune response-activating cell surface receptor signaling pathway (GO:0002429)	1/20	0.481049	1	1.55039	1.13455	FPR2
entrainment of circadian clock by photoperiod (GO:0043153)	1/20	0.481049	1	1.55039	1.13455	ID2
regulation of transport (GO:0051049)	1/20	0.481049	1	1.55039	1.13455	SLC2A1
organic hydroxy compound biosynthetic process (GO:1901617)	2/50	0.482561	1	1.24031	0.903748	SQLE;CYP7B1
antimicrobial humoral immune response mediated by antimicrobial peptide (GO:0061844)	2/50	0.482561	1	1.24031	0.903748	HMGN2;S100A9
regulation of release of sequestered calcium ion into cytosol (GO:0051279)	2/50	0.482561	1	1.24031	0.903748	F2R;SRI
post-translational protein modification (GO:0043687)	12/358	0.487173	1	1.03937	0.747445	C3;SOCS3;SPSB1;WSB1;CAND1;SPP1;TNC;P4HB;CP;SUMF2;KNG1;HSP90B1
spindle assembly (GO:0051225)	3/81	0.487451	1	1.14844	0.825225	BIRC5;FLNA;CLASP1
NIK/NF-kappaB signaling (GO:0038061)	3/81	0.487451	1	1.14844	0.825225	CHI3L1;CARD14;NFKB2
regulation of bone mineralization (GO:0030500)	2/51	0.49301	1	1.21599	0.85998	SRGN;CCL3
regulation of cellular protein metabolic process (GO:0032268)	2/51	0.49301	1	1.21599	0.85998	EDN1;INHBA
receptor internalization (GO:0031623)	2/51	0.49301	1	1.21599	0.85998	ADM;ARRB2
epidermis development (GO:0008544)	3/82	0.495624	1	1.13443	0.796298	UGCG;FABP5;CTGF
sensory perception of light stimulus (GO:0050953)	3/82	0.495624	1	1.13443	0.796298	COL18A1;RDH12;RGS16
positive regulation of binding (GO:0051099)	3/82	0.495624	1	1.13443	0.796298	RALB;PLAUR;MMP9
phosphatidylinositol metabolic process (GO:0046488)	4/113	0.496747	1	1.09762	0.767975	PI4K2B;INPP5F;INPP5D;PLEK
positive regulation of transcription from RNA polymerase II promoter involved in cellular response to chemical stimulus (GO:1901522)	1/21	0.497802	1	1.47656	1.02998	XBP1
regulation of interleukin-17 production (GO:0032660)	1/21	0.497802	1	1.47656	1.02998	MYD88
cortical actin cytoskeleton organization (GO:0030866)	1/21	0.497802	1	1.47656	1.02998	PLEK
mesoderm development (GO:0007498)	1/21	0.497802	1	1.47656	1.02998	MEST
establishment of spindle orientation (GO:0051294)	1/21	0.497802	1	1.47656	1.02998	CLASP1
ventricular cardiac muscle tissue development (GO:0003229)	1/21	0.497802	1	1.47656	1.02998	TPM1
positive regulation of T cell mediated immunity (GO:0002711)	1/21	0.497802	1	1.47656	1.02998	IL1B
regulation of cardiac muscle hypertrophy (GO:0010611)	1/21	0.497802	1	1.47656	1.02998	EDN1
positive regulation of histone acetylation (GO:0035066)	1/21	0.497802	1	1.47656	1.02998	IL1B
protein O-linked glycosylation via threonine (GO:0018243)	1/21	0.497802	1	1.47656	1.02998	GALNT10
establishment of endothelial barrier (GO:0061028)	1/21	0.497802	1	1.47656	1.02998	F11R
vesicle docking (GO:0048278)	1/21	0.497802	1	1.47656	1.02998	STX11
regulation of nuclear division (GO:0051783)	1/21	0.497802	1	1.47656	1.02998	MKI67
ventricular septum morphogenesis (GO:0060412)	1/21	0.497802	1	1.47656	1.02998	SOX11
negative regulation of viral process (GO:0048525)	1/21	0.497802	1	1.47656	1.02998	ZFP36
meiosis I (GO:0007127)	1/21	0.497802	1	1.47656	1.02998	BCL2L11
protein-DNA complex disassembly (GO:0032986)	1/21	0.497802	1	1.47656	1.02998	NFE2
negative regulation of cyclin-dependent protein kinase activity (GO:1904030)	1/21	0.497802	1	1.47656	1.02998	CDKN1A
positive regulation of lipid metabolic process (GO:0045834)	1/21	0.497802	1	1.47656	1.02998	IL1B
positive regulation of receptor internalization (GO:0002092)	1/21	0.497802	1	1.47656	1.02998	ARRB2
photoperiodism (GO:0009648)	1/21	0.497802	1	1.47656	1.02998	ID2
ERK1 and ERK2 cascade (GO:0070371)	1/21	0.497802	1	1.47656	1.02998	ZFP36L1
synaptic transmission, glutamatergic (GO:0035249)	1/21	0.497802	1	1.47656	1.02998	SLC1A4
negative regulation of cell cycle arrest (GO:0071157)	1/21	0.497802	1	1.47656	1.02998	MIF
hepaticobiliary system development (GO:0061008)	1/21	0.497802	1	1.47656	1.02998	XBP1
glutamate metabolic process (GO:0006536)	1/21	0.497802	1	1.47656	1.02998	GAD1
regulation of intracellular signal transduction (GO:1902531)	14/423	0.499001	1	1.02626	0.713402	PLK3;BRPF1;PLEKHG2;ARHGAP29;INHBA;RHOC;PRKAB1;RHOB;ABR;IL1B;DDIT4;SRGAP3;ARHGEF5;IER3
cellular protein metabolic process (GO:0044267)	16/485	0.499133	1	1.02294	0.710821	NAPSA;F10;ABCA3;TNC;PLOD2;CP;GSPT2;CSF2RA;KNG1;HSP90B1;C3;ADPRH;SPP1;ST8SIA4;SAA1;P4HB
regulation of exocytosis (GO:0017157)	2/52	0.503324	1	1.19261	0.81875	RALB;CLASP1
positive regulation of actin filament polymerization (GO:0030838)	2/52	0.503324	1	1.19261	0.81875	CDC42EP4;ARPC4
negative regulation of NF-kappaB transcription factor activity (GO:0032088)	3/83	0.503732	1	1.12076	0.768519	IRAK2;ARRB2;HAVCR2
positive regulation of cell cycle (GO:0045787)	3/83	0.503732	1	1.12076	0.768519	TAL1;PDGFB;MIF
positive regulation of cell cycle arrest (GO:0071158)	3/83	0.503732	1	1.12076	0.768519	PLK3;CDKN1A;ID2
establishment of protein localization to membrane (GO:0090150)	3/84	0.511772	1	1.10742	0.741835	SDCBP;BID;SEC63
positive regulation of protein ubiquitination (GO:0031398)	3/84	0.511772	1	1.10742	0.741835	ARRDC3;ARRB2;BCL10
negative regulation of neuron death (GO:1901215)	3/84	0.511772	1	1.10742	0.741835	F2R;CCL2;ADAM8
protein maturation (GO:0051604)	3/84	0.511772	1	1.10742	0.741835	SRGN;ASPRV1;CTSS
positive regulation of ossification (GO:0045778)	2/53	0.513501	1	1.1701	0.779878	IFITM1;SOX11
regulation of cell-matrix adhesion (GO:0001952)	2/53	0.513501	1	1.1701	0.779878	THBS1;CLASP1
positive regulation of protein autophosphorylation (GO:0031954)	1/22	0.514015	1	1.40944	0.93799	PDGFB
acylglycerol homeostasis (GO:0055090)	1/22	0.514015	1	1.40944	0.93799	ANGPTL4
glutathione derivative biosynthetic process (GO:1901687)	1/22	0.514015	1	1.40944	0.93799	GSTO2
cellular response to hexose stimulus (GO:0071331)	1/22	0.514015	1	1.40944	0.93799	XBP1
positive regulation of proteolysis involved in cellular protein catabolic process (GO:1903052)	1/22	0.514015	1	1.40944	0.93799	CTSC
lymphocyte activation involved in immune response (GO:0002285)	1/22	0.514015	1	1.40944	0.93799	LCP1
negative regulation of cell cycle G1/S phase transition (GO:1902807)	1/22	0.514015	1	1.40944	0.93799	CDKN1A
embryonic skeletal system morphogenesis (GO:0048704)	1/22	0.514015	1	1.40944	0.93799	SOX11
negative regulation of sprouting angiogenesis (GO:1903671)	1/22	0.514015	1	1.40944	0.93799	THBS1
protein localization to cell surface (GO:0034394)	1/22	0.514015	1	1.40944	0.93799	FLNA
triglyceride catabolic process (GO:0019433)	1/22	0.514015	1	1.40944	0.93799	FABP5
regulation of microtubule depolymerization (GO:0031114)	1/22	0.514015	1	1.40944	0.93799	CLASP1
protein O-linked glycosylation via serine (GO:0018242)	1/22	0.514015	1	1.40944	0.93799	GALNT10
urogenital system development (GO:0001655)	1/22	0.514015	1	1.40944	0.93799	ITGA6
protein complex localization (GO:0031503)	1/22	0.514015	1	1.40944	0.93799	BIRC5
viral genome replication (GO:0019079)	1/22	0.514015	1	1.40944	0.93799	CCL2
positive regulation of RNA splicing (GO:0033120)	1/22	0.514015	1	1.40944	0.93799	HSPA1A
regulation of monocyte chemotaxis (GO:0090025)	1/22	0.514015	1	1.40944	0.93799	FPR2
glutathione derivative metabolic process (GO:1901685)	1/22	0.514015	1	1.40944	0.93799	GSTO2
regulation of insulin secretion involved in cellular response to glucose stimulus (GO:0061178)	1/22	0.514015	1	1.40944	0.93799	ADRA2A
digestive system development (GO:0055123)	1/22	0.514015	1	1.40944	0.93799	ITGA6
protein modification process (GO:0036211)	3/85	0.519742	1	1.09439	0.716194	ADPRH;ST8SIA4;PLOD2
monocarboxylic acid transport (GO:0015718)	2/54	0.523539	1	1.14844	0.743202	ABCC3;SLC10A4
positive regulation of protein import into nucleus (GO:0042307)	2/54	0.523539	1	1.14844	0.743202	F2R;FLNA
regulation of macroautophagy (GO:0016241)	4/117	0.52409	1	1.06009	0.684918	ATP6V1A;BNIP3L;ATP6V1H;PRKAB1
sphingolipid metabolic process (GO:0006665)	4/117	0.52409	1	1.06009	0.684918	UGCG;GM2A;B4GALNT1;DEGS1
cholesterol efflux (GO:0033344)	1/23	0.529705	1	1.34816	0.856671	SOAT1
regulation of proteolysis involved in cellular protein catabolic process (GO:1903050)	1/23	0.529705	1	1.34816	0.856671	CTSC
lamellipodium assembly (GO:0030032)	1/23	0.529705	1	1.34816	0.856671	SPATA13
peroxisome organization (GO:0007031)	1/23	0.529705	1	1.34816	0.856671	PEX12
positive regulation of ATP metabolic process (GO:1903580)	1/23	0.529705	1	1.34816	0.856671	ENO1
regulation of smooth muscle contraction (GO:0006940)	1/23	0.529705	1	1.34816	0.856671	F2R
autophagosome maturation (GO:0097352)	1/23	0.529705	1	1.34816	0.856671	LAMP2
regulation of monooxygenase activity (GO:0032768)	1/23	0.529705	1	1.34816	0.856671	IL1B
regulation of release of sequestered calcium ion into cytosol by sarcoplasmic reticulum (GO:0010880)	1/23	0.529705	1	1.34816	0.856671	SRI
regulation of microtubule cytoskeleton organization (GO:0070507)	1/23	0.529705	1	1.34816	0.856671	CLASP1
regulation of chondrocyte differentiation (GO:0032330)	1/23	0.529705	1	1.34816	0.856671	ADAMTS7
protein localization to cell periphery (GO:1990778)	4/118	0.530815	1	1.05111	0.665713	FLNA;ATP1B3;F11R;RAPGEF6
cell morphogenesis involved in differentiation (GO:0000904)	2/55	0.533438	1	1.12755	0.70857	ACTN1;MICALL2
action potential (GO:0001508)	2/55	0.533438	1	1.12755	0.70857	SRI;YWHAH
membrane fusion (GO:0061025)	2/55	0.533438	1	1.12755	0.70857	SNAP23;STX11
negative regulation of supramolecular fiber organization (GO:1902904)	2/55	0.533438	1	1.12755	0.70857	CORO1A;CLASP1
brain development (GO:0007420)	4/120	0.544121	1	1.03359	0.629027	CNTNAP2;COL4A1;B3GNT5;DDIT4
phospholipid dephosphorylation (GO:0046839)	1/24	0.544889	1	1.29199	0.784461	INPP5F
regulation of androgen receptor signaling pathway (GO:0060765)	1/24	0.544889	1	1.29199	0.784461	ARRB2
cellular protein modification process (GO:0006464)	32/1002	0.549359	1	0.990268	0.593173	PDGFB;TNC;PLOD2;THBS1;KNG1;FUT4;HSP90B1;C3;SOCS3;CAND1;IRAK2;AKT3;GCNT2;SPP1;ST8SIA4;CCL2;MAP4K4;PTPN1;WSB1;PLAUR;PRKAB1;CP;DUSP6;SUMF2;CTTNBP2NL;PTPRE;ZAP70;SPSB1;B3GNT5;ADPRH;BIRC5;P4HB
enzyme linked receptor protein signaling pathway (GO:0007167)	4/121	0.550701	1	1.02505	0.611508	ZAP70;NEDD9;PILRA;RASGRP4
regulation of stem cell differentiation (GO:2000736)	3/89	0.550898	1	1.04521	0.623157	TAL1;TCF3;RUNX1
regulation of proteasomal ubiquitin-dependent protein catabolic process (GO:0032434)	3/89	0.550898	1	1.04521	0.623157	SDCBP;HSPA1B;HSPA1A
chordate embryonic development (GO:0043009)	2/57	0.552808	1	1.08799	0.644902	ALDH1A2;SULF1
regulation of BMP signaling pathway (GO:0030510)	2/57	0.552808	1	1.08799	0.644902	SOX11;SULF1
positive regulation of histone methylation (GO:0031062)	1/25	0.559584	1	1.24031	0.720076	MTF2
positive regulation of immune effector process (GO:0002699)	1/25	0.559584	1	1.24031	0.720076	XBP1
regulation of chromosome organization (GO:0033044)	1/25	0.559584	1	1.24031	0.720076	MKI67
positive regulation of purine nucleotide biosynthetic process (GO:1900373)	1/25	0.559584	1	1.24031	0.720076	ENO1
cellular modified amino acid biosynthetic process (GO:0042398)	1/25	0.559584	1	1.24031	0.720076	PLOD2
negative regulation of developmental growth (GO:0048640)	1/25	0.559584	1	1.24031	0.720076	WWC2
negative regulation of sequestering of calcium ion (GO:0051283)	1/25	0.559584	1	1.24031	0.720076	F2R
macromolecule modification (GO:0043412)	1/25	0.559584	1	1.24031	0.720076	ST6GALNAC4
positive regulation of microtubule polymerization or depolymerization (GO:0031112)	1/25	0.559584	1	1.24031	0.720076	CLASP1
regulation of transmembrane transport (GO:0034762)	1/25	0.559584	1	1.24031	0.720076	CTTNBP2NL
negative regulation of endothelial cell apoptotic process (GO:2000352)	1/25	0.559584	1	1.24031	0.720076	TNIP2
negative regulation of interleukin-6 production (GO:0032715)	1/25	0.559584	1	1.24031	0.720076	C1QTNF3
fatty acid derivative biosynthetic process (GO:1901570)	1/25	0.559584	1	1.24031	0.720076	FAR1
regulation of cardiac muscle cell action potential (GO:0098901)	1/25	0.559584	1	1.24031	0.720076	FLNA
transition metal ion homeostasis (GO:0055076)	1/25	0.559584	1	1.24031	0.720076	SLC11A1
negative regulation of proteasomal ubiquitin-dependent protein catabolic process (GO:0032435)	1/25	0.559584	1	1.24031	0.720076	SDCBP
regulation of cell cycle G1/S phase transition (GO:1902806)	1/25	0.559584	1	1.24031	0.720076	ID2
cAMP metabolic process (GO:0046058)	1/25	0.559584	1	1.24031	0.720076	ADM
regulation of Rho protein signal transduction (GO:0035023)	2/58	0.562277	1	1.06923	0.615621	GPR35;F2R
regulation of neurogenesis (GO:0050767)	2/58	0.562277	1	1.06923	0.615621	SOX11;YWHAH
ion transmembrane transport (GO:0034220)	7/220	0.567865	1	0.98661	0.558294	ATP6V1A;ATP6V1H;ATP1B3;ATP2B2;TCIRG1;ATP1A1;ATP7A
vesicle-mediated transport (GO:0016192)	13/411	0.568216	1	0.98078	0.55439	USP6NL;NCF4;SNAP23;STX11;RHOB;ARL4C;SNX18;EHD4;ADAP2;MICALL2;ATP6V1H;STEAP2;LRP12
intracellular protein transport (GO:0006886)	11/348	0.570033	1	0.98013	0.550892	USP6NL;MMP12;TMED9;APPBP2;ADPRH;STAT3;LAMP2;BCL3;TBC1D9;STX11;YWHAH
receptor metabolic process (GO:0043112)	2/59	0.571603	1	1.05111	0.587898	ADM;ARRB2
post-Golgi vesicle-mediated transport (GO:0006892)	2/59	0.571603	1	1.05111	0.587898	SNAP23;STEAP2
lipid transport (GO:0006869)	3/92	0.573464	1	1.01112	0.562244	ABCC3;SLC10A4;ABCA3
heterotypic cell-cell adhesion (GO:0034113)	1/26	0.573805	1	1.19261	0.662451	ITGA5
signal peptide processing (GO:0006465)	1/26	0.573805	1	1.19261	0.662451	F10
protein import into nucleus, translocation (GO:0000060)	1/26	0.573805	1	1.19261	0.662451	BCL3
lamellipodium organization (GO:0097581)	1/26	0.573805	1	1.19261	0.662451	SPATA13
negative regulation of gene expression, epigenetic (GO:0045814)	1/26	0.573805	1	1.19261	0.662451	MTF2
neutral amino acid transport (GO:0015804)	1/26	0.573805	1	1.19261	0.662451	SLC1A4
regulation of ryanodine-sensitive calcium-release channel activity (GO:0060314)	1/26	0.573805	1	1.19261	0.662451	SRI
regulation of interleukin-10 production (GO:0032653)	1/26	0.573805	1	1.19261	0.662451	FCGR2B
positive regulation of leukocyte mediated cytotoxicity (GO:0001912)	1/26	0.573805	1	1.19261	0.662451	PVR
positive regulation of glucose transport (GO:0010828)	1/26	0.573805	1	1.19261	0.662451	C3
positive regulation of interleukin-1 beta secretion (GO:0050718)	1/26	0.573805	1	1.19261	0.662451	CCL3
female gamete generation (GO:0007292)	1/26	0.573805	1	1.19261	0.662451	PIWIL2
regulation of apoptotic signaling pathway (GO:2001233)	1/26	0.573805	1	1.19261	0.662451	TRAF1
regulation of potassium ion transmembrane transporter activity (GO:1901016)	1/26	0.573805	1	1.19261	0.662451	ATP1B3
respiratory tube development (GO:0030323)	1/26	0.573805	1	1.19261	0.662451	CHI3L1
peptide hormone secretion (GO:0030072)	1/26	0.573805	1	1.19261	0.662451	EDN1
[truncated: 566 more rows]

## Sheet: Week 6 Up
BP GO Term	Overlap	P-value	Adjusted P-value	Odds Ratio	Combined Score	Genes	CC GO Term	Overlap	P-value	Adjusted P-value	Odds Ratio	Combined Score	Genes			MF GO Term	Overlap	P-value	Adjusted P-value	Odds Ratio	Combined Score	Genes
regulation of cell migration (GO:0030334)	55/317	1.52471e-10	7.78061e-07	2.53102	57.2113	IFITM1;CLIC4;ROBO4;PLXND1;PIK3CD;PTPRK;LDB2;CX3CL1;CYR61;ROBO1;CXCL16;IGF1R;SLK;PDGFRB;EDN1;IGFBP5;LMO4;F2R;ACTN4;MMP9;TGFBR1;TIAM1;MMP14;ADAM15;IL1B;SPATA13;MYADM;NUMB;MAPRE1;ENG;MACF1;CSF1R;NOTCH1;PRKX;SEMA3F;EGFR;SDCBP;CCL7;LMNA;GCNT2;CCL3;SRGAP3;SPAG9;SEMA4A;TGFB1;F10;SULF1;SORL1;COL1A1;IGSF10;DAB2;CXCL12;DLG5;PLXNB2;FERMT3	focal adhesion (GO:0005925)	61/357	2.92693e-11	1.30541e-08	2.49261	60.4569	NRP1;TES;TGFB1I1;TNC;SLC4A2;PVR;ACTB;ICAM1;GJA1;LASP1;CAPN5;CFL1;ANXA6;RAC2;B2M;TNS3;TGM2;NUP214;PDGFRB;PPP1R12A;TPM4;RPL23;ACTN1;RHOG;PLAUR;ACTN4;HSPG2;YWHAZ;MMP14;PALLD;NUMB;MYH9;ARHGEF2;ITGA5;LCP1;CD44;ENG;AHNAK;IQGAP1;LPP;EGFR;SLC9A1;GNA13;NCSTN;CTNNA1;FLNB;PIP5K1C;PDLIM7;GIT2;MCAM;HMGA1;MSN;IGF2R;DAB2;ITGA11;FAT1;ZYX;PI4KA;VIM;HSPA1A;SNTB2			cadherin binding (GO:0045296)	39/314	0.00023268	0.267815	1.81187	15.1578	MACF1;TES;AHNAK;ARHGAP1;UBFD1;ENO1;IQGAP1;FNBP1L;EGFR;FAM129B;GOLGA3;CDH5;SDCBP;LASP1;SLK;CTNNA1;EIF4H;FLNB;WASF2;S100A11;MARK2;LYPLA2;ANXA2;SWAP70;SCRIB;RANGAP1;YWHAZ;RAB11B;TMEM2;TBC1D2;EHD4;FSCN1;PI4KA;NUMB;MYH9;TAGLN2;FXYD5;MAPRE1;HSPA1A
neutrophil degranulation (GO:0043312)	70/480	1.52048e-09	3.8795e-06	2.1274	43.1953	CXCL1;TCIRG1;ORM2;CTSS;SIRPB1;LGALS3;HK3;PSMD7;GM2A;ANPEP;LAMP2;CLEC5A;COTL1;SIRPA;B2M;CD33;CTSC;CD177;HGSNAT;ANXA2;APAF1;CD93;ARG1;PGAM1;SLC11A1;ATP6AP2;RHOG;PLAUR;KCNAB2;AMPD3;SCAMP1;TNFRSF1B;MMP9;CLEC4D;DOK3;DNAJC5;CHI3L1;ADAM8;PLEKHO2;CD47;S100A8;CD44;TLR2;CSTB;CD63;RAB5B;STXBP3;MVP;STXBP2;PRCP;FPR2;IQGAP1;GPR84;GNS;C3;SDCBP;NCSTN;CYB5R3;PSAP;NCKAP1L;CD14;S100A11;DYNC1H1;STK11IP;NFKB1;IGF2R;G…	lysosome (GO:0005764)	59/423	1.45283e-07	3.23982e-05	2.03472	32.0358	PI4K2B;ECE1;TCIRG1;LITAF;SPPL3;CTSS;GM2A;HYAL1;ANPEP;LAMP2;ANXA6;ANKFY1;IDS;ENPP1;ACP2;CTSC;SRGN;HGSNAT;ANXA2;DTX3L;SPHK2;SLC11A1;BGN;AP1B1;HSPG2;DCN;NPC1;HGS;DNAJC5;ATP6V1B2;SLC29A3;SIDT2;CD63;AHNAK;STXBP2;SDC3;GBA;TGFBRAP1;PRELP;GNS;CLN3;NCSTN;PSAP;SLC15A3;CD74;NAPSA;STK11IP;LAPTM5;AP3D1;MYO5A;CP;TPCN2;TPCN1;GALNS;DAB2;GNB1;SDC1;AGRN;LGMN			actin filament binding (GO:0051015)	19/128	0.0011484	0.660904	2.16539	14.6584	MACF1;HIP1;TPM4;TPM3;ACTN1;SHROOM3;ACTN4;ANTXR1;CORO1A;AIF1;EGFR;MYO1E;SAMD14;FMNL1;CFL1;FSCN1;MYH8;MYH9;LCP1
neutrophil activation involved in immune response (GO:0002283)	70/484	2.17465e-09	3.69908e-06	2.10982	42.0833	CXCL1;TCIRG1;ORM2;CTSS;SIRPB1;LGALS3;HK3;PSMD7;GM2A;ANPEP;LAMP2;CLEC5A;COTL1;SIRPA;B2M;CD33;CTSC;CD177;HGSNAT;ANXA2;APAF1;CD93;ARG1;PGAM1;SLC11A1;ATP6AP2;RHOG;PLAUR;KCNAB2;AMPD3;SCAMP1;TNFRSF1B;MMP9;CLEC4D;DOK3;DNAJC5;CHI3L1;ADAM8;PLEKHO2;CD47;S100A8;CD44;TLR2;CSTB;CD63;RAB5B;STXBP3;MVP;STXBP2;PRCP;FPR2;IQGAP1;GPR84;GNS;C3;SDCBP;NCSTN;CYB5R3;PSAP;NCKAP1L;CD14;S100A11;DYNC1H1;STK11IP;NFKB1;IGF2R;G…	lytic vacuole membrane (GO:0098852)	35/234	1.06715e-05	0.0015865	2.18195	24.9788	PI4K2B;CD63;AHNAK;GBA;TGFBRAP1;ECE1;TCIRG1;LITAF;SPPL3;CLN3;NCSTN;ANPEP;LAMP2;PSAP;ANXA6;ANKFY1;ENPP1;SLC15A3;CD74;HGSNAT;ANXA2;STK11IP;SPHK2;AP1B1;AP3D1;CP;TPCN2;TPCN1;DAB2;NPC1;DNAJC5;GNB1;ATP6V1B2;SLC29A3;SIDT2			integrin binding (GO:0005178)	15/95	0.00197033	0.755949	2.30335	14.3489	ACTN1;FN1;ACTN4;CX3CL1;CYR61;WISP1;CTGF;ICAM1;CXCL12;ADAM15;IL1B;ANXA7;LCP1;CD177;FERMT3
neutrophil mediated immunity (GO:0002446)	70/488	3.09293e-09	3.94581e-06	2.09253	41.0013	CXCL1;TCIRG1;ORM2;CTSS;SIRPB1;LGALS3;HK3;PSMD7;GM2A;ANPEP;LAMP2;CLEC5A;COTL1;SIRPA;B2M;CD33;CTSC;CD177;HGSNAT;ANXA2;APAF1;CD93;ARG1;PGAM1;SLC11A1;ATP6AP2;RHOG;PLAUR;KCNAB2;AMPD3;SCAMP1;TNFRSF1B;MMP9;CLEC4D;DOK3;DNAJC5;CHI3L1;ADAM8;PLEKHO2;CD47;S100A8;CD44;TLR2;CSTB;CD63;RAB5B;STXBP3;MVP;STXBP2;PRCP;FPR2;IQGAP1;GPR84;GNS;C3;SDCBP;NCSTN;CYB5R3;PSAP;NCKAP1L;CD14;S100A11;DYNC1H1;STK11IP;NFKB1;IGF2R;G…	vacuolar lumen (GO:0005775)	27/162	1.49566e-05	0.00166766	2.43132	27.0128	SDC3;GBA;PRELP;GNS;ORM2;CTSS;C3;SDCBP;CYB5R3;GM2A;HYAL1;LAMP2;PSAP;IDS;CTSC;CD74;DYNC1H1;ANXA2;STK11IP;ARG1;BGN;HSPG2;DCN;GALNS;SDC1;AGRN;LGMN			GTPase activator activity (GO:0005096)	30/250	0.00199389	0.573741	1.75055	10.8843	USP6NL;ERRFI1;NRP1;DOCK4;TBC1D9B;ARHGAP1;AGAP1;IQGAP1;RASAL2;SYDE1;ADAP2;RGS1;NCKAP1L;SRGAP3;GIT2;RALBP1;TBCD;TBC1D9;MYO9B;GMIP;RANGAP1;MYO9A;ARHGAP25;TBC1D1;TBC1D2;ARHGAP30;TBC1D5;RASA1;RGS11;LLGL1
cytokine-mediated signaling pathway (GO:0019221)	84/634	4.00743e-09	4.08998e-06	1.93278	37.3705	IFITM3;CDKN1A;CIITA;IFITM1;IL1RN;PLVAP;CSF3R;IFITM2;PIK3CD;CXCL1;ADAR;IL1RAP;CXCL2;CX3CL1;TNFSF13B;ICAM1;LMNB1;TRIM8;RPS6KA4;PSMD7;CCND1;CFL1;TIMP1;CCR5;JUNB;B2M;IL11;ANXA2;GPR35;IL1R2;MMP2;MMP3;BGN;IRAK3;TNFRSF1B;OSMR;MMP9;YWHAZ;VAV1;DCN;TNFRSF1A;TRAF3;IL1B;IRF1;FSCN1;LCP1;CARD14;CD44;CSF1R;SHC1;PIK3R1;LRP8;FOXO1;RELA;SOCS3;CCL7;FLRT3;CCL4;CCL3;CCL2;NCAM1;CD300LF;MAP3K3;TGFB1;POU2F1;TNFSF14;IL10…	lysosomal lumen (GO:0043202)	18/87	2.05321e-05	0.00183147	3.01818	32.5768	CD74;SDC3;GBA;BGN;PRELP;HSPG2;GNS;CTSS;DCN;GALNS;GM2A;HYAL1;LAMP2;PSAP;IDS;SDC1;AGRN;LGMN			collagen binding (GO:0005518)	10/53	0.00287512	0.661852	2.75243	16.1063	MMP13;ITGA11;FN1;TGFBI;NID1;ANTXR1;MMP9;NID2;CTSS;CD44
extracellular matrix organization (GO:0030198)	42/230	4.73003e-09	4.02289e-06	2.66388	51.0647	APP;COL18A1;COL12A1;TNC;FURIN;LAMC1;NID1;NID2;CTSS;ICAM1;ADAMTS4;SH3PXD2B;SPP1;TIMP1;CSGALNACT1;TGFB1;EXOC8;MMP2;MMP3;FN1;BGN;HSPG2;MMP9;MMP10;TGFBR1;DCN;COL1A1;MMP14;MMP13;ADAM15;COL4A2;LOX;COL4A1;ITGA11;MFAP2;ADAM8;CD47;TGFBI;ITGA5;LCP1;AGRN;CD44	tertiary granule (GO:0070820)	27/165	2.10269e-05	0.001563	2.38711	25.7085	CSTB;STXBP3;STXBP2;CXCL1;PRCP;GPR84;FPR2;TCIRG1;CTSS;LGALS3;LAMP2;CLEC5A;SIRPA;NCKAP1L;B2M;CD33;CD177;HGSNAT;CD93;SLC11A1;ATP6AP2;KCNAB2;MMP9;CLEC4D;DOK3;ADAM8;CD47			phosphotyrosine residue binding (GO:0001784)	7/30	0.00352399	0.676019	3.40384	19.2254	SHC1;RASA1;PLCG2;PIK3R1;SAMSN1;VAV1;VAV2
positive regulation of cell migration (GO:0030335)	41/222	5.11534e-09	3.72909e-06	2.69416	51.4343	NRP1;CSF1R;NOTCH1;PIK3CD;SEMA3F;EGFR;CYR61;PPM1F;CXCL16;IGF1R;SYDE1;SDCBP;NIPBL;CCL7;HYAL1;GCNT2;CCL3;RREB1;PDGFRB;SPAG9;SEMA4A;EDN1;TGFB1;F10;F2R;FN1;GAB1;ACTN4;MMP9;TGFBR1;COL1A1;TIAM1;MMP14;DAB2;CXCL12;IL1B;MYADM;NUMB;ARHGEF2;MAPRE1;FERMT3	lysosomal membrane (GO:0005765)	38/292	0.000106144	0.00676286	1.89842	17.3719	PI4K2B;CD63;AHNAK;GBA;TGFBRAP1;CLTA;ECE1;PRCP;TCIRG1;LITAF;SPPL3;CLN3;NCSTN;ANPEP;LAMP2;PSAP;ANXA6;ANKFY1;ENPP1;SLC15A3;CD74;HGSNAT;ANXA2;STK11IP;SPHK2;AP1B1;AP3D1;AP2B1;CP;TPCN2;TPCN1;DAB2;NPC1;DNAJC5;GNB1;ATP6V1B2;SLC29A3;SIDT2			Ras GTPase binding (GO:0017016)	23/185	0.00406761	0.668831	1.81363	9.98349	USP6NL;RALBP1;TBC1D9B;ATP6AP1;EXOC8;SPHK2;MAPKAP1;ARHGAP1;MYO5A;TBC1D9;MYO9B;RANGAP1;YBX3;BICD2;TBC1D1;TBC1D2;RUSC2;TBC1D5;ANKFY1;RIN3;ARHGEF2;LLGL1;RAB11FIP5
cellular response to cytokine stimulus (GO:0071345)	66/457	6.65731e-09	4.24653e-06	2.10679	39.6656	CDKN1A;IL1RN;CSF3R;PIK3CD;CXCL1;IL1RAP;CXCL2;YBX3;CX3CL1;ICAM1;ZFP36;CCND1;HYAL1;ANKRD1;TIMP1;CCR5;JUNB;UPF1;IL11;IL1R2;MMP2;MMP3;BGN;IRAK3;TNFRSF1B;OSMR;MMP9;YWHAZ;VAV1;DCN;TNFRSF1A;IL1B;IRF1;FSCN1;CHI3L1;ARHGEF2;CSF1R;SELPLG;SHC1;PDE1B;GBA;PIK3R1;ADAMTS12;LRP8;AIF1;FOXO1;RELA;ZFP36L1;SOCS3;CCL7;FLRT3;CCL4;CCL3;CCL2;TGFB1;POU2F1;IL10RB;IL10RA;STAT3;FN1;OSM;NFKB1;LCN2;SAA1;SDC1;VIM	platelet alpha granule (GO:0031091)	17/91	0.000132797	0.00740343	2.72521	24.3271	SRGN;APP;TGFB1;STXBP3;ACTN1;STXBP1;FN1;ACTN4;LHFPL2;THBS2;ORM2;KNG1;F5;SELP;SERPING1;TIMP1;FERMT3			chemokine activity (GO:0008009)	9/47	0.00414453	0.596294	2.79343	15.3246	CXCL12;CCL7;CCL4;CCL3;CCL2;CXCL1;CXCL2;CX3CL1;CXCL16
extracellular matrix disassembly (GO:0022617)	22/79	9.30038e-09	5.27332e-06	4.06245	75.1278	EXOC8;MMP2;MMP3;FN1;FURIN;LAMC1;NID1;MMP9;HSPG2;CTSS;MMP10;DCN;ADAMTS4;MMP14;MMP13;ADAM15;SH3PXD2B;SPP1;ADAM8;TIMP1;LCP1;CD44	ficolin-1-rich granule (GO:0101002)	27/185	0.000158631	0.00786104	2.12904	18.6269	CSTB;MVP;PRCP;FPR2;TCIRG1;GNS;CTSS;LGALS3;HK3;PSMD7;LAMP2;COTL1;SIRPA;NCKAP1L;CD93;APAF1;SLC11A1;PGAM1;ATP6AP2;AMPD3;MMP9;PFKL;CLEC4D;DOK3;ADAM8;PLEKHO2;HSPA1A			metallopeptidase activity (GO:0008237)	15/103	0.0043719	0.559117	2.12445	11.5412	MMP2;MMP3;ECE1;ADAMTS12;MYSM1;MMP9;MMP10;ADAMTS4;ADAMTS2;MMP14;MMP13;ADAM15;ANPEP;RNPEP;ADAM8
positive regulation of gene expression (GO:0010628)	92/772	1.28474e-07	6.55605e-05	1.73845	27.585	APP;CIITA;TGFB1I1;PIK3CD;BRCA2;ACTB;ETS2;GLI3;GLI2;MED12;TRIM28;SOX18;CREB3L2;EPC1;EP300;EPHB2;SOX4;DDX17;SMARCC1;DTX3L;RPL23;SLC11A1;F2R;RHOG;SOX11;EBF3;ARID1A;TGFBR1;PIAS1;OLFM1;PLSCR1;KAT2A;POLR1A;TBL1XR1;HGS;IL1B;IRF1;TLR6;TLR4;CREB5;TLR2;RBMS3;BLM;DNMT1;NOTCH1;SHC1;NOTCH4;CXXC1;DDX21;PIK3R1;EGFR;FOXO1;PPM1F;RELA;CAMKK2;FAM129B;POLR2A;UBR5;SPP1;CCL3;DVL2;HIVEP3;RREB1;ATF7IP;CD74;CREBBP;ZFHX3;…	ficolin-1-rich granule membrane (GO:0101003)	13/62	0.000245257	0.0109385	3.05875	25.428	CD93;SLC11A1;ATP6AP2;PRCP;TCIRG1;FPR2;LGALS3;CLEC4D;DOK3;LAMP2;SIRPA;ADAM8;NCKAP1L			GTPase regulator activity (GO:0030695)	31/276	0.00465681	0.535998	1.6385	8.79778	USP6NL;CDC42SE1;ERRFI1;NRP1;DOCK4;TBC1D9B;ARHGAP1;AGAP1;IQGAP1;RASAL2;SYDE1;ADAP2;RGS1;NCKAP1L;SRGAP3;GIT2;RALBP1;TBCD;TBC1D9;MYO9B;GMIP;RANGAP1;MYO9A;ARHGAP25;TBC1D1;TBC1D2;ARHGAP30;TBC1D5;RASA1;RGS11;LLGL1
positive regulation of epithelial to mesenchymal transition (GO:0010718)	14/41	2.87949e-07	0.000133582	4.98123	75.0198	NOTCH1;TGFB1;TGFB1I1;TGFBR1;TGFBR2;COL1A1;SDCBP;TIAM1;OLFM1;DAB2;IL1B;GCNT2;BCL9L;ENG	specific granule (GO:0042581)	24/161	0.000259889	0.0105373	2.17459	17.9518	HGSNAT;CD93;STXBP3;ARG1;STXBP2;PLAUR;CXCL1;GPR84;FPR2;KCNAB2;SCAMP1;TNFRSF1B;ORM2;NFKB1;CLEC4D;DNAJC5;CLEC5A;LCN2;CHI3L1;ADAM8;CD47;B2M;CD33;CD177			metalloendopeptidase activity (GO:0004222)	11/66	0.00494533	0.517462	2.43132	12.9086	ADAMTS4;ADAMTS2;MMP14;MMP13;ADAM15;MMP2;MMP3;ECE1;ADAMTS12;MMP9;MMP10
positive regulation of cell motility (GO:2000147)	32/180	5.86781e-07	0.000249529	2.5934	37.2117	CSF1R;NOTCH1;PIK3CD;SEMA3F;CYR61;EGFR;CXCL16;IGF1R;SDCBP;CCL7;GCNT2;CCL3;PDGFRB;SPAG9;SEMA4A;EDN1;TGFB1;F10;F2R;ACTN4;MMP9;TGFBR1;COL1A1;TIAM1;DAB2;MMP14;CXCL12;IL1B;MYADM;NUMB;MAPRE1;FERMT3	secretory granule lumen (GO:0034774)	39/318	0.000301543	0.0112074	1.78908	14.5034	APP;CSTB;MVP;CXCL1;GNS;ORM2;KNG1;C3;SDCBP;HK3;PSMD7;CYB5R3;GM2A;COTL1;TIMP1;B2M;S100A11;CTSC;SRGN;DYNC1H1;TGFB1;ANXA2;APAF1;STK11IP;ARG1;ACTN1;PGAM1;FN1;ACTN4;AMPD3;NFKB1;F5;GALNS;PFKL;LCN2;SERPING1;CHI3L1;S100A8;FERMT3			actin binding (GO:0003779)	29/255	0.00509549	0.488742	1.65902	8.7586	MACF1;HIP1;MEFV;ANTXR1;AIF1;CORO1A;EGFR;SAMD14;CFL1;COTL1;FLNB;SYNPO;CCR5;PHACTR4;TPM4;TPM3;NOS3;ACTN1;SHROOM3;MYO9B;ACTN4;MYO1E;FMNL1;FSCN1;MYH8;MYH9;FXYD5;LCP1;MYO1F
glycosaminoglycan catabolic process (GO:0006027)	16/57	8.59418e-07	0.000337354	4.09485	57.1928	HGSNAT;TGFB1;SDC3;BGN;PRELP;HSPG2;GNS;DCN;SLC9A1;GALNS;TMEM2;HYAL1;IDS;SDC1;AGRN;CD44	actin filament (GO:0005884)	12/56	0.000340425	0.0116792	3.12598	24.9619	TPM4;TPM3;PALLD;ACTN1;RAC2;MYO5A;MYO9B;LCP1;IQGAP1;CORO1A;AIF1;MARK2			kinase binding (GO:0019900)	43/419	0.00533133	0.472028	1.49709	7.83598	ERRFI1;CDKN1A;MIDN;USP37;BTG1;SHC1;MAPKAP1;MVP;WWC2;IQGAP1;PTPRK;PKD1;ACTB;RELA;ZFP36;SPRED1;CCND2;CCND1;RAC2;SLC12A7;PDGFRB;PPP1R12A;MAP3K1;FZD5;STK11IP;PGAM1;STAT3;AP1B1;RHOG;MSN;YWHAZ;TPCN2;SKI;CYLD;TIAM1;PFKL;DBF4;DLG3;TNIP2;CDC37;MAPRE1;LLGL1;MAP3K12
positive regulation of transcription, DNA-templated (GO:0045893)	118/1121	1.67721e-06	0.000611342	1.53557	20.4206	APP;CCNT2;CRTC3;CCNT1;ETS2;ELK3;RPS6KA4;TRIM28;ZMIZ1;SOX18;CREB3L2;RPS6KA1;EPC1;EP300;JUNB;SOX4;DDX17;SMARCC1;SUPT16H;RPL23;SLC11A1;F2R;SOX11;EBF3;PIAS1;TBL1XR1;BLM;NOTCH1;SHC1;NOTCH4;PIK3R1;FOXO1;SLC9A1;DVL2;HIVEP3;FADD;RREB1;BCL9L;CREBBP;ZFHX3;BRPF1;TGFB1;POU2F1;FZD5;HMGA1;NR2F2;INHBA;INO80;SMAD5;NFKB1;SMARCA4;FOSL2;NFATC4;COL1A1;DAB2;ID2;TCF4;HOXD4;OGT;CIITA;ELL;TGFB1I1;LDB2;BRCA2;PKD2;LITAF;M…	tertiary granule membrane (GO:0070821)	14/74	0.0004427	0.0141032	2.75987	21.3134	HGSNAT;CD93;SLC11A1;ATP6AP2;KCNAB2;FPR2;GPR84;CLEC4D;CLEC5A;SIRPA;ADAM8;CD47;CD33;CD177			7SK snRNA binding (GO:0097322)	3/6	0.00549274	0.451581	7.29395	37.9601	CCNT2;CCNT1;DDX21
positive regulation of nucleic acid-templated transcription (GO:1903508)	62/503	5.02354e-06	0.00170901	1.79811	21.9394	CIITA;TGFB1I1;BRCA2;GLI3;ETS2;GLI2;MED12;TRIM28;SOX18;CREB3L2;EPC1;EP300;SOX4;DDX17;SMARCC1;DTX3L;F2R;RHOG;SOX11;EBF3;ARID1A;TGFBR1;PIAS1;TBL1XR1;IL1B;IRF1;CREB5;BLM;NOTCH1;SHC1;NOTCH4;CXXC1;EGFR;FOXO1;RELA;FAM129B;CAMKK2;SPP1;DVL2;HIVEP3;RREB1;ATF7IP;CD74;CREBBP;ZFHX3;BRPF1;TGFB1;STAT3;HMGA1;NR2F2;INHBA;KLF4;HNRNPAB;SMAD5;NFKB1;SMARCA4;COL1A1;DAB2;KLF6;RYBP;ID2;TCF4	membrane raft (GO:0045121)	19/120	0.000513331	0.015263	2.30975	17.4954	APP;ANXA2;AHNAK;FURIN;TNFRSF1B;SULF1;TGFBR1;EGFR;SLC9A1;TNFRSF1A;TGFBR2;SDCBP;CLN3;GJA1;PLSCR1;MYADM;CD14;TLR6;TLR2			neurotrophin TRKA receptor binding (GO:0005168)	3/6	0.00549274	0.421476	7.29395	37.9601	SHC1;PIK3R1;EFNA5
regulated exocytosis (GO:0045055)	26/149	9.22516e-06	0.00294225	2.54554	29.5119	APP;CD63;TMED10;STXBP1;STXBP2;PLEK;ENDOD1;ORM2;KNG1;LAMP2;PSAP;TIMP1;RAB11FIP5;SRGN;TGFB1;ACTN1;FN1;ACTN4;LHFPL2;F5;RAB11B;SELP;DNAJC5;SERPING1;TAGLN2;FERMT3	actin cytoskeleton (GO:0015629)	35/295	0.0010868	0.0302944	1.73077	11.8117	CLIC4;AHNAK;DCTN4;SLC2A1;IQGAP1;AIF1;CORO1A;ACTB;SLC9A3R1;SAMD14;LASP1;RAC2;FLNB;SYNPO;WASF2;MARK2;PDLIM7;PPP1R12A;TPM4;TPM3;ACTN1;MYO5A;SHROOM3;MYO9B;ACTN4;CDC42BPB;CTTNBP2NL;MYO1E;PALLD;MYADM;FSCN1;MYH9;TAX1BP3;LCP1;LLGL1			phosphatidylinositol-3,4-bisphosphate binding (GO:0043325)	6/25	0.00586732	0.422081	3.50109	17.9899	HIP1;ADAP2;PLEKHA1;MAPKAP1;PLEK;MYO1G
granulocyte chemotaxis (GO:0071621)	14/57	2.2306e-05	0.00669574	3.58299	38.3762	PIK3CD;CX3CL1;PIK3CG;LGALS3;CCL7;CCL4;PDE4B;CCL3;SAA1;CCL2;NCKAP1L;PIP5K1C;SCG2;S100A8	clathrin-coated vesicle (GO:0030136)	16/101	0.00136792	0.0358879	2.31095	15.2395	TMED10;HIP1;CLTA;ECE1;FURIN;AP2B1;SCAMP1;IGF2R;EGFR;MYO1E;DAB2;SNX18;DVL2;NUMB;IL7R;RAB8B			transcription factor activity, RNA polymerase II core promoter proximal region sequence-specific binding (GO:0000982)	31/281	0.00603898	0.408875	1.60934	8.22296	NFAT5;CEBPB;TSHZ3;TSHZ1;ENO1;BACH1;LITAF;GLI3;RELA;ETS2;ELK3;SOX18;PLAGL2;SKIL;SOX4;CREBBP;ZFHX3;STAT3;EBF3;SOX11;KLF4;FOSL2;KLF7;PLSCR1;KLF6;SP2;NFIB;IRF1;TCF4;SSBP3;JDP2
positive regulation of transcription from RNA polymerase II promoter (GO:0045944)	90/849	2.26844e-05	0.00643104	1.54642	16.5372	APP;CIITA;CCNT2;CRTC3;CCNT1;ELL;PLXND1;LDB2;PKD2;LITAF;MYSM1;PKD1;GLI3;CYR61;ELK3;GLI2;MED12;RPS6KA4;NIPBL;ZMIZ1;SOX18;RPS6KA1;EPC1;EP300;JUNB;SOX4;DDX17;IL11;SUPT16H;EDN1;PPP1R12A;RPL23;SLC11A1;SOX11;EBF3;PPRC1;DCN;TNFRSF1A;PLSCR1;ZEB2;KAT2A;TBL1XR1;IRF1;ARHGEF2;TLR4;ENG;TLR2;NFAT5;CEBPB;NOTCH1;UHRF1;NOTCH4;PIK3R1;SUPT6H;EGFR;FOXO1;RELA;SLC9A1;E2F2;FADD;RREB1;BCL9L;BRD4;CREBBP;TGFB1;POU2F1;FZD5;…	specific granule membrane (GO:0035579)	15/92	0.00141732	0.0351181	2.37846	15.6003	HGSNAT;CD93;PLAUR;KCNAB2;FPR2;GPR84;SCAMP1;TNFRSF1B;CLEC4D;DNAJC5;CLEC5A;ADAM8;CD47;CD33;CD177			microfilament motor activity (GO:0000146)	5/18	0.00606207	0.387636	4.05219	20.6893	MYO1E;MYH8;MYO5A;MYH9;MYO9B
positive regulation of macromolecule metabolic process (GO:0010604)	38/277	3.37645e-05	0.00906845	2.00123	20.6048	APP;CD63;DNMT1;GBA;PIK3CD;ECE1;ARRB2;PPM1F;UBR5;CCL3;EPHB2;TGFB1;ANXA2;DTX3L;RPL23;SLC11A1;STAT3;FN1;MSN;SCRIB;SOX11;INHBA;KLF4;TGFBR1;P2RX7;OLFM1;PLSCR1;HGS;TBC1D5;FUBP1;ID2;IL1B;TLR6;TLR4;MYD88;TLR2;HSPA1A;RBMS3	contractile actin filament bundle (GO:0097517)	9/41	0.0015422	0.036201	3.20222	20.7329	TPM4;DAAM1;TPM3;ACTN1;ZYX;FSCN1;MYH9;LCP1;SYNPO			chemokine receptor binding (GO:0042379)	9/50	0.00633928	0.384027	2.62582	13.2893	CXCL12;CCL7;CCL4;CCL3;CCL2;CXCL1;CXCL2;CX3CL1;CXCL16
neutrophil migration (GO:1990266)	14/59	3.3882e-05	0.008645	3.46153	35.6283	PIK3CD;CX3CL1;PIK3CG;LGALS3;CCL7;CCL4;PDE4B;CCL3;SAA1;CCL2;NCKAP1L;PIP5K1C;S100A8;CD177	stress fiber (GO:0001725)	9/41	0.0015422	0.034391	3.20222	20.7329	TPM4;DAAM1;TPM3;ACTN1;FSCN1;ZYX;MYH9;LCP1;SYNPO			transcriptional activator activity, RNA polymerase II transcription factor binding (GO:0001190)	9/51	0.00724051	0.416691	2.57433	12.6865	MED12;CREBBP;NOTCH1;TRIM28;ANKRD1;SOX11;KLF4;SOX4;SMARCA4
negative regulation of cellular process (GO:0048523)	62/535	3.41196e-05	0.00829106	1.69056	17.3885	APP;COL18A1;CDKN1A;IFITM1;TES;BTG1;PLXND1;TGFB1I1;ARHGAP1;CXCL1;ENO1;PTPRK;PKD2;WISP1;CYR61;CTGF;GJA1;HYAL1;ENPP1;SOX4;CD33;RBM5;PBRM1;ACTN1;F2R;SOX11;EMP3;IMPACT;ADAM15;HGS;IL1B;IRF1;RASA1;ALDH1A2;MYH9;TMBIM6;BLM;NOTCH1;NOTCH4;KNG1;FAM129B;SLC9A3R1;SERTAD2;LMNA;IGFBP7;SKIL;S100A11;SUZ12;TGFB1;NOS3;OSM;HMGA1;INHBA;KLF4;SMARCA4;SKI;DLG3;DLG5;PDCD4;PLXNB2;TGFBI;HSPA1A	actomyosin (GO:0042641)	10/49	0.00155421	0.0330084	2.97712	19.2524	TPM4;DAAM1;TPM3;ACTN1;FSCN1;ZYX;MYH9;LCP1;CDC42BPB;SYNPO			protein phosphorylated amino acid binding (GO:0045309)	7/35	0.00863225	0.47313	2.91758	13.8651	SHC1;RASA1;PLCG2;PIK3R1;SAMSN1;VAV1;VAV2
lymphocyte chemotaxis (GO:0048247)	12/45	3.53485e-05	0.00819925	3.8901	39.8746	CH25H;CCL7;CCL4;CCL3;SAA1;PIK3CD;CCL2;ADAM8;CYP7B1;CX3CL1;PIK3CG;CXCL16	platelet alpha granule lumen (GO:0031093)	12/68	0.00207637	0.0420937	2.57433	15.902	SRGN;APP;TGFB1;ACTN1;FN1;SERPING1;TIMP1;ACTN4;ORM2;KNG1;F5;FERMT3			AP-2 adaptor complex binding (GO:0035612)	3/7	0.00912447	0.477375	6.25195	29.3642	HIP1;TBC1D5;SIDT2
platelet degranulation (GO:0002576)	22/125	3.82696e-05	0.00849086	2.56747	26.1134	SRGN;APP;CD63;TGFB1;ACTN1;STXBP1;STXBP2;PLEK;ENDOD1;FN1;ACTN4;LHFPL2;ORM2;KNG1;F5;SELP;LAMP2;PSAP;SERPING1;TAGLN2;TIMP1;FERMT3	BAF-type complex (GO:0090544)	5/17	0.00463641	0.089906	4.29056	23.0567	SMARCC1;PBRM1;ARID1A;ARID1B;SMARCA4			low-density lipoprotein receptor activity (GO:0005041)	4/13	0.0095264	0.476734	4.48858	20.8885	SORL1;LRP8;LRP12;CXCL16
cellular response to molecule of bacterial origin (GO:0071219)	17/85	5.4526e-05	0.0115936	2.91758	28.6414	UPF1;CD274;FZD5;TNFRSF1B;RELA;NFKB1;ZFP36;TNIP2;PDE4B;ANKRD1;PDCD4;CCL2;CD14;CCR5;FCGR2B;TLR4;TLR2	platelet dense granule membrane (GO:0031088)	3/6	0.00549274	0.102073	7.29395	37.9601	SELP;CD63;LAMP2			core promoter proximal region sequence-specific DNA binding (GO:0000987)	30/279	0.00968918	0.464677	1.56859	7.27316	NFAT5;UHRF1;CHD4;LITAF;ACTB;GLI3;RELA;ETS2;ELK3;SOX18;JUNB;SKIL;SMARCC1;CREBBP;ZFHX3;STAT3;RFX2;RFX1;KLF4;SMARCA4;FOSL2;NFATC4;KLF7;KLF6;SP2;NFIB;IRF1;TCF4;SSBP3;JDP2
neutrophil chemotaxis (GO:0030593)	13/54	5.46134e-05	0.0111477	3.5119	34.4701	PIK3CD;CX3CL1;PIK3CG;LGALS3;CCL7;CCL4;PDE4B;CCL3;SAA1;CCL2;NCKAP1L;PIP5K1C;S100A8	trans-Golgi network membrane (GO:0032588)	13/86	0.0055923	0.0997667	2.20515	11.4367	USP6NL;APP;CD74;COG8;COG3;AP1B1;CLTA;PLD4;IGF2R;SCAMP2;RAB43;VPS53;LLGL1			type II transforming growth factor beta receptor binding (GO:0005114)	3/8	0.013861	0.63816	5.47046	23.4063	TGFB1;TGFBR1;ENG
macrophage activation (GO:0042116)	7/17	7.38952e-05	0.0145034	6.00678	57.1417	CRTC3;CD93;SLC11A1;FPR2;AIF1;TLR4;FOXP1	endoplasmic reticulum lumen (GO:0005788)	30/271	0.00651155	0.111698	1.6149	8.12967	APP;COL18A1;COL15A1;COL12A1;TNC;LAMC1;KNG1;CYR61;C3;GANAB;OS9;SPP1;IGFBP7;TIMP1;B2M;CTSC;CRTAP;F10;IGFBP5;IGFBP4;COL23A1;FN1;PLAUR;CP;F5;COL1A1;COL4A2;COL4A1;NUCB1;SCG2			neurotrophin TRK receptor binding (GO:0005167)	3/8	0.013861	0.613616	5.47046	23.4063	SHC1;PIK3R1;EFNA5
endoderm formation (GO:0001706)	10/37	0.000139656	0.026395	3.94267	34.9965	SETD2;MMP14;COL4A2;DUSP1;MMP2;COL12A1;FN1;INHBA;ITGA5;MMP9	endocytic vesicle (GO:0030139)	15/109	0.00742132	0.122589	2.00751	9.84361	RAB5B;GOLIM4;PLD4;CLTA;ARRB2;AP2B1;CORO1A;IGF2R;RAB11B;RAB43;MYO1E;FMNL1;DVL2;SAA1;RAB8B			type I transforming growth factor beta receptor binding (GO:0034713)	3/8	0.013861	0.590889	5.47046	23.4063	TGFB1;ENG;TGFBR2
positive regulation of cell activation (GO:0050867)	5/9	0.000149926	0.0273241	8.10438	71.3621	SELP;APP;RPS6KA1;PLEK;TLR4	Golgi membrane (GO:0000139)	44/443	0.00859108	0.136844	1.44891	6.89251	USP6NL;ARF3;APP;B4GALT3;NOTCH1;TMED10;CHPF;NOTCH4;GCNT1;GOLIM4;SLC2A1;CLTA;PLD4;FURIN;PKD1;GLG1;GALNT10;NDST2;RAB43;GOLGA3;UGCG;CLN3;GJA1;CYTH4;MAN1A2;VPS53;B4GALNT1;NCAM1;B2M;CSGALNACT1;RHBDF1;CD74;COG8;LMAN1L;NOS3;SLC35C1;COG3;AP1B1;SORL1;IGF2R;SCAMP2;TNFRSF1A;EXT1;LLGL1			lipoprotein particle receptor activity (GO:0030228)	4/15	0.0162966	0.669905	3.8901	16.0148	SORL1;LRP8;LRP12;CXCL16
response to lipopolysaccharide (GO:0032496)	24/156	0.000159372	0.028044	2.24429	19.6247	CD274;UPF1;NOS3;SLC11A1;F2R;CXCL1;IRAK3;TNFRSF1B;CXCL2;NFKB1;FOXP1;TNFRSF1A;SELP;ZFP36;SRR;TNIP2;PDE4B;ANKRD1;PDCD4;CCL2;CD14;CCR5;JUNB;TLR4	clathrin coat of endocytic vesicle (GO:0030128)	4/13	0.0095264	0.146509	4.48858	20.8885	HIP1;TBC1D5;AP2B1;EGFR			RNA polymerase II transcription coactivator activity (GO:0001105)	7/40	0.017785	0.705881	2.55288	10.2866	MED12;CREBBP;TRIM28;ANKRD1;SOX11;SOX4;SMARCA4
skeletal system development (GO:0001501)	23/147	0.000167513	0.028494	2.28246	19.8447	IGFBP4;IFT140;ANKRD11;COL12A1;CHD7;SOX11;PRELP;SULF1;PKD1;ETS2;TGFBR1;GLI2;PAPSS1;COL1A1;EXT1;ADAMTS4;HYAL1;TRPS1;CREB3L2;SH3PXD2B;CHI3L1;SOX4;CD44	AP-2 adaptor complex (GO:0030122)	4/13	0.0095264	0.141626	4.48858	20.8885	HIP1;TBC1D5;AP2B1;EGFR			disordered domain specific binding (GO:0097718)	5/23	0.0179077	0.68706	3.17128	12.7566	NUMA1;FN1;MDM2;HSPA2;HSPA1A
regulation of heterotypic cell-cell adhesion (GO:0034114)	7/19	0.000169511	0.0279037	5.37449	46.6645	IL1RN;IL1B;GCNT2;MYADM;MBP;KLF4;CD44	azurophil granule (GO:0042582)	19/155	0.00983207	0.141455	1.78819	8.26522	CD63;DYNC1H1;ANXA2;STK11IP;ARG1;STXBP2;PRCP;GNS;ORM2;C3;GALNS;SDCBP;NCSTN;CYB5R3;GM2A;DNAJC5;LAMP2;PSAP;CTSC			Toll-like receptor binding (GO:0035325)	3/9	0.0197442	0.733084	4.86263	19.0853	TLR6;S100A8;TLR2
endodermal cell differentiation (GO:0035987)	9/33	0.00027879	0.0444584	3.97852	32.5644	SETD2;MMP14;COL4A2;MMP2;COL12A1;FN1;INHBA;ITGA5;MMP9	phagocytic vesicle (GO:0045335)	12/84	0.0118031	0.164505	2.08398	9.25163	RAB43;FMNL1;SLC11A1;NCF4;RAC2;PLD4;ADAM8;TCIRG1;B2M;CORO1A;RAB8B;RAB11B			Rho guanyl-nucleotide exchange factor activity (GO:0005089)	9/60	0.0203351	0.731428	2.18818	8.52387	GNA13;TIAM1;TRIO;PLEKHG2;SPATA13;ARHGEF1;ARHGEF2;VAV1;VAV2
vasculogenesis (GO:0001570)	9/33	0.00027879	0.0431111	3.97852	32.5644	PDGFRB;SPRED1;NOTCH1;TGFB1;SOX18;RASA1;AGGF1;TGFBR2;ENG	lamellipodium membrane (GO:0031258)	3/8	0.013861	0.187333	5.47046	23.4063	SLC39A6;ANTXR1;CD44			sulfuric ester hydrolase activity (GO:0008484)	4/16	0.0205733	0.717573	3.64697	14.164	GALNS;IDS;SULF1;GNS
inflammatory response (GO:0006954)	33/253	0.000280827	0.0421489	1.90277	15.5604	CSF1R;CEBPB;PIK3CD;CXCL1;FPR2;MEFV;AIF1;CXCL2;CX3CL1;RELA;PIK3CG;CCL7;HYAL1;CCL4;CCL3;CCL2;TGFB1;IL10RB;SLC11A1;STAT3;F2R;TNFRSF1B;HSPG2;NFKB1;NFATC4;TNFRSF1A;IL1B;CHI3L1;ADAM8;FCGR2B;TLR4;SCG2;S100A8	SWI/SNF complex (GO:0016514)	4/15	0.0162966	0.213772	3.8901	16.0148	SMARCC1;ARID1A;ARID1B;SMARCA4			cytokine activity (GO:0005125)	18/156	0.0207988	0.704102	1.68322	6.51887	IL11;IL1RN;EDN1;TGFB1;OSM;CXCL1;INHBA;CXCL2;CX3CL1;CXCL16;CXCL12;CCL7;IL1B;CCL4;CCL3;CCL2;TIMP1;SCG2
negative regulation of protein autophosphorylation (GO:0031953)	5/10	0.0002829	0.0412468	7.29395	59.5946	ERRFI1;IMPACT;MVP;ENPP1;ENG	trans-Golgi network transport vesicle (GO:0030140)	4/15	0.0162966	0.207665	3.8901	16.0148	TMED10;FURIN;IGF2R;RAB8B			protein kinase binding (GO:0019901)	46/496	0.0227535	0.748265	1.35291	5.11811	CSF1R;ERRFI1;CDKN1A;USP37;SHC1;MAPKAP1;MVP;PLEK;ADCY4;IQGAP1;PTPRK;PKD1;EGFR;ACTB;RELA;IGF1R;ZFP36;SPRED1;CCND2;CCND1;RAC2;EPHB2;SLC12A7;SPAG9;PDGFRB;PPP1R12A;MAP3K1;FZD5;PRKCB;STK11IP;PGAM1;STAT3;AP1B1;RHOG;MSN;YWHAZ;TPCN2;SKI;CYLD;DBF4;PRKAR1A;TNIP2;MAPRE1;MAP3K11;LLGL1;MAP3K12
positive regulation of calcium ion import (GO:0090280)	5/10	0.0002829	0.0401011	7.29395	59.5946	PDGFRB;LGALS3;CXCL12;CCL3;CCL2	trans-Golgi network (GO:0005802)	21/186	0.0166774	0.206614	1.64702	6.74241	USP6NL;PI4K2B;APP;CD74;COG8;NCF4;COG3;GCNT1;AP1B1;PLD4;CLTA;FURIN;SCAMP1;SORL1;IGF2R;SCAMP2;RAB43;CLN3;VPS53;TGFBI;LLGL1			histone-lysine N-methyltransferase activity (GO:0018024)	7/42	0.022868	0.731142	2.43132	9.18555	SUZ12;SETD2;SETD1B;SETD1A;SETDB2;CXXC1;ASH1L
response to acidic pH (GO:0010447)	5/10	0.0002829	0.0390173	7.29395	59.5946	IMPACT;CTSS;SLC9A1;RAB11FIP5;RAB11B	Golgi lumen (GO:0005796)	13/99	0.0175628	0.211703	1.91558	7.74273	APP;TGFB1;F10;SDC3;GOLIM4;BGN;FURIN;PRELP;HSPG2;DCN;MMP14;SDC1;AGRN			RNA polymerase II core promoter proximal region sequence-specific DNA binding (GO:0000978)	27/263	0.0234216	0.728601	1.49762	5.6222	NFAT5;CHD4;LITAF;ACTB;GLI3;RELA;ETS2;ELK3;SOX18;JUNB;SKIL;SMARCC1;ZFHX3;STAT3;RFX2;RFX1;SMARCA4;FOSL2;NFATC4;KLF7;KLF6;SP2;NFIB;IRF1;TCF4;SSBP3;JDP2
positive regulation of receptor binding (GO:1900122)	4/6	0.00029481	0.0395899	9.72526	79.0584	NRP1;ANXA2;B2M;MMP9	pseudopodium (GO:0031143)	3/9	0.0197442	0.231735	4.86263	19.0853	ACTN1;MSN;ACTN4			phosphatase binding (GO:0019902)	13/103	0.0236709	0.716979	1.84119	6.89251	PPP1R12A;ELL;MVP;STAT3;PIK3R1;IQGAP1;EGFR;SLC9A3R1;SPRED1;DLG3;TRAF3;KCNN4;CTSC
positive regulation of BMP signaling pathway (GO:0030513)	7/21	0.000346437	0.04533	4.86263	38.7445	NOTCH1;NUMA1;UBE2O;SOX11;SULF1;CYR61;ENG	azurophil granule lumen (GO:0035578)	12/91	0.0213174	0.243784	1.92368	7.40276	C3;GALNS;SDCBP;DYNC1H1;CYB5R3;GM2A;ANXA2;ARG1;STK11IP;ORM2;GNS;CTSC			protein phosphatase binding (GO:0019903)	12/93	0.0248634	0.73379	1.88231	6.95392	TRAF3;MVP;STAT3;IQGAP1;PIK3R1;SMG7;KCNN4;EGFR;FOXO1;PHACTR4;CTTNBP2NL;SLC9A1
protein-DNA complex disassembly (GO:0032986)	7/21	0.000346437	0.0441967	4.86263	38.7445	SMARCC1;SUPT16H;PBRM1;RPL23;HMGA1;ARID1A;SMARCA4	chromatin (GO:0000785)	30/297	0.0215543	0.24033	1.47352	5.65418	AHCTF1;ELL;MAGED1;PPP1R10;UHRF1;CHD4;SUPT6H;ACTB;RELA;NIPBL;CHAF1B;CCND2;SOX18;H2AFJ;TRPS1;TNRC18;JUNB;BAHCC1;UPF1;SMARCC1;CREBBP;HIST1H2AH;SETD1A;STAT3;ARID1A;KLF4;SMARCA4;ZEB2;IRF1;TCF4			metalloaminopeptidase activity (GO:0070006)	4/17	0.025477	0.733102	3.43245	12.597	MMP14;XPNPEP1;ANPEP;RNPEP
positive regulation of cell differentiation (GO:0045597)	27/195	0.000377915	0.0470366	2.01986	15.9182	IFITM1;CEBPB;NOTCH1;TGFB1I1;CYR61;CTGF;ZFP36L1;SDCBP;ZFP36;RPS6KA1;GCNT2;CTNNA1;JUNB;SOX5;BCL9L;SPAG9;TGFB1;ATP6AP1;SOX11;NFKB1;TGFBR1;TGFBR2;COL1A1;TIAM1;OLFM1;DAB2;IL1B	nuclear transcription factor complex (GO:0044798)	10/72	0.0245215	0.266746	2.0261	7.51318	NFAT5;POU2F1;TRIM28;SNAPC4;STAT3;HMGA1;E2F2;HNRNPAB;PBX1;NFATC4			endocytic adaptor activity (GO:0098748)	3/10	0.0267908	0.752102	4.37637	15.8411	DAB2;HIP1;AP2B1
cellular response to mechanical stimulus (GO:0071260)	11/49	0.000390008	0.0473859	3.27483	25.7053	MAP3K1;TNFSF14;IL1B;IRF1;ANKRD1;FADD;TLR4;NFKB1;MYD88;TNFRSF1A;SLC9A1	endosome lumen (GO:0031904)	5/25	0.0252529	0.268162	2.91758	10.7332	APP;CD63;B2M;CTSS;LGMN			clathrin adaptor activity (GO:0035615)	3/10	0.0267908	0.734195	4.37637	15.8411	DAB2;HIP1;AP2B1
positive regulation of intracellular signal transduction (GO:1902533)	53/480	0.000409358	0.0485803	1.61075	12.5653	APP;HIP1;PIK3CD;LITAF;PIK3CG;IGF1R;TRIM8;GJA1;EPHB2;PDGFRB;IL11;PRKCB;RPL23;F2R;GAB1;SOX11;ACTN4;TNFRSF1B;VAV1;TGFBR1;DCN;TNFRSF1A;CHI3L1;ADAM8;TLR6;S100A8;ENG;CSF1R;SHC1;PIK3R1;EGFR;RELA;SLC9A3R1;BCL2L11;CCL4;GCNT2;CCL3;CD14;FADD;BRD4;MAP3K3;CD74;TGFB1;F10;OSM;PUM1;SELP;TNIP2;DLG5;PDCD4;PIK3AP1;IL7R;MYD88	clathrin adaptor complex (GO:0030131)	4/17	0.025477	0.26425	3.43245	12.597	HIP1;TBC1D5;AP2B1;EGFR			diacylglycerol kinase activity (GO:0004143)	3/10	0.0267908	0.717121	4.37637	15.8411	DGKD;DGKK;DGKZ
cellular response to peptide (GO:1901653)	10/42	0.000431021	0.0499887	3.47331	26.9159	APP;RPL23;MDM2;FPR2;ARHGEF2;TLR6;FCGR2B;TLR4;ZFP36L1;IGF1R	beta-catenin-TCF complex (GO:1990907)	3/11	0.0349962	0.354734	3.97852	13.338	BCL9;TCF4;BCL9L			helicase activity (GO:0004386)	6/35	0.0300478	0.786024	2.50078	8.76515	DDX17;EIF4A1;UPF1;BLM;EIF4H;INO80
T cell migration (GO:0072678)	6/16	0.000451663	0.0512186	5.47046	42.1366	CCL3;MSN;PIK3CD;PIK3CG;CXCL16;MYO1G	npBAF complex (GO:0071564)	3/11	0.0349962	0.346851	3.97852	13.338	SMARCC1;ARID1A;SMARCA4			enhancer sequence-specific DNA binding (GO:0001158)	9/65	0.0325031	0.831358	2.01986	6.92089	SMARCC1;HMGA1;CHD4;SOX11;BACH1;ACTB;RELA;NFKB1;SMARCA4
neural tube development (GO:0021915)	6/16	0.000451663	0.0501052	5.47046	42.1366	TGFB1;ALDH1A2;SOX11;PKD2;PKD1;SOX4	nuclear chromatin (GO:0000790)	25/254	0.0436406	0.423124	1.43582	4.49664	UHRF2;UHRF1;CHD4;ACTB;RELA;CHAF1B;NIPBL;SOX18;H2AFJ;TRPS1;EP400;JUNB;CENPT;SMARCC1;CREBBP;HIST1H2AH;SETD1A;STAT3;INO80;ARID1A;KLF4;SMARCA4;ZEB2;IRF1;TCF4			transcriptional activator activity, RNA polymerase II core promoter proximal region sequence-specific binding (GO:0001077)	19/176	0.0330651	0.827347	1.57483	5.36903	NFAT5;STAT3;EBF3;SOX11;KLF4;LITAF;GLI3;RELA;ELK3;KLF7;PLSCR1;KLF6;SOX18;NFIB;IRF1;PLAGL2;TCF4;SSBP3;SOX4
circulatory system development (GO:0072359)	18/110	0.000475397	0.051616	2.38711	18.2646	NOTCH1;TGFB1;ECE1;PKD2;HSPG2;PKD1;TGFBR1;GLI2;TGFBR2;CDH5;GJA1;NIPBL;KAT2A;ADAP2;FLRT3;SH3PXD2B;DVL2;SOX4	ficolin-1-rich granule lumen (GO:1904813)	14/124	0.0447022	0.424195	1.64702	5.1185	CSTB;APAF1;PGAM1;MVP;AMPD3;GNS;MMP9;CTSS;HK3;PFKL;PSMD7;COTL1;PLEKHO2;HSPA1A			Rab GTPase binding (GO:0017137)	15/131	0.0347769	0.851664	1.67037	5.61044	USP6NL;TBC1D9B;ATP6AP1;ARHGAP1;MYO5A;TBC1D9;BICD2;TBC1D1;TBC1D2;RUSC2;TBC1D5;ANKFY1;RIN3;LLGL1;RAB11FIP5
cellular response to lipopolysaccharide (GO:0071222)	16/92	0.000481729	0.0512138	2.53702	19.3781	UPF1;CD274;TGFB1;TNFRSF1B;NFKB1;ZFP36;TNIP2;IL1B;PDE4B;ANKRD1;CCL3;PDCD4;CCL2;CD14;CCR5;TLR4	lytic vacuole (GO:0000323)	19/184	0.0484308	0.450003	1.50636	4.56068	NAPSA;DTX3L;SLC11A1;GBA;LAPTM5;MYO5A;CTSS;TPCN2;TPCN1;CLN3;NPC1;HGS;HYAL1;LAMP2;PSAP;ACP2;CTSC;SIDT2;LGMN			semaphorin receptor activity (GO:0017154)	3/11	0.0349962	0.839179	3.97852	13.338	NRP1;PLXND1;PLXNB2
response to sterol (GO:0036314)	5/11	0.00048938	0.0509654	6.63086	50.5429	TGFB1;CCL3;CCR5;TGFBR1;TGFBR2	endolysosome (GO:0036019)	4/21	0.051604	0.469702	2.77865	8.23634	CLTA;AP2B1;CTSS;LGMN			platelet-derived growth factor binding (GO:0048407)	3/11	0.0349962	0.822053	3.97852	13.338	COL1A1;PDGFRB;COL4A1
spinal cord development (GO:0021510)	5/11	0.00048938	0.0499461	6.63086	50.5429	SOX11;PKD2;PKD1;SOX4;GLI2	polymeric cytoskeletal fiber (GO:0099513)	22/222	0.0523497	0.466959	1.44565	4.26438	MACF1;DYNC1H1;TPM4;TPM3;ACTN1;TBCD;MYO5A;MYO9B;SLC1A4;IQGAP1;KCNAB2;AIF1;CORO1A;PALLD;DPYSL2;RAC2;ARHGEF2;LCP1;VIM;MAPRE1;MARK2;MAP3K11			mRNA 3'-UTR AU-rich region binding (GO:0035925)	3/11	0.0349962	0.805612	3.97852	13.338	ZFP36;ZFP36L1;RBMS3
positive regulation of phosphorylation (GO:0042327)	28/209	0.000511244	0.0511545	1.95436	14.8114	APP;NRP1;CSF1R;FPR2;EFNA5;STK4;EGFR;CYR61;CAMKK2;IGF1R;C3;SDCBP;CCND2;CCND1;DVL2;NCKAP1L;EPHB2;PDGFRB;CD74;TGFB1;LMO4;PLAUR;MMP9;P2RX7;DAB2;IL1B;CARD14;ENG	secondary lysosome (GO:0005767)	3/13	0.0547824	0.479077	3.36644	9.77743	NCF4;LAMP2;ADAM8			RNA polymerase binding (GO:0070063)	4/19	0.0372254	0.840125	3.07114	10.1064	ZFP36;CCNT2;CCNT1;PHRF1
response to cytokine (GO:0034097)	21/139	0.000511596	0.0502053	2.20393	16.7013	IFITM3;CSF1R;CD274;IFITM1;CIITA;SETD2;IFITM2;SLC11A1;STAT3;ADAR;IRAK3;MEFV;OSMR;RELA;CXCL16;PLSCR1;ALDH1A2;CHI3L1;TIMP1;JUNB;MYD88	Set1C/COMPASS complex (GO:0048188)	3/13	0.0547824	0.469864	3.36644	9.77743	SETD1B;SETD1A;CXXC1			insulin receptor binding (GO:0005158)	4/19	0.0372254	0.823969	3.07114	10.1064	SHC1;ENPP1;PIK3R1;IGF1R
positive regulation of NIK/NF-kappaB signaling (GO:1901224)	9/36	0.000564803	0.0543809	3.64697	27.2758	APP;PDCD4;CHI3L1;CD14;ACTN4;TLR6;CARD14;RELA;EGFR	coated vesicle (GO:0030135)	9/72	0.0568565	0.478453	1.82349	5.22835	DAB2;SNX18;HIP1;TMED10;LMAN1L;NUMB;SCAMP1;CTSC;F5			phosphatidylinositol bisphosphate binding (GO:1902936)	11/88	0.0378096	0.821111	1.82349	5.97227	SDCBP;SNX18;HIP1;ADAP2;ANXA2;PLEKHA1;MAPKAP1;PLEK;SH3PXD2B;SLC9A1;MYO1G
regulation of natural killer cell chemotaxis (GO:2000501)	4/7	0.000650452	0.0614677	8.33594	61.1678	CCL7;CCL4;CCL3;CCL2	gamma-secretase complex (GO:0070765)	2/6	0.0585337	0.483445	4.86263	13.8009	NCSTN;TMED10			transcription coactivator activity (GO:0003713)	28/292	0.0454754	0.969301	1.39884	4.32323	CIITA;TGFB1I1;MYSM1;FAM129B;MED12;TRIM28;ANKRD1;EP300;JUNB;SOX4;BCL9L;DDX17;SMARCC1;CREBBP;PRKCB;FUS;ACTN1;HMGA1;SOX11;ACTN4;PPRC1;ARID1A;ARID1B;SMARCA4;NFATC4;PIAS1;KLF7;KAT2A
leukocyte aggregation (GO:0070486)	4/7	0.000650452	0.0603501	8.33594	61.1678	IL1B;RAC2;CD44;S100A8	integral component of cytoplasmic side of endoplasmic reticulum membrane (GO:0071458)	2/6	0.0585337	0.474655	4.86263	13.8009	PKD2;SPPL3			insulin-like growth factor I binding (GO:0031994)	3/13	0.0547824	1	3.36644	9.77743	IGFBP5;IGFBP4;IGF1R
positive chemotaxis (GO:0050918)	6/17	0.00065772	0.0599347	5.14867	37.7229	NRP1;LGALS3;SCRIB;FPR2;CORO1A;SCG2	cytoplasmic vesicle lumen (GO:0060205)	14/130	0.061898	0.492973	1.571	4.37095	CSTB;APAF1;PGAM1;MVP;AMPD3;NFKB1;C3;HK3;PFKL;PSMD7;COTL1;SAA1;S100A8;S100A11			organic acid:sodium symporter activity (GO:0005343)	3/13	0.0547824	1	3.36644	9.77743	SLC10A4;SLC6A6;SLC13A3
positive regulation of transcription of Notch receptor target (GO:0007221)	6/17	0.00065772	0.0588832	5.14867	37.7229	CREBBP;NOTCH1;PLXND1;NOTCH4;EP300;PBX1	cytoskeleton (GO:0005856)	45/521	0.0649329	0.508071	1.25999	3.44532	MACF1;CLIC4;HIP1;AHNAK;MVP;IQGAP1;SMG7;ACTB;SLC9A3R1;SDCBP;SAMD14;NDOR1;RAC2;FLNB;IGF2BP2;SYNPO;WASF2;PDLIM7;PPP1R12A;TPM4;TPM3;RHOG;MSN;SHROOM3;MYO9B;NAV1;INO80;CDC42BPB;ACTN4;CTTNBP2NL;EML4;MYO1E;MMP14;FRMD6;TTLL3;PALLD;AKAP9;FSCN1;MYH9;TAX1BP3;LCP1;ARHGEF2;VIM;S100A8;LLGL1			oxidoreductase activity, acting on NAD(P)H, heme protein as acceptor (GO:0016653)	3/13	0.0547824	1	3.36644	9.77743	CYB5R3;NDOR1;NOS3
positive regulation of lymphocyte migration (GO:2000403)	6/17	0.00065772	0.057868	5.14867	37.7229	APP;CXCL12;CCL7;CCL4;CCL3;AIF1	cortical actin cytoskeleton (GO:0030864)	7/53	0.0686747	0.528085	1.9267	5.16043	LASP1;HIP1;SLC2A1;MYADM;SHROOM3;CORO1A;LLGL1			transcriptional activator activity, RNA polymerase II transcription regulatory region sequence-specific binding (GO:0001228)	27/285	0.0550903	1	1.38201	4.00615	NFAT5;LITAF;GLI3;RELA;ELK3;SOX18;TRPS1;CREB3L2;PLAGL2;E2F2;RREB1;SOX4;STAT3;HMGA1;EBF3;SOX11;KLF4;NFKB1;FOSL2;KLF7;PLSCR1;KLF6;NFIB;IRF1;HOXD4;TCF4;SSBP3
response to interleukin-1 (GO:0070555)	14/77	0.000672887	0.058199	2.65234	19.3725	UPF1;IRAK3;ADAMTS12;CX3CL1;RELA;NFKB1;CCL7;HYAL1;CCL4;ANKRD1;CCL3;CHI3L1;CCL2;MYD88	cortical cytoskeleton (GO:0030863)	7/53	0.0686747	0.519134	1.9267	5.16043	LASP1;SLC2A1;MYADM;SHROOM3;MAPRE1;CORO1A;LLGL1			phosphatidylinositol bisphosphate kinase activity (GO:0052813)	9/72	0.0568565	1	1.82349	5.22835	PDGFRB;GAB1;PIK3CD;PIK3R1;PIP5K1C;PIK3AP1;PIK3CG;VAV1;EGFR
MyD88-dependent toll-like receptor signaling pathway (GO:0002755)	8/30	0.000716381	0.0609282	3.8901	28.1694	MAP3K1;IRAK3;REG3G;CD14;TLR6;TLR4;MYD88;TLR2	microvillus (GO:0005902)	6/43	0.0713918	0.530679	2.03552	5.3729	SLC9A3R1;CLIC4;TGFB1;FSCN1;MSN;CD44			chromo shadow domain binding (GO:0070087)	2/6	0.0585337	1	4.86263	13.8009	NIPBL;TRIM28
regulation of epithelial to mesenchymal transition (GO:0010717)	13/69	0.000729834	0.0610548	2.74844	19.8512	NOTCH1;TGFB1;TGFB1I1;TGFBR1;TGFBR2;COL1A1;OLFM1;TIAM1;SDCBP;DAB2;IL1B;GCNT2;BCL9L	ruffle membrane (GO:0032587)	7/54	0.0744649	0.544448	1.89102	4.9118	MACF1;PLEKHA1;PLEK;SPATA13;ITGA5;ARHGEF2;AIF1			histone methyltransferase activity (H3-K36 specific) (GO:0046975)	2/6	0.0585337	1	4.86263	13.8009	SETD2;ASH1L
response to interferon-gamma (GO:0034341)	13/69	0.000729834	0.0600701	2.74844	19.8512	IFITM3;IFITM1;CIITA;IFITM2;SLC11A1;MEFV;AIF1;CX3CL1;CXCL16;CCL7;CCL4;CCL3;CCL2	Golgi subcompartment (GO:0098791)	41/480	0.0855235	0.615217	1.24605	3.06399	ARF3;PI4K2B;B4GALT3;NOTCH1;TMED10;CHPF;NOTCH4;GCNT1;NCF4;GOLIM4;SLC2A1;FURIN;PKD1;GLG1;GALNT10;NDST2;GOLGA3;UGCG;CLN3;GJA1;CYTH4;MAN1A2;B4GALNT1;NCAM1;B2M;CSGALNACT1;RHBDF1;CD74;COG8;LMAN1L;NOS3;SLC35C1;COG3;AP1B1;SCAMP1;SORL1;IGF2R;TNFRSF1A;EXT1;AKAP9;TGFBI			hyalurononglucosaminidase activity (GO:0004415)	2/6	0.0585337	1	4.86263	13.8009	TMEM2;HYAL1
toll-like receptor signaling pathway (GO:0002224)	15/87	0.000784849	0.0635728	2.51515	17.9834	MAP3K1;IRAK3;REG3G;CTSS;TRAF3;TNIP2;TLR6;FADD;CD14;PIK3AP1;TLR4;S100A8;MYD88;TLR2;LGMN	serine/threonine protein kinase complex (GO:1902554)	4/26	0.0987281	0.698932	2.24429	5.1964	DAB2;TGFBR1;TGFBR2;ENG			NADPH-hemoprotein reductase activity (GO:0003958)	2/6	0.0585337	1	4.86263	13.8009	NDOR1;NOS3
establishment of apical/basal cell polarity (GO:0035089)	5/12	0.000791675	0.0631237	6.07829	43.4072	SLC9A3R1;FSCN1;MSN;SCRIB;MYO9A	mitotic spindle pole (GO:0097431)	4/26	0.0987281	0.688012	2.24429	5.1964	MAPKBP1;NIN;NUMA1;SMC1A			solute:proton antiporter activity (GO:0015299)	2/6	0.0585337	1	4.86263	13.8009	SLC11A1;SLC9A1
positive regulation of protein modification process (GO:0031401)	23/164	0.000828683	0.065058	2.04586	14.5168	APP;CSF1R;CD74;TGFB1;GBA;PLAUR;FPR2;EFNA5;STK4;SPPL3;MMP9;CYR61;EGFR;CAMKK2;C3;DAB2;CCND2;CCND1;IL1B;DVL2;ALG10B;CARD14;ENG	microtubule minus-end (GO:0036449)	2/8	0.0997763	0.684619	3.64697	8.40563	NIN;NUMA1			transforming growth factor beta-activated receptor activity (GO:0005024)	2/6	0.0585337	1	4.86263	13.8009	TGFBR1;TGFBR2
regulation of ERK1 and ERK2 cascade (GO:0070372)	31/248	0.000872797	0.0674831	1.82349	12.8443	APP;NRP1;CSF1R;NOTCH1;SHC1;FPR2;ARRB2;CX3CL1;EGFR;CYR61;ICAM1;CTGF;IGF1R;SLC9A3R1;CCL7;CCL4;GCNT2;CCL3;CCL2;EPHB2;PDGFRB;CD74;TGFB1;ATP6AP1;F2R;FN1;DUSP6;IL1B;CHI3L1;TLR4;CD44	chromatin silencing complex (GO:0005677)	2/8	0.0997763	0.674246	3.64697	8.40563	TNRC18;BAHCC1			CD4 receptor binding (GO:0042609)	2/6	0.0585337	1	4.86263	13.8009	CD74;PLSCR1
regulation of MAP kinase activity (GO:0043405)	15/88	0.000887264	0.0675777	2.48657	17.4741	PDGFRB;EDN1;TGFB1;DUSP1;GBA;IRAK3;SORL1;PIK3CG;EGFR;IGF1R;ROBO1;HGS;IL1B;ADAM8;EPHB2	cyclin/CDK positive transcription elongation factor complex (GO:0008024)	2/8	0.0997763	0.664182	3.64697	8.40563	CCNT2;CCNT1			glucosyltransferase activity (GO:0046527)	2/6	0.0585337	1	4.86263	13.8009	ALG8;PLOD3
glycosaminoglycan metabolic process (GO:0030203)	12/62	0.000900038	0.0675425	2.82346	19.8012	NDST2;EXT1;HGSNAT;SDC3;BGN;GCNT2;IDS;SDC1;AGRN;HSPG2;GNS;DCN	unconventional myosin complex (GO:0016461)	2/8	0.0997763	0.654415	3.64697	8.40563	MYO9A;MYO1F			1-phosphatidylinositol 4-kinase activity (GO:0004430)	2/6	0.0585337	0.990769	4.86263	13.8009	PI4K2B;PI4KA
cellular response to organic cyclic compound (GO:0071407)	20/136	0.000971991	0.0718851	2.14528	14.88	BLM;TGFB1;IGFBP5;MSN;ATP1A1;PKD2;ACTB;NFKB1;RELA;EGFR;ZFP36L1;IMPACT;GNG2;IL1B;AKAP9;GNB1;SPP1;CCL3;CTNNA1;CCL2	Golgi-associated vesicle (GO:0005798)	7/59	0.107558	0.695228	1.73077	3.85914	TMED10;LMAN1L;FURIN;CTSC;IGF2R;RAB8B;F5			phospholipase activator activity (GO:0016004)	2/6	0.0585337	0.97641	4.86263	13.8009	PDPK1;CCL3
response to tumor necrosis factor (GO:0034612)	16/98	0.000983455	0.0716939	2.3817	16.4919	GBA;ADAMTS12;YBX3;CX3CL1;RELA;CXCL16;ZFP36L1;ZFP36;CCL7;HYAL1;CCL4;ANKRD1;CCL3;CHI3L1;CCL2;ARHGEF2	clathrin-coated vesicle membrane (GO:0030665)	9/82	0.108132	0.688958	1.60111	3.56151	CD74;FZD5;DNAJC5;CLTA;AP2B1;IL7R;SLC18A1;EGFR;IGF2R			phosphatidylinositol kinase activity (GO:0052742)	7/52	0.0631632	1	1.96375	5.42396	PI4K2B;GAB1;PI4KA;PIK3CD;ATM;PIK3R1;PIK3CG
response to molecule of bacterial origin (GO:0002237)	16/99	0.00109987	0.0790514	2.35764	16.0616	FZD5;NOS3;SLC11A1;F2R;CXCL1;IRAK3;TNFRSF1B;CXCL2;FOXP1;TNFRSF1A;SELP;SRR;CD14;FCGR2B;JUNB;TLR4	recycling endosome membrane (GO:0055038)	6/48	0.108344	0.680583	1.82349	4.0526	EHD4;SCAMP1;B2M;RAB8B;SCAMP2;RAB11B			cytokine receptor activity (GO:0004896)	9/74	0.0655254	1	1.7742	4.83527	CX3CR1;CD74;IL10RB;IL1R2;IL10RA;CCR5;OSMR;IL7R;CD44
eosinophil chemotaxis (GO:0048245)	7/25	0.00112425	0.0796811	4.08461	27.7371	LGALS3;CCL7;CCL4;CCL3;CCL2;SCG2;CX3CL1	actin-based cell projection (GO:0098858)	8/71	0.111913	0.693237	1.64371	3.59978	SLC9A3R1;CLIC4;TGFB1;SPATA13;FSCN1;MSN;LCP1;CD44			zinc ion binding (GO:0008270)	28/303	0.0661731	1	1.34806	3.66062	BLM;TES;UHRF1;MYCBP2;CRIP2;CHD4;ECE1;MEFV;LITAF;KNG1;GLI2;TRIM8;TRIM28;ANPEP;TRIM2;RNPEP;ENPP1;TIMP1;KLF4;MMP9;SKI;CYLD;KLF7;MMP13;MDM2;ADAM8;ARHGEF2;S100A8
eosinophil migration (GO:0072677)	7/25	0.00112425	0.0785895	4.08461	27.7371	LGALS3;CCL7;CCL4;CCL3;CCL2;SCG2;CX3CL1	late endosome membrane (GO:0031902)	6/49	0.116723	0.713132	1.78627	3.83682	CD63;ANXA2;SLC11A1;LAMP2;ANXA6;LITAF			insulin-like growth factor binding (GO:0005520)	3/14	0.0662801	1	3.12598	8.48348	IGFBP5;IGFBP4;IGF1R
negative regulation of cell proliferation (GO:0008285)	41/364	0.00120226	0.0829069	1.64314	11.0478	APP;COL18A1;IFITM1;CDKN1A;TES;BTG1;NOTCH1;MAGED1;TGFB1I1;CXCL1;PTPRK;PKD2;AIF1;FAM129B;SLC9A3R1;LMNA;IGFBP7;SOX4;S100A11;CD33;RBM5;PBRM1;TGFB1;IGFBP5;NOS3;F2R;OSM;HMGA1;SOX11;EMP3;INHBA;KLF4;SKI;DLG3;HGS;ID2;IL1B;DLG5;IRF1;ALDH1A2;HSPA1A	nuclear chromosome part (GO:0044454)	33/393	0.132288	0.797305	1.22494	2.47777	BLM;UHRF1;PPP1R10;CHD4;BRCA2;ACTB;RELA;NIPBL;CHAF1B;SOX18;H2AFJ;TRPS1;EP400;JUNB;CENPT;UPF1;CREBBP;ACD;SMARCC1;HIST1H2AH;SETD1A;STAT3;INO80;THOC2;KLF4;ARID1A;SMARCA4;ZEB2;IRF1;MCM3;MCM5;ATM;TCF4			Rac guanyl-nucleotide exchange factor activity (GO:0030676)	3/14	0.0662801	1	3.12598	8.48348	TIAM1;SPATA13;ARHGEF2
cell migration involved in heart development (GO:0060973)	4/8	0.00123027	0.0837077	7.29395	48.8732	PDGFRB;NOTCH1;FLRT3;DCHS1	Golgi stack (GO:0005795)	4/29	0.133934	0.796464	2.01212	4.04518	CLN3;GCNT1;AKAP9;SORL1			RNA polymerase II distal enhancer sequence-specific DNA binding (GO:0000980)	7/53	0.0686747	1	1.9267	5.16043	SMARCC1;CHD4;BACH1;ACTB;RELA;NFKB1;SMARCA4
coronary vasculature morphogenesis (GO:0060977)	4/8	0.00123027	0.0826063	7.29395	48.8732	NRP1;SPRED1;NOTCH1;TGFBR1	clathrin-coated endocytic vesicle (GO:0045334)	6/51	0.134415	0.788803	1.71622	3.44416	CD74;MYO1E;FZD5;DVL2;CLTA;AP2B1			ATP-dependent helicase activity (GO:0008026)	10/86	0.0693106	1	1.69627	4.5276	DDX3Y;DDX17;EIF4A1;UPF1;BLM;DDX54;DDX21;DHX38;CHD4;CHD1
positive regulation of phagocytosis (GO:0050766)	9/40	0.00128042	0.0848566	3.28228	21.8618	C3;SLC11A1;IL1B;SIRPA;CCL2;NCKAP1L;CD300LF;FCGR2B;SIRPB1	specific granule lumen (GO:0035580)	7/63	0.138816	0.804053	1.62088	3.20059	ARG1;LCN2;CHI3L1;CXCL1;ORM2;B2M;NFKB1			androgen receptor binding (GO:0050681)	6/43	0.0713918	1	2.03552	5.3729	PRKCB;TGFB1I1;EP300;PIAS1;SMARCA4;FOXP1
nucleosome disassembly (GO:0006337)	6/19	0.00128055	0.0837774	4.6067	30.6828	SMARCC1;SUPT16H;PBRM1;HMGA1;ARID1A;SMARCA4	lateral element (GO:0000800)	2/10	0.146606	0.838283	2.91758	5.60178	BLM;BRCA2			transcriptional repressor activity, RNA polymerase II core promoter proximal region sequence-specific binding (GO:0001078)	11/98	0.071973	1	1.63742	4.3088	CREBBP;ZFHX3;CEBPB;TSHZ3;SP2;TSHZ1;ENO1;BACH1;SKIL;ETS2;RELA
chromatin disassembly (GO:0031498)	6/19	0.00128055	0.0827169	4.6067	30.6828	SMARCC1;SUPT16H;PBRM1;HMGA1;ARID1A;SMARCA4	myosin filament (GO:0032982)	2/10	0.146606	0.827672	2.91758	5.60178	MYH8;MYH9			phosphatidylinositol-3,4,5-trisphosphate binding (GO:0005547)	5/33	0.0721458	1	2.21029	5.81099	ADAP2;MAPKAP1;IQGAP1;OGT;MYO1G
protein complex assembly (GO:0006461)	25/190	0.00128674	0.0820779	1.91946	12.7752	DPAGT1;BLM;TMED10;AHNAK;NOL3;CX3CL1;SLC9A1;TRIM28;SH3PXD2B;EP300;FADD;CTSC;BCL9L;HGSNAT;CREBBP;SEC16A;FN1;SMARCA4;TNFRSF1A;F5;P2RX7;BCL9;PFKL;CXCL12;FERMT3	nuclear chromosome (GO:0000228)	6/53	0.153287	0.854577	1.65146	3.09721	NIPBL;PBRM1;BLM;SMC1A;NOL6;BRD4			telomeric DNA binding (GO:0042162)	5/33	0.0721458	1	2.21029	5.81099	UPF1;BLM;ACD;UPF3A;SMG7
aminoglycan catabolic process (GO:0006026)	8/33	0.00141419	0.0890937	3.53646	23.2034	HGSNAT;SDC3;IDS;SDC1;CHI3L1;AGRN;GNS;HSPG2	heterochromatin (GO:0000792)	5/42	0.15807	0.870361	1.73665	3.20363	UHRF2;UHRF1;INCENP;HMGA1;RNF40			RNA polymerase II regulatory region sequence-specific DNA binding (GO:0000977)	40/461	0.0739325	1	1.26576	3.2968	NFAT5;CEBPB;CHD4;ENO1;BACH1;LITAF;GLI3;ACTB;RELA;ETS2;ELK3;SOX18;TRPS1;CREB3L2;E2F2;JUNB;RREB1;SKIL;SMARCC1;ZFHX3;POU2F1;STAT3;RFX2;SOX11;RFX1;ACTN4;PBX1;NFKB1;FOSL2;NFATC4;SMARCA4;KLF7;KLF6;SP2;NFIB;IRF1;HOXD4;TCF4;SSBP3;JDP2
positive regulation of inflammatory response (GO:0050729)	13/74	0.00143768	0.0894695	2.56274	16.7724	OSM;OSMR;CX3CL1;TNFRSF1A;CCL4;CCL3;PDCD4;ADAM8;TLR6;TLR4;S100A8;MYD88;TLR2	platelet dense granule (GO:0042827)	3/21	0.170944	0.929771	2.08398	3.68118	SELP;CD63;LAMP2			MAP kinase tyrosine/serine/threonine phosphatase activity (GO:0017017)	2/7	0.0782974	1	4.16797	10.6168	DUSP1;DUSP6
positive regulation of nitric oxide biosynthetic process (GO:0045429)	7/26	0.00144837	0.0890484	3.92751	25.6754	EDN1;IL1B;TLR6;PKD2;KLF4;TLR4;ASS1	cytoplasmic dynein complex (GO:0005868)	3/21	0.170944	0.918569	2.08398	3.68118	DYNC1H1;DYNC1LI2;DCTN4			insulin-like growth factor II binding (GO:0031995)	2/7	0.0782974	1	4.16797	10.6168	IGFBP5;IGFBP4
positive regulation of nitric oxide metabolic process (GO:1904407)	7/26	0.00144837	0.0879883	3.92751	25.6754	EDN1;IL1B;TLR6;PKD2;KLF4;TLR4;ASS1	cell cortex region (GO:0099738)	2/11	0.171408	0.910093	2.65234	4.67797	NUMA1;ENO1			lipase activator activity (GO:0060229)	2/7	0.0782974	1	4.16797	10.6168	PDPK1;CCL3
phosphatidylinositol-mediated signaling (GO:0048015)	11/57	0.00149235	0.0895935	2.81521	18.3197	PDGFRB;CSF1R;EDN1;PLEKHA1;PI4KA;PIK3CD;PIK3R1;OGT;PIK3CG;IGF1R;ZFP36L1	axonal growth cone (GO:0044295)	2/11	0.171408	0.899386	2.65234	4.67797	OLFM1;FLRT3			ribosomal protein S6 kinase activity (GO:0004711)	2/7	0.0782974	1	4.16797	10.6168	RPS6KA4;RPS6KA1
cellular response to interleukin-1 (GO:0071347)	21/151	0.00151938	0.0901557	2.02878	13.1657	UPF1;MAP3K3;IL1RN;IL1R2;IRAK3;IL1RAP;ADAMTS12;NFKB1;CX3CL1;RELA;RPS6KA4;PSMD7;CCL7;HYAL1;TNIP2;IL1B;CCL4;ANKRD1;CCL3;CCL2;MYD88	integral component of endoplasmic reticulum membrane (GO:0030176)	12/129	0.174064	0.902704	1.35701	2.37251	DPAGT1;EXT1;SEC61A1;CLN3;CD74;SGPL1;SLC37A1;PIGT;SYVN1;RRBP1;PKD2;SPPL3			NAADP-sensitive calcium-release channel activity (GO:0072345)	2/7	0.0782974	1	4.16797	10.6168	TPCN2;TPCN1
positive regulation of multicellular organismal process (GO:0051240)	26/203	0.00154387	0.0905561	1.8684	12.095	NOTCH1;NUMA1;TGFB1I1;ENO1;METRNL;PPM1F;FAM129B;C1QTNF3;SYDE1;SDCBP;HYAL1;GCNT2;RREB1;SOX5;BCL9L;TGFB1;SLC11A1;SOX11;INHBA;TGFBR1;TGFBR2;COL1A1;TIAM1;OLFM1;DAB2;IL1B	intrinsic component of external side of plasma membrane (GO:0031233)	3/22	0.188497	0.96632	1.98926	3.31942	F10;CD14;EFNA5			1-phosphatidylinositol-4-phosphate 3-kinase activity (GO:0035005)	2/7	0.0782974	1	4.16797	10.6168	PIK3CD;PIK3CG
pattern recognition receptor signaling pathway (GO:0002221)	10/49	0.00155421	0.0901263	2.97712	19.2524	TRAF3;IRAK3;TLR6;CD14;TLR4;CTSS;S100A8;MYD88;TLR2;LGMN	P-body (GO:0000932)	7/69	0.192821	0.977251	1.47993	2.43596	ZFP36;CNOT3;SAMD4B;PUM1;DCP1A;TNRC6A;ZFP36L1			phosphatidylinositol phosphate kinase activity (GO:0016307)	3/15	0.078776	1	2.91758	7.41399	PIK3CD;PIP5K1C;PIK3CG
positive regulation of MAPK cascade (GO:0043410)	34/290	0.00155462	0.0891376	1.7103	11.0597	APP;NRP1;CSF1R;NOTCH1;SHC1;FPR2;ARRB2;CX3CL1;EGFR;PIK3CG;ICAM1;ROBO1;CTGF;IGF1R;CCL7;CCL4;GCNT2;CCL3;CCL2;EPHB2;PDGFRB;IL11;CD74;EDN1;TGFB1;ATP6AP1;F2R;OSM;TNFRSF1B;TNFRSF1A;TAOK1;CHI3L1;ADAM8;CD44	caveola (GO:0005901)	6/57	0.194223	0.973297	1.53557	2.51641	CLN3;PLVAP;NOS3;F2R;LRP8;TGFBR2			transmembrane receptor protein tyrosine phosphatase activity (GO:0005001)	3/15	0.078776	1	2.91758	7.41399	PTPRE;PTPRO;PTPRK
positive regulation of homeostatic process (GO:0032846)	14/84	0.00162533	0.0921564	2.43132	15.614	ATP6AP1;PPP1R10;STAT3;PIK3CD;INHBA;METRNL;SMARCA4;P2RX7;NPC1;SPP1;PLEKHM1;ADAM8;NCKAP1L;HSPA1A	invadopodium (GO:0071437)	2/12	0.196821	0.97536	2.43132	3.952	FSCN1;MSN			transmembrane receptor protein phosphatase activity (GO:0019198)	3/15	0.078776	1	2.91758	7.41399	PTPRE;PTPRO;PTPRK
positive regulation of calcium ion transport (GO:0051928)	8/34	0.00173969	0.0975566	3.43245	21.8099	PDGFRB;P2RX7;LGALS3;CXCL12;CCL4;F2R;CCL3;CCL2	neurotransmitter receptor complex (GO:0098878)	2/12	0.196821	0.964642	2.43132	3.952	DLG3;SCRIB			peptide N-acetyltransferase activity (GO:0034212)	3/15	0.078776	0.996387	2.91758	7.41399	CREBBP;KAT2A;EP300
branching involved in blood vessel morphogenesis (GO:0001569)	5/14	0.00178264	0.0988784	5.20996	32.9773	NRP1;COL4A1;NOTCH4;TGFBR2;ENG	recycling endosome (GO:0055037)	11/120	0.199849	0.968834	1.33722	2.15319	EHD4;FCHSD2;VPS53;MYO5A;SCAMP1;B2M;SORL1;SCAMP2;RAB11FIP5;RAB8B;RAB11B			phosphatidylinositol 3-kinase activity (GO:0035004)	9/77	0.080012	1	1.70508	4.30631	PDGFRB;GAB1;PIK3CD;ATM;PIK3R1;PIK3AP1;PIK3CG;VAV1;EGFR
regulation of pri-miRNA transcription from RNA polymerase II promoter (GO:1902893)	7/27	0.00184095	0.101015	3.78205	23.8173	TGFB1;NFIB;STAT3;LILRB4;RELA;NFATC4;SMARCA4	RNA polymerase II transcription factor complex (GO:0090575)	13/148	0.215163	1	1.28137	1.96864	CEBPB;POU2F1;STAT3;HMGA1;HNRNPAB;PBX1;BCL9;KAT2A;TRIM28;E2F2;TCF4;JUNB;BCL9L			GTPase binding (GO:0051020)	9/77	0.080012	0.990256	1.70508	4.30631	GIT2;FGD6;ADAP2;RASA1;GNB1;AGAP1;ENO1;LCP1;FNBP1L
integrin activation (GO:0033622)	4/9	0.00209455	0.113708	6.48351	39.993	CXCL12;FN1;CX3CL1;FERMT3	azurophil granule membrane (GO:0035577)	6/59	0.216086	1	1.48351	2.27286	CD63;NCSTN;DNAJC5;LAMP2;PSAP;PRCP			ubiquitin-like protein ligase binding (GO:0044389)	27/298	0.0842991	1	1.32172	3.26913	CDKN1A;CASC3;ARRB2;GABARAP;RELA;EGFR;FOXO1;TRIM28;POLR2A;BTBD3;UBE2H;FZD5;DTX3L;RPL23;TRAF1;TNFRSF1B;SMAD5;YWHAZ;RNF40;SKI;PRKAR1A;HGS;TRAF3;MDM2;UBE2O;TMBIM6;HSPA1A
negative regulation of heterotypic cell-cell adhesion (GO:0034115)	4/9	0.00209455	0.112511	6.48351	39.993	IL1RN;MYADM;MBP;KLF4	intermediate filament cytoskeleton (GO:0045111)	7/72	0.222551	1	1.41827	2.13108	MMP14;NDOR1;SLC1A4;INO80;VIM;SMG7;S100A8			transforming growth factor beta receptor binding (GO:0005160)	6/45	0.0851614	1	1.94505	4.79107	TGFB1;TGFBRAP1;INHBA;TGFBR1;TGFBR2;ENG
regulation of cell-cell adhesion involved in gastrulation (GO:0070587)	4/9	0.00209455	0.111339	6.48351	39.993	IL1RN;MYADM;MBP;KLF4	nuclear matrix (GO:0016363)	6/60	0.227319	1	1.45879	2.16105	CLIC4;BLM;NUMA1;UHRF1;SMC1A;RUNX1T1			protein kinase activator activity (GO:0030295)	7/56	0.086879	1	1.82349	4.45521	CDKN1A;DBF4;TAOK1;NCKAP1L;IQGAP1;STK4;MARK2
basement membrane organization (GO:0071711)	4/9	0.00209455	0.110191	6.48351	39.993	COL4A1;NID1;NID2;CTSS	cytoplasmic vesicle (GO:0031410)	18/216	0.227408	1	1.21566	1.8004	USP6NL;NRP1;CD63;RAB5B;GOLIM4;CLTA;ARRB2;FNBP1L;IGF2R;BICD2;MMP14;SNX18;SPRED1;TBC1D2;RUSC2;HYAL1;DVL2;RIN3			cysteine-type endopeptidase inhibitor activity involved in apoptotic process (GO:0043027)	4/25	0.0880858	1	2.33406	5.67048	TNFAIP8;TNFSF14;RPS6KA1;NOL3
regulation of methylation-dependent chromatin silencing (GO:0090308)	4/9	0.00209455	0.109066	6.48351	39.993	DNMT1;UHRF2;TRIM28;UHRF1	filopodium (GO:0030175)	6/61	0.238735	1	1.43487	2.05532	SPATA13;FSCN1;MSN;MYO5A;LCP1;ANTXR1			phosphatidylinositol phospholipase C activity (GO:0004435)	4/25	0.0880858	1	2.33406	5.67048	EDNRA;PLCG2;PLD4;CCR5
cellular response to acidic pH (GO:0071468)	4/9	0.00209455	0.107965	6.48351	39.993	IMPACT;SLC9A1;RAB11FIP5;RAB11B	histone methyltransferase complex (GO:0035097)	5/50	0.256833	1	1.45879	1.98297	SUZ12;AEBP2;SETD1B;SETD1A;CXXC1			aminopeptidase activity (GO:0004177)	5/35	0.0883686	1	2.08398	5.05624	MMP14;XPNPEP1;ANPEP;RNPEP;PRCP
epithelial tube morphogenesis (GO:0060562)	8/35	0.00212161	0.108266	3.33438	20.525	CSF1R;COL4A1;PRKX;SCRIB;PKD2;MEGF8;PKD1;GLI2	COPII-coated ER to Golgi transport vesicle (GO:0030134)	7/76	0.264435	1	1.34362	1.78723	CD74;TMED10;LMAN1L;SEC16A;B2M;CTSC;F5			MAP kinase kinase kinase activity (GO:0004709)	9/79	0.0906656	1	1.66191	3.98955	PDGFRB;CSF1R;MAP3K1;TAOK1;EPHB2;STK4;EGFR;MAP3K11;IGF1R
hyaluronan metabolic process (GO:0030212)	6/21	0.00227528	0.114958	4.16797	25.3648	TMEM2;TGFB1;HYAL1;IL1B;CD44;SLC9A1	endolysosome membrane (GO:0036020)	2/15	0.274851	1	1.94505	2.51208	CLTA;AP2B1			histone methyltransferase activity (H3-K4 specific) (GO:0042800)	3/16	0.0922074	1	2.73523	6.52001	SETD1B;SETD1A;CXXC1
positive regulation of protein phosphorylation (GO:0001934)	44/413	0.00244309	0.122227	1.55416	9.34747	CSF1R;APP;NRP1;CDKN1A;CCNT2;CCNT1;SHC1;FPR2;IQGAP1;EFNA5;STK4;LRP8;EGFR;CYR61;CAMKK2;IGF1R;C3;RPS6KA4;SDCBP;CCND2;CCND1;DVL2;EPHB2;PDGFRB;IL11;CD74;TGFB1;F2R;OSM;PLAUR;INHBA;TNFRSF1B;MMP9;TGFBR1;TNFRSF1A;DAB2;IL1B;AKAP9;CHI3L1;ITGA5;ARHGEF2;CARD14;CD44;ENG	intrinsic component of the cytoplasmic side of the plasma membrane (GO:0031235)	2/15	0.274851	1	1.94505	2.51208	RASA1;RASAL2			ion transmembrane transporter activity (GO:0015075)	5/36	0.0971316	1	2.0261	4.72422	SLC4A7;GJA1;LASP1;TRPV2;SLC4A2
response to cholesterol (GO:0070723)	5/15	0.00252416	0.125056	4.86263	29.0875	TGFB1;CCL3;CCR5;TGFBR1;TGFBR2	phagocytic vesicle membrane (GO:0030670)	4/39	0.277277	1	1.49619	1.91923	SLC11A1;RAC2;TCIRG1;B2M			phosphatidylinositol-4,5-bisphosphate 3-kinase activity (GO:0046934)	8/69	0.0988208	1	1.69135	3.91454	PDGFRB;GAB1;PIK3CD;PIK3R1;PIK3AP1;PIK3CG;VAV1;EGFR
myeloid cell development (GO:0061515)	5/15	0.00252416	0.123854	4.86263	29.0875	APP;ANXA2;NCKAP1L;FOXP1;TLR2	nuclear periphery (GO:0034399)	7/79	0.297162	1	1.2926	1.56854	AHCTF1;CLIC4;BLM;NUMA1;UHRF1;SMC1A;RUNX1T1			C-C chemokine binding (GO:0019957)	2/8	0.0997763	1	3.64697	8.40563	ZFP36;CCR5
negative regulation of cell-substrate adhesion (GO:0010812)	8/36	0.00256641	0.124727	3.24175	19.3379	NOTCH1;ADAM15;RASA1;PTPRO;GCNT2;TBCD;ACTN4;EFNA5	nuclear cyclin-dependent protein kinase holoenzyme complex (GO:0019908)	2/16	0.300943	1	1.82349	2.1897	CCNT2;CCNT1			sodium:bicarbonate symporter activity (GO:0008510)	2/8	0.0997763	1	3.64697	8.40563	SLC4A7;SLC4A2
protein kinase B signaling (GO:0043491)	8/36	0.00256641	0.123551	3.24175	19.3379	CDKN1A;TGFB1;IL1B;CCL3;MDM2;CCL2;FOXO1;ZFP36L1	cytoplasmic vesicle membrane (GO:0030659)	5/55	0.324597	1	1.32617	1.49217	APPBP2;AHNAK2;AP1B1;YWHAZ;MFSD10			growth factor receptor binding (GO:0070851)	10/93	0.103997	1	1.56859	3.55034	PDGFRB;IL11;SLC9A3R1;SDCBP;PLSCR1;HIP1;SHC1;IL1B;ITGA5;CD300LF
regulation of interferon-gamma production (GO:0032649)	9/44	0.00259334	0.123681	2.98389	17.7685	CD274;FZD5;SLC11A1;IL1B;PDE4B;FADD;CD14;TLR4;HAVCR2	platelet alpha granule membrane (GO:0031092)	2/17	0.326868	1	1.71622	1.91908	SELP;LHFPL2			CXCR chemokine receptor binding (GO:0045236)	3/17	0.106507	1	2.57433	5.76534	CXCL12;CXCL1;CXCL2
regulation of cell proliferation (GO:0042127)	71/741	0.00261367	0.123496	1.39776	8.31248	APP;COL18A1;CDKN1A;IFITM1;TES;BTG1;TGFB1I1;SLA;CXCL1;TCIRG1;PTPRK;BRCA2;PKD2;CXCL2;TNFSF13B;IGF1R;CCND2;TIMP1;JUNB;SOX4;CD33;RBM5;PDGFRB;IL11;EDN1;PBRM1;RPL23;F2R;RHOG;SOX11;EMP3;TNFRSF1B;OSMR;TGFBR1;PIAS1;TNFRSF1A;TGFBR2;TIAM1;HGS;IL1B;IRF1;ALDH1A2;ARHGEF2;CD47;CSF1R;NOTCH1;SHC1;REG3G;EGFR;RELA;FAM129B;ZFP36L1;SLC9A3R1;SDCBP;LMNA;GCNT2;IGFBP7;S100A11;TGFB1;NOS3;FN1;OSM;HMGA1;INHBA;KLF4;SKI;DLG3;…	endoplasmic reticulum-Golgi intermediate compartment (GO:0005793)	8/96	0.336619	1	1.21566	1.32361	TMED10;LMAN1L;ANPEP;FN1;NUCB1;SPPL3;CTSC;F5			phosphatidylinositol phosphate binding (GO:1901981)	9/82	0.108132	1	1.60111	3.56151	HIP1;ADAP2;MAPKAP1;NCF4;SH3PXD2B;ANKFY1;IQGAP1;OGT;MYO1G
primary neural tube formation (GO:0014020)	7/29	0.00286888	0.134311	3.52122	20.6126	SKI;TGFB1;LMO4;DVL2;PLXNB2;SCRIB;PHACTR4	tertiary granule lumen (GO:1904724)	5/56	0.338419	1	1.30249	1.41121	CSTB;CXCL1;B2M;MMP9;CTSS			tumor necrosis factor receptor superfamily binding (GO:0032813)	4/27	0.109935	1	2.16117	4.77157	TRAF3;FADD;TRAF1;MYD88
regulation of vascular endothelial growth factor receptor signaling pathway (GO:0030947)	6/22	0.00294918	0.136815	3.97852	23.1797	PRKCB;HGS;IL1B;MMRN2;ITGA5;FAM129B	integral component of lumenal side of endoplasmic reticulum membrane (GO:0071556)	3/30	0.339051	1	1.45879	1.57783	CD74;PKD2;SPPL3			protease binding (GO:0002020)	12/119	0.1152	1	1.47105	3.17907	COL1A1;ADAMTS4;CSTB;ANXA2;FN1;SYVN1;FURIN;FADD;TIMP1;BRCA2;NOL3;CD177
regulation of bone resorption (GO:0045124)	6/22	0.00294918	0.135583	3.97852	23.1797	P2RX7;CSF1R;ATP6AP1;SPP1;PLEKHM1;ADAM8	alpha DNA polymerase:primase complex (GO:0005658)	1/6	0.346969	1	2.43132	2.57359	MCM3			histone methyltransferase activity (GO:0042054)	6/49	0.116723	1	1.78627	3.83682	SUZ12;SETD2;SETD1B;SETD1A;SETDB2;ASH1L
regulation of calcium ion import (GO:0090279)	6/22	0.00294918	0.134372	3.97852	23.1797	PDGFRB;LGALS3;CXCL12;CCL3;CCL2;PKD2	clathrin coat (GO:0030118)	1/6	0.346969	1	2.43132	2.57359	CLTA			SUMO transferase activity (GO:0019789)	3/18	0.121603	1	2.43132	5.12276	PIAS3;MDM2;PIAS1
regulation of transforming growth factor beta receptor signaling pathway (GO:0017015)	13/80	0.0029587	0.133613	2.37053	13.8036	TGFB1;PDPK1;TGFB1I1;SOX11;TGFBR1;TGFBR2;SKI;SDCBP;DAB2;SKIL;ENG;BCL9L;HSPA1A	AP-3 adaptor complex (GO:0030123)	1/6	0.346969	1	2.43132	2.57359	AP3D1			chemokine binding (GO:0019956)	3/18	0.121603	1	2.43132	5.12276	CX3CR1;ZFP36;CCR5
positive regulation of ERK1 and ERK2 cascade (GO:0070374)	25/202	0.0030015	0.134357	1.80543	10.4871	APP;NRP1;CSF1R;NOTCH1;SHC1;FPR2;ARRB2;CX3CL1;EGFR;ICAM1;CTGF;IGF1R;CCL7;CCL4;GCNT2;CCL3;CCL2;EPHB2;PDGFRB;CD74;TGFB1;ATP6AP1;F2R;CHI3L1;CD44	FACIT collagen trimer (GO:0005593)	1/6	0.346969	1	2.43132	2.57359	COL12A1			transcriptional activator activity, RNA polymerase II distal enhancer sequence-specific binding (GO:0001205)	3/18	0.121603	1	2.43132	5.12276	HMGA1;RELA;NFKB1
calcium-mediated signaling (GO:0019722)	12/71	0.00302152	0.134077	2.46556	14.3052	SELP;SAMD14;EDN1;PDPK1;CCL3;PLCG2;FPR2;CCR5;EGFR;TPCN2;SLC9A1;CAMKK2	meiotic cohesin complex (GO:0030893)	1/6	0.346969	1	2.43132	2.57359	SMC1A			lysine-acetylated histone binding (GO:0070577)	3/18	0.121603	1	2.43132	5.12276	BRD2;SMARCA4;BRD4
positive regulation of NF-kappaB transcription factor activity (GO:0051092)	18/129	0.00307089	0.135093	2.03552	11.7771	APP;PRKCB;IRAK3;TRAF1;NFKB1;RELA;RPS6KA4;TRIM8;IL1B;ADAM8;ARHGEF2;TLR6;CARD14;TLR4;S100A8;MYD88;TLR2;HSPA1A	clathrin vesicle coat (GO:0030125)	1/6	0.346969	1	2.43132	2.57359	CLTA			phospholipase C activity (GO:0004629)	4/28	0.12168	1	2.08398	4.38962	EDNRA;PLCG2;PLD4;CCR5
heart development (GO:0007507)	20/150	0.00320674	0.139863	1.94505	11.1695	NOTCH1;TGFB1;CHD7;ECE1;PKD2;PKD1;TGFBR1;GLI2;TGFBR2;CDH5;GJA1;NIPBL;KAT2A;ADAP2;SOX18;FLRT3;SH3PXD2B;DVL2;MEGF8;SOX4	anchored component of external side of plasma membrane (GO:0031362)	2/18	0.352526	1	1.62088	1.68998	CD14;EFNA5			ubiquitin protein ligase binding (GO:0031625)	25/285	0.122512	1	1.27964	2.68666	CDKN1A;CASC3;ARRB2;GABARAP;RELA;EGFR;FOXO1;TRIM28;POLR2A;BTBD3;UBE2H;FZD5;RPL23;TRAF1;TNFRSF1B;SMAD5;YWHAZ;RNF40;SKI;PRKAR1A;TRAF3;MDM2;UBE2O;TMBIM6;HSPA1A
glycosaminoglycan biosynthetic process (GO:0006024)	15/100	0.00328506	0.142065	2.18818	12.5128	CSGALNACT1;B4GALT3;CHPF;SDC3;BGN;PRELP;HSPG2;DCN;NDST2;EXT1;HYAL1;IL1B;GCNT2;SDC1;AGRN	ESC/E(Z) complex (GO:0035098)	2/18	0.352526	1	1.62088	1.68998	SUZ12;AEBP2			MAP kinase phosphatase activity (GO:0033549)	2/9	0.122643	1	3.24175	6.80276	DUSP1;DUSP6
macrophage chemotaxis (GO:0048246)	4/10	0.00330233	0.141612	5.83516	33.337	LGALS3;CCL3;SAA1;CCL2	early endosome (GO:0005769)	17/223	0.360638	1	1.11208	1.13419	NRP1;RAB5B;FZD5;DTX3L;F2R;TGFBRAP1;MYO5A;SORL1;EGFR;IGF2R;CLN3;HGS;ANKFY1;RIN3;B2M;LLGL1;RAB11FIP5			superoxide-generating NADPH oxidase activator activity (GO:0016176)	2/9	0.122643	1	3.24175	6.80276	SH3PXD2B;NCF4
positive regulation of bone remodeling (GO:0046852)	4/10	0.00330233	0.140432	5.83516	33.337	ATP6AP1;SPP1;PLEKHM1;ADAM8	endosomal part (GO:0044440)	3/32	0.37737	1	1.36761	1.33278	APP;CD63;EGFR			BMP binding (GO:0036122)	2/9	0.122643	1	3.24175	6.80276	NBL1;ENG
T cell chemotaxis (GO:0010818)	4/10	0.00330233	0.139271	5.83516	33.337	CCL3;PIK3CD;PIK3CG;CXCL16	insulin-responsive compartment (GO:0032593)	1/7	0.391748	1	2.08398	1.95298	MYO5A			phosphatidylinositol-4,5-bisphosphate binding (GO:0005546)	7/61	0.122676	1	1.67402	3.51244	SDCBP;SNX18;ADAP2;ANXA2;MAPKAP1;SLC9A1;MYO1G
macrophage migration (GO:1905517)	4/10	0.00330233	0.138129	5.83516	33.337	LGALS3;CCL3;SAA1;CCL2	H3 histone acetyltransferase complex (GO:0070775)	1/7	0.391748	1	2.08398	1.95298	BRPF1			CCR chemokine receptor binding (GO:0048020)	5/39	0.125895	1	1.87024	3.87571	CCL7;CCL4;CCL3;CCL2;CX3CL1
positive regulation of smooth muscle cell migration (GO:0014911)	4/10	0.00330233	0.137006	5.83516	33.337	PDGFRB;NRP1;DOCK4;AIF1	multivesicular body lumen (GO:0097486)	1/7	0.391748	1	2.08398	1.95298	NAPSA			Rho GTPase binding (GO:0017048)	8/73	0.125896	1	1.59867	3.31292	DOCK4;RALBP1;FMNL1;MYO9B;TNFAIP1;ARHGEF2;SRGAP3;YBX3
positive regulation of bone resorption (GO:0045780)	4/10	0.00330233	0.135901	5.83516	33.337	ATP6AP1;SPP1;PLEKHM1;ADAM8	multivesicular body membrane (GO:0032585)	1/7	0.391748	1	2.08398	1.95298	CD63			RNA polymerase II transcription cofactor activity (GO:0001104)	9/85	0.127349	1	1.5446	3.18316	MED12;CREBBP;TRIM28;ANKRD1;SOX11;PPRC1;SOX4;SMARCA4;HSPA1A
negative regulation of MAPK cascade (GO:0043409)	13/81	0.00330813	0.135051	2.34127	13.3718	DUSP1;GBA;IRAK3;SORL1;DUSP6;FOXO1;IGF1R;P2RX7;SLC9A3R1;SPRED1;IL1B;EPHB2;TLR4	THO complex part of transcription export complex (GO:0000445)	1/7	0.391748	1	2.08398	1.95298	THOC2			transmembrane receptor protein tyrosine kinase activity (GO:0004714)	7/62	0.130622	1	1.64702	3.35243	PDGFRB;NRP1;CSF1R;EPHB2;EGFR;IGF2R;IGF1R
negative regulation of intrinsic apoptotic signaling pathway (GO:2001243)	11/63	0.00341961	0.138494	2.54709	14.463	CXCL12;PLAUR;SYVN1;MDM2;TMBIM6;ENO1;ARHGEF2;NOL3;YBX3;MMP9;HSPA1A	actin cortical patch (GO:0030479)	1/7	0.391748	1	2.08398	1.95298	HIP1			histone deacetylase binding (GO:0042826)	9/86	0.134132	1	1.52664	3.06691	NIPBL;KAT2A;CCND1;SP2;ANKRD1;CHD4;GLI3;RELA;HSPA1A
second-messenger-mediated signaling (GO:0019932)	11/63	0.00341961	0.137404	2.54709	14.463	SAMD14;EDN1;DGKD;PDPK1;NOS3;CCL3;PLCG2;FPR2;CCR5;TPCN2;CAMKK2	oxoglutarate dehydrogenase complex (GO:0045252)	1/7	0.391748	1	2.08398	1.95298	KAT2A			transcriptional repressor activity, RNA polymerase II transcription regulatory region sequence-specific binding (GO:0001227)	15/160	0.13491	1	1.36761	2.73954	CREBBP;ZFHX3;CEBPB;TSHZ3;TSHZ1;ENO1;BACH1;ETS2;NFKB1;RELA;NFATC4;ZEB2;SP2;TRPS1;SKIL
cellular response to pH (GO:0071467)	5/16	0.0034662	0.138188	4.55872	25.8237	IMPACT;HYAL1;SLC9A1;RAB11B;RAB11FIP5	MOZ/MORF histone acetyltransferase complex (GO:0070776)	1/7	0.391748	1	2.08398	1.95298	BRPF1			transforming growth factor beta binding (GO:0050431)	3/19	0.137424	1	2.30335	4.57142	TGFBR1;TGFBR2;ENG
cardiac epithelial to mesenchymal transition (GO:0060317)	5/16	0.0034662	0.137116	4.55872	25.8237	OLFM1;NOTCH1;PDCD4;TGFBR1;ENG	micro-ribonucleoprotein complex (GO:0035068)	1/7	0.391748	1	2.08398	1.95298	TNRC6A			ephrin receptor binding (GO:0046875)	3/19	0.137424	1	2.30335	4.57142	SHC1;EFNA5;PIK3CG
lipopolysaccharide-mediated signaling pathway (GO:0031663)	5/16	0.0034662	0.136062	4.55872	25.8237	TGFB1;IL1B;CCL3;CCL2;TLR4	endocytic patch (GO:0061645)	1/7	0.391748	1	2.08398	1.95298	HIP1			acetylation-dependent protein binding (GO:0140033)	3/19	0.137424	1	2.30335	4.57142	BRD2;SMARCA4;BRD4
hyaluronan catabolic process (GO:0030214)	5/16	0.0034662	0.135023	4.55872	25.8237	TMEM2;TGFB1;HYAL1;CD44;SLC9A1	early endosome membrane (GO:0031901)	6/74	0.397182	1	1.1828	1.09215	RAB5B;FZD5;LITAF;B2M;LLGL1;EGFR			protein tyrosine phosphatase activity (GO:0004725)	7/63	0.138816	1	1.62088	3.20059	DUSP11;PTPRE;DUSP1;PTPRO;PTPRK;DUSP6;CDC14B
negative regulation of lymphocyte proliferation (GO:0050672)	7/30	0.00352399	0.136234	3.40384	19.2254	CD274;CEBPB;ARG1;DLG5;SOX11;ATM;FCGR2B	nuclear heterochromatin (GO:0005720)	2/20	0.402714	1	1.45879	1.32681	UHRF2;UHRF1			SH3/SH2 adaptor activity (GO:0005070)	6/52	0.143709	1	1.68322	3.26539	ITSN2;SHF;LASP1;ARHGAP1;GAB1;SKAP2
tube closure (GO:0060606)	7/30	0.00352399	0.13521	3.40384	19.2254	SKI;TGFB1;LMO4;DVL2;PLXNB2;SCRIB;PHACTR4	main axon (GO:0044304)	3/34	0.415202	1	1.28717	1.13141	MBP;NAV1;KCNAB2			cysteine-type endopeptidase inhibitor activity (GO:0004869)	6/52	0.143709	1	1.68322	3.26539	CSTB;TNFAIP8;TNFSF14;RPS6KA1;NOL3;KNG1
regulation of small GTPase mediated signal transduction (GO:0051056)	19/141	0.0035603	0.135584	1.96574	11.0827	RALBP1;TRIO;PLEKHG2;ARHGAP1;RHOG;MYO9B;GMIP;ARHGAP25;MYO9A;VAV1;VAV2;GNA13;SYDE1;TIAM1;ARHGAP30;RAC2;ARHGEF1;SRGAP3;ARHGEF2	clathrin-coated endocytic vesicle membrane (GO:0030669)	3/34	0.415202	1	1.28717	1.13141	CD74;FZD5;AP2B1			microtubule minus-end binding (GO:0051011)	2/10	0.146606	1	2.91758	5.60178	MACF1;NUMA1
cellular response to transforming growth factor beta stimulus (GO:0071560)	15/101	0.00361944	0.136815	2.16652	12.1789	TGFB1;TGFBRAP1;FURIN;PTPRK;ARRB2;SMAD5;TGFBR1;ZFP36L1;TGFBR2;SKI;CDH5;ANKRD1;GCNT2;ZYX;SOX5	fibrillar center (GO:0001650)	10/132	0.41916	1	1.10514	0.960925	DUSP11;DAB2;KLF6;NFIB;ANKRD1;TAX1BP3;NFKBIE;RREB1;CHD1;RAI14			protein kinase C activity (GO:0004697)	2/10	0.146606	1	2.91758	5.60178	PRKCB;CCL3
epithelial to mesenchymal transition (GO:0001837)	8/38	0.00367207	0.137784	3.07114	17.2199	DDX17;OLFM1;NOTCH1;TGFB1;TRIM28;DLG5;HNRNPAB;TGFBR1	cis-Golgi network (GO:0005801)	4/48	0.419834	1	1.21566	1.05506	BCL9;TMED10;AKAP9;GOLIM4			vinculin binding (GO:0017166)	2/10	0.146606	1	2.91758	5.60178	ACTN1;CTNNA1
cellular response to amyloid-beta (GO:1904646)	6/23	0.0037617	0.140117	3.80554	21.2459	APP;FPR2;TLR6;FCGR2B;TLR4;IGF1R	endoplasmic reticulum-Golgi intermediate compartment membrane (GO:0033116)	4/48	0.419834	1	1.21566	1.05506	TMED10;SPPL3;CTSC;F5			Tat protein binding (GO:0030957)	2/10	0.146606	1	2.91758	5.60178	ACTB;SMARCA4
regulation of cell size (GO:0008361)	6/23	0.0037617	0.139101	3.80554	21.2459	SLC9A3R1;EDN1;PLEK;MSN;VAV1;VAV2	autolysosome (GO:0044754)	1/8	0.433458	1	1.82349	1.52436	LAMP2			phosphotransferase activity, for other substituted phosphate groups (GO:0016780)	2/10	0.146606	1	2.91758	5.60178	DPAGT1;PGS1
regulation of cell differentiation (GO:0045595)	17/122	0.00400153	0.146905	2.03274	11.2229	DDX17;SUZ12;CREBBP;TGFB1;PRKCB;NOTCH4;KLF4;SUPT6H;TGFBR1;CTGF;SKI;LGALS3;TIAM1;TRPS1;RPS6KA1;JUNB;SKIL	microvillus membrane (GO:0031528)	1/8	0.433458	1	1.82349	1.52436	SLC9A3R1			I-SMAD binding (GO:0070411)	2/10	0.146606	1	2.91758	5.60178	TGFB1I1;TGFBR1
regulation of protein phosphorylation (GO:0001932)	30/262	0.00402466	0.146699	1.67037	9.21261	APP;CSF1R;FPR2;EFNA5;STK4;EGFR;CYR61;CAMKK2;C3;SLC9A3R1;SPRED1;CCND2;CCND1;DVL2;EPHB2;BRD4;CD74;TGFB1;ATP6AP2;FN1;PLAUR;INHBA;MMP9;DAB2;IMPACT;IL1B;MYADM;PLXNB2;CARD14;ENG	clathrin-sculpted gamma-aminobutyric acid transport vesicle membrane (GO:0061202)	1/8	0.433458	1	1.82349	1.52436	DNAJC5			oxidized purine DNA binding (GO:0032357)	2/10	0.146606	1	2.91758	5.60178	MSH6;BLM
positive regulation of transmembrane receptor protein serine/threonine kinase signaling pathway (GO:0090100)	13/83	0.00410761	0.148661	2.28485	12.5551	NOTCH1;TGFB1;NUMA1;TGFB1I1;SOX11;INHBA;SULF1;CYR61;TGFBR1;SDCBP;DAB2;UBE2O;ENG	COPI-coated vesicle (GO:0030137)	1/8	0.433458	1	1.82349	1.52436	TMED10			nucleosomal DNA binding (GO:0031492)	4/30	0.146667	1	1.94505	3.7337	SMARCC1;CHD4;ACTB;SMARCA4
positive regulation of macromolecule biosynthetic process (GO:0010557)	19/143	0.00416546	0.149693	1.93825	10.6234	PDGFRB;CIITA;EDN1;TGFB1;SHC1;F2R;GBA;UPF3A;KLF4;NFKB1;EGFR;IGF1R;GLI2;DBF4;CCL2;VIM;TLR4;SOX4;TLR2	death-inducing signaling complex (GO:0031264)	1/8	0.433458	1	1.82349	1.52436	FADD			small GTPase binding (GO:0031267)	7/64	0.147254	1	1.59555	3.05643	GIT2;FGD6;ADAP2;SPHK2;MAPKAP1;AGAP1;SORL1
positive regulation of cellular metabolic process (GO:0031325)	14/93	0.00428331	0.152851	2.19603	11.975	PDGFRB;CD63;CDKN1A;EDN1;TGFB1;ANXA2;UHRF1;ECE1;SCRIB;ARRB2;INHBA;KLF4;TGFBR2;TBC1D5	HFE-transferrin receptor complex (GO:1990712)	1/8	0.433458	1	1.82349	1.52436	B2M			mRNA 3'-UTR binding (GO:0003730)	7/64	0.147254	1	1.59555	3.05643	ZFP36;IGF2BP2;PUM1;YBX3;RNF40;RBMS3;ZFP36L1
connective tissue development (GO:0061448)	7/31	0.00428695	0.151919	3.29404	17.9597	HYAL1;SH3PXD2B;CREB3L2;CHI3L1;SULF1;PKD1;CD44	perinuclear endoplasmic reticulum (GO:0097038)	1/8	0.433458	1	1.82349	1.52436	OSBPL3			phosphatidylinositol binding (GO:0035091)	10/101	0.153872	1	1.44435	2.70329	MYO1E;SNX18;HIP1;NUMA1;PITPNM1;PLEKHA1;SH3PXD2B;ANKFY1;SNX7;SNX30
phosphatidylinositol 3-kinase signaling (GO:0014065)	7/31	0.00428695	0.150871	3.29404	17.9597	EDN1;PLEKHA1;PIK3CD;PIK3R1;PIK3CG;ZFP36L1;IGF1R	clathrin-sculpted gamma-aminobutyric acid transport vesicle (GO:0061200)	1/8	0.433458	1	1.82349	1.52436	DNAJC5			protein phosphatase 2A binding (GO:0051721)	3/20	0.153896	1	2.18818	4.09514	SMG7;FOXO1;CTTNBP2NL
positive regulation of reactive oxygen species biosynthetic process (GO:1903428)	7/31	0.00428695	0.149838	3.29404	17.9597	EDN1;IL1B;TLR6;PKD2;KLF4;TLR4;ASS1	shelterin complex (GO:0070187)	1/8	0.433458	1	1.82349	1.52436	ACD			glutamate receptor binding (GO:0035254)	3/20	0.153896	1	2.18818	4.09514	HIP1;DLG3;SCRIB
positive regulation of cyclin-dependent protein serine/threonine kinase activity (GO:0045737)	7/31	0.00428695	0.148818	3.29404	17.9597	CCNT2;CCND2;CCNT1;CCND1;PKD2;PKD1;EGFR	condensed nuclear chromosome (GO:0000794)	3/35	0.433844	1	1.25039	1.04416	SMC1A;NOL6;BRD4			transition metal ion binding (GO:0046914)	33/400	0.154876	1	1.2035	2.24469	MOXD1;BLM;TES;UHRF1;MYCBP2;ECE1;CRIP2;CHD4;MEFV;LITAF;KNG1;GLI2;TRIM8;TRIM28;TRIM2;ANPEP;RNPEP;ENPP1;TIMP1;ARG1;NOS3;KLF4;MMP9;SKI;CYLD;KLF7;MMP13;XPNPEP1;LCN2;MDM2;ADAM8;ARHGEF2;S100A8
positive regulation of tumor necrosis factor production (GO:0032760)	9/48	0.00479712	0.165404	2.73523	14.6054	FZD5;CCL3;FADD;CD14;ARHGEF2;ORM2;TLR4;HAVCR2;TLR2	chromosomal region (GO:0098687)	6/77	0.434512	1	1.13672	0.947492	CENPT;BLM;INCENP;CDCA8;ATM;SMC1A			histone acetyltransferase activity (GO:0004402)	5/42	0.15807	1	1.73665	3.20363	CREBBP;KAT2A;EP300;EPC1;BRCA2
regulation of integrin-mediated signaling pathway (GO:2001044)	4/11	0.00490973	0.16815	5.30469	28.2026	CD63;TIMP1;CD177;PHACTR4	PML body (GO:0016605)	5/63	0.435388	1	1.15777	0.962705	TRIM8;SKI;CIITA;BLM;PIAS1			AU-rich element binding (GO:0017091)	3/21	0.170944	1	2.08398	3.68118	ZFP36;ZFP36L1;RBMS3
T cell proliferation (GO:0042098)	4/11	0.00490973	0.167029	5.30469	28.2026	TNFSF14;SLC11A1;MSN;PIK3CG	nucleoplasm part (GO:0044451)	29/408	0.447388	1	1.03688	0.833995	ZCCHC8;CDKN1A;PPP1R10;CXXC1;STK4;POLR2A;SNAPC3;DVL2;SH3BGRL3;RREB1;RAB8B;CENPT;SUZ12;ATF7IP;CREBBP;ACD;ZFHX3;SETD1B;SETD1A;INO80;ACTN4;ZWINT;SKI;DBF4;INCENP;MDM2;UBE2O;RAPGEF5;OGT			chemokine receptor activity (GO:0004950)	3/21	0.170944	1	2.08398	3.68118	CX3CR1;GPR35;CCR5
negative regulation of translation, ncRNA-mediated (GO:0040033)	4/11	0.00490973	0.165923	5.30469	28.2026	TNRC6C;ZFP36;STAT3;TNRC6A	microtubule end (GO:1990752)	2/22	0.450972	1	1.32617	1.0561	NIN;NUMA1			phosphatidylinositol-3,5-bisphosphate binding (GO:0080025)	3/21	0.170944	1	2.08398	3.68118	HIP1;MAPKAP1;SH3PXD2B
miRNA mediated inhibition of translation (GO:0035278)	4/11	0.00490973	0.164831	5.30469	28.2026	TNRC6C;ZFP36;STAT3;TNRC6A	transcriptionally active chromatin (GO:0035327)	2/22	0.450972	1	1.32617	1.0561	ELL;SUPT6H			sodium:potassium-exchanging ATPase activity (GO:0005391)	2/11	0.171408	1	2.65234	4.67797	ATP1B3;ATP1A1
regulation of BMP signaling pathway (GO:0030510)	10/57	0.00496818	0.165704	2.55928	13.5762	SKI;NOTCH1;NUMA1;UBE2O;SOX11;SULF1;NBL1;SKIL;CYR61;ENG	INO80-type complex (GO:0097346)	2/22	0.450972	1	1.32617	1.0561	EP400;INO80			tumor necrosis factor receptor binding (GO:0005164)	2/11	0.171408	1	2.65234	4.67797	TRAF3;TRAF1
positive regulation of reactive oxygen species metabolic process (GO:2000379)	8/40	0.005114	0.169459	2.91758	15.3925	PDGFRB;CDKN1A;TGFB1;FPR2;TLR6;TLR4;CD177;TGFBR2	chromosome, centromeric region (GO:0000775)	4/50	0.451027	1	1.16703	0.929224	CENPT;INCENP;CDCA8;SMC1A			potassium-transporting ATPase activity (GO:0008556)	2/11	0.171408	1	2.65234	4.67797	ATP1B3;ATP1A1
inositol lipid-mediated signaling (GO:0048017)	8/40	0.005114	0.168366	2.91758	15.3925	PDGFRB;CSF1R;PI4KA;PIK3CD;PIK3R1;OGT;PIK3CG;IGF1R	nuclear chromosome, telomeric region (GO:0000784)	8/108	0.463394	1	1.08058	0.831163	UPF1;ACD;PPP1R10;MCM3;ATM;MCM5;THOC2;BRCA2			hexosaminidase activity (GO:0015929)	2/11	0.171408	1	2.65234	4.67797	TMEM2;HYAL1
negative regulation of macromolecule metabolic process (GO:0010605)	17/125	0.00513702	0.16804	1.98395	10.458	APP;NOTCH1;TGFB1;SOX11;WWP2;PARP14;KLF4;NFKB1;OLFM1;SDCBP;ID2;MYADM;CCL3;ANXA7;HAVCR2;RBMS3;ENG	RISC-loading complex (GO:0070578)	1/9	0.47231	1	1.62088	1.21585	ZFP36			thioesterase binding (GO:0031996)	2/11	0.171408	1	2.65234	4.67797	TRAF3;TRAF1
regulation of inflammatory response (GO:0050727)	21/167	0.00515199	0.167456	1.83441	9.66433	GBA;METRNL;MEFV;ADAMTS12;KLF4;CX3CL1;RELA;FOXP1;TNFRSF1A;CDH5;C1QTNF3;CCL4;CCL3;PDCD4;SAA1;PIK3AP1;TLR4;S100A8;MYD88;TLR2;BRD4	endoplasmic reticulum quality control compartment (GO:0044322)	1/9	0.47231	1	1.62088	1.21585	SYVN1			galanin receptor activity (GO:0004966)	2/11	0.171408	1	2.65234	4.67797	CYSLTR1;GPR84
negative regulation of cell-cell adhesion (GO:0022408)	7/32	0.0051684	0.166926	3.1911	16.8018	IL1RN;TGFB1;MYADM;MBP;FXYD5;KLF4;ASS1	Swr1 complex (GO:0000812)	1/9	0.47231	1	1.62088	1.21585	EP400			caspase binding (GO:0089720)	2/11	0.171408	1	2.65234	4.67797	FADD;NOL3
skeletal system morphogenesis (GO:0048705)	7/32	0.0051684	0.165876	3.1911	16.8018	SKI;MMP13;IFT140;ANKRD11;SOX11;MEGF8;TGFBR1	axon initial segment (GO:0043194)	1/9	0.47231	1	1.62088	1.21585	NAV1			immunoglobulin binding (GO:0019865)	2/11	0.171408	1	2.65234	4.67797	LGALS3;FCGR2B
regulation of protein localization to early endosome (GO:1902965)	3/6	0.00549274	0.175184	7.29395	37.9601	DTX3L;MSN;SORL1	juxtaparanode region of axon (GO:0044224)	1/9	0.47231	1	1.62088	1.21585	KCNAB2			calcium-dependent protein serine/threonine kinase activity (GO:0009931)	2/11	0.171408	1	2.65234	4.67797	PRKCB;CCL3
B cell chemotaxis (GO:0035754)	3/6	0.00549274	0.174096	7.29395	37.9601	CH25H;PIK3CD;CYP7B1	late endosome lumen (GO:0031906)	1/9	0.47231	1	1.62088	1.21585	NAPSA			protein serine/threonine kinase activator activity (GO:0043539)	4/32	0.173438	1	1.82349	3.19463	DBF4;TAOK1;IQGAP1;STK4
response to lipoteichoic acid (GO:0070391)	3/6	0.00549274	0.173021	7.29395	37.9601	CD14;RELA;TLR2	U5 snRNP (GO:0005682)	2/23	0.474257	1	1.26851	0.946318	MAPKBP1;PRPF8			anion:cation symporter activity (GO:0015296)	5/44	0.181189	1	1.65772	2.83173	SLC10A4;SLC4A7;SLC6A6;SLC13A3;SLC4A2
regulation of epithelial to mesenchymal transition involved in endocardial cushion formation (GO:1905005)	3/6	0.00549274	0.17196	7.29395	37.9601	TGFBR1;ENG;TGFBR2	ribonucleoprotein granule (GO:0035770)	6/81	0.483575	1	1.08058	0.785098	DDX3Y;PITPNM1;NFKBIZ;IQGAP1;DCP1A;ACTB			Rac GTPase binding (GO:0048365)	5/44	0.181189	1	1.65772	2.83173	DOCK4;RALBP1;FMNL1;SRGAP3;ARHGEF2
macrophage derived foam cell differentiation (GO:0010742)	3/6	0.00549274	0.170911	7.29395	37.9601	TGFB1;SOAT1;EP300	nuclear body (GO:0016604)	43/619	0.486926	1	1.01338	0.729269	ZCCHC8;CDKN1A;BLM;CIITA;ELL;PPP1R10;CXXC1;STK4;CYGB;TRIM8;DUSP11;ADAMTS4;SNAPC3;NFKBIZ;DVL2;EP400;SH3BGRL3;RREB1;RAB8B;DDX17;CENPT;SUZ12;ATF7IP;BRD2;CREBBP;ACD;ZFHX3;SETD1A;INO80;ACTN4;PUM1;DGKZ;ZWINT;NFATC4;PIAS1;SKI;DBF4;INCENP;MDM2;AGGF1;UBE2O;RAPGEF5;HSPA1A			1-phosphatidylinositol-3-kinase activity (GO:0016303)	5/44	0.181189	1	1.65772	2.83173	GAB1;PIK3CD;ATM;PIK3R1;PIK3CG
release of sequestered calcium ion into cytosol by sarcoplasmic reticulum (GO:0014808)	3/6	0.00549274	0.169875	7.29395	37.9601	CCL3;NOL3;CCR5	nucleolar part (GO:0044452)	11/154	0.488929	1	1.04199	0.745585	DUSP11;DAB2;KLF6;POLR1A;NFIB;ANKRD1;TAX1BP3;NFKBIE;RREB1;CHD1;RAI14			cholesterol binding (GO:0015485)	5/44	0.181189	1	1.65772	2.83173	NPC1;SOAT1;OSBPL3;ANXA6;ERLIN1
gland morphogenesis (GO:0022612)	3/6	0.00549274	0.168852	7.29395	37.9601	SLC9A3R1;TGFB1;MSN	chromosome, telomeric region (GO:0000781)	9/125	0.489308	1	1.05033	0.750737	UPF1;BLM;ACD;PPP1R10;MCM3;ATM;MCM5;THOC2;BRCA2			RNA helicase activity (GO:0003724)	7/68	0.183285	1	1.50169	2.54795	DDX3Y;DDX17;EIF4A1;UPF1;DDX54;DDX21;DHX38
positive regulation of protein localization to endosome (GO:1905668)	3/6	0.00549274	0.167841	7.29395	37.9601	DTX3L;MSN;SORL1	pre-autophagosomal structure (GO:0000407)	2/24	0.496932	1	1.21566	0.850113	ATG2A;ULK3			ATP-dependent RNA helicase activity (GO:0004004)	7/68	0.183285	1	1.50169	2.54795	DDX3Y;DDX17;EIF4A1;UPF1;DDX54;DDX21;DHX38
cellular response to bacterial lipopeptide (GO:0071221)	3/6	0.00549274	0.166842	7.29395	37.9601	CD14;TLR6;TLR2	late endosome (GO:0005770)	10/141	0.502915	1	1.0346	0.711118	CD63;CLN3;ANXA2;EXOC8;SLC11A1;LAMP2;F2R;ANXA6;MYO5A;IGF2R			transition metal ion transmembrane transporter activity (GO:0046915)	4/33	0.187409	1	1.76823	2.96083	SLC30A7;SLC11A1;SLC39A6;SLC39A7
positive regulation of oxidative stress-induced cell death (GO:1903209)	3/6	0.00549274	0.165855	7.29395	37.9601	MMP3;TLR6;TLR4	cytoplasmic microtubule (GO:0005881)	3/39	0.505899	1	1.12215	0.764651	CYLD;NUMA1;SAA1			actinin binding (GO:0042805)	3/22	0.188497	1	1.98926	3.31942	PKD2;RELA;NFKB1
negative regulation of glial cell proliferation (GO:0060253)	3/6	0.00549274	0.164879	7.29395	37.9601	SKI;NOTCH1;SOX11	primary lysosome (GO:0005766)	1/10	0.508499	1	1.45879	0.986567	STXBP2			core promoter proximal region DNA binding (GO:0001159)	3/22	0.188497	1	1.98926	3.31942	CREBBP;UHRF1;KLF4
neutrophil extravasation (GO:0072672)	3/6	0.00549274	0.163915	7.29395	37.9601	PIK3CD;PIK3CG;CD177	CatSper complex (GO:0036128)	1/10	0.508499	1	1.45879	0.986567	HSPA2			zinc ion transmembrane transporter activity (GO:0005385)	3/22	0.188497	1	1.98926	3.31942	SLC30A7;SLC39A6;SLC39A7
foam cell differentiation (GO:0090077)	3/6	0.00549274	0.162962	7.29395	37.9601	TGFB1;SOAT1;EP300	mitotic spindle midzone (GO:1990023)	1/10	0.508499	1	1.45879	0.986567	NUMA1			RNA-dependent ATPase activity (GO:0008186)	7/69	0.192821	1	1.47993	2.43596	DDX3Y;DDX17;EIF4A1;UPF1;DDX54;DDX21;DHX38
cellular response to lipoteichoic acid (GO:0071223)	3/6	0.00549274	0.16202	7.29395	37.9601	CD14;RELA;TLR2	filopodium tip (GO:0032433)	1/10	0.508499	1	1.45879	0.986567	MYO5A			transferase activity, transferring acyl groups other than amino-acyl groups (GO:0016747)	6/57	0.194223	1	1.53557	2.51641	CREBBP;SOAT1;ZDHHC9;NMT1;EP300;ZDHHC8
positive regulation of cellular extravasation (GO:0002693)	3/6	0.00549274	0.161089	7.29395	37.9601	PLVAP;ADAM8;ICAM1	cytoplasmic ribonucleoprotein granule (GO:0036464)	12/171	0.509609	1	1.02371	0.690096	DDX3Y;ZFP36;PITPNM1;CNOT3;NFKBIZ;SAMD4B;IQGAP1;PUM1;DCP1A;ACTB;TNRC6A;ZFP36L1			Ral GTPase binding (GO:0017160)	2/12	0.196821	1	2.43132	3.952	RALBP1;EXOC8
positive regulation of protein localization to early endosome (GO:1902966)	3/6	0.00549274	0.160168	7.29395	37.9601	DTX3L;MSN;SORL1	axon (GO:0030424)	10/142	0.51205	1	1.02732	0.687616	APP;OLFM1;NRP1;NFIB;PTPRO;GARS;IQGAP1;EPHB2;LLGL1;IGF1R			transcriptional repressor activity, RNA polymerase II activating transcription factor binding (GO:0098811)	2/12	0.196821	1	2.43132	3.952	NOTCH1;KLF4
negative regulation of cellular response to hypoxia (GO:1900038)	3/6	0.00549274	0.159258	7.29395	37.9601	TMBIM6;ENO1;NOL3	ER to Golgi transport vesicle membrane (GO:0012507)	4/55	0.526254	1	1.06094	0.681091	CD74;TMED10;SEC16A;B2M			annealing activity (GO:0097617)	2/12	0.196821	1	2.43132	3.952	BLM;EIF4H
regulation of adiponectin secretion (GO:0070163)	3/6	0.00549274	0.158358	7.29395	37.9601	C1QTNF3;IL1B;RAB11FIP5	mitotic spindle (GO:0072686)	6/85	0.531238	1	1.02973	0.651354	MAPKBP1;NIN;NUMA1;PKD2;SMC1A;CDC14B			protein kinase regulator activity (GO:0019887)	10/108	0.205633	1	1.35073	2.1364	SOCS3;CDKN1A;CCNT2;CCNT1;PRKAR1A;FLRT3;BGN;NCKAP1L;MARK2;DCN
regulation of peptidyl-tyrosine phosphorylation (GO:0050730)	13/86	0.0055923	0.160323	2.20515	11.4367	APP;NRP1;IL11;CD74;TGFB1;OSM;EFNA5;LRP8;SAMSN1;EGFR;ITGA5;ARHGEF2;CD44	condensed chromosome (GO:0000793)	3/41	0.540095	1	1.06741	0.657534	SMC1A;NOL6;BRD4			ADP binding (GO:0043531)	3/23	0.206484	1	1.90277	3.00168	MSH6;MYH9;MYO9B
transforming growth factor beta receptor signaling pathway (GO:0007179)	12/77	0.00594837	0.169578	2.27344	11.6505	SKI;CDH5;TGFB1;TGFBRAP1;GCNT2;ZYX;FURIN;PTPRK;ARRB2;SMAD5;TGFBR1;TGFBR2	spindle pole centrosome (GO:0031616)	1/11	0.542208	1	1.32617	0.811756	NUMA1			calcium-release channel activity (GO:0015278)	3/23	0.206484	1	1.90277	3.00168	PKD2;TPCN2;TPCN1
establishment or maintenance of apical/basal cell polarity (GO:0035088)	5/18	0.00606207	0.17186	4.05219	20.6893	CLIC4;DLG3;FSCN1;SCRIB;MARK2	proton-transporting V-type ATPase complex (GO:0033176)	1/11	0.542208	1	1.32617	0.811756	TCIRG1			RNA polymerase II transcription factor binding (GO:0001085)	11/122	0.21475	1	1.3153	2.02331	SPEN;CREBBP;ID2;TRPS1;STAT3;ANKRD1;EP300;CHD4;WWP2;LDB2;KLF4
acute-phase response (GO:0006953)	5/18	0.00606207	0.17091	4.05219	20.6893	IL1RN;CEBPB;PLSCR1;IL1B;SAA1	CD40 receptor complex (GO:0035631)	1/11	0.542208	1	1.32617	0.811756	TRAF3			carboxylic acid binding (GO:0031406)	4/35	0.216352	1	1.66719	2.55221	TMEM2;PSAP;ASS1;CD44
positive regulation of peptidyl-tyrosine phosphorylation (GO:0050731)	16/117	0.00617346	0.173094	1.99493	10.1492	CSF1R;NRP1;IL11;CD74;TGFB1;STAT3;OSM;EFNA5;PARP14;LRP8;TNFRSF1A;SOCS3;DLG3;ITGA5;ARHGEF2;CD44	STAGA complex (GO:0030914)	1/11	0.542208	1	1.32617	0.811756	KAT2A			kinase activity (GO:0016301)	23/281	0.216605	1	1.19403	1.82648	MAP3K3;CSNK1G3;MAP3K1;DGKD;CHKA;SPHK2;PDPK1;PIK3CD;CDC42BPB;STK4;DGKZ;PIK3CG;TGFBR1;PAPSS1;TAOK1;RPS6KA1;PI4KA;CCL3;CCL2;ATM;DGKK;MAP3K11;MAP3K12
positive regulation of tumor necrosis factor superfamily cytokine production (GO:1903557)	7/33	0.00617915	0.172307	3.0944	15.7399	CCL3;ADAM8;FADD;CD14;ARHGEF2;TLR4;TLR2	aggresome (GO:0016235)	3/42	0.556673	1	1.04199	0.610376	DVL2;RANGAP1;HSPA1A			phosphotransferase activity, alcohol group as acceptor (GO:0016773)	21/255	0.221023	1	1.20136	1.81343	MAP3K3;CSNK1G3;MAP3K1;DGKD;CHKA;SPHK2;PIK3CD;CDC42BPB;STK4;DGKZ;PIK3CG;TGFBR1;PAPSS1;HK3;TAOK1;PI4KA;CCL3;CCL2;DGKK;MAP3K11;MAP3K12
regulation of cell-cell adhesion (GO:0022407)	7/33	0.00617915	0.171371	3.0944	15.7399	TGFB1;SIRPA;ADAM8;CD47;EFNA5;SIRPB1;FERMT3	replication fork (GO:0005657)	2/27	0.56107	1	1.08058	0.62448	BLM;UHRF1			carbohydrate kinase activity (GO:0019200)	2/13	0.222647	1	2.24429	3.3713	HK3;NAGK
positive regulation of transcription factor import into nucleus (GO:0042993)	7/33	0.00617915	0.170444	3.0944	15.7399	APP;TRIM28;IL1B;PIK3R1;SPPL3;TLR4;TLR2	bicellular tight junction (GO:0005923)	5/73	0.566818	1	0.999171	0.567246	CDH5;TBCD;CLDN2;YBX3;TGFBR1			microtubule plus-end binding (GO:0051010)	2/13	0.222647	1	2.24429	3.3713	NUMA1;MAPRE1
regulation of nitric oxide biosynthetic process (GO:0045428)	7/33	0.00617915	0.169528	3.0944	15.7399	EDN1;IL1B;TLR6;PKD2;KLF4;TLR4;ASS1	integral component of nuclear inner membrane (GO:0005639)	1/12	0.573607	1	1.21566	0.675675	P2RX7			platelet-derived growth factor receptor binding (GO:0005161)	2/13	0.222647	1	2.24429	3.3713	PDGFRB;ITGA5
negative regulation of gene expression (GO:0010629)	59/619	0.00639606	0.174541	1.39045	7.02463	APP;CIITA;ENO1;PTPRK;LDB2;GLI3;ELK3;PTBP1;NIPBL;ZFP36;TRIM28;SOX18;ANXA7;EPC1;HAVCR2;ZC3H10;IGFBP5;SOX11;FOXP1;HIC2;OLFM1;AEBP2;IRF1;MYADM;ENG;RBMS3;DNMT1;NOTCH1;TSHZ3;SHC1;FOXO1;PPM1F;RELA;FAM129B;CCL3;IGF2BP2;MTA3;RUNX1T1;SUZ12;ATF7IP;SPEN;TGFB1;POU2F1;SETDB2;HMGA1;SAMD4B;WWP2;NR2F2;KLF4;PARP14;NFKB1;SMARCA4;DAB2;MEX3A;ID2;CNOT3;MDM2;PDCD4;HSPA1A	pericentric heterochromatin (GO:0005721)	1/12	0.573607	1	1.21566	0.675675	INCENP			ionotropic glutamate receptor binding (GO:0035255)	2/13	0.222647	1	2.24429	3.3713	DLG3;SCRIB
positive regulation of protein kinase B signaling (GO:0051897)	17/128	0.00652268	0.177049	1.93745	9.75018	PDGFRB;TGFB1;HIP1;F10;GAB1;PIK3CD;PIK3R1;PIK3CG;TGFBR1;VAV1;EGFR;GCNT2;CCL3;CHI3L1;ADAM8;PIK3AP1;ENG	filopodium membrane (GO:0031527)	1/12	0.573607	1	1.21566	0.675675	ANTXR1			ubiquitin-ubiquitin ligase activity (GO:0034450)	2/13	0.222647	1	2.24429	3.3713	UBR5;UBE4B
transcription from RNA polymerase II promoter (GO:0006366)	48/486	0.00694258	0.18745	1.44078	7.16079	NFAT5;CDKN1A;SETD2;CEBPB;CCNT2;NOTCH1;ELL;CCNT1;TGFB1I1;NOTCH4;DDX21;CASC3;ARRB2;MED15;SUPT6H;RELA;CTGF;MED12;POLR2A;TRIM28;CCND1;SOX18;TRPS1;SNAPC3;SNAPC4;DVL2;E2F2;DHX38;HIVEP3;RREB1;SOX5;CREBBP;SUPT16H;PBRM1;ZFHX3;POU2F1;KLF13;LMO4;ASH1L;THOC2;KLF4;NFKB1;NFATC4;KAT2A;FUBP1;IRF1;TCF4;CREB5	synaptonemal complex (GO:0000795)	2/29	0.600463	1	1.00606	0.513147	BLM;BRCA2			GTPase inhibitor activity (GO:0005095)	2/13	0.222647	1	2.24429	3.3713	CDC42SE1;IQGAP1
response to interleukin-6 (GO:0070741)	4/12	0.00696877	0.187167	4.86263	24.1494	SELPLG;CHI3L1;RELA;NFKB1	catenin complex (GO:0016342)	2/29	0.600463	1	1.00606	0.513147	CDH5;CTNNA1			guanylate kinase activity (GO:0004385)	2/13	0.222647	1	2.24429	3.3713	DLG3;SCRIB
regulation of hormone secretion (GO:0046883)	4/12	0.00696877	0.186187	4.86263	24.1494	IL11;EDN1;OSM;SOX11	brush border membrane (GO:0031526)	2/29	0.600463	1	1.00606	0.513147	GNA13;MFSD10			ATP binding (GO:0005524)	21/256	0.226301	1	1.19666	1.77811	BLM;ABCD3;MYO9B;IRAK3;HSPA2;ATP1A1;CDC42BPB;STK4;TGFBR1;RPS6KA4;MSH6;P2RX7;SRR;PFKL;TAOK1;MYH8;ENPP1;MYH9;MARK2;MYO1F;HSPA1A
negative regulation of signal transduction (GO:0009968)	31/284	0.00702192	0.18663	1.59234	7.89597	CSF1R;GBA;PLEK;ADAMTS12;GLI3;EGFR;FAM129B;IGF1R;MED12;SOCS3;SLC9A3R1;ENPP1;EPHB2;PHACTR4;PDGFRB;IGFBP5;PRKCB;WWP2;IRAK3;SULF1;DCN;PTPRE;MMP14;HGS;IL1B;MMRN2;ULK3;TAX1BP3;TMBIM6;MEGF8;LGMN	smooth endoplasmic reticulum (GO:0005790)	1/13	0.602854	1	1.12215	0.567896	SYVN1			protein-lysine N-methyltransferase activity (GO:0016279)	5/48	0.230736	1	1.51957	2.22842	SETD2;SETD1B;SETD1A;SETDB2;ASH1L
positive regulation of sequence-specific DNA binding transcription factor activity (GO:0051091)	25/216	0.00712977	0.188514	1.68841	8.34663	APP;CRTC3;LRP8;RELA;RPS6KA4;TRIM8;DVL2;EP300;EDN1;PRKCB;IRAK3;TRAF1;PPRC1;NFKB1;SMARCA4;IL1B;ADAM8;ARHGEF2;TLR6;TLR4;CARD14;S100A8;MYD88;TLR2;HSPA1A	endoribonuclease complex (GO:1902555)	1/13	0.602854	1	1.12215	0.567896	ZFP36			cytokine receptor binding (GO:0005126)	12/138	0.237212	1	1.26851	1.82513	SDCBP;IL11;IL1RN;SPRED1;TGFB1;CXCL12;IL1B;TGFBRAP1;OSM;FADD;INHBA;CD300LF
response to amyloid-beta (GO:1904645)	6/26	0.00719301	0.189206	3.36644	16.6122	APP;FPR2;TLR6;FCGR2B;TLR4;IGF1R	DNA-directed RNA polymerase I complex (GO:0005736)	1/13	0.602854	1	1.12215	0.567896	POLR1A			miRNA binding (GO:0035198)	3/25	0.243481	1	1.75055	2.47302	ZC3H10;DDX21;PUM1
regulation of DNA damage response, signal transduction by p53 class mediator (GO:0043516)	6/26	0.00719301	0.188236	3.36644	16.6122	CD74;SPRED1;ANKRD1;MDM2;ATM;CD44	nuclear telomere cap complex (GO:0000783)	1/13	0.602854	1	1.12215	0.567896	ACD			sterol binding (GO:0032934)	5/49	0.243692	1	1.48856	2.10163	NPC1;SOAT1;OSBPL3;ANXA6;ERLIN1
positive regulation of neutrophil migration (GO:1902624)	6/26	0.00719301	0.187275	3.36644	16.6122	CD74;RAC2;CXCL1;NCKAP1L;ADAM8;CXCL2	perinuclear region of cytoplasm (GO:0048471)	25/379	0.609356	1	0.962262	0.476659	APP;CLIC4;MVP;ARHGAP1;ECE1;AIF1;YBX3;TNFSF13B;SLC9A3R1;SLK;VPS53;UBR5;TPD52;OSBPL3;MSN;MYO9B;ACTN4;RANGAP1;NPC1;FAT1;MCM3;AGGF1;LCP1;TLR4;HSPA1A			snRNA binding (GO:0017069)	4/37	0.246399	1	1.57707	2.20917	CCNT2;CCNT1;DDX21;PRPF8
regulation of protein metabolic process (GO:0051246)	10/60	0.00720519	0.18664	2.43132	11.9936	APP;TRAF3;HGS;BTBD3;GBA;PLAUR;MDM2;FURIN;IGF2BP2;KLF4	multivesicular body (GO:0005771)	2/30	0.619135	1	0.972526	0.46626	CD63;NAPSA			transmembrane receptor protein serine/threonine kinase activity (GO:0004675)	2/14	0.248708	1	2.08398	2.89981	TGFBR1;TGFBR2
positive regulation of protein serine/threonine kinase activity (GO:0071902)	16/119	0.00726223	0.187167	1.9614	9.66002	PDGFRB;CSF1R;EDN1;CCNT2;TGFB1;CCNT1;PIK3CG;EGFR;ROBO1;CCND2;CCND1;IL1B;CHI3L1;ADAM8;TLR6;CARD14	U2-type catalytic step 2 spliceosome (GO:0071007)	2/30	0.619135	1	0.972526	0.46626	AQR;PRPF8			transcription coactivator binding (GO:0001223)	2/14	0.248708	1	2.08398	2.89981	CCNT2;RPL23
positive regulation of cell-cell adhesion (GO:0022409)	7/34	0.00733012	0.187968	3.00339	14.764	IL1B;GCNT2;SIRPA;CD47;CX3CL1;SIRPB1;CD44	nuclear nucleosome (GO:0000788)	1/14	0.630096	1	1.04199	0.481279	CENPT			amyloid-beta binding (GO:0001540)	5/50	0.256833	1	1.45879	1.98297	CD74;FZD5;EPHB2;FCGR2B;SORL1
neural tube closure (GO:0001843)	7/34	0.00733012	0.187028	3.00339	14.764	SKI;TGFB1;LMO4;DVL2;PLXNB2;SCRIB;PHACTR4	MHC class II protein complex (GO:0042613)	1/14	0.630096	1	1.04199	0.481279	CD74			transmembrane receptor protein kinase activity (GO:0019199)	6/63	0.262056	1	1.38932	1.86058	PDGFRB;CSF1R;EPHB2;EGFR;IGF1R;TGFBR2
platelet aggregation (GO:0070527)	7/34	0.00733012	0.186098	3.00339	14.764	STXBP3;STXBP1;PLEK;MYH9;PIK3CG;ACTB;FERMT3	transcription factor TFTC complex (GO:0033276)	1/14	0.630096	1	1.04199	0.481279	KAT2A			epidermal growth factor receptor binding (GO:0005154)	3/26	0.262362	1	1.68322	2.2522	PLSCR1;HIP1;SHC1
cellular response to tumor necrosis factor (GO:0071356)	23/195	0.00768694	0.19419	1.72062	8.37639	PLVAP;TNFSF14;GBA;ADAMTS12;TNFRSF1B;YBX3;CX3CL1;RELA;ZFP36L1;TNFSF13B;TNFRSF1A;ZFP36;PSMD7;CCL7;HYAL1;TRAF3;CCL4;ANKRD1;CCL3;CHI3L1;CCL2;ARHGEF2;CARD14	microtubule plus-end (GO:0035371)	1/14	0.630096	1	1.04199	0.481279	NUMA1			3',5'-cyclic-AMP phosphodiesterase activity (GO:0004115)	2/15	0.274851	1	1.94505	2.51208	PDE1B;PDE4B
regulation of sprouting angiogenesis (GO:1903670)	5/19	0.00776976	0.195316	3.83892	18.6476	TMEM2;PDPK1;E2F2;ITGA5;KLF4	dystrophin-associated glycoprotein complex (GO:0016010)	1/14	0.630096	1	1.04199	0.481279	SNTB2			interleukin-1 receptor binding (GO:0005149)	2/15	0.274851	1	1.94505	2.51208	IL1RN;IL1B
Rac protein signal transduction (GO:0016601)	5/19	0.00776976	0.194358	3.83892	18.6476	TIAM1;RHOG;ELMO1;RAC2;AIF1	vacuole (GO:0005773)	4/63	0.634945	1	0.926215	0.420703	CLN3;CD74;TBC1D5;GABARAP			insulin-like growth factor receptor binding (GO:0005159)	2/15	0.274851	1	1.94505	2.51208	SHC1;PIK3R1
response to interferon-beta (GO:0035456)	5/19	0.00776976	0.19341	3.83892	18.6476	IFITM3;IFITM1;PLSCR1;IFITM2;IRF1	spindle (GO:0005819)	12/187	0.63586	1	0.936121	0.423854	CDC20;CYLD;NIN;NUMA1;TBL1XR1;INCENP;CDCA8;NEDD9;HSPA2;PKD2;MAPRE1;CDC14B			steroid hormone receptor binding (GO:0035258)	7/77	0.275237	1	1.32617	1.71092	PRKCB;TGFB1I1;EP300;DDX54;FOXP1;PIAS1;SMARCA4
regulation of interleukin-6 production (GO:0032675)	8/43	0.00804045	0.199177	2.71403	13.0905	IL1B;GBA;NCKAP1L;IRAK3;ARHGEF2;TLR4;MYD88;TLR2	spindle midzone (GO:0051233)	2/31	0.637127	1	0.941154	0.42426	NUMA1;CDCA8			potassium ion transmembrane transporter activity (GO:0015079)	4/39	0.277277	1	1.49619	1.91923	KCNK6;PKD2;KCNN4;SLC12A7
endocytosis (GO:0006897)	29/264	0.00818607	0.201804	1.60246	7.70032	APP;PLD4;FPR2;SNX30;CORO1A;LRP8;CXCL16;CLN3;DPYSL2;RAC2;PIP5K1C;CD14;SNX7;PDLIM7;CSNK1G3;RALBP1;CD93;SLC11A1;RHOG;HSPG2;SORL1;IGF2R;GAK;MYO1E;SNX18;SAA1;RIN3;FCGR2B;LRP12	lamellar body (GO:0042599)	1/15	0.655471	1	0.972526	0.410797	NAPSA			alpha-tubulin binding (GO:0043014)	3/27	0.281415	1	1.62088	2.05515	ARL4C;SETD2;INO80
negative regulation of T cell activation (GO:0050868)	7/35	0.00863225	0.211781	2.91758	13.8651	CD274;LGALS3;CEBPB;ARG1;DLG5;FCGR2B;HAVCR2	mitochondrial respiratory chain complex III (GO:0005750)	1/15	0.655471	1	0.972526	0.410797	UQCRB			adenyl ribonucleotide binding (GO:0032559)	22/280	0.283524	1	1.14619	1.44473	BLM;ABCD3;MYO9B;IRAK3;HSPA2;ATP1A1;CDC42BPB;STK4;TGFBR1;RPS6KA4;MSH6;P2RX7;SRR;PFKL;TAOK1;PDE4B;MYH8;ENPP1;MYH9;MARK2;MYO1F;HSPA1A
regulation of protein kinase B signaling (GO:0051896)	20/164	0.00869402	0.212275	1.77901	8.44162	PDGFRB;TGFB1;HIP1;F10;PLEKHA1;GAB1;PIK3CD;PIK3R1;ARRB2;PIK3CG;TGFBR1;VAV1;EGFR;SLC9A3R1;GCNT2;CCL3;CHI3L1;ADAM8;PIK3AP1;ENG	Cul2-RING ubiquitin ligase complex (GO:0031462)	1/15	0.655471	1	0.972526	0.410797	ZSWIM6			transcription factor activity, RNA polymerase II distal enhancer sequence-specific binding (GO:0003705)	6/65	0.285932	1	1.34657	1.68591	CEBPB;ZFHX3;HMGA1;RFX1;RELA;NFKB1
regulation of NF-kappaB import into nucleus (GO:0042345)	6/27	0.00872218	0.211949	3.24175	15.372	APP;C1QTNF3;CYLD;IL1B;TLR4;TLR2	Ino80 complex (GO:0031011)	1/15	0.655471	1	0.972526	0.410797	INO80			peptide-lysine-N-acetyltransferase activity (GO:0061733)	4/40	0.292945	1	1.45879	1.79106	CREBBP;KAT2A;EP300;EPC1
negative regulation of cytokine production (GO:0001818)	15/111	0.00875037	0.211626	1.97134	9.34149	SRGN;CD274;SLC11A1;GBA;UBE2L6;IRAK3;MEFV;RPS6KA4;CYLD;TRAF3;PDCD4;NCKAP1L;FCGR2B;TLR4;HAVCR2	autophagosome (GO:0005776)	4/65	0.659446	1	0.897716	0.373769	CLN3;TBC1D5;LAMP2;GABARAP			ligand-dependent nuclear receptor transcription coactivator activity (GO:0030374)	6/66	0.298042	1	1.32617	1.60536	MED12;PRKCB;ACTN1;HMGA1;ACTN4;PPRC1
regulation of tumor necrosis factor production (GO:0032680)	10/62	0.00908227	0.218617	2.35289	11.0619	ZFP36;CCL3;IRAK3;ARHGEF2;FADD;CD14;TLR4;HAVCR2;FOXP1;TLR2	CHD-type complex (GO:0090545)	1/16	0.679106	1	0.911743	0.352825	CHD4			cyclin-dependent protein serine/threonine kinase regulator activity (GO:0016538)	3/28	0.300584	1	1.56299	1.87876	CDKN1A;CCNT2;CCNT1
bleb assembly (GO:0032060)	3/7	0.00912447	0.218602	6.25195	29.3642	P2RX7;EMP1;EMP3	vacuolar proton-transporting V-type ATPase complex (GO:0016471)	1/16	0.679106	1	0.911743	0.352825	TCIRG1			RNA polymerase II core promoter sequence-specific DNA binding (GO:0000979)	3/28	0.300584	1	1.56299	1.87876	POU2F1;SOX11;RREB1
dolichyl diphosphate biosynthetic process (GO:0006489)	3/7	0.00912447	0.21758	6.25195	29.3642	DPAGT1;SRD5A3;DHDDS	NuRD complex (GO:0016581)	1/16	0.679106	1	0.911743	0.352825	CHD4			retinoic acid receptor binding (GO:0042974)	2/16	0.300943	1	1.82349	2.1897	HMGA1;ACTN4
positive regulation of apoptotic cell clearance (GO:2000427)	3/7	0.00912447	0.216568	6.25195	29.3642	C3;CCL2;CD300LF	pericentriolar material (GO:0000242)	1/16	0.679106	1	0.911743	0.352825	NIN			G-protein coupled chemoattractant receptor activity (GO:0001637)	2/16	0.300943	1	1.82349	2.1897	CX3CR1;CCR5
release of sequestered calcium ion into cytosol by endoplasmic reticulum (GO:1903514)	3/7	0.00912447	0.215565	6.25195	29.3642	CCL3;NOL3;CCR5	Golgi cisterna (GO:0031985)	3/51	0.688601	1	0.858111	0.320155	GCNT1;SORL1;LLGL1			peptidoglycan binding (GO:0042834)	2/16	0.300943	1	1.82349	2.1897	REG3G;TLR2
positive regulation of cyclin-dependent protein serine/threonine kinase activity involved in G1/S transition of mitotic cell cycle (GO:0031659)	3/7	0.00912447	0.214572	6.25195	29.3642	PKD2;PKD1;EGFR	microtubule (GO:0005874)	13/211	0.694879	1	0.89878	0.327172	MACF1;DYNC1H1;NUMA1;TBCD;IQGAP1;KCNAB2;CYLD;TBL1XR1;DPYSL2;SAA1;ARHGEF2;MAPRE1;MAP3K11			DNA polymerase binding (GO:0070182)	2/16	0.300943	1	1.82349	2.1897	ACD;SMARCA4
sensory organ morphogenesis (GO:0090596)	3/7	0.00912447	0.213588	6.25195	29.3642	SKI;NIPBL;GLI3	nuclear replisome (GO:0043601)	1/17	0.701121	1	0.858111	0.304694	MCM3			four-way junction DNA binding (GO:0000400)	2/16	0.300943	1	1.82349	2.1897	MSH6;BLM
regulation of endocytic recycling (GO:2001135)	3/7	0.00912447	0.212613	6.25195	29.3642	ARHGAP1;SORL1;RAB11B	DNA-directed RNA polymerase II, core complex (GO:0005665)	1/17	0.701121	1	0.858111	0.304694	POLR2A			DNA helicase activity (GO:0003678)	4/41	0.308724	1	1.42321	1.67271	BLM;CHD4;INO80;CHD1
vesicle transport along actin filament (GO:0030050)	3/7	0.00912447	0.211646	6.25195	29.3642	MYO5A;ACTN4;FNBP1L	nuclear DNA-directed RNA polymerase complex (GO:0055029)	3/53	0.713544	1	0.82573	0.278693	POLR2A;POLR1A;MCM3			calcium ion binding (GO:0005509)	22/285	0.312319	1	1.12608	1.31046	TPD52;TPM4;NOTCH4;IQGAP1;NOL3;PKD2;AIF1;CAMKK2;PGS1;SELP;CDH5;PLSCR1;TMEM2;SRR;MMP13;PITPNM1;ENPP1;ADAM8;LCP1;AGRN;S100A8;SLC25A24
dolichyl diphosphate metabolic process (GO:0046465)	3/7	0.00912447	0.210688	6.25195	29.3642	DPAGT1;SRD5A3;DHDDS	microtubule organizing center (GO:0005815)	32/508	0.717375	1	0.918922	0.305227	ITSN2;CLIC4;NUMA1;DCTN4;SLC1A4;CHD4;BRCA2;BICD2;CDC14B;GNAI2;RNF19A;CEP170;CTSC;RAB11FIP5;SPAG9;SPECC1;DYNC1H1;PPP1R12A;IFT140;TBCD;SCLT1;SKI;CYLD;DYNC1LI2;KAT2A;NIN;PITPNM1;AKAP9;MCM3;MAPRE1;MAP3K11;HSPA1A			ATP-dependent DNA helicase activity (GO:0004003)	3/29	0.319812	1	1.50909	1.7204	BLM;CHD4;CHD1
positive regulation of interleukin-6 production (GO:0032755)	8/44	0.00925093	0.212646	2.65234	12.421	IL1B;F2R;MBP;ARHGEF2;TLR6;TLR4;MYD88;TLR2	MHC protein complex (GO:0042611)	1/18	0.721626	1	0.810438	0.264404	CD74			kinesin binding (GO:0019894)	3/29	0.319812	1	1.50909	1.7204	SPAG9;PLEKHM2;ACTB
branching morphogenesis of an epithelial tube (GO:0048754)	8/44	0.00925093	0.211693	2.65234	12.421	NRP1;COL4A1;NOTCH4;PKD2;PKD1;GLI2;TGFBR2;ENG	endocytic vesicle lumen (GO:0071682)	1/18	0.721626	1	0.810438	0.264404	SAA1			protein kinase inhibitor activity (GO:0004860)	6/68	0.322535	1	1.28717	1.45649	SOCS3;CDKN1A;SPRED1;FLRT3;BGN;DCN
chemokine-mediated signaling pathway (GO:0070098)	9/53	0.00933306	0.212619	2.47719	11.5789	CXCL12;CCL7;GPR35;CCL4;CCL3;CCL2;CXCL1;CXCL2;CX3CL1	SCF ubiquitin ligase complex (GO:0019005)	3/55	0.736915	1	0.795703	0.242915	FBXL20;SPSB1;BTBD3			ATPase activity, coupled (GO:0042623)	8/95	0.326187	1	1.22845	1.37622	DDX17;MSH6;MYO1E;BLM;MYH9;HSPA2;SMARCA4;HSPA1A
positive regulation of cytokine production (GO:0001819)	25/221	0.00943638	0.214017	1.65021	7.69525	CEBPB;RELA;C3;C1QTNF3;PDE4B;EP300;CD14;FADD;HAVCR2;CREBBP;TGFB1;FZD5;SLC11A1;PUM1;SULF1;NFKB1;IL1B;IRF1;SAA1;ARHGEF2;TLR6;TLR4;MYD88;TLR2;HSPA1A	autophagosome membrane (GO:0000421)	1/19	0.740726	1	0.767784	0.230431	GABARAP			proton-transporting ATPase activity, rotational mechanism (GO:0046961)	2/17	0.326868	1	1.71622	1.91908	ATP6V1B2;TCIRG1
regulation of nitric-oxide synthase biosynthetic process (GO:0051769)	4/13	0.0095264	0.215103	4.48858	20.8885	EDN1;CCL2;TLR4;TLR2	condensed chromosome kinetochore (GO:0000777)	1/19	0.740726	1	0.767784	0.230431	AHCTF1			phosphatidic acid binding (GO:0070300)	2/17	0.326868	1	1.71622	1.91908	PITPNM1;MAPKAP1
negative regulation of hormone secretion (GO:0046888)	4/13	0.0095264	0.214155	4.48858	20.8885	IL11;IL1B;OSM;RAB11FIP5	integral component of plasma membrane (GO:0005887)	94/1464	0.767508	1	0.936654	0.247844	KCNK6;APP;CSF3R;PLXND1;PTPRO;SLC2A1;IL1RAP;PTPRK;SLC7A11;TCIRG1;SLC4A2;PKD2;PVR;PKD1;SIRPB1;ICAM1;IGF1R;ROBO1;GJA1;CYSLTR1;EDNRA;CLEC5A;SLC39A6;ENPP1;EMB;EPHB2;CCR5;SLC18A1;CD33;PDGFRB;SEMA6B;SLC13A3;GPR35;SLC11A1;F2R;SCRIB;TNFRSF1B;OSMR;TGFBR1;TNFRSF1A;TGFBR2;PLSCR1;MMP14;TMEM2;SLC7A8;NPC1;SLCO4A1;TRAF3;TMBIM6;ADAM8;TLR6;TLR4;CD44;ENG;TLR2;CX3CR1;CD63;CSF1R;SELPLG;NOTCH4;SLC1A4;FPR2;GPR84;PCDH19…			H4 histone acetyltransferase activity (GO:0010485)	2/17	0.326868	1	1.71622	1.91908	BRCA2;OGT
diacylglycerol metabolic process (GO:0046339)	4/13	0.0095264	0.213216	4.48858	20.8885	PGS1;DGKD;DGKK;DGKZ	ionotropic glutamate receptor complex (GO:0008328)	2/40	0.769999	1	0.729395	0.190639	DLG3;SCRIB			G-protein beta/gamma-subunit complex binding (GO:0031683)	2/17	0.326868	1	1.71622	1.91908	GNA13;GNAI2
semaphorin-plexin signaling pathway involved in neuron projection guidance (GO:1902285)	4/13	0.0095264	0.212285	4.48858	20.8885	NRP1;PLXND1;PLXNB2;SEMA3F	anaphase-promoting complex (GO:0005680)	1/21	0.775086	1	0.694662	0.176987	CDC20			bile acid:sodium symporter activity (GO:0008508)	1/6	0.346969	1	2.43132	2.57359	SLC10A4
chondroitin sulfate catabolic process (GO:0030207)	4/13	0.0095264	0.211362	4.48858	20.8885	HYAL1;BGN;IDS;DCN	pigment granule (GO:0048770)	1/21	0.775086	1	0.694662	0.176987	MYO5A			vascular endothelial growth factor receptor 2 binding (GO:0043184)	1/6	0.346969	1	2.43132	2.57359	ITGA5
positive regulation of gene silencing by miRNA (GO:2000637)	5/20	0.00978496	0.216159	3.64697	16.8742	ZFP36;TGFB1;STAT3;PUM1;EGFR	melanosome (GO:0042470)	1/21	0.775086	1	0.694662	0.176987	MYO5A			protein phosphatase 2B binding (GO:0030346)	1/6	0.346969	1	2.43132	2.57359	SLC9A1
embryonic digestive tract development (GO:0048566)	5/20	0.00978496	0.215227	3.64697	16.8742	NIPBL;ID2;SOX11;GLI3;GLI2	euchromatin (GO:0000791)	1/21	0.775086	1	0.694662	0.176987	UHRF1			MHC class II protein binding (GO:0042289)	1/6	0.346969	1	2.43132	2.57359	CD74
positive regulation of RNA metabolic process (GO:0051254)	7/36	0.0100964	0.221125	2.83653	13.0355	TGFB1;POLR2A;PIK3R1;RELA;EGFR;NFKB1;HSPA1A	centrosome (GO:0005813)	28/462	0.778389	1	0.884115	0.221496	ITSN2;CLIC4;NUMA1;DCTN4;SLC1A4;CHD4;BRCA2;BICD2;CDC14B;GNAI2;RNF19A;CEP170;CTSC;DYNC1H1;PPP1R12A;IFT140;TBCD;SCLT1;SKI;CYLD;DYNC1LI2;KAT2A;NIN;AKAP9;MCM3;MAPRE1;MAP3K11;HSPA1A			clathrin light chain binding (GO:0032051)	1/6	0.346969	1	2.43132	2.57359	HIP1
membrane protein proteolysis (GO:0033619)	7/36	0.0100964	0.22018	2.83653	13.0355	NCSTN;NAPSA;TGFB1;MYH9;SPPL3;RELA;NFKB1	anchored component of plasma membrane (GO:0046658)	2/41	0.781789	1	0.711604	0.175176	CD14;EFNA5			beta-galactosidase activity (GO:0004565)	1/6	0.346969	1	2.43132	2.57359	PSAP
sulfur compound catabolic process (GO:0044273)	7/36	0.0100964	0.219243	2.83653	13.0355	GALNS;HYAL1;BGN;IDS;PRELP;GNS;DCN	peroxisomal membrane (GO:0005778)	2/41	0.781789	1	0.711604	0.175176	ABCD3;RAB8B			nerve growth factor binding (GO:0048406)	1/6	0.346969	1	2.43132	2.57359	FURIN
lipid phosphorylation (GO:0046834)	7/36	0.0100964	0.218314	2.83653	13.0355	PI4K2B;DGKD;PI4KA;PIK3CD;PIK3R1;DGKZ;PIK3CG	telomerase holoenzyme complex (GO:0005697)	1/22	0.79052	1	0.663086	0.155868	SMG7			leukotriene receptor activity (GO:0004974)	1/6	0.346969	1	2.43132	2.57359	CYSLTR1
endothelial cell migration (GO:0043542)	7/36	0.0100964	0.217393	2.83653	13.0355	NRP1;PLXND1;SOX18;NOS3;MYH9;PRKX;SCG2	histone acetyltransferase complex (GO:0000123)	1/22	0.79052	1	0.663086	0.155868	OGT			protein-lysine 6-oxidase activity (GO:0004720)	1/6	0.346969	1	2.43132	2.57359	LOX
modulation by host of viral transcription (GO:0043921)	6/28	0.0104706	0.224503	3.12598	14.2519	CCNT1;CCL4;CCL3;EP300;CHD1;SMARCA4	cytoplasmic stress granule (GO:0010494)	2/42	0.793044	1	0.694662	0.161075	ZFP36;PUM1			Y-form DNA binding (GO:0000403)	1/6	0.346969	1	2.43132	2.57359	BLM
regulation of angiogenesis (GO:0045765)	21/178	0.0105037	0.22427	1.72104	7.84112	BTG1;PLXND1;PRKCB;PDPK1;NOS3;GAB1;THBS2;SULF1;KLF4;HSPG2;DCN;FAM129B;CDH5;SPRED1;TMEM2;COL4A2;HGS;HYAL1;IL1B;CHI3L1;AGGF1	microtubule cytoskeleton (GO:0015630)	23/389	0.798548	1	0.862523	0.194034	SPAG9;SPECC1;MACF1;DYNC1H1;CLIC4;NUMA1;TBCD;NEDD9;SLC1A4;NAV1;IQGAP1;KCNAB2;EML4;CDC20;CYLD;TTLL3;PITPNM1;INCENP;DPYSL2;ARHGEF2;MAPRE1;MAP3K11;RAB11FIP5			NEDD8 transferase activity (GO:0019788)	1/6	0.346969	1	2.43132	2.57359	MDM2
negative regulation of cellular response to transforming growth factor beta stimulus (GO:1903845)	9/54	0.0105365	0.224032	2.43132	11.0696	SKI;TGFB1;PDPK1;TGFB1I1;SKIL;TGFBR1;TGFBR2;BCL9L;HSPA1A	spliceosomal complex (GO:0005681)	6/115	0.808349	1	0.761107	0.161935	SF3B4;MAPKBP1;UPF1;DHX38;ADAR;RBM5			cAMP-dependent protein kinase activity (GO:0004691)	1/6	0.346969	1	2.43132	2.57359	PRKX
positive regulation of cytokine secretion (GO:0050715)	11/74	0.0117006	0.247752	2.16847	9.64561	C1QTNF3;CSF1R;CD274;FZD5;F2R;SAA1;MBP;CD14;ORM2;HAVCR2;TLR2	chromosome (GO:0005694)	5/98	0.810189	1	0.74428	0.156662	BLM;SETD2;NIPBL;PBRM1;SMC1A			cysteinyl leukotriene receptor activity (GO:0001631)	1/6	0.346969	1	2.43132	2.57359	CYSLTR1
regulation of macrophage activation (GO:0043030)	5/21	0.0121317	0.255819	3.47331	15.324	CD74;TNIP2;TLR6;FCGR2B;TLR4	cell cortex part (GO:0044448)	2/45	0.823785	1	0.648351	0.12568	NUMA1;ENO1			cytochrome-b5 reductase activity, acting on NAD(P)H (GO:0004128)	1/6	0.346969	1	2.43132	2.57359	CYB5R3
ventricular septum morphogenesis (GO:0060412)	5/21	0.0121317	0.254766	3.47331	15.324	NOTCH1;SOX11;TGFBR1;SOX4;TGFBR2	polysome (GO:0005844)	3/64	0.823809	1	0.683807	0.132533	IMPACT;EIF4H;VIM			JUN kinase binding (GO:0008432)	1/6	0.346969	1	2.43132	2.57359	SPAG9
positive regulation of leukocyte cell-cell adhesion (GO:1903039)	5/21	0.0121317	0.253722	3.47331	15.324	SIRPA;CCL2;CD47;SIRPB1;CD44	endoplasmic reticulum exit site (GO:0070971)	1/25	0.830757	1	0.583516	0.108195	SEC16A			C3HC4-type RING finger domain binding (GO:0055131)	1/6	0.346969	1	2.43132	2.57359	HSPA1A
regulation of NIK/NF-kappaB signaling (GO:1901222)	6/29	0.0124537	0.259393	3.01818	13.237	APP;PDCD4;CD14;ACTN4;RELA;EGFR	intermediate filament (GO:0005882)	2/47	0.841934	1	0.620761	0.106805	SLC1A4;VIM			ADP-ribosylation factor binding (GO:0030306)	1/6	0.346969	1	2.43132	2.57359	SORL1
carboxylic acid catabolic process (GO:0046395)	6/29	0.0124537	0.258338	3.01818	13.237	TMEM2;TGFB1;NAGK;HYAL1;CD44;SLC9A1	U4/U6 x U5 tri-snRNP complex (GO:0046540)	1/26	0.842373	1	0.561073	0.0962424	PRPF8			clathrin heavy chain binding (GO:0032050)	1/6	0.346969	1	2.43132	2.57359	CLTA
positive regulation of endocytosis (GO:0045807)	10/65	0.0125713	0.259722	2.24429	9.82178	CD63;DAB2;HIP1;SLC11A1;IL1B;ANKFY1;SIRPA;FCGR2B;B2M;SIRPB1	condensed chromosome, centromeric region (GO:0000779)	1/27	0.853192	1	0.540292	0.0857826	AHCTF1			manganese ion transmembrane transporter activity (GO:0005384)	1/6	0.346969	1	2.43132	2.57359	SLC11A1
positive regulation of cell adhesion (GO:0045785)	10/65	0.0125713	0.258675	2.24429	9.82178	CXCL12;HYAL1;SAA1;SIRPA;ADAM8;NCKAP1L;CD47;SIRPB1;PPM1F;TGM2	contractile fiber (GO:0043292)	1/27	0.853192	1	0.540292	0.0857826	PPP1R12A			1-phosphatidylinositol-4-phosphate 5-kinase activity (GO:0016308)	1/6	0.346969	1	2.43132	2.57359	PIP5K1C
cellular response to osmotic stress (GO:0071470)	4/14	0.0126239	0.258714	4.16797	18.223	ARHGEF2;PKD2;YBX3;ZFP36L1	U12-type spliceosomal complex (GO:0005689)	1/28	0.863269	1	0.520996	0.0766014	SF3B4			phospholipid scramblase activity (GO:0017128)	1/6	0.346969	1	2.43132	2.57359	PLSCR1
regulation of adaptive immune response (GO:0002819)	4/14	0.0126239	0.257679	4.16797	18.223	IRF1;FADD;FCGR2B;SAMSN1	spindle microtubule (GO:0005876)	2/50	0.865988	1	0.583516	0.0839587	NUMA1;TBL1XR1			1-phosphatidylinositol-3-kinase regulator activity (GO:0046935)	1/6	0.346969	1	2.43132	2.57359	PIK3R1
axon guidance (GO:0007411)	19/159	0.0127176	0.258557	1.74321	7.6087	NRP1;LYPLA2;PLXND1;SHC1;PTPRO;GAB1;PIK3CD;PIK3R1;SEMA3F;EFNA5;GLI2;ROBO1;FAM129B;CXCL12;NFIB;PLXNB2;NCAM1;EPHB2;PDLIM7	spindle pole (GO:0000922)	5/108	0.870493	1	0.675365	0.09367	MAPKBP1;NIN;NUMA1;SMC1A;CDC14B			arginine binding (GO:0034618)	1/6	0.346969	1	2.43132	2.57359	NOS3
activation of GTPase activity (GO:0090630)	12/85	0.0129122	0.261471	2.05947	8.95783	USP6NL;SYDE1;TIAM1;TBC1D1;TBC1D2;TBC1D9B;TBC1D5;RHOG;TBC1D9;SCRIB;TAX1BP3;RANGAP1	nuclear speck (GO:0016607)	16/297	0.871933	1	0.78588	0.107699	DDX17;BRD2;ELL;SETD1A;CXXC1;PUM1;DGKZ;CYGB;NFATC4;DUSP11;ADAMTS4;NFKBIZ;EP400;AGGF1;RREB1;HSPA1A			peroxisome proliferator activated receptor binding (GO:0042975)	1/6	0.346969	1	2.43132	2.57359	HMGA1
positive regulation of GTPase activity (GO:0043547)	22/193	0.0131133	0.264494	1.66287	7.20709	USP6NL;RALBP1;TBC1D9B;F2R;RHOG;TBC1D9;SCRIB;RANGAP1;CX3CL1;TIAM1;SYDE1;TBC1D1;SNX18;TBC1D2;CCL7;RGS1;TBC1D5;CCL4;CCL3;CCL2;TAX1BP3;AGRN	rough endoplasmic reticulum (GO:0005791)	1/29	0.872655	1	0.503031	0.0685203	SPPL3			uridylyltransferase activity (GO:0070569)	1/6	0.346969	1	2.43132	2.57359	ZCCHC6
negative regulation of transforming growth factor beta receptor signaling pathway (GO:0030512)	9/56	0.0132878	0.266959	2.34448	10.1303	SKI;TGFB1;PDPK1;TGFB1I1;SKIL;TGFBR1;TGFBR2;BCL9L;HSPA1A	Golgi cis cisterna (GO:0000137)	1/29	0.872655	1	0.503031	0.0685203	LLGL1			interleukin-1 binding (GO:0019966)	1/6	0.346969	1	2.43132	2.57359	IL1RN
negative regulation of cellular response to growth factor stimulus (GO:0090288)	9/56	0.0132878	0.265912	2.34448	10.1303	SKI;NOTCH1;HGS;MMRN2;ADAMTS12;SULF1;NBL1;SKIL;FAM129B	Cul3-RING ubiquitin ligase complex (GO:0031463)	3/71	0.873259	1	0.61639	0.0835349	KCTD10;TNFAIP1;BACH1			DNA insertion or deletion binding (GO:0032135)	1/6	0.346969	1	2.43132	2.57359	MSH6
positive regulation of smooth muscle cell proliferation (GO:0048661)	7/38	0.0135537	0.270174	2.68724	11.5581	PDGFRB;EDN1;MMP2;ID2;AIF1;MMP9;FOXP1	intercalated disc (GO:0014704)	1/32	0.897123	1	0.455872	0.0494904	GJA1			hydrolase activity, acting on carbon-nitrogen (but not peptide) bonds, in cyclic amides (GO:0016812)	1/6	0.346969	1	2.43132	2.57359	DPYSL2
cartilage development (GO:0051216)	8/47	0.0136979	0.271987	2.48305	10.6535	TGFB1;HYAL1;NFIB;CREB3L2;CHI3L1;SULF1;PKD1;CD44	vesicle coat (GO:0030120)	1/32	0.897123	1	0.455872	0.0494904	CLTA			aspartic endopeptidase activity, intramembrane cleaving (GO:0042500)	1/6	0.346969	1	2.43132	2.57359	SPPL3
regulation of G1/S transition of mitotic cell cycle (GO:2000045)	8/47	0.0136979	0.270933	2.48305	10.6535	CDKN1A;CCND2;HYAL1;ID2;INO80;PKD2;KLF4;AIF1	spliceosomal tri-snRNP complex (GO:0097526)	1/32	0.897123	1	0.455872	0.0494904	PRPF8			ubiquitin-protein transferase inhibitor activity (GO:0055105)	1/6	0.346969	1	2.43132	2.57359	RPL23
heterochromatin assembly (GO:0031507)	3/8	0.013861	0.273099	5.47046	23.4063	HMGA1;TNRC18;BAHCC1	centriole (GO:0005814)	4/96	0.902328	1	0.607829	0.0624709	NIN;SCLT1;CEP170;HSPA1A			mRNA binding (GO:0003729)	14/180	0.351701	1	1.13461	1.18564	EIF4A1;IREB2;SAMD4B;UPF3A;THOC2;PUM1;YBX3;HNRNPAB;RNF40;ZFP36L1;ZFP36;IGF2BP2;DCP1A;RBM5
ventricular trabecula myocardium morphogenesis (GO:0003222)	3/8	0.013861	0.272049	5.47046	23.4063	NOTCH1;TGFBR1;ENG	precatalytic spliceosome (GO:0071011)	1/34	0.910765	1	0.429056	0.0401039	MAPKBP1			amino acid transmembrane transporter activity (GO:0015171)	5/57	0.352284	1	1.27964	1.33507	SLC6A6;SLC7A8;SLC1A4;SLC7A11;SLC38A2
peptidyl-lysine acetylation (GO:0018394)	3/8	0.013861	0.271006	5.47046	23.4063	CREBBP;KAT2A;EP300	Cajal body (GO:0015030)	1/35	0.916893	1	0.416797	0.0361634	ELL			nuclear hormone receptor binding (GO:0035257)	5/57	0.352284	1	1.27964	1.33507	MED12;HMGA1;EP300;ACTN4;GAS2L1
nose development (GO:0043584)	3/8	0.013861	0.269972	5.47046	23.4063	SKI;CHD7;GLI3	small-subunit processome (GO:0032040)	1/36	0.922599	1	0.405219	0.0326445	NOL6			hyaluronic acid binding (GO:0005540)	2/18	0.352526	1	1.62088	1.68998	TMEM2;CD44
regulation of receptor binding (GO:1900120)	3/8	0.013861	0.268945	5.47046	23.4063	ADAM15;B2M;MMP9	spliceosomal snRNP complex (GO:0097525)	2/60	0.923875	1	0.486263	0.0385016	MAPKBP1;PRPF8			semaphorin receptor binding (GO:0030215)	2/18	0.352526	1	1.62088	1.68998	SEMA4A;SEMA3F
regulation of apoptotic cell clearance (GO:2000425)	3/8	0.013861	0.267927	5.47046	23.4063	C3;CCL2;CD300LF	U2-type spliceosomal complex (GO:0005684)	2/61	0.928142	1	0.478292	0.0356665	AQR;PRPF8			protein serine/threonine kinase inhibitor activity (GO:0030291)	3/31	0.358251	1	1.41173	1.44917	CDKN1A;SPRED1;PRKAR1A
positive regulation of alpha-beta T cell differentiation (GO:0046638)	3/8	0.013861	0.266916	5.47046	23.4063	NCKAP1L;GLI3;TGFBR2	cullin-RING ubiquitin ligase complex (GO:0031461)	8/182	0.936898	1	0.641226	0.0417955	CDC20;FBXL20;SPSB1;KCTD10;BTBD3;ZSWIM6;TNFAIP1;BACH1			transcription regulatory region sequence-specific DNA binding (GO:0000976)	22/293	0.360034	1	1.09534	1.11895	CREBBP;ZFHX3;CEBPB;UHRF1;HMGA1;SOX11;ENO1;ACTN4;KLF4;PBX1;GLI3;RELA;NFKB1;FOSL2;TRPS1;CREB3L2;E2F2;TNRC18;HOXD4;RREB1;BAHCC1;SOX4
nuclear-transcribed mRNA catabolic process, deadenylation-independent decay (GO:0031086)	3/8	0.013861	0.265912	5.47046	23.4063	ZFP36;DCP1A;ZFP36L1	nucleolus (GO:0005730)	37/677	0.941231	1	0.79727	0.0482881	DDX3Y;CSTB;CDKN1A;BLM;DOCK4;CHD7;CDCA8;DDX21;ADAR;TNFAIP1;LDB2;GLI2;CDC14B;NOL6;PTBP1;GOLGA3;RNF213;CCND2;XPO6;SNAPC3;PCDH1;PHLDA1;BCL9L;DDX17;SUZ12;RPL23;DDX54;UPF3A;SMARCA4;PLSCR1;ZEB2;KLF6;NIN;PLEKHM1;MDM2;ATM;BRWD1			phosphatidylinositol-3-phosphate binding (GO:0032266)	3/32	0.37737	1	1.36761	1.33278	HIP1;NCF4;SH3PXD2B
cellular response to reactive oxygen species (GO:0034614)	10/66	0.0139331	0.266294	2.21029	9.44564	IMPACT;PLEKHA1;MMP3;PTPRK;PKD2;MMP9;RELA;EGFR;FOXO1;CAMKK2	lipid droplet (GO:0005811)	2/65	0.94305	1	0.448858	0.0263193	CYB5R3;ANXA2			gamma-tubulin binding (GO:0043015)	2/19	0.377832	1	1.53557	1.49458	BRCA2;RAB11FIP5
negative regulation of cell adhesion (GO:0007162)	10/66	0.0139331	0.2653	2.21029	9.44564	NOTCH1;TGFB1;PLXND1;RASA1;PTPRO;GCNT2;TBCD;PLXNB2;TGFBI;KNG1	integral component of Golgi membrane (GO:0030173)	1/41	0.94577	1	0.355802	0.0198382	CSGALNACT1			cadherin binding involved in cell-cell adhesion (GO:0098641)	2/19	0.377832	1	1.53557	1.49458	ANXA2;S100A11
positive regulation of cellular component organization (GO:0051130)	14/107	0.0144905	0.274888	1.9087	8.08192	CD63;TGFB1;GBA;IL1RAP;TGFBR1;IGF1R;CDC20;DAB2;SRPX2;HYAL1;DLG5;PLEKHM2;ATM;EPHB2	nuclear ubiquitin ligase complex (GO:0000152)	1/42	0.949495	1	0.347331	0.0180006	CDC20			neuropilin binding (GO:0038191)	2/19	0.377832	1	1.53557	1.49458	SEMA4A;SEMA3F
positive regulation of interleukin-1 secretion (GO:0050716)	6/30	0.0146861	0.277568	2.91758	12.3147	P2RX7;FZD5;CCL3;SAA1;ORM2;TLR4	microbody lumen (GO:0031907)	1/43	0.952964	1	0.339253	0.0163446	ABCD3			dynein complex binding (GO:0070840)	2/19	0.377832	1	1.53557	1.49458	NUMA1;BICD2
[truncated: 3,341 more rows]

## Sheet: Week 9 Up
BP GO Term	Overlap	P-value	Adjusted P-value	Odds Ratio	Combined Score	Genes	CC GO Term	Overlap	P-value	Adjusted P-value	Odds Ratio	Combined Score	Genes		MF GO Term	Overlap	P-value	Adjusted P-value	Odds Ratio	Combined Score	Genes
[truncated: 3,890 more rows]

[truncated: 26 more sheets: Week 12 Up, Week 15 Up, Week 18 Up, Week 21 Up, Week 24 Up, Week 27 Up, Week 30 Up, Week 33 Up, Week 37 Up, Week 41 Up, Week 46 Up, Sheet1, Week 2 Down, Week 6 Down, Week 9 Down, Week 12 Down, Week 15 Down, Week 18 Down, Week 21 Down, Week 24 Down …]
