# Supplementary material for: Gene expression in mouse muscle over time after nickel pellet implantation
Source: Royal Society of Chemistry journal article supplement (doi:10.1039/c9mt00289h), 2020-02-12
Supplement: c9mt00289h4.pdf [file c9mt00289h4.pdf]

Oneway Analysis of Ni Kidney By Week

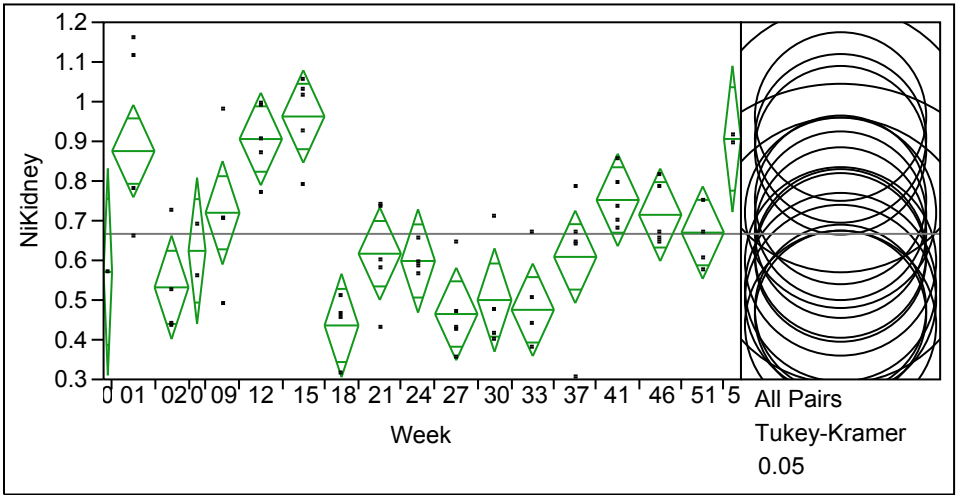

Missing Rows  
1

Oneway Anova  
Summary of Fit

|                            |          |
|----------------------------|----------|
| Rsquare                    | 0.669867 |
| Adj Rsquare                | 0.571406 |
| Root Mean Square Error     | 0.130163 |
| Mean of Response           | 0.6668   |
| Observations (or Sum Wgts) | 75       |

Analysis of Variance

| Source   | DF | Sum of Squares | Mean Square | F Ratio | Prob > F |
|----------|----|----------------|-------------|---------|----------|
| Week     | 17 | 1.9595126      | 0.115265    | 6.8034  | <.0001*  |
| Error    | 57 | 0.9657154      | 0.016942    |         |          |
| C. Total | 74 | 2.9252280      |             |         |          |

Means for Oneway Anova

| Level | Number | Mean     | Std Error | Lower 95% | Upper 95% |
|-------|--------|----------|-----------|-----------|-----------|
| 00    | 1      | 0.571000 | 0.13016   | 0.31035   | 0.8316    |
| 01    | 5      | 0.875400 | 0.05821   | 0.75884   | 0.9920    |
| 02    | 4      | 0.532000 | 0.06508   | 0.40168   | 0.6623    |

| Level | Number | Mean     | Std Error | Lower 95% | Upper 95% |
|-------|--------|----------|-----------|-----------|-----------|
| 06    | 2      | 0.624000 | 0.09204   | 0.43969   | 0.8083    |
| 09    | 4      | 0.720000 | 0.06508   | 0.58968   | 0.8503    |
| 12    | 5      | 0.905800 | 0.05821   | 0.78924   | 1.0224    |
| 15    | 5      | 0.962600 | 0.05821   | 0.84604   | 1.0792    |
| 18    | 4      | 0.436000 | 0.06508   | 0.30568   | 0.5663    |
| 21    | 5      | 0.616800 | 0.05821   | 0.50024   | 0.7334    |
| 24    | 4      | 0.598500 | 0.06508   | 0.46818   | 0.7288    |
| 27    | 5      | 0.464800 | 0.05821   | 0.34824   | 0.5814    |
| 30    | 4      | 0.500000 | 0.06508   | 0.36968   | 0.6303    |
| 33    | 5      | 0.475400 | 0.05821   | 0.35884   | 0.5920    |
| 37    | 5      | 0.608800 | 0.05821   | 0.49224   | 0.7254    |
| 41    | 5      | 0.752200 | 0.05821   | 0.63564   | 0.8688    |
| 46    | 5      | 0.714800 | 0.05821   | 0.59824   | 0.8314    |
| 51    | 5      | 0.670000 | 0.05821   | 0.55344   | 0.7866    |
| 53    | 2      | 0.906000 | 0.09204   | 0.72169   | 1.0903    |

Std Error uses a pooled estimate of error variance

## Means Comparisons

### Comparisons for all pairs using Tukey-Kramer HSD

| Dif=Me  | 15       | 53       | 12       | 01       | 41       | 09       | 46       | 51       | 06       | 21       | 37       | 24       | 00       | 02       | 30       | 33       |
|---------|----------|----------|----------|----------|----------|----------|----------|----------|----------|----------|----------|----------|----------|----------|----------|----------|
| an[i]-  |          |          |          |          |          |          |          |          |          |          |          |          |          |          |          |          |
| Mean[j] |          |          |          |          |          |          |          |          |          |          |          |          |          |          |          |          |
| ]       |          |          |          |          |          |          |          |          |          |          |          |          |          |          |          |          |
| 15      | 0.00000  | 0.05660  | 0.05680  | 0.08720  | 0.21040  | 0.24260  | 0.24780  | 0.29260  | 0.33860  | 0.34580  | 0.35380  | 0.36410  | 0.39160  | 0.43060  | 0.46260  | 0.48720  |
| 53      | -0.05660 | 0.00000  | 0.00020  | 0.03060  | 0.15380  | 0.18600  | 0.19120  | 0.23600  | 0.28200  | 0.28920  | 0.29720  | 0.30750  | 0.33500  | 0.37400  | 0.40600  | 0.43060  |
| 12      | -0.05680 | -0.00020 | 0.00000  | 0.03040  | 0.15360  | 0.18580  | 0.19100  | 0.23580  | 0.28180  | 0.28900  | 0.29700  | 0.30730  | 0.33480  | 0.37380  | 0.40580  | 0.43040  |
| 01      | -0.08720 | -0.03060 | -0.03040 | 0.00000  | 0.12320  | 0.15540  | 0.16060  | 0.20540  | 0.25140  | 0.25860  | 0.26660  | 0.27690  | 0.30440  | 0.34340  | 0.37540  | 0.40000  |
| 41      | -0.21040 | -0.15380 | -0.15360 | -0.12320 | 0.00000  | 0.03220  | 0.03740  | 0.08220  | 0.12820  | 0.13540  | 0.14340  | 0.15370  | 0.18120  | 0.22020  | 0.25220  | 0.27680  |
| 09      | -0.24260 | -0.18600 | -0.18580 | -0.15540 | -0.03220 | 0.00000  | 0.00520  | 0.05000  | 0.09600  | 0.10320  | 0.11120  | 0.12150  | 0.14900  | 0.18800  | 0.22000  | 0.24460  |
| 46      | -0.24780 | -0.19120 | -0.19100 | -0.16060 | -0.03740 | -0.00520 | 0.00000  | 0.04480  | 0.09080  | 0.09800  | 0.10600  | 0.11630  | 0.14380  | 0.18280  | 0.21480  | 0.23940  |
| 51      | -0.29260 | -0.23600 | -0.23580 | -0.20540 | -0.08220 | -0.05000 | -0.04480 | 0.00000  | 0.04600  | 0.05320  | 0.06120  | 0.07150  | 0.09900  | 0.13800  | 0.17000  | 0.19460  |
| 06      | -0.33860 | -0.28200 | -0.28180 | -0.25140 | -0.12820 | -0.09600 | -0.09080 | -0.04600 | 0.00000  | 0.00720  | 0.01520  | 0.02550  | 0.05300  | 0.09200  | 0.12400  | 0.14860  |
| 21      | -0.34580 | -0.28920 | -0.28900 | -0.25860 | -0.13540 | -0.10320 | -0.09800 | -0.05320 | -0.00720 | 0.00000  | 0.00800  | 0.01830  | 0.04580  | 0.08480  | 0.11680  | 0.14140  |
| 37      | -0.35380 | -0.29720 | -0.29700 | -0.26660 | -0.14340 | -0.11120 | -0.10600 | -0.06120 | -0.01520 | -0.00800 | 0.00000  | 0.01030  | 0.03780  | 0.07680  | 0.10880  | 0.13340  |
| 24      | -0.36410 | -0.30750 | -0.30730 | -0.27690 | -0.15370 | -0.12150 | -0.11630 | -0.07150 | -0.02550 | -0.01830 | -0.01030 | 0.00000  | 0.02750  | 0.06650  | 0.09850  | 0.12310  |
| 00      | -0.39160 | -0.33500 | -0.33480 | -0.30440 | -0.18120 | -0.14900 | -0.14380 | -0.09900 | -0.05300 | -0.04580 | -0.03780 | -0.02750 | 0.00000  | 0.03900  | 0.07100  | 0.09560  |
| 02      | -0.43060 | -0.37400 | -0.37380 | -0.34340 | -0.22020 | -0.18800 | -0.18280 | -0.13800 | -0.09200 | -0.08480 | -0.07680 | -0.06650 | -0.03900 | 0.00000  | 0.03200  | 0.05660  |
| 30      | -0.46260 | -0.40600 | -0.40580 | -0.37540 | -0.25220 | -0.22000 | -0.21480 | -0.17000 | -0.12400 | -0.11680 | -0.10880 | -0.09850 | -0.07100 | -0.03200 | 0.00000  | 0.02460  |
| 33      | -0.48720 | -0.43060 | -0.43040 | -0.40000 | -0.27680 | -0.24460 | -0.23940 | -0.19460 | -0.14860 | -0.14140 | -0.13340 | -0.12310 | -0.09560 | -0.05660 | -0.02460 | 0.00000  |
| 27      | -0.49780 | -0.44120 | -0.44100 | -0.41060 | -0.28740 | -0.25520 | -0.25000 | -0.20520 | -0.15920 | -0.15200 | -0.14400 | -0.13370 | -0.10620 | -0.06720 | -0.03520 | -0.01060 |
| 18      | -0.52660 | -0.47000 | -0.46980 | -0.43940 | -0.31620 | -0.28400 | -0.27880 | -0.23400 | -0.18800 | -0.18080 | -0.17280 | -0.16250 | -0.13500 | -0.09600 | -0.06400 | -0.03940 |

| Level |   |   |   |   | Mean       |
|-------|---|---|---|---|------------|
| 15    | A |   |   |   | 0.96260000 |
| 53    | A | B | C |   | 0.90600000 |
| 12    | A | B |   |   | 0.90580000 |
| 01    | A | B |   |   | 0.87540000 |
| 41    | A | B | C | D | 0.75220000 |
| 09    | A | B | C | D | 0.72000000 |
| 46    | A | B | C | D | 0.71480000 |
| 51    | A | B | C | D | 0.67000000 |
| 06    | A | B | C | D | 0.62400000 |
| 21    |   | B | C | D | 0.61680000 |
| 37    |   | B | C | D | 0.60880000 |
| 24    |   | B | C | D | 0.59850000 |
| 00    | A | B | C | D | 0.57100000 |
| 02    |   |   | C | D | 0.53200000 |
| 30    |   |   | C | D | 0.50000000 |
| 33    |   |   |   | D | 0.47540000 |
| 27    |   |   |   | D | 0.46480000 |
| 18    |   |   |   | D | 0.43600000 |

Levels not connected by same letter are significantly different.
