# Supplementary material for: Gene expression in mouse muscle over time after nickel pellet implantation
Source: Royal Society of Chemistry journal article supplement (doi:10.1039/c9mt00289h), 2020-02-12
Supplement: c9mt00289h5.pdf [file c9mt00289h5.pdf]

### Oneway Analysis of Serum Ni By Week

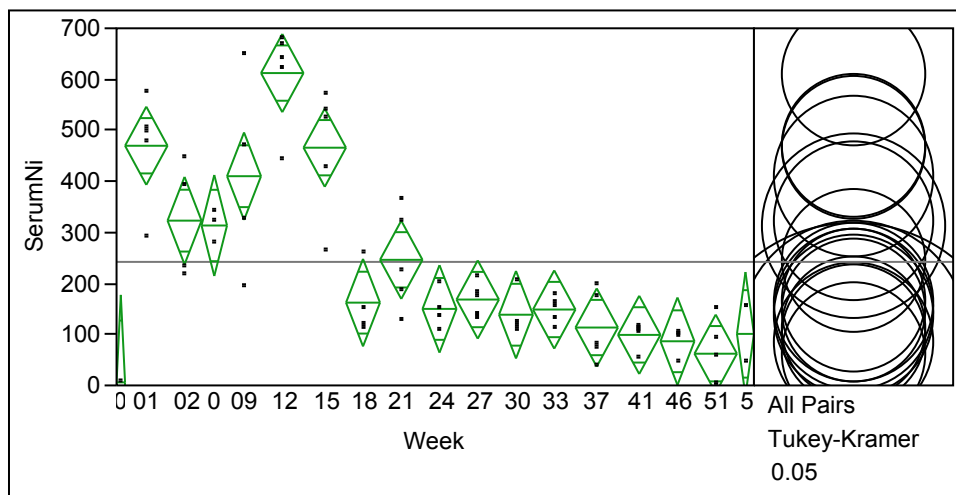

Missing Rows

1

### Oneway Anova Summary of Fit

|                            |          |
|----------------------------|----------|
| Rsquare                    | 0.831512 |
| Adj Rsquare                | 0.781261 |
| Root Mean Square Error     | 85.60656 |
| Mean of Response           | 242.132  |
| Observations (or Sum Wgts) | 75       |

### Analysis of Variance

| Source   | DF | Sum of Squares | Mean Square | F Ratio | Prob > F |
|----------|----|----------------|-------------|---------|----------|
| Week     | 17 | 2061522.9      | 121266      | 16.5472 | <.0001*  |
| Error    | 57 | 417723.5       | 7328        |         |          |
| C. Total | 74 | 2479246.4      |             |         |          |

### Means for Oneway Anova

| Level | Number | Mean    | Std Error | Lower 95% | Upper 95% |
|-------|--------|---------|-----------|-----------|-----------|
| 00    | 1      | 6.000   | 85.607    | -165.4    | 177.42    |
| 01    | 5      | 469.760 | 38.284    | 393.1     | 546.42    |
| 02    | 4      | 323.000 | 42.803    | 237.3     | 408.71    |

| Level | Number | Mean    | Std Error | Lower 95% | Upper 95% |
|-------|--------|---------|-----------|-----------|-----------|
| 06    | 3      | 313.467 | 49.425    | 214.5     | 412.44    |
| 09    | 4      | 410.100 | 42.803    | 324.4     | 495.81    |
| 12    | 5      | 612.240 | 38.284    | 535.6     | 688.90    |
| 15    | 5      | 465.960 | 38.284    | 389.3     | 542.62    |
| 18    | 4      | 162.275 | 42.803    | 76.6      | 247.99    |
| 21    | 5      | 246.180 | 38.284    | 169.5     | 322.84    |
| 24    | 4      | 150.000 | 42.803    | 64.3      | 235.71    |
| 27    | 5      | 168.320 | 38.284    | 91.7      | 244.98    |
| 30    | 4      | 138.600 | 42.803    | 52.9      | 224.31    |
| 33    | 5      | 148.760 | 38.284    | 72.1      | 225.42    |
| 37    | 5      | 113.460 | 38.284    | 36.8      | 190.12    |
| 41    | 5      | 99.040  | 38.284    | 22.4      | 175.70    |
| 46    | 4      | 86.550  | 42.803    | 0.83791   | 172.26    |
| 51    | 5      | 62.160  | 38.284    | -14.5     | 138.82    |
| 53    | 2      | 101.000 | 60.533    | -20.2     | 222.22    |

Std Error uses a pooled estimate of error variance

### Means Comparisons Comparisons for all pairs using Tukey-Kramer HSD

| Dif=Mea<br> -Mean[j] | 12      | 01      | 15      | 09      | 02      | 06      | 21      | 27      | 18      | 24      | 33      | 30      | 37      | 53     | 41     | 46     | 51     | 00     |
|----------------------|---------|---------|---------|---------|---------|---------|---------|---------|---------|---------|---------|---------|---------|--------|--------|--------|--------|--------|
| 12                   | 0.00    | 142.48  | 146.28  | 202.14  | 289.24  | 298.77  | 366.06  | 443.92  | 449.97  | 462.24  | 463.48  | 473.64  | 498.78  | 511.24 | 513.20 | 525.69 | 550.08 | 606.24 |
| 01                   | -142.48 | 0.00    | 3.80    | 59.66   | 146.76  | 156.29  | 223.58  | 301.44  | 307.49  | 319.76  | 321.00  | 331.16  | 356.30  | 368.76 | 370.72 | 383.21 | 407.60 | 463.76 |
| 15                   | -146.28 | -3.80   | 0.00    | 55.86   | 142.96  | 152.49  | 219.78  | 297.64  | 303.68  | 315.96  | 317.20  | 327.36  | 352.50  | 364.96 | 366.92 | 379.41 | 403.80 | 459.96 |
| 09                   | -202.14 | -59.66  | -55.86  | 0.00    | 87.10   | 96.63   | 163.92  | 241.78  | 247.83  | 260.10  | 261.34  | 271.50  | 296.64  | 309.10 | 311.06 | 323.55 | 347.94 | 404.10 |
| 02                   | -289.24 | -146.76 | -142.96 | -87.10  | 0.00    | 9.53    | 76.82   | 154.68  | 160.73  | 173.00  | 174.24  | 184.40  | 209.54  | 222.00 | 223.96 | 236.45 | 260.84 | 317.00 |
| 06                   | -298.77 | -156.29 | -152.49 | -96.63  | -9.53   | 0.00    | 67.29   | 145.15  | 151.19  | 163.47  | 164.71  | 174.87  | 200.01  | 212.47 | 214.43 | 226.92 | 251.31 | 307.47 |
| 21                   | -366.06 | -223.58 | -219.78 | -163.92 | -76.82  | -67.29  | 0.00    | 77.86   | 83.91   | 96.18   | 97.42   | 107.58  | 132.72  | 145.18 | 147.14 | 159.63 | 184.02 | 240.18 |
| 27                   | -443.92 | -301.44 | -297.64 | -241.78 | -154.68 | -145.15 | -77.86  | 0.00    | 6.04    | 18.32   | 19.56   | 29.72   | 54.86   | 67.32  | 69.28  | 81.77  | 106.16 | 162.32 |
| 18                   | -449.97 | -307.49 | -303.68 | -247.83 | -160.73 | -151.19 | -83.91  | -6.04   | 0.00    | 12.28   | 13.52   | 23.68   | 48.82   | 61.28  | 63.24  | 75.73  | 100.12 | 156.28 |
| 24                   | -462.24 | -319.76 | -315.96 | -260.10 | -173.00 | -163.47 | -96.18  | -18.32  | -12.28  | 0.00    | 1.24    | 11.40   | 36.54   | 49.00  | 50.96  | 63.45  | 87.84  | 144.00 |
| 33                   | -463.48 | -321.00 | -317.20 | -261.34 | -174.24 | -164.71 | -97.42  | -19.56  | -13.52  | -1.24   | 0.00    | 10.16   | 35.30   | 47.76  | 49.72  | 62.21  | 86.60  | 142.76 |
| 30                   | -473.64 | -331.16 | -327.36 | -271.50 | -184.40 | -174.87 | -107.58 | -29.72  | -23.68  | -11.40  | -10.16  | 0.00    | 25.14   | 37.60  | 39.56  | 52.05  | 76.44  | 132.60 |
| 37                   | -498.78 | -356.30 | -352.50 | -296.64 | -209.54 | -200.01 | -132.72 | -54.86  | -48.82  | -36.54  | -35.30  | -25.14  | 0.00    | 12.46  | 14.42  | 26.91  | 51.30  | 107.46 |
| 53                   | -511.24 | -368.76 | -364.96 | -309.10 | -222.00 | -212.47 | -145.18 | -67.32  | -61.28  | -49.00  | -47.76  | -37.60  | -12.46  | 0.00   | 1.96   | 14.45  | 38.84  | 95.00  |
| 41                   | -513.20 | -370.72 | -366.92 | -311.06 | -223.96 | -214.43 | -147.14 | -69.28  | -63.24  | -50.96  | -49.72  | -39.56  | -14.42  | -1.96  | 0.00   | 12.49  | 36.88  | 93.04  |
| 46                   | -525.69 | -383.21 | -379.41 | -323.55 | -236.45 | -226.92 | -159.63 | -81.77  | -75.73  | -63.45  | -62.21  | -52.05  | -26.91  | -14.45 | -12.49 | 0.00   | 24.39  | 80.55  |
| 51                   | -550.08 | -407.60 | -403.80 | -347.94 | -260.84 | -251.31 | -184.02 | -106.16 | -100.12 | -87.84  | -86.60  | -76.44  | -51.30  | -38.84 | -36.88 | -24.39 | 0.00   | 56.16  |
| 00                   | -606.24 | -463.76 | -459.96 | -404.10 | -317.00 | -307.47 | -240.18 | -162.32 | -156.28 | -144.00 | -142.76 | -132.60 | -107.46 | -95.00 | -93.04 | -80.55 | -56.16 | 0.00   |

| Level |   |   |   |   |   | Mean      |           |
|-------|---|---|---|---|---|-----------|-----------|
| 12    | A |   |   |   |   | 612.24000 |           |
| 01    | A | B |   |   |   | 469.76000 |           |
| 15    | A | B |   |   |   | 465.96000 |           |
| 09    | A | B | C |   |   | 410.10000 |           |
| 02    |   | B | C | D |   | 323.00000 |           |
| 06    |   | B | C | D | E | 313.46667 |           |
| 21    |   |   | C | D | E | F         | 246.18000 |
| 27    |   |   |   | D | E | F         | 168.32000 |
| 18    |   |   |   | D | E | F         | 162.27500 |
| 24    |   |   |   | D | E | F         | 150.00000 |
| 33    |   |   |   | D | E | F         | 148.76000 |
| 30    |   |   |   | D | E | F         | 138.60000 |
| 37    |   |   |   | D | E | F         | 113.46000 |
| 53    |   |   |   | D | E | F         | 101.00000 |
| 41    |   |   |   |   | E | F         | 99.04000  |
| 46    |   |   |   |   | E | F         | 86.55000  |
| 51    |   |   |   |   |   | F         | 62.16000  |
| 00    |   |   |   | D | E | F         | 6.00000   |

Levels not connected by same letter are significantly different.
