# Supplementary material for: Gene expression in mouse muscle over time after nickel pellet implantation
Source: Royal Society of Chemistry journal article supplement (doi:10.1039/c9mt00289h), 2020-02-12
Supplement: c9mt00289h6.xlsx [file c9mt00289h6.xlsx]

## Sheet: Sheet1
Column Headings indiate week; Term 2 = KEGG terms for 2 week timepoint
Summay Table in Column AF shows top KEGG pathways overall.
Colored cells show the same terms across time

## Sheet: KEGG Down
Term 2	Score 2	Term 6	Score 6	Term 9	Score 9	Term 9	Score 9	Term 12	Score 12	Term 15	Score 15	Term 18	Score 18	Term 21	Score 21	Term 24	Score 24	Term 27	Score 27	Term 30	Score 30	Term 33	Score 33	Term 37	Score 37	Term 41	Score 41	Term 46	Score 46		KEGG Pathway (Downreg. Genes)	Score
Fc epsilon RI signaling pathway	23.4852	SNARE interactions in vesicular transport	28.2569	Citrate cycle (TCA cycle)	23.5909	Citrate cycle (TCA cycle)	23.5909	Valine, leucine and isoleucine degradation	33.3614	Base excision repair	31.7799	Steroid biosynthesis	48.5446	Citrate cycle (TCA cycle)	108.233	Protein export	15.7152	Fatty acid biosynthesis	26.8362	Proteasome	33.8492	Citrate cycle (TCA cycle)	24.6682	TGF-beta signaling pathway	3.71069	Proximal tubule bicarbonate reclamation	34.2184	Viral carcinogenesis	22.2211		Citrate Cycle	217.974
Sulfur relay system	15.8447	Folate biosynthesis	20.2145	Glyoxylate and dicarboxylate metabolism	17.7914	Glyoxylate and dicarboxylate metabolism	17.7914	Oxidative phosphorylation	23.0545	VEGF signaling pathway	12.9704	Long-term depression	44.1485	Propanoate metabolism	41.2976	SNARE interactions in vesicular transport	11.7402	Caffeine metabolism	19.4637	Basal transcription factors	20.4131	Thiamine metabolism	22.6396	Phenylalanine metabolism	3.6456	Maturity onset diabetes of the young	25.0991	Prolactin signaling pathway	17.7218		Valine, leucine and isoleucine degradation	131.563
GnRH signaling pathway	13.8656	Valine, leucine and isoleucine degradation	17.7757	Propanoate metabolism	17.7914	Propanoate metabolism	17.7914	Parkinson disease	19.0033	Proximal tubule bicarbonate reclamation	12.6528	Gap junction	26.4947	Valine, leucine and isoleucine degradation	36.1189	One carbon pool by folate	11.2741	Ubiquitin mediated proteolysis	10.9633	Phosphonate and phosphinate metabolism	19.3419	Ubiquinone and other terpenoid-quinone biosynthesis	18.6831	Maturity onset diabetes of the young	2.63813	Citrate cycle (TCA cycle)	19.2713	Primary bile acid biosynthesis	15.6568		Propanoate metabolism	112.839
Metabolism of xenobiotics by cytochrome P450	13.8443	Peroxisome	15.6462	Valine, leucine and isoleucine degradation	16.0756	Valine, leucine and isoleucine degradation	16.0756	Ribosome	16.3322	Carbohydrate digestion and absorption	10.7347	TGF-beta signaling pathway	24.3027	Adipocytokine signaling pathway	21.3211	Autophagy	10.9833	RNA transport	10.6385	Propanoate metabolism	17.5728	Oxidative phosphorylation	17.9361	Phototransduction	2.63813	Porphyrin and chlorophyll metabolism	12.931	Riboflavin metabolism	9.35426		Peroxisome	96.1281
Ubiquinone and other terpenoid-quinone biosynthesis	9.89702	RNA polymerase	10.4093	Starch and sucrose metabolism	15.5035	Starch and sucrose metabolism	15.5035	Porphyrin and chlorophyll metabolism	15.2822	Tight junction	10.1402	Chagas disease (American trypanosomiasis)	20.0588	Fatty acid degradation	20.9744	Sulfur relay system	8.97181	Systemic lupus erythematosus	10.128	Aminoacyl-tRNA biosynthesis	15.5669	Proteasome	17.1505	RNA polymerase	2.44568	Pancreatic cancer	12.3852	RNA transport	9.33412		Glyoxylate and dicarboxylate metabolism	79.2189
Ubiquitin mediated proteolysis	9.57114	Glyoxylate and dicarboxylate metabolism	8.37161	GnRH signaling pathway	15.3904	GnRH signaling pathway	15.3904	Thermogenesis	15.214	GnRH signaling pathway	9.96541	Cholinergic synapse	17.3323	Thermogenesis	17.1372	Fluid shear stress and atherosclerosis	8.78563	SNARE interactions in vesicular transport	6.51919	Protein export	12.965	RNA transport	17.0483	Circadian rhythm	2.11272	Nitrogen metabolism	10.491	Alcoholism	8.45475		Ubiquitin mediated proteolysis	76.0314
Systemic lupus erythematosus	8.85223	Vitamin B6 metabolism	8.14275	Peroxisome	14.9914	Peroxisome	14.9914	Alzheimer disease	14.9946	Fc epsilon RI signaling pathway	9.53653	Sphingolipid signaling pathway	14.9357	Circadian rhythm	13.9584	Proteasome	6.26159	Necroptosis	6.21351	Peroxisome	11.8158	Ubiquitin mediated proteolysis	16.5978	Ubiquitin mediated proteolysis	1.86533	Steroid biosynthesis	8.86658	Bladder cancer	8.25511		Ubiquinone and other terpenoid-quinone biosynthesis	73.2938
Fluid shear stress and atherosclerosis	8.85223	Selenocompound metabolism	7.04808	Sulfur metabolism	13.6114	Sulfur metabolism	13.6114	Huntington disease	13.2322	Ubiquinone and other terpenoid-quinone biosynthesis	7.68696	Serotonergic synapse	13.493	PPAR signaling pathway	13.7601	Ribosome biogenesis in eukaryotes	6.09825	Fructose and mannose metabolism	5.85973	Ubiquitin mediated proteolysis	11.4196	Parkinson disease	14.7999	Primary bile acid biosynthesis	1.32339	Retinol metabolism	8.69417	ErbB signaling pathway	7.73465		GnRH signaling pathway	69.0114
Mitophagy	7.12637	Nucleotide excision repair	6.84458	Porphyrin and chlorophyll metabolism	13.5582	Porphyrin and chlorophyll metabolism	13.5582	Peroxisome	12.872	Amyotrophic lateral sclerosis (ALS)	7.51598	ABC transporters	13.2802	Pyruvate metabolism	13.1828	ABC transporters	5.75098	GnRH signaling pathway	5.57175	Citrate cycle (TCA cycle)	9.83752	Thermogenesis	14.7211	Tyrosine metabolism	1.09918	Ovarian steroidogenesis	7.37886	Peroxisome	7.73465		Oxidative phosphorylation	53.7553
Alcoholism	6.54264	Ribosome	6.82893	Thermogenesis	10.9918	Thermogenesis	10.9918	RNA polymerase	8.82608	Citrate cycle (TCA cycle)	6.63728	Cocaine addiction	13.2802	Cholesterol metabolism	11.107	Notch signaling pathway	5.51646	Primary immunodeficiency	5.56491	Alcoholism	8.82803	Systemic lupus erythematosus	12.3125	Leukocyte transendothelial migration	0.996097	Mismatch repair	7.07322	Mitophagy	7.60333		Starch and sucrose metabolism	48.6077
TNF signaling pathway	4.91789	DNA replication	6.38493	Aminoacyl-tRNA biosynthesis	10.5771	Aminoacyl-tRNA biosynthesis	10.5771	Mannose type O-glycan biosynthesis	7.1207	Pentose phosphate pathway	6.63728	Dopaminergic synapse	13.0055	Non-alcoholic fatty liver disease (NAFLD)	10.7959	Glyoxylate and dicarboxylate metabolism	4.72579	Oxytocin signaling pathway	5.34001	RNA transport	8.15349	Alcoholism	12.1949	One carbon pool by folate	0.942866	Other types of O-glycan biosynthesis	7.07322	Nucleotide excision repair	7.53538		Fatty acid degradation	37.9997
Salivary secretion	4.6422	RNA transport	5.75515	Phosphonate and phosphinate metabolism	9.93878	Phosphonate and phosphinate metabolism	9.93878	Sulfur metabolism	7.07827	Insulin secretion	5.87693	Adrenergic signaling in cardiomyocytes	11.1686	Parkinson disease	10.1559	Hippo signaling pathway	4.3876	Chemical carcinogenesis	5.06604	Systemic lupus erythematosus	8.15247	Terpenoid backbone biosynthesis	10.0995	Basal transcription factors	0.920796	Mannose type O-glycan biosynthesis	6.59806	Cellular senescence	7.21941
Drug metabolism	4.54083	Ubiquinone and other terpenoid-quinone biosynthesis	5.65521	Ubiquinone and other terpenoid-quinone biosynthesis	9.33762	Ubiquinone and other terpenoid-quinone biosynthesis	9.33762	Vitamin B6 metabolism	7.07827	Neurotrophin signaling pathway	5.20574	Regulation of lipolysis in adipocytes	10.5637	Alzheimer disease	10.0742	Fatty acid biosynthesis	3.67501	Thiamine metabolism	4.86249	Valine, leucine and isoleucine degradation	7.56771	Huntington disease	9.42968	Cell cycle	0.791736	Vitamin digestion and absorption	6.17015	Insulin signaling pathway	6.6284
ErbB signaling pathway	3.97113	Pyrimidine metabolism	5.29265	Vasopressin-regulated water reabsorption	8.31421	Vasopressin-regulated water reabsorption	8.31421	Propanoate metabolism	7.04922	Pyruvate metabolism	4.84244	Ovarian steroidogenesis	10.2867	AMPK signaling pathway	9.73431	Oocyte meiosis	3.40767	Ferroptosis	4.57211	Ubiquinone and other terpenoid-quinone biosynthesis	6.89572	Nucleotide excision repair	8.4781	Adherens junction	0.766279	Asthma	5.78322	Systemic lupus erythematosus	6.18116
Peroxisome	3.97113	Propanoate metabolism	4.37249	Ubiquitin mediated proteolysis	7.90371	Ubiquitin mediated proteolysis	7.90371	Selenocompound metabolism	6.02773	Bladder cancer	4.19265	Hippo signaling pathway	9.89859	Purine metabolism	9.72628	Thyroid cancer	3.35634	Alcoholism	4.53946	Porphyrin and chlorophyll metabolism	5.67955	Alzheimer disease	8.38011	Mismatch repair	0.695695	Glycolysis / Gluconeogenesis	5.51601	Amino sugar and nucleotide sugar metabolism	5.82788
Hepatitis B	3.7774	Mismatch repair	4.1397	Systemic lupus erythematosus	7.00693	Systemic lupus erythematosus	7.00693	Base excision repair	5.32588	Porphyrin and chlorophyll metabolism	4.19265	Aminoacyl-tRNA biosynthesis	8.2326	Riboflavin metabolism	9.342	Thiamine metabolism	3.27087	Primary bile acid biosynthesis	4.37622	Glyoxylate and dicarboxylate metabolism	5.57489	Peroxisome	8.30293	Cocaine addiction	0.695164	Collecting duct acid secretion	5.11218	mRNA surveillance pathway	5.74334
Glycosaminoglycan biosynthesis	3.50735	Aminoacyl-tRNA biosynthesis	3.73223	Galactose metabolism	6.91122	Galactose metabolism	6.91122	Butanoate metabolism	5.01359	Proteoglycans in cancer	4.07115	Thyroid hormone synthesis	7.0434	Sulfur relay system	9.342	Transcriptional misregulation in cancer	2.96642	Fluid shear stress and atherosclerosis	3.65706	Nucleotide excision repair	5.0771	Aminoacyl-tRNA biosynthesis	7.42318	Tryptophan metabolism	0.695164	p53 signaling pathway	4.95457	Adherens junction	5.73688
Influenza A	3.50235	Base excision repair	3.28024	Parkinson disease	6.8406	Parkinson disease	6.8406	Ubiquinone and other terpenoid-quinone biosynthesis	4.87839	Prolactin signaling pathway	3.88275	Gastric acid secretion	6.89533	Alanine, aspartate and glutamate metabolism	8.84497	Cell cycle	2.92927	Proteasome	3.49096	Mannose type O-glycan biosynthesis	4.7401	Ribosome	5.79702	Type II diabetes mellitus	0.695164	Glyoxylate and dicarboxylate metabolism	4.07916	Sphingolipid signaling pathway	5.43062
Chemical carcinogenesis	3.10697	Glycosylphosphatidylinositol (GPI)-anchor biosynthesis	3.12188	Mitophagy	6.39155	Mitophagy	6.39155	Non-alcoholic fatty liver disease (NAFLD)	4.85145	Selenocompound metabolism	3.82369	Pertussis	6.61319	Mismatch repair	8.46296	Aminoacyl-tRNA biosynthesis	2.91927	Arginine and proline metabolism	2.95561	Viral carcinogenesis	4.38684	Glyoxylate and dicarboxylate metabolism	5.39309	AGE-RAGE signaling pathway in diabetic complications	0.694003	Propanoate metabolism	4.07916	Glyoxylate and dicarboxylate metabolism	4.97432
Mannose type O-glycan biosynthesis	3.03394	Phosphonate and phosphinate metabolism	3.07637	Autophagy	6.28673	Autophagy	6.28673	Non-homologous end-joining	3.52355	Ubiquitin mediated proteolysis	3.79442	Renin secretion	6.61319	Glucagon signaling pathway	8.43731	Ferroptosis	2.86954	Peroxisome	2.89492	Thermogenesis	4.24481	Purine metabolism	5.30717	Longevity regulating pathway	0.671551	Galactose metabolism	3.86969	Autophagy	4.8332
Toll-like receptor signaling pathway	2.76444	Cysteine and methionine metabolism	2.63039	Regulation of lipolysis in adipocytes	6.15645	Regulation of lipolysis in adipocytes	6.15645	SNARE interactions in vesicular transport	3.12614	Bacterial invasion of epithelial cells	3.65995	Steroid hormone biosynthesis	5.14402	Thiamine metabolism	8.33253	Long-term potentiation	2.8214	PPAR signaling pathway	2.81831	Folate biosynthesis	3.64239	Viral carcinogenesis	5.18862	Cholesterol metabolism	0.658359	RNA degradation	3.67842	Biosynthesis of unsaturated fatty acids	4.68621
Viral carcinogenesis	2.75767	Linoleic acid metabolism	2.63039	Riboflavin metabolism	5.91387	Riboflavin metabolism	5.91387	TGF-beta signaling pathway	2.74238	Pertussis	3.45333	Thermogenesis	5.10649	Metabolism of xenobiotics by cytochrome P450	7.77913	mRNA surveillance pathway	2.77103	Autophagy	2.3483	Fatty acid degradation	3.5	Non-alcoholic fatty liver disease (NAFLD)	5.05082	Terpenoid backbone biosynthesis	0.632526	Starch and sucrose metabolism	3.67579	Hepatitis B	4.41594
Glycerolipid metabolism	2.64313	Butanoate metabolism	2.61577	Sulfur relay system	5.91387	Sulfur relay system	5.91387	Phosphonate and phosphinate metabolism	2.67698	Salivary secretion	3.26139	Progesterone-mediated oocyte maturation	5.05206	Mannose type O-glycan biosynthesis	7.71584	Amphetamine addiction	2.72763	Lysine degradation	2.09459	Pyruvate metabolism	3.49286	Glucagon signaling pathway	4.83883	Synaptic vesicle cycle	0.626195	Base excision repair	3.32868	Pentose and glucuronate interconversions	4.17545
Asthma	2.62606	Protein export	2.40121	Oocyte meiosis	5.72483	Oocyte meiosis	5.72483	Glycosylphosphatidylinositol (GPI)-anchor biosynthesis	2.60462	Salmonella infection	3.26139	GABAergic synapse	5.05206	Glyoxylate and dicarboxylate metabolism	7.67449	Selenocompound metabolism	2.63616	Glycerophospholipid metabolism	2.06987	Amyotrophic lateral sclerosis (ALS)	3.16248	Mannose type O-glycan biosynthesis	4.59207	N-Glycan biosynthesis	0.623843	Nicotinate and nicotinamide metabolism	3.17293	Prion diseases	4.17545
Folate biosynthesis	2.45134	Glycine, serine and threonine metabolism	2.34516	Fatty acid degradation	5.61871	Fatty acid degradation	5.61871	Folate biosynthesis	2.37427	Adrenergic signaling in cardiomyocytes	3.17933	Morphine addiction	4.87541	Sulfur metabolism	7.58407	Basal transcription factors	2.47237	Asthma	2.03077	Oxidative phosphorylation	3.06068	Legionellosis	4.09306	Histidine metabolism	0.576611	Thyroid cancer	3.02762	VEGF signaling pathway	4.11381
Phototransduction	2.29286	Huntington disease	1.9593	Nucleotide excision repair	5.38612	Nucleotide excision repair	5.38612	Alanine, aspartate and glutamate metabolism	2.34035	Leukocyte transendothelial migration	3.02722	mRNA surveillance pathway	4.54886	Starch and sucrose metabolism	6.67006	RNA transport	2.28333	alpha-Linolenic acid metabolism	2.03077	Selenocompound metabolism	2.99558	RNA degradation	4.01041	Cell adhesion molecules (CAMs)	0.469736	Pyruvate metabolism	2.89182	Focal adhesion	3.99277
Glycolysis / Gluconeogenesis	2.17203	Basal transcription factors	1.93648	Alzheimer disease	5.07332	Alzheimer disease	5.07332	Fatty acid degradation	2.11258	Thyroid hormone signaling pathway	3.02722	Circadian entrainment	4.32499	Oxidative phosphorylation	6.33058	Dopaminergic synapse	2.27988	Choline metabolism in cancer	1.97022	Dopaminergic synapse	2.98394	mRNA surveillance pathway	3.96842	Ascorbate and aldarate metabolism	0.442888	Homologous recombination	2.53358	Fatty acid biosynthesis	3.84777
Protein export	2.14862	RNA degradation	1.86403	Amyotrophic lateral sclerosis (ALS)	5.04675	Amyotrophic lateral sclerosis (ALS)	5.04675	Retrograde endocannabinoid signaling	2.03833	Fatty acid degradation	2.83324	Melanogenesis	4.25401	Huntington disease	6.06554	Insulin signaling pathway	2.10155	Folate biosynthesis	1.89108	Amphetamine addiction	2.76339	Retrograde endocannabinoid signaling	3.84993	Collecting duct acid secretion	0.442888	Carbohydrate digestion and absorption	2.3293	Th1 and Th2 cell differentiation	3.75013
Ribosome biogenesis in eukaryotes	1.94294	Sulfur relay system	1.84618	Thiamine metabolism	5.00528	Thiamine metabolism	5.00528	Ubiquitin mediated proteolysis	1.99217	Sphingolipid signaling pathway	2.51155	Aldosterone synthesis and secretion	4.11716	Mitophagy	5.95063	Cysteine and methionine metabolism	1.7898	Glucagon signaling pathway	1.83147	mRNA surveillance pathway	2.71046	Phosphonate and phosphinate metabolism	3.61597	Oocyte meiosis	0.427234	Nucleotide excision repair	2.3293	Thyroid hormone signaling pathway	3.73036
Circadian rhythm	1.89644	Citrate cycle (TCA cycle)	1.73242	Insulin signaling pathway	4.96866	Insulin signaling pathway	4.96866	Protein export	1.98435	Inflammatory mediator regulation of TRP channels	2.36355	Parathyroid hormone synthesis, secretion and action	3.80237	Base excision repair	5.82584	Mismatch repair	1.65655	Mitophagy	1.817	Oxytocin signaling pathway	2.66976	Alanine, aspartate and glutamate metabolism	3.59111	Legionellosis	0.41245	Insulin resistance	2.0696	Thyroid cancer	3.54258
Protein processing in endoplasmic reticulum	1.89418	Systemic lupus erythematosus	1.6142	RNA transport	4.92567	RNA transport	4.92567	Ferroptosis	1.90234	Progesterone-mediated oocyte maturation	2.35383	Toxoplasmosis	3.7437	Other glycan degradation	5.79973	Other types of O-glycan biosynthesis	1.65655	Calcium signaling pathway	1.72028	Legionellosis	2.35693	Primary bile acid biosynthesis	3.28435	Colorectal cancer	0.407976	Proteasome	2.06454	Tuberculosis	3.47127
Kaposi sarcoma-associated herpesvirus infection	1.77412	Proteasome	1.60857	Insulin secretion	4.91534	Insulin secretion	4.91534	Glutathione metabolism	1.89735	Protein digestion and absorption	2.35383	C-type lectin receptor signaling pathway	3.52192	Pantothenate and CoA biosynthesis	5.79973	Proximal tubule bicarbonate reclamation	1.65655	Protein export	1.6496	Pyrimidine metabolism	2.35693	cGMP-PKG signaling pathway	3.22003	Mucin type O-glycan biosynthesis	0.407241	Amino sugar and nucleotide sugar metabolism	1.84053	GnRH signaling pathway	3.46231
Neurotrophin signaling pathway	1.71412	Fructose and mannose metabolism	1.37501	Retrograde endocannabinoid signaling	4.74433	Retrograde endocannabinoid signaling	4.74433	Fatty acid elongation	1.81884	Terpenoid backbone biosynthesis	2.27167	Glutamatergic synapse	3.41823	Autophagy	5.33798	Mannose type O-glycan biosynthesis	1.52431	RNA polymerase	1.6496	beta-Alanine metabolism	2.26356	Ferroptosis	2.9714	Phospholipase D signaling pathway	0.382371	Cysteine and methionine metabolism	1.77348	Thiamine metabolism	3.42686
Glioma	1.7001	Cholesterol metabolism	1.34293	Adipocytokine signaling pathway	4.50466	Adipocytokine signaling pathway	4.50466	Metabolism of xenobiotics by cytochrome P450	1.72271	Influenza A	2.2674	Leukocyte transendothelial migration	3.36805	Pyrimidine metabolism	4.7653	Epstein-Barr virus infection	1.46306	Aminoacyl-tRNA biosynthesis	1.63919	Riboflavin metabolism	2.25555	Porphyrin and chlorophyll metabolism	2.79426	Antigen processing and presentation	0.378117	Fanconi anemia pathway	1.7098	Non-small cell lung cancer	3.10398
Pancreatic cancer	1.7001	Purine metabolism	1.29952	Pyruvate metabolism	4.50338	Pyruvate metabolism	4.50338	Circadian rhythm	1.66973	Valine, leucine and isoleucine degradation	2.23915	Thyroid hormone signaling pathway	3.36805	Tryptophan metabolism	4.73698	Ovarian steroidogenesis	1.3311	Metabolism of xenobiotics by cytochrome P450	1.63919	Glucagon signaling pathway	2.23065	Amphetamine addiction	2.64665	Progesterone-mediated oocyte maturation	0.378117	Cell cycle	1.62086	Leishmaniasis	3.00108
Pentose phosphate pathway	1.68408	Fatty acid degradation	1.26577	Mannose type O-glycan biosynthesis	4.42308	Mannose type O-glycan biosynthesis	4.42308	Sulfur relay system	1.59031	Rap1 signaling pathway	2.23276	Oocyte meiosis	3.31895	Dopaminergic synapse	4.71535	Glycosylphosphatidylinositol (GPI)-anchor biosynthesis	1.30049	Toxoplasmosis	1.5878	SNARE interactions in vesicular transport	2.10182	Pantothenate and CoA biosynthesis	2.58028	Neurotrophin signaling pathway	0.36459	Regulation of lipolysis in adipocytes	1.43486	Renal cell carcinoma	2.90245
Hepatocellular carcinoma	1.66361	Chemical carcinogenesis	1.21392	Oxytocin signaling pathway	4.29411	Oxytocin signaling pathway	4.29411	Arginine biosynthesis	1.57246	FoxO signaling pathway	2.13926	Cytokine-cytokine receptor interaction	3.25591	Longevity regulating pathway	4.58951	Phototransduction	1.1194	Amphetamine addiction	1.53285	Ribosome	1.83223	Circadian rhythm	2.54435	Glycerolipid metabolism	0.355515	FoxO signaling pathway	1.38105	Choline metabolism in cancer	2.74722
Sphingolipid signaling pathway	1.61196	Amyotrophic lateral sclerosis (ALS)	1.12597	Adrenergic signaling in cardiomyocytes	3.9303	Adrenergic signaling in cardiomyocytes	3.9303	Basal transcription factors	1.55698	Histidine metabolism	2.105	Platelet activation	2.92058	Oocyte meiosis	4.246	Phosphatidylinositol signaling system	1.09692	Fc epsilon RI signaling pathway	1.53285	Notch signaling pathway	1.82514	Cortisol synthesis and secretion	2.53745	Long-term depression	0.355515	Spliceosome	1.38105	Adipocytokine signaling pathway	2.63005
Starch and sucrose metabolism	1.59025	Pyruvate metabolism	1.10165	Cholesterol metabolism	3.77417	Cholesterol metabolism	3.77417	Nucleotide excision repair	1.55698	Purine metabolism	1.97775	AMPK signaling pathway	2.88068	Tyrosine metabolism	4.22874	Basal cell carcinoma	1.04996	Renal cell carcinoma	1.53285	Sulfur metabolism	1.82186	Riboflavin metabolism	2.19428	cAMP signaling pathway	0.352442	Endometrial cancer	1.34195	Vasopressin-regulated water reabsorption	2.61673
SNARE interactions in vesicular transport	1.59025	Glycerophospholipid metabolism	1.08163	Calcium signaling pathway	3.71872	Calcium signaling pathway	3.71872	Glyoxylate and dicarboxylate metabolism	1.53507	Signaling pathways regulating pluripotency of stem cells	1.93964	Inflammatory mediator regulation of TRP channels	2.84156	Oxytocin signaling pathway	3.96477	Mitophagy	1.04996	Adipocytokine signaling pathway	1.38914	Mismatch repair	1.72926	Sulfur relay system	2.19428	mTOR signaling pathway	0.333067	Lysine degradation	1.29859	AGE-RAGE signaling pathway in diabetic complications	2.61346
Necroptosis	1.53601	Amphetamine addiction	1.04687	PPAR signaling pathway	3.65058	PPAR signaling pathway	3.65058	Pyrimidine metabolism	1.35503	Toll-like receptor signaling pathway	1.87254	Relaxin signaling pathway	2.69255	Amyotrophic lateral sclerosis (ALS)	3.84518	Signaling pathways regulating pluripotency of stem cells	1.04793	Biosynthesis of unsaturated fatty acids	1.28078	Other types of O-glycan biosynthesis	1.72926	Oocyte meiosis	2.16151	Sphingolipid signaling pathway	0.331694	Cytosolic DNA-sensing pathway	1.21745	Spliceosome	2.61108
Pentose and glucuronate interconversions	1.50354	Drug metabolism	1.00772	Cysteine and methionine metabolism	3.56332	Cysteine and methionine metabolism	3.56332	Inflammatory bowel disease (IBD)	1.28379	Axon guidance	1.8661	Estrogen signaling pathway	2.58809	Non-homologous end-joining	3.80411	Ubiquitin mediated proteolysis	1.02501	beta-Alanine metabolism	1.28078	Hippo signaling pathway	1.6316	Longevity regulating pathway	2.12183	Chemical carcinogenesis	0.325264	Basal cell carcinoma	1.14307	Th17 cell differentiation	2.54952
Prion diseases	1.50354	Synthesis and degradation of ketone bodies	1.00191	cGMP-PKG signaling pathway	3.4989	cGMP-PKG signaling pathway	3.4989	Cytosolic DNA-sensing pathway	1.15329	Vascular smooth muscle contraction	1.83035	Apelin signaling pathway	2.45767	Pentose phosphate pathway	3.69633	Glucagon signaling pathway	0.982249	Protein processing in endoplasmic reticulum	1.26763	Alzheimer disease	1.62897	Adrenergic signaling in cardiomyocytes	2.03131	Cellular senescence	0.323724	Epstein-Barr virus infection	1.11658	Pantothenate and CoA biosynthesis	2.50249
Epstein-Barr virus infection	1.49141	Taurine and hypotaurine metabolism	1.00191	Thyroid hormone signaling pathway	3.39869	Thyroid hormone signaling pathway	3.39869	Proximal tubule bicarbonate reclamation	1.11488	Melanogenesis	1.82683	Measles	2.27906	Glutathione metabolism	3.63705	Longevity regulating pathway	0.982249	Glioma	1.22282	Parkinson disease	1.59513	SNARE interactions in vesicular transport	2.02564	Central carbon metabolism in cancer	0.307358	Aminoacyl-tRNA biosynthesis	1.04263	Chagas disease (American trypanosomiasis)	2.48744
Osteoclast differentiation	1.48688	alpha-Linolenic acid metabolism	0.99097	Pantothenate and CoA biosynthesis	3.36557	Pantothenate and CoA biosynthesis	3.36557	Necroptosis	1.00865	T cell receptor signaling pathway	1.78247	Parkinson disease	2.27906	Vasopressin-regulated water reabsorption	3.52441	Fatty acid elongation	0.970884	Starch and sucrose metabolism	1.20659	Terpenoid backbone biosynthesis	1.56456	Starch and sucrose metabolism	2.02564	Pentose phosphate pathway	0.29602	Non-small cell lung cancer	1.04263	Pancreatic cancer	2.31463
Base excision repair	1.42325	Nicotine addiction	0.954504	Salivary secretion	3.3491	Salivary secretion	3.3491	Aminoacyl-tRNA biosynthesis	0.885812	Th17 cell differentiation	1.7394	Neuroactive ligand-receptor interaction	2.27279	Retrograde endocannabinoid signaling	3.26293	Circadian rhythm	0.906481	Base excision repair	1.07485	Long-term potentiation	1.55072	Progesterone-mediated oocyte maturation	1.94189	beta-Alanine metabolism	0.29602	Fc epsilon RI signaling pathway	0.982196	One carbon pool by folate	2.27409
Fructose and mannose metabolism	1.42325	Spliceosome	0.921194	Glycerophospholipid metabolism	3.2951	Glycerophospholipid metabolism	3.2951	Pyruvate metabolism	0.880628	Ascorbate and aldarate metabolism	1.69762	Retrograde endocannabinoid signaling	2.11843	GnRH signaling pathway	3.21557	Cellular senescence	0.867303	AMPK signaling pathway	1.05755	RNA degradation	1.50778	Dopaminergic synapse	1.92225	Calcium signaling pathway	0.293122	RIG-I-like receptor signaling pathway	0.982196	Proteasome	2.27278
Relaxin signaling pathway	1.40062	Porphyrin and chlorophyll metabolism	0.889508	AMPK signaling pathway	3.25322	AMPK signaling pathway	3.25322	Long-term potentiation	0.840786	Phototransduction	1.69762	Oxytocin signaling pathway	2.02014	Glycolysis / Gluconeogenesis	3.18942	Propanoate metabolism	0.847657	Inflammatory mediator regulation of TRP channels	1.03478	Spliceosome	1.42886	ABC transporters	1.85249	Hippo signaling pathway	0.290212	Adipocytokine signaling pathway	0.900052	Chronic myeloid leukemia	2.24323
ECM-receptor interaction	1.35156	Oxidative phosphorylation	0.863649	Synthesis and degradation of ketone bodies	3.18258	Synthesis and degradation of ketone bodies	3.18258	Renal cell carcinoma	0.798188	Protein export	1.58643	Cushing syndrome	1.90613	Amphetamine addiction	3.05427	Calcium signaling pathway	0.805602	Nicotinate and nicotinamide metabolism	1.01624	Oocyte meiosis	1.42871	Mitophagy	1.78169	Phosphatidylinositol signaling system	0.280283	Adherens junction	0.874717	Toxoplasmosis	2.20276
Renin-angiotensin system	1.34876	Collecting duct acid secretion	0.816662	Base excision repair	3.10517	Base excision repair	3.10517	Systemic lupus erythematosus	0.738706	Non-small cell lung cancer	1.56429	Hepatitis C	1.88442	Fructose and mannose metabolism	2.97281	Biosynthesis of unsaturated fatty acids	0.793797	ErbB signaling pathway	0.930192	Glycosylphosphatidylinositol (GPI)-anchor biosynthesis	1.29045	Sulfur metabolism	1.7709	Metabolism of xenobiotics by cytochrome P450	0.279354	Bile secretion	0.874717	Necroptosis	2.11946
Dopaminergic synapse	1.29466	Alcoholism	0.812392	Fructose and mannose metabolism	3.10517	Fructose and mannose metabolism	3.10517	Drug metabolism	0.725911	Gastric cancer	1.51434	Tight junction	1.74175	Phosphonate and phosphinate metabolism	2.86677	Insulin resistance	0.791893	Estrogen signaling pathway	0.890373	Ferroptosis	1.28914	Cholesterol metabolism	1.75094	SNARE interactions in vesicular transport	0.274327	Melanoma	0.874717	Salmonella infection	2.10838
MAPK signaling pathway	1.28533	Carbohydrate digestion and absorption	0.77412	Circadian entrainment	3.0666	Circadian entrainment	3.0666	p53 signaling pathway	0.683565	Glycolysis / Gluconeogenesis	1.51203	Hepatocellular carcinoma	1.66694	Hepatocellular carcinoma	2.67557	Bile secretion	0.752061	Insulin secretion	0.87727	Insulin signaling pathway	1.1674	Base excision repair	1.75087	Choline metabolism in cancer	0.270112	Inositol phosphate metabolism	0.850322	Tryptophan metabolism	2.07579
Signaling pathways regulating pluripotency of stem cells	1.24524	Vasopressin-regulated water reabsorption	0.77412	Dilated cardiomyopathy (DCM)	3.00901	Dilated cardiomyopathy (DCM)	3.00901	Th1 and Th2 cell differentiation	0.648642	Leishmaniasis	1.51203	cGMP-PKG signaling pathway	1.64895	ABC transporters	2.63566	Starch and sucrose metabolism	0.74437	Viral myocarditis	0.85218	GnRH signaling pathway	1.14903	Cysteine and methionine metabolism	1.65578	FoxO signaling pathway	0.258214	Hepatitis B	0.830809	Type II diabetes mellitus	2.07579
Tyrosine metabolism	1.09884	Mineral absorption	0.722868	Butanoate metabolism	3.00709	Butanoate metabolism	3.00709	Carbohydrate digestion and absorption	0.608011	Long-term potentiation	1.51203	Tuberculosis	1.54644	Cocaine addiction	2.63566	Inositol phosphate metabolism	0.72569	Nicotine addiction	0.82033	Gastric acid secretion	1.13484	Cushing syndrome	1.53536	Pentose and glucuronate interconversions	0.25455	Gastric acid secretion	0.826824	Kaposi sarcoma-associated herpesvirus infection	1.94391
Fat digestion and absorption	1.09884	Non-homologous end-joining	0.709664	One carbon pool by folate	2.97602	One carbon pool by folate	2.97602	Purine metabolism	0.562713	Toxoplasmosis	1.50575	Axon guidance	1.51423	Peroxisome	2.58547	mTOR signaling pathway	0.724457	Arachidonic acid metabolism	0.804551	Huntington disease	1.09023	Long-term potentiation	1.48057	Amphetamine addiction	0.254182	Glioma	0.804178	Cysteine and methionine metabolism	1.90038
Porphyrin and chlorophyll metabolism	1.04634	Fatty acid elongation	0.677967	Alcoholism	2.9725	Alcoholism	2.9725	RNA transport	0.554085	RIG-I-like receptor signaling pathway	1.46197	Phagosome	1.51423	Long-term depression	2.46318	Gastric acid secretion	0.700415	Insulin signaling pathway	0.801345	Butanoate metabolism	1.07371	Pyruvate metabolism	1.41806	DNA replication	0.236483	Chronic myeloid leukemia	0.782346	Fanconi anemia pathway	1.81982
Adrenergic signaling in cardiomyocytes	1.00984	Cardiac muscle contraction	0.647847	MAPK signaling pathway	2.85553	MAPK signaling pathway	2.85553	Small cell lung cancer	0.516904	Renal cell carcinoma	1.46197	Calcium signaling pathway	1.38024	Gap junction	2.39701	Thyroid hormone signaling pathway	0.694371	Bladder cancer	0.779346	Lysine degradation	1.06904	Renal cell carcinoma	1.41444	Fructose and mannose metabolism	0.236483	Tight junction	0.781153	Amyotrophic lateral sclerosis (ALS)	1.74359
Vasopressin-regulated water reabsorption	0.95106	Circadian rhythm	0.619212	Inositol phosphate metabolism	2.77918	Inositol phosphate metabolism	2.77918	Long-term depression	0.51358	TNF signaling pathway	1.43635	Chemokine signaling pathway	1.27446	Hypertrophic cardiomyopathy (HCM)	2.39701	Glioma	0.676182	Homologous recombination	0.779346	Necroptosis	1.06504	Insulin secretion	1.27447	Viral carcinogenesis	0.233759	Autoimmune thyroid disease	0.740974	Mismatch repair	1.74315
Nucleotide excision repair	0.95106	Fatty acid biosynthesis	0.605145	Glucagon signaling pathway	2.75407	Glucagon signaling pathway	2.75407	Proteasome	0.490568	Oxytocin signaling pathway	1.40586	Alcoholism	1.24976	Butanoate metabolism	2.3794	DNA replication	0.657025	Porphyrin and chlorophyll metabolism	0.779346	Vasopressin-regulated water reabsorption	1.05909	Aldosterone synthesis and secretion	1.268	Renin-angiotensin system	0.219947	PPAR signaling pathway	0.616905	Neurotrophin signaling pathway	1.62476
Hedgehog signaling pathway	0.907761	mRNA surveillance pathway	0.601164	Alanine, aspartate and glutamate metabolism	2.67351	Alanine, aspartate and glutamate metabolism	2.67351	Chemical carcinogenesis	0.472141	Circadian rhythm	1.39257	Rap1 signaling pathway	1.13555	Arginine and proline metabolism	2.3554	Chronic myeloid leukemia	0.65294	Intestinal immune network for IgA production	0.705139	Inflammatory mediator regulation of TRP channels	1.01201	Endocrine and other factor-regulated calcium reabsorption	1.26054	Thyroid cancer	0.204787	Colorectal cancer	0.572016	Mannose type O-glycan biosynthesis	1.60497
mTOR signaling pathway	0.90338	Ether lipid metabolism	0.590633	Thyroid cancer	2.67351	Thyroid cancer	2.67351	Ether lipid metabolism	0.457179	C-type lectin receptor signaling pathway	1.37072	cAMP signaling pathway	1.11443	C-type lectin receptor signaling pathway	2.32931	Pertussis	0.65294	Nucleotide excision repair	0.705139	RNA polymerase	0.982201	Glycosylphosphatidylinositol (GPI)-anchor biosynthesis	1.24486	Inositol phosphate metabolism	0.201605	Steroid hormone biosynthesis	0.557995	Terpenoid backbone biosynthesis	1.60497
Choline metabolism in cancer	0.88512	Viral carcinogenesis	0.572424	Proteasome	2.66617	Proteasome	2.66617	Mitophagy	0.456907	Adipocytokine signaling pathway	1.32379	Human immunodeficiency virus 1 infection	0.87467	Selenocompound metabolism	2.19137	Renin secretion	0.65294	Staphylococcus aureus infection	0.679677	Circadian rhythm	0.826056	Adipocytokine signaling pathway	1.23481	Parathyroid hormone synthesis, secretion and action	0.201579	Small cell lung cancer	0.518498	Cell cycle	1.55245
Circadian entrainment	0.88512	Cocaine addiction	0.552747	Gastric acid secretion	2.65684	Gastric acid secretion	2.65684	Thiamine metabolism	0.432842	Glyoxylate and dicarboxylate metabolism	1.30778	Olfactory transduction	0.861359	Drug metabolism	2.18705	Human T-cell leukemia virus 1 infection	0.623225	Hedgehog signaling pathway	0.671499	Melanogenesis	0.785141	Valine, leucine and isoleucine degradation	1.19505	Bacterial invasion of epithelial cells	0.192605	Hematopoietic cell lineage	0.494142	Endocrine and other factor-regulated calcium reabsorption	1.53806
Melanogenesis	0.863123	Tryptophan metabolism	0.552747	Oxidative phosphorylation	2.55722	Oxidative phosphorylation	2.55722	mRNA surveillance pathway	0.43129	Propanoate metabolism	1.30778	Human cytomegalovirus infection	0.758042	Thyroid hormone signaling pathway	2.11932	Nicotinate and nicotinamide metabolism	0.618349	Mineral absorption	0.671499	cGMP-PKG signaling pathway	0.75175	Homologous recombination	1.15771	Endocytosis	0.191162	mRNA surveillance pathway	0.471228	Endocytosis	1.53749
T cell receptor signaling pathway	0.841785	Adrenergic signaling in cardiomyocytes	0.54879	Glutamatergic synapse	2.55574	Glutamatergic synapse	2.55574	ABC transporters	0.426266	Adherens junction	1.28139	Endocytosis	0.676916	Glycine, serine and threonine metabolism	2.11032	Primary immunodeficiency	0.618349	Adrenergic signaling in cardiomyocytes	0.665397	Metabolism of xenobiotics by cytochrome P450	0.749693	Oxytocin signaling pathway	1.14534	Glioma	0.184044	NOD-like receptor signaling pathway	0.449469	Antigen processing and presentation	1.47774
Proteasome	0.82874	Thiamine metabolism	0.519715	Dopaminergic synapse	2.48134	Dopaminergic synapse	2.48134	Tryptophan metabolism	0.426266	Wnt signaling pathway	1.25932	PI3K-Akt signaling pathway	0.357557	Dilated cardiomyopathy (DCM)	2.06286	Protein processing in endoplasmic reticulum	0.59881	Glycosphingolipid biosynthesis	0.639924	Glycolysis / Gluconeogenesis	0.713333	Folate biosynthesis	1.13366	Pancreatic cancer	0.184044	Toll-like receptor signaling pathway	0.439328	AMPK signaling pathway	1.4508
Regulation of actin cytoskeleton	0.822511	Biosynthesis of unsaturated fatty acids	0.518739	Purine metabolism	2.40768	Purine metabolism	2.40768	Citrate cycle (TCA cycle)	0.412857	Oocyte meiosis	1.24981	Human papillomavirus infection	0.350481	Progesterone-mediated oocyte maturation	2.06286	Aldosterone-regulated sodium reabsorption	0.549434	Proteoglycans in cancer	0.637805	PPAR signaling pathway	0.705823	Gastric acid secretion	1.07982	African trypanosomiasis	0.178061	cAMP signaling pathway	0.413755	TGF-beta signaling pathway	1.43623
Aldosterone synthesis and secretion	0.82108	Pentose phosphate pathway	0.518739	mRNA surveillance pathway	2.39129	mRNA surveillance pathway	2.39129	Galactose metabolism	0.412857	Thyroid hormone synthesis	1.24067	Pathways in cancer	0.123854	Salmonella infection	2.00215	Pyruvate metabolism	0.549434	NOD-like receptor signaling pathway	0.616973	Cysteine and methionine metabolism	0.684263	Parathyroid hormone synthesis, secretion and action	1.0646	Chronic myeloid leukemia	0.1759	Glucagon signaling pathway	0.410111	Protein processing in endoplasmic reticulum	1.42699
Th17 cell differentiation	0.82108	beta-Alanine metabolism	0.518739	Glycolysis / Gluconeogenesis	2.35398	Glycolysis / Gluconeogenesis	2.35398	Pentose phosphate pathway	0.412857	beta-Alanine metabolism	1.22992			Homologous recombination	1.97552	AMPK signaling pathway	0.52383	Circadian entrainment	0.609179	Hypertrophic cardiomyopathy (HCM)	0.676475	Basal transcription factors	1.01512	Pertussis	0.1759	Pancreatic secretion	0.383299	Inflammatory mediator regulation of TRP channels	1.41862
Hepatitis C	0.809605	Metabolism of xenobiotics by cytochrome P450	0.515088	Long-term potentiation	2.35398	Long-term potentiation	2.35398	Amino sugar and nucleotide sugar metabolism	0.397621	Gastric acid secretion	1.20156			Porphyrin and chlorophyll metabolism	1.97552	African trypanosomiasis	0.518677	Ether lipid metabolism	0.582342	Thiamine metabolism	0.66242	Vasopressin-regulated water reabsorption	1.01512	Olfactory transduction	0.175862	Regulation of actin cytoskeleton	0.381261	Endometrial cancer	1.36226
ABC transporters	0.758589	Glycolysis / Gluconeogenesis	0.487999	Circadian rhythm	2.29591	Circadian rhythm	2.29591	Cholesterol metabolism	0.397621	Hepatitis B	1.19259			Non-small cell lung cancer	1.94398	Inflammatory mediator regulation of TRP channels	0.510803	Aldosterone synthesis and secretion	0.561933	Cell cycle	0.652217	Morphine addiction	1.00835	Ferroptosis	0.166266	Cholinergic synapse	0.321793	Pyrimidine metabolism	1.36226
JAK-STAT signaling pathway	0.753255	Dopaminergic synapse	0.484029	Amphetamine addiction	2.24154	Amphetamine addiction	2.24154	Malaria	0.397621	Glioma	1.16396			cGMP-PKG signaling pathway	1.90746	Hepatocellular carcinoma	0.506688	NF-kappa B signaling pathway	0.561933	Wnt signaling pathway	0.636494	Necroptosis	0.995161	Nicotine addiction	0.166266	Neuroactive ligand-receptor interaction	0.30567	Human T-cell leukemia virus 1 infection	1.27188
Amino sugar and nucleotide sugar metabolism	0.72644	Fanconi anemia pathway	0.454309	Fc epsilon RI signaling pathway	2.24154	Fc epsilon RI signaling pathway	2.24154	Tuberculosis	0.391418	Starch and sucrose metabolism	1.15825			FoxO signaling pathway	1.88761	cGMP-PKG signaling pathway	0.496283	Th17 cell differentiation	0.561933	Fluid shear stress and atherosclerosis	0.614221	Renin secretion	0.988283	Human T-cell leukemia virus 1 infection	0.161625	Oocyte meiosis	0.301923	FoxO signaling pathway	1.26944
Cholesterol metabolism	0.72644	Primary bile acid biosynthesis	0.44913	Choline metabolism in cancer	2.13298	Choline metabolism in cancer	2.13298	Starch and sucrose metabolism	0.377079	Prion diseases	1.09215			Parathyroid hormone synthesis, secretion and action	1.79267	Kaposi sarcoma-associated herpesvirus infection	0.493259	cAMP signaling pathway	0.558747	Protein processing in endoplasmic reticulum	0.583378	Protein export	0.945703	Cardiac muscle contraction	0.160769	Natural killer cell mediated cytotoxicity	0.289513	Cytosolic DNA-sensing pathway	1.21094
Notch signaling pathway	0.72644	Cortisol synthesis and secretion	0.438254	Mismatch repair	2.10186	Mismatch repair	2.10186	JAK-STAT signaling pathway	0.367562	DNA replication	1.03105			Endocrine and other factor-regulated calcium reabsorption	1.79206	Glycine, serine and threonine metabolism	0.490091	ABC transporters	0.556058	Primary bile acid biosynthesis	0.575862	RNA polymerase	0.945703	Homologous recombination	0.155386	PI3K-Akt signaling pathway	0.278889	Dopaminergic synapse	1.18849
RNA transport	0.713904	Nitrogen metabolism	0.390259	Melanogenesis	2.05335	Melanogenesis	2.05335	Th17 cell differentiation	0.328803	Fructose and mannose metabolism	1.03105			Calcium signaling pathway	1.76171	Alzheimer disease	0.466408	Cocaine addiction	0.556058	Dilated cardiomyopathy (DCM)	0.57129	Salivary secretion	0.905044	Porphyrin and chlorophyll metabolism	0.155386	Sphingolipid signaling pathway	0.255859	Collecting duct acid secretion	1.18146
Toxoplasmosis	0.70894	Arachidonic acid metabolism	0.386985	Relaxin signaling pathway	2.04486	Relaxin signaling pathway	2.04486	DNA replication	0.315616	cGMP-PKG signaling pathway	1.01505			Nucleotide excision repair	1.73493	Homologous recombination	0.463485	Type II diabetes mellitus	0.556058	Arrhythmogenic right ventricular cardiomyopathy (ARVC)	0.557995	Non-homologous end-joining	0.866025	Neuroactive ligand-receptor interaction	0.136645	AMPK signaling pathway	0.245715	Purine metabolism	1.16282
Cysteine and methionine metabolism	0.696057	Hippo signaling pathway	0.38273	Progesterone-mediated oocyte maturation	2.04046	Progesterone-mediated oocyte maturation	2.04046	Fructose and mannose metabolism	0.315616	Primary immunodeficiency	0.974468			Arginine biosynthesis	1.71687	Spliceosome	0.450805	HIF-1 signaling pathway	0.53282	Insulin resistance	0.539306	Spliceosome	0.812839	Intestinal immune network for IgA production	0.136045	Oxidative phosphorylation	0.209713	Allograft rejection	1.12156
Fatty acid degradation	0.696057	Arrhythmogenic right ventricular cardiomyopathy (ARVC)	0.37342	Neurotrophin signaling pathway	2.02046	Neurotrophin signaling pathway	2.02046	Glycosaminoglycan biosynthesis	0.302244	Osteoclast differentiation	0.955404			One carbon pool by folate	1.71687	Tuberculosis	0.438431	Cholesterol metabolism	0.531282	TNF signaling pathway	0.539306	Fatty acid biosynthesis	0.742306	Nucleotide excision repair	0.136045	Purine metabolism	0.201729	Ubiquitin mediated proteolysis	1.11331
Linoleic acid metabolism	0.696057	AMPK signaling pathway	0.358524	FoxO signaling pathway	1.98081	FoxO signaling pathway	1.98081	HIF-1 signaling pathway	0.300361	Alanine, aspartate and glutamate metabolism	0.92198			Regulation of lipolysis in adipocytes	1.69868	Arachidonic acid metabolism	0.422079	Malaria	0.531282	Adrenergic signaling in cardiomyocytes	0.525301	Propanoate metabolism	0.729662	Hedgehog signaling pathway	0.127441	Signaling pathways regulating pluripotency of stem cells	0.197874	Human cytomegalovirus infection	1.10122
N-Glycan biosynthesis	0.696057	Thyroid hormone synthesis	0.354114	Pentose phosphate pathway	1.93182	Pentose phosphate pathway	1.93182	Primary immunodeficiency	0.289194	Thyroid cancer	0.92198			Apelin signaling pathway	1.58448	Steroid hormone biosynthesis	0.422079	Cysteine and methionine metabolism	0.507905	Tight junction	0.519216	Metabolism of xenobiotics by cytochrome P450	0.71285	Peroxisome	0.123261	Ubiquitin mediated proteolysis	0.194107	Mucin type O-glycan biosynthesis	1.09997
Amyotrophic lateral sclerosis (ALS)	0.640104	Pantothenate and CoA biosynthesis	0.34075	Fatty acid biosynthesis	1.90866	Fatty acid biosynthesis	1.90866	Pantothenate and CoA biosynthesis	0.27977	Tuberculosis	0.913111			Ubiquitin mediated proteolysis	1.58448	Intestinal immune network for IgA production	0.415546	Fatty acid degradation	0.507905	Autophagy	0.514163	Glycolysis / Gluconeogenesis	0.677899	Rheumatoid arthritis	0.123261	Insulin signaling pathway	0.190425	Protein export	1.09997
Human papillomavirus infection	0.616257	TNF signaling pathway	0.335099	Aldosterone synthesis and secretion	1.90301	Aldosterone synthesis and secretion	1.90301	Cell cycle	0.272255	Relaxin signaling pathway	0.894917			Insulin signaling pathway	1.53893	Nucleotide excision repair	0.415546	Linoleic acid metabolism	0.507905	Influenza A	0.504277	Galactose metabolism	0.67117	PPAR signaling pathway	0.117987	Vascular smooth muscle contraction	0.186827	RNA polymerase	1.09997
Human immunodeficiency virus 1 infection	0.606417	Ovarian steroidogenesis	0.310102	Longevity regulating pathway	1.90301	Longevity regulating pathway	1.90301	Parathyroid hormone synthesis, secretion and action	0.262213	ErbB signaling pathway	0.883126			Legionellosis	1.52777	Antigen processing and presentation	0.408654	Amyotrophic lateral sclerosis (ALS)	0.464959	Nitrogen metabolism	0.503356	PPAR signaling pathway	0.667785	Cytokine-cytokine receptor interaction	0.115772	Measles	0.17322	Graft-versus-host disease	1.07994
Oocyte meiosis	0.586501	One carbon pool by folate	0.298808	Terpenoid backbone biosynthesis	1.88294	Terpenoid backbone biosynthesis	1.88294	Regulation of lipolysis in adipocytes	0.246932	Aldosterone-regulated sodium reabsorption	0.873203			Glycosphingolipid biosynthesis	1.52759	GnRH signaling pathway	0.408654	TNF signaling pathway	0.45548	Retrograde endocannabinoid signaling	0.493391	Insulin signaling pathway	0.651132	Hypertrophic cardiomyopathy (HCM)	0.112956	Breast cancer	0.163784	Longevity regulating pathway	1.0596
Endocrine and other factor-regulated calcium reabsorption	0.566653	African trypanosomiasis	0.289294	Rap1 signaling pathway	1.84704	Rap1 signaling pathway	1.84704	African trypanosomiasis	0.223671	Transcriptional misregulation in cancer	0.836768			mTOR signaling pathway	1.49134	Progesterone-mediated oocyte maturation	0.408654	Influenza A	0.446463	FoxO signaling pathway	0.480376	Vascular smooth muscle contraction	0.630806	MAPK signaling pathway	0.110768	Phospholipase D signaling pathway	0.157831	Apoptosis	1.04341
Valine, leucine and isoleucine degradation	0.544607	Non-alcoholic fatty liver disease (NAFLD)	0.274991	Basal transcription factors	1.73957	Basal transcription factors	1.73957	VEGF signaling pathway	0.216111	Gap junction	0.832398			Circadian entrainment	1.47846	Protein digestion and absorption	0.408654	Cholinergic synapse	0.421733	Regulation of lipolysis in adipocytes	0.479301	Pancreatic secretion	0.612258	Wnt signaling pathway	0.108741	Gastric cancer	0.154951	Phagosome	1.04198
VEGF signaling pathway	0.503719	Salivary secretion	0.272038	Huntington disease	1.64263	Huntington disease	1.64263	Axon guidance	0.21237	Dopaminergic synapse	0.820973			Prolactin signaling pathway	1.47395	TGF-beta signaling pathway	0.395717	Viral carcinogenesis	0.416615	Alanine, aspartate and glutamate metabolism	0.469957	Amyotrophic lateral sclerosis (ALS)	0.578476	Ether lipid metabolism	0.10519	Retrograde endocannabinoid signaling	0.154951	Fluid shear stress and atherosclerosis	0.999538
Endometrial cancer	0.503719	Ribosome biogenesis in eukaryotes	0.272003	Wnt signaling pathway	1.61499	Wnt signaling pathway	1.61499	Fat digestion and absorption	0.205643	Fc gamma R-mediated phagocytosis	0.808356			SNARE interactions in vesicular transport	1.44328	Apelin signaling pathway	0.388794	Drug metabolism	0.411131	Drug metabolism	0.464442	p53 signaling pathway	0.555508	Complement and coagulation cascades	0.10357	Oxytocin signaling pathway	0.144032	Glycolysis / Gluconeogenesis	0.965954
Calcium signaling pathway	0.486648	cGMP-PKG signaling pathway	0.248254	Gap junction	1.56034	Gap junction	1.56034	Glycine, serine and threonine metabolism	0.205643	Th1 and Th2 cell differentiation	0.808356			Insulin secretion	1.44306	Small cell lung cancer	0.383247	Glutamatergic synapse	0.411131	Pantothenate and CoA biosynthesis	0.442114	AMPK signaling pathway	0.55155	AMPK signaling pathway	0.102239	Hippo signaling pathway	0.131628	Long-term potentiation	0.965954
Inflammatory bowel disease (IBD)	0.484746	Homologous recombination	0.24681	Vascular smooth muscle contraction	1.53422	Vascular smooth muscle contraction	1.53422	Lysine degradation	0.202251	Cellular senescence	0.808219			Melanogenesis	1.42517	Glycosphingolipid biosynthesis	0.373692	Thyroid hormone signaling pathway	0.400835	mTOR signaling pathway	0.435159	Protein processing in endoplasmic reticulum	0.54242	Steroid hormone biosynthesis	0.0991942	Wnt signaling pathway	0.1293	Circadian rhythm	0.958432
Human cytomegalovirus infection	0.476246	Signaling pathways regulating pluripotency of stem cells	0.23523	Glycosylphosphatidylinositol (GPI)-anchor biosynthesis	1.5222	Glycosylphosphatidylinositol (GPI)-anchor biosynthesis	1.5222	Alcoholism	0.197395	Glycine, serine and threonine metabolism	0.785479			Vitamin B6 metabolism	1.37061	Chemical carcinogenesis	0.359631	Regulation of lipolysis in adipocytes	0.392017	Circadian entrainment	0.392134	Dilated cardiomyopathy (DCM)	0.539022	Protein processing in endoplasmic reticulum	0.0991671	Hepatitis C	0.1293	Amoebiasis	0.952211
Inflammatory mediator regulation of TRP channels	0.456383	Basal cell carcinoma	0.213912	Primary bile acid biosynthesis	1.40976	Primary bile acid biosynthesis	1.40976	Salmonella infection	0.193814	Human immunodeficiency virus 1 infection	0.768535			Fluid shear stress and atherosclerosis	1.36936	Hematopoietic cell lineage	0.359631	Valine, leucine and isoleucine degradation	0.392017	Toll-like receptor signaling pathway	0.392134	GnRH signaling pathway	0.539022	ABC transporters	0.0987979	JAK-STAT signaling pathway	0.120455	Fc epsilon RI signaling pathway	0.931264
Cytosolic DNA-sensing pathway	0.44945	Aldosterone synthesis and secretion	0.212051	Insulin resistance	1.40429	Insulin resistance	1.40429	Bladder cancer	0.189205	Insulin signaling pathway	0.753915			Th17 cell differentiation	1.32447	Measles	0.335948	Ovarian steroidogenesis	0.376078	Tuberculosis	0.375977	Inflammatory mediator regulation of TRP channels	0.532843	Sphingolipid metabolism	0.0987979	RNA transport	0.114281	RIG-I-like receptor signaling pathway	0.931264
Basal cell carcinoma	0.41735	Intestinal immune network for IgA production	0.21116	mTOR signaling pathway	1.39352	mTOR signaling pathway	1.39352	FoxO signaling pathway	0.186844	IL-17 signaling pathway	0.720159			DNA replication	1.23457	Tryptophan metabolism	0.320311	VEGF signaling pathway	0.360943	Cushing syndrome	0.371727	Bile secretion	0.52877	Alcoholism	0.0965145	Influenza A	0.112305	Parathyroid hormone synthesis, secretion and action	0.927362
Focal adhesion	0.410912	Proximal tubule bicarbonate reclamation	0.205918	Ovarian steroidogenesis	1.36602	Ovarian steroidogenesis	1.36602	Glycerophospholipid metabolism	0.184061	MAPK signaling pathway	0.713232			Renin secretion	1.22978	Choline metabolism in cancer	0.307495	Neurotrophin signaling pathway	0.344908	Neurotrophin signaling pathway	0.357712	DNA replication	0.52622	Dilated cardiomyopathy (DCM)	0.095015	Ribosome	0.108471	Adrenergic signaling in cardiomyocytes	0.898541
FoxO signaling pathway	0.408529	Glutathione metabolism	0.201236	GABAergic synapse	1.30931	GABAergic synapse	1.30931	Mismatch repair	0.165863	Fluid shear stress and atherosclerosis	0.692997			Other types of O-glycan biosynthesis	1.22421	Toll-like receptor signaling pathway	0.307495	Transcriptional misregulation in cancer	0.3343	Aldosterone synthesis and secretion	0.346202	Fructose and mannose metabolism	0.52622	Malaria	0.0928489	Hepatocellular carcinoma	0.106611	Acute myeloid leukemia	0.898079
Central carbon metabolism in cancer	0.402385	Rheumatoid arthritis	0.198838	VEGF signaling pathway	1.28792	VEGF signaling pathway	1.28792	Other types of O-glycan biosynthesis	0.165863	Systemic lupus erythematosus	0.692997			Salivary secretion	1.12424	Cholesterol metabolism	0.304648	Cellular senescence	0.321817	Longevity regulating pathway	0.346202	Insulin resistance	0.506292	Retinol metabolism	0.0910231	cGMP-PKG signaling pathway	0.104788	Type I diabetes mellitus	0.898079
Glutathione metabolism	0.402385	Hedgehog signaling pathway	0.195502	Cortisol synthesis and secretion	1.26871	Cortisol synthesis and secretion	1.26871	Natural killer cell mediated cytotoxicity	0.158989	Neuroactive ligand-receptor interaction	0.688591			Gastric cancer	1.11587	Melanogenesis	0.298127	Sphingolipid signaling pathway	0.320311	Th17 cell differentiation	0.346202	Thyroid hormone synthesis	0.503399	Autophagy	0.0888019	Necroptosis	0.097845	Insulin resistance	0.857171
Estrogen signaling pathway	0.391022	PPAR signaling pathway	0.18876	Th17 cell differentiation	1.25179	Th17 cell differentiation	1.25179	Hepatocellular carcinoma	0.158481	Nucleotide excision repair	0.674457			Phenylalanine metabolism	1.10031	Phospholipase D signaling pathway	0.29782	Cytosolic DNA-sensing pathway	0.319871	Chagas disease (American trypanosomiasis)	0.332141	Renin-angiotensin system	0.486297	Tight junction	0.0877019	Tuberculosis	0.0945728	Galactose metabolism	0.840277
Aminoacyl-tRNA biosynthesis	0.374423	Parkinson disease	0.17944	Morphine addiction	1.19956	Morphine addiction	1.19956	T cell receptor signaling pathway	0.150627	Chemokine signaling pathway	0.657747			Chemical carcinogenesis	1.04613	Linoleic acid metabolism	0.289919	Glycerolipid metabolism	0.319871	Hepatitis B	0.327534	Selenocompound metabolism	0.486169	Arginine and proline metabolism	0.0873074	Axon guidance	0.0914256	beta-Alanine metabolism	0.840277
Non-small cell lung cancer	0.374423	Hypertrophic cardiomyopathy (HCM)	0.179203	HIF-1 signaling pathway	1.154	HIF-1 signaling pathway	1.154	Hedgehog signaling pathway	0.14794	Mineral absorption	0.642051			Tight junction	1.04229	MAPK signaling pathway	0.283903	Long-term depression	0.319871	Basal cell carcinoma	0.321273	Phospholipase D signaling pathway	0.47386	Cysteine and methionine metabolism	0.0873074	Transcriptional misregulation in cancer	0.086927	PI3K-Akt signaling pathway	0.834279
Purine metabolism	0.374369	Insulin secretion	0.179203	Inflammatory mediator regulation of TRP channels	1.12735	Inflammatory mediator regulation of TRP channels	1.12735	Mineral absorption	0.14794	Breast cancer	0.637568			Insulin resistance	0.989284	Th17 cell differentiation	0.280338	Platelet activation	0.312558	Platelet activation	0.308134	Influenza A	0.467647	Serotonergic synapse	0.0827765	Calcium signaling pathway	0.0786668	C-type lectin receptor signaling pathway	0.813755
Leishmaniasis	0.361354	Protein processing in endoplasmic reticulum	0.178578	Protein export	1.12334	Protein export	1.12334	Phenylalanine metabolism	0.146697	mRNA surveillance pathway	0.625526			Long-term potentiation	0.960884	Fanconi anemia pathway	0.276056	Allograft rejection	0.29568	Cellular senescence	0.305494	Regulation of lipolysis in adipocytes	0.455874	Fanconi anemia pathway	0.0821409	Olfactory transduction	0.0724754	Melanoma	0.806775
Long-term potentiation	0.361354	Long-term potentiation	0.167731	Gastric cancer	1.11098	Gastric cancer	1.11098	Terpenoid backbone biosynthesis	0.146697	Glycosphingolipid biosynthesis	0.611642			Ubiquinone and other terpenoid-quinone biosynthesis	0.922148	Chagas disease (American trypanosomiasis)	0.271893	Central carbon metabolism in cancer	0.284431	Intestinal immune network for IgA production	0.300952	Chemical carcinogenesis	0.454722	Amyotrophic lateral sclerosis (ALS)	0.0773202	Chemokine signaling pathway	0.0690041	Human papillomavirus infection	0.804575
Insulin signaling pathway	0.350884	Vitamin digestion and absorption	0.163065	RNA degradation	1.09109	RNA degradation	1.09109	Central carbon metabolism in cancer	0.145665	Glycerophospholipid metabolism	0.608412			Fc epsilon RI signaling pathway	0.913634	Oxytocin signaling pathway	0.264295	Glutathione metabolism	0.284431	Proximal tubule bicarbonate reclamation	0.273605	Cholinergic synapse	0.451845	Dopaminergic synapse	0.074512	Human papillomavirus infection	0.0653715	Cholinergic synapse	0.79299
Amphetamine addiction	0.348851	Fc epsilon RI signaling pathway	0.157906	ErbB signaling pathway	1.04055	ErbB signaling pathway	1.04055	Chagas disease (American trypanosomiasis)	0.136246	Human cytomegalovirus infection	0.598983			RIG-I-like receptor signaling pathway	0.913634	HIF-1 signaling pathway	0.263732	Glycolysis / Gluconeogenesis	0.253692	Th1 and Th2 cell differentiation	0.272866	Thyroid cancer	0.449847	Glycosaminoglycan biosynthesis	0.0728186	Rap1 signaling pathway	0.0569184	Oxytocin signaling pathway	0.791926
RIG-I-like receptor signaling pathway	0.348851	Steroid hormone biosynthesis	0.153379	Phenylalanine, tyrosine and tryptophan biosynthesis	1.03344	Phenylalanine, tyrosine and tryptophan biosynthesis	1.03344	PPAR signaling pathway	0.130746	AGE-RAGE signaling pathway in diabetic complications	0.545245			Glycosylphosphatidylinositol (GPI)-anchor biosynthesis	0.89552	Amyotrophic lateral sclerosis (ALS)	0.262997	Leishmaniasis	0.253692	Epstein-Barr virus infection	0.269613	Calcium signaling pathway	0.436579	Purine metabolism	0.0719485	Kaposi sarcoma-associated herpesvirus infection	0.0509747	SNARE interactions in vesicular transport	0.788418
Renal cell carcinoma	0.348851	Insulin resistance	0.146534	Parathyroid hormone synthesis, secretion and action	1.02131	Parathyroid hormone synthesis, secretion and action	1.02131	Vitamin digestion and absorption	0.130084	Tryptophan metabolism	0.530914			Proteoglycans in cancer	0.883775	Pathways in cancer	0.250439	Long-term potentiation	0.253692	Hepatocellular carcinoma	0.253864	Drug metabolism	0.435042	Glycerophospholipid metabolism	0.0705258	Pathways in cancer	0.0488179	Starch and sucrose metabolism	0.788418
Acute myeloid leukemia	0.336881	Malaria	0.134102	Fatty acid elongation	1.01858	Fatty acid elongation	1.01858	Non-small cell lung cancer	0.127907	Aldosterone synthesis and secretion	0.530677			MAPK signaling pathway	0.875996	Amoebiasis	0.248219	Dopaminergic synapse	0.245626	Non-alcoholic fatty liver disease (NAFLD)	0.251057	Human T-cell leukemia virus 1 infection	0.434863	Prostate cancer	0.0705258	Thermogenesis	0.0404262	Glutamatergic synapse	0.772826
Apoptosis	0.336159	Morphine addiction	0.131318	Ferroptosis	1.00967	Ferroptosis	1.00967	Hepatitis C	0.122494	Glucagon signaling pathway	0.530677			Cortisol synthesis and secretion	0.868863	Toxoplasmosis	0.233716	Purine metabolism	0.239868	Fc epsilon RI signaling pathway	0.243239	Ovarian steroidogenesis	0.429901	Signaling pathways regulating pluripotency of stem cells	0.0694748	Human immunodeficiency virus 1 infection	0.0363495	Glioma	0.726419
Measles	0.315366	Arginine and proline metabolism	0.124544	Nicotine addiction	1.00967	Nicotine addiction	1.00967	Leishmaniasis	0.119884	cAMP signaling pathway	0.519409			ErbB signaling pathway	0.861166	cAMP signaling pathway	0.224563	Apelin signaling pathway	0.228795	RIG-I-like receptor signaling pathway	0.243239	Hepatocellular carcinoma	0.427671	Endocrine and other factor-regulated calcium reabsorption	0.0646776	Human T-cell leukemia virus 1 infection	0.0327199	Pertussis	0.701787
Arrhythmogenic right ventricular cardiomyopathy (ARVC)	0.303903	N-Glycan biosynthesis	0.124544	cAMP signaling pathway	0.994338	cAMP signaling pathway	0.994338	Fluid shear stress and atherosclerosis	0.117172	Chagas disease (American trypanosomiasis)	0.516561			Cushing syndrome	0.856421	PI3K-Akt signaling pathway	0.222856	Vascular smooth muscle contraction	0.218287	Renal cell carcinoma	0.243239	Pyrimidine metabolism	0.405536	NF-kappa B signaling pathway	0.0571766	Human cytomegalovirus infection	0.0282043	DNA replication	0.696717
B cell receptor signaling pathway	0.303903	Alzheimer disease	0.114992	Fluid shear stress and atherosclerosis	0.958459	Fluid shear stress and atherosclerosis	0.958459	Asthma	0.115628	Cholesterol metabolism	0.507077			Folate biosynthesis	0.81058	Valine, leucine and isoleucine degradation	0.217728	Apoptosis	0.213235	Antigen processing and presentation	0.237096	Glycerophospholipid metabolism	0.400501	Th17 cell differentiation	0.0571766	Endocytosis	0.022983	Fructose and mannose metabolism	0.696717
Prolactin signaling pathway	0.303903	Necroptosis	0.110804	Spliceosome	0.941147	Spliceosome	0.941147	alpha-Linolenic acid metabolism	0.115628	Cushing syndrome	0.498859			Relaxin signaling pathway	0.799305	C-type lectin receptor signaling pathway	0.207448	Arrhythmogenic right ventricular cardiomyopathy (ARVC)	0.210942	Progesterone-mediated oocyte maturation	0.237096	cAMP signaling pathway	0.399303	Fluid shear stress and atherosclerosis	0.0563452	Cytokine-cytokine receptor interaction	0.0165353	Synaptic vesicle cycle	0.678144
PI3K-Akt signaling pathway	0.301187	Bacterial invasion of epithelial cells	0.110259	Bladder cancer	0.934353	Bladder cancer	0.934353	AMPK signaling pathway	0.110114	Hippo signaling pathway	0.498859			Breast cancer	0.7784	Endometrial cancer	0.198645	Bile secretion	0.210942	ABC transporters	0.211481	African trypanosomiasis	0.38599	Systemic lupus erythematosus	0.0563452	Herpes simplex virus 1 infection	0.00249161	Renin-angiotensin system	0.656088
Breast cancer	0.296015	Mucin type O-glycan biosynthesis	0.105093	Tight junction	0.930625	Tight junction	0.930625	Protein processing in endoplasmic reticulum	0.108578	Pancreatic secretion	0.489622			Th1 and Th2 cell differentiation	0.754587	Legionellosis	0.198645	Prolactin signaling pathway	0.210942	Tryptophan metabolism	0.211481	Apelin signaling pathway	0.364346	Chagas disease (American trypanosomiasis)	0.0548415			Autoimmune thyroid disease	0.655442
Bacterial invasion of epithelial cells	0.284116	Ubiquitin mediated proteolysis	0.103236	Arginine biosynthesis	0.930532	Arginine biosynthesis	0.930532	Arachidonic acid metabolism	0.104483	Arginine and proline metabolism	0.484593			Arrhythmogenic right ventricular cardiomyopathy (ARVC)	0.748018	VEGF signaling pathway	0.198645	Inositol phosphate metabolism	0.203468	Glutamatergic synapse	0.210765	Glycine, serine and threonine metabolism	0.357997	Measles	0.0544157			Tight junction	0.605262
Gastric acid secretion	0.284116	Cushing syndrome	0.0995752	Glutathione metabolism	0.908559	Glutathione metabolism	0.908559	Notch signaling pathway	0.0992536	Cysteine and methionine metabolism	0.484593			Estrogen signaling pathway	0.722486	Glutamatergic synapse	0.195552	Thyroid hormone synthesis	0.203468	Adipocytokine signaling pathway	0.206321	Nicotine addiction	0.357997	Endometrial cancer	0.0543172			cAMP signaling pathway	0.598262
Phospholipase D signaling pathway	0.283857	Renin secretion	0.0979118	Renin secretion	0.881209	Renin secretion	0.881209	Protein digestion and absorption	0.0987909	Kaposi sarcoma-associated herpesvirus infection	0.477843			Colorectal cancer	0.722176	Tight junction	0.194551	Parkinson disease	0.198836	Amino sugar and nucleotide sugar metabolism	0.197392	Melanogenesis	0.352882	Pyrimidine metabolism	0.0543172			Influenza A	0.593017
Gastric cancer	0.27799	Synaptic vesicle cycle	0.0922804	Cushing syndrome	0.827051	Cushing syndrome	0.827051	IL-17 signaling pathway	0.0934093	Regulation of actin cytoskeleton	0.469962			Endometrial cancer	0.699813	Influenza A	0.190061	Gastric acid secretion	0.19631	Cholesterol metabolism	0.197392	Chagas disease (American trypanosomiasis)	0.311018	Adrenergic signaling in cardiomyocytes	0.0473435			Platelet activation	0.585364
Herpes simplex virus 1 infection	0.277034	Salmonella infection	0.0869808	Vitamin B6 metabolism	0.812594	Vitamin B6 metabolism	0.812594	Adipocytokine signaling pathway	0.0926426	Parathyroid hormone synthesis, secretion and action	0.464301			Basal transcription factors	0.685512	Glycerolipid metabolism	0.173639	Kaposi sarcoma-associated herpesvirus infection	0.180576	Adherens junction	0.195371	Fluid shear stress and atherosclerosis	0.306321	Cytosolic DNA-sensing pathway	0.0457781			Aldosterone-regulated sodium reabsorption	0.583646
Non-alcoholic fatty liver disease (NAFLD)	0.272258	Melanogenesis	0.0868617	Cholinergic synapse	0.799317	Cholinergic synapse	0.799317	Maturity onset diabetes of the young	0.0919413	JAK-STAT signaling pathway	0.451223			Gastric acid secretion	0.677434	Neurotrophin signaling pathway	0.159459	Phospholipase D signaling pathway	0.177157	B cell receptor signaling pathway	0.195371	Transcriptional misregulation in cancer	0.298179	Toxoplasmosis	0.0445742			Cell adhesion molecules (CAMs)	0.569319
Chronic myeloid leukemia	0.265888	Regulation of lipolysis in adipocytes	0.0805731	Salmonella infection	0.794577	Salmonella infection	0.794577	Cysteine and methionine metabolism	0.0917645	Cell adhesion molecules (CAMs)	0.40053			RNA transport	0.675538	Central carbon metabolism in cancer	0.15229	Autoimmune thyroid disease	0.170527	Axon guidance	0.190013	Glutathione metabolism	0.287439	Gastric cancer	0.0441636			Hepatocellular carcinoma	0.557853
Pertussis	0.265888	Measles	0.0798621	Platelet activation	0.791333	Platelet activation	0.791333	Influenza A	0.0886655	Hepatocellular carcinoma	0.392702			Protein export	0.667945	Lysosome	0.146277	Cardiac muscle contraction	0.170527	Natural killer cell mediated cytotoxicity	0.178671	Platelet activation	0.286782	TNF signaling pathway	0.0410487			RNA degradation	0.554551
Renin secretion	0.265888	Glucagon signaling pathway	0.0783384	Hedgehog signaling pathway	0.7431	Hedgehog signaling pathway	0.7431	Arrhythmogenic right ventricular cardiomyopathy (ARVC)	0.0868855	Endocrine and other factor-regulated calcium reabsorption	0.389354			RNA polymerase	0.667945	Axon guidance	0.1439	Salivary secretion	0.170527	Proteoglycans in cancer	0.177411	Cellular senescence	0.280626	Allograft rejection	0.0409177			African trypanosomiasis	0.551295
Synaptic vesicle cycle	0.257311	Endometrial cancer	0.0698719	Non-alcoholic fatty liver disease (NAFLD)	0.726504	Non-alcoholic fatty liver disease (NAFLD)	0.726504	Bile secretion	0.0868855	Necroptosis	0.355978			Hedgehog signaling pathway	0.638984	Platelet activation	0.14215	Salmonella infection	0.170527	Human T-cell leukemia virus 1 infection	0.174104	Amoebiasis	0.27418	Basal cell carcinoma	0.0409177			cGMP-PKG signaling pathway	0.546633
Hippo signaling pathway	0.230876	VEGF signaling pathway	0.0698719	Renal cell carcinoma	0.722237	Renal cell carcinoma	0.722237	Melanoma	0.0868855	Natural killer cell mediated cytotoxicity	0.349294			Toxoplasmosis	0.599975	Metabolism of xenobiotics by cytochrome P450	0.139773	Wnt signaling pathway	0.138013	Glycerophospholipid metabolism	0.17115	Mismatch repair	0.263226	Mitophagy	0.0409177			Regulation of actin cytoskeleton	0.538357
RNA degradation	0.212355	Galactose metabolism	0.0696584	Legionellosis	0.642082	Legionellosis	0.642082	Amyotrophic lateral sclerosis (ALS)	0.0785312	Endometrial cancer	0.343395			Fatty acid biosynthesis	0.552994	Non-small cell lung cancer	0.139773	Gap junction	0.130037	Glioma	0.166033	Other types of O-glycan biosynthesis	0.263226	Glutathione metabolism	0.0387038			Ferroptosis	0.521215
Tight junction	0.19636	Lysine degradation	0.0650945	Prion diseases	0.636837	Prion diseases	0.636837	Glutamatergic synapse	0.0782742	Pyrimidine metabolism	0.343395			Inflammatory mediator regulation of TRP channels	0.533057	Glycolysis / Gluconeogenesis	0.133969	Hypertrophic cardiomyopathy (HCM)	0.130037	Ascorbate and aldarate metabolism	0.160119	Non-small cell lung cancer	0.256777	Graft-versus-host disease	0.0387038			Nicotine addiction	0.521215
Gap junction	0.193452	Thermogenesis	0.0637551	Other types of O-glycan biosynthesis	0.635496	Other types of O-glycan biosynthesis	0.635496	Thyroid hormone signaling pathway	0.0744089	Lysine degradation	0.329594			Basal cell carcinoma	0.526113	Leishmaniasis	0.133969	Hepatitis B	0.129045	Collecting duct acid secretion	0.160119	Autophagy	0.237215	Oxytocin signaling pathway	0.0384356			Tyrosine metabolism	0.521215
Hypertrophic cardiomyopathy (HCM)	0.193452	Starch and sucrose metabolism	0.0630737	Adherens junction	0.575037	Adherens junction	0.575037	Oocyte meiosis	0.0707309	Glycerolipid metabolism	0.303995			Wnt signaling pathway	0.515587	Fc epsilon RI signaling pathway	0.128446	JAK-STAT signaling pathway	0.126198	Maturity onset diabetes of the young	0.160119	RIG-I-like receptor signaling pathway	0.229571	Cholinergic synapse	0.0362946			Alzheimer disease	0.514397
Insulin secretion	0.193452	Hepatocellular carcinoma	0.0615321	Arrhythmogenic right ventricular cardiomyopathy (ARVC)	0.575037	Arrhythmogenic right ventricular cardiomyopathy (ARVC)	0.575037	Prostate cancer	0.0667435	Long-term depression	0.303995			mRNA surveillance pathway	0.509184	Renal cell carcinoma	0.128446	Fc gamma R-mediated phagocytosis	0.125815	JAK-STAT signaling pathway	0.160068	GABAergic synapse	0.222206	Drug metabolism	0.03484			Relaxin signaling pathway	0.504939
Th1 and Th2 cell differentiation	0.187604	Pentose and glucuronate interconversions	0.0571813	B cell receptor signaling pathway	0.575037	B cell receptor signaling pathway	0.575037	Choline metabolism in cancer	0.0596636	Platelet activation	0.2931			Tuberculosis	0.485464	Acute myeloid leukemia	0.123187	Th1 and Th2 cell differentiation	0.125815	Glycosaminoglycan biosynthesis	0.1505	Ether lipid metabolism	0.215502	Chemokine signaling pathway	0.034824			Gap junction	0.502779
Fc gamma R-mediated phagocytosis	0.187604	Prion diseases	0.0571813	Bile secretion	0.575037	Bile secretion	0.575037	Neurotrophin signaling pathway	0.0548504	AMPK signaling pathway	0.285938			Glutamatergic synapse	0.473123	Neuroactive ligand-receptor interaction	0.11859	Complement and coagulation cascades	0.121753	Cardiac muscle contraction	0.141268	Estrogen signaling pathway	0.203733	Non-small cell lung cancer	0.0346615			Porphyrin and chlorophyll metabolism	0.493206
Colorectal cancer	0.181966	Cytosolic DNA-sensing pathway	0.0565417	Prolactin signaling pathway	0.575037	Prolactin signaling pathway	0.575037	beta-Alanine metabolism	0.0534326	Basal cell carcinoma	0.280804			Protein processing in endoplasmic reticulum	0.468385	Serotonergic synapse	0.11656	Tight junction	0.118054	Salmonella infection	0.141268	Small cell lung cancer	0.202134	Thyroid hormone signaling pathway	0.0334457			Viral myocarditis	0.48679
Complement and coagulation cascades	0.181966	Glycerolipid metabolism	0.0565417	Cocaine addiction	0.551314	Cocaine addiction	0.551314	Glucagon signaling pathway	0.0504188	Mitophagy	0.280804			Galactose metabolism	0.462361	Adipocytokine signaling pathway	0.113403	Steroid hormone biosynthesis	0.117842	Sphingolipid signaling pathway	0.139423	Cocaine addiction	0.200902	Glycolysis / Gluconeogenesis	0.0328162			Colorectal cancer	0.471389
cGMP-PKG signaling pathway	0.177698	Long-term depression	0.0565417	Tryptophan metabolism	0.551314	Tryptophan metabolism	0.551314	Endometrial cancer	0.0496159	Calcium signaling pathway	0.276745			beta-Alanine metabolism	0.462361	p53 signaling pathway	0.113403	Antigen processing and presentation	0.114077	cAMP signaling pathway	0.138636	Tryptophan metabolism	0.200902	Leishmaniasis	0.0328162			Complement and coagulation cascades	0.471389
Steroid hormone biosynthesis	0.176529	mTOR signaling pathway	0.0518152	Type II diabetes mellitus	0.551314	Type II diabetes mellitus	0.551314	Legionellosis	0.0496159	Central carbon metabolism in cancer	0.270024			Adrenergic signaling in cardiomyocytes	0.449403	Estrogen signaling pathway	0.110195	Dilated cardiomyopathy (DCM)	0.114077	Breast cancer	0.134964	Glutamatergic synapse	0.196003	Long-term potentiation	0.0328162			Basal transcription factors	0.442707
Arachidonic acid metabolism	0.176529	Viral myocarditis	0.0512434	Human T-cell leukemia virus 1 infection	0.543459	Human T-cell leukemia virus 1 infection	0.543459	Lysosome	0.0470566	Autophagy	0.259191			Aminoacyl-tRNA biosynthesis	0.444512	B cell receptor signaling pathway	0.108851	GABAergic synapse	0.114077	Fatty acid elongation	0.131114	alpha-Linolenic acid metabolism	0.189106	Cushing syndrome	0.0323154			Carbohydrate digestion and absorption	0.442707
Antigen processing and presentation	0.171284	Mitophagy	0.04916	Phosphatidylinositol signaling system	0.535998	Phosphatidylinositol signaling system	0.535998	Sphingolipid signaling pathway	0.0470566	Aminoacyl-tRNA biosynthesis	0.249941			N-Glycan biosynthesis	0.423839	Melanoma	0.108851	Progesterone-mediated oocyte maturation	0.114077	AMPK signaling pathway	0.128344	Amino sugar and nucleotide sugar metabolism	0.187384	Acute myeloid leukemia	0.0294401			Progesterone-mediated oocyte maturation	0.442248
Dilated cardiomyopathy (DCM)	0.171284	Complement and coagulation cascades	0.0483309	Glycerolipid metabolism	0.529997	Glycerolipid metabolism	0.529997	Prion diseases	0.0434267	Metabolism of xenobiotics by cytochrome P450	0.249941			T cell receptor signaling pathway	0.40967	Pancreatic cancer	0.0964102	IL-17 signaling pathway	0.110451	HIF-1 signaling pathway	0.123763	Notch signaling pathway	0.187384	Type I diabetes mellitus	0.0294401			IL-17 signaling pathway	0.428461
Protein digestion and absorption	0.171284	Taste transduction	0.0483309	Long-term depression	0.529997	Long-term depression	0.529997	ErbB signaling pathway	0.0404744	Amphetamine addiction	0.231648			Primary bile acid biosynthesis	0.408479	Human cytomegalovirus infection	0.0935452	Retinol metabolism	0.110451	Gastric cancer	0.120461	Fatty acid degradation	0.174859	Arrhythmogenic right ventricular cardiomyopathy (ARVC)	0.0250657			Retinol metabolism	0.428461
Alzheimer disease	0.167439	Nicotinate and nicotinamide metabolism	0.0471552	Amino sugar and nucleotide sugar metabolism	0.512179	Amino sugar and nucleotide sugar metabolism	0.512179	Amoebiasis	0.0402658	Alcoholism	0.22869			Influenza A	0.39874	Vascular smooth muscle contraction	0.0932358	cGMP-PKG signaling pathway	0.105709	Ovarian steroidogenesis	0.115469	Linoleic acid metabolism	0.174859	Bile secretion	0.0250657			Mineral absorption	0.419914
Retinol metabolism	0.166223	Cholinergic synapse	0.0443508	Toll-like receptor signaling pathway	0.511111	Toll-like receptor signaling pathway	0.511111	Glycerolipid metabolism	0.0395835	Focal adhesion	0.22869			Renal cell carcinoma	0.397629	Alcoholism	0.0931783	Alzheimer disease	0.0989723	Amoebiasis	0.112835	Fanconi anemia pathway	0.163244	Melanoma	0.0250657			Morphine addiction	0.415167
Tuberculosis	0.157824	Dilated cardiomyopathy (DCM)	0.0429979	Th1 and Th2 cell differentiation	0.499398	Th1 and Th2 cell differentiation	0.499398	Toxoplasmosis	0.0359768	Acute myeloid leukemia	0.223111			Fanconi anemia pathway	0.396442	Apoptosis	0.0906912	mRNA surveillance pathway	0.0942011	VEGF signaling pathway	0.10816	Glioma	0.155957	Prolactin signaling pathway	0.0250657			Small cell lung cancer	0.415167
mRNA surveillance pathway	0.143422	GnRH signaling pathway	0.0429979	Arginine and proline metabolism	0.475986	Arginine and proline metabolism	0.475986	Gastric cancer	0.035664	Apelin signaling pathway	0.213668			Pentose and glucuronate interconversions	0.387724	Synaptic vesicle cycle	0.089025	Tuberculosis	0.0926918	Toxoplasmosis	0.102877	Pancreatic cancer	0.155957	Thyroid hormone synthesis	0.0237689			Vascular smooth muscle contraction	0.406206
Glycerophospholipid metabolism	0.139316	Protein digestion and absorption	0.0429979	Protein processing in endoplasmic reticulum	0.47516	Protein processing in endoplasmic reticulum	0.47516	Hypertrophic cardiomyopathy (HCM)	0.0356608	NOD-like receptor signaling pathway	0.204173			Signaling pathways regulating pluripotency of stem cells	0.369584	Salivary secretion	0.0855768	Prostate cancer	0.0912915	ErbB signaling pathway	0.102567	Ascorbate and aldarate metabolism	0.153436	Influenza A	0.0236583			Glycosphingolipid biosynthesis	0.398581
Prostate cancer	0.139316	Alanine, aspartate and glutamate metabolism	0.0428885	alpha-Linolenic acid metabolism	0.444852	alpha-Linolenic acid metabolism	0.444852	Renin-angiotensin system	0.0354548	B cell receptor signaling pathway	0.199684			Neurotrophin signaling pathway	0.358404	Proteoglycans in cancer	0.0850907	Human cytomegalovirus infection	0.0891945	Inflammatory bowel disease (IBD)	0.101344	Butanoate metabolism	0.153436	Platelet activation	0.0222974			Chemical carcinogenesis	0.389975
Cellular senescence	0.137644	Thyroid cancer	0.0428885	Viral carcinogenesis	0.422065	Viral carcinogenesis	0.422065	Viral carcinogenesis	0.0349164	Bile secretion	0.199684			Nitrogen metabolism	0.354095	NOD-like receptor signaling pathway	0.08132	Axon guidance	0.0887417	Serotonergic synapse	0.100065	Collecting duct acid secretion	0.153436	Hepatocellular carcinoma	0.0213238			Human immunodeficiency virus 1 infection	0.37324
Phosphatidylinositol signaling system	0.135347	Glutamatergic synapse	0.04211	Influenza A	0.396634	Influenza A	0.396634	Autophagy	0.0345752	Melanoma	0.199684			p53 signaling pathway	0.336798	Breast cancer	0.0768951	Toll-like receptor signaling pathway	0.0857757	Biosynthesis of unsaturated fatty acids	0.0983247	Chronic myeloid leukemia	0.147661	Renin secretion	0.0202956			Measles	0.369278
Neuroactive ligand-receptor interaction	0.132557	IL-17 signaling pathway	0.0405584	Metabolism of xenobiotics by cytochrome P450	0.386043	Metabolism of xenobiotics by cytochrome P450	0.386043	Basal cell carcinoma	0.0340876	Apoptosis	0.198944			Pathways in cancer	0.333335	Adrenergic signaling in cardiomyocytes	0.074821	Melanogenesis	0.0831613	Galactose metabolism	0.0983247	Choline metabolism in cancer	0.145318	Human cytomegalovirus infection	0.0199595			Prostate cancer	0.355396
Glucagon signaling pathway	0.120738	Retinol metabolism	0.0405584	Pancreatic secretion	0.383845	Pancreatic secretion	0.383845	Viral myocarditis	0.0334746	Inositol phosphate metabolism	0.192539			Vascular smooth muscle contraction	0.330889	Gastric cancer	0.0708482	AGE-RAGE signaling pathway in diabetic complications	0.0806374	Pentose phosphate pathway	0.0983247	Circadian entrainment	0.145318	Osteoclast differentiation	0.0197619			Toll-like receptor signaling pathway	0.334284
NF-kappa B signaling pathway	0.120738	Aldosterone-regulated sodium reabsorption	0.0390451	Glycine, serine and threonine metabolism	0.374302	Glycine, serine and threonine metabolism	0.374302	cGMP-PKG signaling pathway	0.0327636	Pancreatic cancer	0.179146			Nicotinate and nicotinamide metabolism	0.32655	ECM-receptor interaction	0.0704641	T cell receptor signaling pathway	0.0806374	Insulin secretion	0.09225	Glycosaminoglycan biosynthesis	0.142458	Autoimmune thyroid disease	0.0182867			Chemokine signaling pathway	0.331529
Chagas disease (American trypanosomiasis)	0.117379	Vascular smooth muscle contraction	0.0360169	Non-homologous end-joining	0.358761	Non-homologous end-joining	0.358761	Thyroid cancer	0.0320846	Chronic myeloid leukemia	0.172868			Renin-angiotensin system	0.32655	RNA degradation	0.0704641	Longevity regulating pathway	0.0782004	Starch and sucrose metabolism	0.0895791	Endocytosis	0.141919	Relaxin signaling pathway	0.0175212			Herpes simplex virus 1 infection	0.32942
Pancreatic secretion	0.11098	RIG-I-like receptor signaling pathway	0.0347777	Hepatocellular carcinoma	0.35548	Hepatocellular carcinoma	0.35548	Colorectal cancer	0.0314231	Cardiac muscle contraction	0.161077			Apoptosis	0.318885	ErbB signaling pathway	0.0678191	Huntington disease	0.0684996	Cytosolic DNA-sensing pathway	0.0890507	Synaptic vesicle cycle	0.139823	Spliceosome	0.0168335			Notch signaling pathway	0.325695
Proteoglycans in cancer	0.0974671	Endocytosis	0.0344312	Breast cancer	0.332738	Breast cancer	0.332738	mTOR signaling pathway	0.0294284	Retrograde endocannabinoid signaling	0.161064			B cell receptor signaling pathway	0.318751	Peroxisome	0.0678191	Parathyroid hormone synthesis, secretion and action	0.0672027	Long-term depression	0.0890507	Mucin type O-glycan biosynthesis	0.138613	Axon guidance	0.015614			MAPK signaling pathway	0.322445
NOD-like receptor signaling pathway	0.0938487	Ferroptosis	0.0324466	Endocrine and other factor-regulated calcium reabsorption	0.331384	Endocrine and other factor-regulated calcium reabsorption	0.331384	C-type lectin receptor signaling pathway	0.0287075	mTOR signaling pathway	0.146823			Sphingolipid signaling pathway	0.318072	Th1 and Th2 cell differentiation	0.0605324	Chemokine signaling pathway	0.0615624	Endocytosis	0.0880508	Cell cycle	0.13433	Phagosome	0.015614			Gastric cancer	0.320534
C-type lectin receptor signaling pathway	0.091552	Tyrosine metabolism	0.0324466	TNF signaling pathway	0.30181	TNF signaling pathway	0.30181	Antigen processing and presentation	0.0276913	ECM-receptor interaction	0.135521			Thyroid hormone synthesis	0.301706	Viral myocarditis	0.0605324	Insulin resistance	0.061448	Viral myocarditis	0.0874972	Th17 cell differentiation	0.126209	Estrogen signaling pathway	0.0155398			Retrograde endocannabinoid signaling	0.320534
Pathways in cancer	0.0893908	Fluid shear stress and atherosclerosis	0.0312262	Sphingolipid signaling pathway	0.291014	Sphingolipid signaling pathway	0.291014	Progesterone-mediated oocyte maturation	0.0276913	Human papillomavirus infection	0.132803			Thyroid cancer	0.30012	Colorectal cancer	0.0583026	Focal adhesion	0.0589981	C-type lectin receptor signaling pathway	0.0855246	Fatty acid elongation	0.125441	RNA degradation	0.0141408			T cell receptor signaling pathway	0.314584
Rap1 signaling pathway	0.0870342	cAMP signaling pathway	0.0288948	Tuberculosis	0.274309	Tuberculosis	0.274309	Nicotine addiction	0.0239065	Peroxisome	0.131			IL-17 signaling pathway	0.296091	Complement and coagulation cascades	0.0583026	PI3K-Akt signaling pathway	0.055426	Purine metabolism	0.0847211	HIF-1 signaling pathway	0.114898	Transcriptional misregulation in cancer	0.0140729			Fatty acid degradation	0.31013
Glutamatergic synapse	0.0867406	Prostate cancer	0.0285832	Endometrial cancer	0.267393	Endometrial cancer	0.267393	Tyrosine metabolism	0.0239065	Epstein-Barr virus infection	0.13052			Human T-cell leukemia virus 1 infection	0.292896	GABAergic synapse	0.0541138	Leukocyte transendothelial migration	0.0530454	Pentose and glucuronate interconversions	0.0817128	Relaxin signaling pathway	0.0958937	Vascular smooth muscle contraction	0.012235			Linoleic acid metabolism	0.31013
cAMP signaling pathway	0.083826	p53 signaling pathway	0.0283165	Pyrimidine metabolism	0.267393	Pyrimidine metabolism	0.267393	Amphetamine addiction	0.0235365	PPAR signaling pathway	0.126653			Small cell lung cancer	0.282156	Hepatitis C	0.0540605	Ribosome biogenesis in eukaryotes	0.0530454	Cholinergic synapse	0.0816649	ErbB signaling pathway	0.0957276	Gap junction	0.0121455			Proteoglycans in cancer	0.294559
Natural killer cell mediated cytotoxicity	0.0779588	Adherens junction	0.0264496	Melanoma	0.264651	Melanoma	0.264651	Fc epsilon RI signaling pathway	0.0235365	Thermogenesis	0.125789			Glioma	0.270393	Wnt signaling pathway	0.0540605	Oocyte meiosis	0.0515239	Signaling pathways regulating pluripotency of stem cells	0.0812617	Inflammatory bowel disease (IBD)	0.0955032	Viral myocarditis	0.0115489			mTOR signaling pathway	0.291915
AMPK signaling pathway	0.0632569	Bile secretion	0.0264496	Hypertrophic cardiomyopathy (HCM)	0.260051	Hypertrophic cardiomyopathy (HCM)	0.260051	Homologous recombination	0.0217088	Hypertrophic cardiomyopathy (HCM)	0.122475			Pancreatic cancer	0.270393	IL-17 signaling pathway	0.0521465	Rap1 signaling pathway	0.0477539	Mitophagy	0.0783322	mTOR signaling pathway	0.0944837	Taste transduction	0.0109834			Rap1 signaling pathway	0.261845
Thermogenesis	0.057832	Melanoma	0.0264496	Lysine degradation	0.249023	Lysine degradation	0.249023	Vascular smooth muscle contraction	0.0205742	Colorectal cancer	0.114589			Pertussis	0.256016	Retinol metabolism	0.0521465	MAPK signaling pathway	0.0445955	Base excision repair	0.0746242	Biosynthesis of unsaturated fatty acids	0.0938431	Arachidonic acid metabolism	0.0104471			Hippo signaling pathway	0.259933
Autophagy	0.0570978	Choline metabolism in cancer	0.0254398	Thyroid hormone synthesis	0.248549	Thyroid hormone synthesis	0.248549	Apoptosis	0.0195259	Complement and coagulation cascades	0.114589			VEGF signaling pathway	0.250771	Hepatitis B	0.0498825	Lysosome	0.0409595	Fructose and mannose metabolism	0.0746242	FoxO signaling pathway	0.0919265	GABAergic synapse	0.00993852			Hepatitis C	0.253997
Ras signaling pathway	0.0557465	Toll-like receptor signaling pathway	0.0254398	Glycosphingolipid biosynthesis	0.244701	Glycosphingolipid biosynthesis	0.244701	Adherens junction	0.0175503	Arachidonic acid metabolism	0.110868			Cholinergic synapse	0.243111	JAK-STAT signaling pathway	0.048566	Osteoclast differentiation	0.0365954	Leukocyte transendothelial migration	0.0744593	Gap junction	0.085973	GnRH signaling pathway	0.00993852			TNF signaling pathway	0.240689
Spliceosome	0.0542727	Platelet activation	0.0237571	AGE-RAGE signaling pathway in diabetic complications	0.241593	AGE-RAGE signaling pathway in diabetic complications	0.241593	B cell receptor signaling pathway	0.0175503	TGF-beta signaling pathway	0.103838			Inflammatory bowel disease (IBD)	0.235166	Viral carcinogenesis	0.0473414	Pathways in cancer	0.0346525	Thyroid hormone signaling pathway	0.0744593	Hypertrophic cardiomyopathy (HCM)	0.085973	IL-17 signaling pathway	0.00945609			Valine, leucine and isoleucine degradation	0.233723
Oxidative phosphorylation	0.0516028	Gastric cancer	0.0223353	T cell receptor signaling pathway	0.241593	T cell receptor signaling pathway	0.241593	Prolactin signaling pathway	0.0175503	Morphine addiction	0.100517			Lysine degradation	0.235166	Thermogenesis	0.0452626	Serotonergic synapse	0.0327374	IL-17 signaling pathway	0.0708577	Th1 and Th2 cell differentiation	0.0814837	Morphine addiction	0.00899836			JAK-STAT signaling pathway	0.231656
Apelin signaling pathway	0.0466911	Inflammatory mediator regulation of TRP channels	0.0213987	Ribosome	0.2245	Ribosome	0.2245	Measles	0.0166833	Small cell lung cancer	0.100517			Ferroptosis	0.234181	Staphylococcus aureus infection	0.0450367	Spliceosome	0.0327374	Retinol metabolism	0.0708577	C-type lectin receptor signaling pathway	0.0789457	Hematopoietic cell lineage	0.00815168			Drug metabolism	0.214247
Human T-cell leukemia virus 1 infection	0.0447786	Longevity regulating pathway	0.0213622	Chagas disease (American trypanosomiasis)	0.217572	Chagas disease (American trypanosomiasis)	0.217572	Bacterial invasion of epithelial cells	0.0151669	Hematopoietic cell lineage	0.0942343			Serotonergic synapse	0.23098	Cytokine-cytokine receptor interaction	0.0448532	Epstein-Barr virus infection	0.0314584	Human cytomegalovirus infection	0.0696054	Pentose and glucuronate interconversions	0.0778619	Staphylococcus aureus infection	0.00776026			Legionellosis	0.213489
Vascular smooth muscle contraction	0.0444319	Oxytocin signaling pathway	0.0184187	Pathways in cancer	0.211991	Pathways in cancer	0.211991	Glycosphingolipid biosynthesis	0.0148658	Staphylococcus aureus infection	0.0912631			Cardiac muscle contraction	0.229575	Glycerophospholipid metabolism	0.041891	Oxidative phosphorylation	0.0309775	Primary immunodeficiency	0.0682253	Colorectal cancer	0.0772338	mRNA surveillance pathway	0.00738859			Ribosome biogenesis in eukaryotes	0.20815
Oxytocin signaling pathway	0.0316192	Autophagy	0.0182871	Human immunodeficiency virus 1 infection	0.210908	Human immunodeficiency virus 1 infection	0.210908	Melanogenesis	0.014724	Prostate cancer	0.0856368			Cellular senescence	0.228284	Prostate cancer	0.041891	Thermogenesis	0.0301827	Morphine addiction	0.0672275	Complement and coagulation cascades	0.0772338	Proteoglycans in cancer	0.00703239			Oocyte meiosis	0.202245
Endocytosis	0.0290544	Pancreatic secretion	0.0179387	Cellular senescence	0.210541	Cellular senescence	0.210541	Breast cancer	0.0142453	Phosphatidylinositol signaling system	0.082973			Prostate cancer	0.221781	Cell adhesion molecules (CAMs)	0.041392	Signaling pathways regulating pluripotency of stem cells	0.0285285	Small cell lung cancer	0.0672275	Wnt signaling pathway	0.0747894	NOD-like receptor signaling pathway	0.00656022			Ribosome	0.201961
Cushing syndrome	0.0280765	Human T-cell leukemia virus 1 infection	0.0177364	Ether lipid metabolism	0.207118	Ether lipid metabolism	0.207118	Glioma	0.0141019	Choline metabolism in cancer	0.0804033			Bladder cancer	0.215926	Circadian entrainment	0.0389864	Human immunodeficiency virus 1 infection	0.0261226	Calcium signaling pathway	0.0659238	Basal cell carcinoma	0.0735941	Circadian entrainment	0.00638178			Long-term depression	0.186944
Wnt signaling pathway	0.0274213	Phagosome	0.0163079	Pertussis	0.205905	Pertussis	0.205905	Pancreatic cancer	0.0141019	Circadian entrainment	0.0804033			NOD-like receptor signaling pathway	0.209883	Human immunodeficiency virus 1 infection	0.0386856	Measles	0.0235952	Non-small cell lung cancer	0.0647403	Antigen processing and presentation	0.0693999	Melanogenesis	0.00607909			Epstein-Barr virus infection	0.177346
Cell adhesion molecules (CAMs)	0.0217101	Parathyroid hormone synthesis, secretion and action	0.0159669	ABC transporters	0.190658	ABC transporters	0.190658	Pathways in cancer	0.0132866	Longevity regulating pathway	0.0732213			Glycerolipid metabolism	0.206958	Human papillomavirus infection	0.0374958	Non-alcoholic fatty liver disease (NAFLD)	0.0195728	Thyroid cancer	0.0624394	Hepatitis B	0.066496	T cell receptor signaling pathway	0.00579143			Central carbon metabolism in cancer	0.164249
Ribosome	0.0217101	ABC transporters	0.0159296	Basal cell carcinoma	0.187573	Basal cell carcinoma	0.187573	Osteoclast differentiation	0.0115519	NF-kappa B signaling pathway	0.0732213			Choline metabolism in cancer	0.20143	AGE-RAGE signaling pathway in diabetic complications	0.0363024	mTOR signaling pathway	0.0180811	Chemical carcinogenesis	0.0605245	IL-17 signaling pathway	0.0657915	Rap1 signaling pathway	0.00570838			Ras signaling pathway	0.164111
Transcriptional misregulation in cancer	0.0161273	Type II diabetes mellitus	0.0159296	SNARE interactions in vesicular transport	0.186019	SNARE interactions in vesicular transport	0.186019	Cardiac muscle contraction	0.0113422	Pathways in cancer	0.0729694			Proximal tubule bicarbonate reclamation	0.184622	T cell receptor signaling pathway	0.0363024	Neuroactive ligand-receptor interaction	0.0171898	Kaposi sarcoma-associated herpesvirus infection	0.0572539	Retinol metabolism	0.0657915	Hepatitis C	0.00555142			Lysosome	0.161118
Chemokine signaling pathway	0.0117896	Amino sugar and nucleotide sugar metabolism	0.0146137	Necroptosis	0.17666	Necroptosis	0.17666	Sphingolipid metabolism	0.0112634	HIF-1 signaling pathway	0.0688378			RNA degradation	0.175031	Necroptosis	0.0353136	Cushing syndrome	0.0158595	Cortisol synthesis and secretion	0.0536092	TGF-beta signaling pathway	0.0657915	Aldosterone synthesis and secretion	0.00551801			Aminoacyl-tRNA biosynthesis	0.150927
MicroRNAs in cancer	0.00198889	Transcriptional misregulation in cancer	0.0142281	Phospholipase D signaling pathway	0.174073	Phospholipase D signaling pathway	0.174073	Human immunodeficiency virus 1 infection	0.010692	Endocytosis	0.0628178			Aldosterone synthesis and secretion	0.174346	Aldosterone synthesis and secretion	0.0350372	Cell adhesion molecules (CAMs)	0.0119349	Type I diabetes mellitus	0.0536092	Type I diabetes mellitus	0.0501331	HIF-1 signaling pathway	0.00501091			Metabolism of xenobiotics by cytochrome P450	0.150927
Cytokine-cytokine receptor interaction	0.00158936	Epstein-Barr virus infection	0.01396	Toxoplasmosis	0.1672	Toxoplasmosis	0.1672	Oxytocin signaling pathway	0.00982801	Insulin resistance	0.0573647			Chagas disease (American trypanosomiasis)	0.16615	NF-kappa B signaling pathway	0.0350372	Ribosome	0.0119349	African trypanosomiasis	0.052448	Prostate cancer	0.0478022	Hepatitis B	0.00493431			Transcriptional misregulation in cancer	0.150522
Olfactory transduction	2.19844e-06	Hepatitis C	0.0137674	N-Glycan biosynthesis	0.16172	N-Glycan biosynthesis	0.16172	Linoleic acid metabolism	0.0093859	Cholinergic synapse	0.0524453			Terpenoid backbone biosynthesis	0.163683	Pancreatic secretion	0.0315231	Hepatocellular carcinoma	0.0116334	Glycine, serine and threonine metabolism	0.0481327	Tyrosine metabolism	0.0456391	Pancreatic secretion	0.00477587			Osteoclast differentiation	0.144061
		Wnt signaling pathway	0.0137674	Signaling pathways regulating pluripotency of stem cells	0.159973	Signaling pathways regulating pluripotency of stem cells	0.159973	N-Glycan biosynthesis	0.0093859	Cytokine-cytokine receptor interaction	0.041436			HIF-1 signaling pathway	0.158337	Parathyroid hormone synthesis, secretion and action	0.0293956	Cytokine-cytokine receptor interaction	0.00871322	Nicotine addiction	0.0481327	Sphingolipid signaling pathway	0.0449291	JAK-STAT signaling pathway	0.0047444			Amphetamine addiction	0.138861
		Hepatitis B	0.0118928	Ras signaling pathway	0.158474	Ras signaling pathway	0.158474	Fanconi anemia pathway	0.00857421	Lysosome	0.038037			Histidine metabolism	0.145499	TNF signaling pathway	0.0264923	Herpes simplex virus 1 infection	0.00381316	Tyrosine metabolism	0.0481327	Gastric cancer	0.0427074	Regulation of actin cytoskeleton	0.00432059			p53 signaling pathway	0.122817
		Calcium signaling pathway	0.0108098	Non-small cell lung cancer	0.151815	Non-small cell lung cancer	0.151815	Estrogen signaling pathway	0.00818264	Serotonergic synapse	0.0303094			Vitamin digestion and absorption	0.145499	Cholinergic synapse	0.0238983	Regulation of actin cytoskeleton	0.00371894	p53 signaling pathway	0.0473178	Bladder cancer	0.0418837	C-type lectin receptor signaling pathway	0.0034214			Estrogen signaling pathway	0.122039
		Glycosaminoglycan biosynthesis	0.0104016	DNA replication	0.151461	DNA replication	0.151461	ECM-receptor interaction	0.00790412	Spliceosome	0.0303094			Regulation of actin cytoskeleton	0.142381	Huntington disease	0.0232177	Ras signaling pathway	0.00253416	Choline metabolism in cancer	0.0465803	Adherens junction	0.0414848	Glutamatergic synapse	0.00311299			Oxidative phosphorylation	0.122039
		Apoptosis	0.0102435	Primary immunodeficiency	0.136859	Primary immunodeficiency	0.136859	RNA degradation	0.00790412	Estrogen signaling pathway	0.0286581			Alcoholism	0.142191	Drug metabolism	0.0230959	Human papillomavirus infection	0.00223738	Bile secretion	0.0444662	Arrhythmogenic right ventricular cardiomyopathy (ARVC)	0.0414848	Human immunodeficiency virus 1 infection	0.00207439			B cell receptor signaling pathway	0.117957
		Thyroid hormone signaling pathway	0.0100189	C-type lectin receptor signaling pathway	0.135202	C-type lectin receptor signaling pathway	0.135202	Human T-cell leukemia virus 1 infection	0.00788262	Oxidative phosphorylation	0.0286581			Fc gamma R-mediated phagocytosis	0.141017	Leukocyte transendothelial migration	0.0223226	Human T-cell leukemia virus 1 infection	0.00190701	Bladder cancer	0.0442087	B cell receptor signaling pathway	0.0414848	Inflammatory mediator regulation of TRP channels	0.0016977			Signaling pathways regulating pluripotency of stem cells	0.112414
		Fc gamma R-mediated phagocytosis	0.00964138	Transcriptional misregulation in cancer	0.132832	Transcriptional misregulation in cancer	0.132832	Insulin resistance	0.00782404	Viral carcinogenesis	0.0284665			Hepatitis B	0.139489	Natural killer cell mediated cytotoxicity	0.0201659	Endocytosis	0.00108782	Homologous recombination	0.0442087	Melanoma	0.0414848	Oxidative phosphorylation	0.00123078			Apelin signaling pathway	0.10939
		Oocyte meiosis	0.00945145	Apoptosis	0.132551	Apoptosis	0.132551	Dopaminergic synapse	0.00772412	Phospholipase D signaling pathway	0.0189854			JAK-STAT signaling pathway	0.134246	Focal adhesion	0.0193567	MicroRNAs in cancer	0.0008242	Human papillomavirus infection	0.0427539	Inositol phosphate metabolism	0.0389601	Focal adhesion	0.00121021			Bacterial invasion of epithelial cells	0.108892
		Influenza A	0.00930673	RIG-I-like receptor signaling pathway	0.131892	RIG-I-like receptor signaling pathway	0.131892	Wnt signaling pathway	0.00712935	Non-alcoholic fatty liver disease (NAFLD)	0.0179893			Complement and coagulation cascades	0.133613	Endocytosis	0.0193281	Olfactory transduction	6.98611e-05	T cell receptor signaling pathway	0.0419575	Bacterial invasion of epithelial cells	0.0365947	Apelin signaling pathway	0.0010255			Parkinson disease	0.0929803
		Colorectal cancer	0.00902052	Glycosaminoglycan biosynthesis	0.126608	Glycosaminoglycan biosynthesis	0.126608	Transcriptional misregulation in cancer	0.00702315	Herpes simplex virus 1 infection	0.0144228			Human cytomegalovirus infection	0.132975	Rap1 signaling pathway	0.0149482			Inositol phosphate metabolism	0.0417933	Carbohydrate digestion and absorption	0.0353552	Insulin signaling pathway	0.000979907			NOD-like receptor signaling pathway	0.092223
		Endocrine and other factor-regulated calcium reabsorption	0.00879859	Osteoclast differentiation	0.124562	Osteoclast differentiation	0.124562	Signaling pathways regulating pluripotency of stem cells	0.00688157	Hepatitis C	0.0141517			Transcriptional misregulation in cancer	0.131435	Osteoclast differentiation	0.0144524			Osteoclast differentiation	0.0408004	Hedgehog signaling pathway	0.0325178	Apoptosis	0.000894859			Pathways in cancer	0.0886305
		GABAergic synapse	0.00789776	Fc gamma R-mediated phagocytosis	0.103113	Fc gamma R-mediated phagocytosis	0.103113	Endocytosis	0.00682998	Protein processing in endoplasmic reticulum	0.0130753			Human immunodeficiency virus 1 infection	0.129214	Relaxin signaling pathway	0.0130975			Pathways in cancer	0.0400544	Mineral absorption	0.0325178	Human papillomavirus infection	0.000867939			Breast cancer	0.0857793
		Breast cancer	0.00744957	Viral myocarditis	0.103113	Viral myocarditis	0.103113	Apelin signaling pathway	0.00649486	PI3K-Akt signaling pathway	0.0128414			Osteoclast differentiation	0.125947	Regulation of actin cytoskeleton	0.0121682			Carbohydrate digestion and absorption	0.0373801	Epstein-Barr virus infection	0.0321792	Parkinson disease	0.000781232			Phospholipase D signaling pathway	0.0813097
		Legionellosis	0.00686504	Colorectal cancer	0.0968025	Colorectal cancer	0.0968025	Gap junction	0.00637012	RNA transport	0.0117738			Acute myeloid leukemia	0.12512	Oxidative phosphorylation	0.0118772			Pancreatic cancer	0.0369367	Glycosphingolipid biosynthesis	0.029928	Breast cancer	0.000682342			ECM-receptor interaction	0.0768648
		Retrograde endocannabinoid signaling	0.00634884	Fat digestion and absorption	0.0919471	Fat digestion and absorption	0.0919471	Insulin secretion	0.00637012	Phagosome	0.00841192			Sphingolipid metabolism	0.124473	Purine metabolism	0.0111312			Relaxin signaling pathway	0.0354955	Human cytomegalovirus infection	0.0292831	Retrograde endocannabinoid signaling	0.000596229			Rheumatoid arthritis	0.0740243
		Hematopoietic cell lineage	0.00605855	Homologous recombination	0.0833842	Homologous recombination	0.0833842	Hepatitis B	0.00606621	Ras signaling pathway	0.00225455			Type II diabetes mellitus	0.124473	Herpes simplex virus 1 infection	0.00964501			Chronic myeloid leukemia	0.0347319	Hippo signaling pathway	0.0289591	Non-alcoholic fatty liver disease (NAFLD)	0.000570064			PPAR signaling pathway	0.0713022
		Circadian entrainment	0.00435473	Glioma	0.080682	Glioma	0.080682	Fc gamma R-mediated phagocytosis	0.00592884	Human T-cell leukemia virus 1 infection	0.00168837			TNF signaling pathway	0.118548	Ras signaling pathway	0.00808052			Pertussis	0.0347319	Toxoplasmosis	0.0266862	MicroRNAs in cancer	0.00045627			Insulin secretion	0.068693
		Central carbon metabolism in cancer	0.00421721	Pancreatic cancer	0.080682	Pancreatic cancer	0.080682	Leukocyte transendothelial migration	0.00569964	MicroRNAs in cancer	0.000719093			Amino sugar and nucleotide sugar metabolism	0.115292	Cushing syndrome	0.00536738			Renin secretion	0.0347319	Signaling pathways regulating pluripotency of stem cells	0.024312	Epstein-Barr virus infection	0.000378021			Fc gamma R-mediated phagocytosis	0.0661911
		Cellular senescence	0.00399693	Inflammatory bowel disease (IBD)	0.078048	Inflammatory bowel disease (IBD)	0.078048	Ribosome biogenesis in eukaryotes	0.00569964	Olfactory transduction	0.000505456			Notch signaling pathway	0.115292	Ribosome	0.00382072			Hedgehog signaling pathway	0.0344089	Sphingolipid metabolism	0.0234174	Thermogenesis	0.000349865			Cushing syndrome	0.0623754
		Relaxin signaling pathway	0.00393347	Phenylalanine metabolism	0.0754753	Phenylalanine metabolism	0.0754753	Complement and coagulation cascades	0.00551847					Morphine addiction	0.107711	Olfactory transduction	0.00161337			Mineral absorption	0.0344089	Malaria	0.0216031	Ras signaling pathway	0.000323814			Arachidonic acid metabolism	0.0614896
		Serotonergic synapse	0.00370958	Apelin signaling pathway	0.07495	Apelin signaling pathway	0.07495	cAMP signaling pathway	0.00526694					Cysteine and methionine metabolism	0.106835	MicroRNAs in cancer	0.000148701			Pancreatic secretion	0.0340525	N-Glycan biosynthesis	0.0199398	RNA transport	0.000279657			Steroid hormone biosynthesis	0.0614896
		Non-small cell lung cancer	0.00359333	Human cytomegalovirus infection	0.0707656	Human cytomegalovirus infection	0.0707656	Steroid hormone biosynthesis	0.00513681					Spliceosome	0.105502					Synaptic vesicle cycle	0.0326632	Ribosome biogenesis in eukaryotes	0.0184294	Pathways in cancer	0.000252372			GABAergic synapse	0.0592807
		HIF-1 signaling pathway	0.00313345	Synaptic vesicle cycle	0.0701133	Synaptic vesicle cycle	0.0701133	Tight junction	0.0048862					Adherens junction	0.103861					Glycosphingolipid biosynthesis	0.031695	Thyroid hormone signaling pathway	0.0184294	cGMP-PKG signaling pathway	0.00022432			Thermogenesis	0.052085
		Renal cell carcinoma	0.0030649	Carbohydrate digestion and absorption	0.0686938	Carbohydrate digestion and absorption	0.0686938	Dilated cardiomyopathy (DCM)	0.00478181					Bile secretion	0.103861					Rap1 signaling pathway	0.0316323	Natural killer cell mediated cytotoxicity	0.0157259	PI3K-Akt signaling pathway	0.000202194			Staphylococcus aureus infection	0.049488
		Acute myeloid leukemia	0.00283162	Vitamin digestion and absorption	0.0658741	Vitamin digestion and absorption	0.0658741	Cell adhesion molecules (CAMs)	0.00415134					Inositol phosphate metabolism	0.0976329					Estrogen signaling pathway	0.0308732	Breast cancer	0.015104	Alzheimer disease	0.000196609			Glycerophospholipid metabolism	0.0460878
		Type I diabetes mellitus	0.00283162	Cardiac muscle contraction	0.0653582	Cardiac muscle contraction	0.0653582	Morphine addiction	0.00414438					cAMP signaling pathway	0.0936785					Ether lipid metabolism	0.0269428	Steroid hormone biosynthesis	0.0145111	Necroptosis	0.000188167			Circadian entrainment	0.0429452
		Amoebiasis	0.00274763	Epstein-Barr virus infection	0.064322	Epstein-Barr virus infection	0.064322	Regulation of actin cytoskeleton	0.00393057					Endocytosis	0.0862276					Human immunodeficiency virus 1 infection	0.0265046	Proteoglycans in cancer	0.0132335	Tuberculosis	0.000172375			Melanogenesis	0.0414634
		Human papillomavirus infection	0.00270482	Kaposi sarcoma-associated herpesvirus infection	0.060701	Kaposi sarcoma-associated herpesvirus infection	0.060701	Focal adhesion	0.00309461					Glycosaminoglycan biosynthesis	0.08521					Apelin signaling pathway	0.0256225	Axon guidance	0.0115175	Huntington disease	9.36746e-05			Aldosterone synthesis and secretion	0.0386665
		Tight junction	0.00254512	Asthma	0.0576278	Asthma	0.0576278	Platelet activation	0.00301932					Necroptosis	0.0842911					Cocaine addiction	0.0248627	Pathways in cancer	0.0111246	Kaposi sarcoma-associated herpesvirus infection	3.34318e-05			Glucagon signaling pathway	0.0386665
		Insulin signaling pathway	0.00245974	Proteoglycans in cancer	0.0567896	Proteoglycans in cancer	0.0567896	Allograft rejection	0.00298604					Fatty acid elongation	0.083395					Type II diabetes mellitus	0.0248627	Endometrial cancer	0.0106765	Herpes simplex virus 1 infection	2.61729e-06			Axon guidance	0.0361405
		Adipocytokine signaling pathway	0.00241865	Hippo signaling pathway	0.0554222	Hippo signaling pathway	0.0554222	Graft-versus-host disease	0.00274054					Glycerophospholipid metabolism	0.0822955					Regulation of actin cytoskeleton	0.0234254	VEGF signaling pathway	0.0106765					HIF-1 signaling pathway	0.0360762
		Toxoplasmosis	0.00240963	Central carbon metabolism in cancer	0.0523582	Central carbon metabolism in cancer	0.0523582	Toll-like receptor signaling pathway	0.0025155					Kaposi sarcoma-associated herpesvirus infection	0.0784658					Vascular smooth muscle contraction	0.0233379	Lysine degradation	0.00989202					Natural killer cell mediated cytotoxicity	0.0224781
		B cell receptor signaling pathway	0.00223607	Drug metabolism	0.051539	Drug metabolism	0.051539	AGE-RAGE signaling pathway in diabetic complications	0.00218186					Synaptic vesicle cycle	0.0763125					Malaria	0.0229559	Cytosolic DNA-sensing pathway	0.00850038					Neuroactive ligand-receptor interaction	0.0176243
		Prolactin signaling pathway	0.00223607	Folate biosynthesis	0.0505209	Folate biosynthesis	0.0505209	Glycolysis / Gluconeogenesis	0.00212202					Toll-like receptor signaling pathway	0.0738959					Arginine and proline metabolism	0.0212064	Glycerolipid metabolism	0.00850038					Serotonergic synapse	0.0142558
		Inositol phosphate metabolism	0.00206771	Leukocyte transendothelial migration	0.048572	Leukocyte transendothelial migration	0.048572	Relaxin signaling pathway	0.00205967					Hepatitis C	0.0733272					N-Glycan biosynthesis	0.0212064	Long-term depression	0.00850038					Non-alcoholic fatty liver disease (NAFLD)	0.00784992
		Gastric acid secretion	0.00191242	Hepatitis B	0.0453839	Hepatitis B	0.0453839	Longevity regulating pathway	0.00203212					AGE-RAGE signaling pathway in diabetic complications	0.0663511					Fc gamma R-mediated phagocytosis	0.0177882	Toll-like receptor signaling pathway	0.00791618					Wnt signaling pathway	0.0059576
		Glioma	0.00176914	Leishmaniasis	0.0412496	Leishmaniasis	0.0412496	RIG-I-like receptor signaling pathway	0.00194957					Ovarian steroidogenesis	0.063332					Focal adhesion	0.0176954	Allograft rejection	0.00731381					MicroRNAs in cancer	0.00290039
		Pancreatic cancer	0.00176914	Mucin type O-glycan biosynthesis	0.0390501	Mucin type O-glycan biosynthesis	0.0390501	Spliceosome	0.00193229					Measles	0.0616567					Colorectal cancer	0.0167484	AGE-RAGE signaling pathway in diabetic complications	0.00701747					Calcium signaling pathway	0.00250512
		Chronic myeloid leukemia	0.00163692	RNA polymerase	0.0390501	RNA polymerase	0.0390501	Acute myeloid leukemia	0.00179155					Lysosome	0.0600483					Complement and coagulation cascades	0.0167484	T cell receptor signaling pathway	0.00701747					Huntington disease	0.0022941
		Leukocyte transendothelial migration	0.00152341	Notch signaling pathway	0.0388402	Notch signaling pathway	0.0388402	Type I diabetes mellitus	0.00179155					Platelet activation	0.0571808					Taste transduction	0.0167484	Central carbon metabolism in cancer	0.0067872					Cytokine-cytokine receptor interaction	0.00221394
		Autoimmune thyroid disease	0.00140215	Linoleic acid metabolism	0.0353662	Linoleic acid metabolism	0.0353662	Pancreatic secretion	0.0016421					Human papillomavirus infection	0.0510252					Steroid hormone biosynthesis	0.0157708	Leishmaniasis	0.0054332					Olfactory transduction	0.000449887
		Tuberculosis	0.00139879	Type I diabetes mellitus	0.0351968	Type I diabetes mellitus	0.0351968	Thyroid hormone synthesis	0.00128042					Prion diseases	0.0497861					Phospholipase D signaling pathway	0.0153051	Fc epsilon RI signaling pathway	0.00504744
		Natural killer cell mediated cytotoxicity	0.00125209	Taste transduction	0.032312	Taste transduction	0.032312	Insulin signaling pathway	0.00123496					Phospholipase D signaling pathway	0.0491537					GABAergic synapse	0.0148513	Acute myeloid leukemia	0.00469023
		ECM-receptor interaction	0.00095505	Lysosome	0.0283278	Lysosome	0.0283278	Gastric acid secretion	0.0011779					Cytosolic DNA-sensing pathway	0.0472858					Endocrine and other factor-regulated calcium reabsorption	0.0143685	Apoptosis	0.00464748
		ErbB signaling pathway	0.000884873	IL-17 signaling pathway	0.0261283	IL-17 signaling pathway	0.0261283	Chronic myeloid leukemia	0.000997414					Viral myocarditis	0.0414187					NOD-like receptor signaling pathway	0.0138664	TNF signaling pathway	0.004089
		Lysosome	0.000846295	Biosynthesis of unsaturated fatty acids	0.0237781	Biosynthesis of unsaturated fatty acids	0.0237781	Pertussis	0.000997414					Central carbon metabolism in cancer	0.0380744					Transcriptional misregulation in cancer	0.0114125	Measles	0.003962
		Sphingolipid signaling pathway	0.000846295	beta-Alanine metabolism	0.0237781	beta-Alanine metabolism	0.0237781	Renin secretion	0.000997414					Antigen processing and presentation	0.0345097					Prostate cancer	0.00977265	NOD-like receptor signaling pathway	0.00373151
		Osteoclast differentiation	0.000652044	Bacterial invasion of epithelial cells	0.0236854	Bacterial invasion of epithelial cells	0.0236854	PI3K-Akt signaling pathway	0.000944624					GABAergic synapse	0.0345097					Phosphatidylinositol signaling system	0.00920782	Tuberculosis	0.003371
		JAK-STAT signaling pathway	0.000561869	Chemical carcinogenesis	0.0211146	Chemical carcinogenesis	0.0211146	Synaptic vesicle cycle	0.000918078					Focal adhesion	0.0334707					Glycerolipid metabolism	0.00912612	Rap1 signaling pathway	0.00310678
		Antigen processing and presentation	0.000561471	Axon guidance	0.0189259	Axon guidance	0.0189259	Cytokine-cytokine receptor interaction	0.000917816					TGF-beta signaling pathway	0.0324747					Hepatitis C	0.00910303	Pertussis	0.00282349
		Progesterone-mediated oocyte maturation	0.000561471	Pentose and glucuronate interconversions	0.0186998	Pentose and glucuronate interconversions	0.0186998	Autoimmune thyroid disease	0.000845205					Phagosome	0.0312188					MAPK signaling pathway	0.00858997	MAPK signaling pathway	0.00273528
		TGF-beta signaling pathway	0.000520725	Serotonergic synapse	0.0173893	Serotonergic synapse	0.0173893	Salivary secretion	0.000845205					Hippo signaling pathway	0.0310716					AGE-RAGE signaling pathway in diabetic complications	0.00770424	Cardiac muscle contraction	0.00244683
		FoxO signaling pathway	0.00050252	Prostate cancer	0.0170514	Prostate cancer	0.0170514	MAPK signaling pathway	0.000834515					Leishmaniasis	0.0307123					Central carbon metabolism in cancer	0.00730585	Kaposi sarcoma-associated herpesvirus infection	0.0022504
		Small cell lung cancer	0.000482997	Estrogen signaling pathway	0.0153722	Estrogen signaling pathway	0.0153722	Adrenergic signaling in cardiomyocytes	0.000693209					African trypanosomiasis	0.0305903					NF-kappa B signaling pathway	0.00726047	Neurotrophin signaling pathway	0.00212097
		PI3K-Akt signaling pathway	0.000452164	Nicotinate and nicotinamide metabolism	0.0147697	Nicotinate and nicotinamide metabolism	0.0147697	Phospholipase D signaling pathway	0.000650046					Natural killer cell mediated cytotoxicity	0.026462					Leishmaniasis	0.00586371	PI3K-Akt signaling pathway	0.00178399
		Estrogen signaling pathway	0.000441199	Renin-angiotensin system	0.0147697	Renin-angiotensin system	0.0147697	Herpes simplex virus 1 infection	0.000553833					Rap1 signaling pathway	0.0220978					Apoptosis	0.00521284	Lysosome	0.00177426
		Staphylococcus aureus infection	0.000385722	Natural killer cell mediated cytotoxicity	0.0139588	Natural killer cell mediated cytotoxicity	0.0139588	Phagosome	0.000545287					Melanoma	0.0215384					Herpes simplex virus 1 infection	0.00488236	ECM-receptor interaction	0.00171586
		Proteoglycans in cancer	0.00035236	PI3K-Akt signaling pathway	0.0128239	PI3K-Akt signaling pathway	0.0128239	Rheumatoid arthritis	0.000516396					Phosphatidylinositol signaling system	0.0212305					Measles	0.00445542	Hepatitis C	0.00168678
		Apelin signaling pathway	0.000340161	Aldosterone-regulated sodium reabsorption	0.0117098	Aldosterone-regulated sodium reabsorption	0.0117098	Ras signaling pathway	0.000510391					Carbohydrate digestion and absorption	0.0210439					Melanoma	0.00408504	Rheumatoid arthritis	0.00159908
		NOD-like receptor signaling pathway	0.000315267	Tyrosine metabolism	0.00931497	Tyrosine metabolism	0.00931497	Rap1 signaling pathway	0.000473158					Intestinal immune network for IgA production	0.0210439					Prolactin signaling pathway	0.00408504	Human papillomavirus infection	0.00159276
		Rap1 signaling pathway	0.000252298	Amoebiasis	0.00894058	Amoebiasis	0.00894058	Cellular senescence	0.000403745					Cell cycle	0.0201532					Thyroid hormone synthesis	0.00380275	Osteoclast differentiation	0.0013989
		MAPK signaling pathway	0.000247538	Arachidonic acid metabolism	0.00721835	Arachidonic acid metabolism	0.00721835	Taste transduction	0.000372956					Mineral absorption	0.0191994					Bacterial invasion of epithelial cells	0.00354071	JAK-STAT signaling pathway	0.00136146
		T cell receptor signaling pathway	0.000246769	Focal adhesion	0.00678592	Focal adhesion	0.00678592	Hippo signaling pathway	0.000341366					Bacterial invasion of epithelial cells	0.0187069					Cytokine-cytokine receptor interaction	0.00353303	Fc gamma R-mediated phagocytosis	0.00129546
		Neuroactive ligand-receptor interaction	0.000223957	Antigen processing and presentation	0.00666745	Antigen processing and presentation	0.00666745	GABAergic synapse	0.000317219					NF-kappa B signaling pathway	0.0166549					Ribosome biogenesis in eukaryotes	0.0033701	Viral myocarditis	0.00129546
		Axon guidance	0.000216983	Intestinal immune network for IgA production	0.00664527	Intestinal immune network for IgA production	0.00664527	GnRH signaling pathway	0.000317219					Chronic myeloid leukemia	0.0162556					Autoimmune thyroid disease	0.0026664	Focal adhesion	0.001195
		Chagas disease (American trypanosomiasis)	0.000212816	Regulation of actin cytoskeleton	0.00631576	Regulation of actin cytoskeleton	0.00631576	Retinol metabolism	0.000292615					Proteasome	0.0160116					Salivary secretion	0.0026664	Tight junction	0.00115912
		Kaposi sarcoma-associated herpesvirus infection	0.000170676	Acute myeloid leukemia	0.00622499	Acute myeloid leukemia	0.00622499	Serotonergic synapse	0.000243612					Ether lipid metabolism	0.0146351					PI3K-Akt signaling pathway	0.00218817	Arachidonic acid metabolism	0.00112661
		Phospholipase D signaling pathway	0.000166608	Mineral absorption	0.00594555	Mineral absorption	0.00594555	Hematopoietic cell lineage	0.000229849					Pancreatic secretion	0.0138824					ECM-receptor interaction	0.00187814	Serotonergic synapse	0.00110327
		Herpes simplex virus 1 infection	0.000140456	Small cell lung cancer	0.00568799	Small cell lung cancer	0.00568799	Circadian entrainment	0.00015408					Amoebiasis	0.0130647					Rheumatoid arthritis	0.00175187	Protein digestion and absorption	0.00105083
		C-type lectin receptor signaling pathway	0.000109871	Endocytosis	0.00539	Endocytosis	0.00539	NF-kappa B signaling pathway	0.000121377					Malaria	0.0122469					Gap junction	0.00152493	Phosphatidylinositol signaling system	0.000604754
		Human cytomegalovirus infection	0.000105105	p53 signaling pathway	0.00520058	p53 signaling pathway	0.00520058	NOD-like receptor signaling pathway	0.000120384					Linoleic acid metabolism	0.0112117					Arachidonic acid metabolism	0.00123976	Phagosome	0.000576109
		Chemokine signaling pathway	7.87755e-05	Ribosome biogenesis in eukaryotes	0.00465515	Ribosome biogenesis in eukaryotes	0.00465515	TNF signaling pathway	6.45643e-05					ECM-receptor interaction	0.00997478					Neuroactive ligand-receptor interaction	0.00113032	NF-kappa B signaling pathway	0.000460025
		Focal adhesion	6.99312e-05	Sphingolipid metabolism	0.00383159	Sphingolipid metabolism	0.00383159	Kaposi sarcoma-associated herpesvirus infection	6.17238e-05					Viral carcinogenesis	0.00939474					TGF-beta signaling pathway	0.00108067	Ras signaling pathway	0.000216194
		Human immunodeficiency virus 1 infection	4.98146e-05	Chronic myeloid leukemia	0.00332261	Chronic myeloid leukemia	0.00332261	Cushing syndrome	3.68362e-05					Ribosome biogenesis in eukaryotes	0.00756078					Hematopoietic cell lineage	0.000880324	Leukocyte transendothelial migration	0.000191129
		Cell cycle	4.94914e-05	Fanconi anemia pathway	0.00277045	Fanconi anemia pathway	0.00277045	Chemokine signaling pathway	2.94302e-05					Taste transduction	0.00705474					Phagosome	0.00066848	MicroRNAs in cancer	0.000102772
		Regulation of actin cytoskeleton	2.40977e-05	Cell cycle	0.00259075	Cell cycle	0.00259075	Epstein-Barr virus infection	2.81352e-05					Retinol metabolism	0.00573548					Parathyroid hormone synthesis, secretion and action	0.000366279	Herpes simplex virus 1 infection	8.95217e-05
		Ras signaling pathway	9.58886e-06	NF-kappa B signaling pathway	0.00256428	NF-kappa B signaling pathway	0.00256428	Proteoglycans in cancer	2.0095e-05					Hematopoietic cell lineage	0.00466526					Chemokine signaling pathway	0.00027085	Regulation of actin cytoskeleton	7.78756e-05
		Pathways in cancer	3.16941e-06	NOD-like receptor signaling pathway	0.00175153	NOD-like receptor signaling pathway	0.00175153	Human papillomavirus infection	9.60888e-06					Cytokine-cytokine receptor interaction	0.00411896					Ras signaling pathway	0.000259062	Human immunodeficiency virus 1 infection	2.51465e-05
		Cytokine-cytokine receptor interaction	3.04986e-06	Rheumatoid arthritis	0.00162795	Rheumatoid arthritis	0.00162795	Human cytomegalovirus infection	6.2619e-06					PI3K-Akt signaling pathway	0.00398198					Lysosome	0.000119119	Chemokine signaling pathway	2.42645e-05
		Cell adhesion molecules (CAMs)	2.03597e-06	Human papillomavirus infection	0.00148497	Human papillomavirus infection	0.00148497	Neuroactive ligand-receptor interaction	4.9559e-06					Allograft rejection	0.00369185					Olfactory transduction	1.6736e-06	Cell adhesion molecules (CAMs)	5.50681e-06
		Olfactory transduction	1.88721e-06	Cytosolic DNA-sensing pathway	0.000964118	Cytosolic DNA-sensing pathway	0.000964118	Calcium signaling pathway	4.94253e-06					Axon guidance	0.00351807					MicroRNAs in cancer	7.07912e-07	Cytokine-cytokine receptor interaction	1.93342e-06
				TGF-beta signaling pathway	0.000874223	TGF-beta signaling pathway	0.000874223	Olfactory transduction	2.18375e-06					Ras signaling pathway	0.00278343							Olfactory transduction	1.4711e-06
				Allograft rejection	0.000783628	Allograft rejection	0.000783628	MicroRNAs in cancer	7.58665e-07					Type I diabetes mellitus	0.00225094							Neuroactive ligand-receptor interaction	1.3647e-06
				Graft-versus-host disease	0.000706768	Graft-versus-host disease	0.000706768							Leukocyte transendothelial migration	0.00110996
				Hematopoietic cell lineage	0.000670108	Hematopoietic cell lineage	0.000670108							Arachidonic acid metabolism	0.000456105
				JAK-STAT signaling pathway	0.000593199	JAK-STAT signaling pathway	0.000593199							Steroid hormone biosynthesis	0.000456105
				Neuroactive ligand-receptor interaction	0.000212692	Neuroactive ligand-receptor interaction	0.000212692							Protein digestion and absorption	0.000421811
				Phagosome	0.000189053	Phagosome	0.000189053							Chemokine signaling pathway	0.000310529
				Autoimmune thyroid disease	0.000170658	Autoimmune thyroid disease	0.000170658							Ribosome	0.000257114
				Measles	8.68267e-05	Measles	8.68267e-05							Epstein-Barr virus infection	0.000250818
				Complement and coagulation cascades	6.32978e-05	Complement and coagulation cascades	6.32978e-05							Neuroactive ligand-receptor interaction	3.36094e-05
				Steroid hormone biosynthesis	5.7377e-05	Steroid hormone biosynthesis	5.7377e-05							Cell adhesion molecules (CAMs)	2.72255e-05
				Chemokine signaling pathway	5.54196e-05	Chemokine signaling pathway	5.54196e-05							MicroRNAs in cancer	1.43498e-05
				Retinol metabolism	4.71707e-05	Retinol metabolism	4.71707e-05							Herpes simplex virus 1 infection	7.67188e-06
				Staphylococcus aureus infection	3.19538e-05	Staphylococcus aureus infection	3.19538e-05							Olfactory transduction	4.99493e-07
				Hepatitis C	2.3957e-05	Hepatitis C	2.3957e-05
				Herpes simplex virus 1 infection	3.42531e-06	Herpes simplex virus 1 infection	3.42531e-06
				Cell adhesion molecules (CAMs)	1.337e-06	Cell adhesion molecules (CAMs)	1.337e-06
				MicroRNAs in cancer	1.02263e-06	MicroRNAs in cancer	1.02263e-06
				Cytokine-cytokine receptor interaction	7.30389e-07	Cytokine-cytokine receptor interaction	7.30389e-07
				Olfactory transduction	6.86457e-07	Olfactory transduction	6.86457e-07

## Sheet: KEGG Up 
Term 2	Score 2	Term 6	Score 6	Term 9	Score 9	Term 12	Score 12	Term 15	Score 15	Term 18	Score 18	Term 21	Score 21	Term 24	Score 24	Term 27	Score 27	Term 30	Score 30	Term 33	Score 33	Term 41	Score 41	Term 46	Score 46		KEGG Pathway (Upreg. Genes)	Score
NF-kappa B signaling pathway	63.2892	TNF signaling pathway	61.3301	Lysosome	154.707	Lysosome	146.904	Lysosome	89.5145	Neomycin, kanamycin and gentamicin biosynthesis	146.097	Lysosome	119.176	Lysosome	29.4502	Pancreatic cancer	62.3677	Lysosome	200.547	Lysosome	159.471	Cytokine-cytokine receptor interaction	49.0586	ECM-receptor interaction	116.95		Lysosome	980.654
TNF signaling pathway	54.5545	Proteoglycans in cancer	49.6668	Osteoclast differentiation	108.246	Apoptosis	117.339	Osteoclast differentiation	37.5169	Galactose metabolism	55.4294	Phagosome	92.965	TNF signaling pathway	20.9299	HIF-1 signaling pathway	53.3627	Tuberculosis	91.4277	Pancreatic cancer	72.3739	ECM-receptor interaction	35.4296	Proteoglycans in cancer	44.1577		Osteoclast differentiation	522.858
IL-17 signaling pathway	52.6534	Lysosome	46.5307	Phagosome	96.4694	Osteoclast differentiation	94.8568	Other glycan degradation	34.2943	Central carbon metabolism in cancer	50.8731	Osteoclast differentiation	61.5552	Toxoplasmosis	18.7389	Small cell lung cancer	44.2974	Other glycan degradation	67.5737	Leishmaniasis	65.625	Osteoclast differentiation	34.6494	Focal adhesion	22.6828		Phagosome	451.697
Cytokine-cytokine receptor interaction	50.0399	AGE-RAGE signaling pathway in diabetic complications	43.7946	Toll-like receptor signaling pathway	91.2449	B cell receptor signaling pathway	75.4783	C-type lectin receptor signaling pathway	33.4181	Fructose and mannose metabolism	48.73	TNF signaling pathway	61.3301	Apoptosis	18.4172	Melanoma	42.2262	Phagosome	58.9645	Bladder cancer	63.53	Protein digestion and absorption	30.6687	Other glycan degradation	20.7154		TNF signaling pathway	448.257
Mineral absorption	37.734	Prostate cancer	41.4314	TNF signaling pathway	78.634	TNF signaling pathway	67.563	Phagosome	29.7715	HIF-1 signaling pathway	47.6659	Other glycan degradation	51.5188	Glycosaminoglycan degradation	17.4374	Glioma	39.4318	Proteoglycans in cancer	51.9497	Endometrial cancer	60.9171	IL-17 signaling pathway	30.0638	Acute myeloid leukemia	20.5472		Apoptosis	384.461
Osteoclast differentiation	26.0431	Pancreatic cancer	38.1608	Intestinal immune network for IgA production	77.6442	Toll-like receptor signaling pathway	63.9918	Glycosaminoglycan degradation	26.3469	Glycolysis / Gluconeogenesis	47.4542	Apoptosis	38.6329	Human T-cell leukemia virus 1 infection	16.766	Arginine biosynthesis	38.0772	Glycosaminoglycan degradation	50.8619	Toxoplasmosis	59.7397	Other glycan degradation	29.1901	IL-17 signaling pathway	19.8701		Toll-like receptor signaling pathway	366.668
HIF-1 signaling pathway	24.7305	HIF-1 signaling pathway	35.1938	NF-kappa B signaling pathway	77.388	Pancreatic cancer	60.7689	Apoptosis	24.7832	Intestinal immune network for IgA production	36.0619	Proteoglycans in cancer	37.1844	Toll-like receptor signaling pathway	16.3516	Focal adhesion	32.2029	Osteoclast differentiation	48.6443	Epstein-Barr virus infection	57.6902	Hematopoietic cell lineage	28.3472	Lysosome	16.4834		Other glycan degradation	312.35
Pathways in cancer	24.2607	Relaxin signaling pathway	31.1771	Apoptosis	67.5591	Adherens junction	58.5462	Pancreatic cancer	21.1699	Osteoclast differentiation	16.7463	Toll-like receptor signaling pathway	33.7608	Pancreatic cancer	16.0554	Hypertrophic cardiomyopathy (HCM)	31.2086	Relaxin signaling pathway	46.0058	Prostate cancer	57.0131	Steroid biosynthesis	26.8833	Glycosaminoglycan degradation	16.2135		Proteoglycans in cancer	312.705
Glycosphingolipid biosynthesis	23.9222	Legionellosis	29.5099	Glycosaminoglycan degradation	58.9504	C-type lectin receptor signaling pathway	58.5399	Toll-like receptor signaling pathway	21.1288	Chemokine signaling pathway	16.2039	Malaria	33.3676	Fluid shear stress and atherosclerosis	15.8626	Bladder cancer	30.2228	ECM-receptor interaction	45.0181	Apoptosis	54.4726	AGE-RAGE signaling pathway in diabetic complications	24.8419	Phagosome	15.5106		NF-kappa B signaling pathway	311.995
JAK-STAT signaling pathway	23.1744	NF-kappa B signaling pathway	26.5524	Toxoplasmosis	54.9808	Fc gamma R-mediated phagocytosis	55.2044	Colorectal cancer	20.5315	Mucin type O-glycan biosynthesis	14.3073	AGE-RAGE signaling pathway in diabetic complications	32.1899	NF-kappa B signaling pathway	14.3756	Central carbon metabolism in cancer	29.4359	Fc gamma R-mediated phagocytosis	40.4467	Phagosome	53.4115	TNF signaling pathway	21.1621	Osteoclast differentiation	15.4382		HIF-1 signaling pathway	254.261
Hematopoietic cell lineage	23.139	Chemokine signaling pathway	26.0088	Chemokine signaling pathway	53.9433	AGE-RAGE signaling pathway in diabetic complications	54.713	Legionellosis	17.5158	ECM-receptor interaction	12.9684	Chagas disease (American trypanosomiasis)	30.7073	Prostate cancer	14.3451	Non-small cell lung cancer	27.9463	Pertussis	39.4413	Acute myeloid leukemia	51.6591	Central carbon metabolism in cancer	19.7287	TNF signaling pathway	13.6429
Acute myeloid leukemia	23.0186	Chagas disease (American trypanosomiasis)	25.9219	Antigen processing and presentation	53.9027	Human cytomegalovirus infection	52.7959	Inflammatory bowel disease (IBD)	16.9099	Complement and coagulation cascades	11.7739	IL-17 signaling pathway	29.307	Osteoclast differentiation	14.1944	Prostate cancer	25.2529	Apoptosis	38.3739	Non-small cell lung cancer	46.7819	Glycolysis / Gluconeogenesis	18.1806	C-type lectin receptor signaling pathway	13.1475
Phagosome	22.8748	Focal adhesion	25.2783	Graft-versus-host disease	52.806	Chagas disease (American trypanosomiasis)	52.1613	TNF signaling pathway	16.6637	beta-Alanine metabolism	11.7531	Amoebiasis	28.6354	Hepatitis B	13.8768	Arrhythmogenic right ventricular cardiomyopathy (ARVC)	24.0853	Focal adhesion	37.7055	Osteoclast differentiation	46.6579	Staphylococcus aureus infection	17.1334	Central carbon metabolism in cancer	13.1384
Toxoplasmosis	22.8024	Leukocyte transendothelial migration	23.352	Fc gamma R-mediated phagocytosis	45.3642	Measles	50.4517	B cell receptor signaling pathway	16.3626	Pentose phosphate pathway	11.7531	Necroptosis	27.8703	Chagas disease (American trypanosomiasis)	13.7698	PI3K-Akt signaling pathway	22.325	Non-small cell lung cancer	37.4684	Measles	45.913	Toll-like receptor signaling pathway	15.84	Hedgehog signaling pathway	12.4585
Chemokine signaling pathway	22.4197	Thyroid hormone signaling pathway	23.352	Chagas disease (American trypanosomiasis)	43.8549	Kaposi sarcoma-associated herpesvirus infection	48.8873	Epstein-Barr virus infection	16.2863	Protein digestion and absorption	11.3415	NF-kappa B signaling pathway	26.5524	Epstein-Barr virus infection	13.6541	Chronic myeloid leukemia	21.928	Protein digestion and absorption	37.3946	Hepatitis C	45.5625	Sphingolipid metabolism	15.8173	Protein digestion and absorption	12.3463
ECM-receptor interaction	22.093	Toxoplasmosis	23.0253	Other glycan degradation	42.2151	Bacterial invasion of epithelial cells	47.9114	AGE-RAGE signaling pathway in diabetic complications	15.1033	Starch and sucrose metabolism	11.2269	Focal adhesion	25.2783	Pertussis	13.3638	Measles	19.7157	B cell receptor signaling pathway	37.2495	Influenza A	45.4981	Malaria	15.2614	Human papillomavirus infection	12.0194
Toll-like receptor signaling pathway	20.7147	Adherens junction	22.7404	Kaposi sarcoma-associated herpesvirus infection	41.6975	NF-kappa B signaling pathway	47.665	Chronic myeloid leukemia	14.5557	IL-17 signaling pathway	11.134	Mineral absorption	24.3753	Measles	12.8392	ECM-receptor interaction	18.7708	TNF signaling pathway	36.6014	Other glycan degradation	43.8929	HIF-1 signaling pathway	14.4038	Prostate cancer	10.6117
Fluid shear stress and atherosclerosis	20.2948	B cell receptor signaling pathway	22.7404	Human cytomegalovirus infection	40.2867	Toxoplasmosis	46.3871	Protein digestion and absorption	14.2295	Prion diseases	10.7371	Chemokine signaling pathway	23.0359	Phagosome	12.4873	Pathways in cancer	17.6907	Toxoplasmosis	33.0352	Chronic myeloid leukemia	42.1132	Rheumatoid arthritis	11.9704	Adherens junction	10.4847
Arginine biosynthesis	18.6833	Non-small cell lung cancer	22.0331	C-type lectin receptor signaling pathway	40.0332	Focal adhesion	45.3936	HIF-1 signaling pathway	14.1158	Human cytomegalovirus infection	9.96892	Regulation of actin cytoskeleton	22.1737	Legionellosis	12.1641	Fc gamma R-mediated phagocytosis	17.2512	Rheumatoid arthritis	31.3224	Legionellosis	40.0785	Galactose metabolism	11.7167	Melanoma	10.4847
Apoptosis	16.3076	Pathways in cancer	21.6928	Allograft rejection	39.8083	Phagosome	43.2119	Non-small cell lung cancer	13.3513	Toll-like receptor signaling pathway	9.65853	Cytokine-cytokine receptor interaction	21.4352	Influenza A	11.8648	Galactose metabolism	17.1127	Hepatitis B	29.7638	Toll-like receptor signaling pathway	39.9697	Legionellosis	11.3163	Platelet activation	10.4385
C-type lectin receptor signaling pathway	15.767	Human cytomegalovirus infection	21.5131	Viral myocarditis	39.6122	Chemokine signaling pathway	43.1002	Carbohydrate digestion and absorption	12.5322	Glucagon signaling pathway	9.17849	Fluid shear stress and atherosclerosis	21.3973	Hepatitis C	11.7957	Pentose phosphate pathway	17.1127	AGE-RAGE signaling pathway in diabetic complications	28.3722	Salmonella infection	39.8139	Prion diseases	10.5837	AGE-RAGE signaling pathway in diabetic complications	9.76339
PI3K-Akt signaling pathway	15.4429	ECM-receptor interaction	20.2067	Influenza A	39.0816	Proteoglycans in cancer	42.905	Mineral absorption	11.9638	Chagas disease (American trypanosomiasis)	9.0262	Bacterial invasion of epithelial cells	21.3134	Human cytomegalovirus infection	11.6946	Endometrial cancer	17.0265	Chemokine signaling pathway	28.251	Melanoma	38.9089	Cytosolic DNA-sensing pathway	10.3228	Glioma	9.67777
Adipocytokine signaling pathway	14.8224	Regulation of actin cytoskeleton	19.6343	Hematopoietic cell lineage	37.5265	Glycosaminoglycan degradation	41.6172	Melanoma	11.0363	African trypanosomiasis	8.72565	Protein digestion and absorption	20.4707	Kaposi sarcoma-associated herpesvirus infection	11.5505	Colorectal cancer	16.8986	NF-kappa B signaling pathway	27.6907	Kaposi sarcoma-associated herpesvirus infection	37.6036	Fructose and mannose metabolism	10.0769	Pancreatic cancer	9.67777
B cell receptor signaling pathway	14.3908	Rheumatoid arthritis	19.6213	IL-17 signaling pathway	35.4434	Pathways in cancer	40.0167	T cell receptor signaling pathway	10.8895	Glycine, serine and threonine metabolism	8.39418	Pertussis	19.9946	Fc gamma R-mediated phagocytosis	11.1651	Human papillomavirus infection	16.7975	Chagas disease (American trypanosomiasis)	27.0288	Glioma	35.6143	Chemokine signaling pathway	9.85313	Relaxin signaling pathway	9.43113
Transcriptional misregulation in cancer	14.2041	Malaria	19.2524	Natural killer cell mediated cytotoxicity	34.971	Relaxin signaling pathway	39.2943	FoxO signaling pathway	10.7394	C-type lectin receptor signaling pathway	7.80651	Kaposi sarcoma-associated herpesvirus infection	19.9088	B cell receptor signaling pathway	10.9856	Dilated cardiomyopathy (DCM)	16.2233	Bladder cancer	25.3829	Pertussis	34.5961	Proteoglycans in cancer	9.2057	Chronic myeloid leukemia	9.42745
Cell adhesion molecules (CAMs)	13.3866	FoxO signaling pathway	19.2495	B cell receptor signaling pathway	34.2891	Malaria	38.8366	Chemokine signaling pathway	10.7007	Cytokine-cytokine receptor interaction	7.60252	Relaxin signaling pathway	19.6485	Human immunodeficiency virus 1 infection	10.8915	AMPK signaling pathway	15.5734	Toll-like receptor signaling pathway	25.1278	Chemokine signaling pathway	34.2518	Glucagon signaling pathway	8.17447	Cytokine-cytokine receptor interaction	9.21861
Protein digestion and absorption	13.1261	Transcriptional misregulation in cancer	19.2268	Cytokine-cytokine receptor interaction	32.8545	Regulation of actin cytoskeleton	38.3141	Th17 cell differentiation	10.6363	Focal adhesion	7.54654	Amino sugar and nucleotide sugar metabolism	19.2524	AGE-RAGE signaling pathway in diabetic complications	10.6476	Prion diseases	15.5264	Human cytomegalovirus infection	25.0644	Viral carcinogenesis	32.1992	NF-kappa B signaling pathway	8.17447	HIF-1 signaling pathway	9.18465
Lysosome	12.4465	Fluid shear stress and atherosclerosis	18.2527	Measles	32.4826	Influenza A	36.5148	Chagas disease (American trypanosomiasis)	10.3902	Carbohydrate digestion and absorption	7.50897	Neomycin, kanamycin and gentamicin biosynthesis	18.6595	Intestinal immune network for IgA production	10.609	Fructose and mannose metabolism	14.8153	Measles	24.506	Human cytomegalovirus infection	29.6656	Apelin signaling pathway	8.09281	Galactose metabolism	8.00398
Primary immunodeficiency	12.3308	Osteoclast differentiation	17.6061	NOD-like receptor signaling pathway	31.8777	Acute myeloid leukemia	35.853	Fructose and mannose metabolism	10.2691	Natural killer cell mediated cytotoxicity	7.12134	Adipocytokine signaling pathway	18.5432	Non-small cell lung cancer	9.97566	Rap1 signaling pathway	14.3647	Sphingolipid metabolism	24.0086	Cytosolic DNA-sensing pathway	28.3706	Adipocytokine signaling pathway	7.76901	Gap junction	7.34102
Measles	11.737	Human T-cell leukemia virus 1 infection	17.254	Hepatitis B	31.6349	Human immunodeficiency virus 1 infection	34.0426	Glioma	10.0694	Regulation of actin cytoskeleton	6.37878	Fc gamma R-mediated phagocytosis	17.9834	Acute myeloid leukemia	9.6966	FoxO signaling pathway	14.2357	Hematopoietic cell lineage	23.8674	Small cell lung cancer	27.4821	p53 signaling pathway	7.76901	PI3K-Akt signaling pathway	7.22235
Neomycin, kanamycin and gentamicin biosynthesis	11.7159	Glioma	16.2281	Human immunodeficiency virus 1 infection	31.21	Chronic myeloid leukemia	33.3226	Human cytomegalovirus infection	9.89253	ABC transporters	6.32279	HIF-1 signaling pathway	17.3799	Malaria	9.64034	Human cytomegalovirus infection	13.8491	Malaria	22.9368	Hepatitis B	25.8188	Phagosome	7.64228	Fc gamma R-mediated phagocytosis	7.16737
Kaposi sarcoma-associated herpesvirus infection	11.6378	IL-17 signaling pathway	16.0455	Necroptosis	31.0956	Prostate cancer	32.5972	Human immunodeficiency virus 1 infection	9.81104	Type II diabetes mellitus	6.32279	Human cytomegalovirus infection	17.1264	Antigen processing and presentation	9.58311	Toll-like receptor signaling pathway	13.6094	Prostate cancer	22.0617	Colorectal cancer	24.8294	Hedgehog signaling pathway	6.76508	Fructose and mannose metabolism	6.83103
Leishmaniasis	10.7526	Human papillomavirus infection	15.8407	Pancreatic cancer	31.0454	Colorectal cancer	31.4031	Neomycin, kanamycin and gentamicin biosynthesis	9.71999	Amino sugar and nucleotide sugar metabolism	6.12016	Galactose metabolism	16.8018	Proteoglycans in cancer	9.55764	Alanine, aspartate and glutamate metabolism	13.5325	Mineral absorption	21.7801	Antigen processing and presentation	23.5538	C-type lectin receptor signaling pathway	6.74215	MAPK signaling pathway	6.57259
Leukocyte transendothelial migration	10.7017	Chronic myeloid leukemia	15.7049	Asthma	30.6072	Hepatitis C	31.1139	Amino sugar and nucleotide sugar metabolism	9.58072	Malaria	6.12016	Human immunodeficiency virus 1 infection	16.722	Adherens junction	9.44521	Thyroid cancer	13.5325	PI3K-Akt signaling pathway	21.616	Inflammatory bowel disease (IBD)	23.4618	Glycosphingolipid biosynthesis	6.49799	Small cell lung cancer	6.37524
Glycosaminoglycan biosynthesis	10.4992	Small cell lung cancer	15.6003	Staphylococcus aureus infection	27.4455	Rheumatoid arthritis	30.3667	NOD-like receptor signaling pathway	9.5734	Arginine and proline metabolism	5.92727	ECM-receptor interaction	16.0937	Focal adhesion	9.0888	Kaposi sarcoma-associated herpesvirus infection	13.4008	Leukocyte transendothelial migration	20.3825	Proteoglycans in cancer	21.69	Type II diabetes mellitus	5.7809	Chemokine signaling pathway	5.79785
Hypertrophic cardiomyopathy (HCM)	9.7461	Glycosaminoglycan degradation	15.324	AGE-RAGE signaling pathway in diabetic complications	27.1111	Human papillomavirus infection	29.8456	Aldosterone-regulated sodium reabsorption	8.71193	Cysteine and methionine metabolism	5.92727	Toxoplasmosis	15.7324	Chemokine signaling pathway	8.85672	AGE-RAGE signaling pathway in diabetic complications	13.1091	HIF-1 signaling pathway	18.4406	Human T-cell leukemia virus 1 infection	21.1398	JAK-STAT signaling pathway	5.51683	Non-small cell lung cancer	5.78941
Chagas disease (American trypanosomiasis)	9.63681	Phagosome	15.0875	Type I diabetes mellitus	26.8506	Thyroid cancer	29.7783	Hepatitis C	8.69675	Ras signaling pathway	5.5366	Acute myeloid leukemia	15.3469	Transcriptional misregulation in cancer	8.79015	Renal cell carcinoma	12.9034	Glioma	18.1823	Chagas disease (American trypanosomiasis)	20.9864	Arginine biosynthesis	5.47413	Hepatitis B	5.71653
Bladder cancer	9.56507	Insulin resistance	14.9768	Inflammatory bowel disease (IBD)	26.6751	NOD-like receptor signaling pathway	29.6084	Prostate cancer	8.29287	Glycosaminoglycan biosynthesis	5.40099	Glycosaminoglycan degradation	15.324	C-type lectin receptor signaling pathway	8.23523	Glucagon signaling pathway	12.8684	Fc epsilon RI signaling pathway	18.1424	C-type lectin receptor signaling pathway	20.8428	Lysosome	5.42572	Leishmaniasis	5.61701
MAPK signaling pathway	9.33863	PI3K-Akt signaling pathway	14.746	Hepatitis C	24.0311	IL-17 signaling pathway	28.8171	Kaposi sarcoma-associated herpesvirus infection	8.23342	Apelin signaling pathway	5.36732	Measles	15.1138	IL-17 signaling pathway	7.92004	African trypanosomiasis	12.4091	Epstein-Barr virus infection	18.0729	Fc gamma R-mediated phagocytosis	20.4637	Fc gamma R-mediated phagocytosis	5.20249	Renal cell carcinoma	5.4514
Colorectal cancer	9.24714	Bladder cancer	14.5718	Fluid shear stress and atherosclerosis	23.2715	MAPK signaling pathway	27.5105	Renal cell carcinoma	7.93685	Endocrine and other factor-regulated calcium reabsorption	5.08849	Hematopoietic cell lineage	14.7525	Human papillomavirus infection	7.43667	Fluid shear stress and atherosclerosis	12.1596	Amoebiasis	17.537	Glycosaminoglycan degradation	20.2767	Prostate cancer	4.15009	Bladder cancer	5.11955
Focal adhesion	8.84407	Fc gamma R-mediated phagocytosis	14.2731	Bacterial invasion of epithelial cells	22.5298	Epstein-Barr virus infection	27.4792	Thyroid hormone signaling pathway	7.91167	PI3K-Akt signaling pathway	4.96018	PI3K-Akt signaling pathway	14.746	Pathways in cancer	7.2985	Adipocytokine signaling pathway	11.9464	Acute myeloid leukemia	17.5111	Graft-versus-host disease	19.5692	Measles	3.87923	Primary bile acid biosynthesis	5.02952
Carbohydrate digestion and absorption	8.69305	Notch signaling pathway	13.928	Leukocyte transendothelial migration	22.043	FoxO signaling pathway	27.2774	Proteoglycans in cancer	7.67666	Cytosolic DNA-sensing pathway	4.29841	Sphingolipid metabolism	14.6054	p53 signaling pathway	7.26109	p53 signaling pathway	11.9464	Amino sugar and nucleotide sugar metabolism	17.1097	Human papillomavirus infection	19.3689	Histidine metabolism	3.73527	Adipocytokine signaling pathway	4.99187
Intestinal immune network for IgA production	8.69305	Bacterial invasion of epithelial cells	12.897	Systemic lupus erythematosus	20.4644	Leukocyte transendothelial migration	27.2322	Influenza A	7.60425	Glutathione metabolism	3.97047	Transcriptional misregulation in cancer	14.3498	Th17 cell differentiation	6.86588	Bile secretion	11.6498	Small cell lung cancer	16.9571	Pathways in cancer	18.9283	Chagas disease (American trypanosomiasis)	3.64957	Toxoplasmosis	4.49168
Pancreatic cancer	8.3919	Toll-like receptor signaling pathway	12.8573	Cell adhesion molecules (CAMs)	19.9953	PI3K-Akt signaling pathway	25.0927	Endocrine and other factor-regulated calcium reabsorption	7.47529	Leishmaniasis	3.67835	p53 signaling pathway	14.3052	Inflammatory bowel disease (IBD)	6.63914	Prolactin signaling pathway	11.6498	Kaposi sarcoma-associated herpesvirus infection	16.9346	Natural killer cell mediated cytotoxicity	18.2637	Focal adhesion	3.46163	Axon guidance	4.47528
Proteoglycans in cancer	8.36859	Hepatocellular carcinoma	12.7991	Regulation of actin cytoskeleton	19.9656	Fluid shear stress and atherosclerosis	24.5237	Bladder cancer	7.45426	Cell adhesion molecules (CAMs)	3.61357	B cell receptor signaling pathway	13.8163	Relaxin signaling pathway	6.60274	TNF signaling pathway	11.1453	Pathways in cancer	16.4066	AGE-RAGE signaling pathway in diabetic complications	17.8062	Folate biosynthesis	3.26363	Glycosphingolipid biosynthesis	4.29596
Pertussis	8.145	Measles	12.6177	Cytosolic DNA-sensing pathway	19.8796	Apelin signaling pathway	24.034	Porphyrin and chlorophyll metabolism	7.45426	Arrhythmogenic right ventricular cardiomyopathy (ARVC)	3.2575	Caffeine metabolism	13.8009	Bladder cancer	6.49392	Nucleotide excision repair	10.5416	Human immunodeficiency virus 1 infection	15.9807	Rheumatoid arthritis	17.5398	Human cytomegalovirus infection	3.22939	Transcriptional misregulation in cancer	4.29114
Tight junction	8.01577	Pertussis	12.0496	Human T-cell leukemia virus 1 infection	19.8543	Small cell lung cancer	23.9864	p53 signaling pathway	7.18724	Bile secretion	3.2575	NOD-like receptor signaling pathway	13.6293	Chronic myeloid leukemia	6.2793	Thyroid hormone signaling pathway	10.2252	C-type lectin receptor signaling pathway	15.1176	Relaxin signaling pathway	16.9134	Insulin resistance	3.1594	Salmonella infection	4.1017
Influenza A	7.8881	Hematopoietic cell lineage	11.6351	JAK-STAT signaling pathway	19.7937	HIF-1 signaling pathway	23.4735	Fc gamma R-mediated phagocytosis	7.11269	Prolactin signaling pathway	3.2575	Influenza A	13.5066	Regulation of actin cytoskeleton	6.25037	Proteoglycans in cancer	9.80765	Inflammatory bowel disease (IBD)	14.9315	Thyroid cancer	16.777	Leishmaniasis	3.05387	Phospholipase D signaling pathway	4.07603
Rap1 signaling pathway	7.70828	Acute myeloid leukemia	11.5509	Autoimmune thyroid disease	19.6594	Non-small cell lung cancer	23.3345	Th1 and Th2 cell differentiation	7.11269	Phagosome	3.22822	Systemic lupus erythematosus	12.8785	Mismatch repair	5.75399	Hepatitis C	9.67615	Pancreatic cancer	14.233	Type I diabetes mellitus	16.4546	Acute myeloid leukemia	2.87772	Gastric cancer	4.00978
Prostate cancer	7.35643	Cell cycle	10.9613	Bladder cancer	18.9972	Amoebiasis	22.276	Prolactin signaling pathway	6.95709	Calcium signaling pathway	2.9272	Epstein-Barr virus infection	12.7147	PI3K-Akt signaling pathway	5.62991	Nitrogen metabolism	9.3647	IL-17 signaling pathway	13.9919	Viral myocarditis	16.1037	Mucin type O-glycan biosynthesis	2.87439	Thyroid hormone signaling pathway	3.89111
Ras signaling pathway	7.35034	Colorectal cancer	10.7553	Prostate cancer	18.8194	Neurotrophin signaling pathway	20.569	Intestinal immune network for IgA production	6.74611	Salmonella infection	2.83959	Protein processing in endoplasmic reticulum	12.4875	Graft-versus-host disease	5.60984	Hepatitis B	9.3092	Sphingolipid signaling pathway	13.8182	Thyroid hormone signaling pathway	15.8864	Tight junction	2.71982	Sphingolipid metabolism	3.79369
Human cytomegalovirus infection	7.24463	MAPK signaling pathway	10.5223	Proteoglycans in cancer	18.0061	Human T-cell leukemia virus 1 infection	20.0865	Endocytosis	6.7409	RNA degradation	2.54825	Th17 cell differentiation	11.8552	Thyroid hormone signaling pathway	5.48918	JAK-STAT signaling pathway	9.19092	Natural killer cell mediated cytotoxicity	13.0711	Regulation of actin cytoskeleton	15.5153	Natural killer cell mediated cytotoxicity	2.69698	Amino sugar and nucleotide sugar metabolism	3.64412
Pentose phosphate pathway	7.23251	JAK-STAT signaling pathway	10.2356	Chronic myeloid leukemia	17.2698	Ras signaling pathway	19.6346	Thyroid hormone synthesis	6.73597	Proteoglycans in cancer	2.52895	C-type lectin receptor signaling pathway	11.4972	Vasopressin-regulated water reabsorption	5.35842	cAMP signaling pathway	9.0149	Human T-cell leukemia virus 1 infection	12.7764	p53 signaling pathway	15.3824	Influenza A	2.67976	Rheumatoid arthritis	3.4966
Central carbon metabolism in cancer	7.01442	Choline metabolism in cancer	10.093	Non-small cell lung cancer	16.2612	Cell cycle	19.6155	Necroptosis	6.664	Rheumatoid arthritis	2.4952	Pathways in cancer	11.487	Other glycan degradation	4.98296	Tight junction	8.84762	Staphylococcus aureus infection	12.4663	Allograft rejection	15.1014	B cell receptor signaling pathway	2.63798	Hippo signaling pathway	3.46819
Regulation of actin cytoskeleton	6.9164	Kaposi sarcoma-associated herpesvirus infection	9.84621	Adherens junction	16.1529	DNA replication	19.2121	Endometrial cancer	6.64412	Hypertrophic cardiomyopathy (HCM)	2.39374	Alcoholism	11.0155	Allograft rejection	4.93128	ErbB signaling pathway	8.77647	Central carbon metabolism in cancer	12.2284	Adherens junction	14.8784	Prolactin signaling pathway	2.63798	Hypertrophic cardiomyopathy (HCM)	3.32065
Steroid biosynthesis	6.81669	Influenza A	9.4815	African trypanosomiasis	15.809	ECM-receptor interaction	18.8635	IL-17 signaling pathway	6.37062	Rap1 signaling pathway	2.38014	Prostate cancer	10.6801	ECM-receptor interaction	4.82672	Influenza A	8.73689	Prolactin signaling pathway	12.0951	B cell receptor signaling pathway	14.8784	Circadian rhythm	2.54913	JAK-STAT signaling pathway	3.20509
Th17 cell differentiation	6.50975	Cytokine-cytokine receptor interaction	9.44203	Endocytosis	15.7633	Cytosolic DNA-sensing pathway	18.6999	TGF-beta signaling pathway	6.37062	Neuroactive ligand-receptor interaction	2.31773	Leukocyte transendothelial migration	10.666	Glioma	4.66701	Regulation of actin cytoskeleton	8.47308	N-Glycan biosynthesis	11.7394	Prolactin signaling pathway	14.8784	Bacterial invasion of epithelial cells	2.49267	Colorectal cancer	3.15583
Glycolysis / Gluconeogenesis	6.33097	Vasopressin-regulated water reabsorption	8.68995	Relaxin signaling pathway	15.0595	Protein processing in endoplasmic reticulum	18.6889	Toxoplasmosis	6.33526	Kaposi sarcoma-associated herpesvirus infection	2.22068	Antigen processing and presentation	10.1202	Viral carcinogenesis	4.22979	Malaria	8.43096	Endometrial cancer	11.4557	Focal adhesion	14.8237	Cell cycle	2.45069	Complement and coagulation cascades	3.15583
Fc gamma R-mediated phagocytosis	5.94468	Sphingolipid signaling pathway	8.54698	Glioma	14.4768	T cell receptor signaling pathway	18.5865	Axon guidance	6.24305	Dilated cardiomyopathy (DCM)	2.20782	Arginine biosynthesis	10.1064	Bacterial invasion of epithelial cells	4.1109	Hepatocellular carcinoma	8.41529	Bacterial invasion of epithelial cells	11.2666	TNF signaling pathway	14.3169	Pertussis	2.35771	Dilated cardiomyopathy (DCM)	3.00127
Epstein-Barr virus infection	5.89141	Riboflavin metabolism	8.40563	Acute myeloid leukemia	14.4636	Transcriptional misregulation in cancer	18.5496	Focal adhesion	6.20736	Staphylococcus aureus infection	2.0031	Small cell lung cancer	9.52773	DNA replication	4.02699	IL-17 signaling pathway	7.54001	Hepatitis C	11.235	NF-kappa B signaling pathway	13.7887	AMPK signaling pathway	2.3163	TGF-beta signaling pathway	2.92757
Complement and coagulation cascades	5.78324	Parathyroid hormone synthesis, secretion and action	8.08192	Riboflavin metabolism	13.4196	Bladder cancer	17.9458	Small cell lung cancer	6.19989	Glycerophospholipid metabolism	1.92871	Glycolysis / Gluconeogenesis	9.08639	JAK-STAT signaling pathway	3.90145	Axon guidance	7.53766	Fluid shear stress and atherosclerosis	10.9977	FoxO signaling pathway	13.5653	Pentose phosphate pathway	2.27436	Hepatocellular carcinoma	2.87528
Insulin resistance	5.3852	Protein digestion and absorption	7.63929	Sphingolipid metabolism	12.9727	Other glycan degradation	17.7021	JAK-STAT signaling pathway	5.99122	Pathways in cancer	1.85743	Inflammatory bowel disease (IBD)	8.89502	Melanoma	3.86262	Epstein-Barr virus infection	7.50683	Thyroid cancer	10.9022	Sphingolipid signaling pathway	12.9996	Transcriptional misregulation in cancer	2.15575	Regulation of lipolysis in adipocytes	2.79075
Adherens junction	5.36731	cAMP signaling pathway	7.61703	Galactose metabolism	12.4942	Endometrial cancer	16.8589	Salmonella infection	5.75134	Human immunodeficiency virus 1 infection	1.80171	Hepatitis B	8.61073	Endometrial cancer	3.75885	Glycosaminoglycan biosynthesis	7.34897	Protein processing in endoplasmic reticulum	10.5969	Staphylococcus aureus infection	12.9105	Starch and sucrose metabolism	2.15266	Hematopoietic cell lineage	2.71975
Bile secretion	5.36731	Phospholipase D signaling pathway	7.58171	Pathways in cancer	12.4183	Glioma	16.7618	Galactose metabolism	5.66567	AGE-RAGE signaling pathway in diabetic complications	1.79119	Endocytosis	8.35886	Viral myocarditis	3.7495	Transcriptional misregulation in cancer	7.27136	Chronic myeloid leukemia	10.5038	Prion diseases	12.8513	SNARE interactions in vesicular transport	2.15266	Regulation of actin cytoskeleton	2.718
Relaxin signaling pathway	5.26961	Axon guidance	7.5502	PI3K-Akt signaling pathway	12.3831	Central carbon metabolism in cancer	16.5325	Pentose phosphate pathway	5.66567	NF-kappa B signaling pathway	1.75897	Hepatitis C	7.4533	Protein digestion and absorption	3.73496	Ras signaling pathway	7.21563	Transcriptional misregulation in cancer	10.3287	Fc epsilon RI signaling pathway	12.6045	Relaxin signaling pathway	2.11193	Pathways in cancer	2.68741
Proximal tubule bicarbonate reclamation	5.21326	Ras signaling pathway	7.53639	Amoebiasis	12.1672	Sphingolipid signaling pathway	16.508	Pathways in cancer	5.62459	Parathyroid hormone synthesis, secretion and action	1.60945	Human T-cell leukemia virus 1 infection	7.39746	Hedgehog signaling pathway	3.71711	Cellular senescence	7.10046	Cytosolic DNA-sensing pathway	10.0957	Intestinal immune network for IgA production	12.1351	PI3K-Akt signaling pathway	2.05056	Endometrial cancer	2.59676
African trypanosomiasis	4.86057	Melanoma	7.51318	Transcriptional misregulation in cancer	12.1583	Adipocytokine signaling pathway	15.7091	Human T-cell leukemia virus 1 infection	5.58576	Toxoplasmosis	1.58169	Central carbon metabolism in cancer	7.21106	SNARE interactions in vesicular transport	3.69588	Hematopoietic cell lineage	7.08282	Neurotrophin signaling pathway	9.84762	Choline metabolism in cancer	11.597	RNA degradation	1.95423	Legionellosis	2.59676
Mannose type O-glycan biosynthesis	4.79641	Prolactin signaling pathway	7.51318	Mineral absorption	11.7996	p53 signaling pathway	15.7091	Central carbon metabolism in cancer	5.30279	TNF signaling pathway	1.52813	Graft-versus-host disease	7.21106	FoxO signaling pathway	3.68127	Glycosaminoglycan degradation	6.76238	Asthma	9.60137	Transcriptional misregulation in cancer	11.4792	Insulin signaling pathway	1.82887	VEGF signaling pathway	2.59676
Staphylococcus aureus infection	4.79006	Aldosterone-regulated sodium reabsorption	7.24733	SNARE interactions in vesicular transport	11.6243	Viral carcinogenesis	15.2688	Glutathione metabolism	5.30279	Leukocyte transendothelial migration	1.40477	MAPK signaling pathway	6.89505	Asthma	3.65034	Regulation of lipolysis in adipocytes	6.66367	Regulation of actin cytoskeleton	9.45946	Protein digestion and absorption	11.3518	Thyroid cancer	1.74816	Apelin signaling pathway	2.50435
Ferroptosis	4.61079	Apoptosis	7.23151	Colorectal cancer	11.4914	Th17 cell differentiation	15.2272	cAMP signaling pathway	5.18553	Thyroid hormone signaling pathway	1.40477	African trypanosomiasis	6.81519	Colorectal cancer	3.51663	Ovarian steroidogenesis	6.45546	Cell cycle	9.37556	Neurotrophin signaling pathway	11.0775	Complement and coagulation cascades	1.71939	Toll-like receptor signaling pathway	2.41277
Hepatitis C	4.52023	Neurotrophin signaling pathway	7.22002	Th17 cell differentiation	11.2451	Fc epsilon RI signaling pathway	14.0854	Malaria	5.08386	Endocytosis	1.36795	Pancreatic cancer	6.72115	Hematopoietic cell lineage	3.5004	Human T-cell leukemia virus 1 infection	6.42207	p53 signaling pathway	9.36042	JAK-STAT signaling pathway	10.9329	Fluid shear stress and atherosclerosis	1.70469	Glycosylphosphatidylinositol (GPI)-anchor biosynthesis	2.36622
Natural killer cell mediated cytotoxicity	4.48297	Central carbon metabolism in cancer	7.21106	Neomycin, kanamycin and gentamicin biosynthesis	10.9378	RIG-I-like receptor signaling pathway	14.0854	Pentose and glucuronate interconversions	5.00437	Sphingolipid signaling pathway	1.21505	Tight junction	6.4542	Neurotrophin signaling pathway	3.48848	Mismatch repair	6.2855	Human papillomavirus infection	9.34918	Necroptosis	10.7294	TGF-beta signaling pathway	1.59567	Cytosolic DNA-sensing pathway	2.3378
Cardiac muscle contraction	4.43866	Longevity regulating pathway	7.09493	Prion diseases	10.8284	Platelet activation	13.7594	N-Glycan biosynthesis	4.85992	AMPK signaling pathway	1.1777	Ferroptosis	6.41433	Amoebiasis	3.48496	Proximal tubule bicarbonate reclamation	6.2855	Melanoma	9.01866	Th17 cell differentiation	10.7133	NOD-like receptor signaling pathway	1.5895	Glycerolipid metabolism	2.3378
Salivary secretion	4.43866	Epstein-Barr virus infection	6.75776	Viral carcinogenesis	10.4394	Necroptosis	12.7678	ErbB signaling pathway	4.79017	Inflammatory mediator regulation of TRP channels	1.15961	Hypertrophic cardiomyopathy (HCM)	6.38382	Leukocyte transendothelial migration	3.48461	Legionellosis	6.25635	JAK-STAT signaling pathway	8.63062	Endocytosis	10.4889	African trypanosomiasis	1.58523	Systemic lupus erythematosus	2.2872
Inflammatory bowel disease (IBD)	4.41624	Viral carcinogenesis	6.75776	Focal adhesion	10.3596	Inflammatory bowel disease (IBD)	12.5428	NF-kappa B signaling pathway	4.75975	MAPK signaling pathway	1.11006	Histidine metabolism	6.20139	Endocytosis	3.48154	VEGF signaling pathway	6.25635	Prion diseases	8.30225	Central carbon metabolism in cancer	10.4424	Small cell lung cancer	1.55695	Glucagon signaling pathway	2.24915
Viral carcinogenesis	4.36099	Platelet activation	6.52363	Melanoma	10.0888	Insulin resistance	12.1565	Riboflavin metabolism	4.6485	Relaxin signaling pathway	1.09091	Apelin signaling pathway	6.10594	Cell adhesion molecules (CAMs)	3.44174	Breast cancer	6.20711	Apelin signaling pathway	8.17723	Human immunodeficiency virus 1 infection	9.9111	Ferroptosis	1.51163	Measles	2.2465
AGE-RAGE signaling pathway in diabetic complications	4.09748	Endometrial cancer	6.31853	MAPK signaling pathway	10.0584	Melanoma	12.0482	Fc epsilon RI signaling pathway	4.59236	Estrogen signaling pathway	1.04295	Porphyrin and chlorophyll metabolism	6.04195	Renal cell carcinoma	3.37752	Longevity regulating pathway	6.03382	Influenza A	7.96601	NOD-like receptor signaling pathway	9.64583	Glycine, serine and threonine metabolism	1.51163	Folate biosynthesis	2.20668
Amoebiasis	3.60911	VEGF signaling pathway	6.31853	Ras signaling pathway	9.76932	Rap1 signaling pathway	11.7735	Acute myeloid leukemia	4.43332	Insulin signaling pathway	0.969142	Insulin resistance	5.64071	Small cell lung cancer	3.29281	Phospholipase D signaling pathway	6.03116	Viral carcinogenesis	7.7997	Hepatocellular carcinoma	9.6321	Non-alcoholic fatty liver disease (NAFLD)	1.48541	Chagas disease (American trypanosomiasis)	2.19768
Non-alcoholic fatty liver disease (NAFLD)	3.541	Fc epsilon RI signaling pathway	6.12835	Neurotrophin signaling pathway	9.7357	Thyroid hormone synthesis	11.593	Fluid shear stress and atherosclerosis	4.38088	Systemic lupus erythematosus	0.915057	Cytosolic DNA-sensing pathway	5.52598	T cell receptor signaling pathway	3.28831	Non-alcoholic fatty liver disease (NAFLD)	5.8616	Cytokine-cytokine receptor interaction	7.69202	Gap junction	9.54404	Bladder cancer	1.44269	Calcium signaling pathway	2.19363
Collecting duct acid secretion	3.52015	Hippo signaling pathway	6.1122	Primary immunodeficiency	9.42828	Gap junction	11.4359	Transcriptional misregulation in cancer	4.31832	Fluid shear stress and atherosclerosis	0.915057	Amyotrophic lateral sclerosis (ALS)	5.42396	Type I diabetes mellitus	3.1274	Terpenoid backbone biosynthesis	5.85819	Riboflavin metabolism	7.64447	ABC transporters	9.45666	Carbohydrate digestion and absorption	1.31728	Basal cell carcinoma	2.18372
Human T-cell leukemia virus 1 infection	3.49608	Inflammatory bowel disease (IBD)	6.04046	Complement and coagulation cascades	9.16985	Cholinergic synapse	11.1849	Thyroid cancer	4.19064	Breast cancer	0.864926	Intestinal immune network for IgA production	5.3729	Th1 and Th2 cell differentiation	3.09002	Cytosolic DNA-sensing pathway	5.70862	FoxO signaling pathway	7.53487	Sphingolipid metabolism	9.45666	Mineral absorption	1.26015	Breast cancer	2.12943
Non-small cell lung cancer	3.40076	N-Glycan biosynthesis	6.00023	Fc epsilon RI signaling pathway	9.09602	Renal cell carcinoma	11.0519	Cellular senescence	4.17436	Human papillomavirus infection	0.667142	Fructose and mannose metabolism	5.05624	Notch signaling pathway	3.00359	Amoebiasis	5.58698	Gap junction	7.47795	Parathyroid hormone synthesis, secretion and action	9.40697	Cell adhesion molecules (CAMs)	1.08568	Collecting duct acid secretion	2.06206
Viral myocarditis	3.38422	Hepatitis C	5.98257	Human papillomavirus infection	8.90828	Hematopoietic cell lineage	10.8797	Proximal tubule bicarbonate reclamation	4.12511	Tight junction	0.662032	Drug metabolism	5.03771	Sphingolipid signaling pathway	2.97371	Parathyroid hormone synthesis, secretion and action	5.48222	Ras signaling pathway	7.31404	Th1 and Th2 cell differentiation	9.25853	Amino sugar and nucleotide sugar metabolism	1.01985	Amoebiasis	2.05172
Taurine and hypotaurine metabolism	3.36765	Adipocytokine signaling pathway	5.43835	ECM-receptor interaction	8.5836	Cellular senescence	10.7219	Bile secretion	3.99475	Influenza A	0.653611	Glycosphingolipid biosynthesis	4.79107	Axon guidance	2.92254	Toxoplasmosis	5.38006	Primary immunodeficiency	7.26793	Cellular senescence	9.1901	Cholesterol metabolism	1.01985	Parathyroid hormone synthesis, secretion and action	2.00572
FoxO signaling pathway	3.2919	Prion diseases	5.4174	Central carbon metabolism in cancer	8.11702	Thyroid hormone signaling pathway	10.5838	Cytokine-cytokine receptor interaction	3.9866	cGMP-PKG signaling pathway	0.621289	Collecting duct acid secretion	4.77157	TGF-beta signaling pathway	2.89346	Cushing syndrome	5.24154	Colorectal cancer	6.99931	Amino sugar and nucleotide sugar metabolism	9.01299	Arginine and proline metabolism	0.979381	Glycolysis / Gluconeogenesis	1.91308
Mucin type O-glycan biosynthesis	3.27485	TGF-beta signaling pathway	5.40912	Endometrial cancer	7.87063	Prion diseases	10.2079	PI3K-Akt signaling pathway	3.97218	Alzheimer disease	0.598396	Human papillomavirus infection	4.57228	Cell cycle	2.65466	Insulin resistance	5.1832	Complement and coagulation cascades	6.99931	Ras signaling pathway	8.99667	Axon guidance	0.92645	Human T-cell leukemia virus 1 infection	1.90463
Fc epsilon RI signaling pathway	3.16509	Carbohydrate digestion and absorption	5.3729	Pyrimidine metabolism	7.87063	VEGF signaling pathway	9.96213	MAPK signaling pathway	3.88935	Tuberculosis	0.576583	Chronic myeloid leukemia	4.47509	One carbon pool by folate	2.55666	Glycosylphosphatidylinositol (GPI)-anchor biosynthesis	5.126	Adipocytokine signaling pathway	6.75486	Autoimmune thyroid disease	8.95288	Thyroid hormone signaling pathway	0.919293	Insulin resistance	1.87509
Renal cell carcinoma	3.16509	Tight junction	5.15092	T cell receptor signaling pathway	7.54099	Natural killer cell mediated cytotoxicity	9.74593	Regulation of lipolysis in adipocytes	3.7479	Axon guidance	0.562608	Non-small cell lung cancer	4.44632	African trypanosomiasis	2.52805	C-type lectin receptor signaling pathway	4.99577	Antigen processing and presentation	6.55458	Platelet activation	7.87815	Cellular senescence	0.857029	Hepatitis C	1.6981
NOD-like receptor signaling pathway	3.11261	Hedgehog signaling pathway	5.07201	Sphingolipid signaling pathway	7.36127	Prolactin signaling pathway	9.40228	Relaxin signaling pathway	3.7404	NOD-like receptor signaling pathway	0.41957	Protein export	4.38962	Cellular senescence	2.34629	Protein processing in endoplasmic reticulum	4.96288	Adherens junction	6.49756	Asthma	7.76938	Calcium signaling pathway	0.805757	Wnt signaling pathway	1.6981
Antigen processing and presentation	3.10123	Arginine biosynthesis	4.57142	Protein processing in endoplasmic reticulum	7.23167	Endocytosis	9.26152	Bacterial invasion of epithelial cells	3.73131	Herpes simplex virus 1 infection	0.399543	Viral myocarditis	4.3716	Ras signaling pathway	2.31923	Folate biosynthesis	4.81069	MAPK signaling pathway	6.4614	PI3K-Akt signaling pathway	7.69246	Platelet activation	0.744492	p53 signaling pathway	1.68415
Dilated cardiomyopathy (DCM)	3.10123	Natural killer cell mediated cytotoxicity	4.50307	HIF-1 signaling pathway	6.85551	JAK-STAT signaling pathway	9.04928	Gastric acid secretion	3.73131	Viral carcinogenesis	0.322865	Synaptic vesicle cycle	4.30631	Cholinergic synapse	2.30924	Glycolysis / Gluconeogenesis	4.79847	Cell adhesion molecules (CAMs)	6.2457	Hematopoietic cell lineage	7.51486	VEGF signaling pathway	0.721513	Arrhythmogenic right ventricular cardiomyopathy (ARVC)	1.63246
Type I diabetes mellitus	3.05474	MicroRNAs in cancer	4.26255	Herpes simplex virus 1 infection	6.81372	Sphingolipid metabolism	8.85995	Ferroptosis	3.54086			Colorectal cancer	4.22146	Prion diseases	2.27866	Fc epsilon RI signaling pathway	4.66677	T cell receptor signaling pathway	6.23077	Hedgehog signaling pathway	7.2455	Endometrial cancer	0.721513	Bile secretion	1.63246
Fatty acid elongation	3.05199	Renal cell carcinoma	4.0834	RIG-I-like receptor signaling pathway	6.81052	Th1 and Th2 cell differentiation	8.80724	Synaptic vesicle cycle	3.37404			Complement and coagulation cascades	4.22146	Parathyroid hormone synthesis, secretion and action	2.27755	Acute myeloid leukemia	4.54002	Morphine addiction	6.14096	Mineral absorption	7.2455	Pyrimidine metabolism	0.721513	Prolactin signaling pathway	1.63246
MicroRNAs in cancer	2.99849	Cocaine addiction	4.0526	Amino sugar and nucleotide sugar metabolism	6.25375	Gastric acid secretion	8.68266	Signaling pathways regulating pluripotency of stem cells	3.27908			FoxO signaling pathway	4.14792	HIF-1 signaling pathway	2.2618	Cell adhesion molecules (CAMs)	4.51888	Primary bile acid biosynthesis	5.85413	Bacterial invasion of epithelial cells	7.239	Inflammatory bowel disease (IBD)	0.695882	Glyoxylate and dicarboxylate metabolism	1.60007
Small cell lung cancer	2.92803	Human immunodeficiency virus 1 infection	3.95372	Adipocytokine signaling pathway	5.98395	Vasopressin-regulated water reabsorption	8.30327	Salivary secretion	3.2641			Renal cell carcinoma	4.0834	Cytosolic DNA-sensing pathway	2.252	B cell receptor signaling pathway	4.18709	Ferroptosis	5.63583	Gastric acid secretion	7.239	Lysine degradation	0.695882	Natural killer cell mediated cytotoxicity	1.57399
p53 signaling pathway	2.84773	C-type lectin receptor signaling pathway	3.90886	FoxO signaling pathway	5.91	GnRH signaling pathway	7.9332	Apelin signaling pathway	3.20851			Pyrimidine metabolism	4.04702	Longevity regulating pathway	2.10376	Cell cycle	4.10954	Necroptosis	5.51653	Long-term potentiation	6.36142	Glycerolipid metabolism	0.648087	Pentose phosphate pathway	1.5075
Hepatitis B	2.814	African trypanosomiasis	3.87571	VEGF signaling pathway	5.61413	Protein digestion and absorption	7.9332	Natural killer cell mediated cytotoxicity	3.18806			Type I diabetes mellitus	3.91454	Fc epsilon RI signaling pathway	2.08431	MAPK signaling pathway	4.10427	Platelet activation	5.49475	Renal cell carcinoma	6.11969	FoxO signaling pathway	0.645586	Kaposi sarcoma-associated herpesvirus infection	1.48887
Arrhythmogenic right ventricular cardiomyopathy (ARVC)	2.75059	Lysine degradation	3.85914	Amyotrophic lateral sclerosis (ALS)	5.29302	Hepatocellular carcinoma	7.76681	Hippo signaling pathway	3.18392			T cell receptor signaling pathway	3.91376	Hippo signaling pathway	2.07769	Sphingolipid signaling pathway	4.0395	VEGF signaling pathway	5.48627	Cholinergic synapse	6.04323	Neuroactive ligand-receptor interaction	0.64219	Influenza A	1.48317
Prolactin signaling pathway	2.75059	Th17 cell differentiation	3.79085	Glycosphingolipid biosynthesis	5.28063	Parathyroid hormone synthesis, secretion and action	7.23153	Cytosolic DNA-sensing pathway	3.05369			Viral carcinogenesis	3.75472	MAPK signaling pathway	2.06489	Fatty acid elongation	4.02146	RIG-I-like receptor signaling pathway	5.28795	IL-17 signaling pathway	5.90315	Basal cell carcinoma	0.60448	Cell adhesion molecules (CAMs)	1.43443
Biosynthesis of unsaturated fatty acids	2.49366	p53 signaling pathway	3.59978	Arginine biosynthesis	5.1082	Breast cancer	6.68797	Human papillomavirus infection	3.00803			Hippo signaling pathway	3.72503	Natural killer cell mediated cytotoxicity	2.06242	Pertussis	3.77257	SNARE interactions in vesicular transport	5.12569	Aldosterone-regulated sodium reabsorption	5.89052	MicroRNAs in cancer	0.603924	SNARE interactions in vesicular transport	1.42219
Galactose metabolism	2.49366	Neomycin, kanamycin and gentamicin biosynthesis	3.52344	Pentose phosphate pathway	5.03837	cAMP signaling pathway	6.47061	Folate biosynthesis	2.96357			Morphine addiction	3.67471	N-Glycan biosynthesis	2.01726	Biosynthesis of unsaturated fatty acids	3.41039	Amyotrophic lateral sclerosis (ALS)	4.71345	Gastric cancer	5.83227	Graft-versus-host disease	0.5841	Cell cycle	1.41517
Adrenergic signaling in cardiomyocytes	2.34613	Gastric cancer	3.50382	Apelin signaling pathway	5.01527	Phospholipase D signaling pathway	6.36171	Viral carcinogenesis	2.88311			N-Glycan biosynthesis	3.63434	Mineral absorption	2.00365	Chemokine signaling pathway	3.20897	Systemic lupus erythematosus	4.51033	Apelin signaling pathway	5.82891	Ubiquitin mediated proteolysis	0.573007	Pentose and glucuronate interconversions	1.34341
SNARE interactions in vesicular transport	2.33779	Other types of O-glycan biosynthesis	3.31942	Glycosaminoglycan biosynthesis	5.01091	Antigen processing and presentation	6.17037	Cell cycle	2.82486			Ras signaling pathway	3.49042	Protein processing in endoplasmic reticulum	1.99395	Apelin signaling pathway	3.20279	Th17 cell differentiation	4.45853	Leukocyte transendothelial migration	5.73356	Human papillomavirus infection	0.566274	Prion diseases	1.34341
Glucagon signaling pathway	2.21423	Gastric acid secretion	3.17905	Small cell lung cancer	4.73419	Tight junction	5.99888	ECM-receptor interaction	2.77384			Adherens junction	3.45305	NOD-like receptor signaling pathway	1.9602	Rheumatoid arthritis	3.09636	Hedgehog signaling pathway	4.42679	HIF-1 signaling pathway	5.63338	Non-small cell lung cancer	0.545929	AMPK signaling pathway	1.32902
Prion diseases	2.19443	Glycosaminoglycan biosynthesis	3.09721	p53 signaling pathway	4.31038	Amino sugar and nucleotide sugar metabolism	5.83656	Collecting duct acid secretion	2.74356			Melanoma	3.45305	Apelin signaling pathway	1.94422	Pentose and glucuronate interconversions	3.07609	Rap1 signaling pathway	4.3843	African trypanosomiasis	5.54446	Kaposi sarcoma-associated herpesvirus infection	0.537945	Epstein-Barr virus infection	1.24285
Human papillomavirus infection	2.15451	Phosphatidylinositol signaling system	2.9926	Ribosome	4.17664	Notch signaling pathway	5.83656	Ras signaling pathway	2.71053			Bladder cancer	3.41102	Insulin resistance	1.88207	Base excision repair	2.92666	Collecting duct acid secretion	4.22043	MAPK signaling pathway	5.45054	Regulation of actin cytoskeleton	0.530146	MicroRNAs in cancer	1.22722
Fructose and mannose metabolism	2.06231	Estrogen signaling pathway	2.89152	Prolactin signaling pathway	4.12111	Choline metabolism in cancer	5.8252	Platelet activation	2.6927			Staphylococcus aureus infection	3.31495	Primary immunodeficiency	1.75523	DNA replication	2.92666	Thyroid hormone signaling pathway	4.10692	Amoebiasis	5.32392	Renal cell carcinoma	0.510907	RNA degradation	1.17706
Endometrial cancer	1.99839	Breast cancer	2.80731	N-Glycan biosynthesis	3.91151	Salivary secretion	5.59791	Breast cancer	2.64341			JAK-STAT signaling pathway	3.31385	Central carbon metabolism in cancer	1.71756	Steroid hormone biosynthesis	2.75447	Phospholipase D signaling pathway	3.8875	N-Glycan biosynthesis	5.32314	Type I diabetes mellitus	0.494473	FoxO signaling pathway	1.17459
Pyrimidine metabolism	1.99839	Rap1 signaling pathway	2.7346	Protein digestion and absorption	3.77944	Mineral absorption	5.24542	Amoebiasis	2.56685			Natural killer cell mediated cytotoxicity	3.27394	VEGF signaling pathway	1.67773	Progesterone-mediated oocyte maturation	2.6922	NOD-like receptor signaling pathway	3.81592	ECM-receptor interaction	5.30296	Phospholipase D signaling pathway	0.463315	Thyroid cancer	1.14013
RNA degradation	1.90532	Salivary secretion	2.69992	Cell cycle	3.77898	Estrogen signaling pathway	5.09898	RNA polymerase	2.54469			Allograft rejection	3.20059	Thyroid cancer	1.5394	Gastric cancer	2.65418	Parathyroid hormone synthesis, secretion and action	3.80964	Glycerophospholipid metabolism	4.90853	Gastric cancer	0.454614	Cellular senescence	1.12171
Hippo signaling pathway	1.87077	Cellular senescence	2.69883	Rap1 signaling pathway	3.76933	Amyotrophic lateral sclerosis (ALS)	4.92617	Hepatocellular carcinoma	2.5204			Pentose phosphate pathway	3.19463	Necroptosis	1.42562	Chemical carcinogenesis	2.46091	Th1 and Th2 cell differentiation	3.70401	Breast cancer	4.75019	Adherens junction	0.44905	Signaling pathways regulating pluripotency of stem cells	1.06177
Human immunodeficiency virus 1 infection	1.8569	Apelin signaling pathway	2.59054	Nicotinate and nicotinamide metabolism	3.69285	Non-homologous end-joining	4.8949	Metabolism of xenobiotics by cytochrome P450	2.50969			Glioma	3.05111	Homologous recombination	1.3751	Hippo signaling pathway	2.31834	Synaptic vesicle cycle	3.66757	Cell cycle	4.65699	Arrhythmogenic right ventricular cardiomyopathy (ARVC)	0.44905	Viral myocarditis	1.05162
Alanine, aspartate and glutamate metabolism	1.82746	Ubiquitin mediated proteolysis	2.59054	Platelet activation	3.55041	Galactose metabolism	4.72518	Gastric cancer	2.47992			Carbohydrate digestion and absorption	3.01096	Gap junction	1.33863	Ferroptosis	2.31704	African trypanosomiasis	3.38102	Proximal tubule bicarbonate reclamation	4.58188	Bile secretion	0.44905	Insulin signaling pathway	1.02021
Thyroid cancer	1.82746	AMPK signaling pathway	2.58966	Renal cell carcinoma	3.43931	African trypanosomiasis	4.6433	Glycolysis / Gluconeogenesis	2.41531			SNARE interactions in vesicular transport	2.96083	cAMP signaling pathway	1.27705	Glycine, serine and threonine metabolism	2.31704	MicroRNAs in cancer	3.34887	Phospholipase D signaling pathway	4.54045	Melanoma	0.44905	Steroid hormone biosynthesis	0.995073
Cytosolic DNA-sensing pathway	1.76521	Endocytosis	2.2751	Thyroid cancer	3.42539	Autophagy	4.5551	Sphingolipid metabolism	2.33857			Pentose and glucuronate interconversions	2.74741	GnRH signaling pathway	1.25951	Porphyrin and chlorophyll metabolism	2.21733	GnRH signaling pathway	3.32179	Biosynthesis of unsaturated fatty acids	4.53296	Epstein-Barr virus infection	0.445683	Ferroptosis	0.97647
Primary bile acid biosynthesis	1.7361	Thyroid cancer	2.20917	Primary bile acid biosynthesis	3.2775	TGF-beta signaling pathway	4.51253	RIG-I-like receptor signaling pathway	2.32513			Rap1 signaling pathway	2.7346	Glycosphingolipid biosynthesis	1.24171	Choline metabolism in cancer	2.20714	Cholesterol metabolism	3.31986	Galactose metabolism	4.53296	Inositol phosphate metabolism	0.435095	Porphyrin and chlorophyll metabolism	0.928978
Insulin secretion	1.73067	Staphylococcus aureus infection	2.2037	Alcoholism	3.16785	Long-term depression	4.48095	Oxytocin signaling pathway	2.27869			Platelet activation	2.66646	Amyotrophic lateral sclerosis (ALS)	1.16133	Viral carcinogenesis	2.20545	Neomycin, kanamycin and gentamicin biosynthesis	3.21019	Pentose phosphate pathway	4.53296	Gastric acid secretion	0.421683	Staphylococcus aureus infection	0.846344
Protein processing in endoplasmic reticulum	1.72466	Primary bile acid biosynthesis	2.1897	Histidine metabolism	2.92034	ErbB signaling pathway	4.39377	Progesterone-mediated oocyte maturation	2.22439			Dilated cardiomyopathy (DCM)	2.6456	Autoimmune thyroid disease	1.15741	Basal transcription factors	2.03547	Cholinergic synapse	3.15975	Neomycin, kanamycin and gentamicin biosynthesis	4.53133	Oxytocin signaling pathway	0.421645	Basal transcription factors	0.842864
Aldosterone-regulated sodium reabsorption	1.72289	Bile secretion	2.13108	Cellular senescence	2.88153	Ferroptosis	4.33156	Non-homologous end-joining	2.02043			GABAergic synapse	2.6456	Salivary secretion	1.15741	Carbohydrate digestion and absorption	2.03547	Hippo signaling pathway	3.03597	Herpes simplex virus 1 infection	4.50009	Glioma	0.408789	Carbohydrate digestion and absorption	0.842864
Apelin signaling pathway	1.68415	ErbB signaling pathway	2.12181	Hepatocellular carcinoma	2.59441	Melanogenesis	4.31473	Leukocyte transendothelial migration	2.01885			Fc epsilon RI signaling pathway	2.54795	Selenocompound metabolism	1.15057	Intestinal immune network for IgA production	2.03547	Porphyrin and chlorophyll metabolism	2.96432	Carbohydrate digestion and absorption	4.38778	Pancreatic cancer	0.408789	Intestinal immune network for IgA production	0.842864
Th1 and Th2 cell differentiation	1.67664	Collecting duct acid secretion	2.05515	Cholesterol metabolism	2.5767	Gastric cancer	4.09707	Amyotrophic lateral sclerosis (ALS)	1.92883			Asthma	2.47302	Amino sugar and nucleotide sugar metabolism	1.13112	Chagas disease (American trypanosomiasis)	2.02821	Cellular senescence	2.82362	T cell receptor signaling pathway	4.34936	Chronic myeloid leukemia	0.396387	Non-alcoholic fatty liver disease (NAFLD)	0.806877
Insulin signaling pathway	1.64619	Glycerophospholipid metabolism	2.04936	Glycolysis / Gluconeogenesis	2.39976	Mitophagy	4.05357	Biosynthesis of unsaturated fatty acids	1.91443			Endometrial cancer	2.39116	Cholesterol metabolism	1.13112	Human immunodeficiency virus 1 infection	1.99394	Biosynthesis of unsaturated fatty acids	2.79664	GnRH signaling pathway	4.19989	Hippo signaling pathway	0.384229	Mineral absorption	0.803769
Drug metabolism	1.60603	Thyroid hormone synthesis	2.0389	Folate biosynthesis	2.377	Longevity regulating pathway	4.01914	Staphylococcus aureus infection	1.90806			Thyroid cancer	2.20917	Prolactin signaling pathway	1.10356	Hedgehog signaling pathway	1.95241	Galactose metabolism	2.79664	Progesterone-mediated oocyte maturation	4.19989	Hepatitis C	0.37721	Rap1 signaling pathway	0.767616
Graft-versus-host disease	1.56413	Hypertrophic cardiomyopathy (HCM)	1.95979	Tight junction	2.25323	Hippo signaling pathway	4.01814	mRNA surveillance pathway	1.85111			Primary bile acid biosynthesis	2.1897	Platelet activation	1.07094	Pancreatic secretion	1.94577	Allograft rejection	2.73117	Endocrine and other factor-regulated calcium reabsorption	4.17574	Human T-cell leukemia virus 1 infection	0.355146	Choline metabolism in cancer	0.762024
TGF-beta signaling pathway	1.47908	Insulin secretion	1.95979	Phospholipase D signaling pathway	2.22902	Cell adhesion molecules (CAMs)	3.7551	Glycosaminoglycan biosynthesis	1.84047			Cell adhesion molecules (CAMs)	2.14109	Dopaminergic synapse	1.06537	cGMP-PKG signaling pathway	1.92076	Carbohydrate digestion and absorption	2.60652	Tight junction	4.05705	Gap junction	0.294899	T cell receptor signaling pathway	0.72366
Porphyrin and chlorophyll metabolism	1.45166	Signaling pathways regulating pluripotency of stem cells	1.8791	Gap junction	2.22314	Mismatch repair	3.40595	Herpes simplex virus 1 infection	1.73443			Bile secretion	2.13108	Riboflavin metabolism	1.06384	Glycosphingolipid biosynthesis	1.87405	Intestinal immune network for IgA production	2.60652	Autophagy	3.89232	Hypertrophic cardiomyopathy (HCM)	0.294899	Cushing syndrome	0.69296
cGMP-PKG signaling pathway	1.43857	Basal cell carcinoma	1.86058	Hypertrophic cardiomyopathy (HCM)	2.22314	Long-term potentiation	3.32543	Pertussis	1.73033			Prolactin signaling pathway	2.13108	Neomycin, kanamycin and gentamicin biosynthesis	1.05486	Ether lipid metabolism	1.7301	Graft-versus-host disease	2.60362	Fluid shear stress and atherosclerosis	3.87954	Insulin secretion	0.294899	ABC transporters	0.669285
Necroptosis	1.32797	Melanogenesis	1.83867	Carbohydrate digestion and absorption	2.21703	Hedgehog signaling pathway	3.30265	Prion diseases	1.67455			Cholesterol metabolism	2.10163	Choline metabolism in cancer	1.03839	ABC transporters	1.6639	Tight junction	2.49038	Systemic lupus erythematosus	3.87954	Viral myocarditis	0.286624	Cocaine addiction	0.669285
Sphingolipid signaling pathway	1.24001	Cholinergic synapse	1.80789	Steroid biosynthesis	2.18725	Cytokine-cytokine receptor interaction	3.1261	Regulation of actin cytoskeleton	1.6517			Ascorbate and aldarate metabolism	2.05515	Glycosaminoglycan biosynthesis	1.03781	Sphingolipid metabolism	1.6639	Histidine metabolism	2.39833	Cell adhesion molecules (CAMs)	3.80716	Necroptosis	0.282574	Linoleic acid metabolism	0.613019
cAMP signaling pathway	1.164	Pantothenate and CoA biosynthesis	1.68998	Fructose and mannose metabolism	2.17221	Systemic lupus erythematosus	3.11039	DNA replication	1.56896			Thyroid hormone synthesis	2.0389	Autophagy	0.955001	Leukocyte transendothelial migration	1.59237	Endocrine and other factor-regulated calcium reabsorption	2.38766	Histidine metabolism	3.80016	Colorectal cancer	0.278632	Tight junction	0.596843
Endocytosis	1.14967	Antigen processing and presentation	1.67369	Collecting duct acid secretion	2.15078	Glycosphingolipid biosynthesis	3.09071	cGMP-PKG signaling pathway	1.56577			Dopaminergic synapse	1.99184	Synaptic vesicle cycle	0.941918	Endocytosis	1.42628	Glycosphingolipid biosynthesis	2.29779	VEGF signaling pathway	3.62762	Herpes simplex virus 1 infection	0.266036	Viral carcinogenesis	0.565164
Melanoma	1.14781	Dilated cardiomyopathy (DCM)	1.67369	Th1 and Th2 cell differentiation	2.12834	Glycosaminoglycan biosynthesis	3.03886	Longevity regulating pathway	1.547			Arginine and proline metabolism	1.98297	Gastric acid secretion	0.914335	Neurotrophin signaling pathway	1.41907	Salivary secretion	2.27107	Renin-angiotensin system	3.43805	Antigen processing and presentation	0.263452	Amyotrophic lateral sclerosis (ALS)	0.562737
Inositol phosphate metabolism	1.10554	Morphine addiction	1.5474	Protein export	1.94944	Hypertrophic cardiomyopathy (HCM)	2.9198	Primary immunodeficiency	1.47167			Gap junction	1.95979	Hepatocellular carcinoma	0.901481	Platelet activation	1.3166	Hepatocellular carcinoma	2.25485	ErbB signaling pathway	3.38842	Pathways in cancer	0.220504	cGMP-PKG signaling pathway	0.544374
Thyroid hormone synthesis	1.10554	Endocrine and other factor-regulated calcium reabsorption	1.49217	Insulin resistance	1.74978	Insulin secretion	2.9198	Non-alcoholic fatty liver disease (NAFLD)	1.47124			Sphingolipid signaling pathway	1.90137	Long-term depression	0.888732	Osteoclast differentiation	1.24577	Endocytosis	2.19741	Caffeine metabolism	3.34257	Glycerophospholipid metabolism	0.217675	Necroptosis	0.506075
T cell receptor signaling pathway	1.09117	Intestinal immune network for IgA production	1.462	Morphine addiction	1.71225	Axon guidance	2.91095	Pyrimidine metabolism	1.4654			Cholinergic synapse	1.80789	Pyrimidine metabolism	0.857828	NOD-like receptor signaling pathway	1.22859	Renal cell carcinoma	2.15504	Insulin resistance	3.32903	Phosphatidylinositol signaling system	0.21195	Pyrimidine metabolism	0.440479
Bacterial invasion of epithelial cells	1.06507	RIG-I-like receptor signaling pathway	1.45649	Type II diabetes mellitus	1.56748	Oxytocin signaling pathway	2.90125	Pancreatic secretion	1.41617			Glutathione metabolism	1.77089	RIG-I-like receptor signaling pathway	0.857481	Autophagy	1.20117	Renin-angiotensin system	2.05997	Cocaine addiction	3.32605	Th17 cell differentiation	0.190786	Inflammatory bowel disease (IBD)	0.423511
Longevity regulating pathway	1.05914	Wnt signaling pathway	1.41448	Cholinergic synapse	1.55854	cGMP-PKG signaling pathway	2.85453	Primary bile acid biosynthesis	1.37295			Fatty acid elongation	1.7204	Rap1 signaling pathway	0.848713	Relaxin signaling pathway	1.17961	Type I diabetes mellitus	2.05657	Protein processing in endoplasmic reticulum	3.31713	Longevity regulating pathway	0.190786	Sphingolipid signaling pathway	0.412567
Glycosaminoglycan degradation	1.02998	Galactose metabolism	1.33278	Axon guidance	1.55766	Alcoholism	2.81171	RNA degradation	1.35088			Thyroid hormone signaling pathway	1.69138	beta-Alanine metabolism	0.786341	Spliceosome	1.15853	Pancreatic secretion	1.94608	Long-term depression	3.16136	Pancreatic secretion	0.17656	Human cytomegalovirus infection	0.383196
Glioma	1.02632	NOD-like receptor signaling pathway	1.25579	Proximal tubule bicarbonate reclamation	1.5102	Histidine metabolism	2.73946	Parathyroid hormone synthesis, secretion and action	1.33576			Axon guidance	1.67091	Cytokine-cytokine receptor interaction	0.76803	Inflammatory bowel disease (IBD)	1.12148	Bile secretion	1.78919	Cholesterol metabolism	3.15221	Parathyroid hormone synthesis, secretion and action	0.167775	Mitophagy	0.363334
ABC transporters	0.999701	Non-alcoholic fatty liver disease (NAFLD)	1.24848	Thyroid hormone signaling pathway	1.44253	MicroRNAs in cancer	2.73477	Rap1 signaling pathway	1.22362			Glycosaminoglycan biosynthesis	1.67	Arginine biosynthesis	0.734229	Estrogen signaling pathway	1.11776	Aldosterone-regulated sodium reabsorption	1.77863	Malaria	3.15221	Toxoplasmosis	0.163578	Autophagy	0.359151
Sphingolipid metabolism	0.999701	Sulfur metabolism	1.21585	Caffeine metabolism	1.39696	Basal cell carcinoma	2.71349	Gap junction	1.21803			Riboflavin metabolism	1.52436	Thyroid hormone synthesis	0.726845	Signaling pathways regulating pluripotency of stem cells	1.05985	Arginine and proline metabolism	1.69252	Notch signaling pathway	3.15221	Drug metabolism	0.140847	NOD-like receptor signaling pathway	0.302563
Type II diabetes mellitus	0.999701	Arrhythmogenic right ventricular cardiomyopathy (ARVC)	1.20142	Phosphonate and phosphinate metabolism	1.39696	Endocrine and other factor-regulated calcium reabsorption	2.7032	Basal cell carcinoma	1.17792			One carbon pool by folate	1.49458	Nucleotide excision repair	0.688132	Glycerolipid metabolism	1.04989	Insulin resistance	1.6319	Primary bile acid biosynthesis	2.99313	Neurotrophin signaling pathway	0.118853	Fc epsilon RI signaling pathway	0.302352
Chronic myeloid leukemia	0.989186	Gap junction	1.161	Parathyroid hormone synthesis, secretion and action	1.35387	Vascular smooth muscle contraction	2.62535	Purine metabolism	1.17738			Vasopressin-regulated water reabsorption	1.462	ErbB signaling pathway	0.670937	Long-term depression	1.04989	Gastric acid secretion	1.63179	Complement and coagulation cascades	2.94185	Viral carcinogenesis	0.115344	RIG-I-like receptor signaling pathway	0.302352
Estrogen signaling pathway	0.963335	Inositol phosphate metabolism	1.14541	Starch and sucrose metabolism	1.21808	Dilated cardiomyopathy (DCM)	2.46812	Complement and coagulation cascades	1.13767			Neurotrophin signaling pathway	1.38546	Long-term potentiation	0.670307	Vascular smooth muscle contraction	1.00559	Dopaminergic synapse	1.60272	cAMP signaling pathway	2.89074	Sphingolipid signaling pathway	0.11067	Vascular smooth muscle contraction	0.286675
Synaptic vesicle cycle	0.953598	Oxytocin signaling pathway	1.14322	Hippo signaling pathway	1.20728	Glycosylphosphatidylinositol (GPI)-anchor biosynthesis	2.46547	Cholinergic synapse	1.12312			Biosynthesis of unsaturated fatty acids	1.33278	Caffeine metabolism	0.641424	Apoptosis	0.988266	Circadian entrainment	1.5654	Renin secretion	2.84845	Inflammatory mediator regulation of TRP channels	0.103132	Apoptosis	0.280385
Cholesterol metabolism	0.95025	T cell receptor signaling pathway	1.08989	TGF-beta signaling pathway	1.16863	Circadian entrainment	2.42367	Protein processing in endoplasmic reticulum	1.12197			beta-Alanine metabolism	1.33278	Phosphonate and phosphinate metabolism	0.641424	Basal cell carcinoma	0.984329	Viral myocarditis	1.55909	Cushing syndrome	2.65587	Autophagy	0.0961802	cAMP signaling pathway	0.272726
Other types of O-glycan biosynthesis	0.93799	Cytosolic DNA-sensing pathway	1.0725	Glutathione metabolism	1.03271	N-Glycan biosynthesis	2.23403	Ubiquitin mediated proteolysis	1.1197			Purine metabolism	1.30978	Adipocytokine signaling pathway	0.629756	Mitophagy	0.984329	cAMP signaling pathway	1.55547	Hippo signaling pathway	2.65587	Signaling pathways regulating pluripotency of stem cells	0.081951	Fluid shear stress and atherosclerosis	0.268264
Herpes simplex virus 1 infection	0.917577	Glycerolipid metabolism	1.0725	ErbB signaling pathway	1.01891	Glycolysis / Gluconeogenesis	2.19909	Pantothenate and CoA biosynthesis	1.09176			Non-alcoholic fatty liver disease (NAFLD)	1.24848	Morphine addiction	0.601954	Glutathione metabolism	0.953605	Fatty acid elongation	1.49794	Salivary secretion	2.63478	Apoptosis	0.0749058	B cell receptor signaling pathway	0.262458
Arginine and proline metabolism	0.903748	Cell adhesion molecules (CAMs)	1.07123	Estrogen signaling pathway	1.01733	Signaling pathways regulating pluripotency of stem cells	2.18413	Drug metabolism	1.09141			Sulfur metabolism	1.21585	Collecting duct acid secretion	0.57737	Graft-versus-host disease	0.953605	GABAergic synapse	1.37737	Morphine addiction	2.55887	Systemic lupus erythematosus	0.0716428	Neuroactive ligand-receptor interaction	0.259921
Signaling pathways regulating pluripotency of stem cells	0.893941	Complement and coagulation cascades	1.06615	DNA replication	1.01721	Lysine degradation	2.14597	Homologous recombination	1.08435			Arrhythmogenic right ventricular cardiomyopathy (ARVC)	1.20142	Estrogen signaling pathway	0.562439	Metabolism of xenobiotics by cytochrome P450	0.895904	Progesterone-mediated oocyte maturation	1.37737	Cytokine-cytokine receptor interaction	2.47236	Breast cancer	0.0655877	Inositol phosphate metabolism	0.253511
Phenylalanine metabolism	0.856671	Proximal tubule bicarbonate reclamation	1.0561	Metabolism of xenobiotics by cytochrome P450	0.916944	Intestinal immune network for IgA production	2.05206	Dilated cardiomyopathy (DCM)	1.06321			Circadian entrainment	1.17785	Cocaine addiction	0.555939	RIG-I-like receptor signaling pathway	0.842767	Autoimmune thyroid disease	1.35942	Rap1 signaling pathway	2.26866	Endocytosis	0.0610149	Bacterial invasion of epithelial cells	0.244932
Vascular smooth muscle contraction	0.82987	Sphingolipid metabolism	1.05506	Nitrogen metabolism	0.882639	Adrenergic signaling in cardiomyocytes	2.04831	GnRH signaling pathway	1.06321			Prion diseases	1.13141	Glutamatergic synapse	0.534281	Cortisol synthesis and secretion	0.817764	Cardiac muscle contraction	1.35942	Nucleotide excision repair	2.19935	mTOR signaling pathway	0.0563275	Gastric acid secretion	0.244932
Amyotrophic lateral sclerosis (ALS)	0.81875	Type II diabetes mellitus	1.05506	Calcium signaling pathway	0.882545	Synaptic vesicle cycle	2.04731	Steroid biosynthesis	0.980076			Ether lipid metabolism	1.12501	Progesterone-mediated oocyte maturation	0.526287	Oxytocin signaling pathway	0.792936	TGF-beta signaling pathway	1.32179	Vasopressin-regulated water reabsorption	2.19935	Cushing syndrome	0.0506097	Adrenergic signaling in cardiomyocytes	0.240444
Histidine metabolism	0.784461	Systemic lupus erythematosus	1.05313	Synaptic vesicle cycle	0.870286	Base excision repair	2.01904	Basal transcription factors	0.965355			cAMP signaling pathway	1.08546	Histidine metabolism	0.526177	mTOR signaling pathway	0.792936	Oocyte meiosis	1.32173	Phosphatidylinositol signaling system	2.08177	Wnt signaling pathway	0.0495456	Renin secretion	0.228809
Systemic lupus erythematosus	0.770667	Glucagon signaling pathway	1.04845	Ether lipid metabolism	0.854173	Fructose and mannose metabolism	2.01904	Vasopressin-regulated water reabsorption	0.965355			Proximal tubule bicarbonate reclamation	1.0561	Tight junction	0.487395	Adherens junction	0.748403	Axon guidance	1.30222	Riboflavin metabolism	2.0176	Protein processing in endoplasmic reticulum	0.0464997	Synaptic vesicle cycle	0.22123
Peroxisome	0.741835	Fructose and mannose metabolism	1.04416	Insulin signaling pathway	0.842868	Collecting duct acid secretion	2.00894	Hematopoietic cell lineage	0.930025			Type II diabetes mellitus	1.05506	Basal cell carcinoma	0.48479	Inositol phosphate metabolism	0.727013	Glycolysis / Gluconeogenesis	1.27799	Bile secretion	1.94957	RNA transport	0.0427569	Cardiac muscle contraction	0.213952
Thyroid hormone signaling pathway	0.725154	cGMP-PKG signaling pathway	1.01292	Gastric cancer	0.821076	Cushing syndrome	1.93178	Hedgehog signaling pathway	0.911855			Hepatocellular carcinoma	1.04168	Mitophagy	0.48479	Wnt signaling pathway	0.718649	Pentose phosphate pathway	1.15178	SNARE interactions in vesicular transport	1.80861	MAPK signaling pathway	0.0414187	mTOR signaling pathway	0.211212
Asthma	0.720076	GABAergic synapse	0.979281	Choline metabolism in cancer	0.804218	Serotonergic synapse	1.91311	Neurotrophin signaling pathway	0.894793			Cellular senescence	1.03807	Protein export	0.479106	Bacterial invasion of epithelial cells	0.706418	Breast cancer	1.1055	Serotonergic synapse	1.76222	Hepatocellular carcinoma	0.0393446	ErbB signaling pathway	0.175849
Endocrine and other factor-regulated calcium reabsorption	0.70857	GnRH signaling pathway	0.979281	Autophagy	0.801484	Pancreatic secretion	1.91269	Glycosphingolipid biosynthesis	0.861913			Autophagy	1.02713	Oocyte meiosis	0.451462	Gastric acid secretion	0.706418	Adrenergic signaling in cardiomyocytes	1.07162	Ether lipid metabolism	1.73097	Alzheimer disease	0.0362301	Human immunodeficiency virus 1 infection	0.172307
Breast cancer	0.6986	Renin-angiotensin system	0.964617	Non-alcoholic fatty liver disease (NAFLD)	0.791753	Glutamatergic synapse	1.90993	MicroRNAs in cancer	0.856875			Phenylalanine metabolism	0.946318	Signaling pathways regulating pluripotency of stem cells	0.446776	Herpes simplex virus 1 infection	0.676762	ErbB signaling pathway	1.03674	Estrogen signaling pathway	1.6643	Thermogenesis	0.0120977	PPAR signaling pathway	0.170316
Gap junction	0.69155	Synaptic vesicle cycle	0.947492	Pantothenate and CoA biosynthesis	0.761718	Neomycin, kanamycin and gentamicin biosynthesis	1.87294	Sphingolipid signaling pathway	0.822489			TGF-beta signaling pathway	0.938614	Biosynthesis of unsaturated fatty acids	0.441312	Renin secretion	0.667467	Calcium signaling pathway	1.02312	Sulfur metabolism	1.62412	Human immunodeficiency virus 1 infection	0.0106099	Insulin secretion	0.164988
Axon guidance	0.66544	Terpenoid backbone biosynthesis	0.946318	GABAergic synapse	0.754148	Renin-angiotensin system	1.85843	Adherens junction	0.810238			Autoimmune thyroid disease	0.903861	Phospholipase D signaling pathway	0.396453	Neuroactive ligand-receptor interaction	0.644428	Gastric cancer	1.00685	Axon guidance	1.61829	Olfactory transduction	3.07931e-06	Taste transduction	0.154912
Phospholipase D signaling pathway	0.665267	Calcium signaling pathway	0.932715	Progesterone-mediated oocyte maturation	0.754148	Complement and coagulation cascades	1.84736	AMPK signaling pathway	0.777761			Cardiac muscle contraction	0.903861	Nicotine addiction	0.383237	Salivary secretion	0.631271	PPAR signaling pathway	0.991221	Synaptic vesicle cycle	1.578			Arachidonic acid metabolism	0.150148
Folate biosynthesis	0.662451	Cardiac muscle contraction	0.903861	Fatty acid elongation	0.692301	Oocyte meiosis	1.77201	ABC transporters	0.730697			Alanine, aspartate and glutamate metabolism	0.89197	Dilated cardiomyopathy (DCM)	0.373444	Salmonella infection	0.631271	Choline metabolism in cancer	0.952034	DNA replication	1.55802			GnRH signaling pathway	0.145555
Steroid hormone biosynthesis	0.623157	Amyotrophic lateral sclerosis (ALS)	0.819752	Ferroptosis	0.657493	Phosphatidylinositol signaling system	1.76524	Type II diabetes mellitus	0.730697			Parathyroid hormone synthesis, secretion and action	0.863944	Taurine and hypotaurine metabolism	0.367448	Necroptosis	0.557602	Insulin secretion	0.947753	Fructose and mannose metabolism	1.55802			Progesterone-mediated oocyte maturation	0.145555
VEGF signaling pathway	0.615621	mTOR signaling pathway	0.745585	Drug metabolism	0.652774	Dopaminergic synapse	1.72705	Other types of O-glycan biosynthesis	0.72454			Metabolism of xenobiotics by cytochrome P450	0.820018	Systemic lupus erythematosus	0.366644	RNA degradation	0.551288	Inositol phosphate metabolism	0.94517	Mismatch repair	1.50555			Retinol metabolism	0.141127
Ascorbate and aldarate metabolism	0.610696	Ferroptosis	0.708816	Purine metabolism	0.630343	mTOR signaling pathway	1.6969	Aldosterone synthesis and secretion	0.715463			Ubiquinone and other terpenoid-quinone biosynthesis	0.811756	Calcium signaling pathway	0.354417	Tuberculosis	0.540622	Thyroid hormone synthesis	0.94517	Ubiquitin mediated proteolysis	1.48467			Morphine addiction	0.136856
Butanoate metabolism	0.610696	Inflammatory mediator regulation of TRP channels	0.698748	Porphyrin and chlorophyll metabolism	0.603712	Arrhythmogenic right ventricular cardiomyopathy (ARVC)	1.69586	Glucagon signaling pathway	0.715463			Cell cycle	0.806521	Endocrine and other factor-regulated calcium reabsorption	0.349246	Insulin secretion	0.509505	Other types of O-glycan biosynthesis	0.9231	Oxytocin signaling pathway	1.45102			Alzheimer disease	0.135891
GABAergic synapse	0.602071	Homologous recombination	0.657534	Mitophagy	0.579823	Bile secretion	1.69586	Cholesterol metabolism	0.692375			mTOR signaling pathway	0.745585	Pancreatic secretion	0.343514	Viral myocarditis	0.496484	Proximal tubule bicarbonate reclamation	0.9231	Primary immunodeficiency	1.44841			Chemical carcinogenesis	0.12876
Retinol metabolism	0.581778	Regulation of lipolysis in adipocytes	0.640705	Vasopressin-regulated water reabsorption	0.509774	GABAergic synapse	1.68956	Notch signaling pathway	0.692375			AMPK signaling pathway	0.724285	Sphingolipid metabolism	0.339684	MicroRNAs in cancer	0.488826	Fructose and mannose metabolism	0.895456	Insulin signaling pathway	1.4429			mRNA surveillance pathway	0.121218
Protein export	0.564063	Cushing syndrome	0.636312	Biosynthesis of unsaturated fatty acids	0.507523	Progesterone-mediated oocyte maturation	1.68956	Mannose type O-glycan biosynthesis	0.65917			Folate biosynthesis	0.690713	Type II diabetes mellitus	0.339684	Complement and coagulation cascades	0.483884	Long-term depression	0.893576	Phenylalanine metabolism	1.35866			Glycerophospholipid metabolism	0.117641
Morphine addiction	0.562244	Viral myocarditis	0.593493	Circadian entrainment	0.478579	Aldosterone-regulated sodium reabsorption	1.57843	Terpenoid backbone biosynthesis	0.65917			Endocrine and other factor-regulated calcium reabsorption	0.681091	Metabolism of xenobiotics by cytochrome P450	0.338463	Arachidonic acid metabolism	0.471688	Oxytocin signaling pathway	0.8884	Wnt signaling pathway	1.23631			Phosphatidylinositol signaling system	0.114186
Neuroactive ligand-receptor interaction	0.550892	Huntington disease	0.573336	Serotonergic synapse	0.475491	Ether lipid metabolism	1.5455	Arginine and proline metabolism	0.656421			Phototransduction	0.62448	Porphyrin and chlorophyll metabolism	0.327067	Antigen processing and presentation	0.459882	mTOR signaling pathway	0.8884	RIG-I-like receptor signaling pathway	1.22403			Melanogenesis	0.107622
Calcium signaling pathway	0.547915	Mucin type O-glycan biosynthesis	0.565614	Endocrine and other factor-regulated calcium reabsorption	0.474195	Morphine addiction	1.54525	Cysteine and methionine metabolism	0.656421			Alzheimer disease	0.611717	Staphylococcus aureus infection	0.322321	GnRH signaling pathway	0.459882	Notch signaling pathway	0.833839	Drug metabolism	1.21428			Endocytosis	0.102889
Platelet activation	0.546497	RNA polymerase	0.565614	Other types of O-glycan biosynthesis	0.438418	Cocaine addiction	1.4413	Estrogen signaling pathway	0.622989			Serotonergic synapse	0.583699	Complement and coagulation cascades	0.318013	Protein digestion and absorption	0.459882	Phenylalanine metabolism	0.824754	Glutamatergic synapse	1.21428			Longevity regulating pathway	0.10149
Allograft rejection	0.490696	Adrenergic signaling in cardiomyocytes	0.561577	Dilated cardiomyopathy (DCM)	0.429289	Type II diabetes mellitus	1.4413	Fanconi anemia pathway	0.622659			VEGF signaling pathway	0.567461	Circadian entrainment	0.30847	Calcium signaling pathway	0.457328	Autophagy	0.807343	Glycosylphosphatidylinositol (GPI)-anchor biosynthesis	1.11484			Th17 cell differentiation	0.10149
Basal cell carcinoma	0.490696	Protein processing in endoplasmic reticulum	0.560075	GnRH signaling pathway	0.429289	Calcium signaling pathway	1.38536	Histidine metabolism	0.601282			Basal transcription factors	0.566961	Terpenoid backbone biosynthesis	0.301516	Retinol metabolism	0.448447	Basal cell carcinoma	0.798376	Ferroptosis	1.09194			Pancreatic secretion	0.0930323
Circadian rhythm	0.483727	Mineral absorption	0.52695	Dopaminergic synapse	0.417667	Non-alcoholic fatty liver disease (NAFLD)	1.38031	Insulin resistance	0.55363			Gastric acid secretion	0.538433	Aldosterone-regulated sodium reabsorption	0.293406	TGF-beta signaling pathway	0.448447	Mitophagy	0.798376	Longevity regulating pathway	1.07232			Alcoholism	0.0836377
Autophagy	0.47544	Pancreatic secretion	0.519853	Pentose and glucuronate interconversions	0.414892	Caffeine metabolism	1.32858	Asthma	0.549809			Herpes simplex virus 1 infection	0.532209	Base excision repair	0.259129	Cytokine-cytokine receptor interaction	0.431236	Dilated cardiomyopathy (DCM)	0.792499	Adipocytokine signaling pathway	1.06369			Cholinergic synapse	0.0741516
Glutathione metabolism	0.46941	Progesterone-mediated oocyte maturation	0.51636	Taurine and hypotaurine metabolism	0.387655	Phosphonate and phosphinate metabolism	1.32858	Glycosylphosphatidylinositol (GPI)-anchor biosynthesis	0.549809			Hedgehog signaling pathway	0.52695	Fructose and mannose metabolism	0.259129	Glycerophospholipid metabolism	0.386887	Serotonergic synapse	0.752149	Regulation of lipolysis in adipocytes	1.03997			Drug metabolism	0.0721142
Phosphatidylinositol signaling system	0.45926	Glycosphingolipid biosynthesis	0.490038	Ubiquinone and other terpenoid-quinone biosynthesis	0.387655	Arginine and proline metabolism	1.25484	alpha-Linolenic acid metabolism	0.549809			Gastric cancer	0.524739	Primary bile acid biosynthesis	0.25739	Phosphatidylinositol signaling system	0.377685	Ubiquinone and other terpenoid-quinone biosynthesis	0.723305	Porphyrin and chlorophyll metabolism	1.01957			Neurotrophin signaling pathway	0.0595007
Choline metabolism in cancer	0.44421	Long-term depression	0.473887	Phenylalanine metabolism	0.384696	Porphyrin and chlorophyll metabolism	1.24205	Insulin signaling pathway	0.542973			Pancreatic secretion	0.519853	Glycerolipid metabolism	0.254218	T cell receptor signaling pathway	0.351673	Estrogen signaling pathway	0.700624	MicroRNAs in cancer	1.00682			Serotonergic synapse	0.0443719
Metabolism of xenobiotics by cytochrome P450	0.429963	Insulin signaling pathway	0.453034	Renin-angiotensin system	0.340378	beta-Alanine metabolism	1.2376	Hypertrophic cardiomyopathy (HCM)	0.468875			Progesterone-mediated oocyte maturation	0.51636	Arginine and proline metabolism	0.253181	Th17 cell differentiation	0.343502	Long-term potentiation	0.638736	Inositol phosphate metabolism	0.969513			Ras signaling pathway	0.0430364
beta-Alanine metabolism	0.41742	Pentose phosphate pathway	0.386551	Arrhythmogenic right ventricular cardiomyopathy (ARVC)	0.323253	Ubiquitin mediated proteolysis	1.11247	Insulin secretion	0.468875			Fatty acid biosynthesis	0.481279	Pentose phosphate pathway	0.22431	Cholinergic synapse	0.267433	Non-alcoholic fatty liver disease (NAFLD)	0.628467	Thyroid hormone synthesis	0.969513			Estrogen signaling pathway	0.04211
Dopaminergic synapse	0.414109	Amino sugar and nucleotide sugar metabolism	0.368327	Alanine, aspartate and glutamate metabolism	0.308658	Carbohydrate digestion and absorption	1.06175	Ascorbate and aldarate metabolism	0.462718			Glycerolipid metabolism	0.473887	Ferroptosis	0.20852	Glutamatergic synapse	0.261598	Alcoholism	0.524402	Pancreatic secretion	0.961187			Oxidative phosphorylation	0.04211
Aldosterone synthesis and secretion	0.402206	Autophagy	0.35349	Glycerolipid metabolism	0.30729	Pentose and glucuronate interconversions	1.02825	Phototransduction	0.462718			Oxytocin signaling pathway	0.45788	cGMP-PKG signaling pathway	0.197365	Oocyte meiosis	0.250386	Glutamatergic synapse	0.515231	mTOR signaling pathway	0.940188			Dopaminergic synapse	0.0410271
Starch and sucrose metabolism	0.388568	Starch and sucrose metabolism	0.352626	Inositol phosphate metabolism	0.302938	Wnt signaling pathway	1.02042	Oocyte meiosis	0.458156			Salivary secretion	0.437512	Breast cancer	0.194403	Natural killer cell mediated cytotoxicity	0.239753	Hypertrophic cardiomyopathy (HCM)	0.497728	Pyrimidine metabolism	0.932602			Ubiquitin mediated proteolysis	0.0379587
Pancreatic secretion	0.364493	RNA degradation	0.338083	Thyroid hormone synthesis	0.302938	Asthma	0.994084	Ovarian steroidogenesis	0.45806			Basal cell carcinoma	0.420703	ABC transporters	0.194058	Lysosome	0.210979	Mucin type O-glycan biosynthesis	0.485728	Collecting duct acid secretion	0.922768			Oxytocin signaling pathway	0.0253184
Pentose and glucuronate interconversions	0.362175	Glycolysis / Gluconeogenesis	0.33229	Glycosylphosphatidylinositol (GPI)-anchor biosynthesis	0.298244	Aldosterone synthesis and secretion	0.987386	VEGF signaling pathway	0.43585			Mitophagy	0.420703	Glycosylphosphatidylinositol (GPI)-anchor biosynthesis	0.192665	Dopaminergic synapse	0.168269	Glucagon signaling pathway	0.464249	cGMP-PKG signaling pathway	0.89616			Ribosome	0.0171188
Parathyroid hormone synthesis, secretion and action	0.34149	Long-term potentiation	0.33229	Arginine and proline metabolism	0.285496	Inositol phosphate metabolism	0.976174	Mucin type O-glycan biosynthesis	0.425745			ABC transporters	0.395306	Melanogenesis	0.190961	Ubiquitin mediated proteolysis	0.158464	Longevity regulating pathway	0.464249	Basal transcription factors	0.890826			Huntington disease	0.0101691
Gastric acid secretion	0.305952	Oocyte meiosis	0.326662	Aldosterone-regulated sodium reabsorption	0.280087	Folate biosynthesis	0.888063	Protein export	0.425745			Cocaine addiction	0.395306	Vascular smooth muscle contraction	0.190569	Insulin signaling pathway	0.155347	Wnt signaling pathway	0.463226	TGF-beta signaling pathway	0.888212			Herpes simplex virus 1 infection	0.0071387
Renin secretion	0.281668	Amphetamine addiction	0.31338	MicroRNAs in cancer	0.271147	Staphylococcus aureus infection	0.864758	Phospholipase D signaling pathway	0.413316			Glutamatergic synapse	0.355538	Non-homologous end-joining	0.189766	Adrenergic signaling in cardiomyocytes	0.130311	Fatty acid biosynthesis	0.424266	Glycerolipid metabolism	0.793776			Olfactory transduction	4.19468e-06
Cholinergic synapse	0.281381	Selenocompound metabolism	0.304694	Renin secretion	0.249283	Regulation of lipolysis in adipocytes	0.833622	Antigen processing and presentation	0.403358			Starch and sucrose metabolism	0.352626	Fatty acid elongation	0.189094	RNA transport	0.091359	Renin secretion	0.389624	Glycosphingolipid biosynthesis	0.780365
Autoimmune thyroid disease	0.259528	Aldosterone synthesis and secretion	0.296323	Ascorbate and aldarate metabolism	0.233036	Selenocompound metabolism	0.826337	Fatty acid elongation	0.392425			Breast cancer	0.338142	Adrenergic signaling in cardiomyocytes	0.17783	Phagosome	0.0723953	Signaling pathways regulating pluripotency of stem cells	0.368805	Adrenergic signaling in cardiomyocytes	0.687491
Oocyte meiosis	0.255672	Cortisol synthesis and secretion	0.295585	Phototransduction	0.233036	Renin secretion	0.826025	Glycerolipid metabolism	0.376301			RNA degradation	0.338083	Hypertrophic cardiomyopathy (HCM)	0.176379	Alcoholism	0.0521602	Ubiquitin mediated proteolysis	0.35478	Fatty acid biosynthesis	0.672321
mTOR signaling pathway	0.246991	DNA replication	0.294427	Fatty acid biosynthesis	0.213098	Ascorbate and aldarate metabolism	0.794772	Long-term depression	0.376301			Adrenergic signaling in cardiomyocytes	0.32592	Sulfur metabolism	0.174321			Herpes simplex virus 1 infection	0.33611	Circadian entrainment	0.644187
Glycine, serine and threonine metabolism	0.243039	Alcoholism	0.291057	Mucin type O-glycan biosynthesis	0.206508	Riboflavin metabolism	0.743496	Chemical carcinogenesis	0.347692			ErbB signaling pathway	0.321142	GABAergic synapse	0.170171			ABC transporters	0.327134	Type II diabetes mellitus	0.642561
Tyrosine metabolism	0.243039	Dopaminergic synapse	0.290344	Alzheimer disease	0.200454	ABC transporters	0.722958	Inflammatory mediator regulation of TRP channels	0.325492			RIG-I-like receptor signaling pathway	0.31338	Chemical carcinogenesis	0.164279			Cocaine addiction	0.327134	Metabolism of xenobiotics by cytochrome P450	0.609906
Homologous recombination	0.228166	Th1 and Th2 cell differentiation	0.275303	Oocyte meiosis	0.19827	Mucin type O-glycan biosynthesis	0.712441	Cushing syndrome	0.315226			Nitrogen metabolism	0.304694	Amphetamine addiction	0.163285			AMPK signaling pathway	0.313791	Dopaminergic synapse	0.604176
Neurotrophin signaling pathway	0.218217	Primary immunodeficiency	0.269445	cAMP signaling pathway	0.192575	Cortisol synthesis and secretion	0.690687	Phosphatidylinositol signaling system	0.300238			Selenocompound metabolism	0.304694	Phosphatidylinositol signaling system	0.158678			Inflammatory mediator regulation of TRP channels	0.300987	Peroxisome	0.588036
Cell cycle	0.204902	Other glycan degradation	0.264404	Oxytocin signaling pathway	0.178597	Cholesterol metabolism	0.670178	Autophagy	0.296787			Estrogen signaling pathway	0.302031	Other types of O-glycan biosynthesis	0.152156			Fatty acid degradation	0.282469	Glucagon signaling pathway	0.571515
ErbB signaling pathway	0.203929	Steroid biosynthesis	0.230431	mTOR signaling pathway	0.178597	Fatty acid elongation	0.639588	Choline metabolism in cancer	0.289495			Glucagon signaling pathway	0.296323	Proximal tubule bicarbonate reclamation	0.152156			Phosphatidylinositol signaling system	0.27672	PPAR signaling pathway	0.562266
Basal transcription factors	0.201584	Pyrimidine metabolism	0.198091	Regulation of lipolysis in adipocytes	0.175343	Glucagon signaling pathway	0.616633	SNARE interactions in vesicular transport	0.287704			Longevity regulating pathway	0.296323	Pantothenate and CoA biosynthesis	0.147485			Pentose and glucuronate interconversions	0.27151	Starch and sucrose metabolism	0.544772
PPAR signaling pathway	0.196014	Renin secretion	0.196907	Nucleotide excision repair	0.173803	Herpes simplex virus 1 infection	0.615793	Starch and sucrose metabolism	0.287704			Insulin secretion	0.289797	Inositol phosphate metabolism	0.138245			Nitrogen metabolism	0.26574	Insulin secretion	0.537669
Hedgehog signaling pathway	0.189694	Glycine, serine and threonine metabolism	0.190639	Chemical carcinogenesis	0.173461	One carbon pool by folate	0.615572	Cortisol synthesis and secretion	0.257882			Th1 and Th2 cell differentiation	0.275303	Basal transcription factors	0.123097			Ribosome biogenesis in eukaryotes	0.259391	Fanconi anemia pathway	0.531446
AMPK signaling pathway	0.186513	mRNA surveillance pathway	0.173579	Hedgehog signaling pathway	0.158202	Steroid biosynthesis	0.615572	RNA transport	0.254004			Nicotinate and nicotinamide metabolism	0.269445	Ether lipid metabolism	0.121505			Melanogenesis	0.25089	Pentose and glucuronate interconversions	0.501315
Progesterone-mediated oocyte maturation	0.161184	Glutamatergic synapse	0.169679	Glyoxylate and dicarboxylate metabolism	0.144915	Alzheimer disease	0.606635	Adipocytokine signaling pathway	0.235267			Primary immunodeficiency	0.269445	Mannose type O-glycan biosynthesis	0.118673			Glycosaminoglycan biosynthesis	0.227252	Amyotrophic lateral sclerosis (ALS)	0.499288
Hepatocellular carcinoma	0.15662	Serotonergic synapse	0.164783	Breast cancer	0.140488	Glycerolipid metabolism	0.595825	Nicotinate and nicotinamide metabolism	0.231114			Renin-angiotensin system	0.269445	Wnt signaling pathway	0.115688			Retrograde endocannabinoid signaling	0.221582	GABAergic synapse	0.449907
Oxidative phosphorylation	0.145444	Spliceosome	0.164783	Bile secretion	0.139297	Sulfur metabolism	0.576714	Renin secretion	0.187767			MicroRNAs in cancer	0.267969	Lysine degradation	0.115171			Purine metabolism	0.206255	AMPK signaling pathway	0.449225
Amino sugar and nucleotide sugar metabolism	0.141396	Mismatch repair	0.155868	cGMP-PKG signaling pathway	0.135765	Glutathione metabolism	0.487663	Glycine, serine and threonine metabolism	0.175155			Arachidonic acid metabolism	0.24847	Ubiquitin mediated proteolysis	0.11477			Arginine biosynthesis	0.199535	Arrhythmogenic right ventricular cardiomyopathy (ARVC)	0.447553
Chemical carcinogenesis	0.138175	Circadian entrainment	0.148828	Proteasome	0.131219	Graft-versus-host disease	0.487663	Cardiac muscle contraction	0.171815			Insulin signaling pathway	0.247802	Steroid biosynthesis	0.111747			Steroid biosynthesis	0.199535	Nitrogen metabolism	0.437099
N-Glycan biosynthesis	0.133568	Mitophagy	0.141647	Citrate cycle (TCA cycle)	0.129088	Retrograde endocannabinoid signaling	0.474578	Adrenergic signaling in cardiomyocytes	0.171494			Inositol phosphate metabolism	0.234221	Insulin signaling pathway	0.10377			Arrhythmogenic right ventricular cardiomyopathy (ARVC)	0.196464	Selenocompound metabolism	0.437099
mRNA surveillance pathway	0.128028	Mannose type O-glycan biosynthesis	0.137661	beta-Alanine metabolism	0.129088	Pentose phosphate pathway	0.466323	Glutamatergic synapse	0.169245			Steroid biosynthesis	0.230431	Nicotinate and nicotinamide metabolism	0.102151			Ribosome	0.187637	Alanine, aspartate and glutamate metabolism	0.393162
Fanconi anemia pathway	0.126244	Glutathione metabolism	0.132533	Gastric acid secretion	0.120592	Glycerophospholipid metabolism	0.466177	Ribosome biogenesis in eukaryotes	0.163383			Regulation of lipolysis in adipocytes	0.226887	Oxytocin signaling pathway	0.101693			Regulation of lipolysis in adipocytes	0.183326	Non-alcoholic fatty liver disease (NAFLD)	0.353864
Circadian entrainment	0.114286	Histidine metabolism	0.121897	Long-term depression	0.117174	Nucleotide excision repair	0.46407	Nucleotide excision repair	0.143596			Aldosterone-regulated sodium reabsorption	0.226275	Galactose metabolism	0.100474			cGMP-PKG signaling pathway	0.17389	Calcium signaling pathway	0.339428
Melanogenesis	0.110065	Vascular smooth muscle contraction	0.116351	Glutamatergic synapse	0.111761	Viral myocarditis	0.447056	mTOR signaling pathway	0.143038			Huntington disease	0.215769	Glutathione metabolism	0.0970825			Ovarian steroidogenesis	0.170748	Arginine biosynthesis	0.33648
Regulation of lipolysis in adipocytes	0.0959373	Necroptosis	0.112986	ABC transporters	0.108974	SNARE interactions in vesicular transport	0.420634	Calcium signaling pathway	0.140354			Chemical carcinogenesis	0.192314	Bile secretion	0.0935675			Tyrosine metabolism	0.157665	One carbon pool by folate	0.33648
Gastric cancer	0.0890564	Asthma	0.108195	Tryptophan metabolism	0.108974	Proximal tubule bicarbonate reclamation	0.406416	Peroxisome	0.132197			Tyrosine metabolism	0.190639	Drug metabolism	0.0919623			Alzheimer disease	0.155028	Steroid biosynthesis	0.33648
Lysine degradation	0.0818031	Glycosylphosphatidylinositol (GPI)-anchor biosynthesis	0.108195	Glucagon signaling pathway	0.10641	Amphetamine addiction	0.373569	Huntington disease	0.129428			Lysine degradation	0.185161	Ovarian steroidogenesis	0.0851696			Cushing syndrome	0.15451	Oocyte meiosis	0.327674
Mitophagy	0.0664976	Ether lipid metabolism	0.106805	Arachidonic acid metabolism	0.106245	Phenylalanine metabolism	0.355889	Wnt signaling pathway	0.119347			Phospholipase D signaling pathway	0.166	Gastric cancer	0.0721444			Glycerophospholipid metabolism	0.1247	Lysine degradation	0.325808
Glutamatergic synapse	0.0656178	Folate biosynthesis	0.0962424	Notch signaling pathway	0.0993475	Inflammatory mediator regulation of TRP channels	0.311376	Viral myocarditis	0.116203			Other types of O-glycan biosynthesis	0.155868	Proteasome	0.0712848			Vasopressin-regulated water reabsorption	0.121361	Tyrosine metabolism	0.310902
RIG-I-like receptor signaling pathway	0.0517136	Cholesterol metabolism	0.0909334	Cardiac muscle contraction	0.0903018	Cysteine and methionine metabolism	0.256569	Arachidonic acid metabolism	0.106705			Oocyte meiosis	0.154536	mTOR signaling pathway	0.0702491			Terpenoid backbone biosynthesis	0.117491	Signaling pathways regulating pluripotency of stem cells	0.301321
Alzheimer disease	0.0418362	Phototransduction	0.0857826	Salivary secretion	0.0903018	Allograft rejection	0.23638	Cocaine addiction	0.10462			Choline metabolism in cancer	0.148828	Serotonergic synapse	0.0662063			Glutathione metabolism	0.10441	Melanogenesis	0.289181
Inflammatory mediator regulation of TRP channels	0.0411105	Arginine and proline metabolism	0.0839587	One carbon pool by folate	0.0898535	RNA transport	0.233792	GABAergic synapse	0.102271			Terpenoid backbone biosynthesis	0.137661	Purine metabolism	0.0645983			RNA degradation	0.100713	Homologous recombination	0.287959
Serotonergic synapse	0.0344284	Cysteine and methionine metabolism	0.0839587	Pancreatic secretion	0.0883764	Phototransduction	0.213795	Morphine addiction	0.0939841			Calcium signaling pathway	0.132901	Aldosterone synthesis and secretion	0.0624258			alpha-Linolenic acid metabolism	0.09167	Aldosterone synthesis and secretion	0.264812
Spliceosome	0.0344284	RNA transport	0.079162	Long-term potentiation	0.0723163	Fatty acid biosynthesis	0.198849	Fatty acid degradation	0.0925736			Signaling pathways regulating pluripotency of stem cells	0.132642	Glycolysis / Gluconeogenesis	0.0611734			Metabolism of xenobiotics by cytochrome P450	0.0908525	Basal cell carcinoma	0.256929
Cellular senescence	0.0309828	Fanconi anemia pathway	0.0775494	Pyruvate metabolism	0.0657476	Cardiac muscle contraction	0.191578	Serotonergic synapse	0.090382			cGMP-PKG signaling pathway	0.131942	Fanconi anemia pathway	0.0602237			Vascular smooth muscle contraction	0.0822908	Mitophagy	0.256929
Ubiquitin mediated proteolysis	0.0278683	Protein export	0.0766014	RNA degradation	0.0627702	Homologous recombination	0.189626	Oxidative phosphorylation	0.0843598			Peroxisome	0.124285	AMPK signaling pathway	0.0551842			Folate biosynthesis	0.0812442	Alcoholism	0.251399
Alcoholism	0.0203608	Herpes simplex virus 1 infection	0.0640736	Glycerophospholipid metabolism	0.0622329	RNA polymerase	0.189053	Dopaminergic synapse	0.0815043			Cushing syndrome	0.110378	Nitrogen metabolism	0.0529955			Huntington disease	0.0795795	Glutathione metabolism	0.24226
Arachidonic acid metabolism	0.0192357	Purine metabolism	0.0598742	Ubiquitin mediated proteolysis	0.0594343	Insulin signaling pathway	0.173805	Glycerophospholipid metabolism	0.0762386			Glycosylphosphatidylinositol (GPI)-anchor biosynthesis	0.108195	Arrhythmogenic right ventricular cardiomyopathy (ARVC)	0.0521868			Type II diabetes mellitus	0.079329	Other types of O-glycan biosynthesis	0.233768
Retrograde endocannabinoid signaling	0.0183328	Ovarian steroidogenesis	0.0485001	Mismatch repair	0.0562518	Type I diabetes mellitus	0.151778	Alzheimer disease	0.0759434			Amphetamine addiction	0.10173	Peroxisome	0.0512739			Amphetamine addiction	0.0790944	Inflammatory mediator regulation of TRP channels	0.211548
Oxytocin signaling pathway	0.0159599	Pentose and glucuronate interconversions	0.0401039	AMPK signaling pathway	0.0551805	Ovarian steroidogenesis	0.143344	Circadian entrainment	0.0701683			Steroid hormone biosynthesis	0.0933111	Regulation of lipolysis in adipocytes	0.0511571			Ascorbate and aldarate metabolism	0.0721479	Terpenoid backbone biosynthesis	0.208319
Cushing syndrome	0.0134288	Nicotinate and nicotinamide metabolism	0.0326445	PPAR signaling pathway	0.0542299	Primary bile acid biosynthesis	0.137923	Vascular smooth muscle contraction	0.068639			Fatty acid degradation	0.0839587	Glyoxylate and dicarboxylate metabolism	0.0484929			Phototransduction	0.0721479	Glycolysis / Gluconeogenesis	0.203339
Wnt signaling pathway	0.0129739	Alanine, aspartate and glutamate metabolism	0.0294973	Glycine, serine and threonine metabolism	0.0528101	RNA degradation	0.136805	Valine, leucine and isoleucine degradation	0.0649309			Retinol metabolism	0.0832073	Ascorbate and aldarate metabolism	0.0433424			Arachidonic acid metabolism	0.0700176	Proteasome	0.198254
RNA transport	0.000762565	Graft-versus-host disease	0.0283888	Tyrosine metabolism	0.0528101	Pyrimidine metabolism	0.131961	Systemic lupus erythematosus	0.061933			RNA transport	0.079162	Renin-angiotensin system	0.042026			Protein export	0.064188	Retrograde endocannabinoid signaling	0.187071
Huntington disease	0.000289995	Thermogenesis	0.0262775	Valine, leucine and isoleucine degradation	0.0522802	Huntington disease	0.130425	Lysine degradation	0.0547057			Mucin type O-glycan biosynthesis	0.0766014	Cushing syndrome	0.0414332			Drug metabolism	0.0491489	Huntington disease	0.171137
Thermogenesis	6.64469e-05	Arachidonic acid metabolism	0.0259485	Inflammatory mediator regulation of TRP channels	0.0519688	Biosynthesis of unsaturated fatty acids	0.117147	Retrograde endocannabinoid signaling	0.0487545			Retrograde endocannabinoid signaling	0.0747962	Insulin secretion	0.038308			Oxidative phosphorylation	0.0458175	alpha-Linolenic acid metabolism	0.166702
Olfactory transduction	1.37699e-07	Steroid hormone biosynthesis	0.0259485	Mannose type O-glycan biosynthesis	0.048405	Nitrogen metabolism	0.11584	Allograft rejection	0.0437612			Oxidative phosphorylation	0.0659123	Citrate cycle (TCA cycle)	0.0382762			Glyoxylate and dicarboxylate metabolism	0.0456421	Alzheimer disease	0.155789
		Aminoacyl-tRNA biosynthesis	0.0244049	Terpenoid backbone biosynthesis	0.048405	Purine metabolism	0.109692	Mitophagy	0.0437612			mRNA surveillance pathway	0.0624709	Phenylalanine metabolism	0.0366881			beta-Alanine metabolism	0.0408552	Folate biosynthesis	0.149633
		Alzheimer disease	0.0238647	Longevity regulating pathway	0.044333	Pantothenate and CoA biosynthesis	0.0977548	Graft-versus-host disease	0.0414213			Circadian rhythm	0.0613893	mRNA surveillance pathway	0.0284962			Starch and sucrose metabolism	0.036617	Chemical carcinogenesis	0.149041
		Porphyrin and chlorophyll metabolism	0.0198382	Steroid hormone biosynthesis	0.0404167	Drug metabolism	0.0939836	Long-term potentiation	0.0351914			Renin secretion	0.0602645	Sulfur relay system	0.0269285			Insulin signaling pathway	0.0354042	Arginine and proline metabolism	0.148551
		Type I diabetes mellitus	0.019476	Lysine degradation	0.0397807	Arginine biosynthesis	0.0828397	Amphetamine addiction	0.03335			Glycerophospholipid metabolism	0.0589877	Fatty acid biosynthesis	0.0258452			Pyrimidine metabolism	0.0348954	Fatty acid degradation	0.148551
		Parkinson disease	0.0140392	Basal transcription factors	0.0381705	Primary immunodeficiency	0.0738039	Type I diabetes mellitus	0.0316137			Phosphatidylinositol signaling system	0.0556975	Glycerophospholipid metabolism	0.0246229			Aldosterone synthesis and secretion	0.0317681	Ascorbate and aldarate metabolism	0.134586
		Proteasome	0.0122835	Signaling pathways regulating pluripotency of stem cells	0.0282437	Spliceosome	0.0686054	Tight junction	0.0273328			Ubiquitin mediated proteolysis	0.0543722	Carbohydrate digestion and absorption	0.0237299			Glycerolipid metabolism	0.0274207	Maturity onset diabetes of the young	0.134586
		ABC transporters	0.0101832	RNA polymerase	0.0236102	Metabolism of xenobiotics by cytochrome P450	0.0681392	Arrhythmogenic right ventricular cardiomyopathy (ARVC)	0.0269713			Valine, leucine and isoleucine degradation	0.0524067	Pentose and glucuronate interconversions	0.023697			Nicotinate and nicotinamide metabolism	0.0265434	Phototransduction	0.134586
		Retrograde endocannabinoid signaling	0.0101395	Vascular smooth muscle contraction	0.0234371	Other types of O-glycan biosynthesis	0.0514792	Cell adhesion molecules (CAMs)	0.0246837			DNA replication	0.0361634	Cortisol synthesis and secretion	0.0223591			Alanine, aspartate and glutamate metabolism	0.0238929	Vascular smooth muscle contraction	0.125597
		Oxidative phosphorylation	0.00685939	Cocaine addiction	0.0224081	Peroxisome	0.0496159	Autoimmune thyroid disease	0.0197579			Long-term depression	0.0356665	Glucagon signaling pathway	0.0213201			Taste transduction	0.0200651	Mucin type O-glycan biosynthesis	0.12128
		Valine, leucine and isoleucine degradation	0.00490231	Phosphatidylinositol signaling system	0.0206923	Tyrosine metabolism	0.0470528	Spliceosome	0.0186135			Inflammatory mediator regulation of TRP channels	0.0347818	Circadian rhythm	0.0200069			Steroid hormone biosynthesis	0.0187402	RNA polymerase	0.12128
		Taste transduction	0.00477636	Peroxisome	0.0182577	AMPK signaling pathway	0.0452182	PPAR signaling pathway	0.0138697			PPAR signaling pathway	0.0336093	Thiamine metabolism	0.0179342			Glycine, serine and threonine metabolism	0.0175195	Glycosaminoglycan biosynthesis	0.1202
		Retinol metabolism	0.00383517	Fatty acid degradation	0.01815	Terpenoid backbone biosynthesis	0.0441881	Parkinson disease	0.0116361			Pyruvate metabolism	0.0266784	Glycine, serine and threonine metabolism	0.0169666			Proteasome	0.00960882	Fatty acid elongation	0.10948
		Allograft rejection	0.00263713	Ribosome biogenesis in eukaryotes	0.0180056	Arachidonic acid metabolism	0.0339777	Steroid hormone biosynthesis	0.0113739			Aminoacyl-tRNA biosynthesis	0.0244049	Vitamin B6 metabolism	0.0167291			Ether lipid metabolism	0.00871225	Cardiac muscle contraction	0.108297
		Autoimmune thyroid disease	0.000728877	Circadian rhythm	0.0179368	Basal transcription factors	0.0337666	Retinol metabolism	0.0103094			GnRH signaling pathway	0.0243244	Folate biosynthesis	0.0157429			Peroxisome	0.00451265	Circadian rhythm	0.0989891
		Peroxisome	0.000441085	Cushing syndrome	0.0173458	Autoimmune thyroid disease	0.0251644	Melanogenesis	0.00666968			Long-term potentiation	0.0226335	Propanoate metabolism	0.0154047			Valine, leucine and isoleucine degradation	0.00368616	Glyoxylate and dicarboxylate metabolism	0.0896385
		PPAR signaling pathway	0.000405887	Insulin secretion	0.0155021	Maturity onset diabetes of the young	0.0245383	Neuroactive ligand-receptor interaction	0.00153751			Glycine, serine and threonine metabolism	0.0218797	Maturity onset diabetes of the young	0.011842			Lysine degradation	0.00278697	beta-Alanine metabolism	0.0812855
		Neuroactive ligand-receptor interaction	0.000374597	Aldosterone synthesis and secretion	0.0153087	Protein export	0.0212833	Alcoholism	0.00140204			Homologous recombination	0.0198382	Phototransduction	0.011842			Retinol metabolism	0.0026288	Spliceosome	0.0704773
		Chemical carcinogenesis	0.000193231	Adrenergic signaling in cardiomyocytes	0.0141355	Fatty acid degradation	0.0157826	Ribosome	0.00028263			Wnt signaling pathway	0.0184244	Alanine, aspartate and glutamate metabolism	0.0113613			Thermogenesis	0.00238791	Taste transduction	0.0617356
		Drug metabolism	3.8487e-05	Oxidative phosphorylation	0.013554	Starch and sucrose metabolism	0.0106773	Thermogenesis	2.13491e-05			Vascular smooth muscle contraction	0.017414	Alcoholism	0.00950885			Chemical carcinogenesis	0.00208684	Base excision repair	0.0610738
		Ribosome biogenesis in eukaryotes	3.55489e-05	Retrograde endocannabinoid signaling	0.0124341	Steroid hormone biosynthesis	0.00997751	Olfactory transduction	3.78271e-07			Nucleotide excision repair	0.0163446	Starch and sucrose metabolism	0.0090812			mRNA surveillance pathway	0.00178949	Purine metabolism	0.0589612
		Ribosome	7.62007e-07	RNA transport	0.010619	Valine, leucine and isoleucine degradation	0.00830886					Parkinson disease	0.0140392	Mucin type O-glycan biosynthesis	0.00889491			Aminoacyl-tRNA biosynthesis	0.00146688	Arachidonic acid metabolism	0.0583819
		Olfactory transduction	3.9777e-07	Retinol metabolism	0.0102785	Nicotinate and nicotinamide metabolism	0.00715798					Melanogenesis	0.0127468	RNA polymerase	0.00889491			Cortisol synthesis and secretion	0.0011185	Steroid hormone biosynthesis	0.0583819
				Base excision repair	0.00922907	Chemical carcinogenesis	0.0065219					Aldosterone synthesis and secretion	0.0112006	Pyruvate metabolism	0.00885493			Neuroactive ligand-receptor interaction	0.00104243	Nicotinate and nicotinamide metabolism	0.0556485
				mRNA surveillance pathway	0.00679585	Pyruvate metabolism	0.00550834					Tryptophan metabolism	0.0101832	Retrograde endocannabinoid signaling	0.00708421			Spliceosome	0.000974847	Dilated cardiomyopathy (DCM)	0.0552131
				Basal cell carcinoma	0.00470806	Glycine, serine and threonine metabolism	0.00425248					Notch signaling pathway	0.00927916	Ubiquinone and other terpenoid-quinone biosynthesis	0.00673735			RNA transport	0.000528978	Amphetamine addiction	0.0434909
				Homologous recombination	0.0042922	PPAR signaling pathway	0.00304399					Cysteine and methionine metabolism	0.00845958	Renin secretion	0.00627095			Parkinson disease	0.000423168	Cortisol synthesis and secretion	0.0407158
				Parkinson disease	0.00217918	Taste transduction	0.00229603					Fanconi anemia pathway	0.00771603	Steroid hormone biosynthesis	0.00621234			Olfactory transduction	3.82034e-07	Neuroactive ligand-receptor interaction	0.0322609
				Huntington disease	0.00213157	Thermogenesis	0.00212009					Ribosome biogenesis in eukaryotes	0.00482425	Non-alcoholic fatty liver disease (NAFLD)	0.00617443					RNA degradation	0.0164222
				Cysteine and methionine metabolism	0.00142274	Proteasome	0.00198802					Ovarian steroidogenesis	0.00448235	Inflammatory mediator regulation of TRP channels	0.00583963					Ribosome biogenesis in eukaryotes	0.0137829
				Fanconi anemia pathway	0.00126157	Retinol metabolism	0.00173095					Spliceosome	0.00159318	Cysteine and methionine metabolism	0.0049356					Hypertrophic cardiomyopathy (HCM)	0.0135568
				Neuroactive ligand-receptor interaction	0.00114981	Tryptophan metabolism	0.00154982					Cortisol synthesis and secretion	0.00156726	alpha-Linolenic acid metabolism	0.00426188					Parkinson disease	0.0125515
				Melanogenesis	0.000945774	Ribosome biogenesis in eukaryotes	0.00105878					Ribosome	0.000786404	Alzheimer disease	0.0036388					Valine, leucine and isoleucine degradation	0.0101273
				Wnt signaling pathway	0.000643849	Oxidative phosphorylation	0.000948342					Neuroactive ligand-receptor interaction	0.000374597	Arachidonic acid metabolism	0.0028281					Retinol metabolism	0.00986399
				Ovarian steroidogenesis	0.000618268	mRNA surveillance pathway	0.000126557					Taste transduction	0.000316542	Tryptophan metabolism	0.00249227					Ovarian steroidogenesis	0.00935109
				Taste transduction	0.000368378	Parkinson disease	8.0408e-05					Thermogenesis	9.90333e-05	RNA degradation	0.00160046					Oxidative phosphorylation	0.00479604
				Amphetamine addiction	0.000172227	Neuroactive ligand-receptor interaction	5.49109e-05					Olfactory transduction	2.38662e-07	Tyrosine metabolism	0.00135012					RNA transport	0.00390877
				Spliceosome	4.88444e-05	Olfactory transduction	4.26598e-07							Ribosome biogenesis in eukaryotes	0.00132603					Thermogenesis	0.00251005
				Thermogenesis	1.12219e-05									Valine, leucine and isoleucine degradation	0.00118586					Ribosome	0.000636849
				Olfactory transduction	2.48564e-07									PPAR signaling pathway	0.00106654					mRNA surveillance pathway	0.000505447
														Herpes simplex virus 1 infection	0.000922832					Olfactory transduction	7.11037e-07
														Cardiac muscle contraction	0.000652191
														Fatty acid degradation	0.000385009
														Butanoate metabolism	0.000251323
														Ribosome	0.000177199
														MicroRNAs in cancer	0.000125223
														Linoleic acid metabolism	7.89099e-05
														Retinol metabolism	3.49929e-05
														Fat digestion and absorption	3.47431e-05
														Vitamin digestion and absorption	3.30683e-05
														RNA transport	7.65258e-06
														Taste transduction	6.81716e-06
														Huntington disease	6.20775e-06
														Neuroactive ligand-receptor interaction	5.64046e-06
														Spliceosome	4.76673e-06
														Olfactory transduction	2.77355e-06
														Thermogenesis	2.38142e-06
														Oxidative phosphorylation	1.69785e-06
														Aminoacyl-tRNA biosynthesis	1.62089e-06
														Parkinson disease	1.49088e-06
