# Supplementary material for: Gene expression in mouse muscle over time after nickel pellet implantation
Source: Royal Society of Chemistry journal article supplement (doi:10.1039/c9mt00289h), 2020-02-12
Supplement: c9mt00289h7.xlsx [file c9mt00289h7.xlsx]

## Sheet: Explanation
Analysis was carried out using EnrichR
The dots in each box indicate that this GO term was significant at that time point

## Sheet: GO Upregulated Genes
Week	2	6	9	12	15	18	21	24	27	30	33	37	41	46
No. of Sig. Biological Process GO Terms	44	54	276	216	7	1	147	13	3	130	38	0	22	16
neutrophil degranulation (GO:0043312)	•	•	•	•	•		•	•		•	•		•	•
regulation of cell migration (GO:0030334)	•	•	•	•			•	•	•	•				•
neutrophil mediated immunity (GO:0002446)	•	•	•	•	•		•	•		•	•		•	•
extracellular matrix organization (GO:0030198)	•	•	•	•	•	•	•	•		•	•		•	•
response to cytokine (GO:0034097)	•	•	•	•			•	•	•	•	•
neutrophil activ. involved in imm. resp. (GO:0002283)	•	•	•	•			•	•	•	•				•
positive regulation of cell migration (GO:0030335)	•	•	•	•	•		•	•		•	•		•	•
cellular response to cytokine stimulus (GO:0071345)	•	•	•	•	•		•	•		•	•		•	•
regulation of cell migration (GO:0030334)	•	•	•	•			•	•	•	•				•
reg. of extrinsic apoptotic sig. pathway (GO:2001236)			•	•	•						•
No. of Sig. Cellular Component GO Terms	16	61	40	43	26	1	53	12	0	38	32	0	3	2
ficolin-1-rich granule (GO:0101002)	•	•	•	•	•		•			•	•		•
focal adhesion (GO:0005925)	•	•	•	•	•		•	•		•	•		•
endoplasmic reticulum lumen (GO:0005788)	•	•	•	•	•	•	•	•		•	•		•
secretory granule lumen (GO:0034774)	•	•	•	•			•	•		•	•
tertiary granule (GO:0070820)	•	•	•	•	•		•	•		•	•		•
lysosome (GO:0005764)		•	•	•	•		•	•		•	•
lysosomal lumen (GO:0043202)		•	•	•	•		•	•		•	•			•
vacuolar lumen (GO:0005775)		•	•	•		•	•	•		•	•		•	•
tertiary granule membrane (GO:0070821)	•	•	•	•			•			•	•
lytic vacuole membrane (GO:0098852)	•	•	•	•			•			•	•
No. of Sig. Molecular Function GO Terms	0	0	20	19	0	0	9	28	0	10	0	0	7	0
actin binding (GO:0003779)			•	•			•	•		•
platelet-derived growth factor binding (GO:0048407)							•	•		•
collagen binding (GO:0005518)			•	•			•	•		•			•
cadherin binding (GO:0045296)			•	•			•	•		•
actin filament binding (GO:0051015)			•	•			•	•		•
integrin binding (GO:0005178)			•	•			•	•					•
kinase binding (GO:0019900)			•	•				•		•
cytokine activity (GO:0005125)			•				•						•
metalloendopeptidase activity (GO:0004222)				•						•			•
protein kinase binding (GO:0019901)				•				•		•

## Sheet: GO Downregulated Genes
Week	2	6	9	12	15	18	21	24	27	30	33	37	41	46
No. of Sig. Biological Process GO Terms	0	7	10	22	0	0	3	0	0	12	21	0	0	0
mitochondrial translation (GO:0032543)		•	•	•						•	•
branched-chain amino acid metabolic process (GO:0009081)				•			•
mitochondrial translational termination (GO:0070126)		•	•	•						•	•
translational elongation (GO:0006414)		•	•	•						•	•
cellular amino acid catabolic process (GO:0009063)				•			•
branched-chain amino acid catabolic process (GO:0009083)				•			•
mitochondrial translational elongation (GO:0070125)		•	•	•						•	•
translational termination (GO:0006415)		•	•	•						•	•
mitochondrial gene expression (GO:0140053)				•							•
translation (GO:0006412)		•		•						•	•
	0	4	3	8	0	0	3	0	0	21	6	0	0	0
mitochondrial inner membrane (GO:0005743)		•	•	•				•
mitochondrial small ribosomal subunit (GO:0005763)		•		•
mitochondrial matrix (GO:0005759)			•	•			•
mitochondrion (GO:0005739)		•	•	•			•	•
mitochondrial large ribosomal subunit (GO:0005762)		•		•
mitochondrial proton-transporting ATP synthase complex (GO:0005753)				•
peroxisome (GO:0005777)
mitochondrial respiratory chain complex I (GO:0005747)
microbody (GO:0042579)
peroxisomal part (GO:0044439)
	0	20	0	15	0	0	1	0	0	0	2	0	0	0
4 iron, 4 sulfur cluster binding (GO:0051539)
NADH dehydrogenase (ubiquinone) activity (GO:0008137)
acyl-CoA dehydrogenase activity (GO:0003995)
rRNA binding (GO:0019843)
NADH dehydrogenase (quinone) activity (GO:0050136)
translation initiation factor activity (GO:0003743)
nucleobase-containing compound kinase activity (GO:0019205)
proton-transporting ATP synthase activity, rotational mechanism (GO:0046933)
5'-3' RNA polymerase activity (GO:0034062)
ferrous iron binding (GO:0008198)
