# Supplementary material for: Gene expression in mouse muscle over time after nickel pellet implantation
Source: Royal Society of Chemistry journal article supplement (doi:10.1039/c9mt00289h), 2020-02-12
Supplement: c9mt00289h8.xlsx [file c9mt00289h8.xlsx]

## Sheet: Top 20 Genes
		Supplementary Figure 1. Top Upregulated and Top Downregulated Genes
Gene ID	Mean FC	Description	Main Function									Gene ID	Mean FC	Description	Main Function
Mmp13	1233.68	matrix metallopeptidase 13	breakdown of extracellular matrix; tissue remodelling									Syne1	-25.4793	spectrin repeat containing nuclear envelope protein 1	spectrin repeat containing protein expressed in skeletal and smooth muscle, and peripheral blood lymphocytes
Saa3	721.711	serum amyloid A3	acute phase protein; toll-like receptor 4 binding; chemoattractant									Actb	-22.7451	actin, beta	non-muscle highly conserved proteins that are involved in cell motility, structure, integrity, and intercellular signaling
Prl2c2	485.287	prolactin family 2, subfamily c, member 2	lactogen and growth hormone; may have role in wound healing									Cd209b	-10.5004	CD209 antigen-like protein B	involved in the innate immune system
Fcgr4	361.221	Fc receptor, IgG, low affinity IV	neutrophil activation; positive regulation of bone resorption									Siat10	-10.1375	ST3 Beta-Galactoside Alpha-2,3-Sialyltransferase 6	Involved in the synthesis of sialyl-paragloboside
Ccl4	257.122	chemokine (C-C motif) ligand 4	chemoattractand for monocytes and other immune cells									4921520G13Rik	-10.1281	ankyrin repeat domain 61	unknown
Mmp10	214.357	matrix metallopeptidase 10	breakdown of extracellular matrix; tissue remodelling									9030625A11Rik	-9.76625	NA	unknown
Cxcl1	207.531	chemokine (C-X-C motif) ligand 1	inflammation; chemoattractant for neutrophils									Idh3a	-9.50306	Isocitrate Dehydrogenase (NAD(+)) 3 Alpha	catalyze the oxidative decarboxylation of isocitrate to 2-oxoglutarate
Prl2c3	202.023	prolactin family 2, subfamily c, member 3	lactogen and growth hormone; may have role in wound healing									Phka1	-9.36859	Phosphorylase Kinase Regulatory Subunit Alpha 1	The alpha subunit includes the skeletal muscle and hepatic isoforms, and the skeletal muscle isoform is encoded by this gene
Clec4d	166.372	C-type lectin domain family 4, member d	inflammation and immune response									LOC240131	-9.27423	leucine rich repeat containing 30	N/A
Prl2c4	159.497	prolactin family 2, subfamily c, member 4	lactogen and growth hormone; may have role in wound healing									3222402P14Rik	-8.63547	RIKEN cDNA 3222402P14 gene, transcript variant 13	N/A
Spp1	158.986	secreted phosphoprotein 1	attachment of osteoclasts to the mineralized bone matrix									Prkag3	-8.32729	protein kinase, AMP-activated, gamma 3 non-catatlytic subunit, transcript variant 2
Il1b	157.522	interleukin 1 beta	produced by activated macrophages; mediator of the inflammatory response,									1810005K13Rik	-8.22575	heat shock factor binding protein 1-like 1	N/A
Cd72	143.292	CD72 antigen	B-cell differentiation and proliferation									2310065F04Rik	-8.07419	RIKEN cDNA 2310065F04 gene	Long, non-coding RNA; unknown function
Timp1	137	tissue inhibitor of metallopeptidase	metalloproteinase inhibitor; functions as a growth factor									Ctcfl	-7.90643	CCCTC-binding factor (zinc finger protein)-like	probably acts by recruiting epigenetic chromatin modifiers
Ccl7	112.651	chemokine (C-C motif) ligand 7	Chemotactic factor that attracts monocytes and eosinophils									1110049N09Rik	-7.88953	tubulin tyrosine ligase-like family	N/A
Serpina3g	96.4829	serine peptidase inhibitor, clade A, member 3G	innate immune system									Timp4	-7.84861	tissue inhibitor of metalloproteinase 4	may play role in hormonal regulation and endometrial tissue remodeling
Mmp3	86.1946	matrix metallopeptidase 3	breakdown of extracellular matrix; tissue remodelling									Plcd4	-7.82075	phospholipase C, delta 4	hydrolyzing phosphatidylinositol 4,5-bisphosphate into second messengers
AA467197	80.8863	expressed sequence AA467197	unknown									Amd2	-7.82007	S-adenosylmethionine decarboxylase proenzyme 2	maintains spermidine and spermine levels
Fpr2	78.4996	formyl peptide receptor 2	receptor for N-formyl-methionyl peptides, neutrophil chemotactic factors									Lrrc39	-7.72935	leucine rich repeat containing 39	plays a role in myocyte response to biomechanical stress
Slc15a3	71.0031	solute carrier family 15, member 3	proton oligopeptide cotransporter; expressed in macrophages									Rtn4	-7.72533	reticulon 4	associated with the endoplasmic reticulum
